# Supplementary material
Source: PubMed Central journal article supplement (PMC2820250)

## Supporting Information

### **A Modular Synthesis of Heparan Sulfate Oligosaccharides for Structure-Activity Relationship Studies**

Sailaja Arungundram,<sup>a,b</sup> Kanar Al-Mafraji,<sup>a</sup> Jinkeng Asong,<sup>a,b</sup> Franklin E. Leach III<sup>b</sup>, I. Jonathan Amster<sup>b</sup>, Andre Venot<sup>a</sup>, Jeremy E. Turnbull,<sup>c</sup> and Geert-Jan Boons<sup>a,\*</sup>

<sup>a</sup>Complex Carbohydrate Research Center, University of Georgia, 315 Riverbend Road, Athens, GA 30602, Tel: (+1) 706-542-9161, E-mail: gjboons@ccrc.uga.edu

<sup>b</sup>Department of Chemistry, University of Georgia, Athens, GA 30602-2556

<sup>c</sup>Center for Glycobiology, School of Biological Sciences, University of Liverpool, Crown Street, Liverpool L69 7ZB, UK

| <b>Contents</b>                                                                                                       | <b>Pages</b> |
|-----------------------------------------------------------------------------------------------------------------------|--------------|
| List of contents                                                                                                      | S2           |
| Experimental procedure for the preparation and characterization data of monosaccharides <b>1-32</b>                   | S3-S14       |
| Experimental procedure for the preparation and characterization data of disaccharides <b>37-56</b> and <b>S1-S24</b>  | S14-S57      |
| Experimental procedure for the preparation and characterization data of fully protected tetrasaccharides <b>70-75</b> | S57-S64      |
| Experimental procedure for the preparation and characterization data of hexasaccharides <b>63-69</b>                  | S64-S69      |
| <sup>1</sup> H NMR and <sup>13</sup> C spectra of compounds <b>1-32</b>                                               | S70-S90      |
| <sup>1</sup> H NMR and <sup>13</sup> C spectra of compounds <b>37-56</b> and <b>S1-S24</b>                            | S91-S194     |
| <sup>1</sup> H NMR and <sup>13</sup> C spectra of compounds <b>70-75</b>                                              | S195-S208    |
| <sup>1</sup> H NMR spectra of compounds <b>76-86</b>                                                                  | S209-S219    |
| <sup>1</sup> H NMR <sup>13</sup> C spectra of compound <b>63</b>                                                      | S220-S221    |
| <sup>1</sup> H NMR spectra of compounds <b>64-69</b>                                                                  | S222-S227    |
| MS-Spectra of compounds <b>76-86</b>                                                                                  | S228-S237    |
| MS-Spectra of compound <b>69</b>                                                                                      | S238         |

**General procedures:** All moisture sensitive reactions were performed under an argon atmosphere by using vacuum dried glassware. All commercial materials were used without purification, unless otherwise noted.  $\text{CH}_2\text{Cl}_2$  was freshly distilled from calcium hydride under nitrogen prior to use. Toluene, DMF, diethylether, methanol and THF were purchased anhydrous and used without further purification. Molecular sieves ( $4\text{\AA}$ ) were flame activated *in vacuo* prior to use. All reactions were performed at room temperature unless specified otherwise. TLC-analysis was conducted on Silica gel 60 F<sub>254</sub> (EMD Chemicals Inc.) with detection by UV-absorption (254 nm) were applicable, and by spraying with 20% sulfuric acid in ethanol followed by charring at  $\sim 150^\circ\text{C}$  or by spraying with a solution of  $(\text{NH}_4)_6\text{Mo}_7\text{O}_{24}\cdot\text{H}_2\text{O}$  (25 g/L) in 10% sulfuric acid in ethanol followed by charring at  $\sim 150^\circ\text{C}$ . Column chromatography was performed on silica gel G60 (Silicycle, 60-200  $\mu\text{m}$ , 60  $\text{\AA}$ ) or on Bondapak C-18 (Waters).  $^1\text{H}$  and  $^{13}\text{C}$  NMR spectra were recorded on a Varian inova-300 (300/75 MHz), a Varian inova-500 (500/125 MHz) and a Varian inova-600 (600/150 MHz) spectrometer equipped with sun workstations. Chemical shifts are reported in parts per million (ppm) relative to tetramethylsilane (TMS) as the internal standard. NMR data is presented as follows: Chemical shift, multiplicity (s = singlet, d = doublet, t = triplet, dd = doublet of doublet, m = multiplet and/or multiple resonances), coupling constant in Hertz (Hz), integration. All NMR signals were assigned on the basis of  $^1\text{H}$ NMR,  $^{13}\text{C}$  NMR, COSY and HSQC experiments. Optical rotations were measured using a Jasco P-1020 polarimeter. Mass spectra were recorded on an Applied Biosystems 4700 MALDI-TOF proteomics analyzer. The matrix used was 2,5-dihydroxy-benzoic acid (DHB) and ultamark 1621 as the internal standard. The ESI-MS spectra were recorded on 9.4 T Bruker Apex Ultra QeFTMS (Billerica, MA) mass spectrometer.

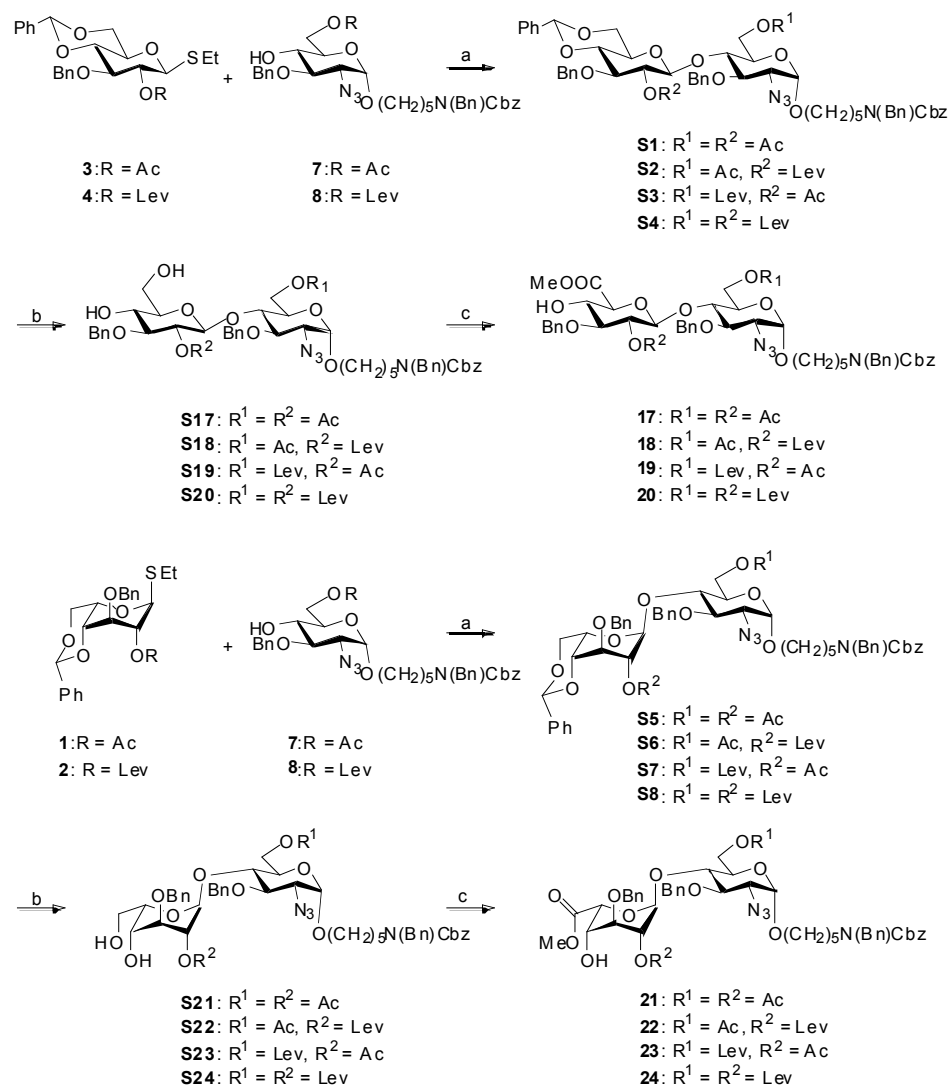

**Scheme A** (a) NIS, TMSOTf, 0°C, DCM; (b) (i) EtSH, *p*-TsOH, DCM, 1 h, room temperature or DCM:TFA:H<sub>2</sub>O, 30 min, room temperature; ii) TEMPO, BAIB, DCM, H<sub>2</sub>O, 1 h, room temperature; iii) CH<sub>2</sub>N<sub>2</sub>, THF, 0°C; (c) (i) FmocCl, Py, DMAP, 0°C to room temperature; (ii) HF·Py, THF, room temperature, 18 h; (iii) CCl<sub>3</sub>CN, K<sub>2</sub>CO<sub>3</sub>, 0°C, DCM.

**Ethyl 2-*O*-acetyl-3-*O*-benzyl-4,6-*O*-benzylidene-1-thio- $\alpha/\beta$ -L-idopyranoside (1):** A solution of compound **35** (1.0 g, 2.48 mmol) in pyridine: acetic anhydride (4/1, v/v, 0.2 M) was stirred for 6 hr at ambient temperature. The mixture was concentrated *in vacuo*. The residue was purified by silica gel column chromatography using a gradient of hexanes/EtOAc (85/15, v/v) to obtain **1** (1.04 g, 93%).  $[\alpha]_D^{25}$  -30.4 (*c* = 1, CHCl<sub>3</sub>); <sup>1</sup>HNMR (300MHz, CDCl<sub>3</sub>):  $\delta$  7.51-7.31 (m, 10H, CH

Aromatic), 5.50 (s, 1H, CH benzylidene  $\alpha$ ), 5.44 (m, 2H, H2 $\alpha$ , CH benzylidene  $\beta$ ), 5.08 (s, 1H, H1 $\alpha$ ), 5.05 (s, 1H, H1 $\beta$ ), 4.96 (bs, 1H, H2 $\beta$ ), 4.83 (d, 1H,  $J = 7.2$  Hz, CHHBn), 4.74 (d, 1H,  $J = 7.2$  Hz, CHHBn), 4.66 (d, 1H,  $J = 7.2$  Hz, CHHBn), 4.60 (d, 1H,  $J = 7.2$  Hz, CHHBn), 4.35 (d, 1H,  $J = 7.5$  Hz, H6a $\beta$ ), 4.30 (s, 1H, H5 $\alpha$ ), 4.27 (d, 1H,  $J = 7.5$  Hz, H6a $\alpha$ ), 4.12 (dd, 1H,  $J = 0.9$  Hz,  $J = 6.6$  Hz, H6b $\alpha$ ), 4.04 (dd, 1H,  $J = 0.9$  Hz,  $J = 6.6$  Hz, H6b $\beta$ ), 3.97 (s, 1H, H4 $\alpha$ ), 3.91 (s, 1H, H4 $\beta$ ), 3.87 (bs, 1H, H3 $\beta$ ), 3.74 (s, 1H, H3 $\alpha$ ), 3.69 (s, 1H, H5 $\beta$ ), 2.80-2.75 (m, 2H, CH<sub>2</sub>SEt  $\alpha$ ), 2.71-2.61 (m, 2H, CH<sub>2</sub>SEt  $\beta$ ), 2.06 (s, 3H, CH<sub>3</sub> Ac), 2.05 (s, 3H, CH<sub>3</sub> Ac), 1.33-1.30 (m, 6H, CH<sub>3</sub>SEt  $\alpha/\beta$ ). <sup>13</sup>CNMR (75.5 MHz, CDCl<sub>3</sub>):  $\delta$  170.5, 170.0, 137.9, 137.9, 137.2, 129.0, 128.9, 128.6, 128.4, 128.2, 128.1, 127.9, 127.8, 127.7, 127.6, 127.5, 126.5, 126.4, 126.3, 126.1, 125.9, 101.3, 100.9, 100.8, 95.6, 82.3, 82.2, 79.9, 77.4, 77.0, 76.5, 75.1, 73.5, 73.2, 77.2, 72.9, 72.7, 72.3, 72.2, 72.1, 71.9, 71.9, 71.7, 69.6, 69.5, 69.4, 69.4, 69.0, 68.7, 68.7, 68.6, 68.2, 68.2, 67.8, 67.4, 66.9, 65.4, 64.9, 63.6, 61.1, 59.7, 26.6, 26.1, 25.3, 21.0, 20.9, 20.7, 14.9, 14.8, 14.7. HRMS-MALDI: (M + Na<sup>+</sup>) calcd. 467.1504, found: 467.1576

**Ethyl 2-O-levulinoyl-3-O-benzyl-4,6-O-benzylidene-1-thio- $\alpha/\beta$ -L-idopyranoside (2):** A solution of DCC (0.51 g, 2.48 mmol) and DMAP (0.03 g, 0.25 mmol) in DCM (2 mL) was added to a solution of compound **35** (0.5 g, 1.24 mmol) and levulinic acid (0.21 g, 1.86 mmol) in DCM (0.2 M) at 0 °C. After stirring for 4 hr at ambient temperature, the mixture was filtered and the filtrate was concentrated *in vacuo*. The residue was purified by silica gel column chromatography using a gradient of hexanes/EtOAc (75/25, v/v) to obtain **2** (0.45 g, 89%).  $[\alpha]_D^{25}$  -90.9 ( $c = 2$ , CHCl<sub>3</sub>); <sup>1</sup>H NMR (300 MHz, CDCl<sub>3</sub>):  $\delta$  7.51-7.31 (m, 10H, CH Aromatic), 5.51 (s, 1H, CH benzylidene  $\alpha$ ), 5.46 (s, 1H, CH benzylidene  $\beta$ ), 5.41 (s, 1H, H2 $\alpha$ ), 5.09 (s, 1H, H1 $\alpha$ ), 5.03-5.04 (m, 1H, H1 $\beta$ ), 4.97-4.98 (bs, 1H, H2 $\beta$ ), 4.83 (d, 1H,  $J = 7.2$  Hz, CHHBn), 4.78 (d,

1H,  $J = 11.7$  Hz, CHHBn), 4.66 (d, 1H,  $J = 11.7$  Hz, CHHBn), 4.57 (d, 1H,  $J = 11.7$  Hz, CHHBn), 4.35 (d, 1H,  $J = 12.6$  Hz, H6a $\beta$ ), 4.29-4.25 (m, 2H, H6a $\alpha$ , H5 $\alpha$ ), 4.10 (dd, 1H,  $J = 1.8$  Hz,  $J = 10.5$  Hz, H6b $\alpha$ ), 4.04 (dd, 1H,  $J = 2.7$  Hz,  $J = 10.8$  Hz, H6b $\beta$ ), 3.97 (s, 1H, H4 $\alpha$ ), 3.91 (bs, 1H, H4 $\beta$ ), 3.85 (bs, 1H,  $J = 2.4$  Hz, H3 $\beta$ ), 3.71-3.68 (m, 2H, H3 $\alpha$ , H5 $\beta$ ), 2.80-2.53 (m, 12H, CH<sub>2</sub> SEt  $\alpha/\beta$ , 4 x CH<sub>2</sub> Lev  $\alpha/\beta$ ), 1.99 (s, 3H, CH<sub>3</sub> Lev), 1.98 (s, 3H, CH<sub>3</sub> Lev), 1.33-1.27 (m, 6H, CH<sub>3</sub> SEt $\alpha/\beta$ ). <sup>13</sup>CNMR (75.5 MHz, CDCl<sub>3</sub>):  $\delta$  206.4, 171.7, 138.0, 137.3, 128.9, 128.5, 128.4, 128.3, 128.0, 128.0, 127.8, 127.8, 127.7, 127.6, 126.3, 126.2, 126.1, 100.9, 82.4, 77.4, 77.9, 76.6, 73.8, 73.1, 72.9, 72.1, 72.0, 69.8, 68.3, 67.9, 67.3, 63.2, 59.8, 37.9, 37.8, 37.6, 29.6, 29.5, 28.3, 28.2, 28.0, 26.7, 14.9. HRMS-MALDI: (M + Na<sup>+</sup>) calcd. 523.1766 found 523.1796

**Ethyl 2-O-acetyl-3-O-benzyl-4,6-O-benzylidene-1-thio- $\beta$ -D- glucopyranoside (3):** A solution of compound **36** (13.9 g, 34.5 mmol) in pyridine: acetic anhydride (4/1, v/v, 0.2 M) was stirred for 6 hr at ambient temperature. TLC (hexanes/EtOAc, 70/30, v/v) indicated the consumption of the starting material, after which the mixture was concentrated *in vacuo*. The residue was purified by silica gel column chromatography using a gradient of hexanes/EtOAc (80/20, v/v) to obtain **1** (13.0 g, 85%).  $[\alpha]_D^{25}$  -5.7 ( $c = 1$ , CHCl<sub>3</sub>); <sup>1</sup>H NMR (300 MHz, CDCl<sub>3</sub>):  $\delta$  7.51-7.25 (10H, CH Aromatic), 5.58 (s, 1H, CH benzylidene), 5.09-5.02 (m, 1H, H2), 4.89 (d, 1H,  $J = 12.0$  Hz, CHHBn), 4.68 (d, 1H,  $J = 12.0$  Hz, CHHBn), 4.48 (d, 1H,  $J = 10.2$  Hz, H1), 4.38 (dd, 1H,  $J = 4.8$  Hz,  $J = 5.7$  Hz, H6a), 3.82-3.71 (m, 3H, H3, H4, H6b), 3.503-3.46 (m, 1H, H5), 2.74-2.67 (m, 2H, CH<sub>2</sub>SEt), 2.01 (s, 1H, CH<sub>3</sub> Ac), 1.25 (t, 3H,  $J = 7.5$  Hz, CH<sub>3</sub>SEt). <sup>13</sup>C NMR (75.5 MHz, CDCl<sub>3</sub>):  $\delta$  169.3, 138.1, 138.1, 137.1, 128.9, 128.2, 128.2, 127.7, 127.6, 125.9, 101.1, 84.1, 81.4,

79.6, 77.4, 77.0, 76.6, 74.2, 71.1, 70.5, 68.5, 23.8, 20.8, 14.7. HRMS-MALDI: (M + Na<sup>+</sup>) calcd. 467.1504, found: 467.1585

**Ethyl 2-O-levulinoyl-3-O-benzyl-4,6-O-benzylidene-1-thio-β-D-glucopyranoside (4):** A solution of DCC (0.5 g, 1.24 mmol) and DMAP (0.03 g, 0.25 mmol) in DCM (2 mL) was added to a solution of compound **36** (0.5 g, 1.24 mmol) and levulinoylic acid (0.21 g, 1.86 mmol) in DCM (0.2 M) at 0 °C. After stirring for 4hr at ambient temperature TLC (hexanes/EtOAc, 70/30, v/v) indicated the consumption of the starting material, the mixture was filtered and the filtrate was concentrated *in vacuo*. The residue was purified by silica gel column chromatography using a gradient of hexanes/EtOAc to obtain **2** (0.42 g, 70%). [α]<sub>D</sub><sup>25</sup> -22.9 (*c* = 1, CHCl<sub>3</sub>); <sup>1</sup>HNMR (300 MHz, CDCl<sub>3</sub>): δ 7.47-7.25 (10H, CH Aromatic), 5.58 (s, 1H, CH benzylidene), 5.08-5.02 (m, 1H, H2), 4.89 (d, 1H, *J* = 12.0 Hz, CHHBn), 4.68 (d, 1H, *J* = 12.0 Hz, CHHBn), 4.48 (d, 1H, *J* = 9.9 Hz, H1), 4.38 (dd, 1H, *J* = 4.8 Hz, *J* = 5.7 Hz, H6a), 3.81-3.71 (m, 3H, H3, H4, H6b), 3.50-3.47 (m, 1H, H5), 2.75-2.64 (m, 4H, CH<sub>2</sub> SEt, CH<sub>2</sub> Lev), 2.54 (t, 2H, *J* = 6.6 Hz, CH<sub>2</sub> Lev), 2.17 (s, 3H, CH<sub>3</sub> Lev), 1.25 (t, 3H, *J* = 7.5 Hz, CH<sub>3</sub> SEt). <sup>13</sup>C NMR (75.5 MHz, CDCl<sub>3</sub>): δ 206.1, 171.4, 138.1, 137.1, 129.0, 128.2, 127.9, 127.6, 125.9, 101.2, 84.1, 81.4, 79.5, 77.4, 77.0, 76.6, 74.3, 71.6, 70.6, 68.5, 37.8, 29.8, 27.9, 24.0, 14.8. HRMS-MALDI: (M + Na<sup>+</sup>) calcd. 523.1766, found 523.1773.

**Dimethylhexylsilyl 6-O-acetyl-2-azido-3-O-benzy2-deoxy-β-D-glucopyranoside (5):** To a solution of compound **31** (1.62 g, 3.70 mmol) in DCM (62 mL) was added acetic acid (0.44 g, 7.4 mmol) and 2-chloromethyl pyridinium iodide (CMPI) (2.36 g, 9.25 mmol). The mixture was stirred for 15 minutes at room temperature followed by the addition of 1,4-

diazabicyclo[2,2,2]octane (DABCO) (0.980 g, 8.75 mmol). Stirring was continued until TLC indicated consumption of starting material (~ 1.5 hr). The reaction mixture was filtered through Celite, diluted with EtOAc (40 mL), and washed with brine (2 x 20 mL). The combined organic layers were dried (MgSO<sub>4</sub>), filtered and the filtrate concentrated *in vacuo*. Silica gel column chromatography of the residue (hexanes/EtOAc, 75/25, v/v) afforded **5** (1.20 g, 67%). <sup>1</sup>H NMR (300 MHz, CDCl<sub>3</sub>): δ 7.37-7.24 (m, 5H, CH aromatic), 4.93 (d, 1H, *J* = 11.4 Hz, CHHBn), 4.71 (d, 1H, *J* = 11.4 Hz, CHHBn), 4.50 (d, 1H, *J* = 7.2 Hz, H1), 4.28 (m, 2H, H6a, H6b), 3.46-3.36 (m, 2H, H4, H5), 3.28 (dd, *J* = 7.2 Hz, *J* = 9.7 Hz, 1H, H2), 3.10 (dd, *J* = 8.0 Hz, *J* = 9.7 Hz, 1H, H3), 2.05 (s, 3H, CH<sub>3</sub> Lev), 1.65-1.56 [m, 1H, CH(CH<sub>3</sub>)<sub>2</sub>], 0.89-0.87 [4s, 12H, C(CH<sub>3</sub>)<sub>2</sub> and CH(CH<sub>3</sub>)<sub>2</sub>], 0.18-0.17 [2s, 6H, Si(CH<sub>3</sub>)<sub>2</sub>]. HRMS-MALDI: (M + Na<sup>+</sup>) calcd. 502.2349, found 502.2367.

**Dimethylthexylsilyl 6-O-levulinoyl-2-azido-3-O-benzyl-2-deoxy-β-D-glucopyranoside (6):**

To a solution of **31** (1.82 g, 4.16 mmol) in DCM (70 mL) was added levulinic acid (0.96 g, 8.32 mmol) and 2-chloromethyl pyridinium iodide (CMPI) (2.66 g, 10.4 mmol). The mixture was stirred for 15 minutes at room temperature followed by the addition of 1,4-diazabicyclo[2,2,2]octane (DABCO) (1.77 g, 15.8 mmol). Stirring was continued until TLC indicated consumption of the starting material (~ 2 hr). The reaction mixture was filtered through Celite, diluted with EtOAc (50 mL), and washed with brine (2 x 25 mL). The combined organic layers were dried (MgSO<sub>4</sub>), filtered, the filtrate was concentrated *in vacuo*. Silica gel column chromatography (Hexanes/EtOAc, 75/25, v/v) afforded **6** (2.0 g, 89%). [ $\alpha$ ]<sub>D</sub><sup>25</sup> +24.2 (*c* = 1, CHCl<sub>3</sub>); <sup>1</sup>H NMR (300 MHz, CDCl<sub>3</sub>): δ 7.49-7.07 (m, 5H, CH Aromatic), 4.94 (d, 1H, *J* = 11.3 Hz, CHHBn), 4.74 (d, 1H, *J* = 11.3 Hz, CHHBn), 4.50 (d, 1H, *J* = 7.6 Hz, H1), 4.36 (dd, 1H, *J* =



5.0 Hz,  $J = 11.7$  Hz, H6a), 4.30 (bd,  $J = 11.7$ , 1H, H6b), 3.48-3.39 (m, 2H, H4, H5), 3.30 (dd, 1H,  $J = 7.6$  Hz,  $J = 10.0$  Hz, H2), 3.21 (dd, 1H,  $J = 8.5$  Hz,  $J = 10.0$  Hz, H3), 2.76-2.72 (m, 2H,  $CH_2$  Lev), 2.59 (m, 3H,  $CH_2$  Lev, 4-OH), 2.17 (s, 3H,  $CH_3$  Lev), 1.70-1.62 [m, 1H,  $CH(CH_3)_2$ ], 0.89-0.87 [4s, 12H,  $C(CH_3)_2$  and  $CH(CH_3)_2$ ], 0.18-0.17 [2s, 6H,  $Si(CH_3)_2$ ].  $^{13}C$  NMR (75.5 MHz,  $CDCl_3$ ):  $\delta$  206.8, 173.2, 138.1, 128.7, 128.1, 97.1, 82.1, 75.0, 73.6, 70.2, 68.3, 63.5, 37.9, 33.9, 29.8, 27.9, 24.8, 19.9, 19.8, 18.5, 18.4, -2.1, -3.3. HRMS-MALDI: (M + Na<sup>+</sup>) calcd. 558.2611, found 558.2637.

***N*-(Benzyl)-benzyloxycarbonyl-5-aminopentyl *O*-2-azido-3,4,6-tri-*O*-acetyl-2-deoxy- $\alpha$ -D-glycopyranoside (28)**: Trichloroacetimidate **27** (25.4 g, 53.0 mmol) and *N*-(benzyl)-*N*-benzyloxycarbonyl-5-aminopentan-1-ol (20.9 g, 64.0 mmol) were co-evaporated with toluene (3 x 50 mL) and dissolved in a mixture of DCM (120 mL) and diethyl ether (400 mL) and stirred in the presence of powdered molecular sieves (3Å, 40 g) for 1hr at room temperature. TMSOTf (2.65 mmol, 0.480 ml) was slowly added to the mixture at -20°C. After stirring at -20°C for 1h, the reaction mixture was allowed to reach room temperature and then quenched with pyridine (0.5 mL). After filtration, the reaction mixture was extracted with saturated sodium bicarbonate (500 mL), brine (2 x 200 mL) and dried ( $MgSO_4$ ). The organic layers were filtered and the filtrate concentrated *in vacuo*. NMR of the crude residue indicated  $\alpha/\beta$  ratio of 3:1. Silica gel column chromatography (hexanes/EtOAc, 80/20, v/v) provided the pure  $\alpha$ -glycoside **28** (23.2g, 68%).  $[\alpha]_D^{25} +10.8$  ( $c = 1.00$ ,  $CHCl_3$ );  $^1H$  NMR (300 MHz,  $CDCl_3$ ):  $\delta$  7.45-7.10 (m, 10H, CH Aromatic), 5.44 (dd, 1H,  $J = 9.2$  Hz,  $J = 10.3$  Hz, H3), 5.24-5.14 (m, 2H,  $CH_2$  Cbz), 5.04 (dd, 1H,  $J = 9.9$  Hz, H4), 4.51 (bs, 2H,  $NCH_2Bn$ ), 4.24 (dd, 1H,  $J = 3.4$  Hz,  $J = 12.4$  Hz, H6a), 4.10-3.94 (m, 2H, H6b, H5), 3.76-3.58 (m, 1H,  $OCHH$  Linker), 3.54- 3.36 (m, 1H,  $OCHH$  Linker),

3.34-3.15 (m, 3H, H2, CH<sub>2</sub>N Linker), 2.09- 2.03 (3s, 9H, 3 x CH<sub>3</sub> Ac), 1.70-1.40 (m, 6H, 3 x CH<sub>2</sub> Linker). <sup>13</sup>CNMR (75.5 MHz, CDCl<sub>3</sub>): δ 170.5, 169.9, 169.6, 137.8, 136.9, 128.9, 128.5, 128.4, 128.2, 127.9, 127.8, 127.2, 97.8, 70.3, 68.6, 68.5, 67.5, 67.1, 61.8, 60.7, 50.4, 50.1, 46.9, 46.1, 28.9, 27.8, 27.3, 23.3, 20.6, 20.5. HRMS-MALDI: (M + Na<sup>+</sup>) calcd. 663.2637, found 663.2656.

***N*-(Benzyl)-benzyloxycarbonyl-5-aminopentyl O-2-azido-4,6-O-benzylidene-2-deoxy- $\alpha$ -D-glycopyranoside (30)**: CH<sub>3</sub>ONa in MeOH (0.5 M) was added to **28** (13.7 g, 22.0 mmol) dissolved in MeOH (80 mL) until the reaction mixture reached pH 12. The mixture was stirred overnight until TLC (chloroform/MeOH, 9/1, v/v) indicated the completion of the reaction. After neutralization with Dowex 50-H<sup>+</sup> resin, the mixture was filtered through Celite and concentrated *in vacuo*. Silica gel column chromatography of the residue (chloroform/MeOH (95/5→93/7, v/v) provided (11.0 g, 97%) of the deacetylated compound which was directly used in the next step. *p*-toluene sulfonic acid (100 mg, 0.52 mmol) was added to the solution of the starting material (11.0 g, 21.4 mmol) and benzaldehyde dimethyl acetal (5.06 g, 33.0 mmol) in CH<sub>3</sub>CN (110 mL). After 16 hr, the reaction mixture was neutralized with triethylamine and concentrated *in vacuo*. Silica gel chromatography of the residue (hexanes/EtOAc, 80/20→70/30, v/v) provided **30** (10.0g, 76%). [ $\alpha$ ]<sub>D</sub><sup>25</sup> +45 (*c* = 1.00, CHCl<sub>3</sub>); <sup>1</sup>H NMR (300 MHz, CDCl<sub>3</sub>): δ 7.55-7.10 (m, 15H, Aromatic), 5.46 (s, 1H, benzylidene), 5.24-5.16 (m, 2H, CH<sub>2</sub>Cbz), 4.86 (bs, 1H, H1), 4.50 (bs, 2H, NCH<sub>2</sub>Bn), 4.30-4.18 (m, 2H, H6a, H3), 3.88-3.62 (m, 3H, H5, H6b, OCHH Linker), 3.50 (t, 1H, *J* = 9.1 Hz, H4), 3.47-3.33 (m, 1H, CHH Linker), 3.32-3.16 (m, 3H, incl. H2: dd, *J* = 3.7 Hz, *J* = 10.2 Hz, CH<sub>2</sub>N Linker), 2.75 (d, 1H, *J* = 3.0 Hz, 3-OH), 1.67-1.53 (m, 4H, 2 x CH<sub>2</sub>Linker), 1.45-1.34 (m, 2H, CH<sub>2</sub> Linker). <sup>13</sup>C NMR (75.5 MHz, CDCl<sub>3</sub>): δ 137.8, 136.8, 129.3, 128.5,

128.4, 128.3, 127.9, 127.8, 127.2, 102.0, 98.5, 81.9, 68.8, 68.6, 68.4, 67.1, 63.0, 62.4, 29.0, 27.8, 27.4, 23.2. HRMS-MALDI: (M + Na<sup>+</sup>) calcd. 625.2640, found 625. 2721.

***N*-(Benzyl)-benzyloxycarbonyl-5-aminopentyl**      ***O*-2-azido-3-*O*-benzyl-2-deoxy- $\alpha$ -D-glycopyranoside (32)**: NaH (1.0 g, 26.0 mmol) was added to a solution **30** (10.0 g, 16.6 mmol) in DMF (85 mL). The mixture was stirred for 30 minutes at room temperature prior to addition of benzyl bromide (3.69 g, 21.5 mmol). The reaction was followed by TLC (hexanes/EtOAc, 2/1, v/v). After stirring overnight at room temperature, the reaction was quenched with acetic acid (0.5 mL) and concentrated *in vacuo*. The residue was dissolved in EtOAc (500 mL), washed with water and brine (2 x 100mL) and dried (MgSO<sub>4</sub>), filtered and concentrated *in vacuo*. Silica gel chromatography of the residue (hexanes/EtOAc, 95/15→70/30, v/v) provided *N*-(Benzyl)-benzyloxycarbonyl-5-aminopentyl *O*-2-azido-3-*O*-benzyl-4,6-*O*-benzylidene-2-deoxy- $\alpha$ -D-glycopyranoside (10.8 g, 93%). [ $\alpha$ ]<sub>D</sub><sup>25</sup> +58 (*c* = 1.00, CHCl<sub>3</sub>); <sup>1</sup>H NMR (300 MHz, CDCl<sub>3</sub>):  $\delta$  7.45-7.10 (m, 15H, Aromatic), 5.60 (s, 1H, *CH* benzylidene), 5.24-5.16 (m, 2H, *CH*<sub>2</sub> Cbz), 4.96 (d, 1H, *J* = 11.0 Hz, *CHHBn*), 4.90- 4.78 (m, 2H, *CHHBn*, H1), 4.50 (bs, 2H, *NCH*<sub>2</sub>Bn), 4.28 (dd, 1H, *J* = 4.4 Hz, *J* = 9.9 Hz, H6a), 4.08 (dd, 1H, *J* = 9.1 Hz, *J* = 10.2 Hz, H3), 3.91-3.60 (m, 4H, incl. H4, H5, H6b, *OCHH* Linker), 3.42-3.17 (m, 4H, *OCHH* Linker, *CH*<sub>2</sub>N Linker, H2), 1.70-1.40 (m, 6H, 3 x *CH*<sub>2</sub> Linker). <sup>13</sup>C NMR (75.5 MHz, CDCl<sub>3</sub>):  $\delta$  156.8, 156.3, 137.8, 136.8, 128.5, 128.4, 128.3, 128.2 127.9, 127.8, 127.3, 101.4, 98.5 (C1), 82.8, 76.0, 75.0, 66.9, 67.1 62.9, 62.7, 50.53, 50.25, 47.0, 46.1, 29.0, 27.8, 27.4 23.2. HRMS-MALDI: (M + Na<sup>+</sup>) calcd. 692.321, found 692.3321.

A solution of *N*-(Benzyl)-benzyloxycarbonyl-5-aminopentyl *O*-2-azido-3-*O*-benzyl-4,6-*O*-benzylidene-2-deoxy- $\alpha$ -D-glycopyranoside (4.6 g, 6.6 mmol) in acetic acid (60 mL) and H<sub>2</sub>O (6

mL) was heated at 90°C. After 1 hr, TLC (hexanes/EtOAc, 2/1, v/v) indicated the consumption of the starting material. The reactions mixture was co-evaporated with an excess of toluene and the residue was purified using silica gel chromatography (hexanes/EtOAc, 60/40, v/v) affording **32** (6.9g, 92%).  $[\alpha]_D^{25} +54$  ( $c = 1.00$ ,  $\text{CHCl}_3$ ).  $^1\text{H NMR}$  (300 MHz,  $\text{CDCl}_3$ ):  $\delta$  7.45-7.10 (m, 15H, CH Aromatic), 5.24-5.12 (m, 2H,  $\text{CH}_2$  Cbz), 4.96-4.78 (m, 3H,  $\text{CHHBn}$ ,  $\text{CHHBn}$ , H1), 4.51 (bs, 2H,  $\text{NCH}_2\text{Bn}$ ), 3.85-3.55 (m, 6H, H3, H4, H5, H6a, H6b,  $\text{OCHH}$  Linker), 3.50-3.18 (m, 4H, H2,  $\text{OCHH}$  Linker,  $\text{CH}_2\text{N}$  Linker), 1.70-1.20 [m, 6H,  $(\text{CH}_2)_3$ ].  $^{13}\text{CNMR}$  (75.5 MHz,  $\text{CDCl}_3$ ):  $\delta$  156.8, 156.4, 138.1, 137.7, 136.4, 128.5, 128.4, 128.0, 127.9, 127.8, 127.3, 127.2, 97.8 C1, 79.8, 74.9, 72.0, 71.2, 68.0, 67.7, 67.3, 62.8, 62.7, 62.2, 50.4, 47.3, 46.0, 28.7, 27.8, 27.1, 23.4. HRMS-MALDI : ( $\text{M} + \text{Na}^+$ ) calcd. 622.2797, found 622.2810.

***N*-(Benzyl)-benzyloxycarbonyl-5-aminopentyl *O*-2-azido-6-*O*-levulinoyl-3-*O*-benzyl-2-deoxy- $\alpha$ -D-glycopyranoside (8)**: To a solution of **32** (2.0 g, 3.30 mmol) in DCM (45mL) was added levulinic acid (0.42 g, 3.63 mmol) and 2-chloromethyl pyridinium iodide (CMPI) (2.10 g, 8.25 mmol). The mixture was stirred for 15 minutes at room temperature and then cooled to -20°C followed by the addition of 1,4-diazabicyclo[2,2,2]octane (1.29 g, 11.55 mmol). The reaction mixture was allowed to warm up slowly to room temperature. Stirring was continued until TLC (hexanes/EtOAc, 1/1, v/v) indicated consumption of starting material (~ 1.5 hr). The reaction mixture was filtered through Celite, diluted with EtOAc (100 mL) and washed with a 5% solution of NaCl (2 x 25 mL). The organic layers were dried ( $\text{MgSO}_4$ ), filtered and the filtrate was concentrated *in vacuo*. Silica gel column chromatography of the residue (hexanes/EtOAc, 26/74, v/v) afforded **6** (3.80 g, 82%).  $[\alpha]_D^{25} +63$  ( $c = 1.00$ ,  $\text{CHCl}_3$ );  $^1\text{H NMR}$  (500 MHz, 95:5  $\text{CD}_3\text{COCD}_3/\text{CD}_3\text{OD}$ ):  $\delta$  7.40-7.10 (m, 15H, CH Aromatic), 5.22-5.12 (m, 2H,  $\text{CH}_2$  Cbz), 5.0 (d, 1H,  $J = 11.2$  Hz,  $\text{CHHBn}$ ), 4.92-4.83 (m, 1H, H1), 4.78 (d, 1H,  $J = 11.2$  Hz,

CHHBn), 4.54 (bs, 2H, NCH<sub>2</sub>Bn), 4.17 (bd, 1H, *J* = 11.8 Hz, H6a), 4.20 (dd, 1H, *J* = 6.2 Hz, *J* = 11.8 Hz, H6b), 3.86-3.77 (m, 2H, H3, H5), 3.77-3.64 (m, 1H, OCHH Linker), 3.60 (dd, 1H, *J* = 9.1 Hz, *J* = 9.5 Hz, H4), 3.48-3.36 (m, 1H, OCHH Linker), 3.32-3.22 (m, 3H incl. H2: dd, *J* = 3.4 Hz, *J* = 10.2 Hz, CH<sub>2</sub>N Linker), 2.76-2.71 (t, 2H, *J* = 6.5 Hz, CH<sub>2</sub> Lev), 2.52 (t, 2H, *J* = 6.5 Hz, CH<sub>2</sub> Lev), 2.11 (s, 3H, CH<sub>3</sub> Ac), 1.67-1.53 (m, 4H, 2 x CH<sub>2</sub> Linker), 1.45-1.34 (m, 2H, CH<sub>2</sub> Linker). <sup>13</sup>C NMR (75.5 MHz, CDCl<sub>3</sub>): δ 206.5, 173.3, 138.0, 137.8, 128.5, 128.4, 128.0, 127.9, 127.8, 127.2, 97.8, 79.3, 75.0, 70.8, 70.6, 70.0, 68.1, 67.1, 63.1, 62.7, 50.3, 47.3, 46.0, 37.8, 29.7, 28.8, 27.7, 27.3, 23.5. HRMS-MALDI: (M + Na<sup>+</sup>) calcd. 725.3157, found 725.3145.

***N*-(Benzyl)-benzyloxycarbonyl-5-aminopentyl *O*-6-*O*-acetyl-2-azido-3-*O*-benzyl-2-deoxy- $\alpha$ -D-glycopyranoside (7):** To a solution of compound **32** (1.5 g, 2.50 mmol) in DCM (45 mL) was added acetic acid (0.165 g, 2.50 mmol) and 2-chloromethyl pyridinium iodide (CMPI) (1.59 g, 6.25 mmol). The mixture was stirred for 15 minutes at room temperature and then cooled to -20°C followed by the addition of 1,4-diazabicyclo[2,2,2]octane (0.98 g, 8.75 mmol). The reaction was slowly warmed to room temperature in about 1.5hr and the progress of the reaction was monitored by TLC (hexanes/EtOAc, 1/1, v/v). The reaction mixture was filtered through Celite, diluted with EtOAc (100 mL) and washed with 5% solution of NaCl (2 x 25 mL). The organic layers were dried (MgSO<sub>4</sub>), filtered and the filtrate was concentrated *in vacuo*. Silica gel column chromatography of the residue (hexanes/EtOAc, 75/25, v/v) provided **7** (1.10 g, 68%). [ $\alpha$ ]<sub>D</sub><sup>25</sup> +50 (*c* = 1.00, CHCl<sub>3</sub>); <sup>1</sup>H NMR (500 MHz, 95:5 CD<sub>3</sub>COCD<sub>3</sub>/CD<sub>3</sub>OD): δ 7.40-7.10 (m, 15H, CH Aromatic), 5.22-5.12 (m, 2H, CH<sub>2</sub> Cbz), 5.00 (d, 1H, *J* = 11.2 Hz, CHHBn), 4.92-4.84 (m, 1H, H1), 4.78 (d, 1H, *J* = 11.2 Hz, CHHBn), 4.54 (bs, 1H, NCH<sub>2</sub>Bn), 4.14 (bd, 1H, *J* = 11.8 Hz, H6a), 4.20 (dd, 1H, *J* = 6.2 Hz, *J* = 11.8 Hz, H6b), 3.86-3.77 (m, 2H, H3, H5), 3.77-3.64 (m, 1H,

OCHH Linker), 3.60 (dd, 1H,  $J = 9.1$  Hz,  $J = 9.5$  Hz, H4), 3.48-3.36 (m, 1H, OCHH Linker), 3.32-3.22 (m, 3H incl. H2: dd,  $J = 3.4$  Hz,  $J = 10.2$  Hz, H2, CH<sub>2</sub>N Linker), 2.00 (s, 3H, CH<sub>3</sub> Ac), 1.67-1.53 (m, 4H, 2 x CH<sub>2</sub> Linker), 1.45-1.34 (m, 2H, CH<sub>2</sub> Linker). <sup>13</sup>C NMR (75.5 MHz, CDCl<sub>3</sub>): δ 171.6, 156.7, 156.2, 137.9, 137.8, 136.8, 136.5, 128.6, 128.5, 128.4, 128.1, 128.0, 127.9, 127.8, 127.3, 87.9, 79.4, 75.1, 70.9, 70.6, 70.0, 68.1, 67.2, 62.9, 62.8, 50.4, 47.3, 46.0, 28.8, 27.3, 23.5, 23.3, 20.7. HRMS-MALDI: (M + Na<sup>+</sup>) calcd. 669.2895, found 669.2901.

**Dimethylhexylsilyl O-(2-O-acetyl-3-O-benzyl-4,6-O-benzylidene-β-D-glucopyranosyl)-(1→4)-O-2-azido-3-O-benzyl-6-O-acetyl-2-deoxy-β-D-glucopyranoside (37):** Glycosyl donor **3** (25 mg, 0.056 mmol) was coupled with acceptor **5** (22.5 mg, 0.047 mmol) according to the general glycosylation procedure for synthesis of disaccharides to give disaccharide **37** (33 mg, 81%). [ $\alpha$ ]<sub>D</sub><sup>25</sup> +4.8 ( $c = 1.00$ , CHCl<sub>3</sub>); <sup>1</sup>H NMR (500 MHz, CDCl<sub>3</sub>): δ 7.44-7.25 (m, 15H, CH Aromatic), 5.48 (s, 1H, CH benzylidene), 5.00 (t, 1H,  $J = 8.5$  Hz, H2<sup>B</sup>), 4.87 (d, 1H,  $J = 10.5$  Hz, CHHBn), 4.86 (d, 1H,  $J = 12.0$  Hz, CHHBn), 4.78 (d, 1H,  $J = 10.5$  Hz, CHHBn), 4.63 (d, 1H,  $J = 12.0$  Hz, CHHBn), 4.52 (d, 1H,  $J = 8.0$  Hz, H1<sup>B</sup>), 4.46 (d, 1H,  $J = 7.5$  Hz, H1<sup>A</sup>), 4.41 (dd, 1H,  $J = 1.5$  Hz,  $J = 11.5$  Hz, H6a<sup>A</sup>), 4.09-4.05 (m, 2H, H6a<sup>B</sup>, H6b<sup>A</sup>), 3.72-3.65 (m, 3H, H3<sup>B</sup>, H4<sup>A</sup>, H4<sup>B</sup>), 3.45-3.41 (m, 2H, H5<sup>A</sup>, H6b<sup>B</sup>), 3.36-3.27 (m, 3H, H2<sup>A</sup>, H3<sup>A</sup>, H5<sup>B</sup>), 2.06 (s, 3H, CH<sub>3</sub> Ac), 2.00 (s, 3H, CH<sub>3</sub> Ac), 1.62-1.56 [m, 1H, CH(CH<sub>3</sub>)<sub>2</sub>], 0.88-0.86 [4s, 12H, C(CH<sub>3</sub>)<sub>2</sub> and CH(CH<sub>3</sub>)<sub>2</sub>], 0.17-0.15 [2s, 6H, Si (CH<sub>3</sub>)<sub>2</sub>]. <sup>13</sup>C NMR (75.5 MHz, CDCl<sub>3</sub>): δ 170.4, 169.3, 138.4, 138.0, 137.0, 129.0, 128.3, 128.2, 128.2, 127.7, 127.7, 127.6, 127.3, 125.9, 101.6, 101.1, 96.7, 81.4, 80.8, 78.6, 78.3, 77.4, 77.0, 76.5, 75.1, 74.2, 73.2, 72.8, 68.4, 68.3, 66.3, 62.4, 33.9, 24.8, 20.7, 19.9, 19.8, 18.4, 18.3, -2.2, -3.3. HRMS-MALDI: (M + Na<sup>+</sup>) calcd. 884.3765, found 884.3772.

**Dimethylhexylsilyl *O*-(2-*O*-levulinoyl-3-*O*-benzyl-4,6-*O*-benzylidene- $\beta$ -D-glucopyranosyl)-(1 $\rightarrow$ 4)-*O*-2-azido-3-*O*-benzyl-6-*O*-acetyl-2-deoxy- $\beta$ -D-glucopyranoside (38):** Glycosyl donor **4** (25 mg, 0.056 mmol) was coupled with acceptor **5** (22.5 mg, 0.047 mmol) according to the general glycosylation procedure for synthesis of disaccharides to give disaccharide **38** (30 mg, 75%).  $[\alpha]_D^{25}$  -86.3 ( $c = 0.22$ ,  $\text{CHCl}_3$ );  $^1\text{H NMR}$  (500 MHz,  $\text{CDCl}_3$ ):  $\delta$  7.45-7.25 (m, 15H, CH Aromatic), 5.48 (s, 1H, CH benzylidene), 5.00 (t, 1H,  $J = 9.0$  Hz,  $\text{H}2^{\text{B}}$ ), 4.88-4.84 (m, 2H, CHHBn, CHHBn), 4.76 (d, 1H,  $J = 12.0$  Hz, CHHBn), 4.64 (d, 1H,  $J = 11.0$  Hz, CHHBn), 4.53 (d, 1H,  $J = 8.0$  Hz,  $\text{H}1^{\text{B}}$ ), 4.47 (d, 1H,  $J = 7.5$  Hz,  $\text{H}1^{\text{A}}$ ), 4.41 (dd, 1H,  $J = 4.0$  Hz,  $J = 10.0$  Hz,  $\text{H}6^{\text{A}}$ ), 4.14-4.09 (m, 2H,  $\text{H}6^{\text{A}}$ ,  $\text{H}6^{\text{B}}$ ), 3.73-3.68 (m, 2H,  $\text{H}3^{\text{B}}$ ,  $\text{H}4^{\text{A}}$ ), 3.57-3.55 (m, 1H,  $\text{H}5^{\text{A}}$ ), 3.43 (t, 1H,  $J = 10.0$  Hz,  $\text{H}5^{\text{B}}$ ), 3.34 (t, 1H,  $J = 9.5$  Hz,  $\text{H}4^{\text{B}}$ ), 3.31-3.27 (m, 2H,  $\text{H}2^{\text{A}}$ ,  $\text{H}3^{\text{A}}$ ), 2.81-2.74 (m, 1H, CHH Lev), 2.65-2.55 (m, 2H,  $\text{CH}_2$  Lev), 2.40-2.34 (m, 1H, CHH Lev), 2.16 (s, 3H,  $\text{CH}_3$  Lev), 2.06 (s, 3H,  $\text{CH}_3\text{Ac}$ ), 1.66-1.54 [m, 1H,  $\text{CH}(\text{CH}_3)_2$ ], 0.88-0.86 [4s, 12H,  $\text{C}(\text{CH}_3)_2$  and  $\text{CH}(\text{CH}_3)_2$ ], 0.17-0.16 [2s, 6H, Si ( $\text{CH}_3$ ) $_2$ ].  $^{13}\text{C NMR}$  (75.5 MHz,  $\text{CDCl}_3$ ):  $\delta$  205.9, 171.2, 170.4, 138.4, 138.0, 136.9, 128.9, 128.2, 128.1, 127.7, 127.5, 127.5, 127.4, 125.9, 101.4, 101.1, 96.6, 81.3, 80.7, 78.6, 78.0, 77.4, 77.0, 76.6, 75.1, 74.2, 73.4, 72.6, 68.4, 68.3, 66.2, 62.4, 37.5, 33.8, 29.7, 27.6, 24.7, 20.7, 19.9, 19.8, 18.4, 18.3, -2.2, -3.3. HRMS-MALDI: ( $\text{M} + \text{Na}^+$ ) calcd. 940.4022, found 940.5577.

**Dimethylhexylsilyl *O*-(2-*O*-acetyl-3-*O*-benzyl-4,6-*O*-benzylidene- $\beta$ -D-glucopyranosyl)-(1 $\rightarrow$ 4)-*O*-2-azido-3-*O*-benzyl-6-*O*-levulinoyl-2-deoxy- $\beta$ -D-glucopyranoside (39):** Glycosyl donor **3** (2.2 g, 5.15 mmol) was coupled with acceptor **6** (2.3 g, 4.29 mmol) according to the general glycosylation procedure for synthesis of disaccharides to give disaccharide **39** (3.65 g,,

3.97 mmol, 92%).  $[\alpha]_D^{25} +4.8$  ( $c = 1.00$ ,  $\text{CHCl}_3$ );  $^1\text{H NMR}$  (500 MHz,  $\text{CDCl}_3$ ):  $\delta$  7.45-7.25 (m, 15H, CH Aromatic), 5.48 (s, 1H, CH benzyldiene), 5.00 (t, 1H,  $J = 8.0$  Hz,  $\text{H2}^{\text{B}}$ ), 4.89 (d, 1H,  $J = 11.0$  Hz, CHHBn), 4.85 (d, 1H,  $J = 12.0$  Hz, CHHBn), 4.76 (d, 1H,  $J = 10.5$  Hz, CHHBn), 4.63 (d, 1H,  $J = 11.0$  Hz, CHHBn), 4.60 (d, 1H,  $J = 8.0$  Hz,  $\text{H1}^{\text{B}}$ ), 4.46 (d, 1H,  $J = 7.0$  Hz,  $\text{H1}^{\text{A}}$ ), 4.37 (dd, 1H,  $J = 1.5$  Hz,  $J = 11.5$  Hz,  $\text{H6a}^{\text{A}}$ ), 4.14-4.08 (m, 2H,  $\text{H6a}^{\text{B}}$ ,  $\text{H6b}^{\text{A}}$ ), 3.78 (t, 1H,  $J = 9.5$  Hz,  $\text{H3}^{\text{B}}$ ), 3.74-3.66 (m, 3H,  $\text{H4}^{\text{A}}$ ,  $\text{H5}^{\text{B}}$ ,  $\text{H4}^{\text{B}}$ ), 3.42-3.40 (m, 2H,  $\text{H6b}^{\text{B}}$ ,  $\text{H5}^{\text{A}}$ ), 3.35-3.26 (m, 2H,  $\text{H2}^{\text{A}}$ ,  $\text{H3}^{\text{A}}$ ), 2.82-2.67 (m, 2H,  $\text{CH}_2$  Lev), 2.62-2.51 (m, 2H,  $\text{CH}_2$  Lev), 2.17 (s, 3H,  $\text{CH}_3$  Lev), 2.00 (s, 3H,  $\text{CH}_3$  Ac), 1.67-1.61 [m, 1H,  $\text{CH}(\text{CH}_3)_2$ ], 0.88-0.86 [4s, 12H,  $\text{C}(\text{CH}_3)_2$  and  $\text{CH}(\text{CH}_3)_2$ ], 0.17-0.16 [2s, 6H,  $\text{Si}(\text{CH}_3)_2$ ].  $^{13}\text{C NMR}$  (75.5 MHz,  $\text{CDCl}_3$ ):  $\delta$  206.1, 172.3, 169.4, 138.4, 138.2, 137.1, 129.0, 128.3, 128.2, 127.6, 127.6, 127.5, 126.0, 101.5, 101.1, 96.7, 81.5, 80.8, 78.7, 77.9, 77.4, 77.0, 76.6, 75.2, 74.3, 73.3, 72.8, 66.1, 62.4, 37.8, 33.9, 29.8, 29.7, 27.8, 24.8, 20.8, 19.9, 19.8, 18.4, 18.3, -2.1, -3.2. HRMS-MALDI: ( $\text{M} + \text{Na}^+$ ) calcd. 940.4029, found 940.5577.

**Dimethylthexylsilyl *O*-(2-*O*-levulinoyl-3-*O*-benzyl-4,6-*O*-benzyldiene- $\beta$ -D-glucopyranosyl)-(1 $\rightarrow$ 4)-*O*-2-azido-3-*O*-benzyl-6-*O*-levulinoyl-2-deoxy- $\beta$ -D-glucopyranoside (40):** Glycosyl donor **4** (101.1 mg, 0.202 mmol) was coupled with acceptor **6** (90.0 mg, 0.168 mmol) according to the general glycosylation procedure for synthesis of disaccharides to give disaccharide **40** (100 mg, 75%).  $[\alpha]_D^{25} -6.0$  ( $c = 1.00$ ,  $\text{CHCl}_3$ );  $^1\text{H NMR}$  (500 MHz,  $\text{CDCl}_3$ ):  $\delta$  7.45-7.25 (m, 15H, CH Aromatic), 5.48 (s, 1H, CH benzyldiene), 5.01 (t, 1H,  $J = 8.5$  Hz,  $\text{H2}^{\text{B}}$ ), 4.90 (d, 1H,  $J = 11.0$  Hz, CHHBn), 4.85 (d, 1H,  $J = 12.0$  Hz, CHHBn), 4.74 (d, 1H,  $J = 10.5$  Hz, CHHBn), 4.63 (d, 1H,  $J = 13.0$  Hz, CHHBn), 4.62 (d, 1H,  $J = 8.5$  Hz,  $\text{H1}^{\text{B}}$ ), 4.49 (d, 1H,  $J = 7.5$  Hz,  $\text{H1}^{\text{A}}$ ), 4.41 (dd, 1H,  $J = 1.5$  Hz,  $J = 12.0$  Hz,  $\text{H6a}^{\text{A}}$ ), 4.22 (dd, 1H,  $J = 5.5$  Hz,  $J = 11.5$  Hz,  $\text{H6b}^{\text{A}}$ ), 4.14-4.12 (m, 1H,



H6a<sup>B</sup>), 3.82 (t, 1H,  $J = 9.0$  Hz, H3<sup>B</sup>), 3.76 (t, 1H,  $J = 9.0$  Hz, H4<sup>A</sup>), 3.69-3.66 (m, 2H, H4<sup>B</sup>, H6b<sup>B</sup>) 3.59-3.56 (m, 1H, H5<sup>A</sup>), 3.48-3.40 (m, 1H, H5<sup>B</sup>), 3.35 (t, 1H,  $J = 10.0$  Hz, H2<sup>A</sup>), 3.30-3.27 (m, 1H, H3<sup>A</sup>), 2.84-2.50 (m, 5H, 2x CH<sub>2</sub> Lev and CHH Lev) 2.40-2.32 (m, 1H, CHH Lev), 2.17 (s, 3H, CH<sub>3</sub> Lev), 2.16 (s, 3H, CH<sub>3</sub> Lev), 1.69-1.62-1.55 [m, 1H, CH(CH<sub>3</sub>)<sub>2</sub>], 0.89-0.86 [4s, 12H, C(CH<sub>3</sub>)<sub>2</sub> and CH(CH<sub>3</sub>)<sub>2</sub>], 0.17-0.16 [2s, 6H, Si (CH<sub>3</sub>)<sub>2</sub>]. <sup>13</sup>C NMR (75.5 MHz, CDCl<sub>3</sub>): δ 172.6, 171.6, 138.7, 138.5, 137.4, 129.2, 128.4, 128.4, 127.9, 127.8, 127.7, 126.2, 101.6, 101.4, 96.9, 81.8, 81.0, 79.0, 78.1, 77.6, 77.2, 76.8, 75.5, 74.5, 73.8, 72.9, 66.2, 62.9, 38.0, 37.8, 34.1, 30.0, 30.0, 28.1, 27.9, 20.13, 20.1, 18.7, 18.6. HRMS-MALDI: (M + Na<sup>+</sup>) calcd. 996.4290, found 996.5958.

**Dimethylhexylsilyl *O*-(2-*O*-acetyl-3-*O*-benzyl-4,6-*O*-benzylidene- $\alpha$ -L-idopyranosyl)-(1 $\rightarrow$ 4)-*O*-2-azido-3-*O*-benzyl-6-*O*-acetyl-2-deoxy- $\beta$ -D-glucopyranoside (49):** Glycosyl donor **1** (110.6 mg, 0.249 mmol) was coupled with the acceptor **5** (100 mg, 0.208 mmol) according to the general glycosylation procedure for synthesis of disaccharides to give disaccharide **49** (162 mg, 90%). [ $\alpha$ ]<sub>D</sub><sup>25</sup> -6.8 ( $c = 1.00$ , CHCl<sub>3</sub>); <sup>1</sup>H NMR (500 MHz, CDCl<sub>3</sub>): δ 7.44-7.25 (m, 15H, CH Aromatic), 5.30 (s, 1H, CH benzylidene), 4.98 (bs, 2H, H2<sup>B</sup>, H1<sup>B</sup>), 4.85 (d, 1H,  $J = 11.0$  Hz, CHHBn), 4.74 (d, 1H,  $J = 11.5$  Hz, CHHBn), 4.65 (d, 1H,  $J = 12.0$  Hz, CHHBn), 4.55 (d, 1H,  $J = 12.0$  Hz, CHHBn), 4.53 (m, 2H, H1<sup>A</sup>, H6a<sup>A</sup>), 4.05 (dd, 1H,  $J = 5.5$  Hz,  $J = 12.0$  Hz, H6b<sup>A</sup>), 3.90 (bs, 1H, H5<sup>B</sup>), 3.84-3.78 (m, 3H, H4<sup>A</sup>, H4<sup>B</sup>, H6a<sup>B</sup>), 3.72-3.70 (m, 1H, H3<sup>B</sup>), 3.49-3.45 (m, 1H, H5<sup>A</sup>), 3.37-3.35 (m, 1H, H2<sup>A</sup>), 3.24 (t, 1H,  $J = 9.5$  Hz, H3<sup>A</sup>), 3.18 (dd, 1H,  $J = 2.0$  Hz,  $J = 13.0$  Hz, H6b<sup>B</sup>), 2.06 (s, 3H, CH<sub>3</sub> Ac), 2.05 (s 3H, CH<sub>3</sub> Ac), 1.67-1.54 [m, 1H, CH(CH<sub>3</sub>)<sub>2</sub>], 0.90-0.88 [4s, 12H, C(CH<sub>3</sub>)<sub>2</sub> and CH(CH<sub>3</sub>)<sub>2</sub>], 0.19-0.17 [2s, 6H, Si (CH<sub>3</sub>)<sub>2</sub>]. <sup>13</sup>C NMR (75.5 MHz, CDCl<sub>3</sub>): δ 170.4, 170.2, 138.1, 137.9, 137.6, 128.9, 128.4, 128.3, 128.0, 127.9, 127.9, 127.6,

127.4, 127.1, 126.1, 100.4, 98.0, 97.0, 81.2, 77.4, 77.0, 76.5, 75.0, 74.9, 73.8, 73.7, 73.5, 72.1, 69.0, 69.0, 67.1, 62.3, 60.3, 33.9, 24.8, 20.9, 20.8, 19.9, 19.8, 18.4, 18.3, -2.1, -3.3. HRMS-MALDI: (M + Na<sup>+</sup>) calcd. 884.3765, found 884.5333.

**Dimethylhexylsilyl O-(2-O-levulinoyl-3-O-benzyl-4,6-O-benzylidene- $\alpha$ -L-idopyranosyl)-(1 $\rightarrow$ 4)-O-2-azido-3-O-benzyl-6-O-acetyl-2-deoxy- $\beta$ -D-glucopyranoside (50):** Glycosyl donor **2** (124.6 mg, 0.249 mmol) was coupled with acceptor **5** (100 mg, 0.208 mmol) according to the general glycosylation procedure for synthesis of disaccharides to give disaccharide **50** (170 mg, 66%) [ $\alpha$ ]<sub>D</sub><sup>25</sup> -12.0 (*c* = 1.00, CHCl<sub>3</sub>); <sup>1</sup>H NMR (500 MHz, CDCl<sub>3</sub>):  $\delta$  7.45-7.254 (m, 15H, CH Aromatic), 5.30 (s, 1H, CH benzylidene), 4.97 (bd, 2H, *J* = 14.5 Hz, H2<sup>B</sup>, H1<sup>B</sup>), 4.83 (d, 1H, *J* = 11.0 Hz, CHHBn), 4.74 (d, 1H, *J* = 12.0 Hz, CHHBn), 4.63 (d, 1H, *J* = 11.5 Hz, CHHBn), 4.55-4.49 (m, H, H1<sup>A</sup>, H6a<sup>A</sup>, CHHBn), 4.08 (dd, 1H, *J* = 5.0 Hz, *J* = 11.5 Hz, H6b<sup>A</sup>), 3.89 (bs, 1H, H5<sup>B</sup>), 3.84-3.79 (m, 3H, H4<sup>A</sup>, H4<sup>B</sup>, H6a<sup>B</sup>), 3.68 (bs, 1H, H3<sup>B</sup>), 3.49-3.45 (m, 1H, H5<sup>A</sup>), 3.36 (t, 1H, *J* = 10.0 Hz, H2<sup>A</sup>), 3.24 (t, 1H, *J* = 9.5 Hz, H3<sup>A</sup>), 3.17 (d, 1H, *J* = 13.0 Hz, H6b<sup>B</sup>), 2.64-2.62 (m, 2H, CH<sub>2</sub> Lev), 2.56-2.52 (m, 2H, CH<sub>2</sub> Lev), 2.06 (s, 3H, CH<sub>3</sub> Lev), 2.02 (s, 3H, CH<sub>3</sub> Ac), 1.67-1.54 [m, 1H, CH(CH<sub>3</sub>)<sub>2</sub>], 0.90-0.88 [4s, 12H, C(CH<sub>3</sub>)<sub>2</sub> and CH(CH<sub>3</sub>)<sub>2</sub>], 0.19-0.17 [2s, 6H, Si (CH<sub>3</sub>)<sub>2</sub>]. <sup>13</sup>C NMR (75.5 MHz, CDCl<sub>3</sub>):  $\delta$  206.2, 171.8, 170.5, 138.1, 137.9, 137.6, 128.9, 128.4, 128.3, 128.1, 127.9, 127.6, 127.4, 126.1, 100.4, 97.9, 97.0, 81.2, 77.4, 77.0, 76.6, 75.0, 75.0, 73.9, 73.7, 73.5, 72.1, 69.1, 69.0, 67.1, 62.3, 60.3, 37.7, 33.9, 29.6, 28.1, 24.8, 20.8, 19.9, 19.8, 18.4, 18.3, -2.1, -3.2. HRMS-MALDI: (M + Na<sup>+</sup>) calcd. 940.4022, found 940.5577.

**Dimethylhexylsilyl O-(2-O-acetyl-3-O-benzyl-4,6-O-benzylidene- $\alpha$ -L-idopyranosyl)-(1 $\rightarrow$ 4)-O-2-azido-3-O-benzyl-6-O-levulinoyl-2-deoxy- $\beta$ -D-glucopyranoside (51):** Glycosyl donor **1**

(100 mg, 0.22 mmol) was coupled with the acceptor **6** (96.4 mg, 0.18 mmol) according to the general reacted procedure for synthesis of disaccharides to give disaccharide **51** (156.9 mg, 95%).  $[\alpha]_D^{25} +21.0$  ( $c = 1.00$ ,  $\text{CHCl}_3$ );  $^1\text{H NMR}$  (500 MHz,  $\text{CDCl}_3$ ):  $\delta$  7.26-7.06 (m, 15H, CH Aromatic), 5.12 (s, 1H, CH benzylidene), 4.80-4.79 (m, 1H,  $\text{H}2^{\text{B}}$ ), 4.77 (s, 1H,  $\text{H}1^{\text{B}}$ ), 4.65 (d, 1H,  $J = 10.5$  Hz,  $\text{CHHBn}$ ), 4.57 (d, 1H,  $J = 11.5$  Hz,  $\text{CHHBn}$ ), 4.47 (d, 1H,  $J = 11.5$  Hz,  $\text{CHHBn}$ ), 4.37 (d, 2H,  $J = 11.0$  Hz,  $\text{H}6^{\text{A}}$ ,  $\text{CHHBn}$ ), 4.34 (d, 1H,  $J = 7.5$  Hz,  $\text{H}1^{\text{A}}$ ), 3.86 (dd, 1H,  $J = 6.0$  Hz,  $J = 12.0$  Hz,  $\text{H}6^{\text{A}}$ ), 3.73 (bs, 1H,  $\text{H}5^{\text{B}}$ ), 3.65-3.3.60 (m, 3H,  $\text{H}4^{\text{A}}$ ,  $\text{H}4^{\text{B}}$ ,  $\text{H}6^{\text{B}}$ ), 3.68 (bt, 1H,  $J = 3.0$  Hz,  $\text{H}3^{\text{B}}$ ), 3.30-3.28 (m, 1H,  $\text{H}5^{\text{A}}$ ), 3.36 (t, 1H,  $J = 7.5$  Hz,  $\text{H}2^{\text{A}}$ ), 3.02 (t, 1H,  $J = 9.5$  Hz,  $\text{H}3^{\text{A}}$ ), 3.00 (d,  $J = 13.0$  Hz, 1H,  $\text{H}6^{\text{B}}$ ), 2.58-2.54 (m, 2H,  $\text{CH}_2$  Lev), 2.42-2.39 (m, 2H,  $\text{CH}_2$  Lev), 1.98 (s, 3H,  $\text{CH}_3$  Lev), 1.88 (s, 3H,  $\text{CH}_3$  Ac), 1.49-1.45 [m, 1H,  $\text{CH}(\text{CH}_3)_2$ ], 0.72-0.70 [4s, 12H,  $\text{C}(\text{CH}_3)_2$  and  $\text{CH}(\text{CH}_3)_2$ ], 0.018-0.00 [2s, 6H, Si  $(\text{CH}_3)_2$ ].  $^{13}\text{C NMR}$  (75.5 MHz,  $\text{CDCl}_3$ ):  $\delta$  206.3, 172.1, 170.2, 138.1, 138.0, 137.6, 129.1, 128.9, 128.4, 128.4, 128.3, 128.0, 127.9, 127.6, 127.4, 126.1, 100.5, 97.9, 97.0, 81.2, 77.4, 77.0, 76.6, 75.0, 74.9, 73.8, 73.5, 73.5, 72.1, 69.1, 69.0, 67.0, 62.6, 60.2, 37.9, 33.9, 29.8, 29.7, 27.9, 24.8, 21.0, 19.9, 19.8, 18.5, 18.4, -2.1, -3.3. HRMS-MALDI: ( $\text{M} + \text{Na}^+$ ) calcd. 940.4029, found 940.5577.

**Dimethylhexylsilyl** ***O*-(2-*O*-levulinoyl-3-*O*-benzyl-4,6-*O*-benzylidene- $\alpha$ -L-idopyranosyluronate)-(1 $\rightarrow$ 4)-*O*-2-azido-3-*O*-benzyl-6-*O*-levulinoyl-2-deoxy- $\beta$ -D-**

**glucopyranoside (52)**: Glycosyl donor **2** (140 mg, 0.280 mmol) was coupled with acceptor **6** (140 mg, 0.260 mmol) according to the general glycosylation procedure for synthesis of disaccharides to give disaccharide **52** (200 mg, 80%).  $[\alpha]_D^{25} -11.2$  ( $c = 1.00$ ,  $\text{CHCl}_3$ );  $^1\text{H NMR}$  (500 MHz,  $\text{CDCl}_3$ ):  $\delta$  7.44-7.25 (m, 15H, CH Aromatic), 5.30 (s, 1H, CH benzylidene), 4.98-4.97 (m, 1H,  $\text{H}2^{\text{B}}$ ), 4.92 (bs, 1H,  $\text{H}1^{\text{B}}$ ), 4.82 (d, 1H,  $J = 11.0$  Hz,  $\text{CHHBn}$ ), 4.74 (d, 1H,  $J = 11.5$  Hz,

CHHBn), 4.63 (d, 1H,  $J = 11.5$  Hz, CHHBn), 4.55-4.51 (m, 3H, H1<sup>A</sup>, H6a<sup>A</sup>, CHHBn), 4.07 (dd, 1H,  $J = 5.5$  Hz,  $J = 12.0$  Hz, H6b<sup>A</sup>), 3.89 (bs, 1H, H5<sup>B</sup>), 3.84-3.79 (m, 3H, H4<sup>A</sup>, H4<sup>B</sup>, H6a<sup>B</sup>), 3.68 (bt, 1H,  $J = 3.0$  Hz, H3<sup>B</sup>), 3.49-3.45 (m, 1H, H5<sup>A</sup>), 3.38-3.34 (m, 1H, H2<sup>A</sup>), 3.23 (t, 1H,  $J = 9.0$  Hz, H3<sup>A</sup>), 3.18 (dd, 1H,  $J = 1.5$  Hz,  $J = 12.5$  Hz, H6b<sup>B</sup>), 2.78-2.68 (m, 2H, CH<sub>2</sub> Lev), 2.66-2.60 (m, 2H, CH<sub>2</sub> Lev), 2.58-2.51 (m, 4H, 2 x CH<sub>2</sub> Lev), 2.17 (s, 3H, CH<sub>3</sub> Lev), 2.01 (s, 3H, CH<sub>3</sub> Lev), 1.67-1.54 [m, 1H, CH(CH<sub>3</sub>)<sub>2</sub>], 0.90-0.88 [4s, 12H, C(CH<sub>3</sub>)<sub>2</sub> and CH(CH<sub>3</sub>)<sub>2</sub>], 0.19-0.17 [2s, 6H, Si (CH<sub>3</sub>)<sub>2</sub>]. <sup>13</sup>C NMR (75.5 MHz, CDCl<sub>3</sub>): δ 206.7, 206.3, 172.1, 171.9, 138.1, 138.0, 137.6, 128.9, 128.3, 128.2, 128.0, 127.9, 127.9, 127.6, 127.4, 126.6, 100.4, 97.8, 96.9, 81.2, 77.4, 77.0, 76.5, 75.0, 74.9, 73.9, 73.4, 73.4, 72.1, 69.0, 69.0, 67.0, 62.5, 60.2, 37.9, 37.7, 33.9, 29.7, 29.6, 28.1, 27.9, 24.7, 19.9, 19.8, 18.4, 18.3, -2.1, -3.2. HRMS-MALDI: (M + Na<sup>+</sup>) calcd. 996.4290, found 996.5962.

***N*-(Benzyl)-benzyloxycarbonyl-5-aminopentyl *O*-(2-*O*-acetyl-3-*O*-benzyl-4,6-*O*-benzylidene-β-D-glucopyranosyl)-(1→4)-*O*-2-azido-3-*O*-benzyl-6-*O*-acetyl-2-deoxy-α-D-**

**glucopyranoside (S1):** Glycosyl donor **3** (82.1 mg, 0.185 mmol) was coupled with acceptor **7** (100 mg, 0.154 mmol) according to the general glycosylation procedure for synthesis of disaccharides to give disaccharide **S1** (120 mg, 75%). [ $\alpha$ ]<sub>D</sub><sup>25</sup> +53.4 ( $c = 1.00$ , CHCl<sub>3</sub>); <sup>1</sup>H NMR (500 MHz, CDCl<sub>3</sub>): δ 7.44-7.24(m, 20H, CH Aromatic), 5.47 (s, 1H, CH benzylidene), 5.17 (bd, 2H,  $J = 17.5$  Hz, CH<sub>2</sub> Cbz), 5.03 (t, 1H,  $J = 8.5$  Hz, H2<sup>B</sup>), 4.96 (d, 1H,  $J = 10.5$  Hz, CHHBn), 4.86 (d, 1H,  $J = 12.0$  Hz, CHHBn), 4.81-4.75 (bd, 2H, H1<sup>A</sup>, CHHBn), 4.63 (d, 1H,  $J = 12.0$  Hz, CHHBn), 4.51 (bd, 3H,  $J = 8.0$  Hz, H1<sup>B</sup> and NCH<sub>2</sub>Bn), 4.39 (d, 1H,  $J = 11.5$  Hz, H6a<sup>A</sup>), 4.13 (bd, 1H,  $J = 11.5$  Hz, H6b<sup>A</sup>), 4.06 (dd, 1H,  $J = 4.5$  Hz,  $J = 10.0$  Hz, H6a<sup>B</sup>), 3.89 (t, 1H,  $J = 9.5$  Hz, H4<sup>A</sup>), 3.75-3.74 (m, 2H, H5<sup>A</sup>, OCHH Linker), 3.68 (t, 2H,  $J = 5.0$  Hz, H3<sup>B</sup>, H4<sup>B</sup>), 3.65-3.34

(m, 1H, OCHH Linker), 3.44-3.22 (m, 6H, H2<sup>A</sup>, H5<sup>B</sup>, H3<sup>A</sup>, H6b<sup>B</sup>, CH<sub>2</sub>N Linker), 2.07 (s, 3H, CH<sub>3</sub> Ac), 2.00 (s, 3H, CH<sub>3</sub> Ac), 1.66-1.24 (m, 6H, 3 x CH<sub>2</sub> Linker). <sup>13</sup>C NMR (75.5 MHz, CDCl<sub>3</sub>): δ 170.4, 169.3, 138.4, 138.0, 137.9, 137.0, 129.1, 128.5, 128.4, 128.3, 128.3, 127.8, 127.7, 127.6, 127.4, 125.9, 101.6, 101.1, 97.5, 81.4, 78.7, 78.4, 77.8, 77.4, 77.0, 76.6, 75.0, 74.3, 73.2, 68.8, 68.3, 67.2, 66.3, 62.9, 62.1, 50.6, 50.2, 47.0, 46.1, 29.7, 28.9, 27.9, 23.3, 22.7, 20.8, 20.8. HRMS-MALDI: (M + Na<sup>+</sup>) calcd. 1051.4316, found 1051.6359.

***N*-(Benzyl)-benzyloxycarbonyl-5-aminopentyl**      ***O*-(2-*O*-levulinoyl-3-*O*-benzyl-4,6-*O*-benzylidene-β-*D*-glucopyranosyl)-(1→4)-*O*-2-azido-3-*O*-benzyl-6-*O*-acetyl-2-deoxy-α-*D*-glucopyranoside (S2):** Glycosyl donor **4** (92.61 mg, 0.185 mmol) was coupled with acceptor **7** (100 mg, 0.154 mmol) according to the general glycosylation procedure for synthesis of disaccharides to obtain disaccharide **S2** (160 mg, 95%). [α]<sub>D</sub><sup>25</sup> +50.1 (*c* = 1.00, CHCl<sub>3</sub>); <sup>1</sup>H NMR (500 MHz, CDCl<sub>3</sub>): δ 7.44-7.24 (m, 25H, CH Aromatic), 5.47 (s, 1H, CH benzylidene), 5.17 (bd, 2H, *J* = 17.0 Hz, CH<sub>2</sub>Cbz), 5.04 (t, 1H, *J* = 8.5 Hz, H2<sup>B</sup>), 4.96 (d, 1H, *J* = 10.5 Hz, CHHBn), 4.86 (d, 1H, *J* = 12.0 Hz, CHHBn), 4.81 (bd, 2H, *J* = 12.0 Hz, H1<sup>A</sup>), 4.75 (d, 1H, *J* = 10.5 Hz, CHHBn), 4.64 (d, 1H, *J* = 12.0 Hz, CHHBn), 4.52- 4.49 (m, 3H, H1<sup>B</sup>, NCH<sub>2</sub>Bn), 4.39 (dd, 1H, *J* = 1.5 Hz, *J* = 12.0 Hz, H6a<sup>A</sup>), 4.29 (dd, 1H, *J* = 4.0 Hz, *J* = 10.5 Hz, H6b<sup>A</sup>), 4.10 (dd, 1H, *J* = 4.5 Hz, *J* = 10.5 Hz, H6b<sup>B</sup>), 3.98 (bd, 1H, *J* = 9.5 Hz, H5<sup>A</sup>), 3.92 (t, 1H, *J* = 9.5 Hz, H3<sup>A</sup>), 3.79 (t, 1H, *J* = 9.0 Hz, H4<sup>A</sup>), 3.72-3.66 (m, 3H, H3<sup>B</sup>, H4<sup>B</sup>, OCHH Linker), 3.38-3.21 (m, 6H, H2<sup>A</sup>, H5<sup>B</sup>, H6b<sup>B</sup>, CH<sub>2</sub>N Linker), 2.84-2.78 (m, 1H, CHH Lev), 2.64-2.52 (m, 2H, CH<sub>2</sub> Lev), 2.39-2.30 (m, 1H, CHH Lev), 2.10 (bd, 3H, *J* = 12.5 Hz, CH<sub>3</sub> Lev), 2.08 (s, 3H, CH<sub>3</sub> Ac), 1.70-1.51 (m, 4H, 2 x CH<sub>2</sub> Linker), 1.39-1.25 (m, 2H, CH<sub>2</sub> Linker). <sup>13</sup>C NMR (75.5 MHz, CDCl<sub>3</sub>): δ 205.7, 171.3, 170.6, 156.7, 156.1, 138.4, 138.1, 137.9, 136.9, 129.0, 128.5, 128.4, 128.3, 128.2, 128.2, 127.9,

127.8, 127.7, 127.6, 127.5, 127.5, 127.2, 127.9, 101.5, 101.1, 97.4, 81.4, 78.8, 78.2, 77.7, 77.4, 77.0, 76.5, 75.1, 74.3, 73.4, 68.5, 68.3, 68.3, 68.1, 67.1, 66.2, 62.9, 62.3, 50.5, 50.2, 47.0, 46.1, 37.5, 29.7, 29.6, 28.9, 27.9, 27.6, 27.4, 23.2, 20.9. HRMS-MALDI: (M + Na<sup>+</sup>) calcd. 1084.4682, found 1080.6445.

***N*-(Benzyl)-benzyloxycarbonyl-5-aminopentyl *O*-(2-*O*-acetyl-3-*O*-benzyl-4,6-*O*-benzylidene-β-D-glucopyranosyl)-(1→4)-*O*-2-azido-3-*O*-benzyl-6-*O*-levulinoyl-2-deoxy-α-D-**

**glucopyranoside (S3):** Glycosyl donor **3** (1.51 g, 3.41 mmol) was coupled with acceptor **8** (2.0 g, 2.84 mmol) according to the general glycosylation procedure for synthesis of disaccharides to give disaccharide **S3** (2.65 g, 85%).  $[\alpha]_{\text{D}}^{25} +31.5$  ( $c = 1.00$ , CHCl<sub>3</sub>); <sup>1</sup>H NMR (500 MHz, CDCl<sub>3</sub>): δ 7.47-7.26 (m, 25H, CH Aromatic), 5.48 (s, 1H, CH benzylidene), 5.19 (bd, 2H,  $J = 17.5$  Hz, CH<sub>2</sub> Cbz), 5.05 (t, 1H,  $J = 9.0$  Hz, H2<sup>B</sup>), 5.02 (d, 1H,  $J = 11.0$  Hz, CHHBn), 4.88 (d, 1H,  $J = 12.0$  Hz, CHHBn), 4.81 (bd, 2H,  $J = 13.0$  Hz, H1<sup>A</sup>), 4.75 (d, 1H,  $J = 11.0$  Hz, CHHBn), 4.67 (d, 1H,  $J = 8.0$  Hz, H1<sup>B</sup>), 4.65 (d, 1H,  $J = 12.0$  Hz, CHHBn), 4.51 (bs, 2H, NCH<sub>2</sub>Bn), 4.29 (bs, 2H, H6a<sup>A</sup>), 4.11 (dd, 1H,  $J = 5.0$  Hz,  $J = 10.5$  Hz, H6a<sup>B</sup>), 3.90 (t, 1H,  $J = 9.5$  Hz, H3<sup>A</sup>), 3.87-3.82 (m, 2H, H3<sup>B</sup>, H4<sup>A</sup>), 3.78-3.75 (m, 1H, H5<sup>A</sup>), 3.70 (t, 1H,  $J = 9.5$  Hz, H4<sup>B</sup>), 3.67-3.58 (m, 1H, OCHH Linker), 3.50 (ddd, 1H,  $J = 4.5$  Hz,  $J = 9.5$  Hz,  $J = 14.0$  Hz, H5<sup>B</sup>), 3.44-3.23 [m, 5H, incl. H2<sup>A</sup>: t,  $J = 10.0$  Hz, H6b<sup>B</sup>: dd,  $J = 3.0$  Hz,  $J = 10.0$  Hz, CH<sub>2</sub>N Linker and OCHH Linker], 2.89-2.82 (m, 1H, CHH Lev), 2.73- 2.67 (m, 1H, CHH Lev), 2.64- 2.58 (m, 1H, CHH Lev), 2.54-2.50 (m, 1H, CHH Lev), 2.17 (s, 3H, CH<sub>3</sub> Lev), 2.03 (s, 3H, CH<sub>3</sub> Ac), 1.70-1.46 (m, 4H, 2 x CH<sub>2</sub> Linker), 1.38-1.22 (m, 2H, CH<sub>2</sub> Linker). <sup>13</sup>C NMR (75.5 MHz, CDCl<sub>3</sub>): δ 206.1, 172.4, 169.4, 168.5, 138.4, 138.2, 137.9, 137.2, 136.8, 128.9, 128.5, 128.4, 128.3, 128.2, 128.2, 127.8, 127.6, 127.6, 127.5, 127.4, 127.2, 125.9, 113.9, 101.4, 101.1, 97.5, 81.6, 78.8, 78.1, 77.7,

77.4, 77.0, 76.5, 75.0, 74.3, 73.3, 68.8, 68.4, 67.1, 65.9, 62.8, 62.1, 50.5, 50.2, 37.8, 29.7, 29.7, 29.3, 28.9, 27.8, 27.4, 23.2, 20.8. HRMS-MALDI: (M + Na<sup>+</sup>) calcd. 1084.4682, found 1080.644.

***N*-(Benzyl)-benzyloxycarbonyl-5-aminopentyl                      *O*-(2-*O*-levulinoyl-3-*O*-benzyl-4,6-*O*-benzylidene)-(1→4)-*O*-2-azido-3-*O*-benzyl-6-*O*-levulinoyl-2-deoxy- $\alpha$ -D-glucopyranoside**

**(S4)**: Glycosyl donor **4** (85.1 mg, 0.170 mmol) was coupled with acceptor **8** (100 mg, 0.142 mmol) according to the general glycosylation procedure for synthesis of disaccharides to give disaccharide **S4** (150 mg, 0.131 mmol, 92%).  $[\alpha]_D^{25} +34.9$  ( $c = 1.00$ , CHCl<sub>3</sub>); <sup>1</sup>H NMR (500 MHz, CDCl<sub>3</sub>):  $\delta$  7.44-7.24 (m, 25H, CH Aromatic), 5.47 (s, 1H, CH benzylidene), 5.17 (bd, 2H,  $J = 16.5$  Hz, CH<sub>2</sub> Cbz), 5.06-5.01 (m, 2H, H2<sup>B</sup>, CHHBn), 4.85 (d, 1H,  $J = 12.0$  Hz, CHHBn), 4.81 (bd, 1H,  $J = 11.0$  Hz, H1<sup>A</sup>), 4.73 (d, 1H,  $J = 10.5$  Hz, CHHBn), 4.68 (d, 1H,  $J = 8.0$  Hz, H1<sup>B</sup>), 4.64 (d, 1H,  $J = 12.0$  Hz, CHHBn), 4.49 (bs, 2H, NCH<sub>2</sub>Bn), 4.44 (dd, 1H,  $J = 4.5$  Hz,  $J = 12.5$  Hz, H6a<sup>A</sup>), 4.33 (dd, 1H,  $J = 2.0$  Hz,  $J = 12.5$  Hz, H6b<sup>A</sup>), 4.11 (dd, 1H,  $J = 4.5$  Hz,  $J = 10.0$  Hz, H6b<sup>B</sup>), 4.00 (bd, 1H,  $J = 9.5$  Hz, H5<sup>A</sup>), 3.92 (t,  $J = 9.5$  Hz, 1H, H3<sup>A</sup>), 3.88-3.83 (m, 2H, H4<sup>A</sup>, H3<sup>B</sup>), 3.67 (t, 2H,  $J = 9.5$  Hz, H4<sup>B</sup>, OCHH Linker), 3.54 (ddd, 1H,  $J = 5.0$  Hz,  $J = 10.0$  Hz,  $J = 19.5$  Hz, H5<sup>B</sup>), 3.37-3.21 (m, 5H, incl. : H2<sup>A</sup>: t,  $J = 10.5$  Hz, H6b<sup>B</sup>: dd,  $J = 3.5$  Hz,  $J = 10.5$  Hz), CH<sub>2</sub>N Linker and OCHH Linker), 2.90-2.78 (m, 2H, CH<sub>2</sub> Lev), 2.72-2.46 (m, 5H, 2 x CH<sub>2</sub> Lev and CHH Lev), 2.39-2.30 (m, 1H, CHH Lev), 2.16 (s, 3H, CH<sub>3</sub> Lev), 2.10 (bd, 3H,  $J = 12.0$  Hz, CH<sub>3</sub> Lev), 1.63-1.52 (m, 4H, 2 x CH<sub>2</sub> Linker), 1.35-1.25 (m, 2H, CH<sub>2</sub> Linker). <sup>13</sup>C NMR (75.5 MHz, CDCl<sub>3</sub>):  $\delta$  206.2, 205.8, 172.5, 171.4, 138.5, 138.4, 137.9, 137.2, 136.7, 128.9, 128.5, 128.4, 128.2, 128.2, 127.9, 127.8, 127.6, 127.6, 127.5, 127.2, 126.0, 101.3, 101.1, 97.5, 81.6, 78.9, 78.1, 77.7, 77.4, 77.0, 76.6, 75.1, 74.3, 73.6, 68.5, 68.5, 68.1, 67.1, 65.9, 62.9, 62.5, 50.5,

50.2, 47.0, 46.1, 37.8, 37.6, 29.8, 29.7, 28.9, 27.9, 27.7, 23.9. HRMS-MALDI: (M + Na<sup>+</sup>)  
calcd. 1140.4943, found 1136.6748.

***N*-(Benzyl)-benzyloxycarbonyl-5-aminopentyl *O*-(2-*O*-acetyl-3-*O*-benzyl-4,6-*O*-benzylidene- $\alpha$ -L-idopyranosyl)-(1 $\rightarrow$ 4)-*O*-2-azido-3-*O*-benzyl-6-*O*-acetyl-2-deoxy- $\alpha$ -D-glucopyranoside**

(**S5**): Glycosyl donor **1** (82.1 mg, 0.185 mmol) was coupled with acceptor **7** (100 mg, 0.154 mmol) according to the general glycosylation procedure for synthesis of disaccharides to give disaccharide **S5** (140 mg, 0.135 mmol, 88%).  $[\alpha]_D^{24} +22.7$  ( $c = 1$ , CHCl<sub>3</sub>); <sup>1</sup>H NMR (500 MHz, CDCl<sub>3</sub>):  $\delta$  7.44-7.25 (m, 25H, CH Aromatic), 5.28 (s, 1H, CH benzylidene), 5.17 (bd, 2H,  $J = 15.0$  Hz, CH<sub>2</sub> Cbz), 5.00 (bs, 1H, H2<sup>B</sup>), 4.98 (bs, 1H, H1<sup>B</sup>), 4.86 (bd, 1H,  $J = 12.5$  Hz, H1<sup>A</sup>), 4.80 (d, 1H,  $J = 11.0$  Hz, CHHBn), 4.75 (d, 1H,  $J = 11.5$  Hz, CHHBn), 4.65 (d, 1H,  $J = 11.5$  Hz, CHHBn), 4.62 (d, 1H,  $J = 11.0$  Hz, CHHBn), 4.50 (bd, 2H,  $J = 7.0$  Hz, NCH<sub>2</sub>Bn), 4.46 (dd, 1H,  $J = 12.0$  Hz, H6a<sup>A</sup>), 4.14 (d, 1H,  $J = 12.5$  Hz, H6b<sup>A</sup>), 3.87-3.83 (m, 5H, H5<sup>A</sup>, H3<sup>A</sup>, H4<sup>A</sup>, H4<sup>B</sup>, H5<sup>B</sup>), 3.77 (d, 1H,  $J = 13.0$  Hz, H6a<sup>B</sup>), 3.71 (t, 1H,  $J = 3.0$  Hz, H3<sup>B</sup>), 3.69-3.60 (m, 1H, OCHH Linker), 3.46-3.22 (m, 3H, CH<sub>2</sub>N Linker, OCHH Linker), 3.36 (dd, 1H,  $J = 3.0$  Hz,  $J = 9.5$  Hz, H2<sup>A</sup>), 3.09 (d, 1H,  $J = 11.5$  Hz, H6b<sup>B</sup>), 2.09 (s, 3H, CH<sub>3</sub> Ac), 2.07 (s, 3H, CH<sub>3</sub> Ac), 1.70-1.40 (m, 3 x CH<sub>2</sub> Linker). <sup>13</sup>C NMR (75.5 MHz, CDCl<sub>3</sub>):  $\delta$  170.6, 170.2, 138.0, 137.9, 137.6, 128.9, 128.5, 128.4, 128.3, 128.1, 128.0, 127.8, 127.6, 127.4, 126.1, 100.4, 98.1, 97.5, 78.5, 77.4, 77.0, 76.6, 74.9, 74.6, 74.0, 73.8, 72.0, 69.4, 69.0, 68.2, 67.2, 67.1, 63.6, 62.3, 60.3, 29.7, 29.0, 23.3, 21.0. HRMS-MALDI: (M + Na<sup>+</sup>) calcd. 1051.4316, found 1051.4595.

***N*-(Benzyl)-benzyloxycarbonyl-5-aminopentyl *O*-(2-*O*-levulinoyl-3-*O*-benzyl-4,6-*O*-benzylidene- $\alpha$ -L-idopyranosyl)-(1 $\rightarrow$ 4)-*O*-2-azido-3-*O*-benzyl-6-*O*-acetyl-2-deoxy- $\alpha$ -D-**



**glucopyranoside (S6):** Glycosyl donor **2** (92.6 mg, 0.185 mmol) was coupled with the acceptor **7** (100 mg, 0.154 mmol) according to the general glycosylation procedure for synthesis of disaccharides to give disaccharide **S5** (140 mg, 83%)  $[\alpha]_D^{25} +37.9$  ( $c = 1.00$ ,  $\text{CHCl}_3$ );  $^1\text{H NMR}$  (500 MHz,  $\text{CDCl}_3$ ):  $\delta$  7.44-7.24 (m, 25H, CH Aromatic), 5.29 (s, 1H, CH benzylidene), 5.17 (bd, 2H,  $J = 14.5$  Hz,  $\text{CH}_2$  Cbz), 5.01 (bs, 1H,  $\text{H}2^{\text{B}}$ ), 4.95 (bs, 1H,  $\text{H}1^{\text{B}}$ ), 4.86 (bd, 1H,  $J = 14.0$  Hz,  $\text{H}1^{\text{A}}$ ), 4.79 (d, 1H,  $J = 10.5$  Hz, CHHBn), 4.75 (d, 1H,  $J = 12.0$  Hz, CHHBn), 4.63 (d, 1H,  $J = 11.5$  Hz, CHHBn), 4.60 (d, 1H,  $J = 11.0$  Hz, CHHBn), 4.50 (bd, 2H,  $J = 7.0$  Hz,  $\text{NCH}_2\text{Bn}$ ), 4.45 (dd, 1H,  $J = 12.5$  Hz,  $\text{H}6\text{a}^{\text{A}}$ ), 4.17 (d, 1H,  $J = 12.0$  Hz,  $\text{H}6\text{b}^{\text{A}}$ ), 3.85-3.82 (m, 5H,  $\text{H}5^{\text{A}}$ ,  $\text{H}3^{\text{A}}$ ,  $\text{H}4^{\text{A}}$ ,  $\text{H}4^{\text{B}}$ ,  $\text{H}5^{\text{B}}$ ), 3.77 (d, 1H,  $J = 13.0$  Hz,  $\text{H}6\text{a}^{\text{B}}$ ), 3.69 (t, 1H,  $J = 3.0$  Hz,  $\text{H}3^{\text{B}}$ ), 3.69-3.60 (m, 1H, OCHH Linker), 3.46-3.22 (m, 3H,  $\text{CH}_2\text{N}$  Linker, OCHHLinker), 3.34 (dd, 1H,  $J = 3.0$  Hz,  $J = 9.5$  Hz,  $\text{H}2^{\text{A}}$ ), 3.09 (d, 1H,  $J = 11.5$  Hz,  $\text{H}6\text{b}^{\text{B}}$ ), 2.64-2.59 (m, 2H,  $\text{CH}_2$  Lev), 2.56-2.50 (m, 2H,  $\text{CH}_2$  Lev), 2.07 (s, 3H,  $\text{CH}_3$  Lev), 2.01 (s, 3H,  $\text{CH}_3$  Ac), 1.70-1.40 (m, 3 x  $\text{CH}_2$  Linker).  $^{13}\text{C NMR}$  (75.5 MHz,  $\text{CDCl}_3$ ):  $\delta$  206.7, 171.9, 170.6, 138.1, 138.0, 137.9, 137.6, 128.9, 128.5, 128.4, 128.3, 128.1, 128.0, 128.0, 127.8, 127.6, 127.4, 126.1, 100.4, 98.0, 97.5, 78.5, 77.4, 77.0, 76.6, 74.9, 74.6, 74.0, 73.8, 72.1, 69.3, 69.1, 68.2, 67.1, 67.1, 63.6, 62.3, 60.3, 50.5, 50.2, 37.9, 34.1, 32.1, 29.9, 29.8, 29.2, 28.3, 23.5, 22.9, 21.2, 14.3. HRMS-MALDI: ( $\text{M} + \text{Na}^+$ ) calcd. 1084.4681, found 1080.4642.

***N*-(Benzyl)-benzyloxycarbonyl-5-aminopentyl *O*-(2-*O*-acetyl-3-*O*-benzyl-4,6-*O*-benzylidene- $\alpha$ -L-idopyranosyl)-(1 $\rightarrow$ 4)-*O*-2-azido-3-*O*-benzyl-6-*O*-levulinoyl-2-deoxy- $\alpha$ -D-**

**glucopyranoside (S7):** Glycosyl donor **1** (100 mg, 0.22 mmol) was coupled with acceptor **8** (126.5 mg, 0.18 mmol) according to the general glycosylation procedure for synthesis of disaccharides to give disaccharide **S7** (160 mg, 81%).  $[\alpha]_D^{25} +32.3$  ( $c = 1.00$ ,  $\text{CHCl}_3$ );  $\delta$  7.45-

7.27 (m, 25H, CH Aromatic), 5.30 (s, 1H, CH benzyldiene), 5.19 (bd, 2H,  $J = 16.0$  Hz,  $CH_2$  Cbz), 5.01 (bs, 1H,  $H2^B$ ), 4.97 (s, 1H,  $H1^B$ ), 4.87 (bd, 1H,  $J = 12.5$  Hz,  $H1^A$ ), 4.80 (d, 1H,  $J = 11.0$  Hz,  $CHHBn$ ), 4.77 (d, 1H,  $J = 12.5$  Hz,  $CHHBn$ ), 4.66 (d, 1H,  $J = 11.5$  Hz,  $CHHBn$ ), 4.63 (d, 1H,  $J = 11.0$  Hz,  $CHHBn$ ), 4.52 (bd, 3H,  $J = 11.0$  Hz,  $NCH_2Bn$ ,  $H6a^A$ ), 4.15 (d, 1H,  $J = 11.0$  Hz,  $H6b^A$ ), 3.89-3.78 (m, 5H,  $H5^A$ ,  $H3^A$ ,  $H4^A$ ,  $H4^B$ ,  $H5^B$ ), 3.79 (d, 1H,  $J = 13.0$  Hz,  $H6a^B$ ), 3.73 (t, 1H,  $J = 3.0$  Hz,  $H3^B$ ), 3.69-3.60 (m, 1H,  $OCHH$  Linker), 3.46-3.22 (m, 3H,  $CH_2N$  Linker,  $OCHH$  Linker), 3.36 (dd, 1H,  $J = 3.0$  Hz,  $J = 9.0$  Hz,  $H2^A$ ), 3.13 (d, 1H,  $J = 12.5$  Hz,  $H6b^B$ ), 2.77-2.74 (m, 2H,  $CH_2$  Lev), 2.62-2.60 (m, 2H,  $CH_2$  Lev), 2.15 (s, 3H,  $CH_3$  Lev), 2.08 (s, 3H,  $CH_3$  Ac), 1.70-1.40 (m, 3 x  $CH_2$  Linker).  $^{13}C$  NMR (75.5 MHz,  $CDCl_3$ ):  $\delta$  206.3, 172.2, 170.2, 138.0, 138.0, 137.9, 137.6, 136.8, 128.9, 128.5, 128.3, 128.2, 128.0, 128.0, 127.9, 127.8, 127.6, 127.3, 127.2, 126.1, 100.4, 97.9, 97.4, 78.5, 77.4, 77.0, 76.6, 75.0, 74.8, 74.6, 73.7, 72.0, 70.0, 69.3, 69.0, 68.1, 67.1, 66.9, 63.6, 62.7, 62.4, 60.2, 50.5, 50.2, 47.1, 46.1, 37.8, 29.7, 29.6, 29.0, 27.9, 27.4, 23.3, 20.9. HRMS-MALDI: ( $M + Na^+$ ) calcd. 1084.4681, found 1080.4642.

***N*-(Benzyl)-benzyloxycarbonyl-5-aminopentyl**      ***O*-(2-*O*-levulinoyl-3-*O*-benzyl-4,6-*O*-benzyldiene- $\alpha$ -L-idopyranosyl)-(1 $\rightarrow$ 4)-*O*-2-azido-3-*O*-benzyl-6-*O*-levulinoyl-2-deoxy- $\alpha$ -D-glucopyranoside (**S8**):** Glycosyldonor **2** (100 mg, 0.199 mmol) was coupled with the acceptor **8** (116.6 mg, 0.166 mmol) according to the general glycosylation procedure for synthesis of disaccharides to give disaccharide **S8** (180 mg, 95%).  $[\alpha]_D^{25} +37.3$  ( $c = 1.00$ ,  $CHCl_3$ );  $^1H$  NMR (300 MHz,  $CDCl_3$ ):  $\delta$  7.38-7.16 (m, 25H, CH Aromatic), 5.21 (s, 1H, CH benzyldiene), 5.09 (bs, 2H,  $CH_2$  Cbz), 4.93 (t, 1H,  $J = 2.4$  Hz,  $H2^B$ ), 4.85 (bs, 1H,  $H1^B$ ), 4.79 (bs, 1H,  $H1^A$ ), 4.72 (d, 1H,  $J = 10.8$  Hz,  $CHHBn$ ), 4.70 (d, 1H,  $J = 11.7$  Hz,  $CHHBn$ ), 4.58 (d, 1H,  $J = 11.4$  Hz,  $CHHBn$ ), 4.55 (d, 1H,  $J = 11.1$  Hz,  $CHHBn$ ), 4.43 (t, 3H,  $J = 3.0$  Hz,  $NCH_2Bn$ ,  $H6a^A$ ), 4.15 (d, 1H,  $J =$

12.6 Hz, H6b<sup>A</sup>), 3.78-3.73 (m, 5H, H5<sup>A</sup>, H3<sup>A</sup>, H4<sup>A</sup>, H4<sup>B</sup>, H5<sup>B</sup>), 3.68 (s, 1H, H6a<sup>B</sup>), 3.73 (t, 1H,  $J = 3.0$  Hz, H3<sup>B</sup>), 3.63-3.52 (m, 1H, OCHH Linker), 3.42-3.12 (m, 3H, CH<sub>2</sub>N Linker, OCHH Linker), 3.36 (dd, 1H,  $J = 3.3$  Hz,  $J = 9.3$  Hz, H2<sup>A</sup>), 3.02 (d, 1H,  $J = 11.7$  Hz, H6b<sup>B</sup>), 2.77-2.74 (m, 2H, CH<sub>2</sub> Lev), 2.62-2.60 (m, 2H, CH<sub>2</sub> Lev), 2.15 (s, 3H, CH<sub>3</sub> Lev), 2.08 (s, 3H, CH<sub>3</sub> Ac), 1.70-1.40 (m, 6H, 3 x CH<sub>2</sub> Linker). <sup>13</sup>C NMR (75.5 MHz, CDCl<sub>3</sub>): δ 206.4, 206.3, 172.1, 171.9, 138.0, 138.0, 137.8, 137.6, 136.8, 128.8, 128.5, 128.3, 128.2, 128.0, 127.9, 127.8, 127.8, 127.5, 127.3, 127.2, 126.1, 100.4, 97.7, 97.4, 78.4, 77.4, 77.2, 77.0, 76.5, 74.8, 74.5, 73.7, 73.6, 72.0, 69.3, 69.0, 68.1, 67.1, 66.9, 63.6, 62.4, 60.1, 50.5, 50.2, 47.0, 46.1, 37.8, 37.7, 30.8, 29.7, 29.6, 29.5, 29.0, 28.1, 27.9, 27.4, 23.2. HRMS-MALDI: (M + Na<sup>+</sup>) calcd. 1140.4943, found 1136.6748.

**Dimethylthexylsilyl O-(2-O-acetyl-3-O-benzyl-β-D-glucopyranosyl)-(1→4)-O-2-azido-3-O-benzyl-6-O-levulinoyl-2-deoxy-β-D-glucopyranoside (S9):** Disaccharide **37** (0.427 g, 0.495 mmol) was dissolved in DCM:TFA:H<sub>2</sub>O (0.06 M) (10/1/0.1, v/v) and treated according to the general procedure for benzylidene acetal cleavage to give **S9** (0.290 g, 75%).  $[\alpha]_{\text{D}}^{25} +16.20$  ( $c=1.00$ , CHCl<sub>3</sub>); <sup>1</sup>H NMR (500 MHz, CDCl<sub>3</sub>): δ 7.37-7.25 (m, 10H, CH Aromatic), 4.97 (t, 1H,  $J = 9.5$  Hz, H2<sup>B</sup>), 4.87 (d, 1H,  $J = 10.0$  Hz, CHHBn), 4.78 (d, 1H,  $J = 15.0$  Hz, CHHBn), 4.72 (d, 1H,  $J = 10.0$  Hz, CHHBn), 4.64 (d, 1H,  $J = 10.0$  Hz, CHHBn), 4.58 (d, 1H,  $J = 10.0$  Hz, H1<sup>A</sup>), 4.44 (dd, 1H,  $J = 2.0$  Hz,  $J = 10.0$  Hz, H6a<sup>A</sup>), 4.39 (d, 1H,  $J = 10.0$  Hz, H1<sup>B</sup>), 4.06 (dd, 1H,  $J = 7.0$  Hz,  $J = 12.0$  Hz, H6b<sup>A</sup>), 3.64-3.54 (m, 3H, H4<sup>B</sup>, H4<sup>A</sup>, H6a<sup>B</sup>), 3.48-3.42 (m, 2H, H5<sup>A</sup>, H3<sup>B</sup>), 3.35-3.28 (m, 3H, H2<sup>A</sup>, H3<sup>A</sup>, H6b<sup>B</sup>), 3.20-3.16 (m, 1H, H5<sup>A</sup>), 2.06 (s, 3H, CH<sub>3</sub> Ac), 2.00 (s, 3H, CH<sub>3</sub> Ac), 1.65-1.61 [m, 1H, CH(CH<sub>3</sub>)<sub>2</sub>], 0.88-0.86 [4s, 12H, C(CH<sub>3</sub>)<sub>2</sub> and CH(CH<sub>3</sub>)<sub>2</sub>], 0.17-0.15 [2s, 6H, Si(CH<sub>3</sub>)<sub>2</sub>]. <sup>13</sup>C NMR (75.5 MHz, CDCl<sub>3</sub>): δ 170.5, 169.4, 138.3, 137.9, 128.7, 128.4,

128.1, 127.8, 127.7, 127.1, 101.0, 96.7, 82.8, 80.6, 78.0, 77.4, 77.0, 76.6, 75.4, 75.1, 74.7, 73.3, 72.9, 70.5, 68.5, 62.4, 62.1, 33.9, 24.8, 20.8, 20.8, 19.9, 19.8, 18.4, 18.3, -2.2, -3.3. HRMS-MALDI: (M + Na<sup>+</sup>) calcd. 796.34527, found 796.3431.

**Dimethylhexylsilyl *O*-(2-*O*-levulinoyl-3-*O*-benzyl- $\beta$ -D-glucopyranosyl)-(1 $\rightarrow$ 4)-*O*-2-azido-3-*O*-benzyl-6-*O*-levulinoyl-2-deoxy- $\beta$ -D-glucopyranoside (S10):** Disaccharide **38** (0.255 g, 0.277 mmol) was dissolved in DCM:TFA:H<sub>2</sub>O (0.06 M) (10/1/0.1, v/v) and treated according to the general procedure for benzylidene acetal cleavage to give **S10** (0.20 g, 87%). <sup>1</sup>H NMR (500 MHz, CDCl<sub>3</sub>):  $\delta$  7.36-7.25 (m, 10H, CH Aromatic), 4.97 (t, 1H, *J* = 8.5 Hz, H2<sup>B</sup>), [ $\alpha$ ]<sub>D</sub><sup>25</sup> +27.1 (*c* = 0.024, CHCl<sub>3</sub>); 4.87 (d, 1H, *J* = 11.0 Hz, CHHBn), 4.79 (d, 1H, *J* = 12.0 Hz, CHHBn), 4.76 (d, 1H, *J* = 11.0 Hz, CHHBn), 4.62 (d, 1H, *J* = 11.5 Hz, CHHBn), 4.50-4.48 (m, 2H, H1<sup>A</sup>, H6a<sup>A</sup>), 4.40 (d, 1H, *J* = 7.5 Hz, H1<sup>B</sup>), 4.11 (dd, 1H, *J* = 6.0 Hz, *J* = 12.0 Hz, H6b<sup>A</sup>), 3.61-3.56 (m, 2H, H4<sup>B</sup>, H6a<sup>B</sup>), 3.53 (t, 1H, *J* = 9.0 Hz, H5<sup>A</sup>), 3.47 (t, 1H, *J* = 9.0 Hz, H3<sup>B</sup>), 3.36-3.27 (m, 3H, H2<sup>A</sup>, H3<sup>A</sup>, H6b<sup>B</sup>), 3.20-3.17 (m, 1H, H5<sup>B</sup>), 2.81-2.58 (m, 3H, CH<sub>2</sub> Lev, CHH Lev), 2.47-2.41 (m, 1H, CHH Lev), 2.17 (s, CH<sub>3</sub> Lev), 2.08 (s, 1H, CH<sub>3</sub> Ac), 1.68-1.62 [m, 1H, CH(CH<sub>3</sub>)<sub>2</sub>], 0.89-0.86 [4s, 12H, C(CH<sub>3</sub>)<sub>2</sub> and CH(CH<sub>3</sub>)<sub>2</sub>], 0.18-0.16 [2s, 6H, Si(CH<sub>3</sub>)<sub>2</sub>]. <sup>13</sup>C NMR (75.5 MHz, CDCl<sub>3</sub>):  $\delta$  206.1, 171.5, 170.6, 138.3, 138.1, 128.6, 128.4, 128.0, 127.7, 127.2, 100.9, 96.7, 82.9, 80.7, 77.9, 77.4, 77.0, 76.6, 75.4, 75.2, 74.7, 73.6, 72.7, 70.5, 68.5, 62.6, 62.1, 37.5, 33.9, 29.8, 27.7, 24.8, 20.8, 19.9, 19.8, 18.4, 18.3, -2.1, -3.2. HRMS-MALDI : (M + Na<sup>+</sup>) calcd. 852.3714, found 852.5162.

**Dimethylhexylsilyl *O*-(2-*O*-acetyl-3-*O*-benzyl- $\beta$ -D-glucopyranosyl)-(1 $\rightarrow$ 4)-*O*-2-azido-3-*O*-benzyl-6-*O*-levulinoyl-2-deoxy- $\beta$ -D-glucopyranoside (S11):** Disaccharide **39** (3.65 g, 3.97

mmol) was dissolved in DCM:TFA:H<sub>2</sub>O (10/1/0.1, v/v/v) (0.06 M) and treated according to the general procedure for benzylidene acetal cleavage to give **S11** (2.8 g, 85%).  $[\alpha]_D^{25} +30.6$  ( $c = 1.00$ , CHCl<sub>3</sub>); <sup>1</sup>H NMR (500 MHz, CDCl<sub>3</sub>): δ 7.38-7.26 (m, 10H, CH Aromatic), 4.97 (t, 1H,  $J = 9.0$  Hz, H2<sup>B</sup>), 4.90 (d, 1H,  $J = 11.0$  Hz, CHHBn), 4.77 (d, 1H,  $J = 11.0$  Hz, CHHBn), 4.72 (d, 1H,  $J = 11.5$  Hz, CHHBn), 4.65 (d, 1H,  $J = 11.5$  Hz, CHHBn), 4.47 (d, 1H,  $J = 8.0$  Hz, H1<sup>A</sup>), 4.46 (d, 1H,  $J = 7.0$  Hz, H1<sup>B</sup>), 4.35 (dd, 1H,  $J = 1.5$  Hz,  $J = 11.5$  Hz, H6a<sup>A</sup>), 4.17 (dd, 1H,  $J = 5.0$  Hz,  $J = 11.5$  Hz, H6b<sup>A</sup>), 3.71 (t, 1H,  $J = 9.5$  Hz, H4<sup>B</sup>), 3.64-3.59 (m, 2H, H4<sup>B</sup>, H3<sup>B</sup>), 3.56 (ddd, 1H,  $J = 3.5$  Hz,  $J = 9.0$  Hz,  $J = 18.0$  Hz, H6<sup>B</sup>), 3.45-3.41 (m, 1H, H5<sup>A</sup>), 3.37-3.27 (m, 4H, H2<sup>A</sup>, H3<sup>A</sup>, H6B, H5<sup>B</sup>), 2.85-2.81 (m, 1H, CHH Lev), 2.75-2.67 (m, 1H, CHH Lev), 2.65-2.52 (m, 2H, 2 x CH<sub>2</sub> Lev), 2.06 (s, 3H, CH<sub>3</sub> Ac), 2.19 (s, 3H, CH<sub>3</sub> Lev), 2.04 (s, 3H, CH<sub>3</sub> Ac), 1.65-1.61 [m, 1H, CH(CH<sub>3</sub>)<sub>2</sub>], 0.90-0.87 [4s, 12H, C(CH<sub>3</sub>)<sub>2</sub> and CH(CH<sub>3</sub>)<sub>2</sub>], 0.17-0.16 [2s, 6H, Si (CH<sub>3</sub>)<sub>2</sub>]. <sup>13</sup>C NMR (75.5 MHz, CDCl<sub>3</sub>): δ 206.5, 172.4, 169.5, 138.3, 138.1, 128.6, 128.4, 128.0, 127.8, 127.7, 127.3, 100.8, 96.8, 82.9, 80.6, 77.4, 77.0, 76.6, 75.5, 75.2, 74.6, 73.3, 72.8, 70.8, 68.5, 62.3, 37.7, 33.9, 29.8, 29.7, 27.8, 24.8, 20.9, 19.9, 19.8, 18.5, 18.4, -2.1, -3.2. HRMS-MALDI: (M + Na<sup>+</sup>) calcd. 852.3714, found 852.5162.

**Dimethylthexylsilyl O-(2-O-levulinoyl-3-O-benzyl-β-D-glucopyranosyl)-(1→4)-O-2-azido-3-O-benzyl-6-O-levulinoyl-2-deoxy-β-D-glucopyranoside (S12):** Disaccharide **40** (0.377 g, 0.387 mmol) was dissolved in DCM:TFA:H<sub>2</sub>O (10/1/0.1, v/v) (0.06 M) and treated according to the general procedure for benzylidene acetal cleavage to give **S12** (0.297 g, 87%).  $[\alpha]_D^{25} -9.1$  ( $c = 1.00$ , CHCl<sub>3</sub>); <sup>1</sup>H NMR (500 MHz, CDCl<sub>3</sub>): δ 7.39-7.26 (m, 10H, CH Aromatic), 4.96 (t, 1H,  $J = 8.5$  Hz, H2<sup>B</sup>), 4.90 (d, 1H,  $J = 10.5$  Hz, CHHBn), 4.75 (d, 2H,  $J = 11.5$  Hz, CHHBn and CHHBn), 4.65 (d, 1H,  $J = 12.0$  Hz, CHHBn), 4.489 (t, 2H,  $J = 7.5$  Hz, H1<sup>B</sup> and H1<sup>A</sup>), 4.38, (dd,

1H,  $J = 1.5$  Hz,  $J = 11.5$  Hz, H6a<sup>A</sup>), 4.25 (dd, 1H,  $J = 4.5$  Hz,  $J = 12.0$  Hz, H6b<sup>A</sup>), 3.73 (t, 1H,  $J = 9.5$  Hz, H4<sup>A</sup>), 3.62-3.57 (m, 3H, H3<sup>B</sup>, H5<sup>A</sup>, H6a<sup>B</sup>), 3.51 (t, 1H,  $J = 9.0$  Hz, H4<sup>B</sup>), 3.365-3.271 (m, 4H, H2<sup>A</sup>, H3<sup>A</sup>, H5<sup>B</sup>, H6b<sup>B</sup>), 3.56-3.58 [m, 6H, 3 x CH<sub>2</sub> Lev], 2.43-2.38 (m, 2H, CH<sub>2</sub> Lev), 2.38-2.18 (2s 3H, CH<sub>3</sub> Lev), 1.80-1.62 [m, 1H, CH(CH<sub>3</sub>)<sub>2</sub>], 0.89-0.87 [4s, 12H, C(CH<sub>3</sub>)<sub>2</sub> and CH(CH<sub>3</sub>)<sub>2</sub>], 0.17-0.16 [2s, 6H, Si(CH<sub>3</sub>)<sub>2</sub>]. <sup>13</sup>C NMR (75.5 MHz, CDCl<sub>3</sub>): δ 206.6, 206.1, 172.4, 171.5, 138.4, 138.3, 128.6, 128.3, 127.9, 127.7, 127.3, 100.7, 96.7, 82.9, 80.6, 77.4, 77.0, 76.6, 75.4, 75.2, 74.6, 73.6, 72.6, 70.9, 68.5, 62.7, 62.3, 37.7, 37.6, 33.9, 29.9, 29.8, 27.8, 24.8, 19.9, 19.8, 18.4, 18.4, -2.1, -3.2. HRMS-MALDI: (M + Na<sup>+</sup>) calcd. 908.3977, found 908.5037.

**Dimethylthexylsilyl O-(2-O-acetyl-3-O-benzyl- $\alpha$ -L-idopyranosyl)-(1 $\rightarrow$ 4)-O-2-azido-3-O-benzyl-6-O-acetyl-2-deoxy- $\beta$ -D-glucopyranoside (S13):** Disaccharide **49** (120 mg, 0.131mmol) was dissolved in DCM and treated according to the general procedure for benzylidene acetal cleavage. Silica gel column chromatography of the residue (Toluene/EtOAc, 9/1 $\rightarrow$ 65/35, v/v) afforded **S13** (116 mg, 65%). [ $\alpha$ ]<sub>D</sub><sup>25</sup> -21( $c = 1$ , CHCl<sub>3</sub>); <sup>1</sup>H NMR (500 MHz, CDCl<sub>3</sub>): δ 7.33-7.07 (m, 10H, CH Aromatic), 4.79 (t, 1H,  $J = 1.2$  Hz, H2<sup>B</sup>), 4.70 (bs, 1H, H1<sup>B</sup>), 4.65 (d, 1H,  $J = 10.0$  Hz, CHHBn), 4.61 (d, 1H,  $J = 11.3$  Hz, CHHBn), 4.46(d,  $J = 11.3$ , 1H, CHHBn), 4.39(d,  $J = 7.6$  Hz, 1H, H1<sup>A</sup>), 4.36 (d, 1H,  $J = 10.0$  Hz, CHHBn), 4.33 (dd, 1H,  $J = 2.3$  Hz,  $J = 12.2$  Hz, H6a<sup>A</sup>), 4.10 (bt, 1H,  $J = 5.2$  Hz, H5<sup>B</sup>), 4.97 (dd, 1H,  $J = 5.6$  Hz,  $J = 12.0$  Hz, H6b<sup>A</sup>), 3.67 (t, 1H,  $J = 9.5$  Hz, H4<sup>A</sup>), 3.50 (t, 1H,  $J = 2.6$  Hz, H3<sup>B</sup>), 3.45 (bd, 1H,  $J = 9.6$  Hz, H4<sup>B</sup>), 3.34 (ddd, 1H,  $J = 2.3$  Hz,  $J = 5.4$  Hz,  $J = 9.5$  Hz, H5<sup>A</sup>), 3.22 (dd, 1H,  $J = 7.6$  Hz,  $J = 10.0$  Hz, H2<sup>A</sup>), 3.18 (d, 1H,  $J = 6.0$  Hz,  $J = 12.0$  Hz, H6a<sup>B</sup>), 3.10 (t, 1H,  $J = 9.7$  Hz, H3<sup>A</sup>), 3.05 (m, 1H, H6b<sup>B</sup>), 2.40 (d, 1H,  $J = 9.6$ , OH), 1.94-1.92 (2s, 6H, 2 x CH<sub>3</sub> Ac), 1.52-1.43 [m, 1H, CH(CH<sub>3</sub>)<sub>2</sub>], 0.76-0.73 [4s, 12H, C(CH<sub>3</sub>)<sub>2</sub> and CH(CH<sub>3</sub>)<sub>2</sub>], 0.05-0.03 [2s, 6H, Si(CH<sub>3</sub>)<sub>2</sub>].

$^{13}\text{C}$  NMR (75.5 MHz,  $\text{CDCl}_3$ ):  $\delta$  170.45, 169.48, 137.59, 137.47, 128.5, 128.14, 128.11, 128.03, 127.92, 97.8, 97.04, 81.30, 75.43, 75.09, 73.50, 73.43, 72.24, 69.2, 67.72, 67.50, 67.0, 62.71, 62.37, 33.95, 24.80, 20.99, 20.83, 19.94, 19.83, 18.50, 18.36, -2.21, -3.31. HRMS-MALDI:  $(\text{M} + \text{Na}^+)$  calcd. 796.3447, found 796.3451.

**Dimethylthexylsilyl *O*-(2-*O*-levulinoyl-3-*O*-benzyl- $\alpha$ -L-idopyranosyl)-(1 $\rightarrow$ 4)-*O*-2-azido-3-*O*-benzyl-6-*O*-acetyl-2-deoxy- $\beta$ -D-glucopyranoside (S14):** Disaccharide **50** (170mg, 0.137 mmol) was dissolved in DCM:TFA:H<sub>2</sub>O (10/1/0.1, v/v/v) (0.06 M) and treated according to the general procedure for benzylidene acetal cleavage to give **S14** (71.5 mg, 55%).  $[\alpha]_{\text{D}}^{25} +45.6$  ( $c = 0.8$ ,  $\text{CHCl}_3$ );  $^1\text{H}$  NMR (500 MHz,  $\text{CDCl}_3$ ):  $\delta$  7.25-7.07 (m, 10H, CH Aromatic), 4.79 (t, 1H,  $J = 1.1$  Hz, H2<sup>B</sup>), 4.70 (bs, 1H, H1<sup>B</sup>), 4.64 (d, 1H,  $J = 10.3$  Hz, CHHBn), 4.61 (d, 1H,  $J = 11.3$  Hz, CHHBn), 4.46 (d, 1H,  $J = 11.3$  Hz, CHHBn), 4.39 (d, 1H,  $J = 7.6$  Hz, H1<sup>A</sup>), 4.36 (d, 1H,  $J = 10.3$  Hz, CHHBn), 4.32 (dd, 1H,  $J = 2.3$  Hz,  $J = 12.0$  Hz, H6a<sup>A</sup>), 4.08 (t, 1H,  $J = 5.1$  Hz, H5<sup>B</sup>), 3.96 (dd, 1H,  $J = 5.2$  Hz,  $J = 12.0$  Hz, H6b<sup>A</sup>), 3.70 (t, 1H,  $J = 9.4$  Hz, H4<sup>A</sup>), 3.51 (t, 1H,  $J = 2.4$  Hz, H3<sup>B</sup>), 3.46 (bs, 1H, H4<sup>A</sup>), 3.33 (ddd, 1H,  $J = 2.3$  Hz,  $J = 5.1$  Hz,  $J = 9.5$  Hz, H5<sup>A</sup>), 3.24-3.18 (m, 2H, H2<sup>A</sup>, H6a<sup>B</sup>), 3.10 (t, 1H,  $J = 9.4$  Hz, H3<sup>A</sup>), 3.05-3.04 (m, 1H, H6b<sup>B</sup>), 2.61 (t, 2H, CH<sub>2</sub> Lev), 2.56 (bd, 1H,  $J = 6.4$  Hz, OH), 2.42 (t, 2H, CH<sub>2</sub> Lev), 2.03-1.93 (2s, 6H, CH<sub>3</sub> Ac, CH<sub>3</sub> Lev), 1.52-1.43 [m, 1H, CH(CH<sub>3</sub>)<sub>2</sub>], 0.76-0.74 [4s, 12H, C(CH<sub>3</sub>)<sub>2</sub> and CH(CH<sub>3</sub>)<sub>2</sub>], 0.05-0.03 [2s, 6H, Si(CH<sub>3</sub>)<sub>2</sub>].  $^{13}\text{C}$  NMR (75.5 MHz,  $\text{CDCl}_3$ ):  $\delta$  170.45, 169.48, 137.59, 137.47, 128.5, 128.14, 128.11, 128.03, 127.92, 97.8, 97.04, 81.30, 75.43, 75.09, 73.50, 73.43, 72.24, 69.2, 67.72, 67.50, 67.0, 62.71, 62.37, 33.95, 24.80, 20.99, 20.83, 19.94, 19.83, 18.50, 18.36, -2.21, -3.31. HRMS-MALDI:  $(\text{M} + \text{Na}^+)$  calcd. 852.3714, found 852.5162.

**Dimethylhexylsilyl *O*-(2-*O*-acetyl-3-*O*-benzyl- $\alpha$ -L-idopyranosyl)-(1 $\rightarrow$ 4)-*O*-2-azido-3-*O*-benzyl-6-*O*-levulinoyl-2-deoxy- $\beta$ -D-glucopyranoside (S15):** Disaccharide **51** (120 mg, 0.131mmol) was dissolved in DCM:TFA:H<sub>2</sub>O (10/1/0.1, v/v)(0.06 M) and treated according to the general procedure for benzylidene acetal cleavage to give **S15** (90 mg, 82%).  $[\alpha]_{\text{D}}^{25} +24$  ( $c = 1$ , CHCl<sub>3</sub>): <sup>1</sup>H NMR (500 MHz, CDCl<sub>3</sub>):  $\delta$  7.31-7.15 (m, 10H, CH Aromatic), 4.86 (bs, 1H, H2<sup>B</sup>), 4.74 (s, 1H, H1<sup>B</sup>), 4.71 (d, 1H,  $J = 10.5$  Hz, CHHBn), 4.67 (d, 1H,  $J = 11.0$  Hz, CHHBn), 4.53 (d, 1H,  $J = 11.0$  Hz, CHHBn), 4.47-4.43 (m, 2H, CHHBn, H1<sup>A</sup>), 4.39 (dd, 2H,  $J = 2.0$  Hz,  $J = 12.0$  Hz, H6a<sup>A</sup>), 4.16 (t, 1H,  $J = 2.0$  Hz, H5<sup>B</sup>), 4.06 (dd, 1H,  $J = 5.0$  Hz,  $J = 12.5$  Hz, H6b<sup>A</sup>), 3.78 (t, 1H,  $J = 9.5$  Hz, H4<sup>A</sup>), 3.57 (bs, 1H, H3<sup>B</sup>), 3.57 (bs, 1H, H4<sup>B</sup>), 3.42-3.39 (m, 1H, H5<sup>A</sup>), 3.30-3.26 (m, 2H, H2<sup>A</sup>, H6a<sup>B</sup>), 3.19-3.12 (m, 1H, H3<sup>A</sup>, H6b<sup>B</sup>), 2.68-2.67 (m, 2H, CH<sub>2</sub> Lev), 2.52-2.50 (m, 2H, CH<sub>2</sub> Lev), 2.10 (s, 3H, CH<sub>3</sub> Lev), 2.03 (s, 3H, CH<sub>3</sub> Ac), 1.49-1.45 [m, 1H, CH(CH<sub>3</sub>)<sub>2</sub>], 0.72-0.70 [4s, 12H, C(CH<sub>3</sub>)<sub>2</sub> and CH(CH<sub>3</sub>)<sub>2</sub>], 0.018-0.00 [2s, 6H, Si (CH<sub>3</sub>)<sub>2</sub>]. HRMS-MALDI: (M + Na<sup>+</sup>) calcd. 852.3714, found 852.5162.

**Dimethylhexylsilyl -*O*-(2-*O*-levulinoyl-3-*O*-benzyl- $\alpha$ -L-idopyranosyl)-(1 $\rightarrow$ 4)-*O*-2-azido-3-*O*-benzyl-6-*O*-levulinoyl-2-deoxy- $\beta$ -D-glucopyranoside (S16):** Disaccharide **52** (140 mg, 0.195 mmol) was dissolved in DCM:TFA:H<sub>2</sub>O (10/1/0.1, v/v/v) (0.06 M) and treated according to the general procedure for benzylidene acetal cleavage to give **S16** (50 mg, 30%),  $[\alpha]_{\text{D}}^{25} +24$  ( $c = 1$ , CHCl<sub>3</sub>): <sup>1</sup>H NMR (500 MHz, CDCl<sub>3</sub>):  $\delta$  7.31-7.15 (m, 10H, CH Aromatic), 4.93 (bs, 1H, H2<sup>B</sup>), 4.80 (s, 1H, H1<sup>B</sup>), 4.77-4.43 (m, 2H, CHHBn, CHHBn), 4.59 (d, 1H,  $J = 11.0$  Hz, CHHBn), 4.53-4.49 (m, 2H, CHHBn, H1<sup>A</sup>), 4.45 (dd, 2H,  $J = 2.5$  Hz,  $J = 12.5$  Hz, H6a<sup>A</sup>), 4.20 (t, 1H,  $J = 2.0$  Hz, H5<sup>B</sup>), 4.14 (dd, 1H,  $J = 4.5$  Hz,  $J = 12.5$  Hz, H6b<sup>A</sup>), 3.86 (t, 1H,  $J = 9.5$  Hz, H4<sup>A</sup>), 3.65 (bs, 1H,  $J = 3$  Hz, H3<sup>B</sup>), 3.60 (bs, 1H, H4<sup>B</sup>), 3.48-3.45 (m, 1H, H5<sup>A</sup>), 3.38-3.33 (m,



2H, H2<sup>A</sup>, H6a<sup>B</sup>), 3.25-3.19 (m, 1H, H3<sup>A</sup>, H6b<sup>B</sup>), 2.78-2.71 (m, 2H, CH<sub>2</sub> Lev), 2.65-2.54 (m, 2H, CH<sub>2</sub> Lev), 2.17-2.16 (2s, 6H, 2 x CH<sub>3</sub> Lev), 1.65-1.59[m, 1H, CH(CH<sub>3</sub>)<sub>2</sub>], 0.90-0.87 [4s, 12H, C(CH<sub>3</sub>)<sub>2</sub> and CH(CH<sub>3</sub>)<sub>2</sub>], 0.019-0.018 [2s, 6H, Si (CH<sub>3</sub>)<sub>2</sub>]. <sup>13</sup>C NMR (75.5 MHz, CDCl<sub>3</sub>): δ 206.5, 206.5, 172.0, 171.6, 137.6, 137.5, 128.4, 128.3, 128.1, 128.1, 127.9, 97.4, 97.0, 81.2, 77.4, 77.0, 76.6, 75.4, 75.3, 73.3, 72.9, 72.3, 69.2, 67.8, 67.1, 62.7, 62.5, 37.8, 37.9, 33.9, 29.8, 29.7, 28.0, 27.9, 24.8, 19.9, 19.8, 18.5, 18.4, -2.1, -3.2. HRMS-MALDI: (M + Na<sup>+</sup>) calcd. 908.3977, found 908.5037.

***N*-(Benzyl)-benzyloxycarbonyl-5-aminopentyl**

***O*-(2-*O*-acetyl-3-*O*-benzyl-β-*D*-**

**glucopyranosyl)-(1→4)-*O*-2-azido-3-*O*-benzyl-6-*O*-acetyl-2-deoxy-α-*D*-glucopyranoside**

**(S17)**: Disaccharide **S1** (120 mg, 0.116 mmol) was dissolved in DCM:TFA:H<sub>2</sub>O (10/1/0.1, v/v/v) (0.06M) and treated according to the general procedure for benzylidene acetal cleavage to give **S17** (85 mg, 78%). [α]<sub>D</sub><sup>23</sup> +21.1 (*c* = 1, CHCl<sub>3</sub>); <sup>1</sup>H NMR (500 MHz, CDCl<sub>3</sub>): δ 7.31-7.07 (m, 25H, CH Aromatic), 5.12-5.1 (bd, 2H, *J* = 17.5 Hz, CH<sub>2</sub> Cbz), 4.94-4.88 (m, 2H, H2<sup>B</sup>, CHHBn), 4.66 (d, 1H, *J* = 12.0 Hz, CHHBn), 4.60 (d, 1H, *J* = 11.5 Hz, CHHBn), 4.44 (bd, 2H, *J* = 7.5 Hz, NCH<sub>2</sub>Bn), 4.35-4.31 (m, 2H, H1<sup>A</sup>, H6a<sup>A</sup>), 4.07 (bd, 1H, *J* = 12.0 Hz, H6b<sup>A</sup>), 3.81 (bt, 1H, *J* = 8.5 Hz, H3<sup>A</sup>), 3.75-3.69 (bm, 1H, 5H<sup>A</sup>), 3.64 (t, 1H, *J* = 9.0 Hz, 4H<sup>A</sup>), 3.56-3.44 (m, 3H, OCHH Linker, H6a<sup>B</sup>, H4<sup>B</sup>), 3.41-3.11 (m, 7H, H3<sup>B</sup>, OCHH Linker, H2<sup>A</sup>, NCH<sub>2</sub> Linker, H6b<sup>B</sup>, H5<sup>B</sup>), 2.35 (bs, 1H, OH), 2.02 (s, 3H, CH<sub>3</sub> Ac), 1.97 (s, 3H, CH<sub>3</sub> Lev), 1.35-1.17 (m, 6H, 3 x CH<sub>2</sub> Linker). <sup>13</sup>C NMR (75.5 MHz, CDCl<sub>3</sub>): δ 170.5, 169.4, 138.3, 137.9, 137.8, 136.7, 129.0, 128.7, 128.5, 128.4, 128.2, 128.1, 127.9, 127.8, 127.7, 127.7, 127.3, 127.1, 125.3, 101.0 (C1<sup>B</sup>), 97.5 (C1<sup>A</sup>), 83.0, 78.1, 77.7, 77.4, 77.0, 76.6, 75.5, 74.9, 74.7, 73.3, 70.7, 68.8, 68.3, 67.2, 63.0, 62.1,

50.5, 50.2, 47.0, 46.1, 29.7, 28.9, 27.8, 27.4, 23.3, 20.9, 20.8. HRMS-MALDI: (M + Na<sup>+</sup>)  
calcd. 940.4106, found 940.4055.

***N*-(Benzyl)-benzyloxycarbonyl-5-aminopentyl**                      ***O*-(2-*O*-levulinoyl-3-*O*-benzyl- $\beta$ -*D*-  
glucopyranosyl)-(1 $\rightarrow$ 4)-*O*-2-azido-3-*O*-benzyl-6-*O*-acetyl-2-deoxy- $\alpha$ -*D*-glucopyranoside**

**(S18)**: Disaccharide **S2** (40 mg, 0.037 mmol) was dissolved in DCM:TFA:H<sub>2</sub>O (10/1/0.1, v/v/v) (0.06 M) and treated according to the general procedure for benzylidene acetal cleavage to give **S18** (35 mg, 94%).  $[\alpha]_D^{25} +47.0$  ( $c = 1.00$ , CHCl<sub>3</sub>); <sup>1</sup>H NMR (500 MHz, CDCl<sub>3</sub>):  $\delta$  7.39-7.25 (m, 20H, CH Aromatic), 5.17 (bd, 2H, CH<sub>2</sub> Cbz), 5.01-4.95 (m, 2H, H2<sup>B</sup>, CHHBn), 4.83-4.81 (bd, 1H,  $J = 11.0$  Hz, H1<sup>A</sup>), 4.78 (d, 2H,  $J = 11.0$  Hz, CHHBn, CHHBn), 4.62 (d, 1H,  $J = 11.5$  Hz, CHHBn), 4.51-4.49 (m, 2H, NCH<sub>2</sub>Bn), 4.46 (dd, 1H,  $J = 2.00$  Hz,  $J = 12.5$  Hz, H6a<sup>A</sup>), 4.39 (d, 1H,  $J = 8.0$  Hz, H1<sup>B</sup>), 4.29 (dd, 1H,  $J = 4.5$  Hz,  $J = 12.5$  Hz, H6b<sup>A</sup>), 3.98 (d, 1H,  $J = 9.0$  Hz, H5<sup>A</sup>), 3.91 (t, 1H,  $J = 9.5$  Hz, H3<sup>A</sup>), 3.75-3.66 (m, 2H, H4<sup>A</sup>, OCHH Linker), 3.60 (dd, 1H,  $J = 3.0$  Hz,  $J = 12.0$  Hz, H6a<sup>B</sup>), 3.53-3.45 (m, 2H, H3<sup>B</sup>, H4<sup>B</sup>), 3.30-3.16 (m, 4H, H5<sup>B</sup>, H2<sup>A</sup>, H6b<sup>B</sup>, CH<sub>2</sub>N Linker, OCHH Linker), 2.81-2.78 (m, 1H, CHH Lev), 2.65-2.59 (m, 2H, CH<sub>2</sub> Lev), 2.42-2.39 (m, CHH Lev), 1.63-1.21 (2m, 6H, 3 x CH<sub>2</sub> Linker). <sup>13</sup>C NMR (75.5 MHz, CDCl<sub>3</sub>):  $\delta$  205.7, 171.5, 170.6, 156.7, 156.1, 138.4, 138.1, 137.9, 128.6, 128.5, 128.4, 128.0, 127.9, 127.8, 127.7, 127.3, 127.0, 101.0, 97.4, 83.0, 78.1, 77.7, 77.4, 77.0, 76.6, 75.4, 74.9, 74.8, 73.6, 70.6, 68.6, 68.1, 67.1, 63.1, 62.4, 62.2, 50.5, 50.2, 46.5, 46.1, 37.5, 29.7, 29.7, 28.9, 27.8, 23.3, 20.9. HRMS-MALDI: (M + Na<sup>+</sup>) calcd. 996.43682, found 996.4386.

***N*-(Benzyl)-benzyloxycarbonyl-5-aminopentyl**                      ***O*-(2-*O*-acetyl-3-*O*-benzyl- $\beta$ -*D*-  
glucopyranosyl)-(1 $\rightarrow$ 4)-*O*-2-azido-3-*O*-benzyl-6-*O*-levulinoyl-2-deoxy- $\alpha$ -*D*-glucopyranoside**

**(S19)**: Disaccharide **S3** (2.65 g, 2.44 mmol) was dissolved in DCM:TFA:H<sub>2</sub>O (10/1/0.1, v/v/v)

(0.06 M) and treated according to the general procedure for benzylidene acetal cleavage to give **S19** (1.79 g, 88%).  $[\alpha]_D^{25} +23.0$  ( $c = 1.00$ ,  $\text{CHCl}_3$ );  $^1\text{H NMR}$  (500 MHz,  $\text{CDCl}_3$ ):  $\delta$  7.32-7.18 (m, 20H, CH Aromatic), 5.10 (bd, 2H,  $J = 17.5$  Hz,  $\text{CH}_2$  Cbz), 4.94-4.90 (m, 2H,  $\text{H}2^{\text{B}}$ ,  $\text{CHHBn}$ ), 4.74 (bd, 1H,  $J = 13.0$  Hz,  $\text{H}1^{\text{A}}$ ), 4.70 (d, 1H,  $J = 11.0$  Hz,  $\text{H}1^{\text{B}}$ ), 4.65 (d, 1H,  $J = 12.0$  Hz,  $\text{CHHBn}$ ), 4.60 (d, 1H,  $J = 12.0$  Hz,  $\text{CHHBn}$ ), 4.45-4.42 (m, 2H,  $\text{CHHBn}$ ,  $\text{NCH}_2\text{Bn}$ ), 4.25 (bd, 1H,  $J = 12.0$ ,  $\text{H}6^{\text{A}}$ ), 4.17 (d, 1H,  $J = 12.5$  Hz,  $\text{H}6^{\text{B}}$ ), 3.83-3.81 (m, 1H,  $\text{H}4^{\text{A}}$ ), 3.72-3.61 (bd, 2H, incl.  $\text{H}5^{\text{A}}$ :  $J = 5.0$  Hz,  $\text{OCHH}$  Linker), 3.59-3.52 (m, 2H, incl.  $\text{H}3^{\text{B}}$ : t, 1H,  $J = 9.0$  Hz,  $\text{H}6^{\text{B}}$ : dd, 1H,  $J = 3.0$  Hz,  $J = 12.0$  Hz), 3.45 (m, 1H,  $\text{H}4^{\text{B}}$ ), 3.36-3.34 (m, 1H,  $\text{H}5^{\text{B}}$ ), 3.24-3.14 (m, 4H,  $\text{H}2^{\text{A}}$ ,  $\text{H}3^{\text{A}}$ ,  $\text{H}6^{\text{B}}$ ,  $\text{CH}_2\text{N}$  Linker), 2.81-2.78 (m, 1H,  $\text{CHH}$  Lev), 2.65-2.59 (m, 2H,  $\text{CH}_2$  Lev), 2.42-2.39 (m,  $\text{CHH}$  Lev), 1.65-1.21 (m, 6H, 3 x  $\text{CH}_2$  Linker).  $^{13}\text{C NMR}$  (75.5 MHz,  $\text{CDCl}_3$ ):  $\delta$  206.6, 172.4, 169.6, 138.3, 138.1, 137.8, 128.6, 128.5, 128.4, 127.9, 127.8, 127.7, 127.2, 100.8, 97.6, 82.9, 77.7, 77.6, 77.4, 77.0, 76.5, 75.5, 75.0, 74.6, 73.3, 71.1, 68.8, 68.3, 67.1, 63.0, 62.3, 62.2, 50.5, 50.2, 47.0, 46.1, 37.7, 29.8, 28.9, 27.7, 27.4, 23.2, 20.9. HRMS-MALDI: ( $\text{M} + \text{Na}^+$ ) calcd. 996.43682, found 996.4386.

***N*-(Benzyl)-benzyloxycarbonyl-5-aminopentyl**                      ***O*-(2-*O*-levulinoyl-3-*O*-benzyl- $\beta$ -*D*-glucopyranosyl)-(1 $\rightarrow$ 4)-*O*-2-azido-3-*O*-benzyl-6-*O*-levulinoyl-2-deoxy- $\alpha$ -*D*-glucopyranoside**

**(S20)**: Disaccharide **S4** (140 mg, 0.123 mmol)  $\text{DCM}:\text{TFA}:\text{H}_2\text{O}$  (10/1/0.1, v/v/v) (0.06 M) and treated according to the general procedure for benzylidene acetal cleavage to give **S20** (100 mg, 77%).  $[\alpha]_D^{25} +52.1$  ( $c = 1.00$ ,  $\text{CHCl}_3$ );  $^1\text{H NMR}$  (500 MHz,  $\text{CDCl}_3$ ):  $\delta$  7.39-7.26 (m, 20H, CH Aromatic), 5.17 (bd, 2H,  $J = 17.0$  Hz,  $\text{CH}_2\text{Cbz}$ ), 5.02-4.97 (m, 2H,  $\text{H}2^{\text{B}}$ ,  $\text{CHHBn}$ ), 4.83 (d, 1H,  $J = 9.5$  Hz,  $\text{H}1^{\text{A}}$ ), 4.78 (d, 1H,  $J = 10.5$  Hz,  $\text{CHHBn}$ ), 4.77 (d, 1H,  $J = 11.5$  Hz,  $\text{CHHBn}$ ), 4.65 (d, 1H,  $J = 12.0$  Hz,  $\text{CHHBn}$ ), 4.53 (d, 1H,  $J = 8.0$  Hz,  $\text{H}1^{\text{B}}$ ), 4.48 (m, 2H,  $\text{H}6^{\text{A}}$ ,  $\text{NCH}_2\text{Bn}$ ), 4.28 (d,

1H,  $J = 10.5$  Hz, H6b<sup>A</sup>), 4.00 (d, 1H,  $J = 10.0$  Hz, H5<sup>A</sup>), 3.92 (t, 1H,  $J = 10.0$  Hz, H3<sup>A</sup>), 3.80 (t, 1H,  $J = 9.5$  Hz, H4<sup>A</sup>), 3.68 (m, 2H, H3<sup>B</sup>, OCHH Linker), 3.60 (dd, 1H,  $J = 2.5$  Hz,  $J = 10.5$  Hz, H6a<sup>B</sup>), 3.53 (ddd, 1H,  $J = 4.0$  Hz,  $J = 9.5$  Hz,  $J = 18.5$  Hz, H4<sup>B</sup>), 3.46-3.43 (ddd, 1H,  $J = 3.0$  Hz,  $J = 6.0$  Hz,  $J = 15.5$  Hz, H6b<sup>B</sup>), 3.34-3.21 (m, 4H, H5<sup>B</sup>, H2<sup>A</sup>, CH<sub>2</sub>N Linker), 2.92-2.79 (m, 2H, CH<sub>2</sub> Lev), 2.71-2.61 (m, 4H, 2 x CH<sub>2</sub> Lev), 2.56-2.36 (m, 2H, CH<sub>2</sub> Lev), 2.18 (s, 3H, CH<sub>3</sub> Lev), 2.11 (bd, 3H,  $J = 10.0$  Hz, CH<sub>3</sub> Lev), 1.61-1.25 (2m, 6H, 3 x CH<sub>2</sub> Linker). <sup>13</sup>C NMR (75.5 MHz, CDCl<sub>3</sub>):  $\delta$  206.7, 205.8, 172.5, 171.5, 138.5, 138.3, 137.9, 136.7, 128.6, 128.5, 128.4, 127.9, 127.8, 127.7, 127.3, 127.1, 100.8, 97.6, 83.0, 77.9, 77.7, 77.4, 77.0, 76.5, 75.3, 75.0, 74.6, 73.7, 71.1, 68.6, 68.1, 67.1, 63.1, 62.6, 62.4, 50.5, 50.2, 46.5, 46.1, 37.7, 37.6, 29.9, 29.7, 28.9, 27.8, 23.2. HRMS-MALDI: (M + Na<sup>+</sup>) calcd. 1052.4630, found 1052.4660.

***N*-(Benzyl)-benzyloxycarbonyl-5-aminopentyl**

***O*-(2-*O*-acetyl-3-*O*-benzyl- $\alpha$ -L-**

**idopyranosyl)-(1 $\rightarrow$ 4)-*O*-2-azido-3-*O*-benzyl-6-*O*-acetyl-2-deoxy- $\alpha$ -D-glucopyranoside (S21):**

Disaccharide **S5** (130 mg, 0.135mmol) was dissolved in DCM:TFA:H<sub>2</sub>O (10/1/0.1, v/v/v) (0.06 M) and treated according the general procedure for benzylidene acetal cleavage to give **S21** (80 mg, 67%).  $[\alpha]_D^{24} +51.0$  ( $c = 1$ , CHCl<sub>3</sub>); <sup>1</sup>H NMR (500 MHz, CDCl<sub>3</sub>):  $\delta$  7.44-7.26 (m, 25H, CH Aromatic), 5.18 (bd, 2H,  $J = 15.0$  Hz, CH<sub>2</sub>Cbz), 4.97 (bs, 1H, H2<sup>B</sup>), 4.89-4.85 (m, 2H, H1<sup>A</sup>, H1<sup>B</sup>), 4.77-4.75 (m, 2H, CHHBn, CHHBn), 4.61 (d, 1H,  $J = 11.5$  Hz, CHHBn), 4.57 (d, 1H,  $J = 12.5$  Hz, CHHBn), 4.50 (bd, 2H,  $J = 6.5$  Hz, NCH<sub>2</sub>Bn), 4.40 (d, 1H,  $J = 12.5$  Hz, H6), 4.22-4.20 (m, 2H, H5<sup>A</sup>, H6a<sup>B</sup>), 3.86-3.81 (m, 3H, H5<sup>A</sup>, H4<sup>A</sup>, H3<sup>A</sup>), 3.70-3.58 (m, 3H, OCHH Linker, H3<sup>B</sup>, H4<sup>B</sup>), 3.44-3.16 (m, 5H, OCHH Linker, incl. H2<sup>A</sup>: dd,  $J = 3.0$  Hz,  $J = 9.5$  Hz at 3.34, H6a<sup>B</sup>, CH<sub>2</sub>N Linker), 2.09 (s, 3H, CH<sub>3</sub> Ac), 2.08 (s, 3H, CH<sub>3</sub> Ac), 1.68-1.26 (m, 6H, 3 x CH<sub>2</sub> Linker). <sup>13</sup>C NMR (75.5 MHz, CDCl<sub>3</sub>):  $\delta$  170.5, 169.4, 156.2, 137.8, 137.5, 137.4, 136.7, 128.5, 128.4,

128.4, 128.2, 128.0, 127.9, 127.8, 127.3, 97.8, 97.5, 78.8, 77.4, 77.0, 76.5, 75.1, 74.9, 73.6, 72.1, 69.2, 69.2, 68.2, 67.6, 67.4, 67.1, 67.0, 63.8, 62.9, 62.6, 62.2, 50.5, 50.2, 47.0, 46.1, 29.6, 29.0, 27.8, 27.4, 23.3, 20.9, 20.8. HRMS-MALDI: (M + Na<sup>+</sup>) calcd. 940.4106, found 940.4123.

***N*-(Benzyl)-benzyloxycarbonyl-5-aminopentyl *O*-(2-*O*-levulinoyl-3-*O*-benzyl- $\alpha$ -L-idopyranosyl)-(1 $\rightarrow$ 4)-*O*-2-azido-3-*O*-benzyl-6-*O*-acetyl-2-deoxy- $\alpha$ -D-glucopyranoside (S22):**

Disaccharide **S6** (140 mg, 0.129 mmol) was dissolved in DCM:TFA:H<sub>2</sub>O (10/1/0.1, v/v/v) (0.06 M) and treated according to the general procedure for benzylidene acetal cleavage to give **S22** (84.7 mg, 60%). [ $\alpha$ ]<sub>D</sub><sup>25</sup> +53.3 (*c* = 1, CHCl<sub>3</sub>). <sup>1</sup>H NMR (500 MHz, CDCl<sub>3</sub>):  $\delta$  7.34-7.11 (m, 20H, CH Aromatic), 5.12-5.1 (bd, 2H, *J* = 15.0 Hz, CH<sub>2</sub>Cbz), 4.89 (bs, 1H, H2<sup>B</sup>), 4.81-4.77 (m, 2H, H1<sup>A</sup>, H1<sup>B</sup>), 4.70-4.66 (m, 2H, 2 x CHHBn), 4.54 (d, 1H, *J* = 11.3 Hz, CHHBn), 4.50 (d, 1H, *J* = 10.5 Hz, CHHBn), 4.45 (bd, 1H, *J* = 6.9 Hz, NCH<sub>2</sub>Bn), 4.34 (bd, 1H, *J* = 12.2 Hz, H6a<sup>A</sup>), 4.14-4.11 (m, 2H, H6b<sup>A</sup>, H5<sup>B</sup>), 3.83-3.73 (m, 3H, H4<sup>A</sup>, H5<sup>A</sup>, H3<sup>A</sup>), 3.58-3.51 (m, 3H, OCHH Linker, H3<sup>B</sup>, H4<sup>B</sup>), 3.38-3.07 (m, 6H, OCHH Linker, H6a<sup>B</sup>, NCH<sub>2</sub> Linker, H3<sup>B</sup>, H6b<sup>B</sup>), 2.70 (t, 2H, *J* = 5.5 Hz, CH<sub>2</sub> Lev), 2.53-2.47 (m, 3H, CH<sub>2</sub> Lev, OH), 2.1 (s, 3H, CH<sub>3</sub> Ac), 2.01 (s, 3H, CH<sub>3</sub> Lev), 1.61-1.15 (m, 6H, 3 x CH<sub>2</sub> Linker). <sup>13</sup>C NMR (75.5 MHz, CDCl<sub>3</sub>):  $\delta$  206.3, 171.6, 170.6, 137.9, 137.6, 137.5, 128.5-127.3, 97.7, 97.5, 78.8, 75.2, 75.0, 73.5, 72.2, 69.2, 68.2, 67.6, 67.5, 67.2, 67.0, 63.8, 63.0, 62.3, 50.6, 50.2, 47.0, 37.9, 29.7, 29.6, 29.1, 28.0, 23.3, 20.9. HRMS-MALDI: (M + Na<sup>+</sup>) calcd. 996.43682, found 996.4386.

***N*-(Benzyl)-benzyloxycarbonyl-5-aminopentyl *O*-(2-*O*-acetyl-3-*O*-benzyl- $\alpha$ -L-idopyranosyl)-(1 $\rightarrow$ 4)-*O*-2-azido-3-*O*-benzyl-6-*O*-levulinoyl-2-deoxy- $\alpha$ -D-glucopyranoside (S23):**

Disaccharide **S7** (160 mg, 0.147 mmol) was dissolved in DCM:TFA:H<sub>2</sub>O (10/1/0.1, v/v/v)

(0.06 M) and treated according to the general procedure for benzylidene acetal cleavage to give **S23** (110 mg, 75%).  $[\alpha]_D^{24} +42$  ( $c = 1$ ,  $\text{CHCl}_3$ );  $^1\text{H NMR}$  (500 MHz,  $\text{CDCl}_3$ ):  $\delta$  5.11 (bd, 2H,  $J = 16.0$  Hz,  $\text{CH}_2\text{Cbz}$ ), 4.90 (bs, 1H,  $\text{H}2^{\text{B}}$ ), 4.80 (bd, 2H,  $J = 11.5$  Hz,  $\text{H}1^{\text{A}}$ ), 4.75 (bs, 1H,  $\text{H}1^{\text{B}}$ ), 4.70-4.66 (m,  $\text{CHHBn}$ ,  $\text{CHHBn}$ ), 4.55-4.51 (m, 2H,  $\text{CHHBn}$ ,  $\text{CHHBn}$ ), 4.47-4.41 (bd, 2H,  $J = 7.0$  Hz,  $\text{NCH}_2\text{Bn}$ ), 4.32 (d, 1H,  $J = 12.0$  Hz,  $\text{H}6^{\text{A}}$ ), 4.18 (bd, 1H,  $J = 12.0$  Hz,  $\text{H}6^{\text{A}}$ ), 4.11 (t, 1H,  $J = 5.0$  Hz,  $\text{H}5^{\text{B}}$ ), 3.84-3.74 (m, 3H,  $\text{H}5^{\text{A}}$ ,  $\text{H}4^{\text{A}}$ ,  $\text{H}3^{\text{A}}$ ), 3.68-3.50 (m, 3H,  $\text{H}3^{\text{B}}$ ,  $\text{OCHH}$  Linker,  $\text{H}4^{\text{B}}$ ), 3.38-3.16 (m, 4H,  $\text{OCHH}$  Linker,  $\text{H}2^{\text{A}}$ ,  $\text{CH}_2\text{N}$  Linker), 3.12 (dd, 1H,  $J = 4.5$  Hz,  $J = 12.0$  Hz,  $\text{H}6^{\text{B}}$ ), 2.74-2.45 (m, 4H, 2 x  $\text{CH}_2$  Lev), 2.10 (s, 3H,  $\text{CH}_3$  Lev), 1.88 (s, 3H,  $\text{CH}_3$  Ac), 1.60-1.16 (m, 6H, 3 x  $\text{CH}_2$  Linker). HRMS-MALDI: ( $\text{M} + \text{Na}^+$ ) calcd. 996.43682, found 996.4386.

**Dimethylhexylsilyl *O*-(methyl-2-*O*-acetyl-3-*O*-benzyl- $\beta$ -D-glucopyranosyluronate)-(1 $\rightarrow$ 4)-*O*-2-azido-3-*O*-benzyl-2-deoxy-6-*O*-acetyl- $\beta$ -D-glucopyranoside (**41**):** Compound **S9** (0.29 g, 0.37 mmol) was subjected to TEMPO/BAIB mediated oxidation and esterification using diazomethane according to the general procedure to give **41** (230 mg, 76%, two steps).  $[\alpha]_D^{25} +20.5$  ( $c = 1$ ,  $\text{CHCl}_3$ );  $^1\text{H NMR}$  (500 MHz,  $\text{CDCl}_3$ ):  $\delta$  7.36-7.25 (m, 10H, CH Aromatic), 4.97 (m, 2H,  $\text{H}2^{\text{B}}$ ,  $\text{CHHBn}$ ), 4.83-4.78 (m, 2H,  $\text{CHHBn}$ ,  $\text{CHHBn}$ ), 4.68 (d, 1H,  $J = 12.0$  Hz,  $\text{CHHBn}$ ), 4.58 (d, 1H,  $J = 8.0$  Hz,  $\text{H}1^{\text{B}}$ ), 4.46 (d, 1H,  $J = 8.0$  Hz,  $\text{H}1^{\text{A}}$ ), 4.37 (dd, 1H,  $J = 2.5$  Hz,  $J = 12.0$  Hz,  $\text{H}6^{\text{A}}$ ), 4.12- 4.06 (m, 2H,  $\text{H}6^{\text{A}}$ ,  $\text{H}5^{\text{B}}$ ), 3.91 (m, 1H,  $\text{H}4^{\text{B}}$ ), 3.67 (m, 1H,  $\text{H}4^{\text{A}}$ ), 3.63 (m, 1H,  $\text{H}3^{\text{B}}$ ), 3.57 (s, 3H,  $\text{CO}_2\text{CH}_3$ ), 3.49 (t, 1H,  $J = 9.0$  Hz,  $\text{H}5^{\text{A}}$ ), 3.37 (t, 1H,  $J = 10.0$  Hz,  $\text{H}3^{\text{A}}$ ), 3.30 (t, 1H,  $J = 8.0$  Hz,  $\text{H}2^{\text{A}}$ ), 2.06 (s, 3H,  $\text{CH}_3$  Ac), 1.99 (s, 3H,  $\text{CH}_3$  Ac), 1.67-1.61 [m, 1H,  $\text{CH}(\text{CH}_3)_2$ ], 0.88-0.86 [4s, 12H,  $\text{C}(\text{CH}_3)_2$  and  $\text{CH}(\text{CH}_3)_2$ ], 0.17-0.15 [2s, 6H,  $\text{Si}(\text{CH}_3)_2$ ]. HRMS-MALDI: ( $\text{M} + \text{Na}^+$ ) calcd. 824.3401, found 824.3415.

Dimethylhexylsilyl

*O*-(methyl-2-*O*-levulinoyl-3-*O*-benzyl- $\beta$ -D-

glucopyranosyluronate)-(1 $\rightarrow$ 4)-*O*-2-azido-3-*O*-benzyl-2-deoxy-6-*O*-acetyl- $\beta$ -D-

glucopyranoside (**42**): Compound **S10** (0.20 g, 0.24 mmol) was subjected to TEMPO/BAIB mediated oxidation and esterification using diazomethane according to the general procedure to give **42** (150 mg, 72%, two steps).  $[\alpha]_D^{25} +4.7$  ( $c = 1$ ,  $\text{CHCl}_3$ );  $^1\text{H NMR}$  (500 MHz,  $\text{CDCl}_3$ ):  $\delta$  7.36-7.25 (m, 10H, CH Aromatic), 4.98-4.94 (m, 2H, H2<sup>B</sup>, CHHBn), 4.80 (d, 1H,  $J = 12.0$  Hz, CHHBn), 4.77 (d, 1H,  $J = 11.0$  Hz, CHHBn), 4.72 (d, 1H,  $J = 12.0$  Hz, CHHBn), 4.58 (d, 1H,  $J = 8.5$  Hz, H1<sup>B</sup>), 4.48 (d, 1H,  $J = 8.0$  Hz, H1<sup>A</sup>), 4.32 (dd, 1H,  $J = 2.5$  Hz,  $J = 11.5$  Hz, H6a<sup>A</sup>), 4.18 (dd, 1H,  $J = 6.5$  Hz,  $J = 11.5$  Hz, H6b<sup>A</sup>), 3.91 (t, 1H,  $J = 9.5$  Hz, H4<sup>B</sup>), 3.71 (t, 1H,  $J = 8.5$  Hz, H4<sup>A</sup>), 3.64 (d, 1H,  $J = 10.0$  Hz, H5<sup>B</sup>), 3.58-3.52 (m, 1H, H5<sup>A</sup>), 3.56 (s, 3H,  $\text{CO}_2\text{CH}_3$ ), 3.50 (t, 1H,  $J = 9.0$  Hz, H3<sup>B</sup>), 3.38 (t, 1H,  $J = 8.5$  Hz, H3<sup>A</sup>), 3.32-3.29 (m, 1H, H2<sup>A</sup>), 2.92 (bs, 1H, 4-OH), 2.78-2.74 (m, 1H, CHH Lev) 2.72-2.53 (m, 2H, CH<sub>2</sub> Lev), 2.43-2.37 (m, 1H, CHH Lev), 2.18 (s, 3H, CH<sub>3</sub> Lev), 2.00 (s, 3H, CH<sub>3</sub> Ac), 1.67-1.61 [m, 1H, CH(CH<sub>3</sub>)<sub>2</sub>], 0.88-0.86 [4s, 12H, C(CH<sub>3</sub>)<sub>2</sub> and CH(CH<sub>3</sub>)<sub>2</sub>], 0.16-0.15 [2s, 6H, Si(CH<sub>3</sub>)<sub>2</sub>].  $^{13}\text{C NMR}$  (75.5 MHz,  $\text{CDCl}_3$ ):  $\delta$  206.1, 171.3, 170.6, 169.2, 138.7, 138.1, 128.4, 128.2, 127.8, 127.3, 127.2, 101.1, 96.7, 81.3, 81.0, 78.3, 77.4, 77.0, 76.6, 74.8, 74.6, 74.1, 72.8, 72.5, 72.0, 68.6, 62.7, 52.6, 37.6, 33.9, 29.8, 29.7, 27.7, 24.8, 20.8, 19.9, 19.8, 18.4, 18.3, -2.2, -3.2. HRMS-MALDI: (M + Na<sup>+</sup>) calcd. 880.3664, found 880.3683.

Dimethylhexylsilyl *O*-(methyl-2-*O*-acetyl-3-*O*-benzyl- $\beta$ -D-glucopyranosyluronate)-(1 $\rightarrow$ 4)-*O*-2-azido-3-*O*-benzyl-2-deoxy-6-*O*-levulinoyl- $\beta$ -D-glucopyranoside (**43**): Compound **S11** (3.65 g, 4.40 mmol) was subjected to TEMPO/BAIB mediated oxidation and esterification using diazomethane according to the general procedure to give **43** (3.3 g, 88%, two steps).  $[\alpha]_D^{24} +17.1$

(*c* = 1, CHCl<sub>3</sub>); <sup>1</sup>H NMR (300 MHz, CDCl<sub>3</sub>): δ 7.36-7.25 (m, 10H, CH Aromatic), 4.97 (m, 2H, H2<sup>B</sup>, CHHBn), 4.82 (d, 1H, *J* = 12.0 Hz, CHHBn), 4.73 (d, 1H, *J* = 11.0 Hz, CHHBn), 4.68 (d, 1H, *J* = 12.0 Hz, CHHBn), 4.640 (d, 1H, *J* = 8.0 Hz, H1<sup>B</sup>), 4.46 (d, 1H, *J* = 7.5 Hz, H1<sup>A</sup>), 4.32 (dd, 1H, *J* = 1.0 Hz, *J* = 10.5 Hz, H6a<sup>A</sup>), 4.18 (dd, 1H, *J* = 5.0 Hz, *J* = 11.5 Hz, H6b<sup>A</sup>), 3.93 (t, 1H, *J* = 9.5 Hz, H4<sup>B</sup>), 3.85 (d, 1H, *J* = 9.5 Hz, H5<sup>B</sup>), 3.78 (t, 1H, *J* = 9.0 Hz, H4<sup>A</sup>), 3.63 (t, 1H, *J* = 9.0 Hz, H3<sup>B</sup>), 3.54 (s, 3H, CO<sub>2</sub>CH<sub>3</sub>), 3.42-3.40 (m, 1H, H5<sup>A</sup>), 3.35 (t, 1H, *J* = 10.0 Hz, H3<sup>A</sup>), 3.30 (t, 1H, *J* = 7.5 Hz, H2<sup>A</sup>), 3.02 (bs, 1H, 4-OH), 2.87-2.81 (m, 1H, CHH Lev) 2.72-2.49 (m, 3H, CH<sub>2</sub> Lev, CHH Lev), 2.18 (s, 3H, CH<sub>3</sub> Lev), 2.00 (s, 3H, CH<sub>3</sub> Ac), 1.67-1.61 [m, 1H, CH(CH<sub>3</sub>)<sub>2</sub>], 0.88-0.86 [4s, 12H, C(CH<sub>3</sub>)<sub>2</sub>, CH(CH<sub>3</sub>)<sub>2</sub>], 0.16-0.15 [2s, 6H, Si(CH<sub>3</sub>)<sub>2</sub>]. <sup>13</sup>C NMR (75.5 MHz, CDCl<sub>3</sub>): δ 206.5, 172.3, 169.4, 169.4, 138.6, 138.2, 128.4, 128.1, 127.7, 127.6, 127.4, 127.3, 101.0, 96.7, 81.3, 80.9, 77.9, 77.4, 77.0, 76.6, 74.9, 74.5, 74.0, 72.6, 72.5, 72.1, 68.4, 62.5, 52.5, 37.8, 33.9, 29.8, 27.7, 24.7, 20.8, 19.9, 19.8, 18.4, 18.3, -2.1, -3.2. HRMS-MALDI: (M + Na<sup>+</sup>) calcd. 880.3664, found 880.3683.

**Dimethylthexylsilyl O-(methyl-2-O-levulinoyl-3-O-benzyl-β-D-glucopyranosyluronate)-(1→4)-O-2-azido-3-O-benzyl-2-deoxy-6-O-levulinoyl-β-D-glucopyranoside (44):** Compound **S12** (0.297 g, 0.33 mmol) was subjected to TEMPO/BAIB mediated oxidation and esterification using diazomethane according to the general procedure to give **44** (217.2 mg, 71%, 2 steps). [ $\alpha$ ]<sub>D</sub><sup>25</sup> -7.2 (*c* = 1, CHCl<sub>3</sub>); <sup>1</sup>H NMR (500 MHz, CDCl<sub>3</sub>): δ 7.36-7.25 (m, 10H, CH Aromatic), 4.95-4.89 (m, 2H, H2<sup>B</sup>, CHHBn), 4.74 (d, *J* = 12.0 Hz, 1H, CHHBn), 4.63 (d, *J* = 12.0 Hz, 1H, CHHBn), 4.62 (d, *J* = 11.0 Hz, 1H, CHHBn), 4.640 (d, *J* = 8.0 Hz, 1H, H1<sup>B</sup>), 4.41 (d, *J* = 7.5 Hz, 1H, H1<sup>A</sup>), 4.28 (dd, *J* = 2.0 Hz, *J* = 12.0 Hz, 1H, H6a<sup>A</sup>), 4.21 (dd, *J* = 4.5 Hz, *J* = 12.0 Hz, 1H, H6b<sup>A</sup>), 3.85 (bd, 1H, *J* = 3.5 Hz, H4<sup>B</sup>, H5<sup>B</sup>), 3.75 (t, 1H, *J* = 8.5 Hz, H4<sup>A</sup>), 3.63-3.57 (m, 1H,



H3<sup>B</sup>), 3.52-3.48(m, 1H, H5<sup>A</sup>), 3.46(s, 3H, CO<sub>2</sub>CH<sub>3</sub>), 3.29 (t, 1H, *J* = 8.0 Hz, H3<sup>A</sup>), 3.25-3.21 (m, 1H, H2<sup>A</sup>), 2.87 (bs, 1H, 4-OH), 2.81-2.41 (m, 8H, 4 xCH<sub>2</sub> Lev) 2.11 (s, 3H, CH<sub>3</sub> Lev), 2.08 (s, 3H, CH<sub>3</sub> Lev), 1.67-1.61 [m, 1H, CH(CH<sub>3</sub>)<sub>2</sub>], 0.88-0.86 [4s, 12H, C(CH<sub>3</sub>)<sub>2</sub> and C(CH<sub>3</sub>)<sub>2</sub>], 0.16-0.15 [2s, 6H, Si(CH<sub>3</sub>)<sub>2</sub>]. <sup>13</sup>C NMR (75.5 MHz, CDCl<sub>3</sub>): δ 206.6, 206.0, 172.4, 171.3, 169.5, 138.7, 138.3, 129.0, 128.3, 128.1, 127.6, 127.5, 127.2, 100.9, 96.7, 81.4, 80.9, 77.8, 77.4, 76.9, 76.5, 75.0, 74.5, 74.0, 72.8, 72.4, 72.1, 68.5, 62.7, 52.5, 37.8, 37.5, 33.9, 33.6, 31.9, 30.1, 29.8, 29.7, 29.6, 29.3, 27.8, 27.7, 26.6, 24.8, 23.1, 22.6, 19.9, 19.8, 18.4, 18.3, 14.0, -2.1, -3.2. HRMS-MALDI: (M + Na<sup>+</sup>) calcd. 936.3926, found 936.3956

**Dimethylthexylsilyl *O*-(methyl-2-*O*-acetyl-3-*O*-benzyl- $\alpha$ -L-idopyranosyluronate)-(1 $\rightarrow$ 4)-*O*-2-azido-3-*O*-benzyl-2-deoxy-6-*O*-acetyl- $\beta$ -D-glucopyranoside (53):** Compound **S13** (116 mg, 0.149 mmol) was subjected to TEMPO/BAIB mediated oxidation and esterification using diazomethane according to the general procedure to give **53** (63.7 mg, 54%, two steps). [ $\alpha$ ]<sub>D</sub><sup>25</sup> +16.2 (*c* = 1, CHCl<sub>3</sub>); <sup>1</sup>H NMR (500 MHz, CDCl<sub>3</sub>): δ 7.24-7.13 (m, 10H, CH Aromatic), 4.93 (s, 1H, H1<sup>B</sup>), 4.83 (bs, 1H, H5<sup>B</sup>), 4.79 (bs, 1H, H2<sup>B</sup>), 4.61 (d, 1H, *J* = 11.5 Hz, CHHBn), 4.60 (d, 1H, *J* = 11.0 Hz, CHHBn), 4.56 (d, 1H, *J* = 11.0 Hz, CHHBn), 4.51 (d, 1H, *J* = 11.5 Hz, CHHBn), 4.39-4.34 (m, 2H, H1<sup>A</sup>, H6a<sup>A</sup>), 4.99 (dd, 1H, *J* = 5.5 Hz, *J* = 12.0 Hz, H6b<sup>A</sup>), 3.85 (bd, 1H, *J* = 11.0 Hz, H4<sup>B</sup>), 3.70 (t, 1H, *J* = 9.5 Hz, H4<sup>A</sup>), 3.60 (bs, 1H, H3<sup>B</sup>), 3.36(s, 3H, CO<sub>2</sub>CH<sub>3</sub>), 3.34-3.32 (m, 1H, H5<sup>A</sup>), 3.22 (dd, 1H, *J* = 8.0 Hz, *J* = 10.0 Hz, H2<sup>A</sup>), 3.14 (t, 1H, *J* = 10.0 Hz, H3<sup>A</sup>), 2.52 (d, 1H, *J* = 11.5 Hz, 4-OH), 1.95 (s, 3H, CH<sub>3</sub> Ac), 1.92 (s, 3H, CH<sub>3</sub> Ac), 1.58-1.51 [m, 1H, CH(CH<sub>3</sub>)<sub>2</sub>], 0.77-0.75 [4s, 12H, C(CH<sub>3</sub>)<sub>2</sub> and CH(CH<sub>3</sub>)<sub>2</sub>], 0.06-0.05 [2s, 6H Si(CH<sub>3</sub>)<sub>2</sub>]. <sup>13</sup>C NMR (75.5 MHz, CDCl<sub>3</sub>): δ 173.8, 172.7, 172.5, 141.3, 140.6, 132.0, 131.8, 131.5, 131.4, 131.3, 131.1, 130.7, 130.6, 129.3, 101.2, 100.3, 84.3, 80.8, 80.6, 80.4, 79.9, 79.3, 78.2, 77.9, 77.7, 76.5,

75.6, 72.2, 71.7, 71.0, 70.4, 70.2, 65.7, 55.4, 37.2, 28.1, 24.3, 24.2, 24.1, 23.2, 23.1, 21.8, 21.7, -2.2, -3.2. HRMS-MALDI: (M + Na<sup>+</sup>) calcd. 824.3401, found 824.3415.

**Dimethylhexylsilyl**

***O*-(methyl-2-*O*-levulinoyl-3-*O*-benzyl-4-*O*-(9-**

**fluorenylmethoxycarbonyl)- $\beta$ -L-idopyranosyluronate)-(1 $\rightarrow$ 4)-*O*-2-azido-3-*O*-benzyl-2-**

**deoxy-6-*O*-acetyl- $\beta$ -D-glucopyranoside (54):** Compound **S14** (71 mg, 0.086 mmol) was subjected to TEMPO/BAIB mediated oxidation and esterification using diazomethane according to the general procedure to give **54** (56.6 mg, 76%, two steps).  $[\alpha]_D^{25} +24.3$  ( $c = 1.3$ , CHCl<sub>3</sub>); <sup>1</sup>H NMR (500 MHz, CDCl<sub>3</sub>):  $\delta$  7.25-7.11 (m, 10H, CH Aromatic), 4.93 (s, 1H, H1<sup>B</sup>), 4.81 (d, 1H,  $J = 1.7$  Hz, H5<sup>B</sup>), 4.79 (bs, 1H, H2<sup>B</sup>), 4.62 (d, 1H,  $J = 11.5$  Hz, CHHBn), 4.59 (d, 1H,  $J = 11.4$  Hz, CHHBn), 4.55 (d, 1H,  $J = 11.4$  Hz, CHHBn), 4.51 (d, 1H,  $J = 11.5$  Hz, CHHBn), 4.39 (d, 1H,  $J = 7.7$  Hz, H1<sup>A</sup>), 4.34 (dd, 1H,  $J = 2.0$  Hz,  $J = 11.9$  Hz, H6a<sup>A</sup>), 4.00 (dd, 1H,  $J = 4.8$  Hz,  $J = 11.7$  Hz, H6b<sup>A</sup>), 3.86 (bd, 1H,  $J = 8.6$ , H4<sup>B</sup>), 3.72 (t, 1H,  $J = 9.3$  Hz, H4<sup>A</sup>), 3.61 (bs, 1H, H3<sup>B</sup>), 3.36 (s, 1H, CO<sub>2</sub>CH<sub>3</sub>), 3.33 (ddd, 1H,  $J = 3.3$  Hz,  $J = 5.7$  Hz,  $J = 10.1$  Hz, H5<sup>A</sup>), 3.22 (dd, 1H,  $J = 7.7$  Hz,  $J = 9.9$  Hz, H2<sup>A</sup>), 3.12 (t, 1H,  $J = 9.2$  Hz, H3<sup>A</sup>), 2.64 (dd, 2H,  $J = 2.7$  Hz,  $J = 7.0$  Hz, CH<sub>2</sub> Lev), 2.54 (d, 1H,  $J = 10.4$  Hz, 4-OH), 2.44 (t, 1H,  $J = 7.0$  Hz, CH<sub>2</sub> Lev), 2.05 (s, 3H, CH<sub>3</sub> Lev), 1.95 (s, 3H, CH<sub>3</sub> Ac), 1.54-1.42 [m, 1H, CH(CH<sub>3</sub>)<sub>2</sub>], 0.77-0.75 [4s, 12H, C(CH<sub>3</sub>)<sub>2</sub> and CH(CH<sub>3</sub>)<sub>2</sub>], 0.06-0.05 [2s, 6H, Si(CH<sub>3</sub>)<sub>2</sub>]. <sup>13</sup>C NMR (75.5 MHz, CDCl<sub>3</sub>):  $\delta$  206.1, 171.3, 171.1, 170.5, 169.4, 138.0, 137.3, 128.4, 128.1, 128.0, 127.9, 127.4, 127.3, 97.9, 97.0, 77.4, 77.0, 76.6, 74.7, 74.6, 74.5, 73.2, 72.3, 68.9, 68.4, 67.6, 67.3, 62.3, 52.0, 37.8, 33.9, 29.6, 29.7, 27.9, 24.8, 22.7, 20.8, 19.9, 19.8, 18.4, 18.4, -2.2, -3.3. HRMS-MALDI: (M + Na<sup>+</sup>) calcd. 880.3664, found 880.3683.

**Dimethylhexylsilyl O-(methyl-2-O-acetyl-3-O-benzyl-β-L-idopyranosyluronate)-(1→4)-O-2-azido-3-O-benzyl-2-deoxy-6-O-levulinoyl-β-D-glucopyranoside (55):** Compound **S15** (90 mg, 0.108 mmol) was subjected to TEMPO/BAIB mediated oxidation and esterification using diazomethane according to the general procedure to give **55** (56.5 mg, 60%, two steps).  $[\alpha]_D^{25} +32.2$  ( $c = 1$ ,  $\text{CHCl}_3$ );  $^1\text{H NMR}$  (500 MHz,  $\text{CDCl}_3$ ):  $\delta$  7.24-7.14 (m, 10H, CH Aromatic), 4.89 (s, 1H,  $\text{H1}^{\text{B}}$ ), 4.83 (bs, 1H,  $\text{H5}^{\text{B}}$ ), 4.80 (bs, 1H,  $\text{H2}^{\text{B}}$ ), 4.61 (d, 1H,  $J = 11.5$  Hz,  $\text{CHHBn}$ ), 4.56 (m, 2H,  $\text{CHHBn}$ ,  $\text{CHHBn}$ ), 4.50 (d, 1H,  $J = 11.5$  Hz,  $\text{CHHBn}$ ), 4.39-4.37 (m, 2H,  $\text{H1}^{\text{A}}$ ,  $\text{H6a}^{\text{A}}$ ), 4.00 (dd, 1H,  $J = 4.0$  Hz,  $J = 11.0$  Hz,  $\text{H6b}^{\text{A}}$ ), 3.84 (bd, 1H,  $J = 8.0$  Hz,  $\text{H4}^{\text{B}}$ ), 3.71 (t, 1H,  $J = 9.5$  Hz,  $\text{H4}^{\text{A}}$ ), 3.60 (bs, 1H,  $\text{H3}^{\text{B}}$ ), 3.36 (s, 1H,  $\text{CO}_2\text{CH}_3$ ), 3.33-3.30 (m, 1H,  $\text{H5}^{\text{A}}$ ), 3.21 (t, 1H,  $J = 10.0$  Hz,  $\text{H2}^{\text{A}}$ ), 3.11 (t, 1H,  $J = 10.0$  Hz,  $\text{H3}^{\text{A}}$ ), 2.66-2.63 (m, 2H,  $\text{CH}_2$  Lev), 2.53-2.47 (m, 3H,  $\text{CH}_2$  Lev, 4-OH), 2.07 (s, 3H,  $\text{CH}_3$  Lev), 1.97 (s, 3H,  $\text{CH}_3$  Ac), 1.54–1.52 [m, 1H,  $\text{CH}(\text{CH}_3)_2$ ], 0.77-0.75 [4s, 12H,  $\text{C}(\text{CH}_3)_2$  and  $\text{CH}(\text{CH}_3)_2$ ], 0.06-0.05 [2s, 6H,  $\text{Si}(\text{CH}_3)_2$ ].  $^{13}\text{C NMR}$  (75.5 MHz,  $\text{CDCl}_3$ ):  $\delta$  206.4, 172.2, 169.4, 169.3, 138.0, 137.3, 128.5, 128.2, 128.1, 128.0, 127.5, 127.3, 97.8, 97.0, 77.5, 77.0, 76.6, 74.6, 74.5, 74.3, 73.2, 72.2, 68.9, 68.3, 67.7, 67.0, 62.5, 52.0, 49.3, 37.8, 33.9, 29.8, 29.7, 29.3, 27.9, 24.8, 22.7, 21.0, 19.9, 19.8, 18.5, 18.4, -2.2, -3.3. HRMS-MALDI: ( $\text{M} + \text{Na}^+$ ) calcd. 880.3664, found 880.3683.

**Dimethylhexylsilyl O-(methyl-2-O-levulinoyl-3-O-benzyl-β-D-glucopyranosyluronate)-(1→4)-O-2-azido-3-O-benzyl-2-deoxy-6-O-levulinoyl-β-D-glucopyranoside (56):** Compound **S16** (50 mg, 0.056 mmol) was subjected to TEMPO/BAIB mediated oxidation and esterification using diazomethane according to the general procedure to give **56** (27 mg, 53%, two steps).  $[\alpha]_D^{25} -40.9$  ( $c = 1$ ,  $\text{CHCl}_3$ );  $^1\text{H NMR}$  (500 MHz,  $\text{CDCl}_3$ ):  $\delta$  7.44-7.25 (m, 10H, CH Aromatic), 4.99 (s, 1H,  $\text{H2}^{\text{B}}$ ), 4.91 (bs, 2H,  $\text{H1}^{\text{B}}$ ,  $\text{H5}^{\text{B}}$ ), 4.73 (d, 1H,  $J = 11.5$  Hz,  $\text{CHHBn}$ ), 4.66 (bs, 2H,

CHHBn, CHHBn), 4.61 (d, 1H,  $J = 11.5$  Hz, CHHBn), 4.49 (d, 1H,  $J = 7.5$  Hz, H1<sup>A</sup>), 4.46 (dd, 1H,  $J = 2.0$  Hz,  $J = 12.5$  Hz, H6a<sup>A</sup>), 4.11 (dd, 1H,  $J = 5.0$  Hz,  $J = 12.5$  Hz, H6b<sup>A</sup>), 3.97 (bd, 1H,  $J = 9.0$  Hz, H4<sup>B</sup>), 3.85 (t, 1H,  $J = 9.5$  Hz, H4<sup>A</sup>), 3.73 (t, 1H,  $J = 2.5$  Hz, H3<sup>B</sup>), 3.47 (s, 3H, CO<sub>2</sub>CH<sub>3</sub>), 3.45-3.44 (m, 1H, H5<sup>A</sup>), 3.34-3.30 (m, 1H, H2<sup>A</sup>), 3.22 (t, 1H,  $J = 9.0$  Hz, H3<sup>A</sup>), 2.80-2.73 [m, 4H, 2 x CH<sub>2</sub> Lev], 2.61-2.58 [m, 4H, 2 x CH<sub>2</sub> Lev], 2.19 (s, 3H, CH<sub>3</sub> Lev), 2.17 (s, 3H, CH<sub>3</sub> Lev), 1.67-1.63 [m, 1H, CH(CH<sub>3</sub>)<sub>2</sub>], 0.90-0.88 [4s, 12H, C(CH<sub>3</sub>)<sub>2</sub>, CH(CH<sub>3</sub>)<sub>2</sub>], 0.19-0.17 [2s, 6H, Si(CH<sub>3</sub>)<sub>2</sub>]. <sup>13</sup>C NMR (75.5 MHz, CDCl<sub>3</sub>): δ 206.5, 206.3, 172.1, 171.3, 169.4, 138.0, 137.3, 128.4, 128.3, 128.1, 128.1, 128.0, 127.9, 127.5, 127.3, 97.7, 97.0, 81.0, 77.4, 77.0, 76.6, 74.7, 74.5, 74.3, 72.3, 68.9, 68.4, 67.7, 67.3, 62.5, 51.9, 37.8, 37.8, 33.9, 33.7, 31.9, 30.1, 29.8, 29.7, 29.3, 27.9, 24.8, 19.9, 19.8, 18.4, 18.3, 14.1, -2.1, -3.2. HRMS-MALDI: (M + Na<sup>+</sup>) calcd. 936.3926, found 936.3956.

***N*-(Benzyl)-benzyloxycarbonyl-5-aminopentyl      *O*-(methyl-2-*O*-acetyl-3-*O*-benzyl-β-*D*-glucopyranosyluronate)-(1→4)-*O*-2-azido-3-*O*-benzyl-2-deoxy-6-*O*-acetyl-α-*D*-glucopyranoside (17):**

Compound **S17** (85 mg, 0.090 mmol) was subjected to TEMPO/BAIB mediated oxidation and esterification using diazomethane according to the general procedure. Silica gel chromatography of the residue (toluene/EtOAc, 50/50, v/v) afforded **17** (57.4 mg, 66%, two steps).  $[\alpha]_D^{25} +25.5$  ( $c = 1$ , CHCl<sub>3</sub>); <sup>1</sup>H NMR (500 MHz, CDCl<sub>3</sub>): δ 7.31-7.13 (m, 20H, CH Aromatic), 5.14-5.11 (m, 2H, CH<sub>2</sub> Cbz), 5.01 (d, 1H,  $J = 11.2$  Hz, CHHBn), 4.94 (t, 1H,  $J = 8.7$  Hz, H2<sup>B</sup>), 4.78 (d, 1H,  $J = 11.8$  Hz, CHHBn), 4.75 (bd, 1H,  $J = 12.0$  Hz, H1<sup>A</sup>), 4.69 (d, 1H,  $J = 11.2$  Hz, CHHBn), 4.64 (d, 1H,  $J = 11.8$  Hz, CHHBn), 4.53 (d, 1H,  $J = 7.9$  Hz, H1<sup>B</sup>), 4.45 (bd, 2H,  $J = 5.8$  Hz, NCH<sub>2</sub>Bn), 4.33 (bd, 1H,  $J = 11.7$  Hz, H6a<sup>A</sup>), 4.10 (bm, 1H, H6b<sup>A</sup>), 3.90-3.86 (m, 2H, H4<sup>B</sup>, H3<sup>A</sup>), 3.72-3.71 (m, 2H, H4<sup>A</sup>, H5<sup>A</sup>), 3.61-3.59 (bm, 2H, H5<sup>B</sup>, OCHH Linker), 3.48 (s,

3H, CO<sub>2</sub>CH<sub>3</sub>), 3.45 (t, 1H, *J* = 9.3 Hz, H3<sup>B</sup>), 3.36-3.17 (bm, 4H, OCHH Linker, CH<sub>2</sub>N Linker), 3.02 (d, 1H, *J* = 2.4 Hz, 4-OH), 2.03-1.98 (2s, 6H, 2 x CH<sub>3</sub> Ac), 1.55-1.19 (m, 6H, 3 x CH<sub>2</sub> Linker). <sup>13</sup>C NMR (75.4 MHz, CDCl<sub>3</sub>): δ 170.7, 169.6, 169.5, 138.8, 138.1, 128.8-127.5, 101.5, 97.9, 81.6, 78.7, 78.2, 77.7, 77.5, 77.3, 76.9, 75.0, 74.9, 74.5, 72.8, 72.3, 68.8, 68.7, 67.4, 63.1, 62.5, 60.6, 52.9, 50.8, 50.5, 47.3, 46.4, 29.2, 28.1, 23.5, 21.3, 21.1, 21.0. HRMS-MALDI: (M + Na<sup>+</sup>) calcd. 991.3952, found 991.3975.

***N*-(Benzyl)-benzyloxycarbonyl-5-aminopentyl *O*-(methyl-2-*O*-levulinoyl-3-*O*-benzyl-β-*D*-glucopyranosyluronate)-(1→4)-*O*-2-azido-3-*O*-benzyl-2-deoxy-6-*O*-acetyl-α-*D*-glucopyranoside (18):**

Compound **S18** (35 mg, 0.035 mmol) was subjected to TEMPO/BAIB mediated oxidation and esterification using diazomethane according to the general procedure. Silica gel chromatography of the residue (toluene/EtOAc, 50/50, v/v) afforded **18** (28 mg, 77%, two steps). [α]<sub>D</sub><sup>25</sup> 20.3 (*c* = 1, CHCl<sub>3</sub>); <sup>1</sup>H NMR (500 MHz, CDCl<sub>3</sub>): δ 7.36-7.24 (m, 20H, CH Aromatic), 5.16-5.11 (m, 2H, CH<sub>2</sub>Cbz), 5.08 (d, 1H, *J* = 11.5 Hz, CHHBn), 5.01 (m, 1H, H2<sup>B</sup>), 4.82 (bd, *J* = 12.0 Hz, 1H, H1<sup>A</sup>, CHHBn), 4.71-4.65 (m, 2H, CHHBn, CHHBn), 4.57 (d, 1H, *J* = 8.0 Hz, H1<sup>B</sup>), 4.49 (bs, 2H, NCH<sub>2</sub>Bn), 4.48 (dd, 1H, *J* = 2.0 Hz, *J* = 12.5 Hz, H6a<sup>A</sup>), 4.28 (dd, 1H, *J* = 4.5 Hz, *J* = 12.5 Hz, H6b<sup>A</sup>), 3.96-3.81 (m, 3H, H3<sup>A</sup>, H5<sup>A</sup>, H4<sup>B</sup>), 3.72 (t, 1H, *J* = 9.5 Hz, H5<sup>B</sup>), 3.68-3.64 (m, 2H, H4<sup>A</sup> OCHH Linker), 3.55-3.51 (m, 1H, H3<sup>B</sup>), 3.51 (s, 3H, CO<sub>2</sub>CH<sub>3</sub>), 3.41-3.36 (m, 1H, OCHH Linker), 3.27-3.20 (m, 3H, H2<sup>A</sup>, CH<sub>2</sub>N Linker), 2.94 (s, 1H, 4-OH), 2.79-2.74 (m, 0.5H, CHH Lev), 2.71-2.61 (m, 1.5H, CH<sub>2</sub> Lev), 2.56-2.36 (m, 0.5H, CHH Lev), 2.18 (bs, 6H, CH<sub>3</sub> Ac, CH<sub>3</sub> Lev), 1.61-1.26 (m, 6H, 3 x CH<sub>2</sub> Linker). <sup>13</sup>C NMR (75.5 MHz, CDCl<sub>3</sub>): δ 205.8, 171.3, 170.6, 169.2, 138.6, 138.1, 137.9, 128.4, 128.2, 127.8, 127.7, 127.7, 127.3, 101.2, 97.5, 81.4, 78.4, 78.0, 77.4, 76.9, 76.5, 74.8, 74.6, 74.1, 72.8, 72.0, 68.3, 68.1, 67.1, 62.8, 62.4,

52.6, 37.5, 37.3, 33.6, 33.3, 32.3, 31.9, 30.6, 30.1, 30.0, 29.6, 29.3, 28.9, 27.8, 27.7, 26.6, 26.3, 23.2, 23.1, 22.6, 22.6, 20.9, 14.1, 14.1. HRMS-MALDI: (M + Na<sup>+</sup>) calcd. 1047.4215, found 1047.4223.

***N*-(Benzyl)-benzyloxycarbonyl-5-aminopentyl *O*-(methyl-*O*-2-*O*-acetyl-3-*O*-benzyl- $\beta$ -D-glucopyranosyluronate)-(1 $\rightarrow$ 4)-*O*-2-azido-3-*O*-benzyl-2-deoxy-6-*O*-levulinoyl- $\alpha$ -D-**

**glucopyranoside (19):** Compound **S19** (1.79 g, 1.84 mmol) was subjected to TEMPO/BAIB mediated oxidation and esterification using diazomethane according to the general procedure. Silica gel chromatography of the residue (toluene/EtOAc, 50/50, v/v) afforded **19** (1.5 g, 79%, two steps).  $[\alpha]_D^{25} +47.3$  ( $c = 1$ , CHCl<sub>3</sub>); <sup>1</sup>H NMR (500 MHz, CDCl<sub>3</sub>):  $\delta$  7.37-7.18 (m, 20H, CH Aromatic), 5.19-5.13 (m, 2H, CH<sub>2</sub>Cbz, CHHBn), 5.02 (t, 1H,  $J = 8.5$  Hz, H2<sup>B</sup>), 4.86-4.80 (m, 1H, H1<sup>A</sup>, CHHBn), 4.71-4.65 (m, 3H, CHHBn, CHHBn, H1<sup>B</sup>), 4.48 (bd, 2H,  $J = 6.5$  Hz, NCH<sub>2</sub>Bn), 4.36 (bd, 1H,  $J = 11.5$  Hz, H6a<sup>A</sup>), 4.23 (d, 1H,  $J = 12.0$  Hz, H6b<sup>A</sup>), 4.02 (d, 1H,  $J = 9.5$  Hz, H5<sup>B</sup>), 3.97-3.86 (m, 3H, H3<sup>A</sup>, H4<sup>A</sup>, H4<sup>B</sup>), 3.76 (bs, 1H, H5<sup>A</sup>), 3.69 (t, 1H,  $J = 9.0$  Hz, H3<sup>B</sup>), 3.64-3.56 (m, 1H, OCHH), 3.50 (s, 3H, CO<sub>2</sub>CH<sub>3</sub>), 3.42-3.19 (m, 4H, H2<sup>A</sup>, CH<sub>2</sub>N Linker, OCHH Linker), 2.92-2.86 (m, 1H, CHH Lev), 2.70-2.61 (m, 2H, CH<sub>2</sub> Lev), 2.51-2.46 (m, 2H, CHH Lev), 2.18 (s, 3H, CH<sub>3</sub> Lev), 2.01 (s, 3H, CH<sub>3</sub> Ac), 1.61-1.56 (m, 2H, CH<sub>2</sub> Linker), 1.34-1.26 (m, 2H, CH<sub>2</sub> Linker). <sup>13</sup>C NMR (75.5 MHz, CDCl<sub>3</sub>):  $\delta$  206.7, 172.4, 169.6, 169.4, 138.6, 138.3, 137.9, 128.5, 128.4, 128.2, 127.9, 127.8, 127.7, 127.6, 127.5, 127.3, 101.0, 97.7, 81.3, 78.2, 77.8, 77.4, 77.0, 76.6, 75.0, 74.5, 74.0, 72.5, 72.3, 68.6, 68.3, 67.1, 62.8, 62.2, 52.5, 50.5, 50.2, 47.0, 46.1, 37.8, 29.8, 28.9, 27.8, 23.2, 20.8. HRMS-MALDI: (M + Na<sup>+</sup>) calcd. 1047.4215, found 1047.4223.

***N*-(Benzyl)-benzyloxycarbonyl-5-aminopentyl      *O*-(methyl-*O*-2-*O*-levulinoyl-3-*O*-benzyl- $\beta$ -D-glucopyranosyluronate)-(1 $\rightarrow$ 4)-*O*-2-azido-3-*O*-benzyl-2-deoxy-6-*O*-levulinoyl- $\alpha$ -D-glucopyranoside (20):** Compound **S20** (100 mg, 0.097 mmol) was subjected to TEMPO/BAIB mediated oxidation and esterification using diazomethane according to the general procedure. Silica gel chromatography of the residue (toluene/EtOAc, 50/50, v/v) afforded **20** (70 mg, 67%, two steps).  $[\alpha]_D^{25}$  -18.4 ( $c$  =1, CHCl<sub>3</sub>); <sup>1</sup>H NMR (500 MHz, CDCl<sub>3</sub>):  $\delta$  7.39-7.26 (m, 20H, CH Aromatic), 5.19-5.15 (m, 2H, CHHBn, CH<sub>2</sub> Cbz), 5.02 (t, 1H,  $J$  = 8.0 Hz, H2<sup>B</sup>), 4.83 (bd, 1H,  $J$  = 12.0 Hz, H1<sup>A</sup>, CHHBn), 4.71-4.65 (m, 3H, CHHBn, CHHBn, H1<sup>B</sup>), 4.48 (dd, 1H,  $J$  = 2.0 Hz,  $J$  = 12.5 Hz, H6a<sup>A</sup>), 4.48 (bd, 2H,  $J$  = 8.0 Hz, NCH<sub>2</sub>Bn), 4.28 (d, 1H,  $J$  = 11.0 Hz, H6b<sup>A</sup>), 4.10 (d, 1H,  $J$  = 10.0 Hz, H5<sup>B</sup>), 4.01 (bd, 1H,  $J$  = 8.5 Hz, H5<sup>A</sup>), 3.96-3.89 (m, 3H, H3<sup>A</sup>, H4<sup>A</sup>, H4<sup>B</sup>), 3.72 (t, 1H,  $J$  = 9.0 Hz, H3<sup>B</sup>), 3.68-3.64 (m, 1H, OCHH Linker), 3.47 (s, 3H, CO<sub>2</sub>CH<sub>3</sub>), 3.39-3.19 (m, 4H, H2<sup>A</sup>, CH<sub>2</sub>N Linker, OCHH Linker ), 2.92-2.79 (m, 2H, CH<sub>2</sub> Lev), 2.71-2.61 (m, 4H, 2 x CH<sub>2</sub> Lev), 2.56-2.36 (m, CH<sub>2</sub> Lev), 2.18 (s, 3H, CH<sub>3</sub> Lev), 2.11 (bd, 3H,  $J$  = 10.1 Hz, CH<sub>3</sub> Lev), 1.61-1.56 (m, 6H, 3 x CH<sub>2</sub> Linker. <sup>13</sup>C NMR (75.5 MHz, CDCl<sub>3</sub>):  $\delta$  206.8, 205.8, 172.5, 169.7, 138.8, 138.4, 137.9, 136.8, 128.5, 128.4, 128.3, 128.1, 127.8, 127.8, 127.5, 127.2, 101.0, 97.7, 81.4, 78.3, 77.9, 77.4, 77.0, 76.6, 75.2, 74.5, 74.0, 72.8, 72.3, 68.3, 68.1, 67.1, 62.8, 62.6, 52.4, 50.5, 50.2, 46.1, 37.9, 37.5, 29.8, 29.7, 29.6, 28.9, 27.8, 27.7, 23.2. HRMS-MALDI: (M + Na<sup>+</sup>) calcd. 1103.4477, found 1103.4456.

***N*-(Benzyl)-benzyloxycarbonyl-5-aminopentyl      *O*-(methyl-3-*O*-benzyl-2-*O*-acetyl)- $\alpha$ -L-idopyranosyluronate)-(1 $\rightarrow$ 4)-*O*-2-azido-3-*O*-benzyl-2-deoxy-6-*O*-acetyl- $\alpha$ -D-glucopyranoside (21):** Compound **S21** (80 mg, 0.087 mmol) was subjected to TEMPO/BAIB mediated oxidation and esterification using diazomethane according to the general procedure. Silica gel chromatography (toluene/EtOAc, 50/50, v/v) afforded **21** (70 mg, 83%, two steps).

$[\alpha]_D^{25} +98.3$  ( $c = 1$ ,  $\text{CHCl}_3$ );  $^1\text{H NMR}$  (500 MHz,  $\text{CDCl}_3$ ):  $\delta$  7.36-7.26 (m, 20H, CH Aromatic), 5.17 (bd, 2H,  $J = 14.0$  Hz,  $\text{CH}_2$  Cbz), 5.07 (s, 1H,  $\text{H1}^{\text{B}}$ ), 4.98-4.90 (m, 1H,  $\text{H2}^{\text{B}}$ ,  $\text{H5}^{\text{B}}$ ), 4.84 (bd, 2H,  $J = 14.5$  Hz,  $\text{H1}^{\text{A}}$ ), 4.74 (bd, 2H,  $J = 11.0$  Hz,  $\text{CHHBn}$ ,  $\text{CHHBn}$ ), 4.66-4.62 (m, 2H,  $\text{CHHBn}$ ,  $\text{CHHBn}$ ), 4.49-4.47(m, 2H,  $\text{NCH}_2\text{Bn}$ ,  $\text{H6a}^{\text{A}}$ ), 4.22 (bd, 1H,  $J = 12.0$  Hz,  $\text{H6b}^{\text{A}}$ ), 3.95 (bs, 1H,  $\text{H4}^{\text{B}}$ ), 3.86-3.82 (m, 3H,  $\text{H4}^{\text{A}}$ ,  $\text{H3}^{\text{A}}$ ), 3.71 (bs, 1H,  $\text{H3}^{\text{B}}$ ), 3.65-3.52 (m, 2H,  $\text{OCHH}$  Linker,  $\text{H5}^{\text{A}}$ ), 3.47 (s, 3H,  $\text{CO}_2\text{CH}_3$ ), 3.40-3.18 (m, 4H incl.: d,  $J = 9.0$  Hz at 3.27,  $\text{H2}^{\text{A}}$ ,  $\text{OCHH}$  Linker,  $\text{CH}_2\text{N}$  Linker), 2.06 (s, 3H,  $\text{CH}_3$  Ac), 2.07 (s, 3H,  $\text{CH}_3$  Ac), 1.61-1.19 (m, 6H, 3 x  $\text{CH}_2$  Linker). HRMS-MALDI: ( $\text{M} + \text{Na}^+$ ) calcd. 991.3952, found 991.3975.

***N*-(Benzyl)-benzyloxycarbonyl-5-aminopentyl *O*-(methyl-3-*O*-benzyl-2-*O*-levulinoyl)- $\alpha$ -L-idopyranosyluronate)-(1 $\rightarrow$ 4)-*O*-2-azido-3-*O*-benzyl-2-deoxy-6-*O*-acetyl- $\alpha$ -D-glucopyranoside (**22**):**

Compound **S22** (84.7 mg, 0.087 mmol) was subjected to TEMPO/BAIB mediated oxidation and esterification using diazomethane according to the general procedure. Silica gel chromatography (toluene/EtOAc, 9/1 to 1/1, v/v) afforded **22** (65.6 mg, 73%, two steps).  $[\alpha]_D^{25} 21.1$  ( $c = 1$ ,  $\text{CHCl}_3$ );  $^1\text{H NMR}$  (500 MHz,  $\text{CDCl}_3$ ):  $\delta$  7.32-7.13 (m, 20H, CH Aromatic), 5.13 (bd, 2H,  $J = 13.2$  Hz,  $\text{CH}_2$  Cbz), 5.03 (s, 1H,  $\text{H1}^{\text{B}}$ ), 4.90 (bs, 1H,  $\text{H2}^{\text{B}}$ ), 4.83-4.79 (m, 2H,  $\text{H5}^{\text{B}}$ ,  $\text{H1}^{\text{A}}$ ), 4.72-4.70 (m, 2H,  $\text{CHHBn}$ ,  $\text{CHHBn}$ ), 4.61-4.57 (m, 2H,  $\text{CHHBn}$ ,  $\text{CHHBn}$ ), 4.46 (bd, 2H,  $J = 7.0$  Hz,  $\text{NCH}_2\text{Bn}$ ), 4.35 (bd, 1H,  $J = 12.5$  Hz,  $\text{H6a}^{\text{A}}$ ), 4.19 (bd, 1H,  $J = 12.5$  Hz,  $\text{H6b}^{\text{A}}$ ), 3.93 (bd, 1H,  $J = 9.2$  Hz,  $\text{H4}^{\text{B}}$ ), 3.86-3.78 (m, 3H,  $\text{H4}^{\text{A}}$ ,  $\text{H3}^{\text{A}}$ ,  $\text{H5}^{\text{A}}$ ), 3.69 (bs, 1H,  $\text{H3}^{\text{B}}$ ), 3.63-3.53 (m, 1H,  $\text{OCHH}$  Linker), 3.43 (s, 3H,  $\text{CO}_2\text{CH}_3$ ), 3.40-3.18 (m, 4H incl.: dd,  $J = 3.5$  Hz,  $J = 10.3$  Hz at 3.27,  $\text{H2}^{\text{A}}$ ,  $\text{OCHH}$  Linker,  $\text{CH}_2\text{N}$  Linker), 2.69-2.63 (m, 4H, 2 x  $\text{CH}_2$  Lev), 2.51-2.49 (m, 2H, 2 x  $\text{CH}_2$  Lev), 2.05 (s, 3H,  $\text{CH}_3$  Ac), 2.11 (s, 3H,  $\text{CH}_3$  Lev), 1.61-1.19 (m, 6H, 3 x  $\text{CH}_2$  Linker).  $^{13}\text{CNMR}$ (75.5 MHz,  $\text{CDCl}_3$ ):  $\delta$  206.1, 172.3, 171.1, 170.6, 169.5, 156.1, 137.8,



137.8, 137.3, 136.8, 128.5, 128.4, 128.1, 128.1, 128.0, 127.8, 127.3, 127.3, 97.9, 97.6, 78.3, 77.5, 77.2, 77.0, 76.6, 75.0, 74.6, 74.3 72.3, 69.0, 68.7, 68.2, 67.5, 67.1, 63.3, 62.2, 60.3, 51.9, 50.5, 50.2, 47.0, 46.1, 37.7, 29.6, 29.0, 27.9, 27.4, 23.2, 21.0, 20.8, 14.1. HRMS-MALDI: (M + Na<sup>+</sup>) calcd. 1047.4215, found 1047.4223.

***N*-(Benzyl)-benzyloxycarbonyl-5-aminopentyl      *O*-(methyl-2-*O*-acetyl-3-*O*-benzyl- $\alpha$ -L-idopyranosyluronate)-(1 $\rightarrow$ 4)-*O*-2-azido-3-*O*-benzyl-6-*O*-levulinoyl- $\alpha$ -D-glucopyranoside**

(**23**): Compound **S23** (263 mg, 0.211 mmol) was subjected to TEMPO/BAIB mediated oxidation and esterification using diazomethane according to the general procedure. Silica gel chromatography of the residue (toluene/EtOAc 1/1 to 1/2, v/v) afforded **23** (210 mg, 97%).  $[\alpha]_D^{25} +23.4$  ( $c = 1$ , CHCl<sub>3</sub>); <sup>1</sup>H NMR (500 MHz, CDCl<sub>3</sub>):  $\delta$  7.42-7.19 (m, 20H, Aromatic), 5.23-5.15 (m, 2H, CH<sub>2</sub> Cbz), 5.04 (bs, 1H, H1<sup>B</sup>), 4.96 (bs, 1H, H2<sup>B</sup>), 4.92 (bs, 1H, H5<sup>B</sup>), 4.89-4.83 (m, 1H, H1<sup>A</sup>), 4.80-4.73 (m, 2H, CHHBn, CHHBn), 4.69-4.62 (m, 2H, CHHBn, CHHBn), 4.55-4.48 (bs, 2H, NCH<sub>2</sub>Bn), 4.44 (dd, 1H,  $J = 1.5$  Hz,  $J = 12.2$  Hz, H6a<sup>A</sup>), 4.24 (bd, 1H, H6b<sup>A</sup>), 3.93 (bs, 1H, H4<sup>B</sup>), 3.94-3.78 (m, 3H, H3<sup>A</sup>, H4<sup>A</sup>, H5<sup>A</sup>), 3.74 (t, 1H,  $J = 2.5$ Hz, H3<sup>B</sup>), 3.70-3.59 (m, 1H, OCHH Linker), 3.52- 3.18 (7H incl. CO<sub>2</sub>CH<sub>3</sub>: s, 3.48, H2<sup>A</sup>: dd, 3.33,  $J = 3.3$  Hz,  $J = 10.0$ Hz, OCHH Linker, CH<sub>2</sub>N Linker), 2.82-2.75 (m, 2H, CH<sub>2</sub> Lev), 2.72-2.55 (m, 2H CH<sub>2</sub> Lev), 2.20 (s, 3H, CH<sub>3</sub> Lev), 2.10 (s, 3H, CH<sub>3</sub> Ac), 1.72-1.40 (m, 4H, CH<sub>2</sub> Linker), 1.40-1.20 (m, 2H, CH<sub>2</sub> Linker). <sup>13</sup>C NMR (75.5 MHz, CDCl<sub>3</sub>):  $\delta$  201.4172.3, 168.4 168.3, 156.6, 156.4, 136.9, 136.8 136.2, 127.5, 127.4, 127.2, 127.1, 126.9, 126.8, 126.4, 126.3, 96.8, 96.6, 77.3, 73.7, 73.4, 71.2, 68.0, 67.4, 67.2, 66.7, 66.1, 66.0, 62.4, 61.4, 51.0, 49.9, 46.8, 46.0, 36.8, 28.8, 28.0, 26.9, 22.3, 29.9. HRMS-MALDI: (M + Na<sup>+</sup>) calcd. 1047.4215, found 1047.4223.

***N*-(Benzyl)-benzyloxycarbonyl-5-aminopentyl *O*-(methyl 2-*O*-levulinoyl-3-*O*-benzyl- $\alpha$ -L-idopyranosyluronate)-(1 $\rightarrow$ 4)-*O*-2-azido-3-*O*-benzyl-6-*O*-levulinoyl- $\alpha$ -D-glycopyranoside (24):** Compound **S24** (400 mg, 0.380 mmol) was subjected to TEMPO/BAIB mediated oxidation and esterification using diazomethane according to the general procedure. Silica gel chromatography (toluene/EtOAc 1/1, v/v) provided **24** (299 mg, 73%).  $[\alpha]_D^{25} +28$  ( $c = 1$ , CHCl<sub>3</sub>); <sup>1</sup>H NMR (500MHz, CDCl<sub>3</sub>):  $\delta$  7.40-7.15 (m, 20H, CH Aromatic), 5.18-5.12 (m, 2H, CH<sub>2</sub> Cbz), 4.99 (bs, 1H, H1<sup>B</sup>), 4.92 (bs, 1H, H2<sup>B</sup>), 4.86, 4.78 (m, 2H, H1<sup>A</sup>, H5<sup>B</sup>), 4.75-4.70 (m, 2H, CHHBn, CHHBn), 4.62-4.58 (m, 2H, CHHBn, CHHBn), 4.51-4.45 (m, 2H, NCH<sub>2</sub>Bn), 4.39 (dd, 1H,  $J = 1.5$  Hz,  $J = 12.3$ Hz, H6a<sup>A</sup>), 4.20 (bd, 1H,  $J = 12.3$  Hz, H6b<sup>A</sup>), 3.94 (bd, 1H,  $J = 10.5$  Hz, H4<sup>B</sup>), 3.88 (t, 1H,  $J = 9.1$ Hz, H4<sup>A</sup>), 3.85-3.74 (m, 2H, H3<sup>A</sup>, H5<sup>A</sup>), 3.71 (t, 1H,  $J = 2.7$  Hz, H3<sup>B</sup>), 3.68-3.54 (m, 1H, OCHH Linker), 3.45 (s, 3H, CO<sub>2</sub>CH<sub>3</sub>), 3.44 –3.17 (m, 3H, incl. H2<sup>A</sup>: dd, 3.36,  $J = 3.5$  Hz,  $J = 10.1$  Hz, OCHH Linker), 2.80-2.50 (m, 8H, 4 x CH<sub>2</sub> Lev), 2.16 (s, 3H, CH<sub>3</sub> Lev), 2.14 (s, 3H, CH<sub>3</sub> Lev), 1.64-1.48 (m, 4H, CH<sub>2</sub> Linker), 1.38-1.24 (m, 2H, CH<sub>2</sub> Linker). <sup>13</sup>C NMR (CDCl<sub>3</sub>):  $\delta$  206.6, 206.3, 172.2, 171.4, 169.4, 156.6, 156.1, 137.9, 137.8, 137.2, 136.8, 128.5, 128.4, 128.1, 127.9, 127.8, 127.4, 127.3, 97.7, 97.5, 78.3, 74.5, 74.4, 72.3, 68.9, 68.5, 68.1, 67.6, 67.4, 67.1, 63.3, 62.4, 51.9, 50.5, 50.2, 47.0, 46.1, 37.8, 37.7, 29.8, 29.7, 28.0, 27.9, 23.2. HRMS-MALDI: (M + Na<sup>+</sup>) calcd. 1103.4477, found 1103.4456.

**Dimethylthexylsilyl *O*-(methyl-2-*O*-acetyl-3-*O*-benzyl-4-*O*-(9-fluorenylmethoxycarbonyl)- $\beta$ -D-glucopyranosyluronate)-(1 $\rightarrow$ 4)-*O*-2-azido-3-*O*-benzyl-2-deoxy-6-*O*-acetyl- $\beta$ -D-glucopyranoside (9):** Disaccharide **41** (63 mg, 0.078 mmol) was prepared according to the general procedure for synthesis of Fmoc protected disaccharides. Silica gel chromatography (toluene/EtOAc, 95/5 to 90/10, v/v) afforded **9** (50 mg, 62%).  $[\alpha]_D^{25} +34.3$  ( $c = 1$ , CHCl<sub>3</sub>); <sup>1</sup>H

NMR (500 MHz, CDCl<sub>3</sub>):  $\delta$  7.36-7.25 (m, 20H, CH Aromatic), 5.06-5.00 (m, 2H, H4<sup>B</sup>, H2<sup>B</sup>), 4.95 (d, 1H,  $J = 12.0$ , CHHBn), 4.82 (d, 1H,  $J = 12.0$  Hz, CHHBn), 4.66 (d, 1H,  $J = 11.5$  Hz, CHHBn), 4.62 (d, 1H,  $J = 8.0$  Hz, H1<sup>B</sup>), 4.53 (d, 1H,  $J = 12.0$  Hz, CHHBn), 4.46 (d, 1H,  $J = 7.5$  Hz, H1<sup>A</sup>), 4.42 (dd, 1H,  $J = 7.0$  Hz,  $J = 10.5$  Hz, CHH Fmoc), 4.37-4.31 (m, 2H, CHH Fmoc, H6b<sup>A</sup>), 4.20 (t, 1H,  $J = 7.5$  Hz, CH Fmoc), 4.08 (dd, 1H,  $J = 6.5$  Hz,  $J = 11.5$  Hz, H6a<sup>A</sup>), 3.82 (d, 1H, H5<sup>B</sup>), 3.71 (t, 1H,  $J = 9.0$  Hz, H3<sup>B</sup>), 3.64 (t, 1H,  $J = 9.5$  Hz, H4<sup>A</sup>), 3.46 (s, 1H, CO<sub>2</sub>CH<sub>3</sub>), 3.47-3.44 (m, 1H, H5<sup>A</sup>), 3.39 (t, 1H,  $J = 9.5$  Hz, H3<sup>A</sup>), 3.30-3.26 (m, 1H, H2<sup>A</sup>), 2.05 (s, 3H, CH<sub>3</sub> Ac), 1.92 (s, 3H, CH<sub>3</sub> Ac), 1.66-1.61 [m, 1H, CH(CH<sub>3</sub>)<sub>2</sub>], 0.88-0.86 [4s, 12H, C(CH<sub>3</sub>)<sub>2</sub>, CH(CH<sub>3</sub>)<sub>2</sub>], 0.16-0.15 [2s, 6H, Si(CH<sub>3</sub>)<sub>2</sub>]. HRMS-MALDI: (M + Na<sup>+</sup>) calcd. 1046.4082, found 1046.4091.

#### Dimethylthexylsilyl

#### *O*-(methyl-2-*O*-levulinoyl-3-*O*-benzyl-4-*O*-(9-*O*-

#### fluorenylmethoxycarbonyl)- $\beta$ -D-glucopyranosyluronate)-(1 $\rightarrow$ 4)-*O*-2-azido-3-*O*-benzyl-2-

deoxy-6-*O*-cetyl- $\beta$ -D-glucopyranoside (**10**): Disaccharide **42** (20 mg, 0.023 mmol) was prepared according to the general procedure for synthesis of Fmoc protected disaccharides. Silica gel chromatography (toluene/EtOAc 95/5 to 90/10, v/v) afforded **10** (17 mg, 68%).  $[\alpha]_D^{25}$ -9.6 (c = 1, CHCl<sub>3</sub>); <sup>1</sup>H NMR (500 MHz, CDCl<sub>3</sub>):  $\delta$  7.60-7.02(m, 20H, CH Aromatic), 4.93-4.87 (m, 2H, H4<sup>B</sup>, H2<sup>B</sup>), 4.81 (d, 1H,  $J = 11.5$  Hz, CHHBn), 4.63 (d, 1H,  $J = 11.5$  Hz, CHHBn), 4.47-4.46(m, 2H, CHHBn, H1<sup>B</sup>), 4.42 (d, 1H,  $J = 12.0$  Hz, CHHBn), 4.33 (d, 1H,  $J = 8.0$  Hz, H1<sup>A</sup>), 4.27-4.22 (m, 2H, CHH Fmoc, H6a<sup>A</sup>), 4.17-4.13 (m, 1H, CHHFmoc), 4.04 (t, 1H,  $J = 7.0$  Hz, CH Fmoc), 3.96 (dd, 1H,  $J = 6.5$  Hz,  $J = 12.0$  Hz, H6b<sup>A</sup>), 3.68 (d, 1H,  $J = 10.0$  Hz, H5<sup>B</sup>), 3.57 (t, 1H,  $J = 9.5$  Hz, H3<sup>B</sup>), 3.52 (t, 1H,  $J = 8.5$  Hz, H4<sup>A</sup>), 3.42-3.39 (m, 1H, H5<sup>A</sup>), 3.31 (s, 3H, CO<sub>2</sub>CH<sub>3</sub>), 3.21 (t, 1H,  $J = 8.5$  Hz, H3<sup>A</sup>), 3.13 (t, 1H,  $J = 8.0$  Hz, H2<sup>A</sup>), 2.61-2.55 (m, 1H, CHH

Lev), 2.50-2.36 (m, 2H,  $CH_2$  Lev), 2.23-2.17 (m, 1H,  $CHH$  Lev), 1.99 (s, 3H,  $CH_3$  Lev), 1.19 (s, 3H,  $CH_3$  Ac), 1.51-1.45[m, 1H,  $CH(CH_3)_2$ ], 0.72-0.70 [4s, 12H,  $C(CH_3)_2$  and  $CH(CH_3)_2$ ], 0.014-0.00 [2s, 6H,  $Si(CH_3)_2$ ].  $^{13}C$  NMR (75.5 MHz,  $CDCl_3$ ):  $\delta$  206.0, 171.2, 170.6, 168.6, 167.0, 153.9, 143.2, 142.9, 141.3, 138.6, 137.5, 128.3, 128.2, 127.9, 127.7, 127.7, 127.3, 127.2, 125.1, 125.0, 120.1, 101.0, 96.7, 81.0, 79.4, 78.7, 77.4, 77.06, 76.6, 75.0, 74.8, 74.4, 72.5, 72.4, 68.7, 62.7, 61.0, 58.3, 52.6, 46.6, 37.5, 33.9, 29.8, 29.7, 27.6, 24.8, 20.8, 19.9, 19.8, 18.4, 18.3, -2.2, -3.2. HRMS-MALDI: ( $M + Na^+$ ) calcd. 1102.4344, found 1102.4363.

**Dimethylthexylsilyl *O*-(methyl-2-*O*-acetyl-3-*O*-benzyl-4-*O*-(9-fluorenylmethoxycarbonyl)- $\beta$ -D-glucopyranosyluronate)-(1 $\rightarrow$ 4)-*O*-2-azido-3-*O*-benzyl-2-deoxy-6-*O*-levulinoyl- $\beta$ -D-glucopyranoside) (11):**

Disaccharide **43** (30 mg, 0.033 mmol) was prepared according to the general procedure for synthesis of Fmoc protected disaccharides. Silica gel chromatography of the residue (toluene/EtOAc, 95/5 to 90/10, v/v) afforded **11** (30 mg, 81%).  $[\alpha]_D^{25} +14.2$  ( $c = 1$ ,  $CHCl_3$ );  $^1H$  NMR (500 MHz,  $CDCl_3$ ):  $\delta$  7.60-7.02. (m, 20H, CH Aromatic), 4.93-4.87 (m, 3H,  $H4^B$ ,  $H2^B$ ,  $CHHBn$ ), 4.60 (d, 1H,  $J = 12.0$  Hz,  $CHHBn$ ), 4.55 (d, 1H,  $J = 8.0$  Hz,  $H1^B$ ), 4.51 (d, 1H,  $J = 11.5$  Hz,  $CHHBn$ ), 4.40 (d, 1H,  $J = 12.0$  Hz,  $CHHBn$ ), 4.30 (d, 1H,  $J = 7.5$  Hz,  $H1^A$ ), 4.25 (dd, 1H,  $J = 7.0$  Hz,  $J = 10.5$  Hz,  $CHH$  Fmoc), 4.16-4.13 (m, 2H,  $CHH$  Fmoc,  $H6a^A$ ), 4.06-4.00 (m, 2H,  $H6b^A$ ,  $CH$  Fmoc), 3.95-3.86 (m, 1H,  $H5^B$ ), 3.73 (t, 1H,  $J = 9.5$  Hz,  $H3^B$ ), 3.60 (t, 1H,  $J = 9.5$  Hz,  $H4^A$ ), 3.30 (s, 3H,  $CO_2CH_3$ ), 3.26-3.24 (m, 1H,  $H5^A$ ), 3.21 (t, 1H,  $J = 9.0$  Hz,  $H3^A$ ), 3.12 (t, 1H,  $J = 8.0$  Hz,  $H2^A$ ), 2.72-2.66 (m, 1H,  $CHH$  Lev), 2.58-2.52 (m, 1H,  $CHH$  Lev), 2.49-2.42 (m, 1H,  $CHH$  Lev), 2.39-2.33 (m, 1H,  $CHH$  Lev), 2.19 (s, 3H,  $CH_3$  Lev), 2.04 (s, 3H,  $CH_3$  Ac), 1.67-1.61 [m, 1H,  $CH(CH_3)_2$ ], 0.88-0.86 [4s, 12H,  $C(CH_3)_2$  and  $CH(CH_3)_2$ ], 0.16-0.15 [2s, 6H,  $Si(CH_3)_2$ ].  $^{13}C$  NMR (75.5 MHz,  $CDCl_3$ ):  $\delta$  206.5, 172.4, 169.2, 167.2, 154.0, 143.3,

143.0, 141.2, 138.6, 137.6, 128.3, 128.2, 127.9, 127.7, 127.6, 127.5, 127.3, 127.1, 125.1, 125.0, 120.0, 100.9, 96.8, 80.8, 79.4, 78.3, 77.4, 77.0, 76.6, 75.2, 75.0, 74.3, 72.5, 72.4, 72.3, 70.3, 68.6, 62.4, 52.6, 46.6, 37.9, 33.9, 29.8, 29.7, 27.8, 24.8, 20.7, 19.9, 19.8, 18.4, 18.3, -2.1, -3.2. HRMS-MALDI: (M + Na<sup>+</sup>) calcd. 1102.4344, found 1102.4363.

### Dimethylthexylsilyl

### *O*-(methyl-2-*O*-levulinoyl-3-*O*-benzyl-4-*O*-(9-

### fluorenylmethoxycarbonyl)- $\beta$ -D-glucopyranosyluronate)-(1 $\rightarrow$ 4)-*O*-2-azido-3-*O*-benzyl-2-

deoxy-6-*O*-levulinoyl- $\beta$ -D-glucopyranoside (**12**): Disaccharide **44** (40 mg, 0.043 mmol) was prepared according to the general procedure for synthesis of Fmoc protected disaccharides. Silica gel chromatography of the residue (toluene/EtOAc, 95/5 to 90/10, v/v) afforded **12** (40 mg, 82%).  $[\alpha]_D^{25} +15.5$  (c = 1, CHCl<sub>3</sub>); <sup>1</sup>H NMR (500 MHz, CDCl<sub>3</sub>):  $\delta$  7.75-7.20 (m, 25H, CH Aromatic), 5.10-5.04 (m, 3H, H4<sup>B</sup>, H2<sup>B</sup>, CHHBn), 4.74-4.71(m, 2H, CHHBn, H1<sup>B</sup>), 4.66 (d, *J* = 11.5 Hz, 1H, CHHBn), 4.60 (d, *J* = 11.5 Hz, 1H, CHHBn), 4.47 (d, *J* = 7.5 Hz, 1H, H1<sup>A</sup>), 4.40 (dd, *J* = 7.0 Hz, *J* = 10.5 Hz, 1H, H6a<sup>A</sup>), 4.34 (dd, *J* = 1.5 Hz, *J* = 11.5 Hz, 1H, H6b<sup>A</sup>), 4.30-4.26 (m, 2H, CHH Fmoc, CHH Fmoc), 4.20 (t, 1H, *J* = 7.5 Hz, CH Fmoc), 3.14 (d, 1H, *J* = 10.0 Hz, H5<sup>B</sup>), 3.89 (t, 1H, *J* = 9.5 Hz, H3<sup>B</sup>), 3.76 (t, 1H, *J* = 8.5 Hz, H4<sup>A</sup>), 3.42-3.40 (m, 1H, H5<sup>A</sup>), 3.46 (s, 3H, CO<sub>2</sub>CH<sub>3</sub>), 3.37 (t, 1H, *J* = 9.5 Hz, H3<sup>A</sup>), 3.27 (t, 1H, *J* = 8.0 Hz, H2<sup>A</sup>), 2.88-2.49 (m, 8H, 4 x CH<sub>2</sub> Lev) 2.21 (s, 3H, CH<sub>3</sub> Lev), 1.15 (s, 3H, CH<sub>3</sub> Lev), 1.66-1.61 [m, 1H, CH(CH<sub>3</sub>)<sub>2</sub>], 0.88-0.86 [4s, 12H, C(CH<sub>3</sub>)<sub>2</sub> and CH(CH<sub>3</sub>)<sub>2</sub>], 0.16-0.15 [2s, 6H, Si (CH<sub>3</sub>)<sub>2</sub>]. <sup>13</sup>C NMR (75.5 MHz, CDCl<sub>3</sub>):  $\delta$  206.6, 206.0, 172.5, 171.2, 167.3, 154.0, 143.3, 143.0, 141.2, 138.7, 137.8, 128.5, 128.2, 128.1, 127.9, 127.6, 127.5, 127.3, 127.1, 126.2, 126.1, 125.8, 125.1, 125.0, 120.0, 100.8, 96.8, 80.9, 79.5, 78.2, 77.9, 77.4, 77.0, 76.6, 75.1, 74.4, 72.7, 72.3, 72.2, 70.3, 68.6, 67.3, 62.7,

62.6, 52.5, 46.5, 37.5, 33.9, 29.7, 27.9, 27.6, 24.8, 19.9, 19.8, 18.4, 18.3, -2.1, -3.2. HRMS-MALDI: (M + Na<sup>+</sup>) calcd. 1135.4709, found 1135.4715.

**Dimethylthexylsilyl *O*-(methyl-2-*O*-acetyl-3-*O*-benzyl-4-*O*-(9-fluorenylmethoxycarbonyl) - $\alpha$ -L-idopyranosyluronate)-(1 $\rightarrow$ 4)-*O*-2-azido-3-*O*-benzyl-2-deoxy-6-*O*-acetyl- $\alpha$ -D-**

**glucopyranoside (13):** Disaccharide **53** (19.3 mg, 0.023 mmol) was prepared according to the general procedure for synthesis of Fmoc protected disaccharides. Silica gel chromatography (Toluene/EtOAc, 95/5 to 90/10) afforded **13** (18 mg, 76%).  $[\alpha]_D^{25}$  -32.4 ( $c = 0.7$ , CHCl<sub>3</sub>); <sup>1</sup>H NMR (500 MHz, CDCl<sub>3</sub>):  $\delta$  7.74-7.73 (m, 2H, CH Aromatic), 7.55-7.54 (m, 2H, CH Aromatic), 7.39-7.21 (m, 25H, CH Aromatic), 5.13 (bs, 1H, H1<sup>B</sup>), 4.99-4.98 (m, 2H, H5<sup>B</sup>, H4<sup>B</sup>), 4.85 (bs, 1H, H2<sup>B</sup>), 4.73-4.69 (m, CHHBn, CHHBn, CHHBn), 4.61 (d, 1H,  $J = 11.0$  Hz, CHHBn), 4.53-4.48 (m, 2H, H1<sup>A</sup>, H6a<sup>A</sup>), 4.42 (dd, 1H,  $J = 7.3$  Hz,  $J = 10.4$  Hz, CHH Fmoc), 4.33 (dd, 1H,  $J = 7.3$  Hz,  $J = 10.4$  Hz, CHH Fmoc), 4.19 (t, 1H,  $J = 7.3$  Hz, CH Fmoc), 4.12 (dd, 1H,  $J = 5.3$  Hz,  $J = 12.0$  Hz, H6b<sup>A</sup>), 3.86-3.83 (m, 2H, H3<sup>B</sup>, H4<sup>A</sup>), 3.45-3.44 (m, 4H incl. s at 3.44 : CO<sub>2</sub>CH<sub>3</sub>, H5<sup>A</sup>), 3.33 (t, 1H,  $J = 7.8$  Hz,  $J = 9.8$  Hz, H2<sup>A</sup>), 3.23 (t, 1H,  $J = 9.3$  Hz,  $J = 9.6$  Hz, H3<sup>A</sup>), 2.06-1.96 (s, 6H, CH<sub>3</sub> Ac), 1.65-1.53 [m, 1H, CH(CH<sub>3</sub>)<sub>2</sub>], 0.88-0.75 [4s, 12H, C(CH<sub>3</sub>)<sub>2</sub> and CH(CH<sub>3</sub>)<sub>2</sub>], 0.17-0.16 [2s, 6H, Si(CH<sub>3</sub>)<sub>2</sub>]. <sup>13</sup>C NMR (75.5 MHz, CDCl<sub>3</sub>):  $\delta$  170.5, 169.9, 168.3, 154.2, 143.2, 143.0, 141.3, 141.3, 137.9, 137.2, 128.5, 128.2, 128.1, 128.0, 127.9, 127.7, 127.5, 127.4, 127.2, 127.1, 125.1, 125.0, 120.1, 97.5, 97.0, 80.9, 80.6, 77.4, 77.2, 77.0, 76.6, 74.7, 73.3, 72.8, 72.8, 72.6, 71.2, 70.2, 68.9, 67.3, 66.8, 62.2, 52.2, 46.6, 33.9, 29.7, 24.8, 2 20.8, 20.8, 19.9, 19.8, 18.5, 18.3, -2.2, -3.3. HRMS-MALDI: (M + Na<sup>+</sup>) calcd. 1046.4082, found 1046.4091.

**Dimethylhexylsilyl *O*-(methyl-3-*O*-benzyl-4-*O*-(9-fluorenylmethoxycarbonyl)-2-*O*-levulinoyl- $\alpha$ -L-idopyranosyluronate)-(1 $\rightarrow$ 4)-*O*-2-azido-3-*O*-benzyl-2-deoxy-6-*O*-acetyl- $\beta$ -**

**D-glucopyranoside (14):** Disaccharide **54** (15 mg, 0.017 mmol) was prepared according to the general procedure for synthesis of Fmoc protected disaccharides. Silica gel chromatography of the residue (toluene/EtOAc, 95/5 to 90/10, v/v) afforded **14** (16.9 mg, 90%).  $[\alpha]_D^{25}$  -16.1 ( $c = 1.7$ , CHCl<sub>3</sub>); <sup>1</sup>H NMR (500 MHz, CDCl<sub>3</sub>):  $\delta$  7.74-7.72 (m, 2H, CH Aromatic), 7.55-7.54 (m, 2H, CH Aromatic), 7.39-7.20 (m, 24H, CH Aromatic), 5.10 (bs, 1H, H1<sup>B</sup>), 4.99 (d, 1H,  $J = 3.0$  Hz,  $J = 4.0$  Hz, H4<sup>B</sup>), 4.97 (t, 1H,  $J = 3.0$  Hz, H5<sup>B</sup>), 4.86 (t, 1H,  $J = 2.3$  Hz, H2<sup>B</sup>), 4.72 (d, 1H,  $J = 11.3$  Hz, CHHBn), 4.70-4.67 (m, 2H, CHHBn, CHHBn), 4.60 (d, 1H,  $J = 11.0$  Hz, CHHBn), 4.50-4.46 (m, 2H, H1<sup>A</sup>, H6a<sup>A</sup>), 4.45 (dd, 1H,  $J = 7.3$  Hz,  $J = 10.5$  Hz, CHH Fmoc), 4.35 (dd, 1H,  $J = 7.3$  Hz,  $J = 10.5$  Hz, CHH Fmoc), 4.19 (t, 1H,  $J = 7.3$  Hz, CH Fmoc), 4.12 (dd, 1H,  $J = 5.0$  Hz,  $J = 12.1$  Hz, H6b<sup>A</sup>), 3.88-3.84 (m, 2H, H3<sup>B</sup>, H4<sup>A</sup>), 3.46 (ddd, 1H,  $J = 2.2$  Hz,  $J = 4.8$  Hz,  $J = 11.9$  Hz, H5<sup>A</sup>), 3.42 (s, 3H, CO<sub>2</sub>CH<sub>3</sub>), 3.32 (dd, 1H,  $J = 7.6$  Hz,  $J = 9.9$  Hz, H2<sup>A</sup>), 3.22 (t, 1H,  $J = 9.3$  Hz, H3<sup>A</sup>), 2.81-2.54 (m, 2H, CH<sub>2</sub> Lev), 2.55-2.40 (m, 3H, CH<sub>2</sub> Lev), 2.07 (s, 3H, CH<sub>3</sub> Lev), 2.04 (s, 3H, CH<sub>3</sub> Ac), 1.64-1.42 [m, 1H, CH(CH<sub>3</sub>)<sub>2</sub>], 0.88-0.85 [4s, 12H, C(CH<sub>3</sub>)<sub>2</sub> and CH(CH<sub>3</sub>)<sub>2</sub>], 0.12-0.11 (2s, 6H, Si(CH<sub>3</sub>)<sub>2</sub>). <sup>13</sup>C NMR (75.5 MHz, CDCl<sub>3</sub>):  $\delta$  206.1, 171.7, 170.6, 168.3, 154.3, 143.2, 143.1, 141.3, 141.3, 137.9, 137.3, 128.4, 128.2, 128.0, 127.9, 127.5, 127.4, 127.12, 125.1, 125.0, 124.3, 120.1, 97.5, 97.0, 80.9, 77.4, 77.0, 76.6, 74.8, 74.7, 73.2, 72.9, 72.7, 71.2, 70.1, 68.9, 67.3, 66.8, 62.3, 52.2, 46.6, 37.6, 33.9, 29.5, 27.9, 24.8, 20.8, 20.9, 19.9, 19.8, 18.4, 18.5, 18.3, -2.2, -3.3. HRMS-MALDI: (M + Na<sup>+</sup>) calcd. 1102.4344, found 1102.4363.

**Dimethylhexylsilyl *O*-(methyl 2-*O*-acetyl-3-*O*-benzyl-4-*O*-(9-fluorenylmethoxycarbonyl)- $\beta$ -L-idopyranosyluronate)-(1 $\rightarrow$ 4)-*O*-2-azido-3-*O*-benzyl-2-deoxy-6-*O*-levylinyl- $\beta$ -D-**

**glucopyranoside (15)**: Disaccharide **55** (56.5 mg, 0.065 mmol) was prepared according to the general procedure for synthesis of Fmoc protected disaccharides. Silica gel chromatography of the residue (toluene/EtOAc, 95/5 to 90/10, v/v) afforded **15** (51.4 mg, 73%).  $[\alpha]_D^{25} +13$  ( $c = 1.5$ ,  $\text{CHCl}_3$ );  $^1\text{H NMR}$  (500 MHz,  $\text{CDCl}_3$ ):  $\delta$  7.74-7.73 (m, 2H, *CH* Aromatic), 7.54-7.53 (m, 2H, *CH* Aromatic), 7.28-7.08 (m, 25H, *CH* Aromatic), 5.07 (bs, 1H,  $\text{H1}^{\text{B}}$ ), 4.99 (d, 1H,  $J = 2.6$  Hz,  $\text{H5}^{\text{B}}$ ), 4.97 (t, 1H,  $J = 3.2$  Hz,  $\text{H4}^{\text{B}}$ ), 4.84 (bs, 1H,  $\text{H2}^{\text{B}}$ ), 4.72 (d, 1H,  $J = 11.3$  Hz, *CHHBn*), 4.69 (d, 1H,  $J = 11.3$  Hz, *CHHBn*), 4.66 (d, 1H,  $J = 11.0$  Hz, *CHHBn*), 4.60 (d, 1H,  $J = 11.0$  Hz, *CHHBn*), 4.55 (dd, 1H,  $J = 2.0$  Hz,  $J = 12.0$  Hz,  $\text{H6a}^{\text{A}}$ ), 4.49 (d, 1H,  $J = 7.3$  Hz,  $\text{H1}^{\text{A}}$ ), 4.41 (dd, 1H,  $J = 7.3$  Hz,  $J = 10.4$  Hz, *CHH Fmoc*), 4.32 (dd, 1H,  $J = 7.3$  Hz,  $J = 10.4$  Hz, *CHH Fmoc*), 4.18 (t, 1H,  $J = 7.3$  Hz, *CH Fmoc*), 4.08 (dd, 1H,  $J = 4.9$  Hz,  $J = 12.0$  Hz,  $\text{H6b}^{\text{A}}$ ), 3.87-3.84 (m, 2H,  $\text{H3}^{\text{B}}$ ,  $\text{H4}^{\text{A}}$ ), 3.46-3.43 (m, 4H incl. s at 3.43:  $\text{CO}_2\text{CH}_3$ ,  $\text{H5}^{\text{A}}$ ), 3.43 (dd, 1H,  $J = 7.8$  Hz,  $J = 9.9$  Hz,  $\text{H2}^{\text{A}}$ ), 3.11 (t, 1H,  $J = 9.3$  Hz,  $\text{H3}^{\text{A}}$ ), 2.81-2.42 (m, 1H,  $\text{CH}_2$  Lev), 2.72-2.60 (m, 1H,  $\text{CH}_2$  Lev), 2.54-2.42 (m, 2H,  $\text{CH}_2$  Lev), 2.13 (s, 3H,  $\text{CH}_3$  Lev), 1.94 (s, 3H,  $\text{CH}_3$  Ac), 1.60-1.52 [m, 1H,  $\text{CH}(\text{CH}_3)_2$ ], 0.84-0.81 [4s, 12H,  $\text{C}(\text{CH}_3)_2$  and  $\text{CH}(\text{CH}_3)_2$ ], 0.12-0.11 [2s, 6H,  $\text{Si}(\text{CH}_3)_2$ ].  $^{13}\text{C NMR}$  (75.5 MHz,  $\text{CDCl}_3$ ):  $\delta$  206.6, 172.1, 169.9, 168.3, 154.2, 143.2, 143.0, 141.3, 141.3, 137.9, 137.1, 128.5, 128.2, 128.1, 128.0, 127.9, 127.5, 127.4, 127.1, 127.0, 125.0, 124.9, 120.1, 97.3, 97.0, 80.9, 77.4, 77.0, 76.6, 74.8, 74.1, 73.2, 72.8, 72.7, 71.2, 70.1, 68.9, 67.1, 66.6, 62.4, 52.1, 46.6, 37.9, 33.9, 29.7, 29.6, 28.0, 24.8, 20.8, 20.8, 19.9, 19.8, 18.4, 18.3, -2.2, -3.3. HRMS-MALDI: ( $\text{M} + \text{Na}^+$ ) calcd. 1102.4344, found 1102.4363.

**Dimethylhexylsilyl**

***O*-(methyl-2-*O*-levulinoyl-3-*O*-benzyl-4-*O*-(9-**

**fluorenylmethoxycarbonyl)- $\alpha$ -L-idopyranosyluronate)-(1 $\rightarrow$ 4)-*O*-2-azido-3-*O*-benzyl-2-**

**deoxy-6-*O*-levulinoyl- $\beta$ -D-glucopyranoside (16)**: Compound **56** (20 mg, 0.0218 mmol) was



prepared according to the general procedure for synthesis of Fmoc protected disaccharides. Silica gel chromatography of the residue (toluene/EtOAc, 95/5 to 90/10, v/v) afforded **16** (17 mg, 68%).  $[\alpha]_D^{25} +17$  (c = 1, CHCl<sub>3</sub>); <sup>1</sup>H NMR (500 MHz, CDCl<sub>3</sub>): δ 7.75-7.19 (m, 25H, CH Aromatic), 5.04 (bs, 1H, H5<sup>B</sup>), 4.98 (bs, 2H, H2<sup>B</sup>, H1<sup>B</sup>), 4.86 (bs, 2H, H4<sup>B</sup>), 4.73 (d, 1H, *J* = 11.0 Hz, CHHBn), 4.69 (d, 1H, *J* = 11.5 Hz, CHHBn), 4.66 (d, 1H, *J* = 11.0, CHHBn), 4.58 (d, 1H, *J* = 10.5 Hz, CHHBn), 4.54 (dd, 1H, *J* = 2.0 Hz, *J* = 12.0 Hz, H6a<sup>A</sup>), 4.50 (d, 1H, *J* = 8.0 Hz, H1<sup>A</sup>), 4.45 (dd, 1H, *J* = 7.5 Hz, *J* = 10.5 Hz, CHH Fmoc), 4.37 (dd, 1H, *J* = 7.5 Hz, *J* = 10.5 Hz, CHH Fmoc), 4.20 (t, 1H, *J* = 7.0 Hz, CH Fmoc), 4.11 (dd, 1H, *J* = 4.5 Hz, *J* = 12.0 Hz, H6b<sup>A</sup>), 3.911-3.87 (m, 2H, H3<sup>B</sup>, H4<sup>A</sup>), 3.48-3.45 (m, 1H, H5<sup>A</sup>), 3.43 (s, 3H, CO<sub>2</sub>CH<sub>3</sub>) 3.33 (dd, 1H, *J* = 7.5 Hz, *J* = 10.0 Hz, H2<sup>A</sup>), 3.22 (t, 1H, *J* = 9.5 Hz, H3<sup>A</sup>), 2.86-2.70 (m, 3H, CH<sub>2</sub> Lev, CHH Lev), 2.61-2.48 (m, 5H, 2 x CH<sub>2</sub> Lev, CHH Lev), 2.18 (s, 3H, CH<sub>3</sub> Lev), 2.06 (s, 3H, CH<sub>3</sub> Lev), 1.68-1.60 [m, 1H, CH(CH<sub>3</sub>)<sub>2</sub>], 0.90-0.88 [4s, 12H, C(CH<sub>3</sub>)<sub>2</sub> and CH(CH<sub>3</sub>)<sub>2</sub>], 0.19-0.17 [2s, 6H, Si (CH<sub>3</sub>)<sub>2</sub>]. <sup>13</sup>C NMR (75.5 MHz, CDCl<sub>3</sub>): δ 206.7, 206.3, 172.1, 171.7, 168.3, 154.2, 143.2, 141.3, 137.9, 137.2, 128.4, 128.3, 128.2, 128.0, 127.9, 127.5, 127.4, 127.1, 125.1, 125.0, 120.0, 97.1, 97.0, 80.9, 77.4, 77.0, 76.6, 74.8, 74.0, 73.1, 72.9, 72.7, 71.2, 70.1, 68.9, 67.1, 66.5, 62.5, 52.1, 46.6, 37.9, 37.6, 33.9, 33.7, 31.9, 30.1, 29.7, 29.5, 29.3, 28.1, 27.9, 24.8, 22.7, 19.9, 19.8, 18.4, 18.3, 14.1, 14.1, -2.1, 3.2. HRMS-MALDI: (M + Na<sup>+</sup>) calcd. 1135.4709, found 1135.4715.

***N*-(Benzyl)-benzyloxycarbonyl-5-aminopentyl O-[(methyl-2-*O*-acetyl-3-*O*-benzyl-4-*O*-(9-fluorenylmethoxycarbonyl)-β-*D*-glucopyranosyluronate)-(1→4)-*O*-(2-azido-3-*O*-benzyl-2-deoxy-6-*O*-levulinoyl-α-*D*-glucopyranoside)-(1→4)-*O*-(methyl-2-*O*-acetyl-3-*O*-benzyl-β-*D*-glucopyranosyluronate)]-(1→4)-*O*-(2-azido-3-*O*-benzyl-2-deoxy-6-*O*-levulinoyl-α-*D*-glucopyranoside (70)**: Glycosylation of disaccharide acceptor **19** (93.0 mg, 0.086 mmol) with

disaccharide donor **47** (73.4 mg, 0.072 mmol) according to the general procedure for preparation of tetrasaccharides followed by silica gel chromatography (toluene/EtOAc, 60/40, v/v) provided tetrasaccharide **71** (85 mg, 61%).  $[\alpha]_D^{25} +27.8$  ( $c = 0.93$ ,  $\text{CHCl}_3$ );  $^1\text{H NMR}$  (500 MHz,  $\text{CDCl}_3$ ):  $\delta$  7.75-7.73 (m, 2H, CH Aromatic), 7.56-7.53 (m, 2H, CH Aromatic), 7.41-7.17(m, 34H, CH Aromatics), 5.35 (d, 1H,  $J = 3.6$  Hz,  $\text{H1}^{\text{C}}$ ), 5.21 (d, 1H,  $J = 11.4$  Hz,  $\text{CHHBn}$ ), 5.16 (bd, 2H,  $J = 15.0$  Hz,  $\text{CH}_2$  Cbz), 5.10-5.05 (m, 3H,  $\text{H2}^{\text{B}}$ ,  $\text{H2}^{\text{D}}$ ,  $\text{H4}^{\text{D}}$ ), 4.80-4.77 (m, 2H,  $\text{H1}^{\text{A}}$ ,  $\text{CHHBn}$ ), 4.74 (d, 1H,  $J = 7.9$  Hz,  $\text{H1}^{\text{B}}$ ), 4.73 (d, 1H,  $J = 7.6$  Hz,  $\text{H1}^{\text{D}}$ ), 4.67-4.54 (m, 6H, 3 x  $\text{CH}_2\text{Bn}$ ), 4.47(m, 2H,  $\text{NCH}_2\text{Bn}$ ), 4.41-4.34 (m, 4H,  $\text{CHH Fmoc}$ ,  $\text{H6a}^{\text{A}}$ ,  $\text{H6a}^{\text{C}}$ ,  $\text{H5}^{\text{D}}$ ), 4.27 (dd, 1H,  $J = 7.6$  Hz,  $J = 10.4$  Hz,  $\text{CHH Fmoc}$ ), 4.20-4.12 (m, 5H,  $\text{CH Fmoc}$ ,  $\text{H6b}^{\text{A}}$ ,  $\text{H6b}^{\text{C}}$ ,  $\text{H4}^{\text{B}}$ ,  $\text{H5}^{\text{B}}$ ), 3.98 (t, 1H,  $J = 9.5$  Hz,  $\text{H3}^{\text{B}}$ ), 3.94 (t, 1H,  $J = 9.0$  Hz,  $\text{H3}^{\text{D}}$ ), 3.92-3.83 (m, 3H,  $\text{H4}^{\text{A}}$ ,  $\text{H4}^{\text{C}}$ ,  $\text{H3}^{\text{A}}$ ), 3.72-3.68 (m, 3H,  $\text{H5}^{\text{A}}$ ,  $\text{H3}^{\text{A}}$ ,  $\text{OCHH Linker}$ ), 3.59-3.55 (bm, 2H,  $\text{OCHH Linker}$ ,  $\text{H5}^{\text{C}}$ ), 3.44 (s, 3H,  $\text{CO}_2\text{CH}_3$ ), 3.42 (s, 3H,  $\text{CO}_2\text{CH}_3$ ), 3.27-3.19 (m, 4H incl.  $\text{H2}$ : dd,  $J = 3.6$  Hz,  $J = 10.3$  Hz at 3.25,  $\text{H2}^{\text{A}}$ ,  $\text{CH}_2\text{N Linker}$ ), 2.97-2.91 (m, 2H, 2 x  $\text{CH}_2$  Lev), 2.76-2.56 (m, 4H, 2 x  $\text{CH}_2$  Lev), 2.48-2.37 (m, 2H,  $\text{CH}_2$  Lev), 2.20, 2.19, 2.00, 1.98 (4s, 12H, 2 x  $\text{CH}_3$  Ac, 2 x  $\text{CH}_3$  Lev), 1.58-1.24 (m, 6H, 3 x  $\text{CH}_2$  Linker).  $^{13}\text{C NMR}$  (75.5 MHz,  $\text{CDCl}_3$ ):  $\delta$  206.1, 205.8, 172.3, 171.7, 171.5, 168.2, 168.3, 167.4, 166.5, 166.4, 153.1, 153.0, 142.7, 142.6, 142.4, 141.7, 141.6, 141.4, 140.3 128.7-127.5, 125.4, 125.3, 120.3, 101.4 ( $\text{C1}^{\text{D}}$ ), 101.0 ( $\text{C1}^{\text{B}}$ ), 98.1 ( $\text{C1}^{\text{A}}$ ), 97.5 ( $\text{C1}^{\text{C}}$ ), 79.7, 78.6, 78.4, 78.0, 77.7, 75.7, 75.6, 75.0, 74.7, 74.4, 73.3, 72.7, 72.6, 70.5, 69.3, 68.9, 68.7, 67.4, 63.0, 62.3, 61.8, 52.8, 50.7, 50.6, 38.2, 30.0, 29.2, 28.2, 23.5, 21.0, 20.9. HRMS-MALDI: ( $\text{M} + \text{Na}^+$ ) calcd. 1966.7373, found 1943.7335.

***N*-(Benzyl)-benzyloxycarbonyl-5-aminopentyl O-[(methyl-2-*O*-acetyl-3-*O*-benzyl-4-*O*-(9-fluorenylmethoxycarbonyl)- $\beta$ -D-glucopyranosyluronate)-(1 $\rightarrow$ 4)-(2-azido-3-*O*-benzyl-2-deoxy-6-*O*-levulinoyl- $\alpha$ -D-glucopyranoside)-(1 $\rightarrow$ 4)-(methyl-2-*O*-acetyl-3-*O*-benzyl- $\alpha$ -L-**

**idopyranosyluronate)]-(1→4)-O-2-azido-3-O-benzyl-2-deoxy-6-O-levulinoyl- $\alpha$ -D-glucopyranoside (71):** Glycosylation of disaccharide acceptor **23** (112 mg, 0.103 mmol) with disaccharide donor **47** (127 mg, 0.124 mmol) according to the general procedure for preparation of tetrasaccharides followed by silica gel chromatography (hexane/EtOAc, 60/40, v/v) provided tetrasaccharide **71** (125 mg, 62%).  $[\alpha]_D^{25} +26$  ( $c = 1$ ,  $\text{CHCl}_3$ );  $^1\text{H NMR}$  (500 MHz,  $\text{CDCl}_3$ ):  $\delta$  7.73-7.71(m, 2H, CH Aromatic), 7.55-7.50 (m, 2H, CH Aromatic), 7.42-7.14 (m, 34H, CH Aromatics), 5.23-5.18 (m, 2H, H1<sup>B</sup>, CHHBn), 5.18-5.13 (m, 2H, CH<sub>2</sub> Cbz), 5.11-5.04 (m, 2H, H2<sup>D</sup>, H4<sup>D</sup>), 4.93-4.89 (m, 2H, H1<sup>C</sup>, H2<sup>B</sup>), 4.83-4.77 (m, 2H, CH<sub>2</sub>Bn, H1<sup>A</sup>), 4.73 (d, 1H,  $J = 8.1$  Hz, H1<sup>D</sup>), 4.55-4.70 (m, 6H, 2 x CH<sub>2</sub>Bn, CHHBn, H5<sup>B</sup> at 4.61), 4.51- 4.46 (m, 2H, NCH<sub>2</sub>Bn), 4.43-4.37 (m, 5H, CH<sub>2</sub> Fmoc, H6a<sup>A</sup>, H6a<sup>C</sup>, H5<sup>D</sup> at 4.28), 4.21-4.14 (m, 3H, 2 x H6, CH Fmoc), 3.99-3.94 (m, 2H, H4<sup>B</sup>, H3<sup>D</sup>), 3.92-3.86 (m, 2H, H4<sup>C</sup>, H3<sup>B</sup>), 3.83-3.75 (m, 3H, H3<sup>A</sup>, H5<sup>A</sup>, H5<sup>C</sup>), 3.67-3.57 (m, 2H, incl. OCHH Link, H3<sup>C</sup>: dd at 3.65  $J = 8.7$  Hz,  $J = 10.5$  Hz), 3.52 and 3.43 (2s, 6H, 2 x CO<sub>2</sub>CH<sub>3</sub>), 3.43-3.17 (m, 5H, incl. H2<sup>A</sup>, H2<sup>C</sup>: dd at 3.23  $J = 3.5$  Hz,  $J = 10.5$  Hz, OCHH Linker, CH<sub>2</sub>N Linker), 2.30-3.00 (m, 8H, 4 x CH<sub>2</sub> Lev), 2.20-1.96 (4s, 12H, 2 x CH<sub>3</sub> Ac, 2 x CH<sub>3</sub> Lev), 1.72-1.40 (m, 4H, 2 x CH<sub>2</sub> Linker), 1.40-1.20 (m, 2H, CH<sub>2</sub> Linker).  $^{13}\text{C NMR}$  (75.5 MHz,  $\text{CDCl}_3$ ):  $\delta$  206.8, 206.3, 172.5, 172.3, 170.0, 169.6, 169.0, 167.4, 154.0, 143.3, 143.0, 141.3, 141.2, 138.1, 138.0, 137.9, 137.7, 137.4, 128.5-127.1, 125.1, 125.0, 120.0, 100.5 (C1<sup>B</sup>), 98.0 (C1<sup>C</sup>), 97.5 (C1<sup>A</sup>), 97.4 (C1<sup>D</sup>), 79.3, 78.2, 77.6, 77.2, 75.8, 75.4, 75.3, 74.7, 74.3, 74.2, 73.5, 72.9, 72.4, 72.8, 70.3, 69.7, 69.1, 69.0, 68.2, 67.0. HRMS-MALDI: (M + Na<sup>+</sup>) calcd. 1966.7373, found 1966.7442.

**N-(Benzyl)-benzyloxycarbonyl-5-aminopentyl O-[(methyl-2-O-acetyl-3-O-benzyl-4-O-(9-fluorenylmethoxycarbonyl)- $\alpha$ -L-idopyranosyluronate)-(1→4)-O-(2-azido-3-O-benzyl-2-**

**deoxy-6-*O*-levulinoyl- $\alpha$ -D-glucopyranoside)-(1 $\rightarrow$ 4)-*O*-(methyl-2-*O*-acetyl-3-*O*-benzyl- $\beta$ -D-glucopyranosyluronate)]-(1 $\rightarrow$ 4)-*O*-2-azido-3-*O*-benzyl-2-deoxy-6-*O*-levulinoyl- $\alpha$ -D-glucopyranoside (72):** Glycosylation of disaccharide acceptor **19** (90 mg, 0.083 mmol) with donor **59** (107 mg, 0.100 mmol) was performed according to the general procedure for preparation of tetrasaccharides followed by chromatography (toluene/EtOAc, 75/25, v/v) providing tetrasaccharide **72** (104 mg, 64%).  $[\alpha]_D^{25} +19$  ( $c = 1$ , CHCl<sub>3</sub>); <sup>1</sup>H NMR (500 MHz, CDCl<sub>3</sub>):  $\delta$  7.73-7.70 (m, 2H, CH Aromatics), 7.54-7.50 (m, 2H, CH Aromatics), 7.42-7.14 (m, 36 H, CH Aromatics), 5.36 (d, 1H,  $J = 3.6$  Hz, H1<sup>C</sup>), 5.19-5.13 (m, 2H, CH<sub>2</sub> Cbz), 5.13-5.08 (m, 3H, H1<sup>D</sup>, H2<sup>B</sup>, CHHBn), 4.94 (t, 1H,  $J = 4.0$  Hz, H4<sup>D</sup>), 4.86-4.82 (m, 3H, H2<sup>D</sup>, H5<sup>D</sup>, CHHBn), 4.82-4.76 (m, 1H, H1<sup>A</sup>), 4.75-4.58 (m, 7H, 2 CHHBn, 4 x CHHBn, and H1<sup>B</sup> at 4.71), 4.51-4.45 (m, 2H, CH<sub>2</sub>NBn), 4.45-4.38 (m, 2H, H6a<sup>C</sup>, CHH Fmoc), 4.38-4.32 (m, 2H, H6a<sup>A</sup>, CHH Fmoc), 4.23-4.16 (m, 4H, CH<sub>2</sub>CH Fmoc, H6b<sup>A</sup>, H4<sup>B</sup>, H5<sup>B</sup>), 4.10 (dd, 1H,  $J = 11.2$  Hz,  $J = 3.3$  Hz, H6b<sup>C</sup>), 3.95-3.91 (m, 1H, H3<sup>B</sup>), 3.90-3.82 (m, 4H, H3<sup>A</sup>, H3<sup>B</sup>, H3<sup>D</sup>, H4<sup>C</sup>), 3.76-3.70 (m, 1H, H5<sup>A</sup>), 3.67 (dd, 1H,  $J = 9.1$  Hz,  $J = 9.0$  Hz, H3<sup>C</sup>), 3.64-3.56 (m, 2H, H5<sup>C</sup>, OCHH Linker), 3.48 (s, 3H, CO<sub>2</sub>CH<sub>3</sub>), 3.42-3.16 (m, 8H, incl. CO<sub>2</sub>CH<sub>3</sub>: s at 3.42, H2<sup>C</sup>: dd  $J = 3.8$  Hz,  $J = 10.3$  Hz at 3.31, OCHH Linker, CH<sub>2</sub>N Linker, H2<sup>A</sup>), 2.80-2.45 (m, 8H, 4 x CH<sub>2</sub> Lev), 2.20-1.95 (4s, 12H, 2 x CH<sub>3</sub> Ac, 2 x CH<sub>3</sub> Lev), 1.74-1.44 (m, 6H, 3 x CH<sub>2</sub> Linker). <sup>13</sup>C NMR (75.5 MHz, CDCl<sub>3</sub>):  $\delta$  206.7, 206.6, 171.5, 172.1, 171.4, 170.8, 169.8, 169.2, 168.4, 168.1, 154.1, 143.1, 142.9, 141.2, 138.3, 137.8, 137.6, 137.5, 137.1, 136.8, 128.5-127.0, 125.0, 124.9, 120.0, 101.0 (C1<sup>B</sup>), 97.7 (C1<sup>D</sup>), 97.4 (C1<sup>B</sup>), 97.2 (C1<sup>A</sup>), 81.9, 78.3, 78.1, 77.7, 77.2, 75.5, 75.3, 74.8, 74.5, 74.4, 74.3, 73.0, 72.0, 71.6, 70.8, 70.1, 69.5, 68.6, 68.3, 68.1, 67.3, 67.1, 63.4, 62.8, 62.0, 61.4, 55.7, 52.4, 52.1, 50.5, 50.2, 47.0, 46.5, 46.0, 37.9, 37.5, 34.8, 29.7, 29.6, 25.4, 25.2, 24.8, 24.6, 23.2. HRMS-MALDI: (M + Na<sup>+</sup>) calcd. 1966.7373, found 1966.7372.

***N*-(Benzyl)-benzyloxycarbonyl-5-aminopentyl *O*-[(methyl-2-*O*-acetyl-3-*O*-benzyl-4-*O*-(9-fluorenylmethoxycarbonyl)- $\alpha$ -L-idopyranosyluronate)-(1 $\rightarrow$ 4)-*O*-(2-azido-3-*O*-benzyl-2-deoxy-6-*O*-levulinoyl- $\alpha$ -D-glucopyranoside)-(1 $\rightarrow$ 4)-*O*-(methyl-2-*O*-acetyl-3-*O*-benzyl- $\alpha$ -L-idopyranosyluronate)-(1 $\rightarrow$ 4)-*O*-2-azido-3-*O*-benzyl-2-deoxy-6-*O*-levulinoyl- $\alpha$ -D-glucopyranoside (73)**: Glycosylation of disaccharide acceptor **23** (123.4mg, 0.1140 mmol) with donor **59** (97.4 mg, 0.0950 mmol) was performed according to the general procedure for preparation of tetrasaccharides followed by silica chromatography (hexanes/EtOAc, 60/40 to 50/50, v/v) providing tetrasaccharide **73** (114.6 mg, 62%).  $[\alpha]_D^{23} +30.4$  ( $c = 1$ ,  $\text{CHCl}_3$ );  $^1\text{H NMR}$  (500 MHz,  $\text{CDCl}_3$ ):  $\delta$  7.68-7.65 (m, 2H, CH Aromatic), 7.48-7.42 (m, 2H, CH Aromatic), 7.32-7.15 (m, 34H, CH Aromatic), 5.17-5.10 (m, 3H incl. H1<sup>B</sup>: d,  $J = 2.9$  Hz at 5.16,  $\text{CH}_2$  Cbz), 5.1 (d, 1H,  $J = 2.7$  Hz, H1<sup>D</sup>), 4.95 (t, 1H,  $J = 3.9$  Hz, H4<sup>D</sup>), 4.91 (t, 1H,  $J = 3.8$  Hz, H2<sup>B</sup>), 4.88 (d, 1H,  $J = 3.4$  Hz, H1<sup>C</sup>), 4.86 (d, 1H,  $J = 3.4$  Hz, H5<sup>D</sup>), 4.83 (t, 1H,  $J = 3.4$  Hz, H2<sup>D</sup>), 4.80-4.57 (m, 10H incl. H1<sup>A</sup>: 4.79, H5<sup>B</sup>: d,  $J = 3.2$  Hz at 4.75, 4 x  $\text{CH}_2\text{Bn}$ ), 4.48-4.40 (m, 5H,  $\text{NCH}_2\text{Bn}$ , H6a<sup>A</sup>, H6a<sup>C</sup>,  $\text{CHH Fmoc}$ ), 4.35 (dd, 1H,  $J = 7.6$  Hz,  $J = 10.5$  Hz,  $\text{CHH Fmoc}$ ), 4.2-7.17 (m, 2H, H6b<sup>A</sup>,  $\text{CH Fmoc}$ ), 4.11 (dd, 1H,  $J = 2.44$  Hz,  $J = 12.7$  Hz, H6b<sup>C</sup>), 3.96 (t, 1H,  $J = 3.9$  Hz, H4<sup>B</sup>), 3.92-3.88 (m, 2H, H4<sup>C</sup>, H3<sup>B</sup>), 3.86-3.74 (m, 5H, H3<sup>D</sup>, H4<sup>A</sup>, H5<sup>A</sup>, H3<sup>A</sup>, H5<sup>C</sup>), 3.65-3.6 (m, 2H, incl.  $\text{OCHH Linker}$ , H3<sup>C</sup>: t,  $J = 9.7$  Hz at 3.62), 3.45 and 3.44 (2s, 6H, 2 x  $\text{CO}_2\text{CH}_3$ ), 3.33-3.17 (bm, 1H,  $\text{OCHH Linker}$ ), 3.29-3.27 (m, 2H incl. H2<sup>A</sup>: dd,  $J = 2.4$  Hz,  $J = 12.4$  Hz at 3.28), 3.20-3.10 (bm, 2H,  $\text{CH}_2\text{N Linker}$ ), 2.83-2.69 (m, 4H, 2 x  $\text{CH}_2$  Lev), 2.66-2.52 (m, 4H, 2 x  $\text{CH}_2$  Lev), 2.15-1.98 (4s, 12H, 2 x  $\text{CH}_3$  Ac, 2 x  $\text{CH}_3$  Lev), 1.34-1.23 (m, 6H, 3 x  $\text{CH}_2$  Linker).  $^{13}\text{C NMR}$  (75.5 MHz,  $\text{CDCl}_3$ ):  $\delta$  206.9, 206.7, 172.6, 172.4, 170.3, 170.0, 169.5, 168.7, 143.4, 143.2, 141.5, 138.1, 137.7, 137.4, 137.3, 128.8-127.4, 125.2, 120.4, 98.2 (C1<sup>B</sup>), 97.8 (C1<sup>D</sup>), 97.5 (C1<sup>A</sup>), 97.3

(C1<sup>C</sup>), 78.5, 78.3, 77.7, 77.5, 77.2, 76.8, 75.6, 74.9, 74.8, 74.5, 73.7, 73.6, 73.4, 72.7, 71.8, 70.4, 69.9, 69.3, 69.1, 68.6, 68.4, 67.5, 67.4, 63.5, 62.6, 62.1, 52.4, 52.1 46.8, 38.1, 38.0, 30.0, 29.9, 29.3, 28.3, 28.2, 23.5, 21.1, 21.0. HRMS-MALDI: (M + Na<sup>+</sup>) calcd. 1966.7373, found 1966.7362.

***N*-(Benzyl)-benzyloxycarbonyl-5-aminopentyl O-[(methyl-2-*O*-acetyl-3-*O*-benzyl-4-*O*-(9-fluorenylmethoxycarbonyl)- $\alpha$ -L-idopyranosyluronate)-(1 $\rightarrow$ 4)-*O*-(2-azido-3-*O*-benzyl-2-deoxy-6-*O*-levulinoyl- $\alpha$ -D-glucopyranoside)-(1 $\rightarrow$ 4)-*O*-(methyl-3-*O*-benzyl-2-*O*-levulinoyl- $\alpha$ -L-idopyranosyluronate)]-(1 $\rightarrow$ 4)-*O*-2-azido-3-*O*-benzyl-2-deoxy-6-*O*-levulinoyl- $\alpha$ -D-glucopyranoside) (74):** Glycosylation of disaccharide acceptor **19** (107 mg, 0.099 mmol) with donor **59** (128 mg, 0.119 mmol) was performed according to the general procedure for preparation of tetrasaccharides followed by silica gel chromatography (hexanes/EtOAc, 60/40 to 50/50, v/v) providing tetrasaccharide **72** (80 mg, 51%).  $[\alpha]_D^{25} +30$  ( $c = 1$ , CHCl<sub>3</sub>); <sup>1</sup>HNMR (500 MHz, CDCl<sub>3</sub>):  $\delta$  7.78-7.73 (m, 2H, CH Aromatics), 7.59-7.53 (m, 2H, CH Aromatics), 7.35-7.12 (m, 34H, CH Aromatic), 5.19-5.13 (m, 3H incl. H1<sup>B</sup>: d,  $J = 3.4$  Hz at 5.18, CH<sub>2</sub> Cbz), 5.12 (d, 1H,  $J = 3.0$  Hz, H1<sup>D</sup>), 5.02 (d, 1H,  $J = 3.5$  Hz, H1<sup>C</sup>), 4.96-4.91 (m, 2H, H2<sup>B</sup>, H4<sup>D</sup>), 4.86 (d, 1H,  $J = 3.6$  Hz, H5<sup>D</sup>), 4.82 (t, 1H,  $J = 3.6$  Hz, H2<sup>D</sup>), 4.81-4.59 (m, 10H, incl. H1<sup>A</sup> at 4.80, H5<sup>B</sup> at 4.70, 4 x CH<sub>2</sub>Bn), 4.50-4.46 (m, 2H, CH<sub>2</sub>NBn), 4.46-4.38 (m, 3H, H6a<sup>A</sup>, H6a<sup>C</sup>, CHH Fmoc), 4.35 (dd, 1H,  $J = 7.5$  Hz,  $J = 8.3$  Hz, CHH Fmoc), 4.13 (bd,  $J = 12.5$  Hz, H6b<sup>A</sup>), 4.18 (t, 1H,  $J = 7.3$  Hz, CH Fmoc), 4.12 (dd, 1H,  $J = 3.1$  Hz,  $J = 12.5$  Hz, H6b<sup>C</sup>), 3.98 (t, 1H,  $J = 4.4$  Hz, H4<sup>B</sup>), 3.94 (t, 1H,  $J = 4.4$  Hz, H3<sup>B</sup>), 3.92-3.83 (m, 5H, H3<sup>A</sup>, H3<sup>D</sup>, H4<sup>A</sup>, H4<sup>C</sup>, H5<sup>A</sup>), 3.76-3.20 (m, 1H, H5<sup>C</sup>), 3.67-3.55 (m, 2H, incl. H3<sup>C</sup>: t at 3.61  $J = 9.0$  Hz, OCHH Linker), 3.56 (s, 3H, CO<sub>2</sub>CH<sub>3</sub>), 3.45 (s, 3H, CO<sub>2</sub>CH<sub>3</sub>), 3.43-3.17 (m, 5H, incl. H2<sup>C</sup>: dd at 3.27, OCHH Linker, H2<sup>A</sup>, CH<sub>2</sub>N Linker), 2.76-

2.42 (m, 8H, 4 x CH<sub>2</sub> Lev), 2.10, 2.09, 2.05, 2.94 (4s, 12H, 1 x CH<sub>3</sub> Ac, 3 x CH<sub>3</sub> Lev), 1.72-1.20 (m, 6H, 3 x CH<sub>2</sub> Linker). <sup>13</sup>C NMR (75.4 MHz, CDCl<sub>3</sub>): δ 206.5, 206.4, 206.1, 172.3, 172.1, 169.7, 169.3, 168.5, 154.1, 143.1, 143.0, 141.3, 141.2, 137.8, 137.5, 137.4, 137.1, 136.8, 128.5, 128.4, 128.2, 128.1, 127.9, 127.8, 127.6, 127.5, 127.4, 127.3, 127.1, 124.9, 120.0, 97.8 (C1<sup>B</sup>), 97.5 (C1<sup>D</sup>), 97.3 (C1<sup>C</sup>), 96.6 (C1<sup>A</sup>), 78.2, 78.0, 77.0, 75.4, 74.6, 74.3, 73.5, 73.3, 73.2, 72.9, 72.4, 71.8, 71.6, 71.4, 70.5, 70.2, 69.5, 69.3, 69.0, 68.9, 68.8, 68.3, 68.1, 67.3, 67.1, 64.3, 63.2, 62.4, 61.8, 52.1, 51.8, 50.5, 50.2, 47.0, 46.5, 46.2, 37.8, 37.7, 29.8, 29.7, 29.6, 28.9, 28.0, 27.9, 27.6, 23.2, 20.8. HRMS-MALDI: (M + Na<sup>+</sup>) calcd. 2022.7743, found 2022.7783.

***N*-(Benzyl)-benzyloxycarbonyl-5-aminopentyl O-[(methyl-2-*O*-acetyl-3-*O*-benzyl-4-*O*-(9-fluorenylmethoxycarbonyl)-β-*D*-glucopyranosyluronate))-(1→4)-*O*-(2-azido-3-*O*-benzyl-2-deoxy-6-*O*-levulinoyl-α-*D*-glucopyranoside)-(1→4)-*O*-(methyl 2-*O*-levulinoyl-3-*O*-benzyl-α-*L*-idopyranosyluronate)]-(1→4)-*O*-2-azido-3-*O*-benzyl-2-deoxy-6-*O*-levulinoyl-α-*D*-glucopyranoside) (75):** Glycosylation of disaccharide acceptor **24** (274mg, 0.254 mmol) with donor **47** (329 mg, 0.305 mmol) was performed according to the general procedure for preparation of tetrasaccharides followed by silica gel chromatography (Hexanes/EtOAc 60/40 to 50/50) providing tetrasaccharide **75** (282 mg, 59%). [α]<sub>D</sub><sup>25</sup> +19 (*c* = 1, CHCl<sub>3</sub>); <sup>1</sup>H NMR (500 MHz, CDCl<sub>3</sub>): δ 7.75-7.71 (m, 2H CH Aromatics) 7.58-7.52 (m, 2H, CH Aromatics), 7.42-7.16 (m, 34H, CH Aromatics), 5.23 (d, 1H, *J* = 4.4 Hz, H1<sup>B</sup>), 5.20 (d, 1H, *J* = 11.1 Hz, CHHBn), 5.18-5.12 (m, 2H CH<sub>2</sub> Cbz), 5.10-5.04 (m, 2H, H2<sup>D</sup>, H4<sup>D</sup>), 5.02 (d, 1H, *J* = 3.5 Hz, H1<sup>C</sup>), 4.92 (t, 1H, *J* = 3.0 Hz, H2<sup>B</sup>), 4.82-4.77 (m, 2H, H1<sup>A</sup>, CHHBn), 4.74-4.55 (m, 9H, incl. H5<sup>B</sup> at 4.57, 4 x CH<sub>2</sub>Bn), 4.50-4.45 (m, 2H, CH<sub>2</sub>NBn), 4.43-4.14 (m, 8H, incl. H5<sup>D</sup> at 4.31, H6a<sup>A</sup>, H6b<sup>A</sup>, H6a<sup>C</sup>, H6b<sup>C</sup>, CH<sub>2</sub> Fmoc, CH Fmoc), 3.99-3.80 (m, 8H, H3<sup>A</sup>, H3<sup>B</sup>, H3<sup>D</sup>, H4<sup>A</sup>, H4<sup>B</sup>, H4<sup>C</sup>, H5<sup>A</sup>, H5<sup>C</sup>),

3.67-3.57 (m, 2H, incl. H3<sup>C</sup>: dd at 3.64  $J = 8.5$  Hz,  $J = 10.2$  Hz, OCHH Linker), 3.53 (s, 3H, CO<sub>2</sub>CH<sub>3</sub>), 3.45-3.18 (m, 8H incl. CO<sub>2</sub>CH<sub>3</sub>: s at 3.43, H2<sup>C</sup>: dd at 3.24  $J = 3.5$  Hz,  $J = 10.4$  Hz, H2<sup>A</sup>, OCHH Linker, CH<sub>2</sub>N Linker), 12.80-2.40 (m, 8H, 4 x CH<sub>2</sub> Lev), 2.20-1.95 (4s, 12H, 1 x CH<sub>3</sub> Ac, 3 x CH<sub>3</sub> Lev), 1.64-1.24 (m, 6H, 3 x CH<sub>2</sub> Linker). <sup>13</sup>C NMR (75.5 MHz, CDCl<sub>3</sub>): δ 206.8, 206.4, 206.1, 172.5, 172.4, 172.0, 169.6, 169.0, 167.4, 156.6, 156.1, 154.0, 143.3, 143.0, 141.2, 138.2, 138.0, 137.9, 137.7, 137.5, 136.8, 128.5, 128.4, 128.3, 128.2, 128.1, 128.0, 127.8, 127.7, 127.5, 127.4, 127.2, 127.1, 125.1, 125.0, 124.0, 122.9, 120.0, 100.5 (C1<sup>B</sup>), 97.9 (C1<sup>C</sup>), 97.4 (C1<sup>A</sup>), 97.1, 9 (C1<sup>D</sup>), 79.3, 78.1, 77.6, 75.9, 75.3, 74.8, 74.3, 73.6, 72.6, 72.4, 72.3, 70.3, 70.0, 69.6, 69.0, 68.9, 68.0, 67.1, 63.1, 62.5, 62.3, 61.7, 52.5, 52.1, 50.5, 50.2, 47.0, 46.5, 46.1, 38.0, 37.8, 37.6, 29.7, 29.6, 28.9, 27.8, 27.6, 23.2, 20.6. HRMS-MALDI: (M + Na<sup>+</sup>) calcd. 2022.7743, found 2022.7982.

***N*-(Benzyl)-benzyloxycarbonyl-5-aminopentyl O-[(methyl-2-*O*-acetyl-3-*O*-benzyl-4-*O*-(9-fluorenylmethoxycarbonyl)-β-*D*-glucopyranosyluronate)-(1→4)-*O*-(2-azido-3-*O*-benzyl-2-deoxy-6-*O*-levulinoyl-α-*D*-glucopyranoside)-(1→4)-*O*-(methyl-2-*O*-acetyl-3-*O*-benzyl-α-*L*-idopyranosyluronate)-(1→4)-*O*-(2-azido-3-*O*-benzy-2-deoxy-6-*O*-levulinoyl-α-*D*-glucopyranoside)-(1→4)-*O*-(methyl-2-*O*-acetyl-3-*O*-benzyl-β-*D*-glucopyranosyluronate)]-(1→4)-*O*-2-azido-3-*O*-benzyl-2-deoxy-6-*O*-levulinoyl-α-*D*-glucopyranoside (63):**

Trichloroacetimidate donor **59** (221.8 mg, 0.2052 mmol) was coupled with the acceptor **19** (174.9 mg, 0.1710 mmol) in the presence of TMSOTf (0.0257 mmol, 4.63 mL) according to the general procedure to give tetrasaccharide **61** (289 mg, 64%). Tetrasaccharide **61** was subjected to Fmoc cleavage according to the general procedure to obtain acceptor **62** (209.9 mg, 82%). Acceptor **62** (209.9 mg, 0.1219 mmol) was coupled with the donor **47** (171 mg, 0.1585 mmol)



according to the general procedure to obtain hexasaccharide **63** (209.3 mg, 65%).  $[\alpha]_D^{25}$  +167 ( $c = 0.22$ ,  $\text{CHCl}_3$ );  $^1\text{H NMR}$  (500 MHz,  $\text{CDCl}_3$ ):  $\delta$  7.74-7.71 (m, 2H, CH Aromatics), 7.56-7.52 (m, 2H, CH Aromatics), 7.40-7.17 (m, 40H, CH Aromatics), 5.34 (d, 1H,  $J = 3.7$  Hz,  $\text{H1}^{\text{C}}$ ), 5.25 (d, 1H,  $J = 4.9$  Hz,  $\text{H1}^{\text{D}}$ ), 5.20-5.039 (m, 7H,  $\text{CH}_2\text{Bn}$ ,  $\text{CH}_2$  Cbz,  $\text{H2}^{\text{B}}$ ,  $\text{H2}^{\text{F}}$ ,  $\text{H4}^{\text{F}}$ ), 4.97 (d, 1H,  $J = 3.4$  Hz,  $\text{H1}^{\text{E}}$ ), 4.87 (t, 1H,  $J = 5.6$  Hz,  $\text{H2}^{\text{D}}$ ), 4.83-4.77 (m, 3H incl.  $\text{CH}_2\text{Bn}$ ,  $\text{H1}^{\text{A}}$  at 4.80), 4.73-4.7 (m, 3H incl.  $\text{H1}^{\text{F}}$  at 4.73,  $\text{H1}^{\text{B}}$  at 4.72,  $\text{CH}_2\text{Bn}$ ), 4.68-4.55 (m, 7H,  $\text{CH}_2\text{Bn}$ ), 4.47-4.45 (m, 4H incl.  $\text{NCH}_2\text{Bn}$ ,  $\text{H5}^{\text{B}}$  at 4.56,  $\text{CHH Fmoc}$ ), 4.41-4.25 (m, 5H,  $\text{H6a}^{\text{A}}$ ,  $\text{H6a}^{\text{E}}$ ,  $\text{H6a}^{\text{C}}$ ,  $\text{H5}^{\text{F}}$  at 4.28,  $\text{CHH Fmoc}$ ), 4.19-4.11 (m, 6H,  $\text{H6b}^{\text{E}}$ ,  $\text{H6b}^{\text{A}}$ ,  $\text{H6b}^{\text{C}}$ ,  $\text{H5}^{\text{B}}$ ,  $\text{H4}^{\text{B}}$ ), 3.98-3.92 (m, 3H,  $\text{H3}^{\text{F}}$ ,  $\text{H3}^{\text{B}}$ ,  $\text{H4}^{\text{D}}$ ), 3.91-3.80 (m, 5H,  $\text{H3}^{\text{D}}$ ,  $\text{H4}^{\text{E}}$ ,  $\text{H4}^{\text{A}}$ ,  $\text{H3}^{\text{A}}$ ,  $\text{H5}^{\text{E}}$ ), 3.79 (t, 1H,  $J = 9.5$  Hz,  $\text{H4}^{\text{C}}$ ), 3.73-3.70 (bm, 1H,  $\text{H5}^{\text{A}}$ ), 3.68-3.60 (m, 2H incl.  $\text{H3}^{\text{C}}$ : t,  $J = 9.52$  Hz,  $J = 10.3$  Hz at 3.7,  $\text{H3}^{\text{E}}$ : t,  $J = 8.79$  Hz at 3.64), 3.58-3.51 (m, 5H incl.  $\text{CO}_2\text{CH}_3^{\text{D}}$ : s at 3.56,  $\text{H5}^{\text{C}}$  at 3.54,  $\text{OCHH Linker}$ ), 3.43 (s, 3H,  $\text{CO}_2\text{CH}_3^{\text{F}}$ ), 3.39 (s, 3H,  $\text{CO}_2\text{CH}_3^{\text{B}}$ ), 3.28-3.19 (m, 6H,  $\text{H2}^{\text{C}}$ : dd,  $J = 3.6$  Hz,  $J = 10.3$  Hz at 3.28,  $\text{H2}^{\text{E}}$ ,  $\text{H2}^{\text{A}}$ ,  $\text{OCHH Linker}$ ,  $\text{CH}_2\text{N Linker}$ ), 2.75-2.54 (m, 6H, 3 x  $\text{CH}_2$  Lev), 2.49-2.39 (m, 6H, 3 x  $\text{CH}_2$  Lev), 2.19-1.94 (6s, 36H, 3 x  $\text{CH}_3$  Lev, 3x  $\text{CH}_3$  Ac), 1.65-1.23 (m, 6H, 3 x  $\text{CH}_2\text{Linker}$ ).  $^{13}\text{C NMR}$  (150.8 MHz,  $\text{CDCl}_3$ ):  $\delta$  206.8, 206.7, 206.5, 172.6, 172.5, 172.4, 169.9, 169.8, 169.3, 169.0, 168.2, 167.44, 154.0, 143.3, 143.0, 141.3, 141.2, 138.4, 138.1, 137.8, 137.7, 137.6, 137.4, 128.5-127.1, 125.1, 125.0, 120.0, 101.1, 100.5 ( $\text{C1}^{\text{F}}$ ), 98.0 ( $\text{C1}^{\text{D}}$ ), 97.8 ( $\text{C1}^{\text{E}}$ ), 97.7, 97.2 ( $\text{C1}^{\text{C}}$ ), 82.0, 79.3, 78.4, 78.0, 77.7, 77.6, 77.4, 75.7, 75.5, 75.4, 75.3, 75.0, 74.5, 74.4, 74.3, 74.2, 73.3, 73.1, 72.4, 72.3, 70.5, 70.3, 70.2, 69.5, 69.2, 68.6, 67.2, 63.1, 62.8, 62.5, 62.1, 61.7, 61.6, 52.6, 52.4, 52.2, 50.6, 50.3, 47.1, 46.6, 46.2, 38.1, 38.0, 37.9, 37.8, 31.9, 29.8, 29.7, 29.6, 29.4, 28.9, 27.9, 27.8, 27.7, 27.4, 23.2, 22.7, 20.8, 20.7, 20.6. HRMS-MALDI: ( $\text{M} + \text{Na}^+$ ) calcd. 2663.9856, found 2663.9900.

**Hexasaccharide Deprotection:** Synthesis of Hexasaccharide (**69**):

Cleavage of Lev esters: Hexasaccharide **63** (73.5 mg, 0.028 mmol) was de-levulinoylated according to the general procedure for cleavage of levulinoyl ester to give **64** as a colorless oil (59.2 mg, 90%). <sup>1</sup>H NMR (500 MHz, CD<sub>3</sub>OCD<sub>3</sub>): δ 7.72-7.70 (m, 2H, CH Aromatic), 7.57-7.55 (m, 2H, CH Aromatics), (m, 40H, CH Aromatics), 5.47 (d, 1H, J = 3.7 Hz, H1<sup>C</sup>), 5.38 (d, 1H, J = 4.0 Hz, H1<sup>D</sup>), 5.22-5.12 (m, 4H, CH<sub>2</sub> Cbz, 2 x CHHBn), 5.09-5.06 (m, 3H incl. H1<sup>E</sup> at 5.02, H2<sup>B</sup>, H2<sup>F</sup>), 5.04-4.91 (m, 5H, H2<sup>D</sup>, H4<sup>F</sup>, H1<sup>F</sup>, H1<sup>B</sup>, CHHBn), 4.87-4.75 (m, 6H incl. 4 x CH<sub>2</sub>Bn, H1<sup>A</sup> at 4.80), 4.64-4.49 (m, 7H, 5 x CH<sub>2</sub>Bn, CH<sub>2</sub> Fmoc, NCH<sub>2</sub>Bn), 4.30 (t, 1H, J = 6.6 Hz, CH Fmoc), 4.21-4.12 (m, 3H, H5<sup>F</sup>, H4<sup>B</sup>, H5<sup>B</sup>), 4.07 (t, 1H, J = 5.2 Hz, H3<sup>D</sup>), 4.03-3.92 (m, 5H, H3<sup>F</sup>, H3<sup>B</sup>, H4<sup>C</sup>, H4<sup>E</sup>, H4<sup>A</sup>), 3.88-3.71 (m, 10H, H3<sup>A</sup>, H3<sup>E</sup>, H3<sup>C</sup>, H6a<sup>A</sup>, H6a<sup>E</sup>, H6a<sup>C</sup>, H6b<sup>E</sup>, H6b<sup>A</sup>, H6b<sup>C</sup>, H5<sup>E</sup>), 3.62 (m, 5H incl. s at 3.62: CO<sub>2</sub>CH<sub>3</sub>, OCHH Linker, H5<sup>A</sup>), 3.53, 3.51 (2s, 6H, CO<sub>2</sub>CH<sub>3</sub><sup>B or D</sup>, CO<sub>2</sub>CH<sub>3</sub><sup>B or D</sup>), 3.46-3.43 (m, 2H, H2<sup>C</sup>, H5<sup>C</sup>), 3.43-3.38 (bm, 1H, OCHH Linker), 3.45 (dd, 1H, J = 3.7 Hz, J = 10.4 Hz, H2<sup>C</sup>), 3.30 (dd, 1H, J = 3.3 Hz, J = 10.4 Hz, H2<sup>F</sup>), 3.25-3.23 (m, 3H incl. H2<sup>A</sup>: dd, J = 3.0 Hz, J = 10.2 Hz at 3.25, CH<sub>2</sub>N Linker), 2.10-2.05 (3s, 9H, 3 x CH<sub>3</sub> Ac), 1.56-1.28 (m, 6H, 3x CH<sub>2</sub> Linker). HRMS-MALDI: (M + Na<sup>+</sup>) calcd. 2369.8753, found 2369.8722.

*O*-sulfation: Hexasaccharide **64** (59.2 mg, 0.025 mmol) was dissolved in DMF (1.76 mL) and *O*-sulfated according to the general procedure for *O*-sulfation providing **65** as sodium salt (53.3 mg, 80%). [ $\alpha$ ]<sub>D</sub><sup>23</sup> -32.1 (*c* = 1.3, CHCl<sub>3</sub>); <sup>1</sup>H NMR (500 MHz, CD<sub>3</sub>OCD<sub>3</sub>): δ 7.85-7.80 (m, 2H, CH Aromatic), 7.66-7.60 (m, 2H, CH Aromatics), 7.50-7.21 (m, 40H, CH Aromatic), 5.42 (bs, 1H, H1<sup>D</sup>), 5.36 (d, 1H, J = 3.8 Hz, H1<sup>C</sup>), 5.33 (d, 1H, J = 8.2 Hz, H1<sup>B</sup>), 5.25 (d, 1H, J = 8.2 Hz, H1<sup>F</sup>), 5.18-5.15 (m, 3H, CH<sub>2</sub> Cbz, CHHBn), 5.11-5.09 (m, 2H, H2<sup>D</sup>, CHHBn), 5.03-4.99 (m, 4H, CHHBn, H2<sup>B</sup>, H2<sup>F</sup>, H1<sup>E</sup>), 4.95 (t, 1H, J = 9.6 Hz, H4<sup>F</sup>), 4.92 (d, 1H, J = 1.8 Hz, H5<sup>D</sup>), 4.87-4.48

(m, 12H incl. H1<sup>A</sup>: bs at 4.87, 8 x CHHBn, NCH<sub>2</sub>Bn, CHH Fmoc), 4.42 (dd, 1H,  $J = 6.8$  Hz,  $J = 10.5$  Hz, CHH Fmoc), 4.36-4.32 (m, 5H, H5<sup>B</sup>, H6a<sup>A</sup>, H6a<sup>E</sup>, H6a<sup>C</sup>, H5<sup>F</sup>), 4.27 (t, 1H,  $J = 6.8$  Hz, CH Fmoc), 4.23-4.4.16 (m, 4H, H6b<sup>E</sup>, H6b<sup>A</sup>, H6b<sup>C</sup>, H4<sup>B</sup>), 4.10-4.01 (m, 6H, H3<sup>B</sup>, H4<sup>D</sup>, H3<sup>F</sup>, H3<sup>D</sup>, H4<sup>E</sup>, H4<sup>A</sup>), 3.94 (t, 1H,  $J = 9.6$  Hz, H4<sup>C</sup>), 3.85-3.81 (bm, 9H, H5<sup>E</sup>, H3<sup>A</sup>, H5<sup>C</sup>, H3<sup>C</sup>, H3<sup>E</sup>, OCHH Linker, CO<sub>2</sub>CH<sub>3</sub><sup>D</sup>), 3.59 (dd, 1H,  $J = 3.6$  Hz,  $J = 10.4$  Hz, H2<sup>C</sup>), 3.53, 3.52 (2s, 6H, CO<sub>2</sub>CH<sub>3</sub><sup>F</sup>, CO<sub>2</sub>CH<sub>3</sub><sup>B</sup>), 3.37-3.35 (m, 2H incl. H2<sup>C</sup>: dd,  $J = 3.5$  Hz,  $J = 10.4$  Hz at 3.36, H2<sup>E</sup>, OCHH Linker), 3.29-3.20 (bm, 3H, H2<sup>A</sup>, CH<sub>2</sub>N Linker), 2.15, 2.11, 2.00 (3s, 9H, 3 x CH<sub>3</sub> Ac), 1.56-1.25 (m, 6H, 3 x CH<sub>2</sub> Linker). ESI-MS:  $m/z$ : calcd. for C<sub>122</sub>H<sub>128</sub>N<sub>10</sub>Na<sub>3</sub>O<sub>47</sub>S<sub>3</sub>: 1292.3710, found: 1292.3712 [M-2H]<sup>2-</sup>; calcd. C<sub>122</sub>H<sub>127</sub>N<sub>10</sub>Na<sub>3</sub>O<sub>47</sub>S<sub>3</sub>: 861.2449, found: 861.2446 [M-3H]<sup>3-</sup>.

*Fmoc cleavage and saponification of methyl esters and de-O-acetylation*: Hexasaccharide **65** (53.3 mg, 0.020 mmol) was dissolved in DMF (1.25 mL) and subjected to Fmoc cleavage according to the general procedure. The resulting product was directly used in the next step. The compound (33.0 mg, 0.0124 mmol) was dissolved in THF (1.4 mL) and subjected to saponification and de-O-acetylation according to the general procedure of saponification of methyl ester and de-O-acetylation to give **66** as sodium salt (23.9 mg, 82%).  $[\alpha]_D^{23} +36.9$  ( $c = 0.48$ , CH<sub>3</sub>OH); <sup>1</sup>H NMR (500 MHz, CD<sub>3</sub>OCD<sub>3</sub>):  $\delta$  7.47-7.19 (m, 40H, CH Aromatic), 5.53 (d, 1H,  $J = 3.5$  Hz, H1<sup>c</sup>), 5.30 (bs, 1H, H1<sup>E</sup>), 5.17-4.56 (m, 18H incl. H1<sup>E</sup> at 5.14, H1<sup>B</sup> at 4.90, H1<sup>A</sup> at 4.82, H1<sup>F</sup> at 4.8, H5<sup>D</sup>, CH<sub>2</sub> Cbz, 6 x CH<sub>2</sub>Bn), 4.51-4.31 (m, 8H, NCH<sub>2</sub>Bn, H6a<sup>A</sup>, H6a<sup>C</sup>, H6a<sup>E</sup>, H6b<sup>A</sup>, H6b<sup>E</sup>, H6b<sup>C</sup>), 4.27-4.20 (m, 4H, H3<sup>D</sup>, H4<sup>D</sup>, H5<sup>A</sup>, H5<sup>E</sup>), 4.08-3.82 (m, 8H, H4<sup>E</sup>, H4<sup>C</sup>, H4<sup>A</sup>, H5<sup>B</sup>, H3<sup>E</sup>, H3<sup>C</sup>, H3<sup>A</sup>, H2<sup>D</sup>, H3<sup>D</sup>), 3.72 (t, 1H,  $J = 8.9$  Hz, H3<sup>B</sup>), 3.59-3.47 (m, 5H, OCH<sub>2</sub> Linker, H4<sup>A</sup>, H4<sup>F</sup>, H2), 3.51-3.47 (m, 2H incl. H2<sup>E</sup>: dd,  $J = 3.2$  Hz,  $J = 9.8$  Hz at 3.50, H3<sup>F</sup>), 3.89 (t, 1H,  $J = 9.8$  Hz, H2<sup>B</sup>), 3.34-3.24 (m, 2H, CH<sub>2</sub>N Linker), 3.18 (m, 1H, H2<sup>A</sup>), 3.14 (dd, 1H,  $J = 3.5$  Hz,  $J = 9.8$  Hz, H2<sup>C</sup>), 1.57-1.28 (m, 6H, 3 x CH<sub>2</sub> Linker). ESI-MS:  $m/z$ : calcd. for

$C_{98}H_{104}N_{10}Na_6O_{42}S_3$ : 1097.2976, found: 1097.2973  $[M-2H]^{2-}$ ; calcd.  $C_{98}H_{103}N_{10}Na_6O_{42}S_3$ : 731.1960, found: 731.1951  $[M-3H]^{3-}$ .

*Reduction of azide group*: Hexasaccharide **66** (23.9 mg, 0.0102 mmol) was dissolved in 1:1 mixture of THF and (0.1 M) NaOH (0.102 mL, 0.102 mmol, 10 eq. per azido group) and subjected to azide reduction to obtain hexasaccharide **67** (17.3 mg, 65%).  $^1H$ NMR (500 MHz,  $CD_3OCD_3$ ):  $\delta$  7.50-7.18 (m, 40H, CH Aromatics), 5.49 (d, 1H,  $J = 3.1$  Hz, H1<sup>c</sup>), 5.24 (d, 1H,  $J = 3.7$  Hz, H1<sup>D</sup>), 5.18-5.00 (m, 7H,  $CH_2$ Cbz, 2 x  $CH_2$ Bn, H1<sup>E</sup> at 5.10), 4.82-4.61 (m, 11H incl. H1<sup>F</sup> at 4.76, H1<sup>B</sup> at 4.68, H1<sup>A</sup> at 4.66, H5<sup>D</sup> at 4.72, 3 x  $CH_2$ Bn, CHHBn), 4.56-4.33 (m, 6H,  $NCH_2$ Bn, H6a<sup>A</sup>, H6a<sup>C</sup>, H6a<sup>E</sup>, CHHBn), 4.32-4.22 (m, 4H, H4<sup>D</sup>, H6b<sup>A</sup>, H6b<sup>E</sup>, H6b<sup>C</sup>), 4.16-4.03 (m, 5H, H5<sup>C</sup>, H5<sup>E</sup>, H4<sup>C</sup>, H4<sup>E</sup>, H4<sup>B</sup>), 3.93 (t, 1H,  $J = 9.3$  Hz, H3<sup>E</sup>), 3.90-3.75 (m, 5H, H2<sup>D</sup>, H5<sup>B</sup>, H3<sup>C</sup>, H3<sup>D</sup>, H3<sup>B</sup>), 3.66-3.56 (m, 4H, OCHH Linker, H2<sup>B</sup>, H4<sup>F</sup>, H3<sup>A</sup>), 3.51 (t, 1H,  $J = 8.9$  Hz, H3<sup>F</sup>), 3.40 (t, 1H,  $J = 9.1$  Hz, H2<sup>F</sup>), 3.32-3.23 (m, under  $CD_2HOD$  OCHH Linker,  $CH_2N$  Linker), 3.00 (bd, 1H,  $J = 8.9$  Hz, H2<sup>E</sup>), 2.80-2.72 (m, 2H incl. H2<sup>C</sup> at 2.79, H2<sup>A</sup> at 2.74), 1.55-1.21 (m, 6H, 3 x  $CH_2$  Linker). ESI-MS: $m/z$ : calcd. for  $C_{98}H_{110}N_4Na_6O_{42}S_3$ : 1058.3119, found: 1058.3131  $[M-2H]^{2-}$ ; calcd. for  $C_{98}H_{109}N_4Na_6O_{42}S_3$ : 705.2055 found: 705.2047  $[M-3H]^{3-}$ .

*Selective N-sulfation*<sup>2</sup>: Hexasaccharide **67** (17.3 mg, 0.008 mmol) was subjected to selective N-sulfation to obtain hexasaccharide **68** (10.2 mg, 50  $\mu$ mol).  $[\alpha]_D^{23} + 59.9$  ( $c = 0.47$ ,  $CH_3OH$ ).  $^1H$  NMR (500 MHz,  $CD_3OCD_3$ ):  $\delta$  7.53-7.15 (m, 40H, CH Aromatics), 5.65 (d, 1H,  $J = 3.1$  Hz, H1<sup>c</sup>), 5.33 (bs, 1H, H1<sup>E</sup>), 5.25 (bs, 1H, H1<sup>E</sup>), 5.18-5.08 (m, 4H incl. H1<sup>A</sup> at 5.10,  $CH_2$ Cbz, CHHBn), 4.94-4.58 (m, under  $CD_3OH$  peak, 14H incl. H5<sup>D</sup> at 4.82, H1<sup>F</sup> at 4.83, H5<sup>D</sup> at 4.76, eleven CHHBn), 4.51-4.19 (m, 9H,  $NCH_2$ Bn, H6a<sup>A</sup>, H6a<sup>C</sup>, H6a<sup>E</sup>, H6b<sup>A</sup>, H6b<sup>E</sup>, H6b<sup>C</sup>, H4<sup>D</sup>), 4.11-3.79 (m, 6H, H5<sup>C</sup>, H4<sup>B</sup>, H5<sup>E</sup>, H5<sup>B</sup>, H4<sup>E</sup>, H2<sup>D</sup>), 3.90-3.79 (m, 5H, H5<sup>A</sup>, H4<sup>A</sup>, H3<sup>C</sup>, H3<sup>B</sup>, H3<sup>E</sup>), 3.70-3.54 (m, 6H, H5<sup>F</sup>, OCHH Linker, H3<sup>A</sup>, H4<sup>F</sup>, H2<sup>B</sup>, H3<sup>F</sup>), 3.47-3.23 (m, 7H, H2<sup>C</sup>, H2<sup>E</sup>, H2<sup>A</sup>, H2<sup>B</sup>,

OCHH Linker, CH<sub>2</sub>N Linker), 1.67-1.28 (m, 6H, 3 x CH<sub>2</sub> Linker). ESI-MS: *m/z*: calcd. for C<sub>98</sub>H<sub>107</sub>N<sub>4</sub>Na<sub>9</sub>O<sub>51</sub>S<sub>6</sub>: 1178.2471, found: 1178.2475 [M-2H]<sup>2-</sup>; calcd. for C<sub>98</sub>H<sub>106</sub>N<sub>4</sub>Na<sub>9</sub>O<sub>51</sub>S<sub>6</sub>: 705.2055, found 705.2047 [M-3H]<sup>3-</sup>.

*Global debenzoylation*: A solution of the hexasaccharide **68** (10.2 mg, 0.004 mmol) in (CH<sub>3</sub>OH/H<sub>2</sub>O 1:1, v/v) (1 mL) was subjected to debenzoylation according to the general procedure for global debenzoylation to give hexasaccharide **69** (4.8 mg, 67%). NMR data reported in the experimental section of paper.

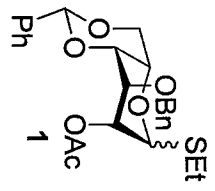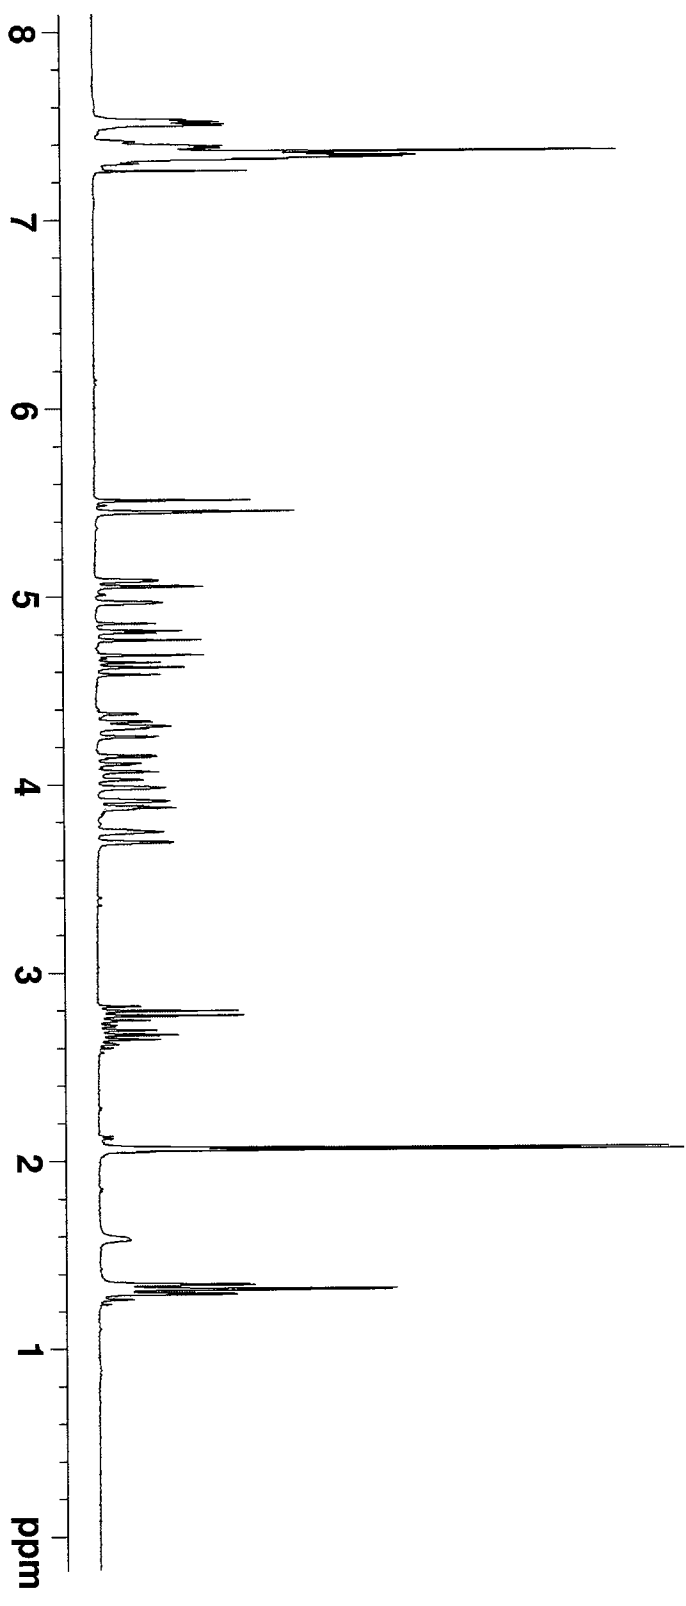

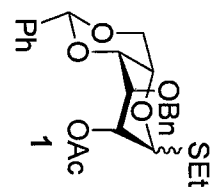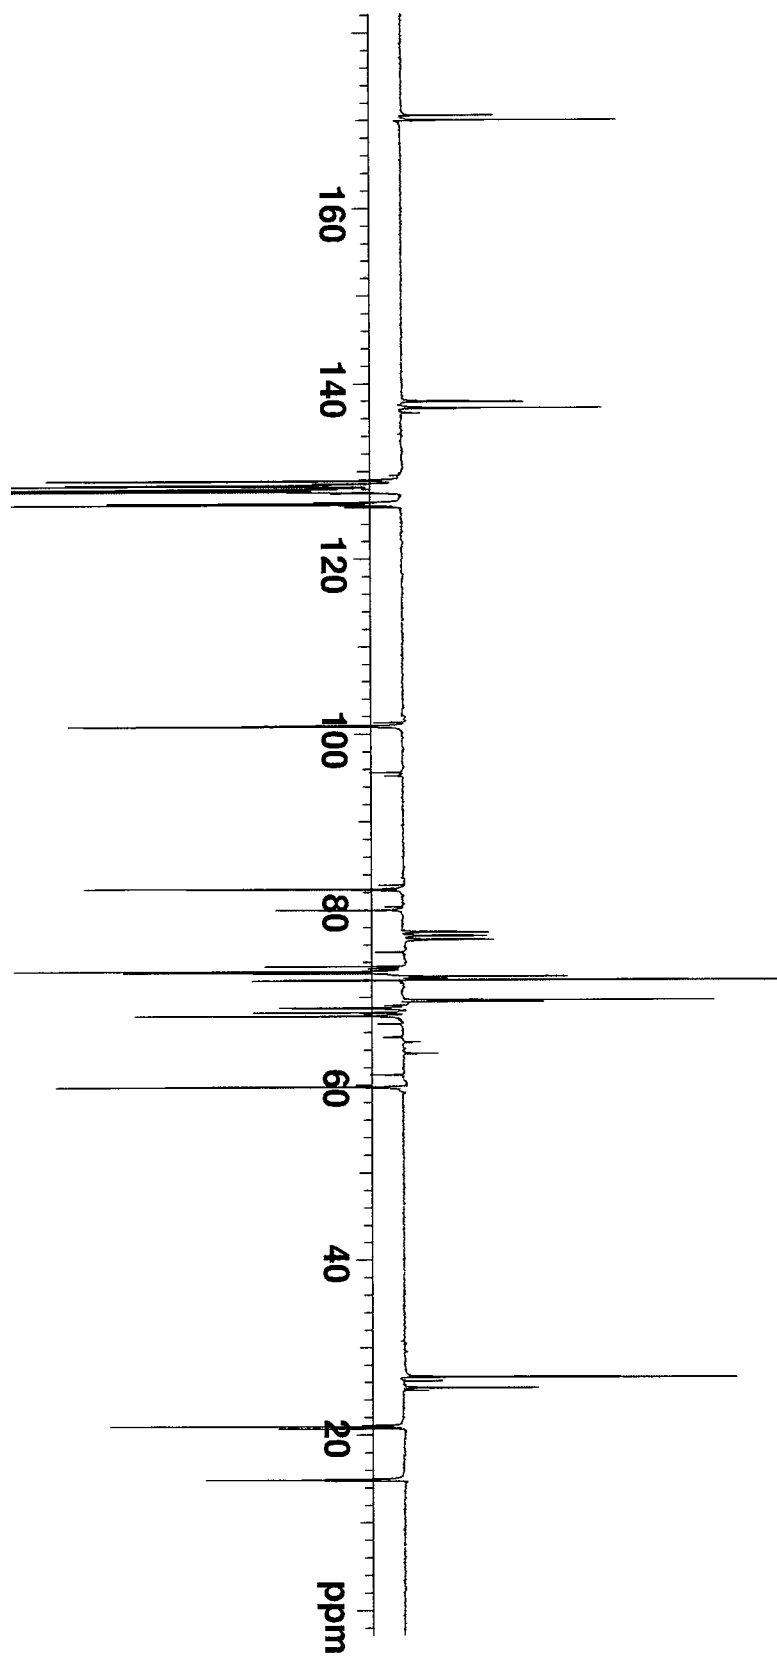

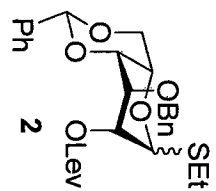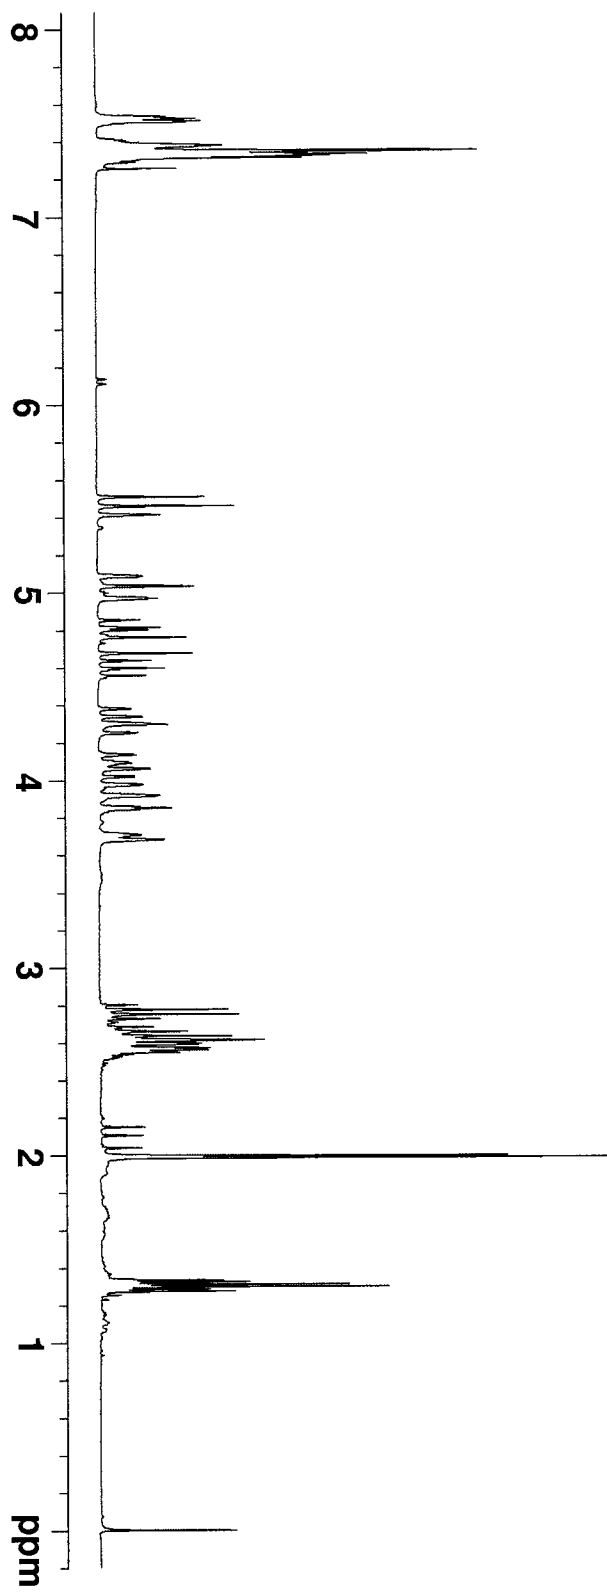



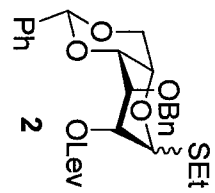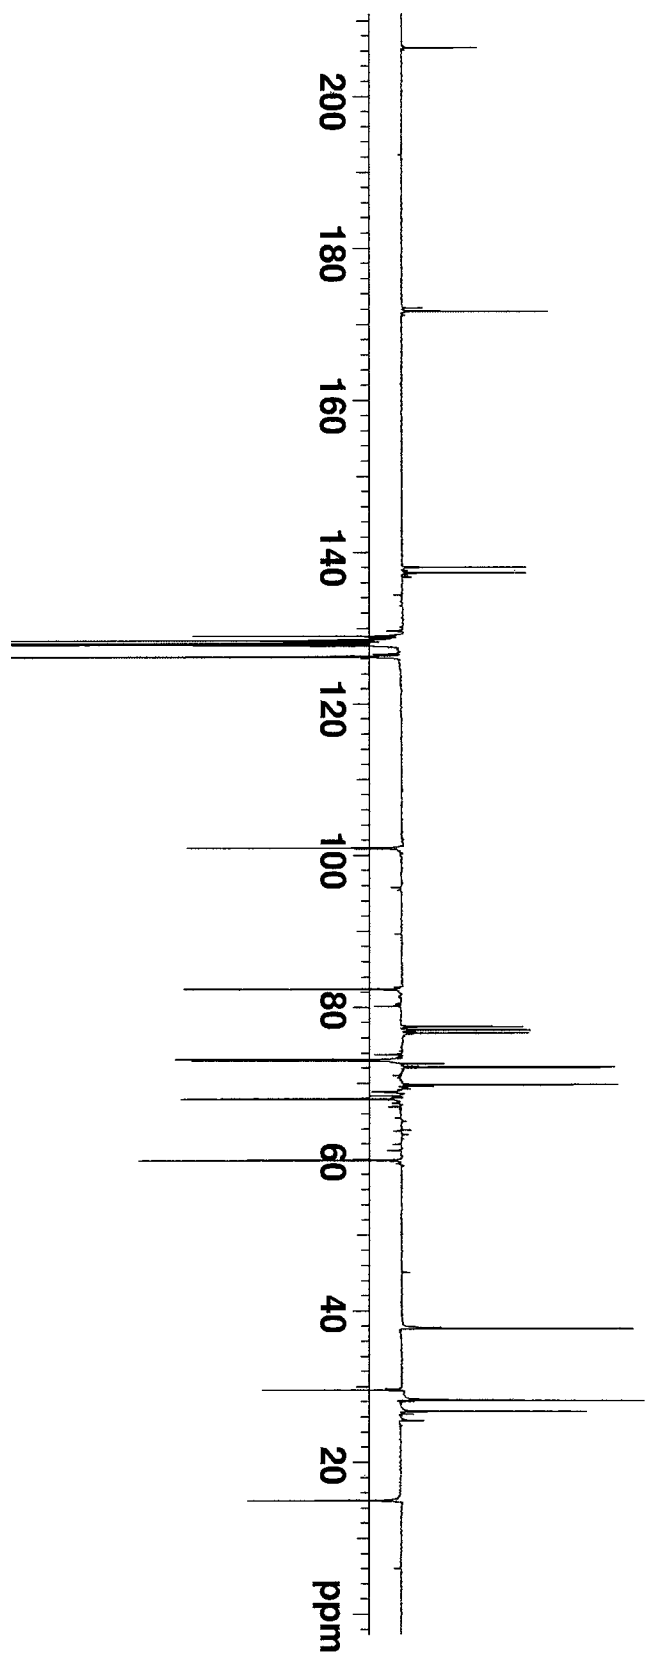

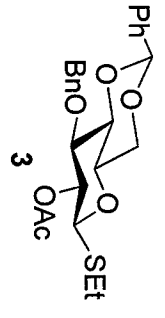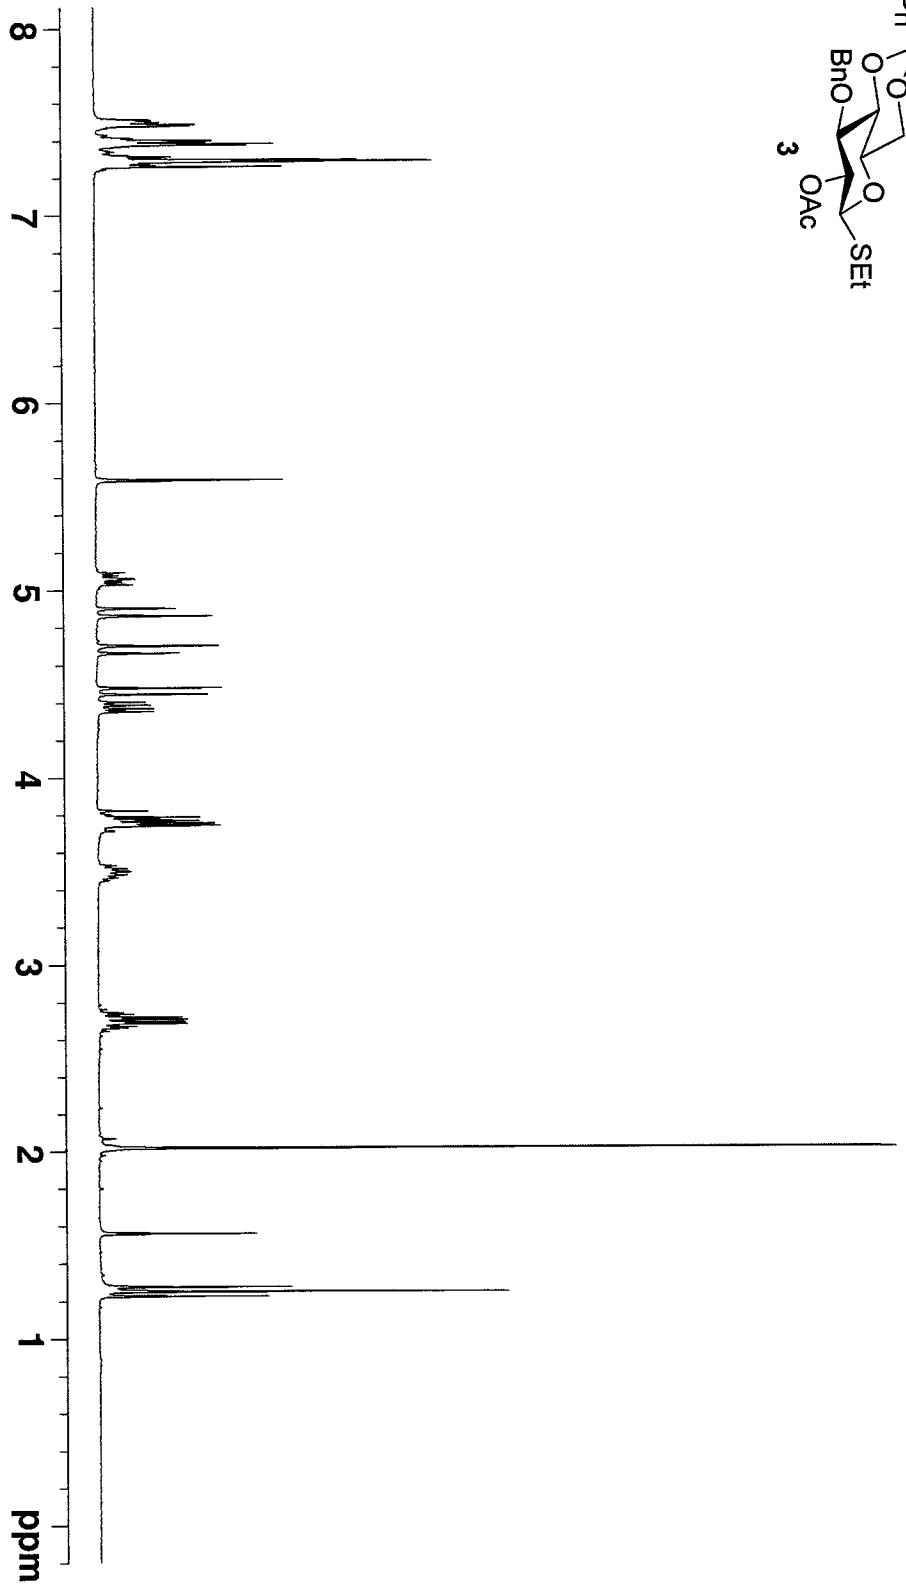

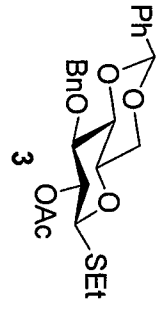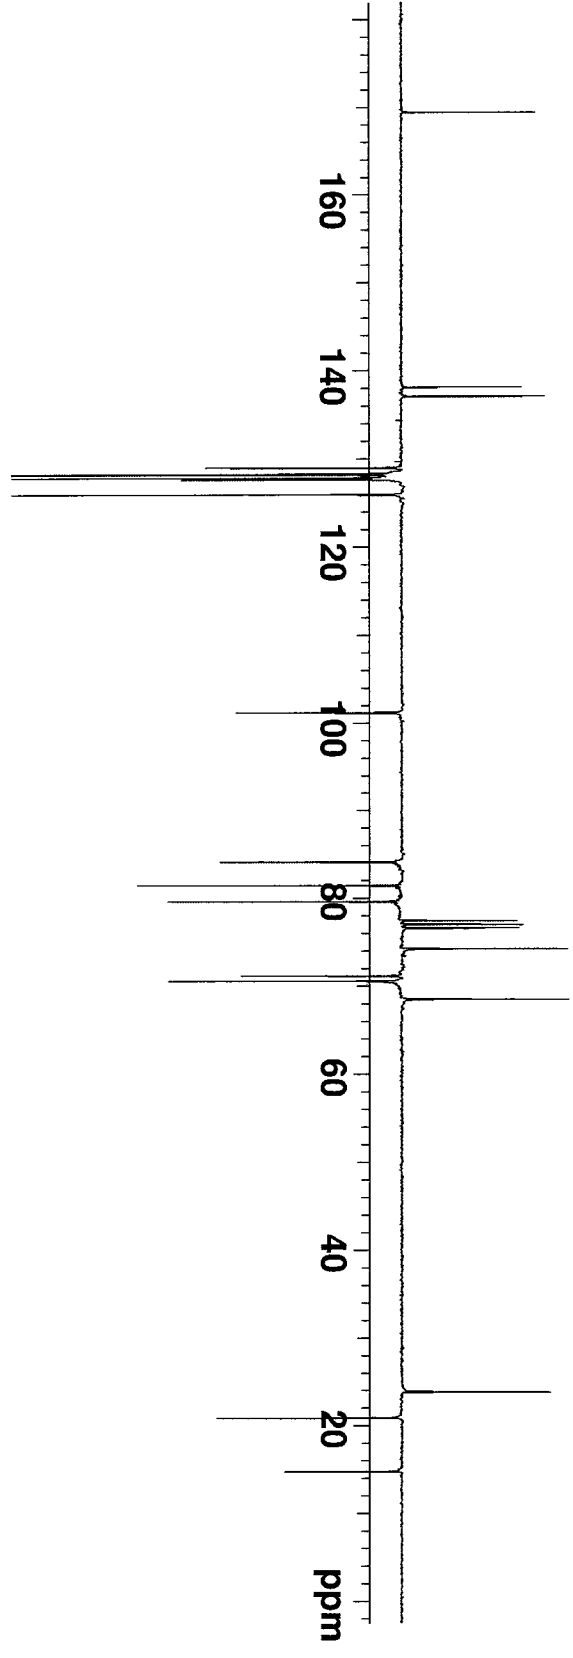

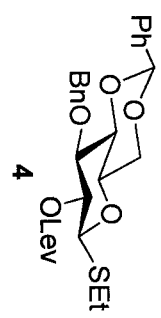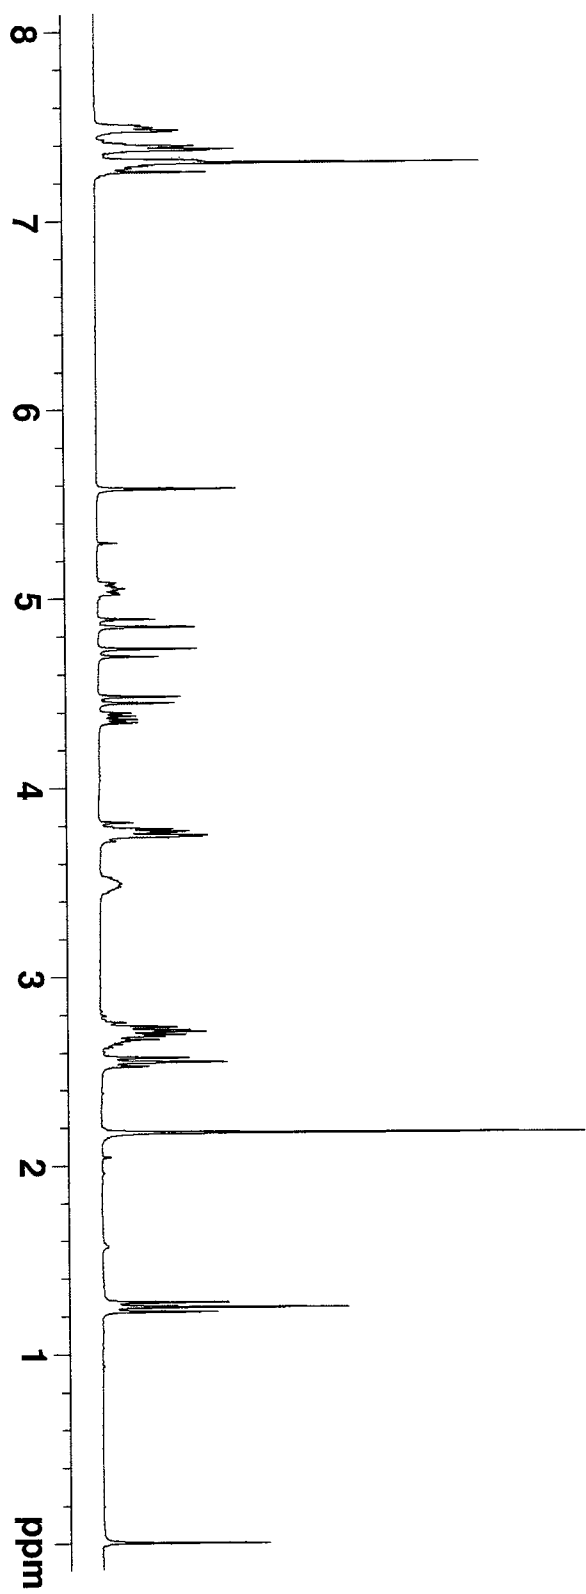

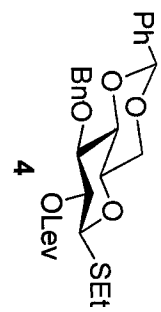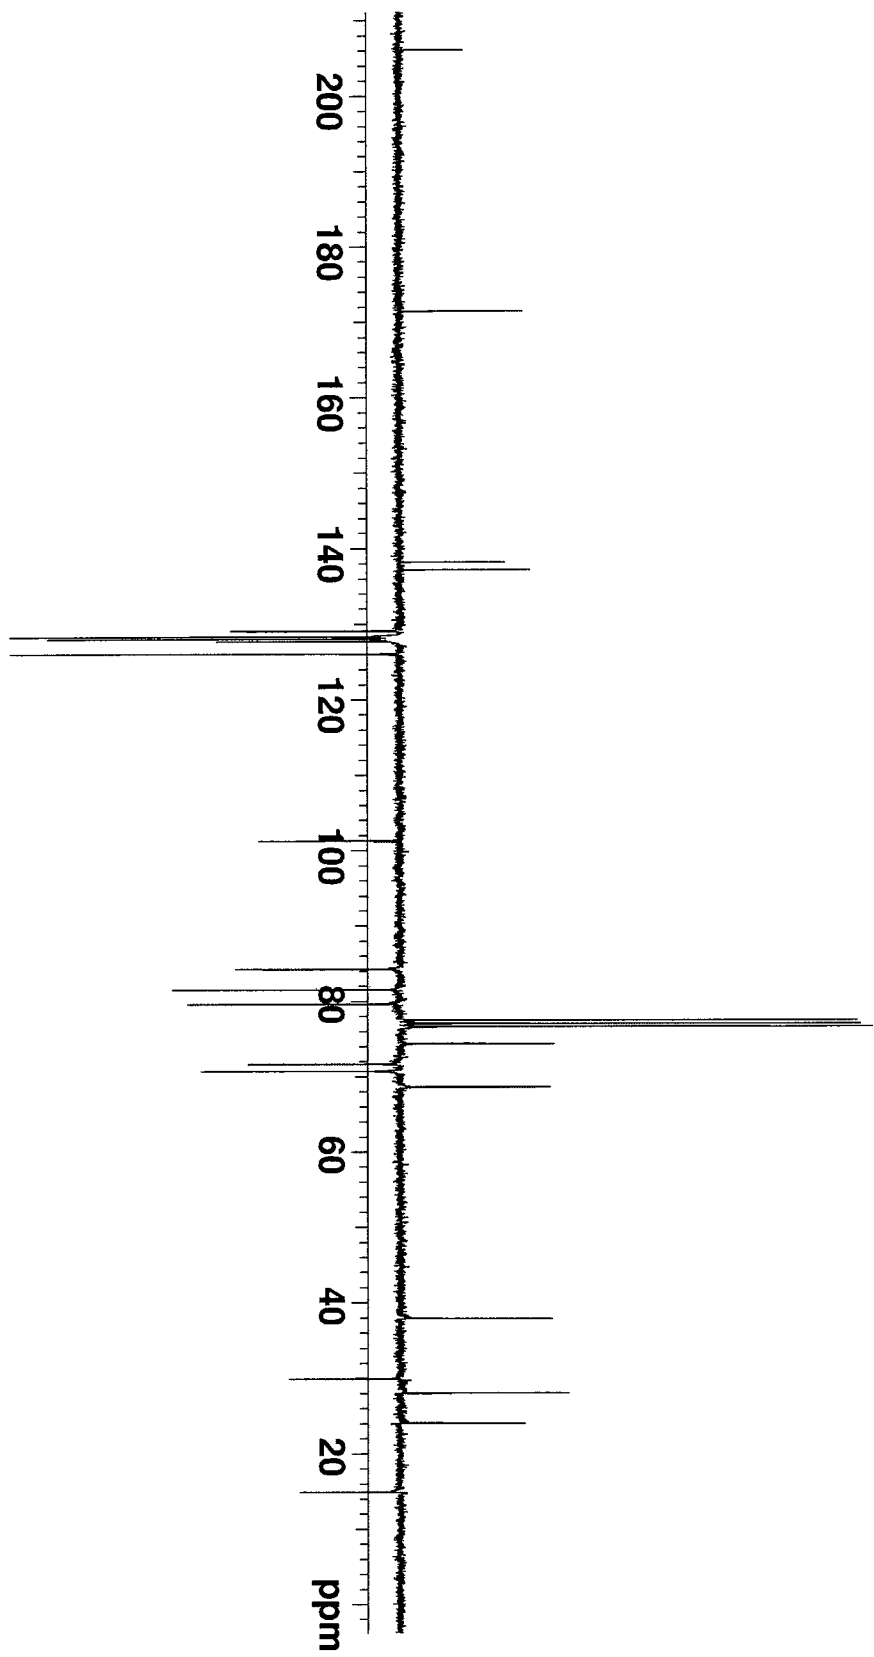

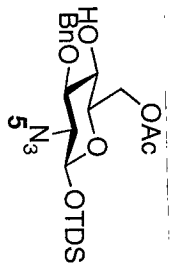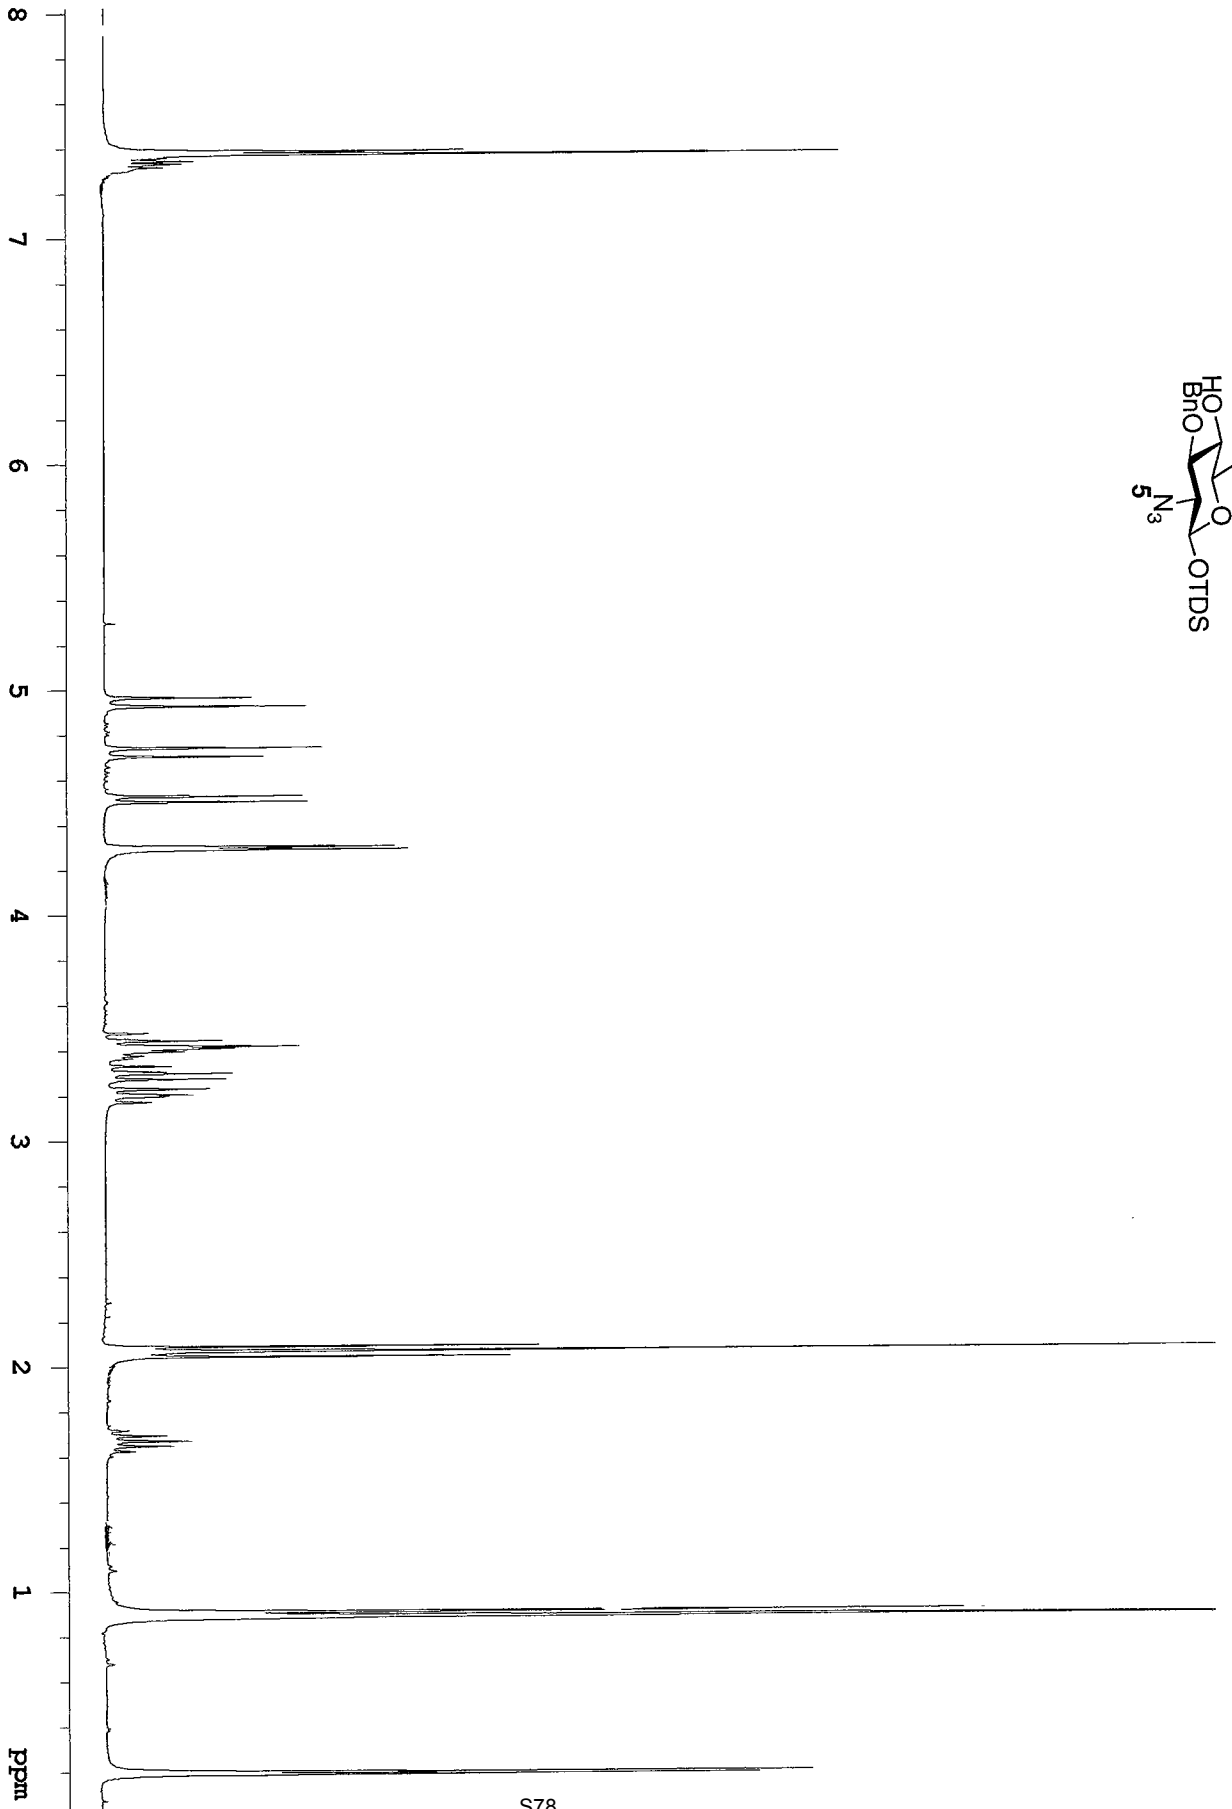

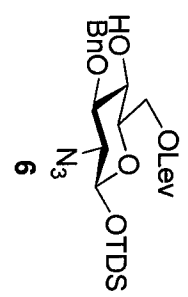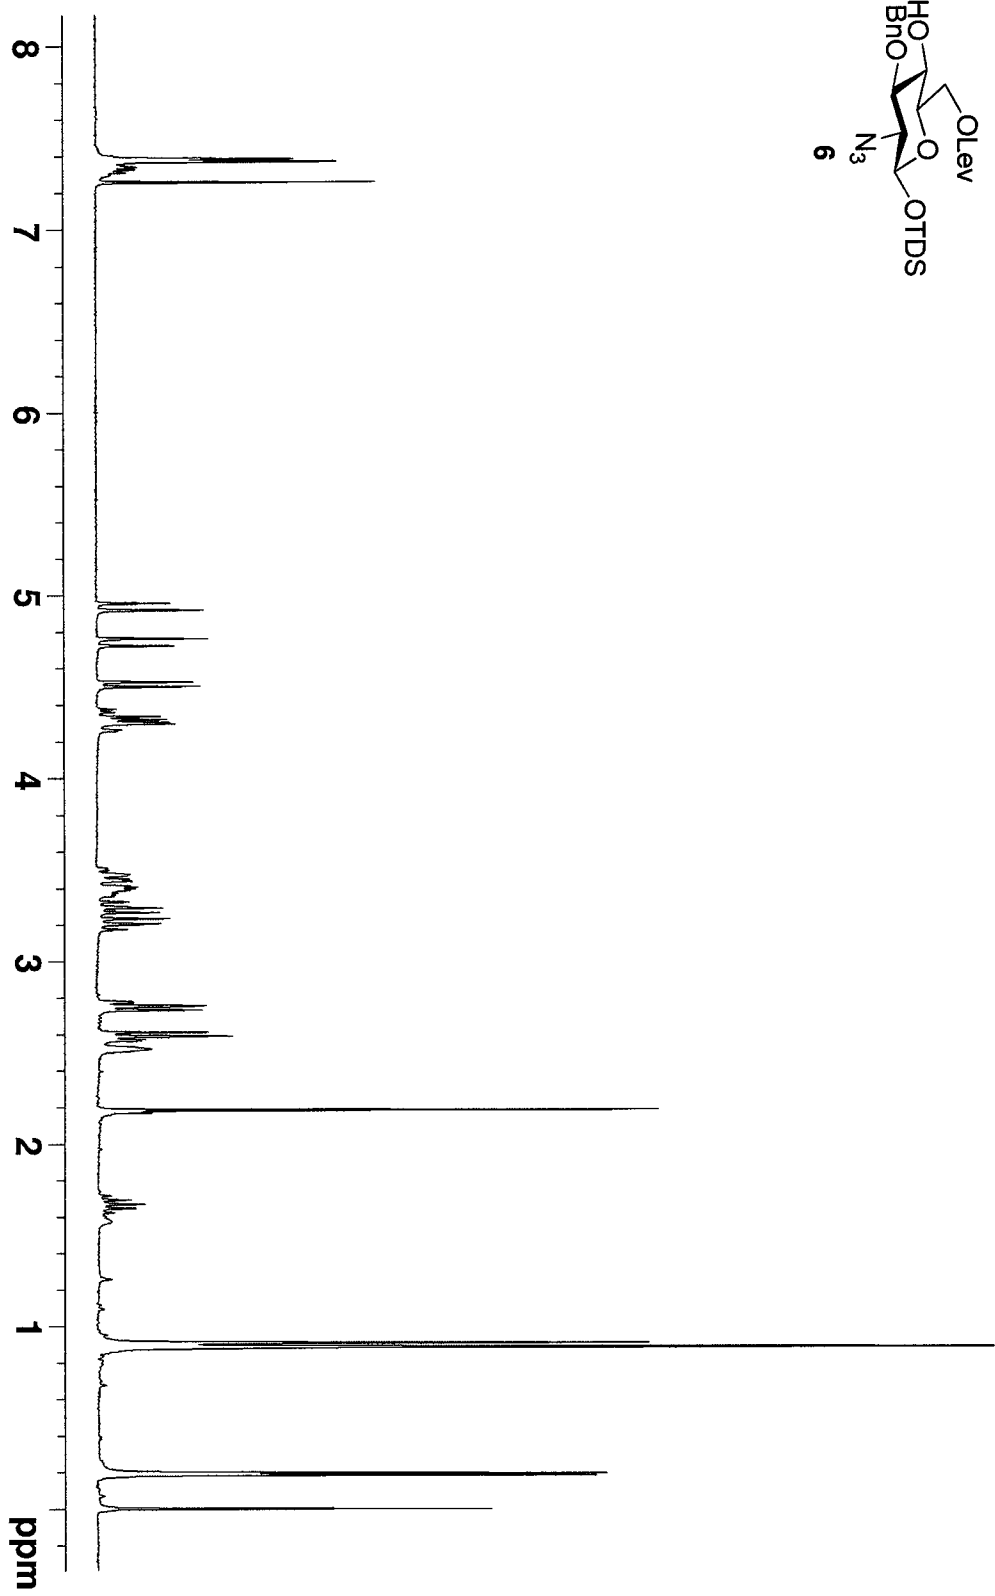

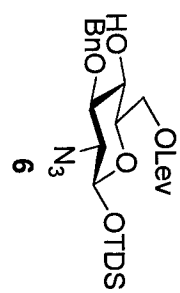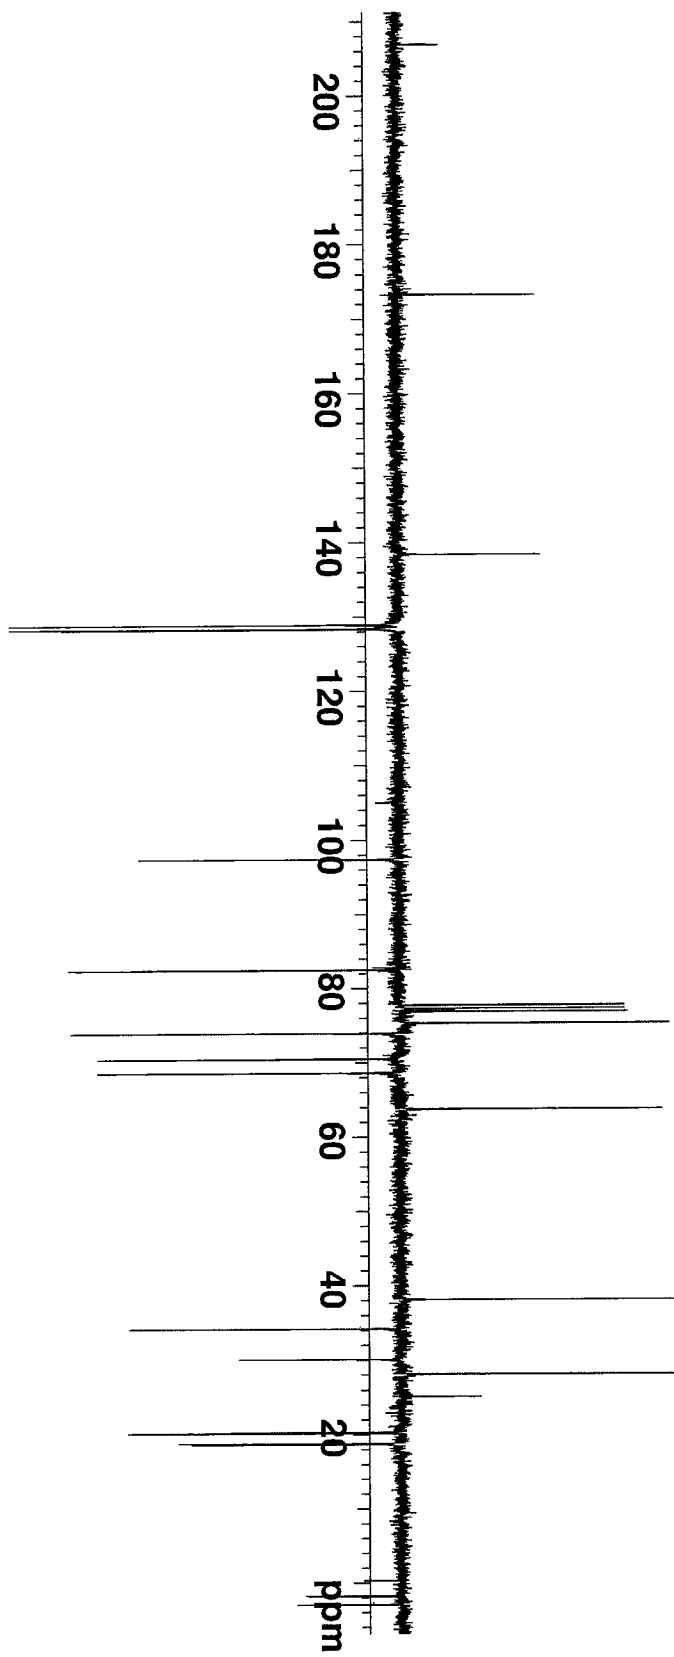



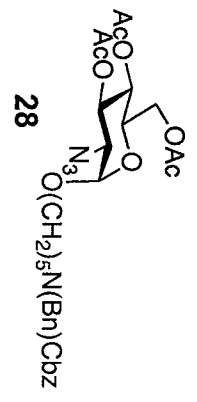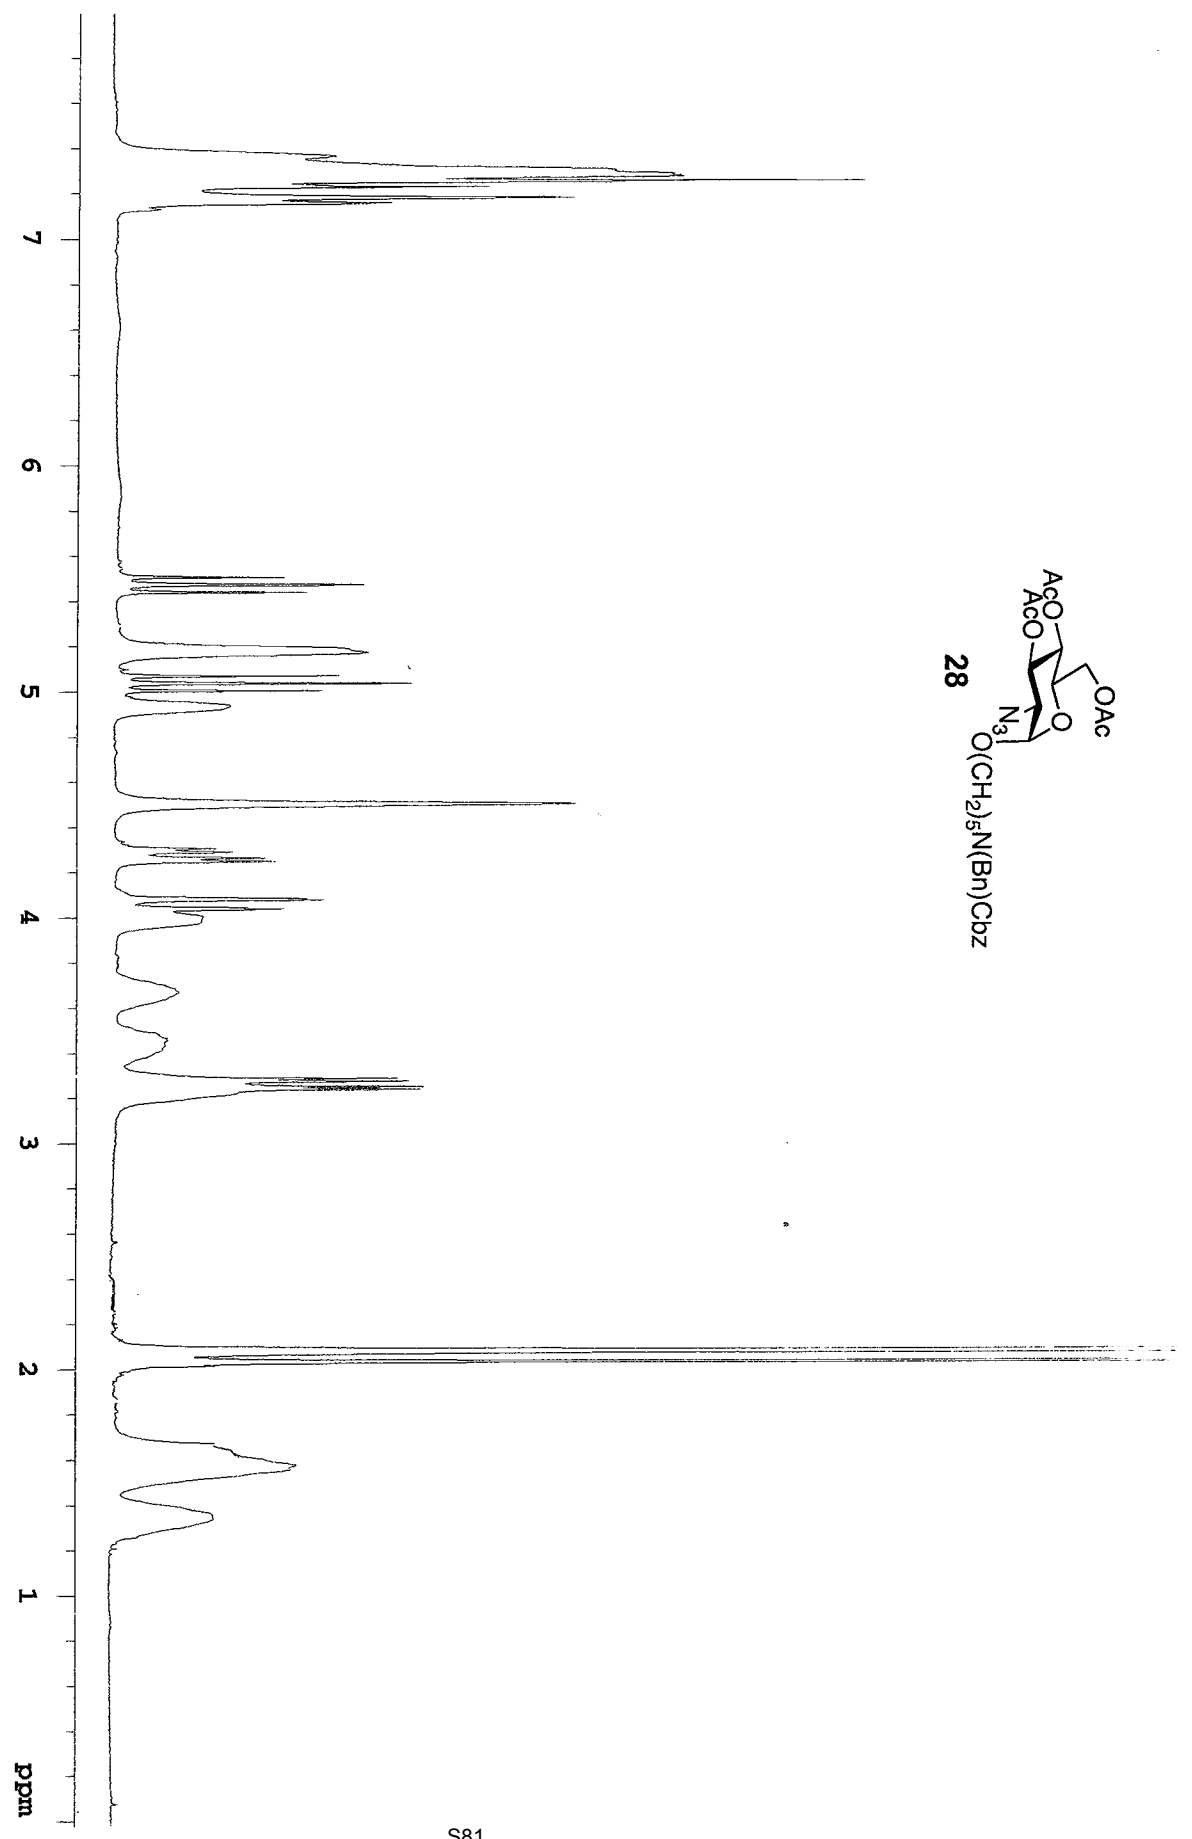

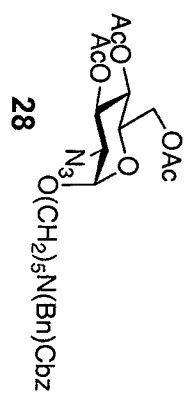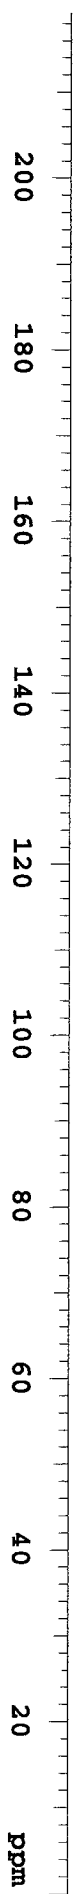

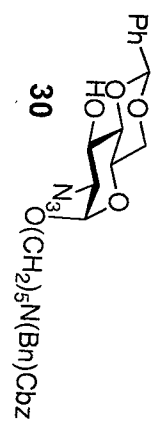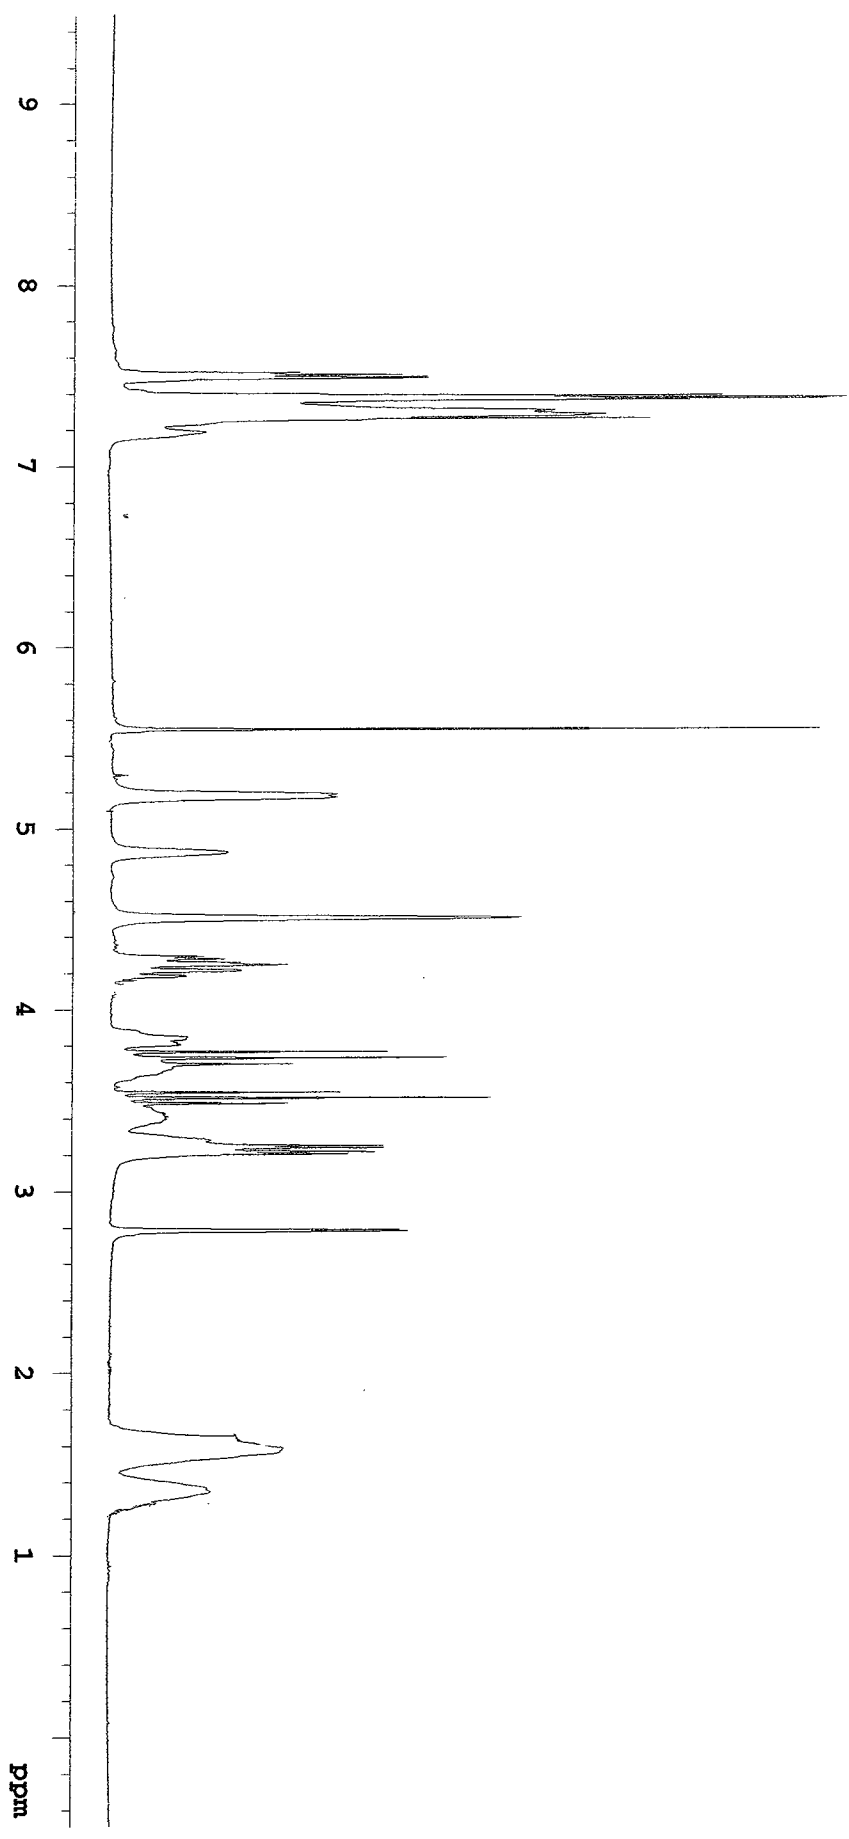

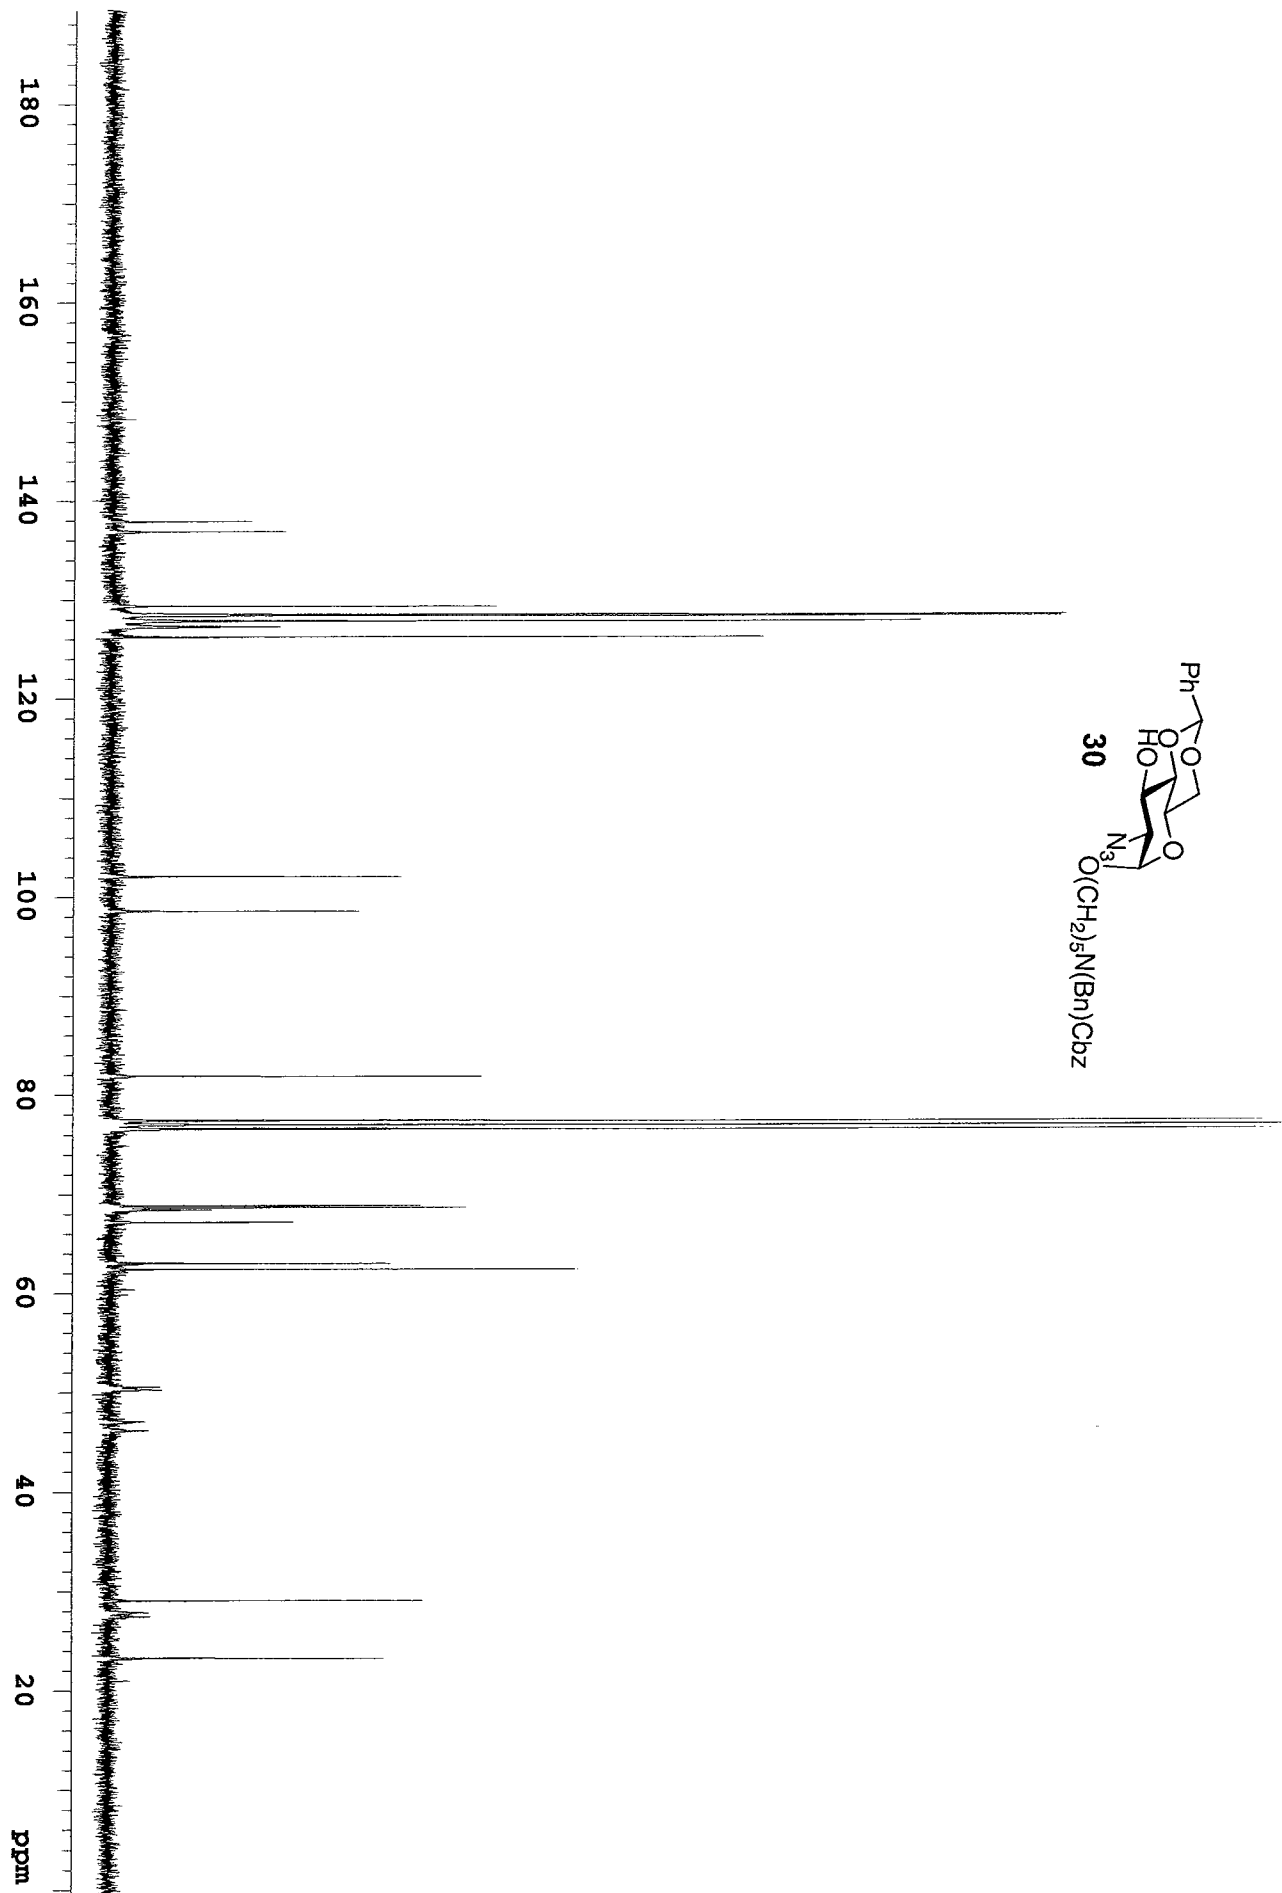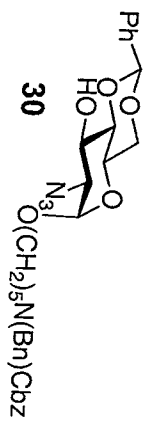

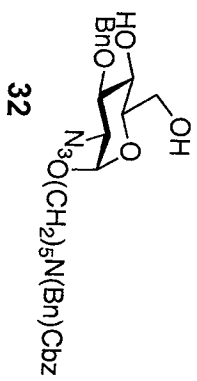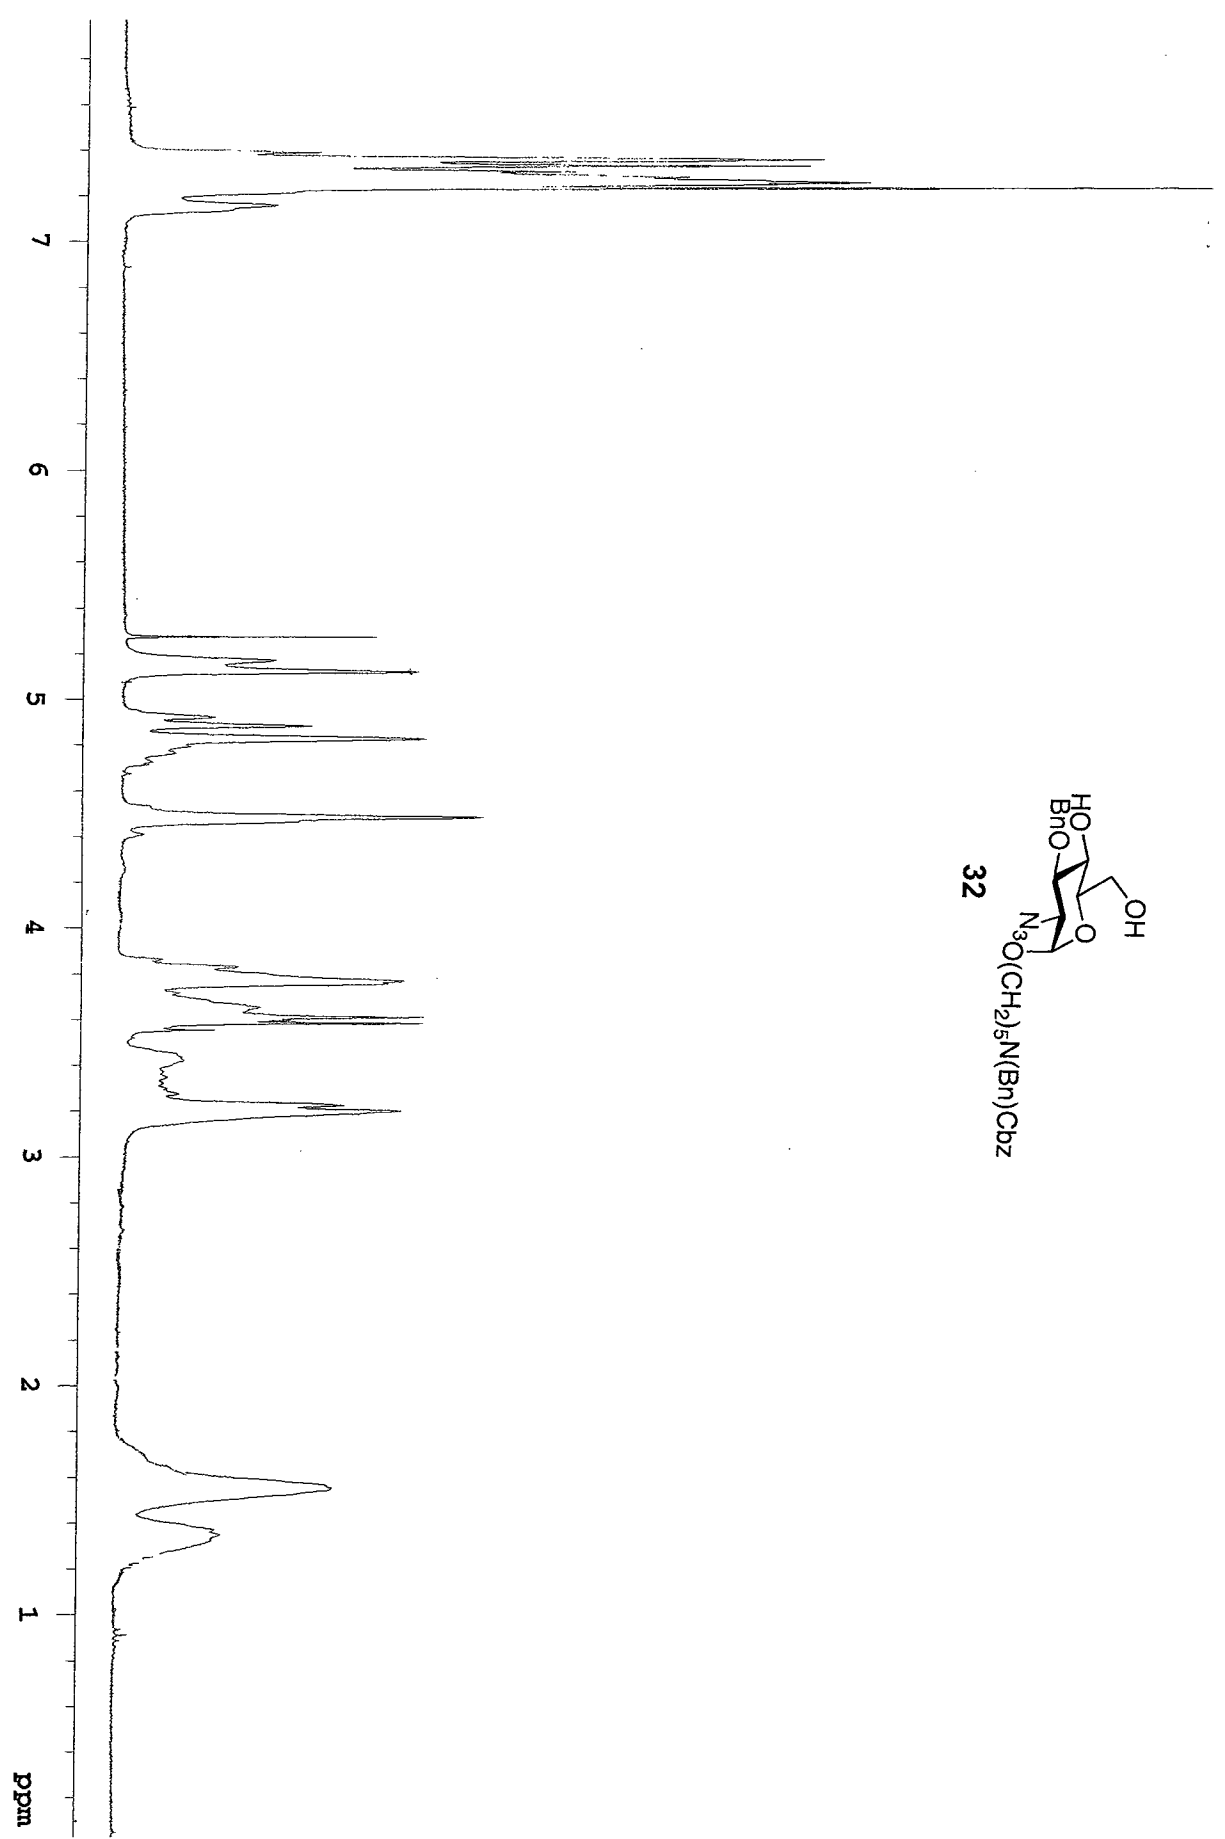

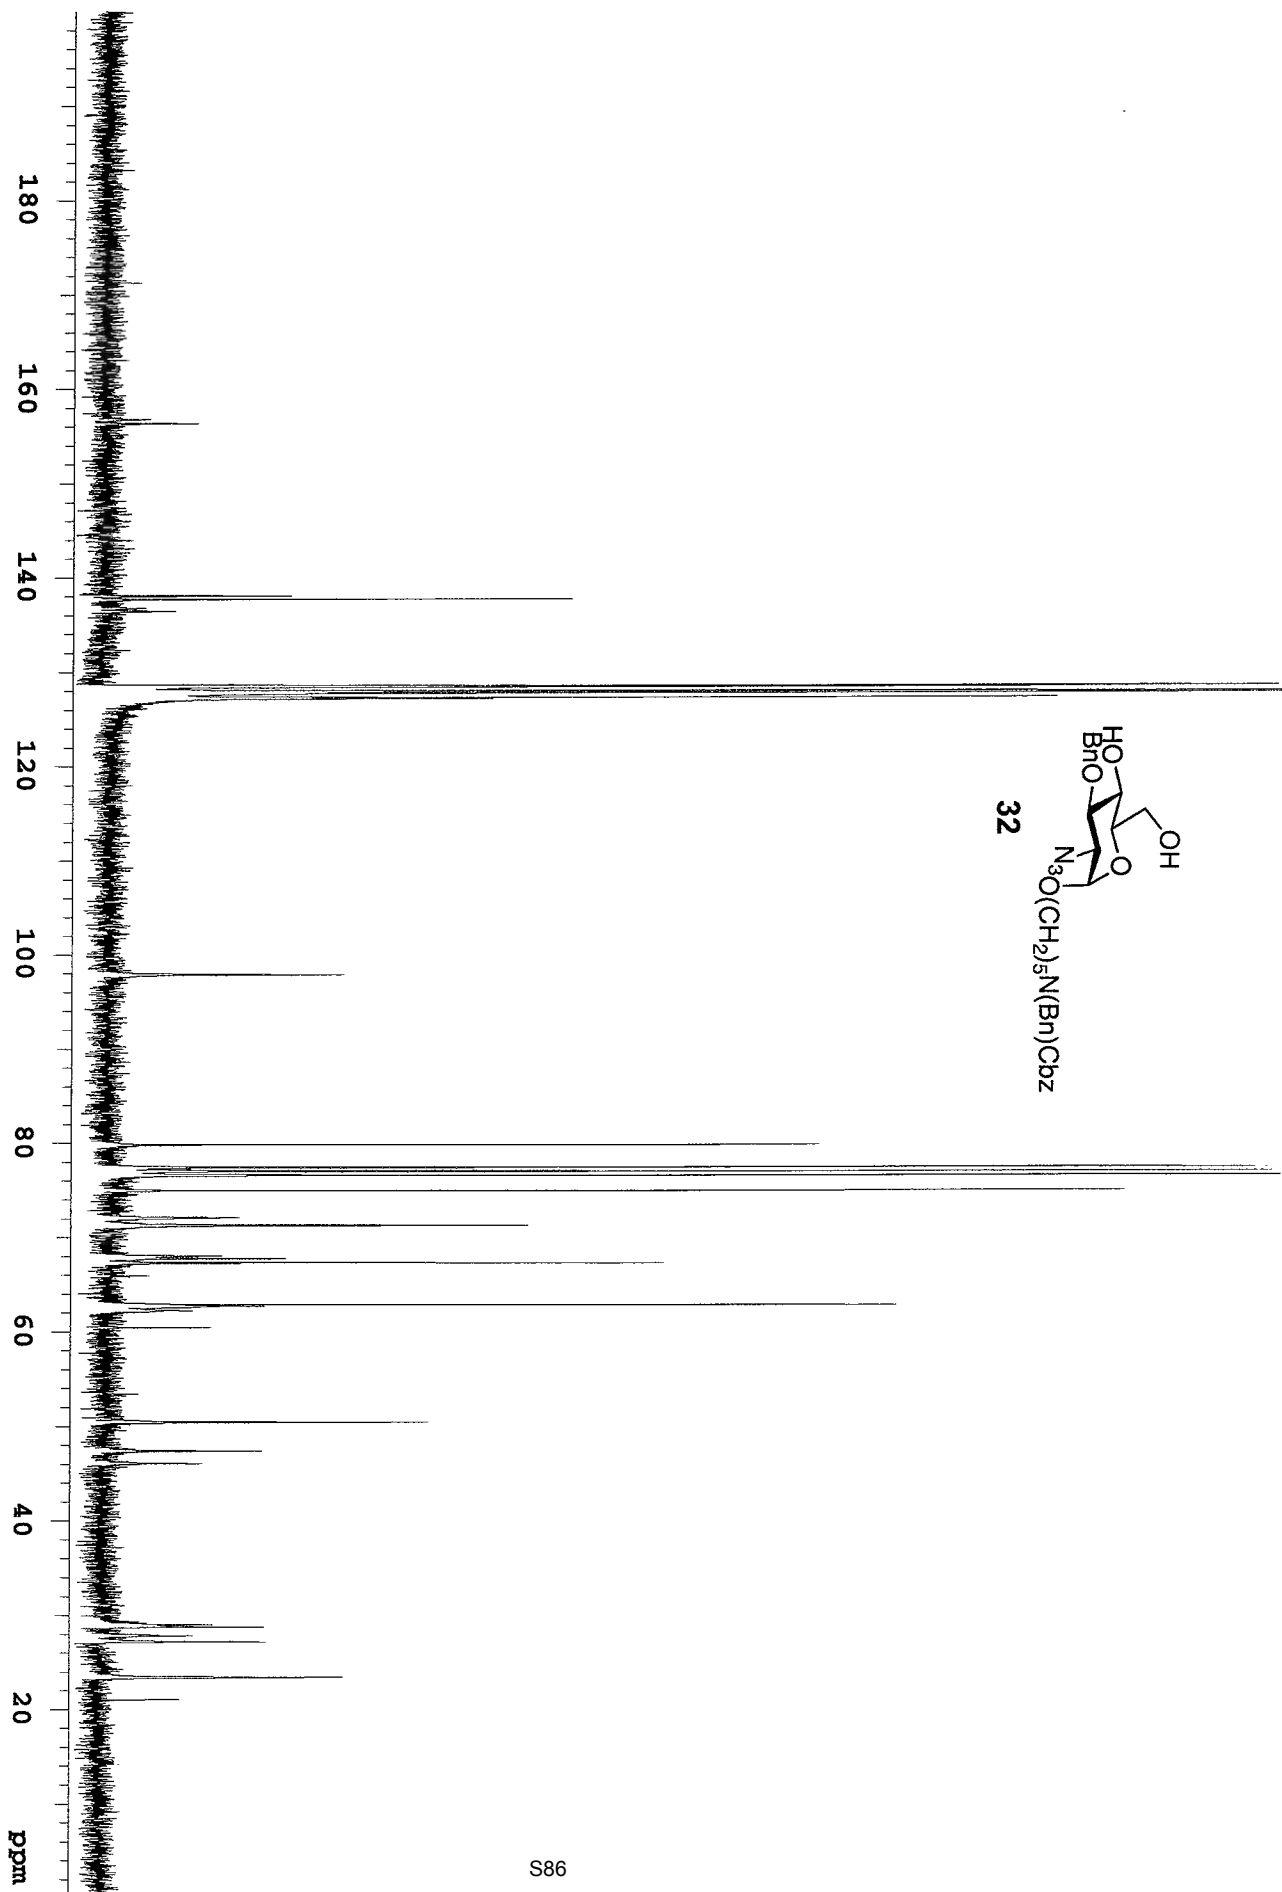

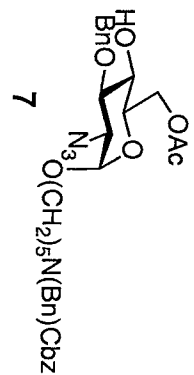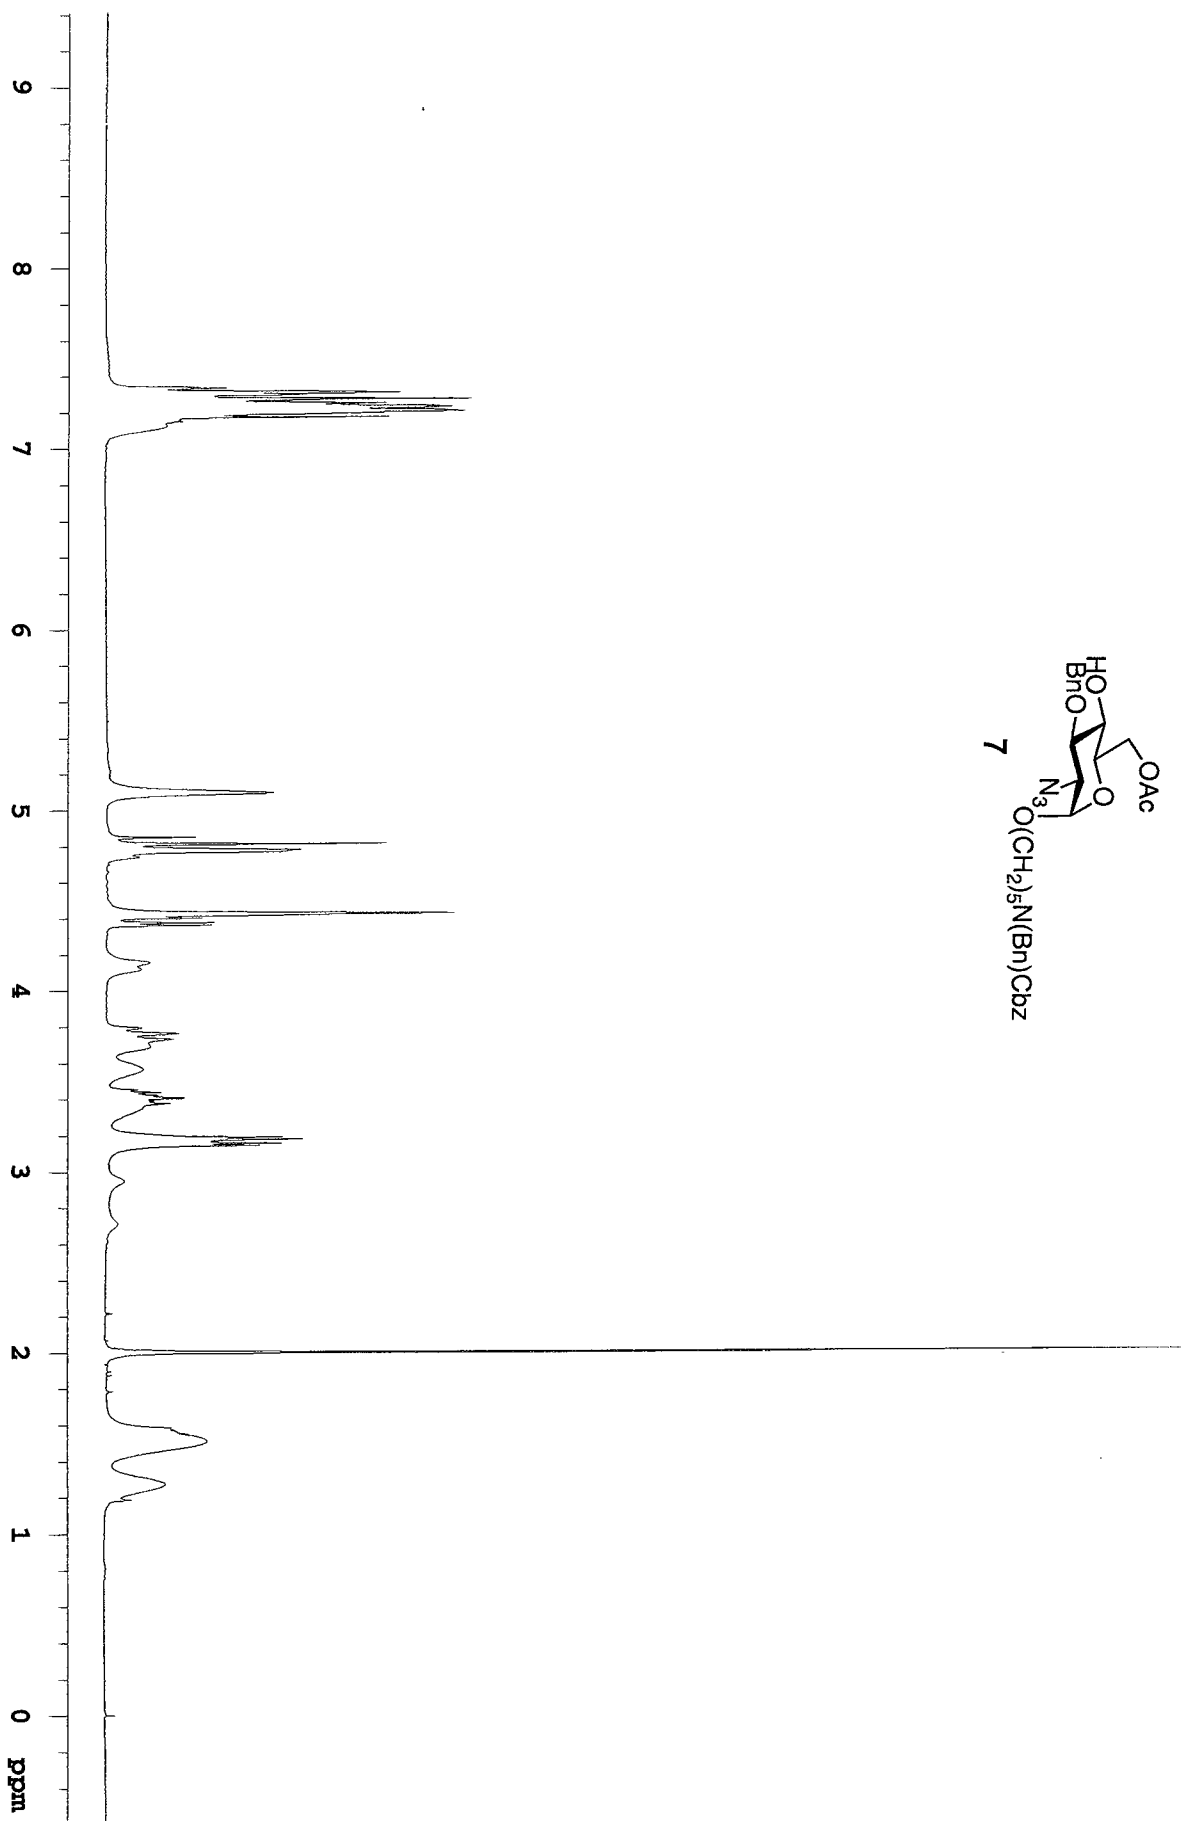

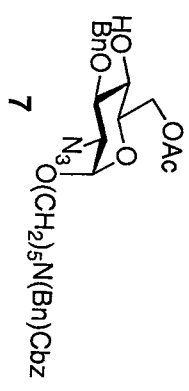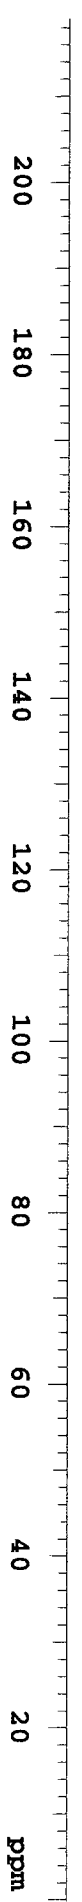



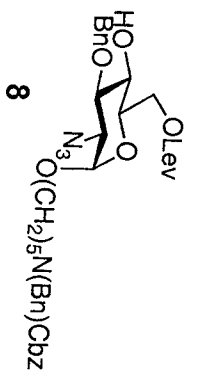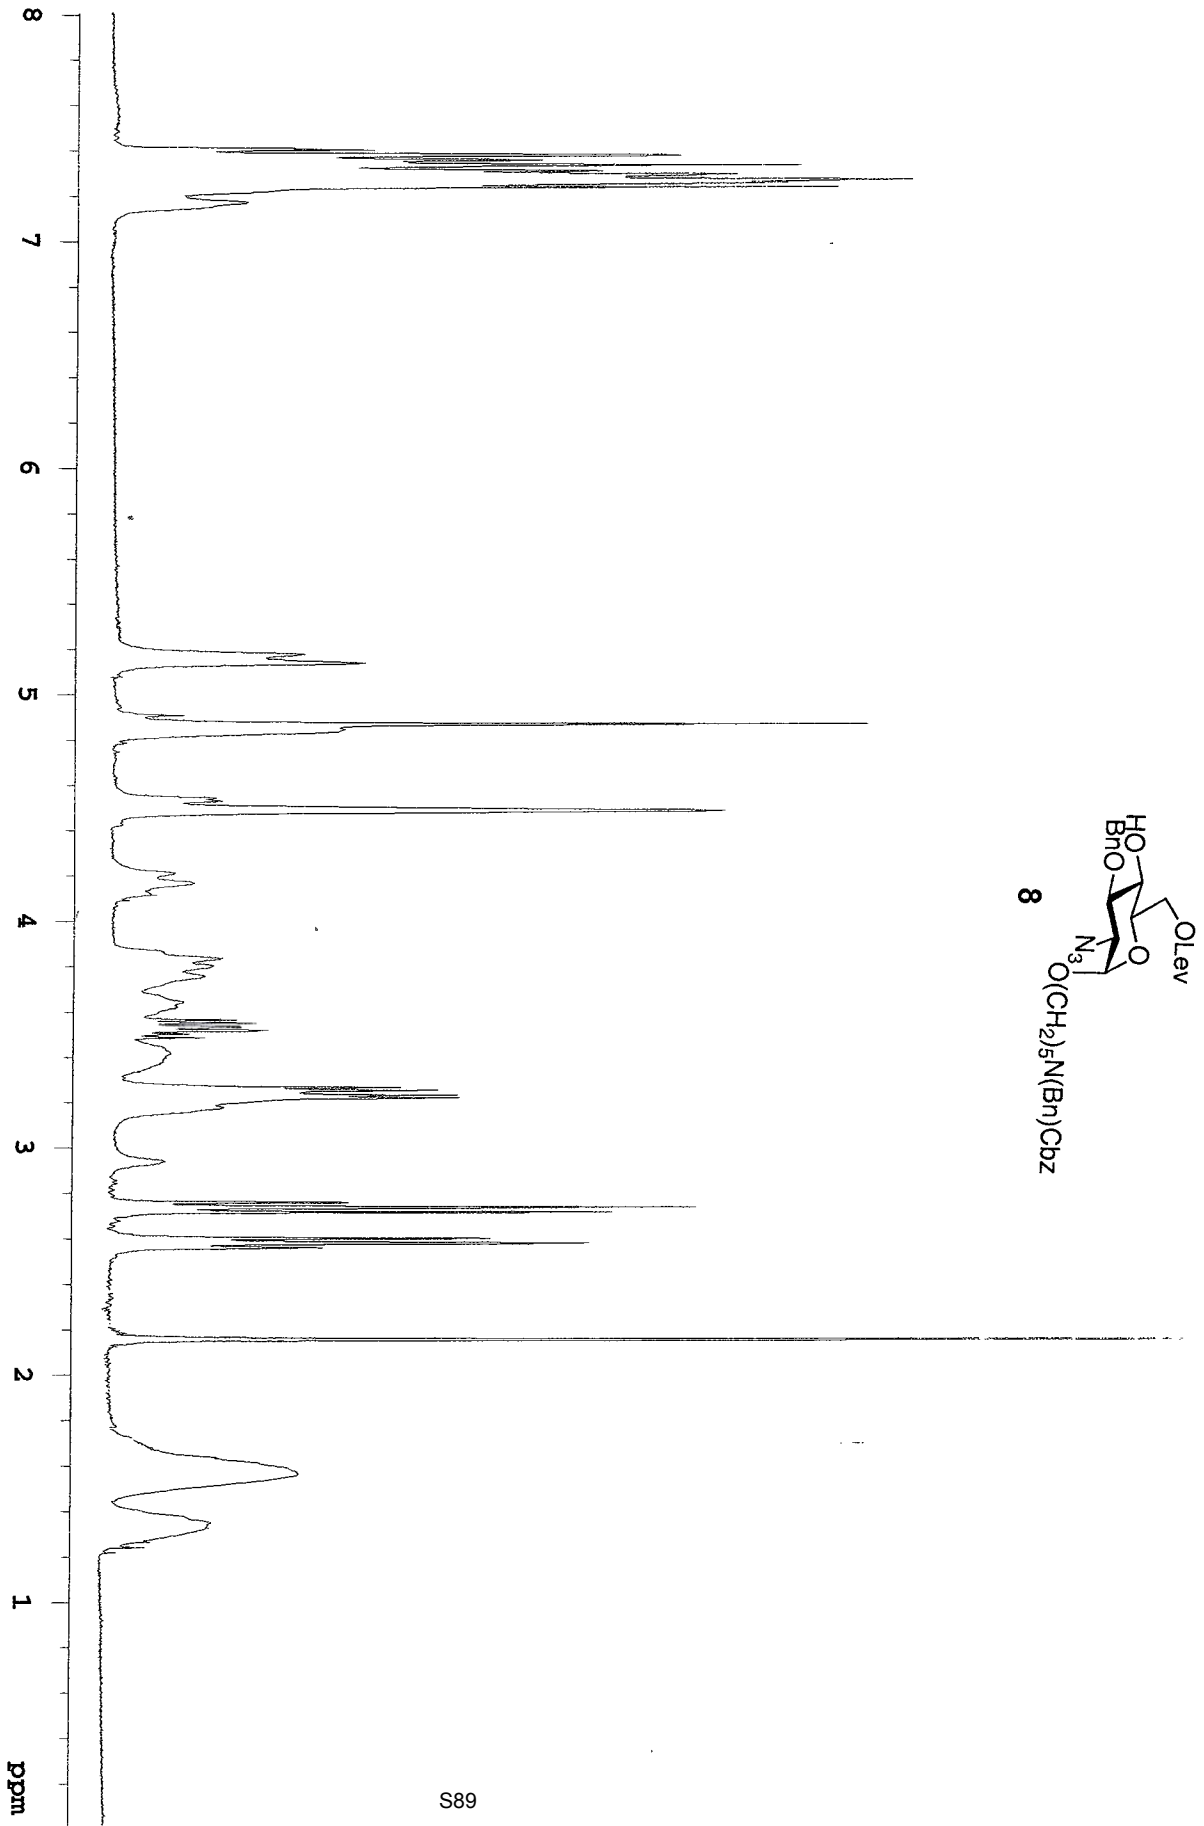

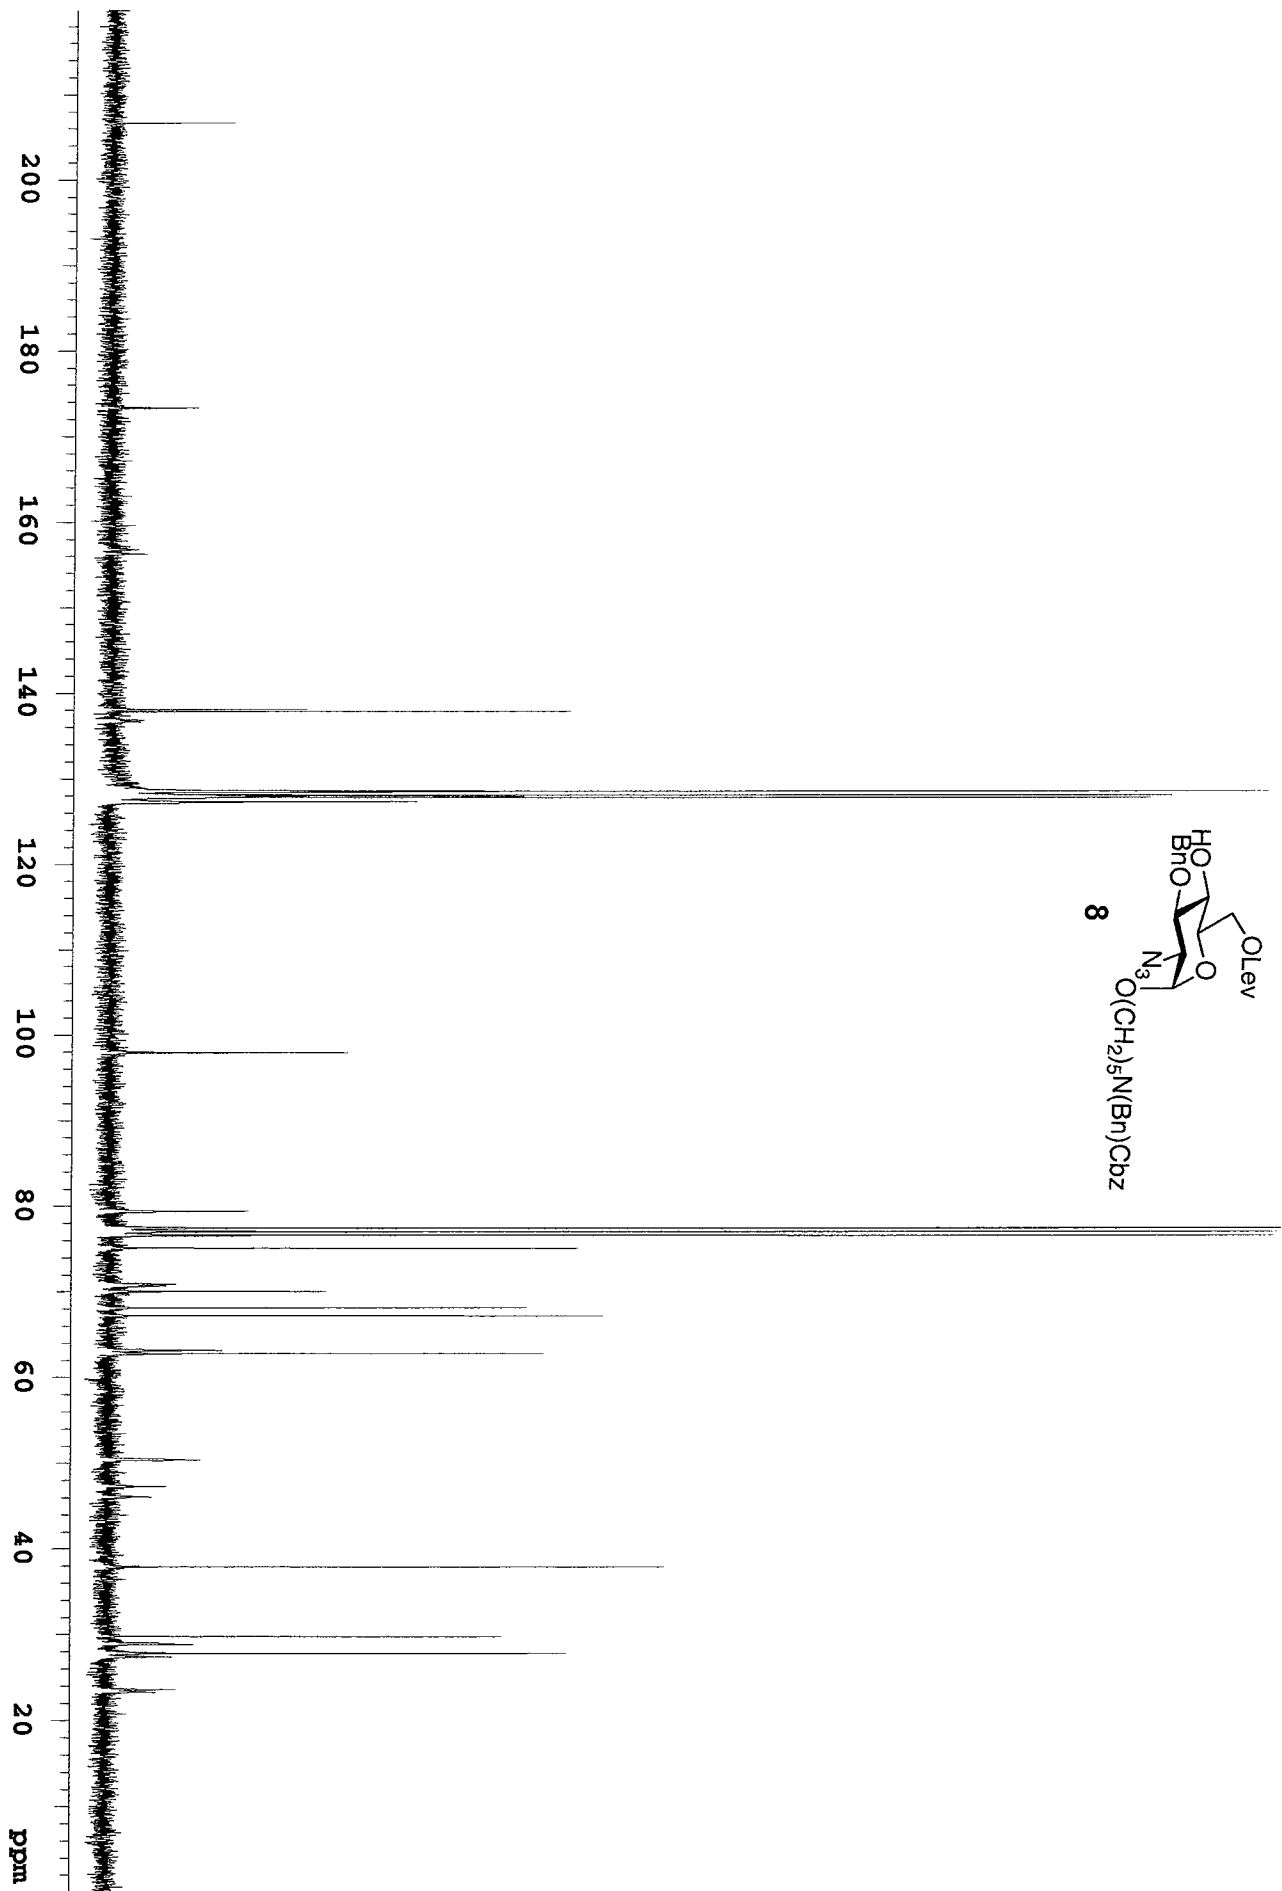

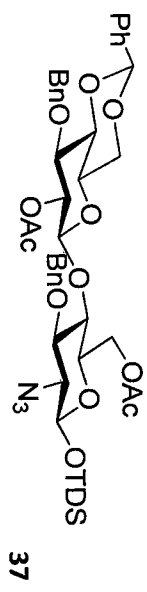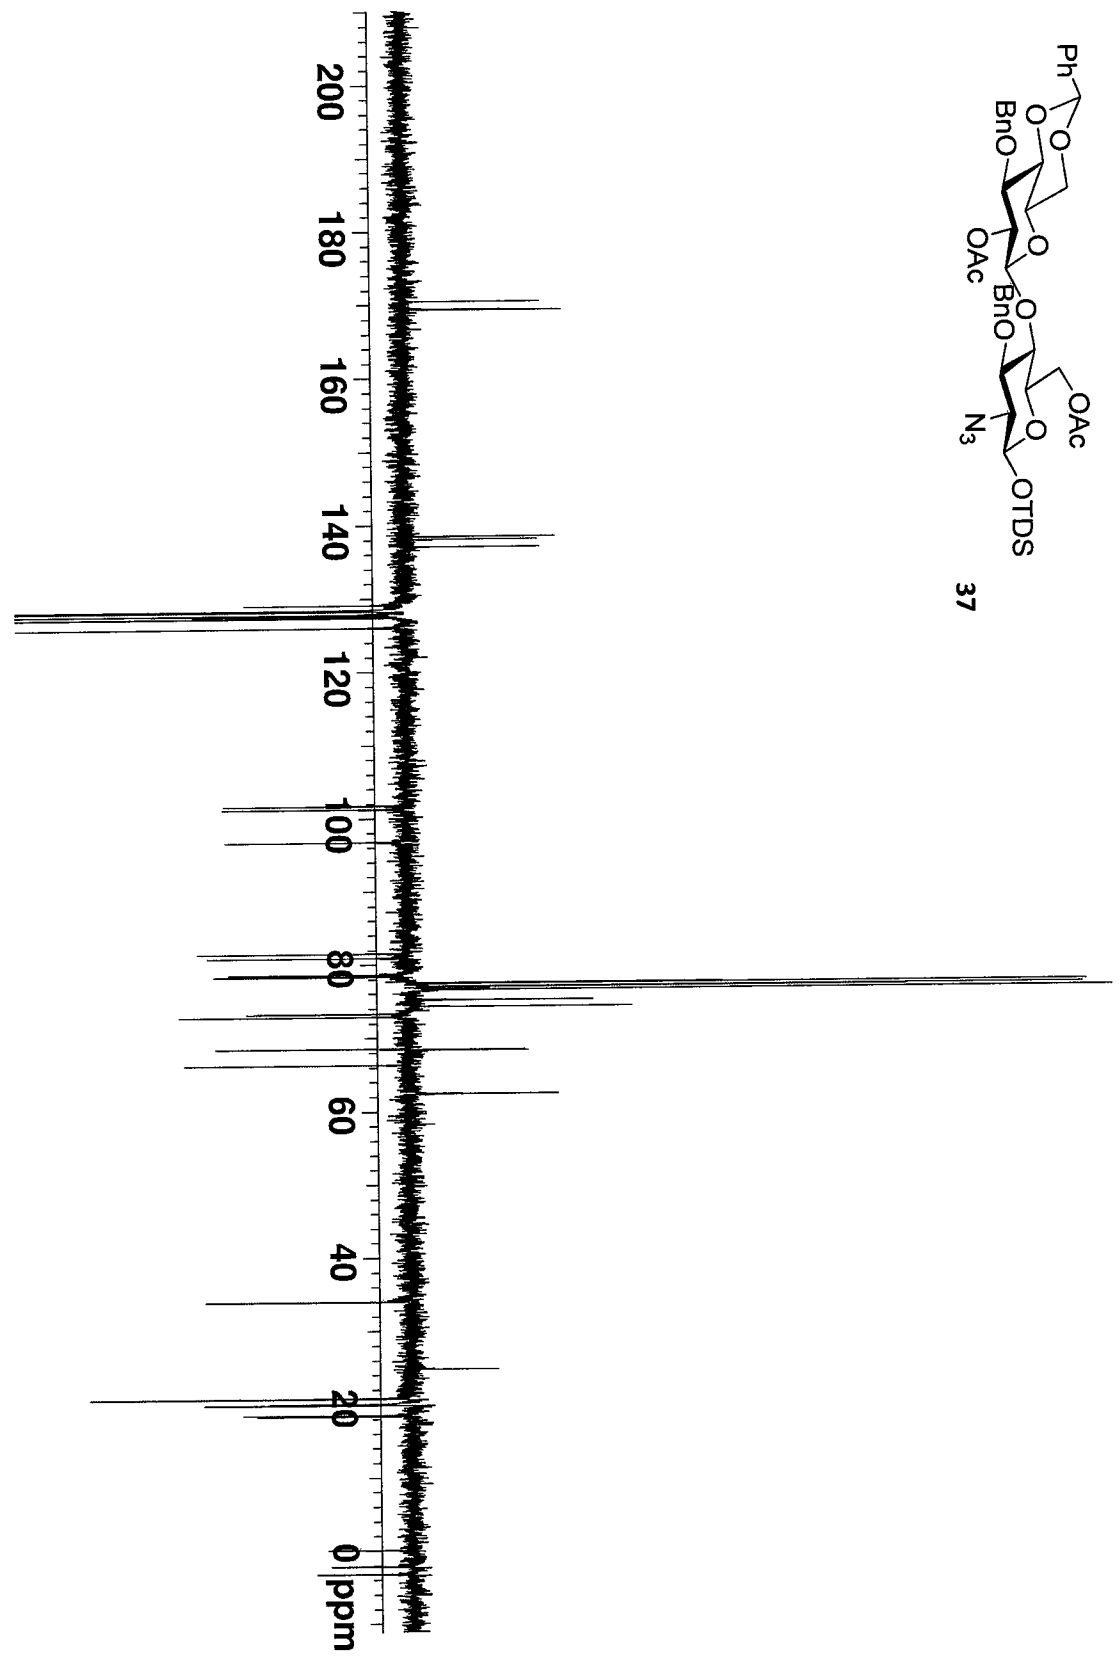

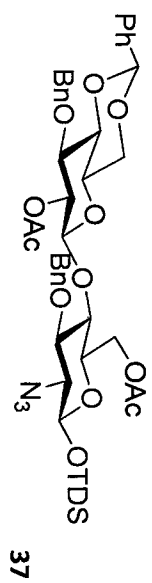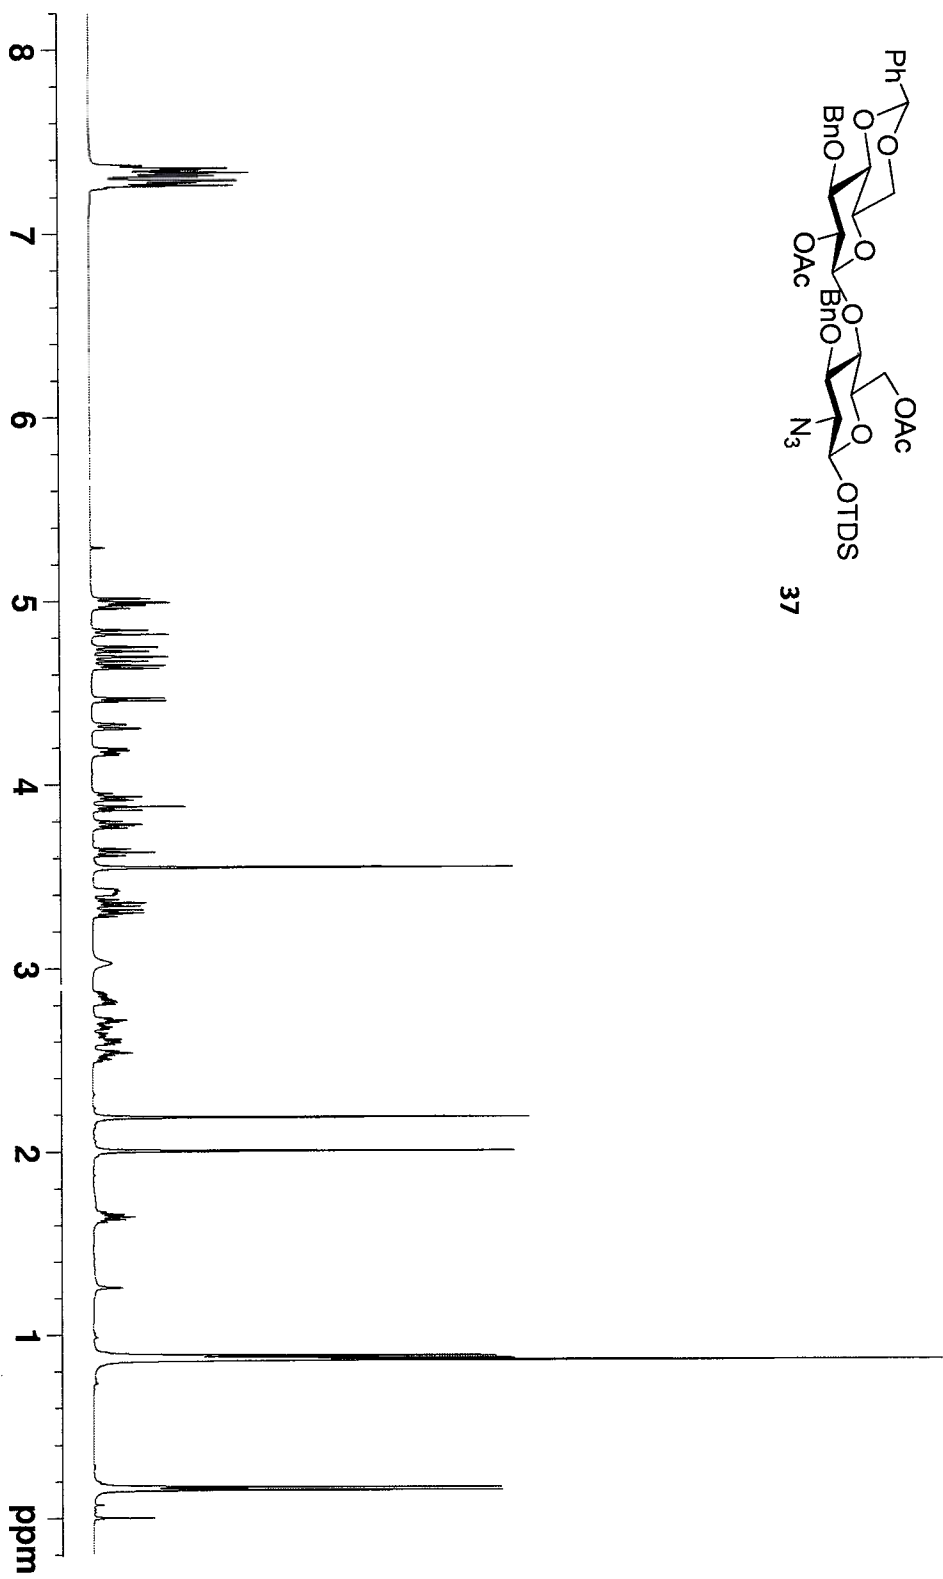

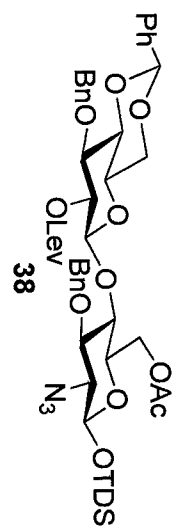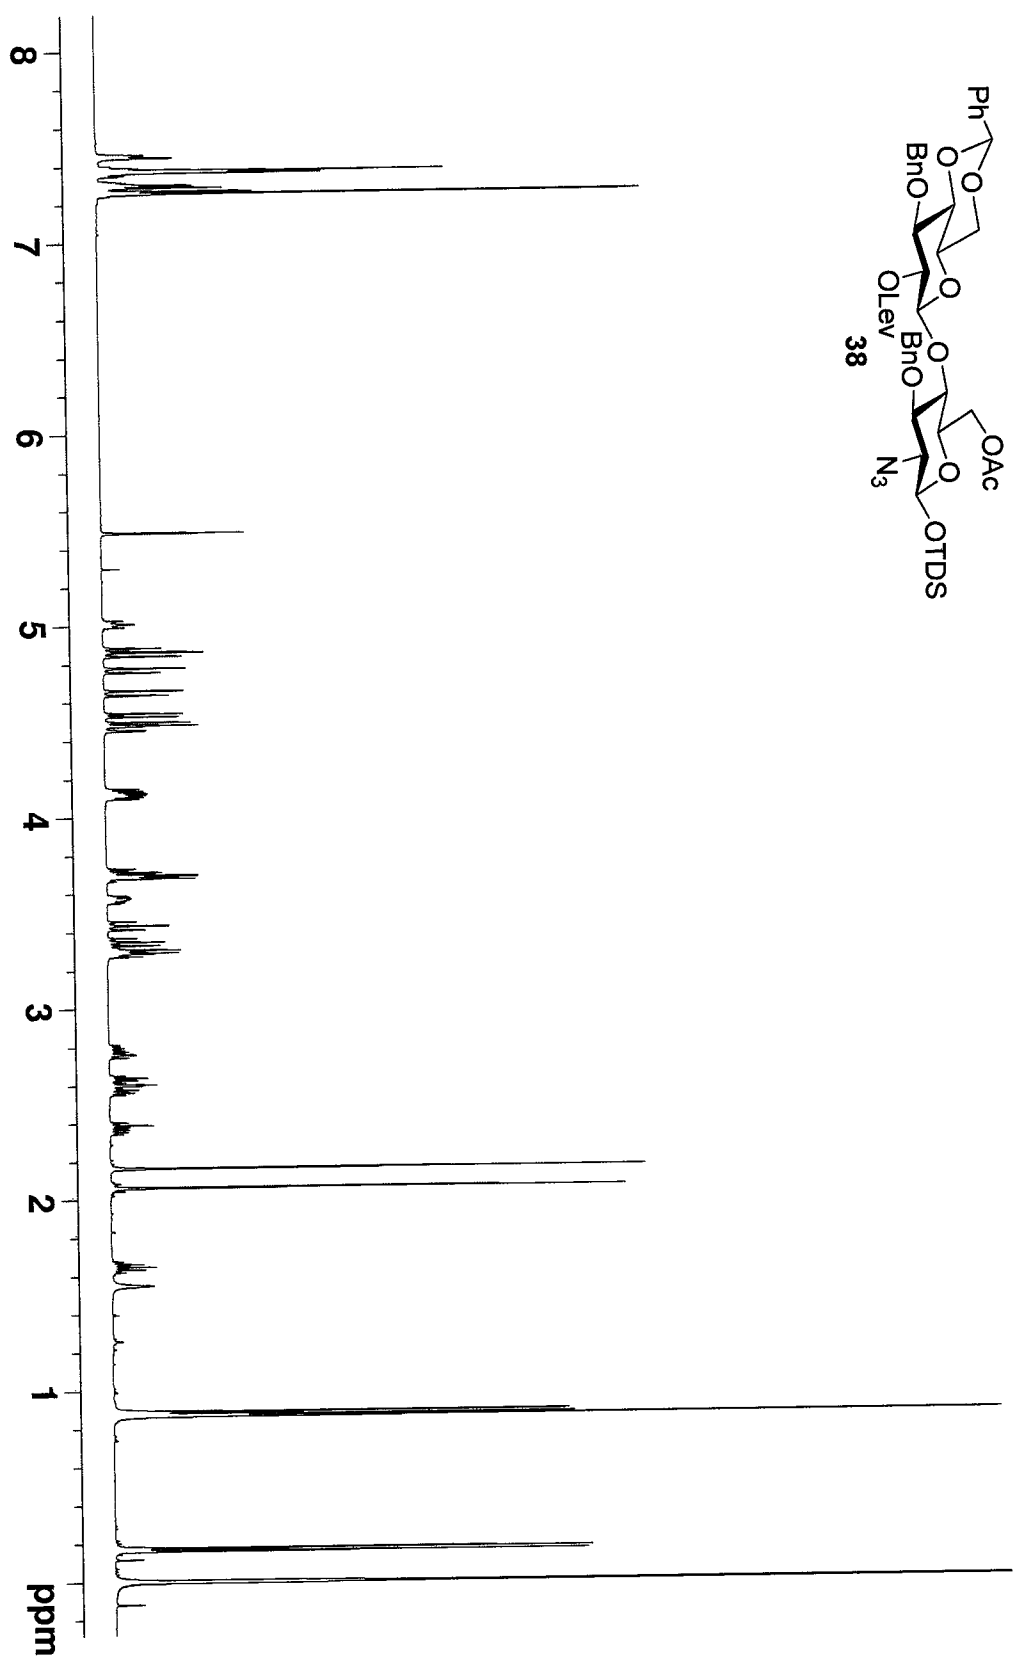

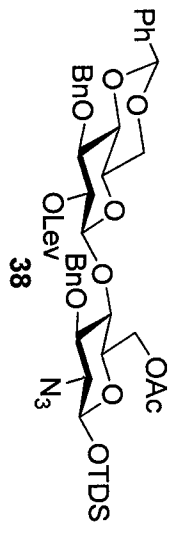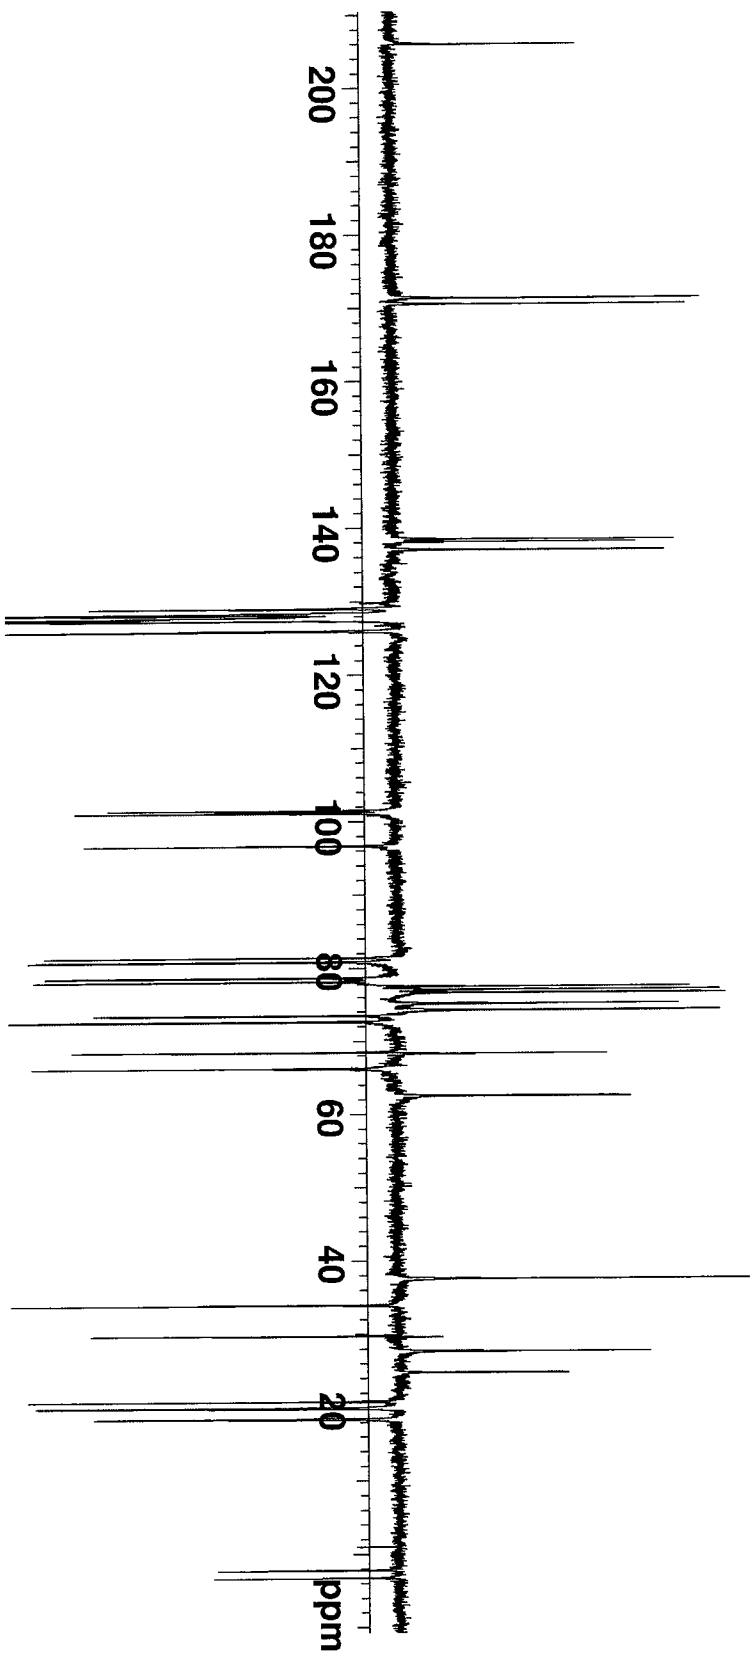

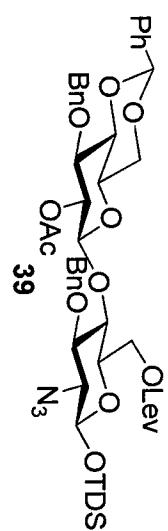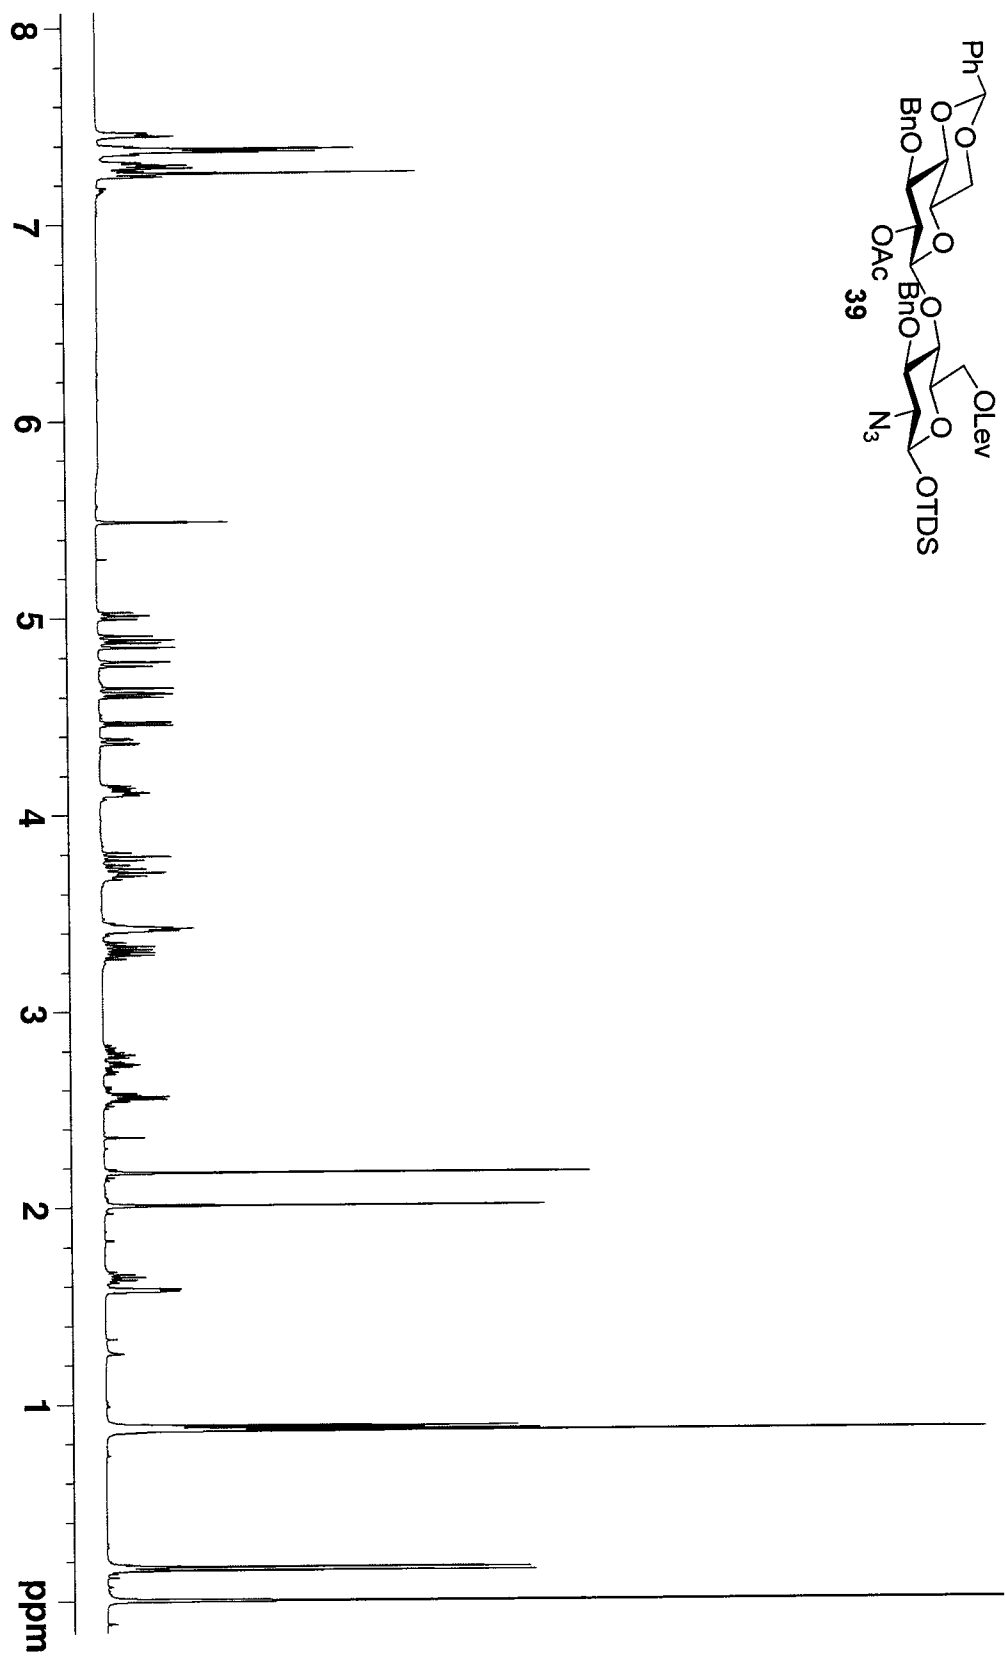

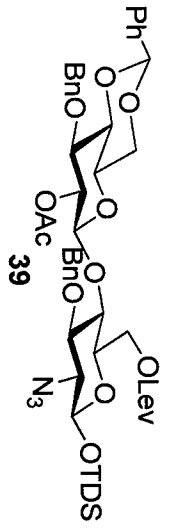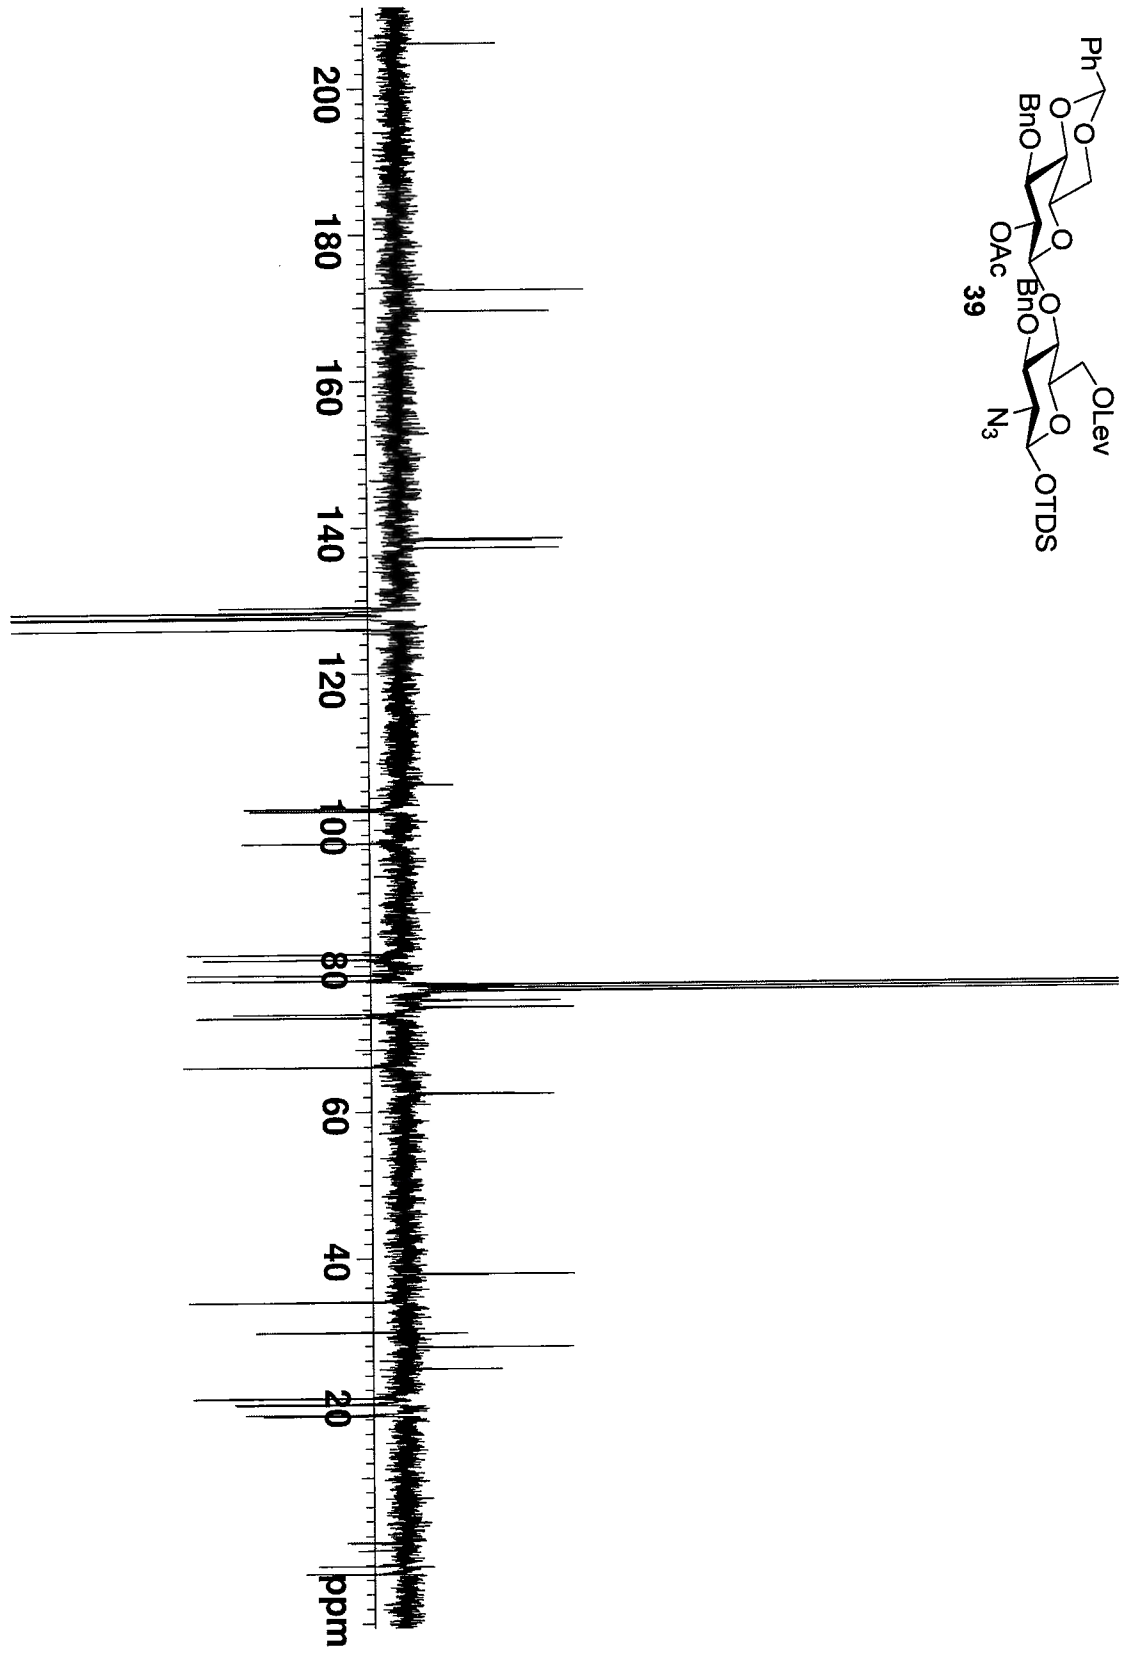



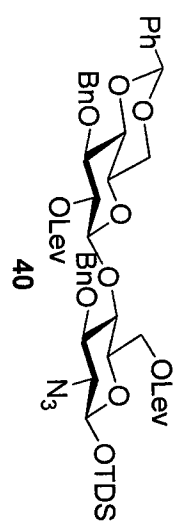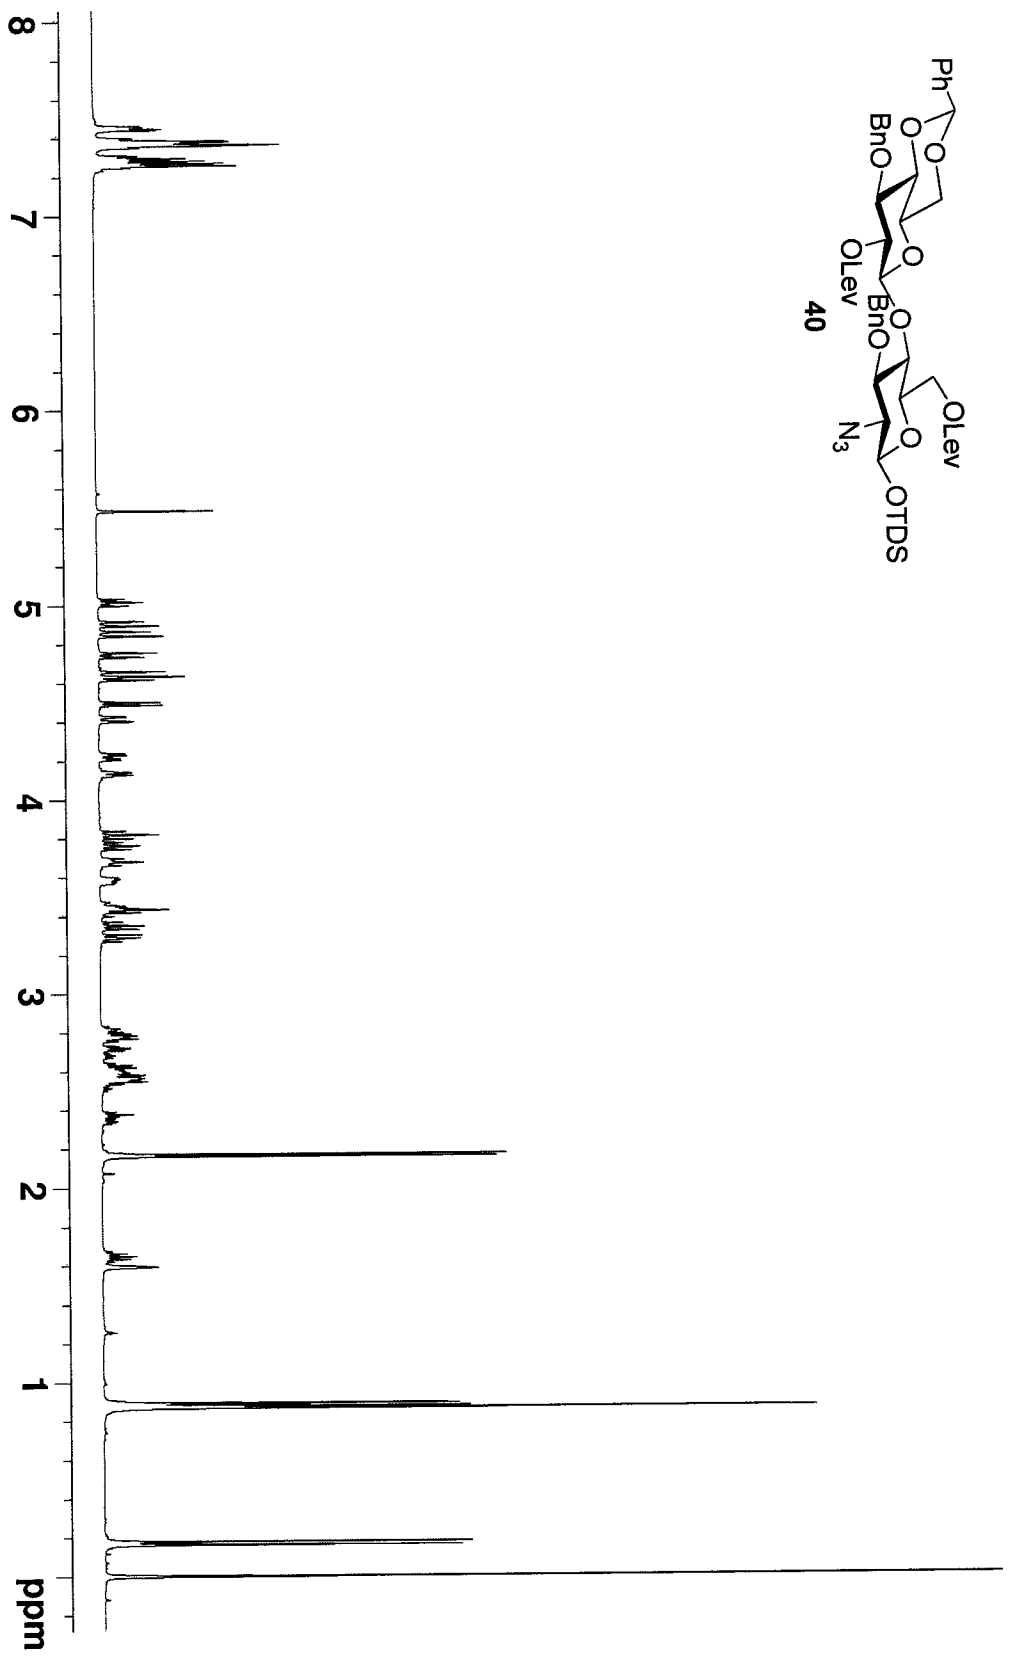

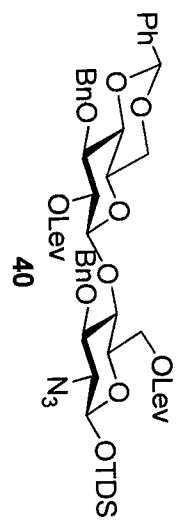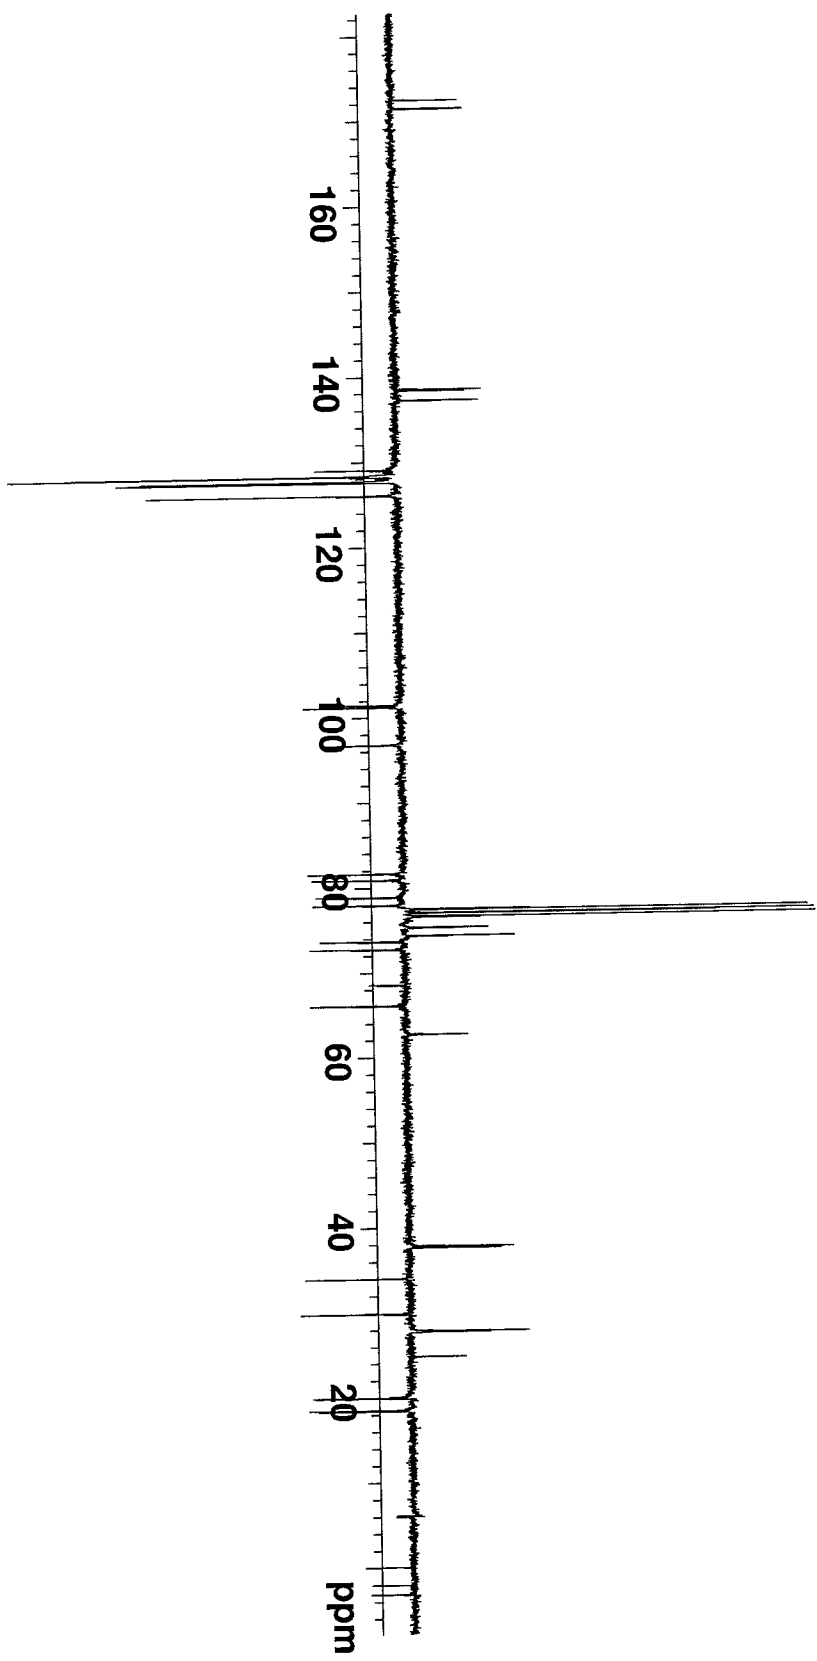

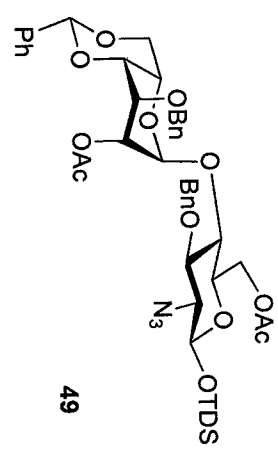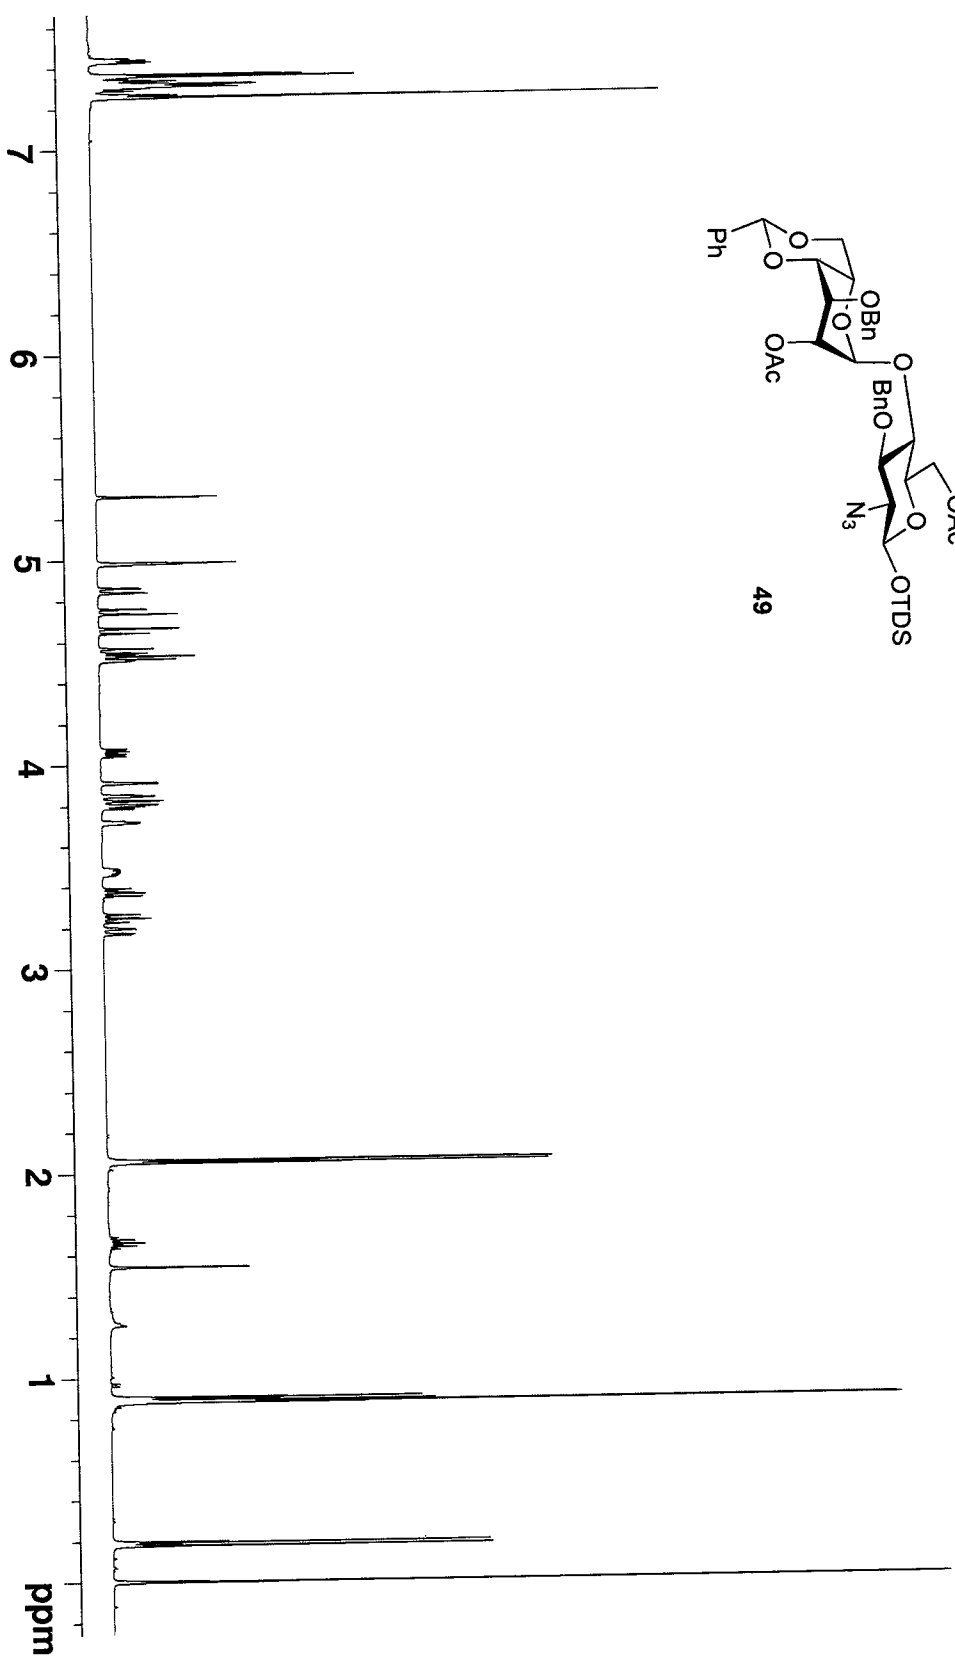

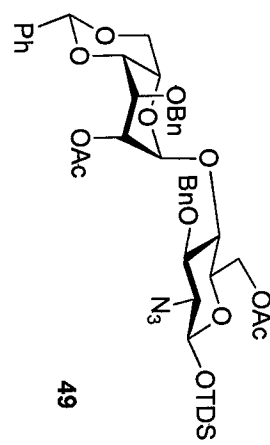

49

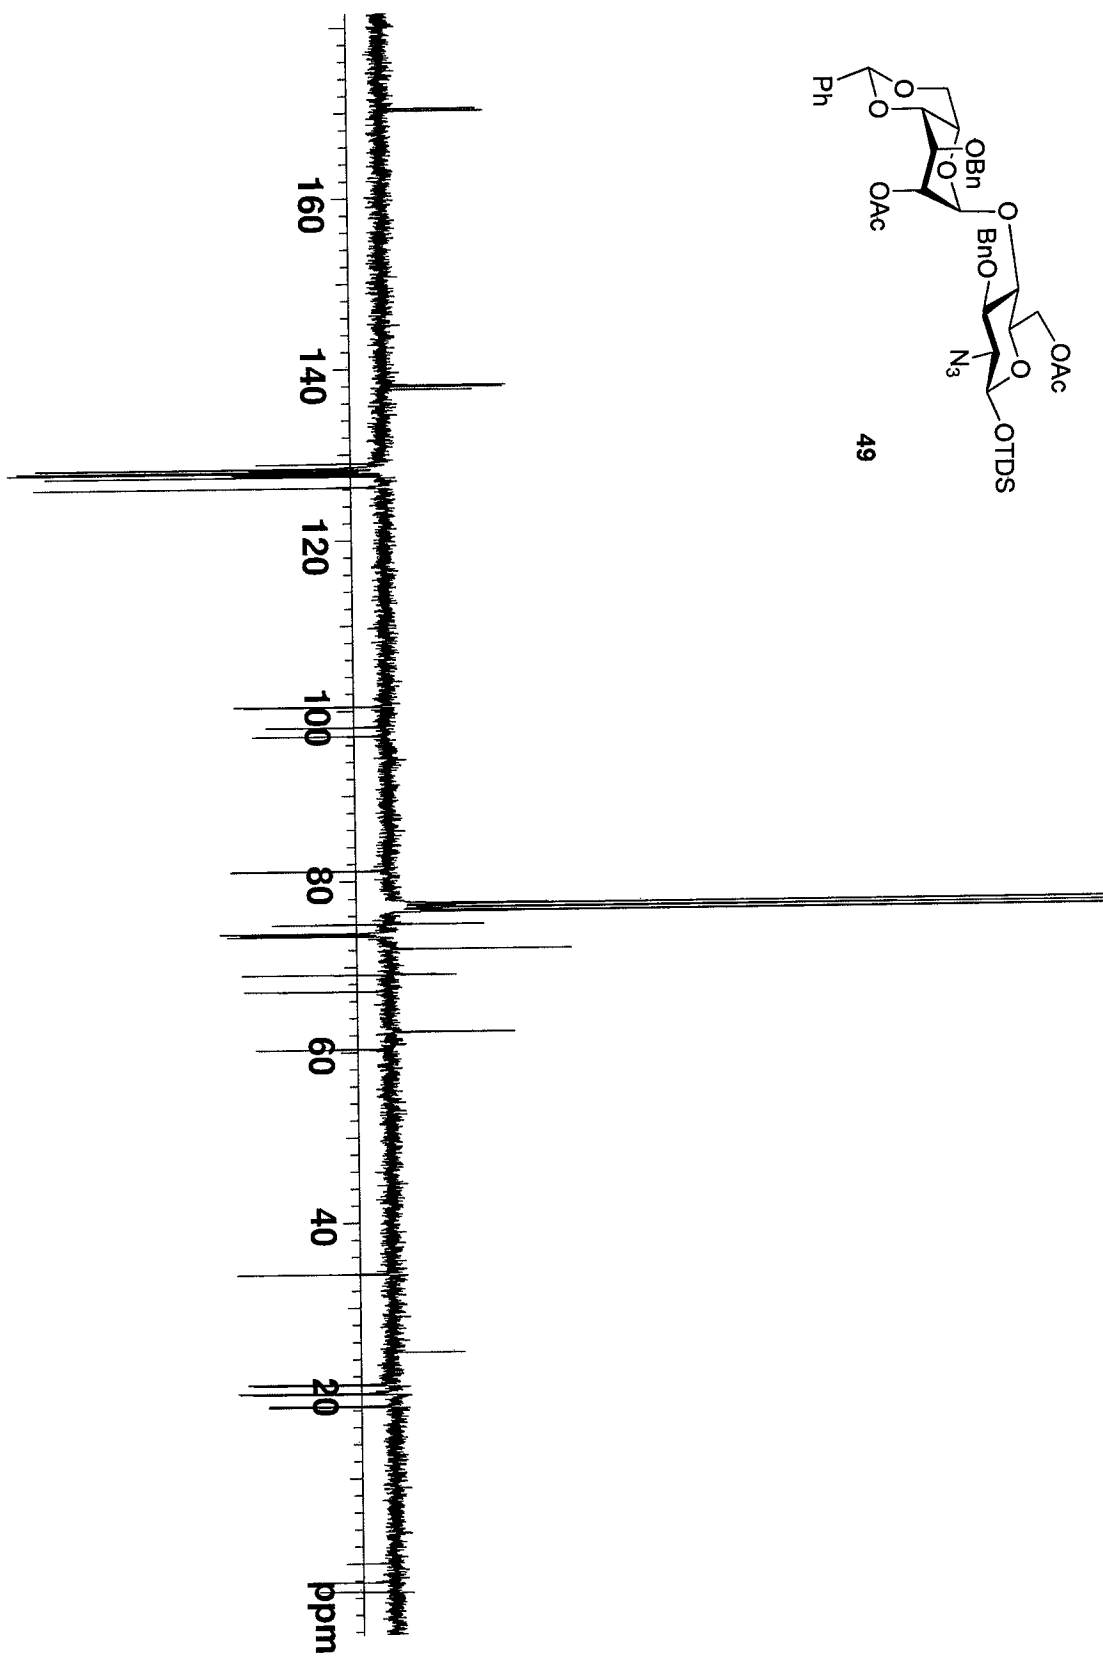

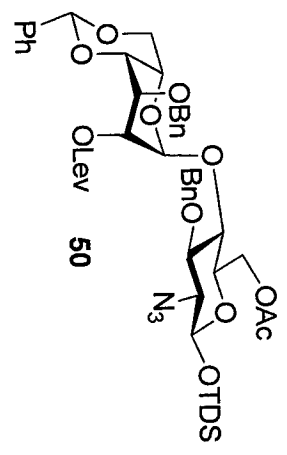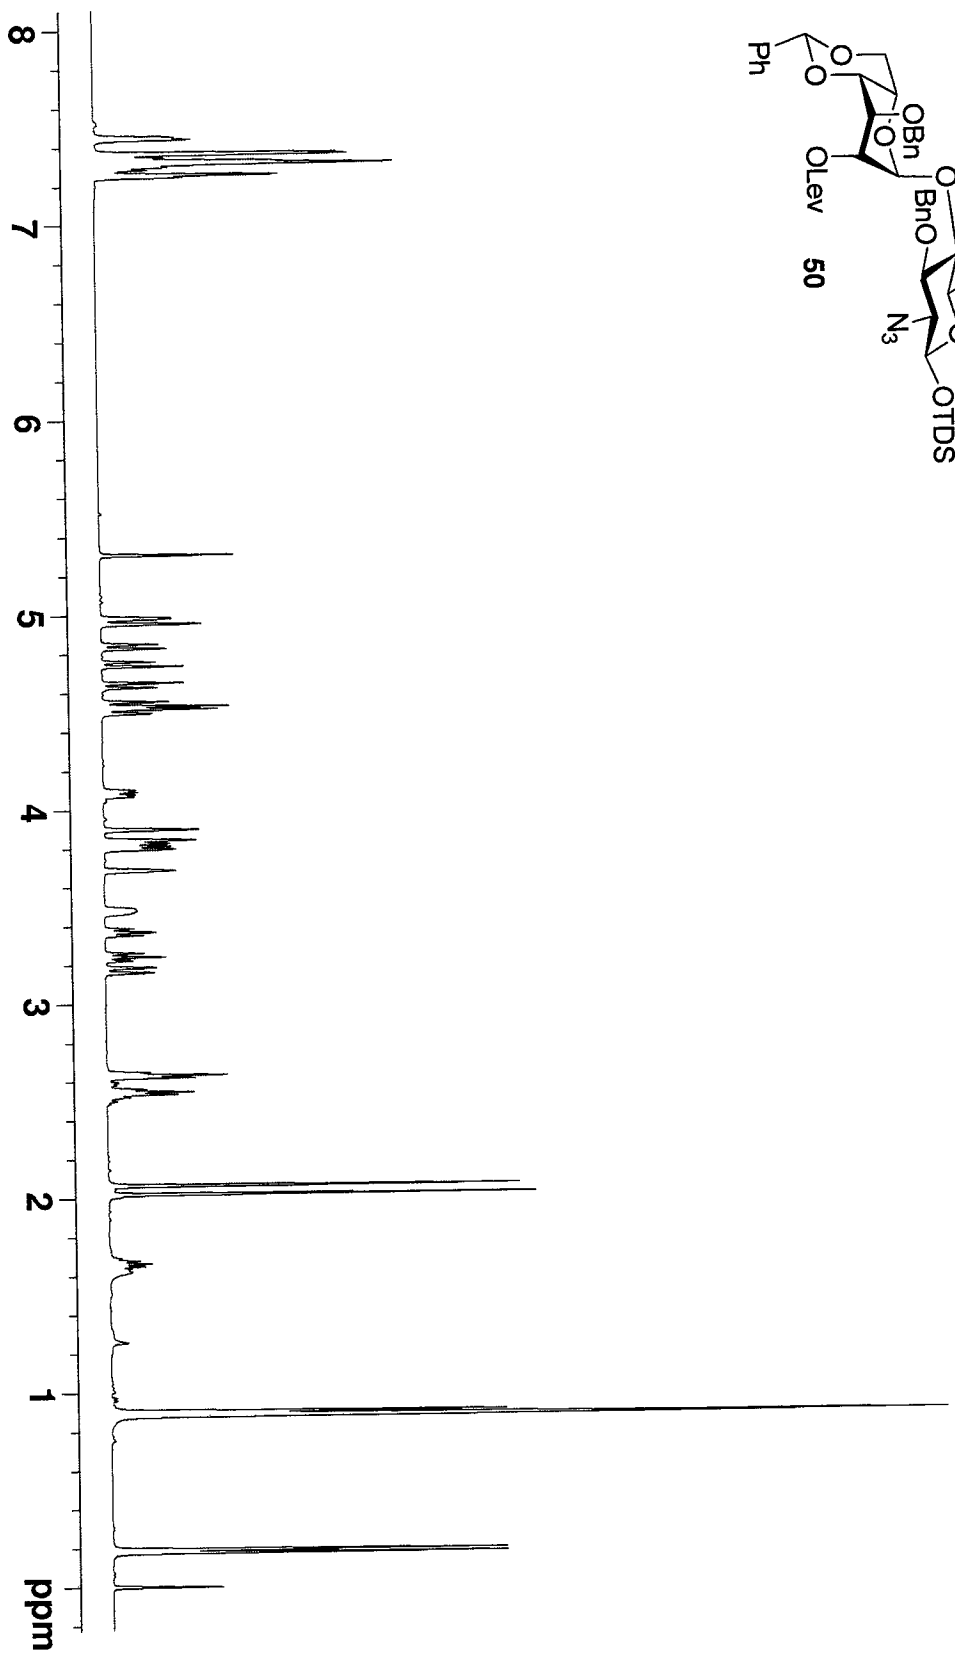

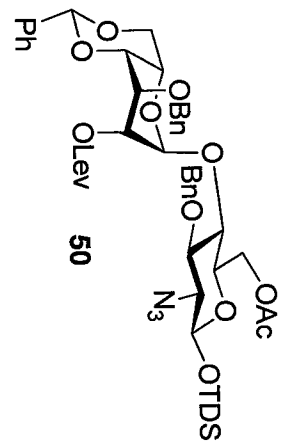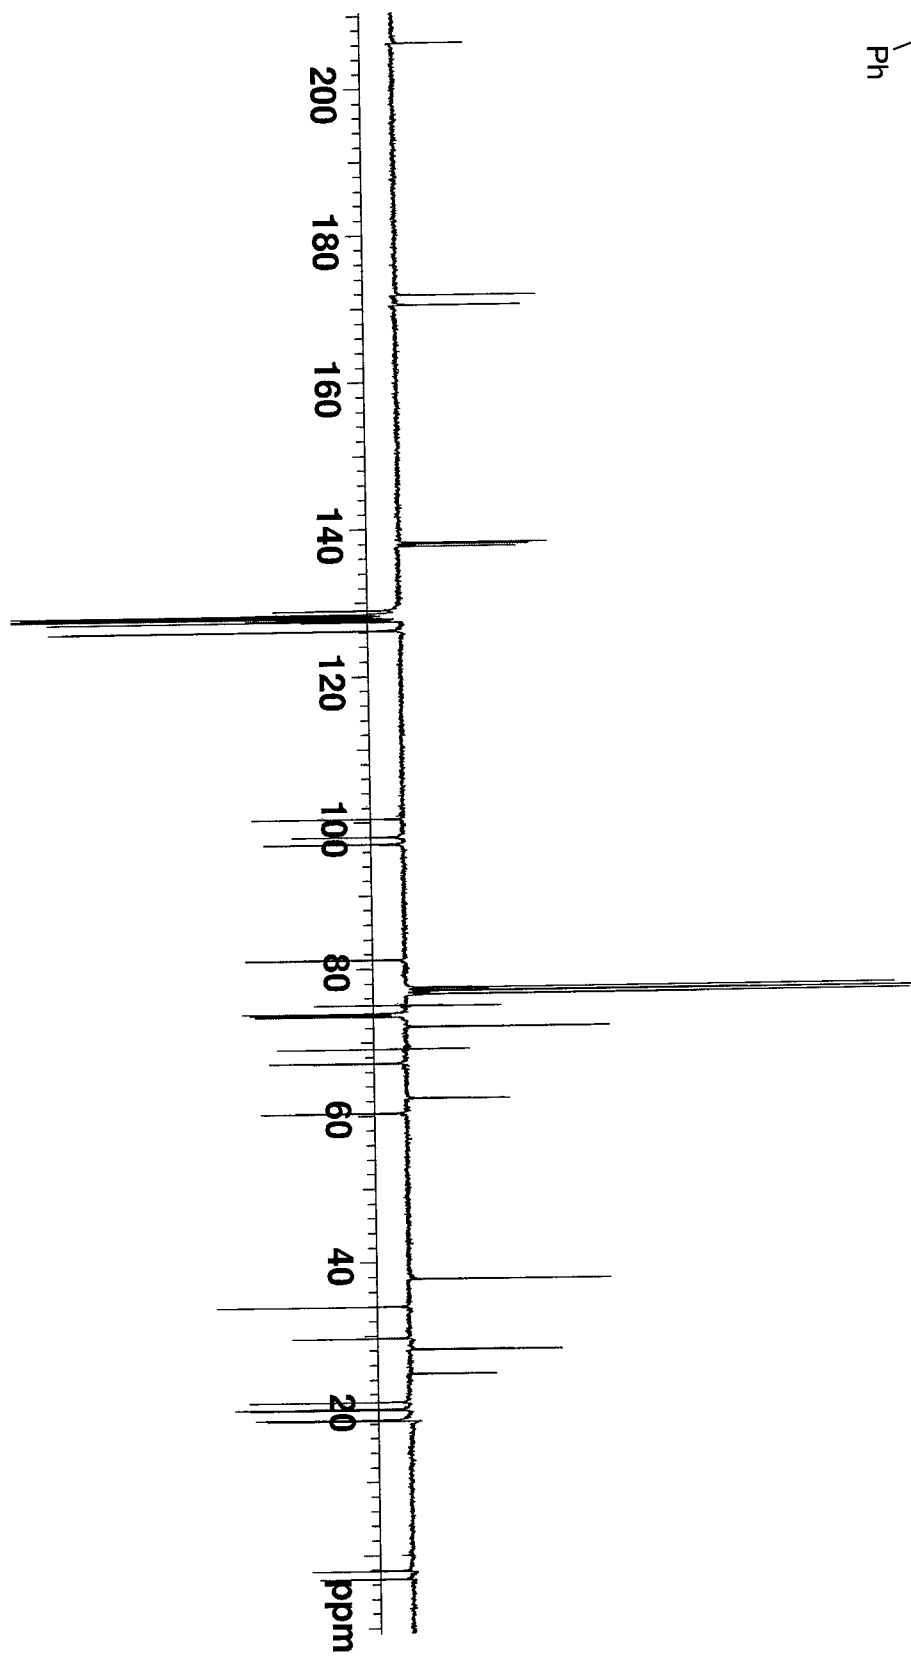

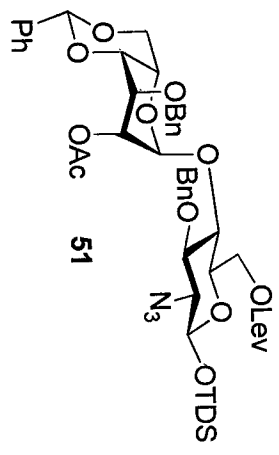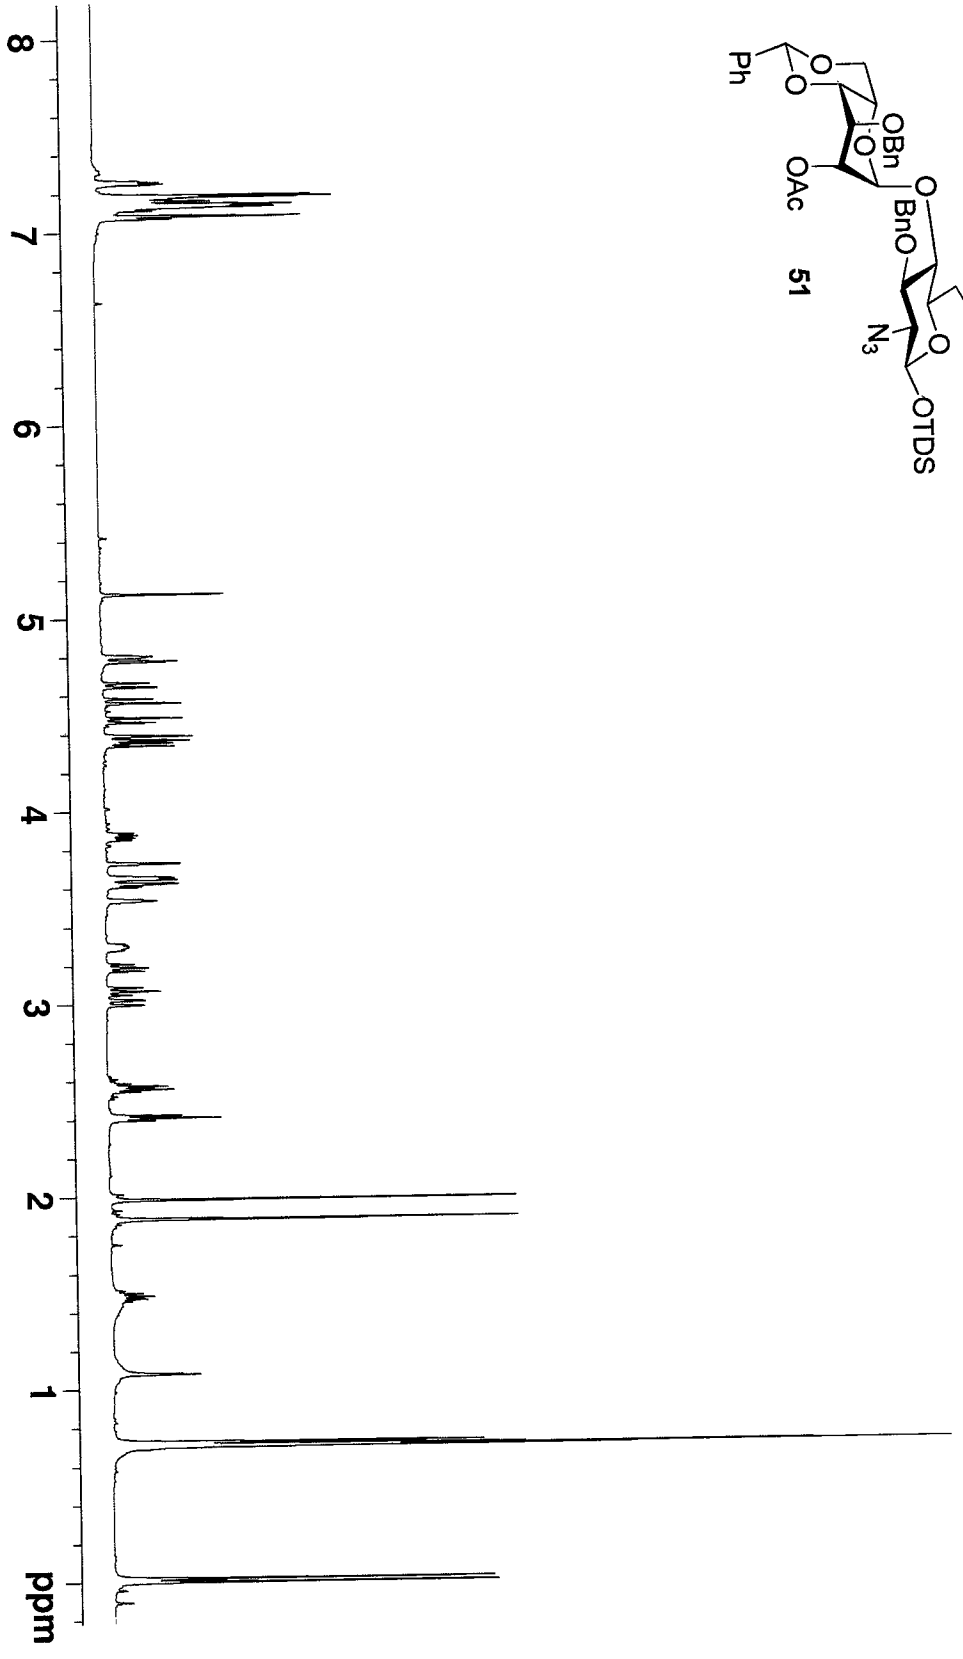

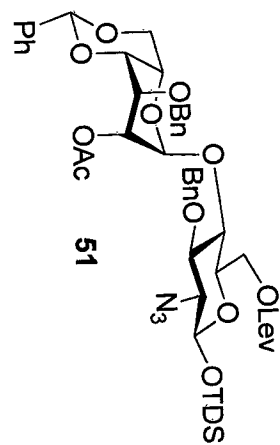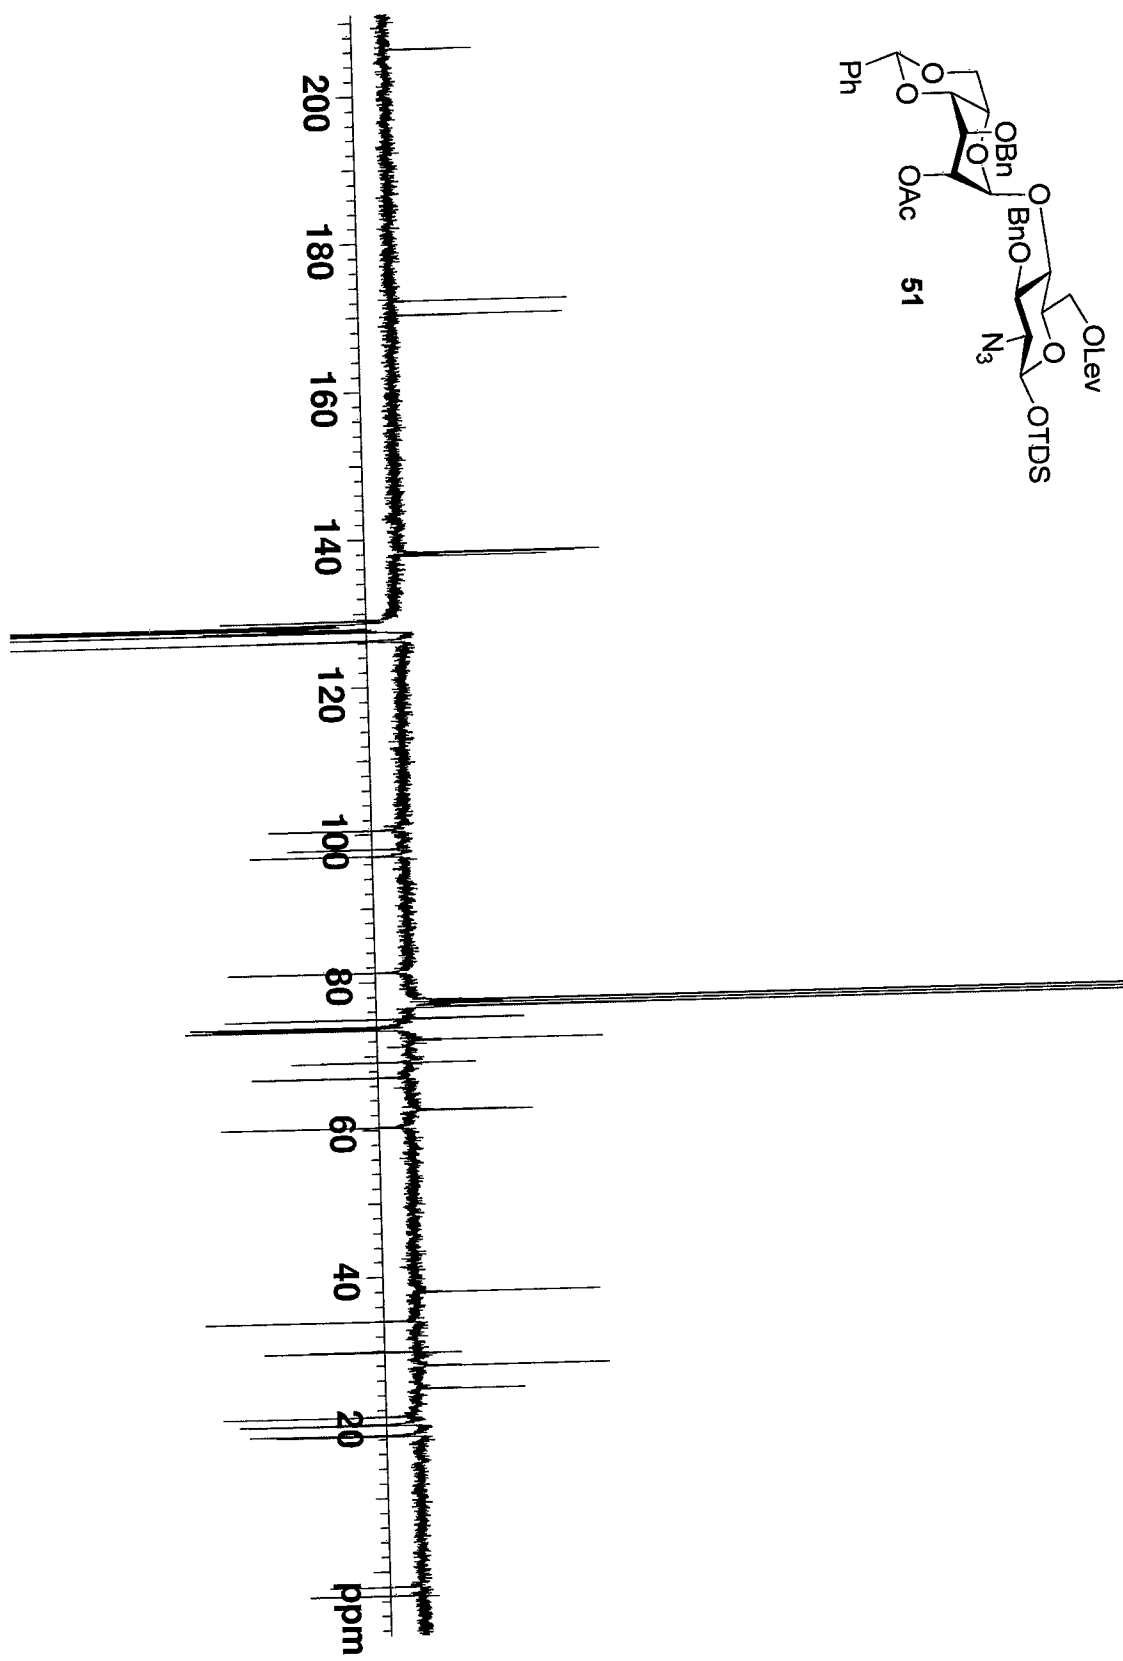



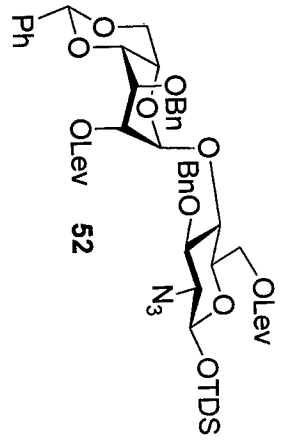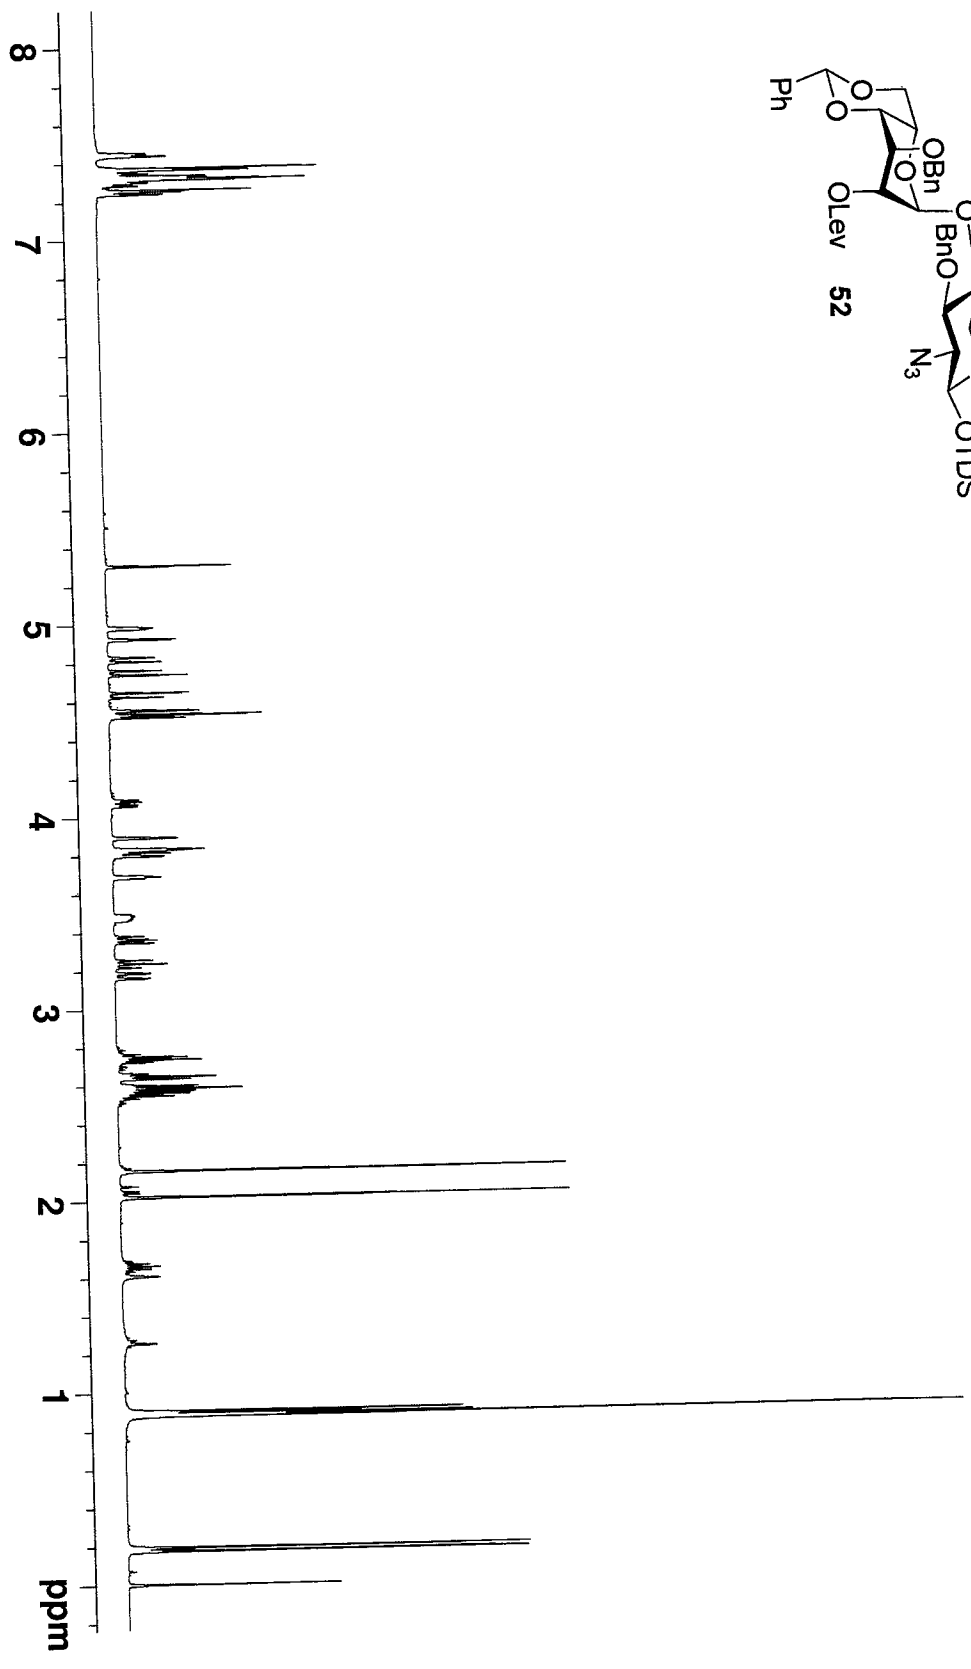

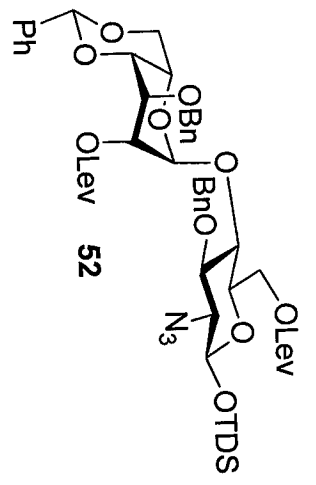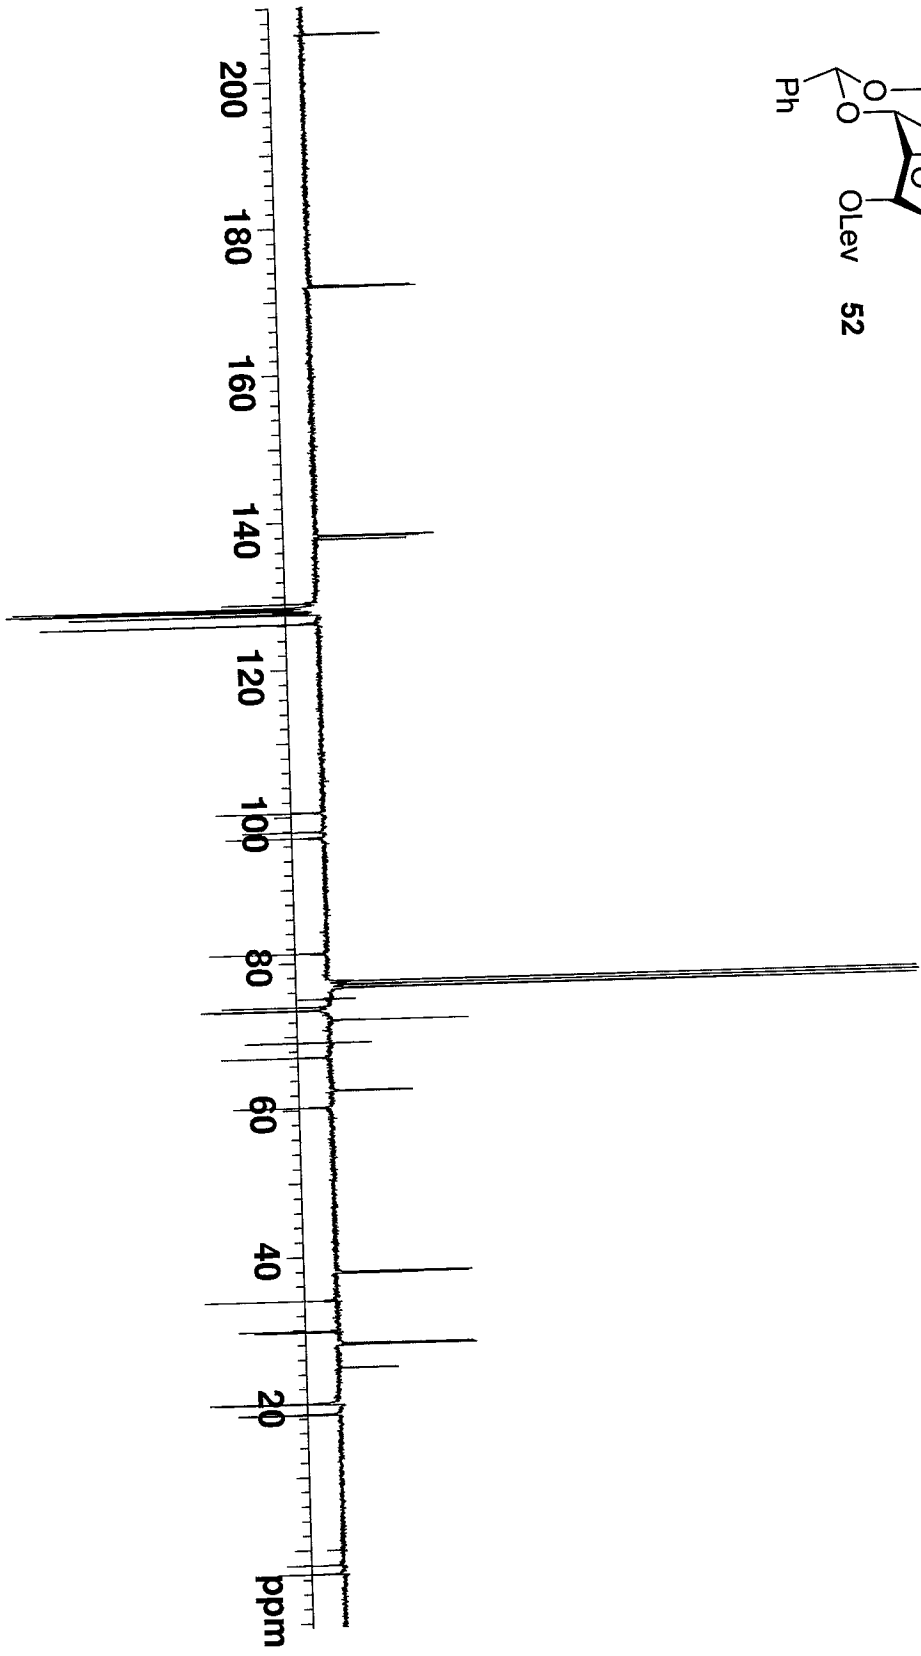

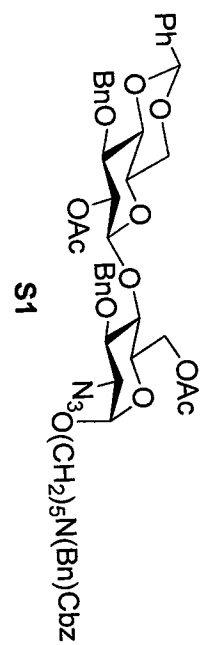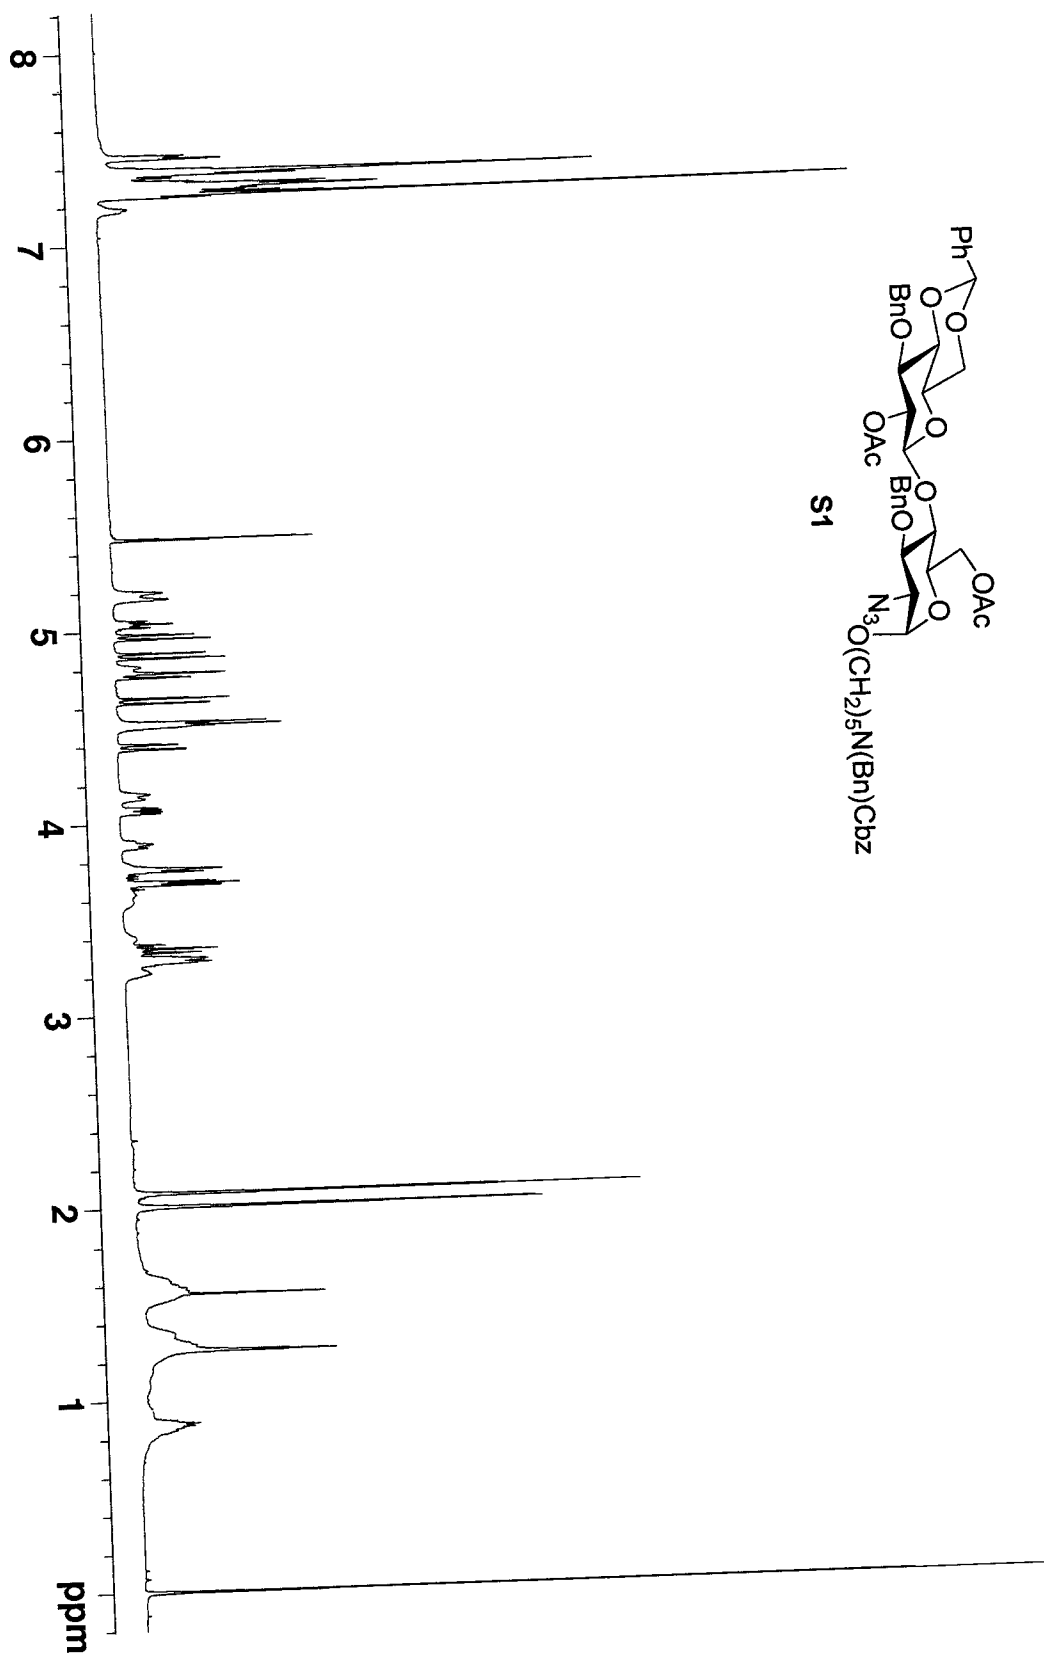

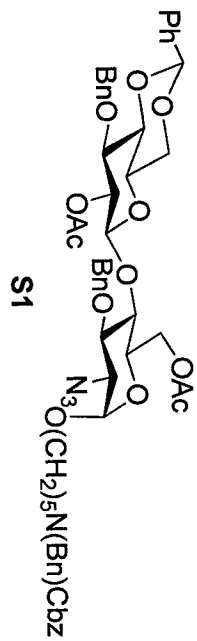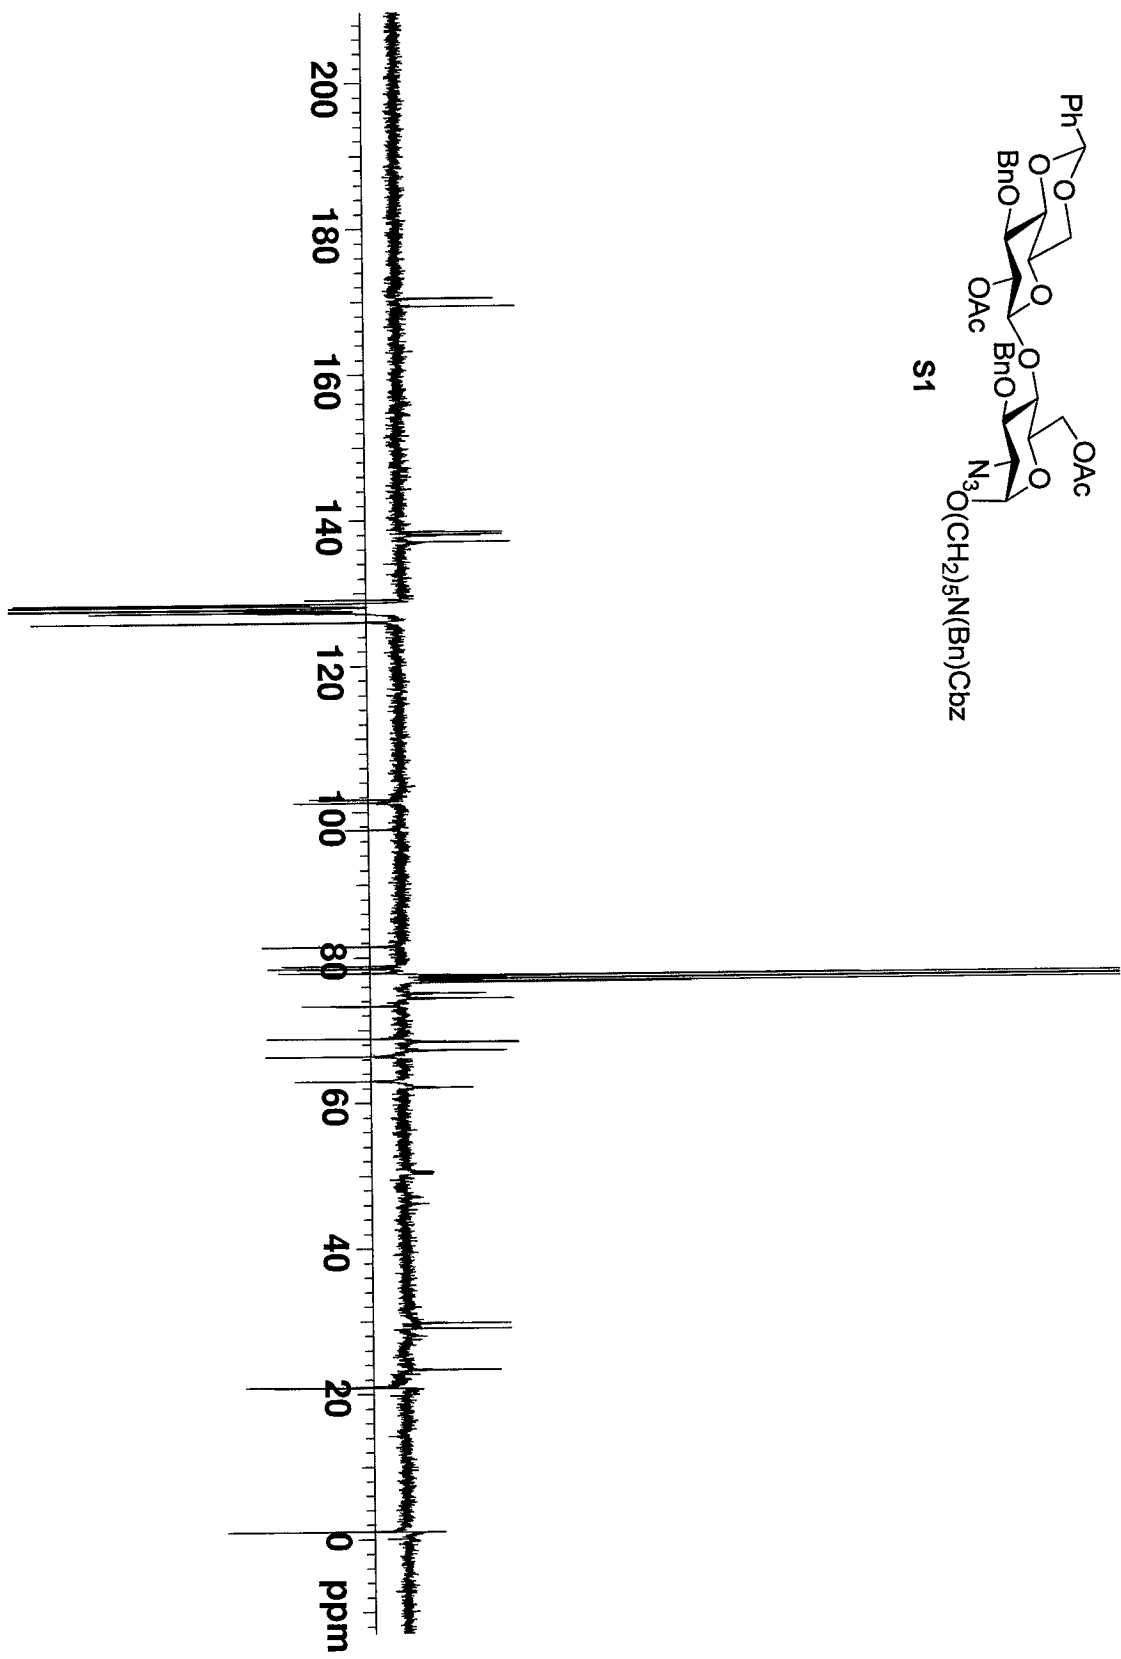

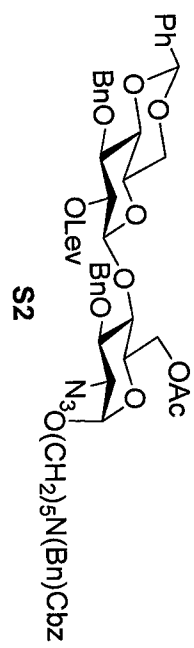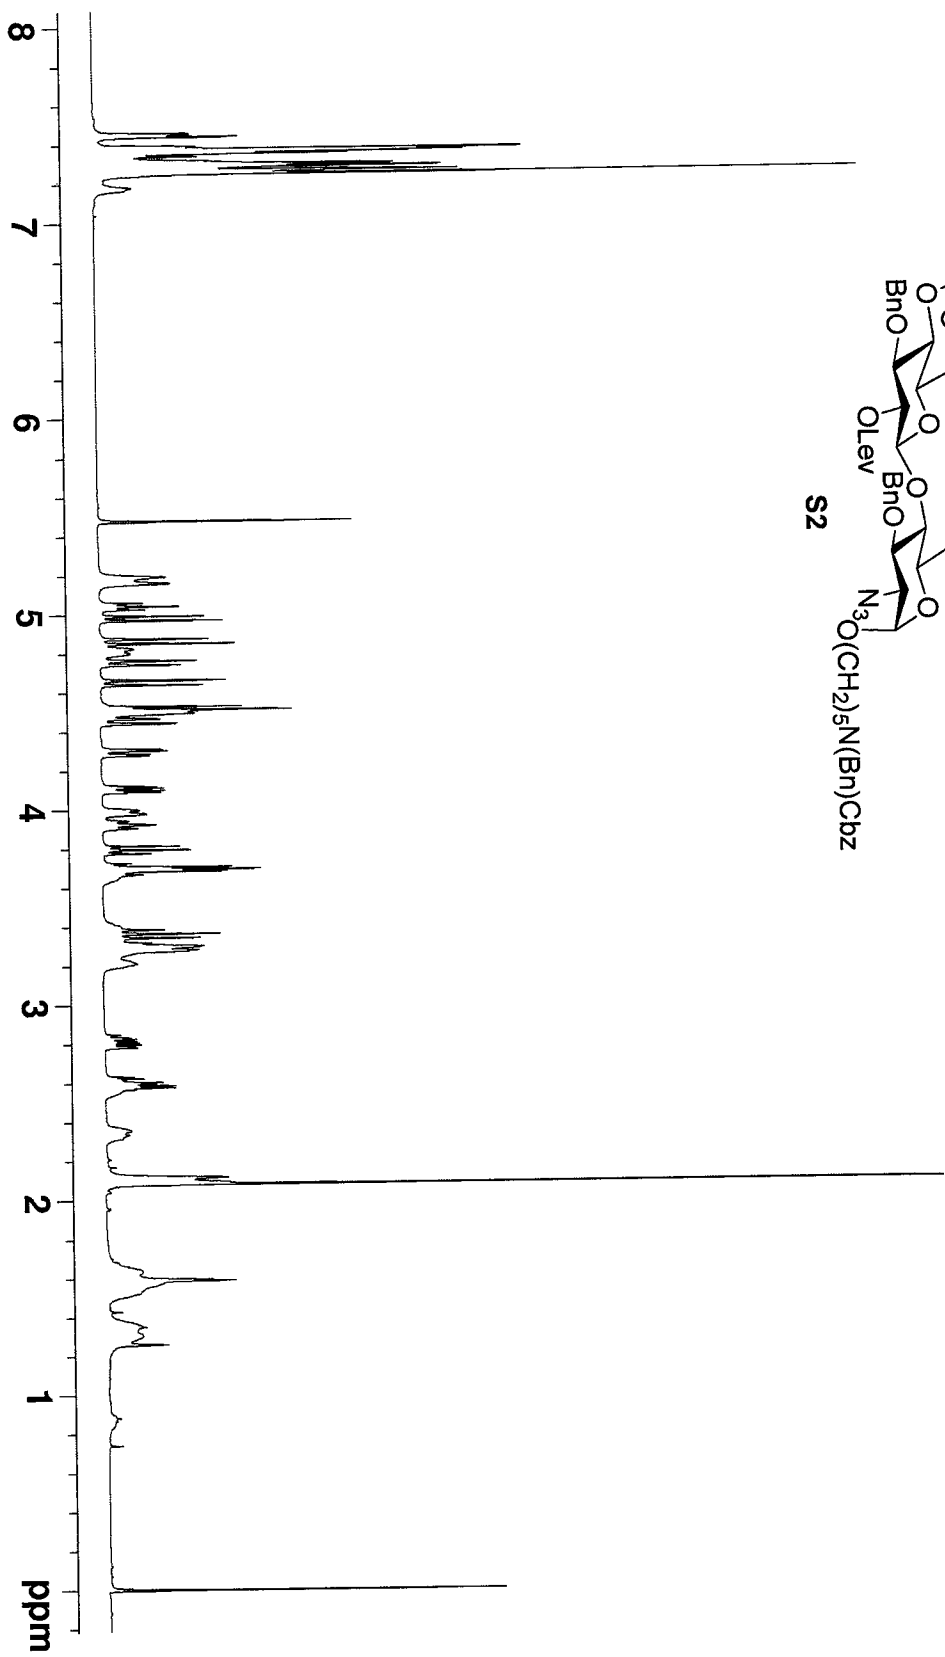

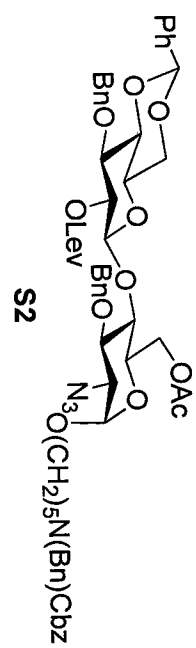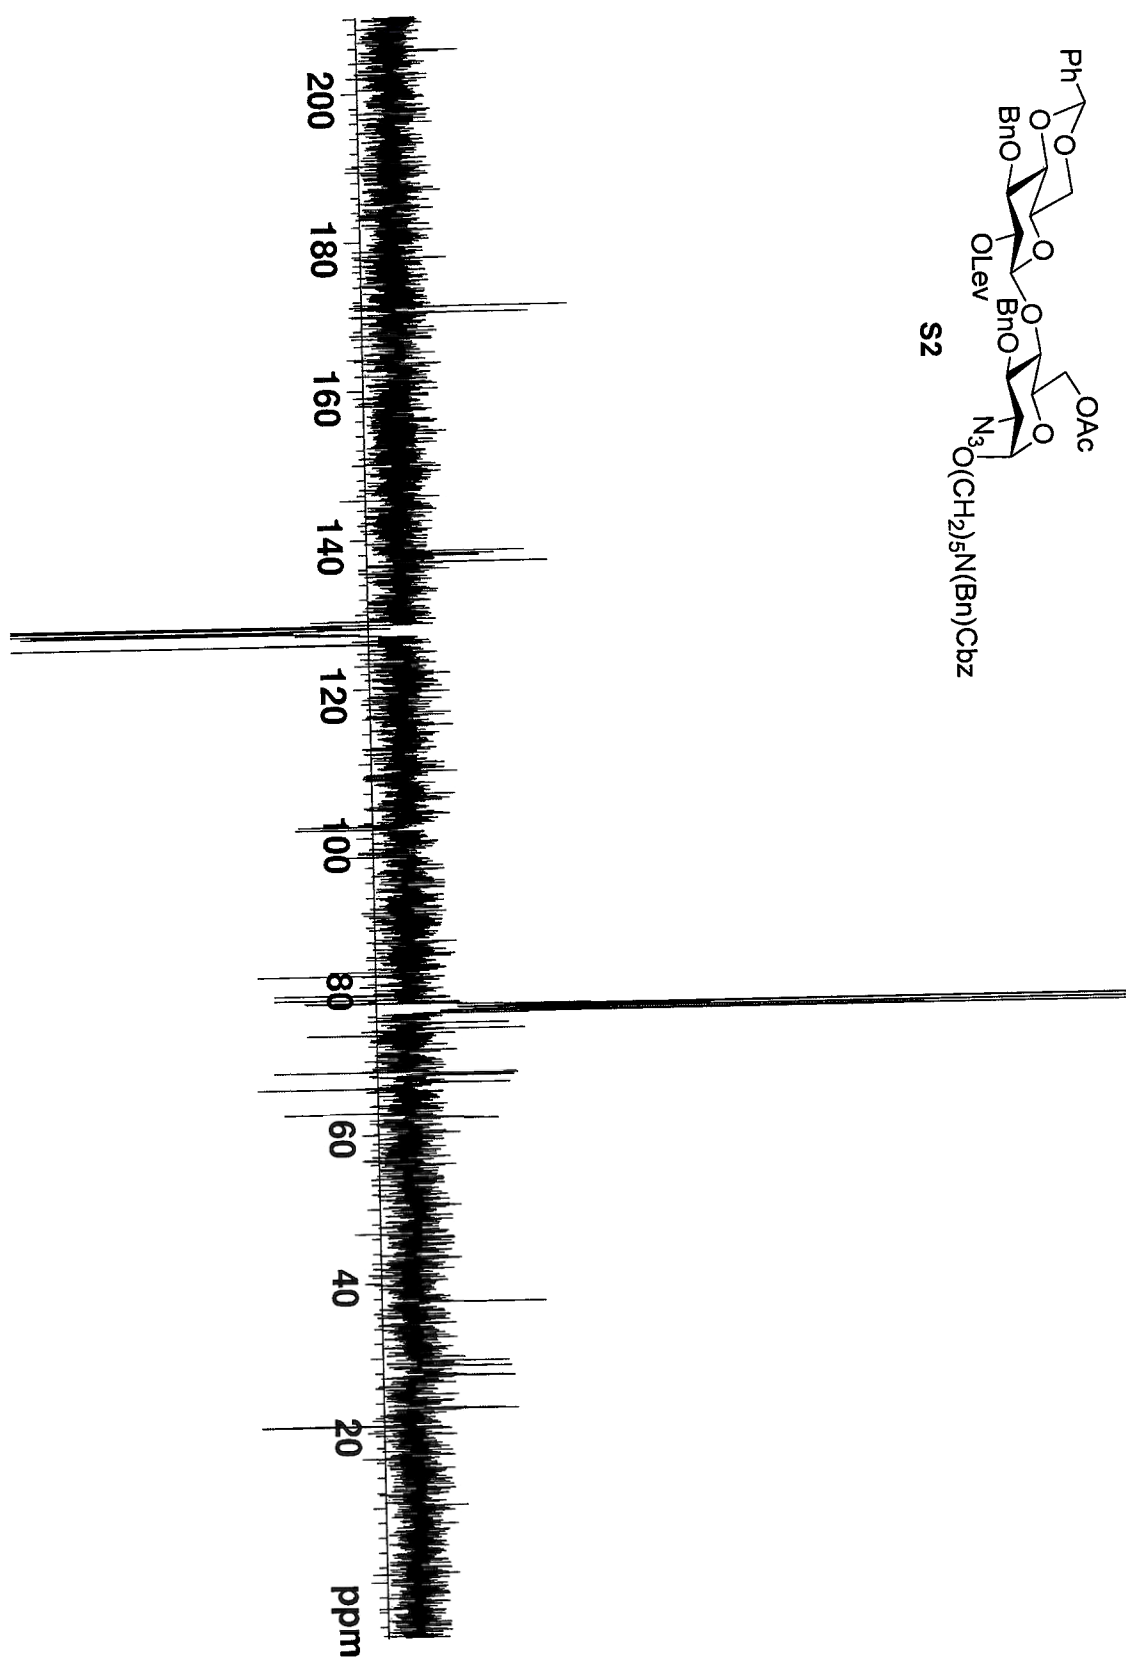

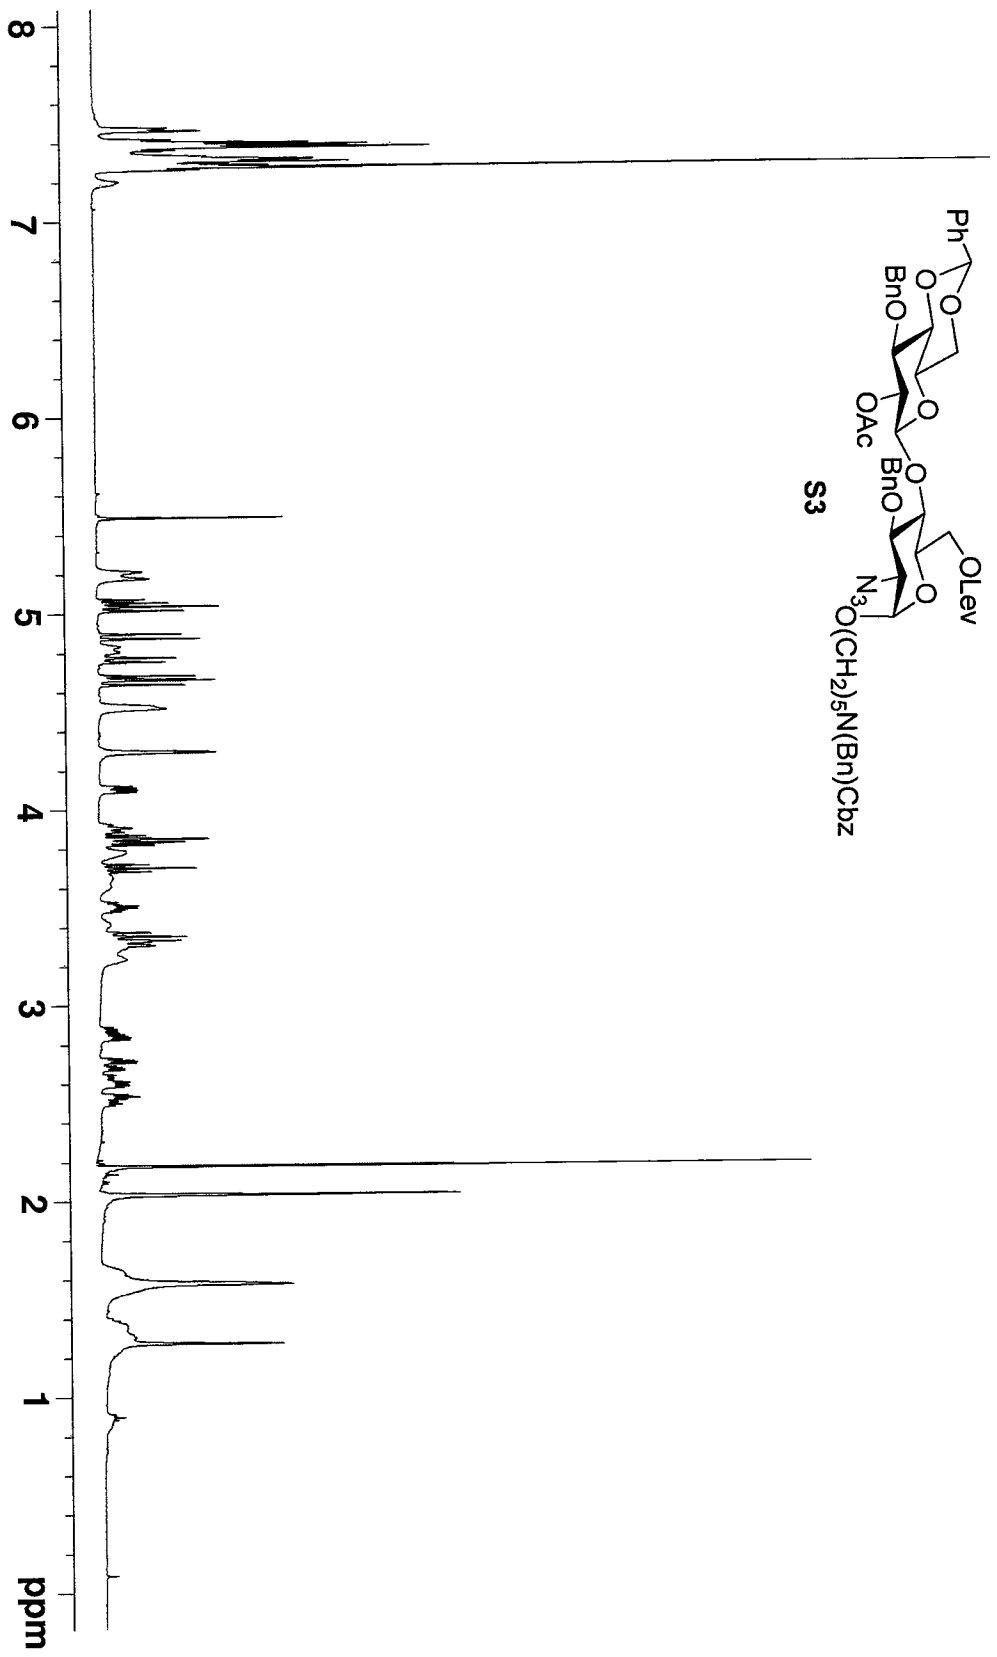

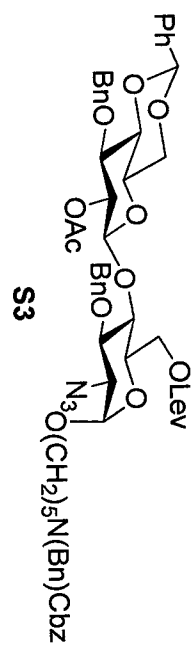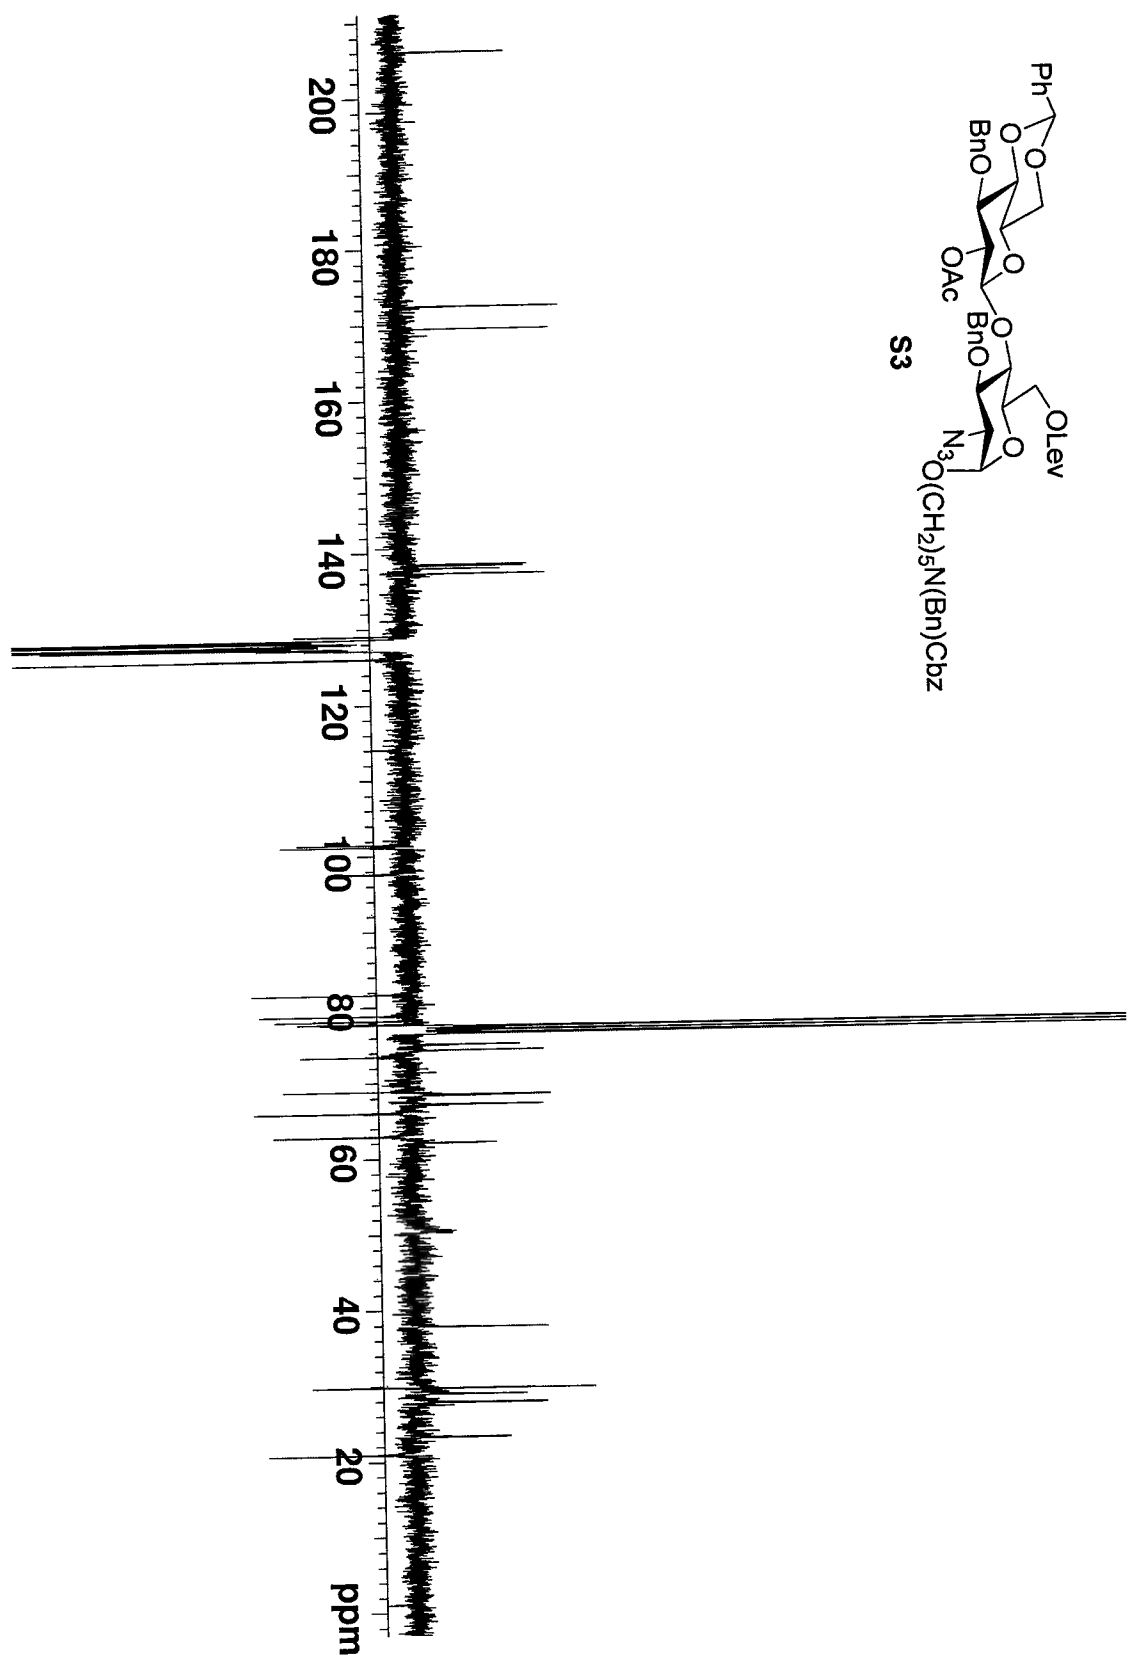



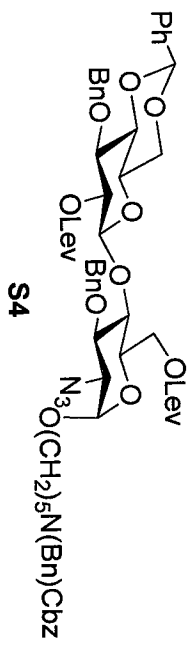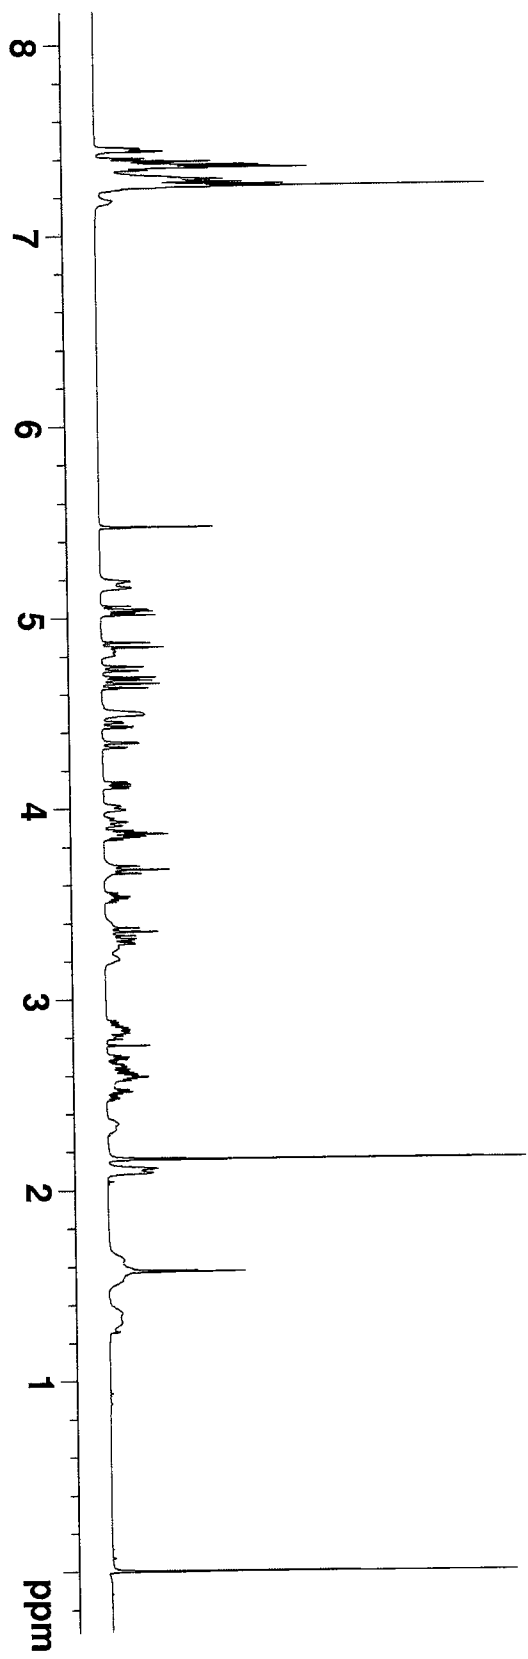

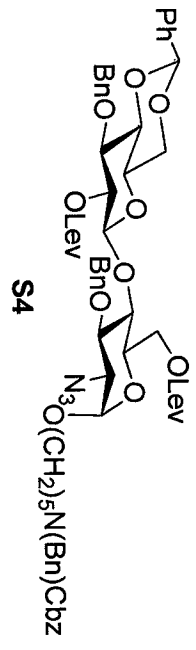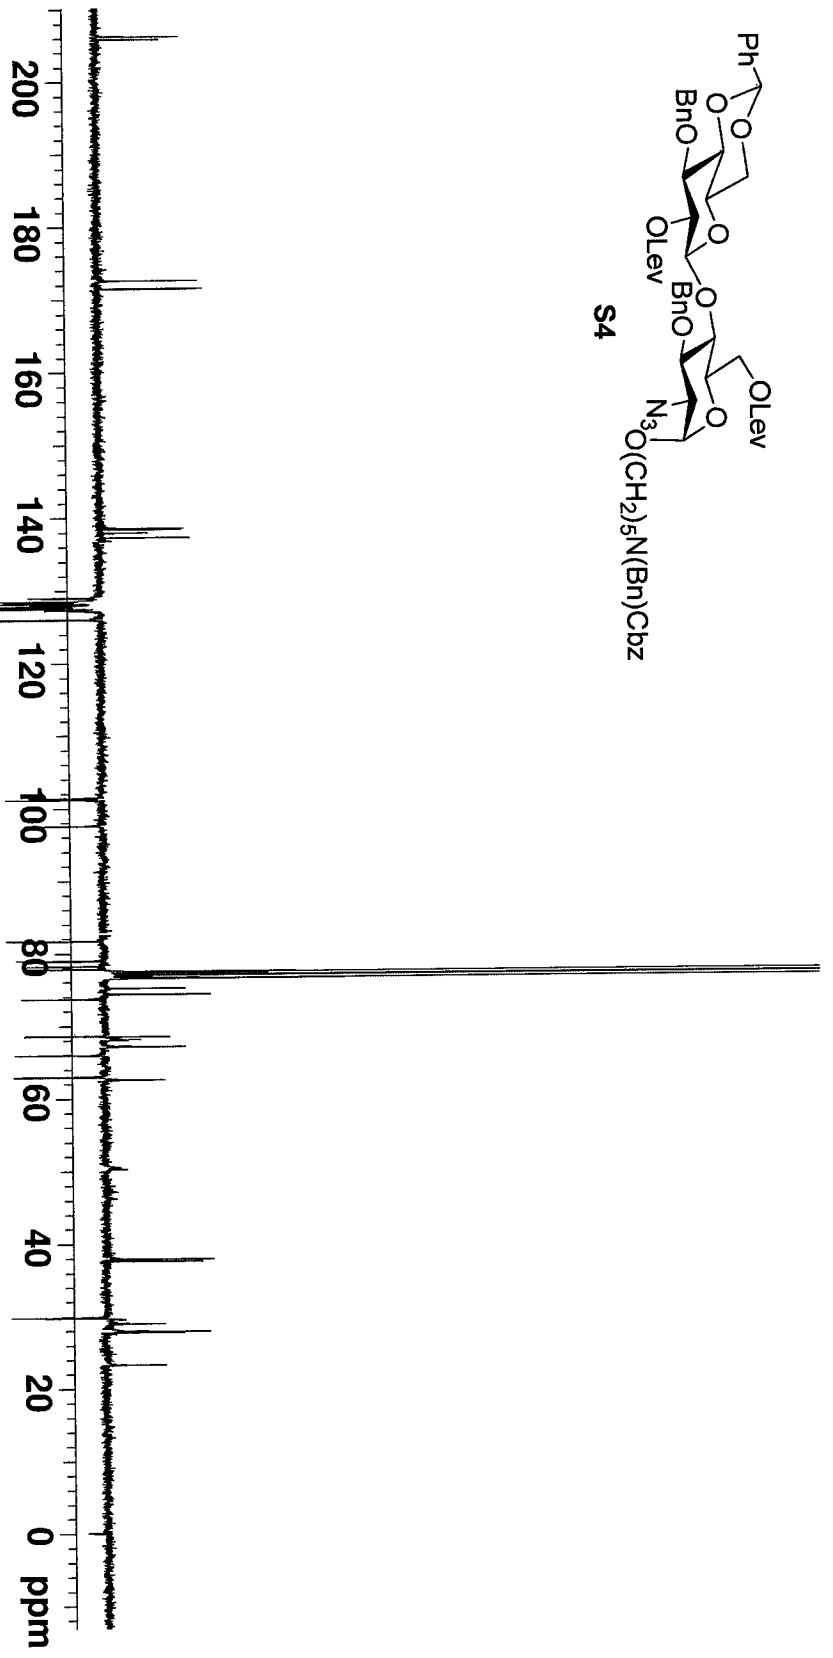

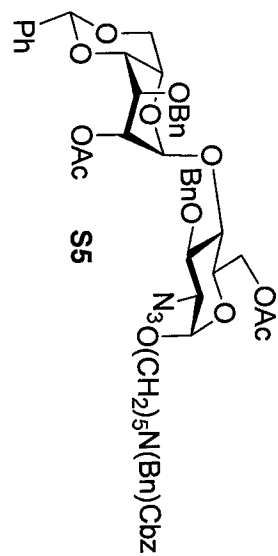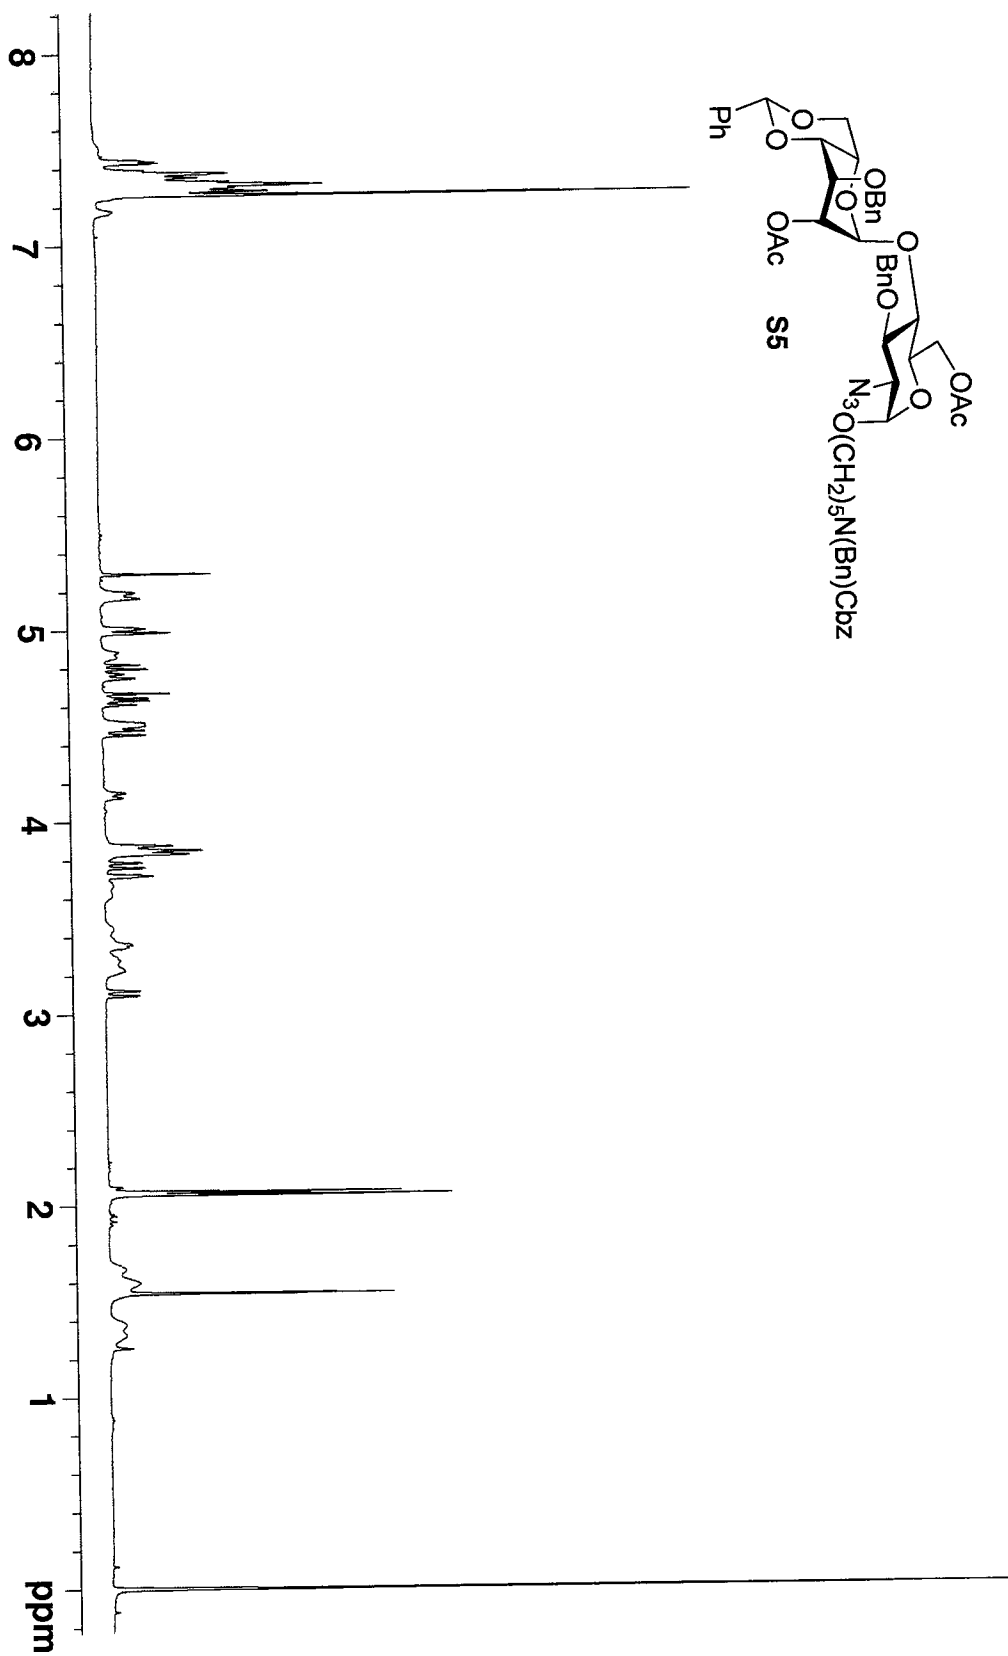

Pulse Sequence: APT

Solvent: cdcl3

Temp. 25.0 C / 298.1 K

Relax. delay 1.000 sec  
1st pulse 90.0 degrees  
2nd pulse 135.0 degrees  
Acq. time 1.000 sec  
Width 18115.9 Hz  
24000 repetitions  
OBSERVE C13, 75.4528206 MHz  
DECODER H1, 300.0720883 MHz  
Power 37 dB  
on during acquisition  
WALTZ-16 modulated  
DATA PROCESSING  
Line broadening 1.0 Hz  
FT size 65536  
Total time 13 hr, 30 min, 4 sec

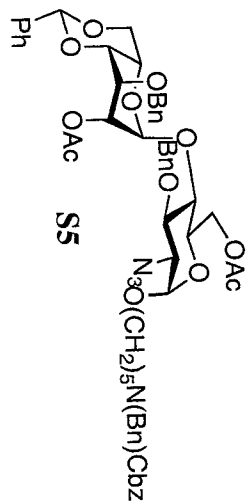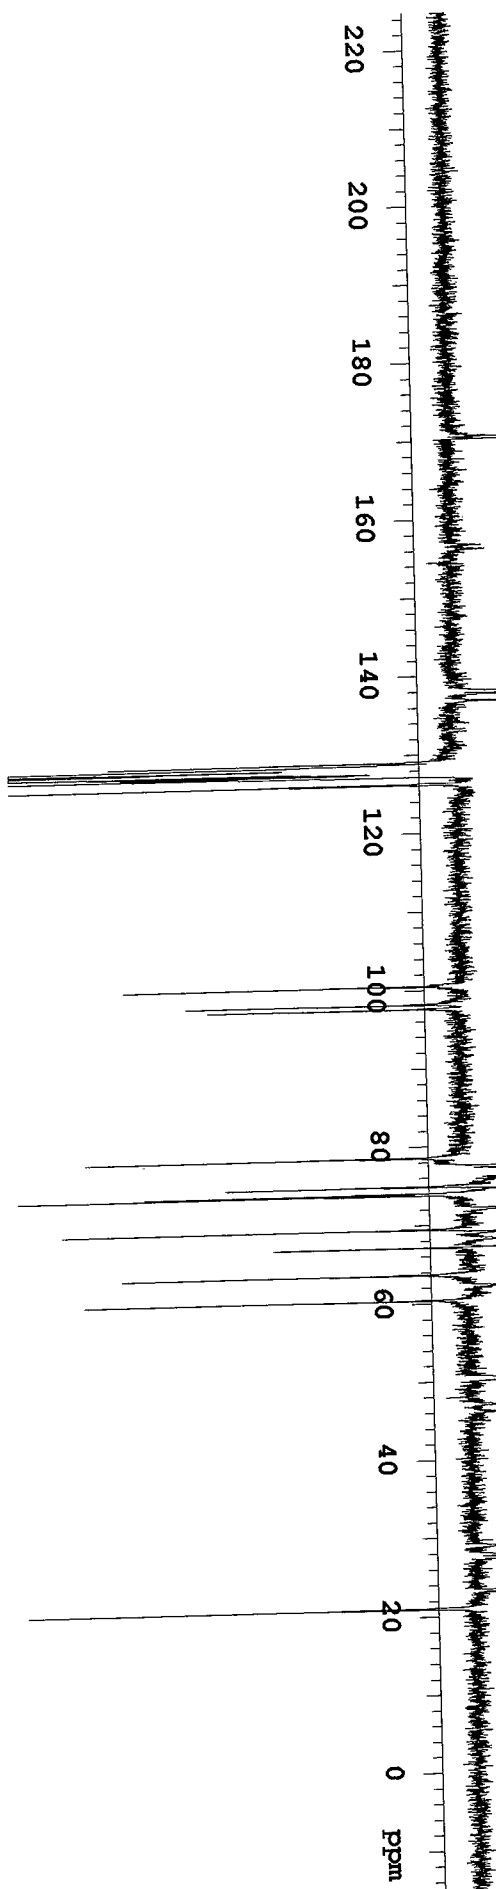

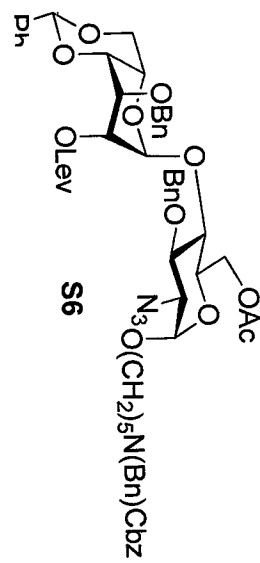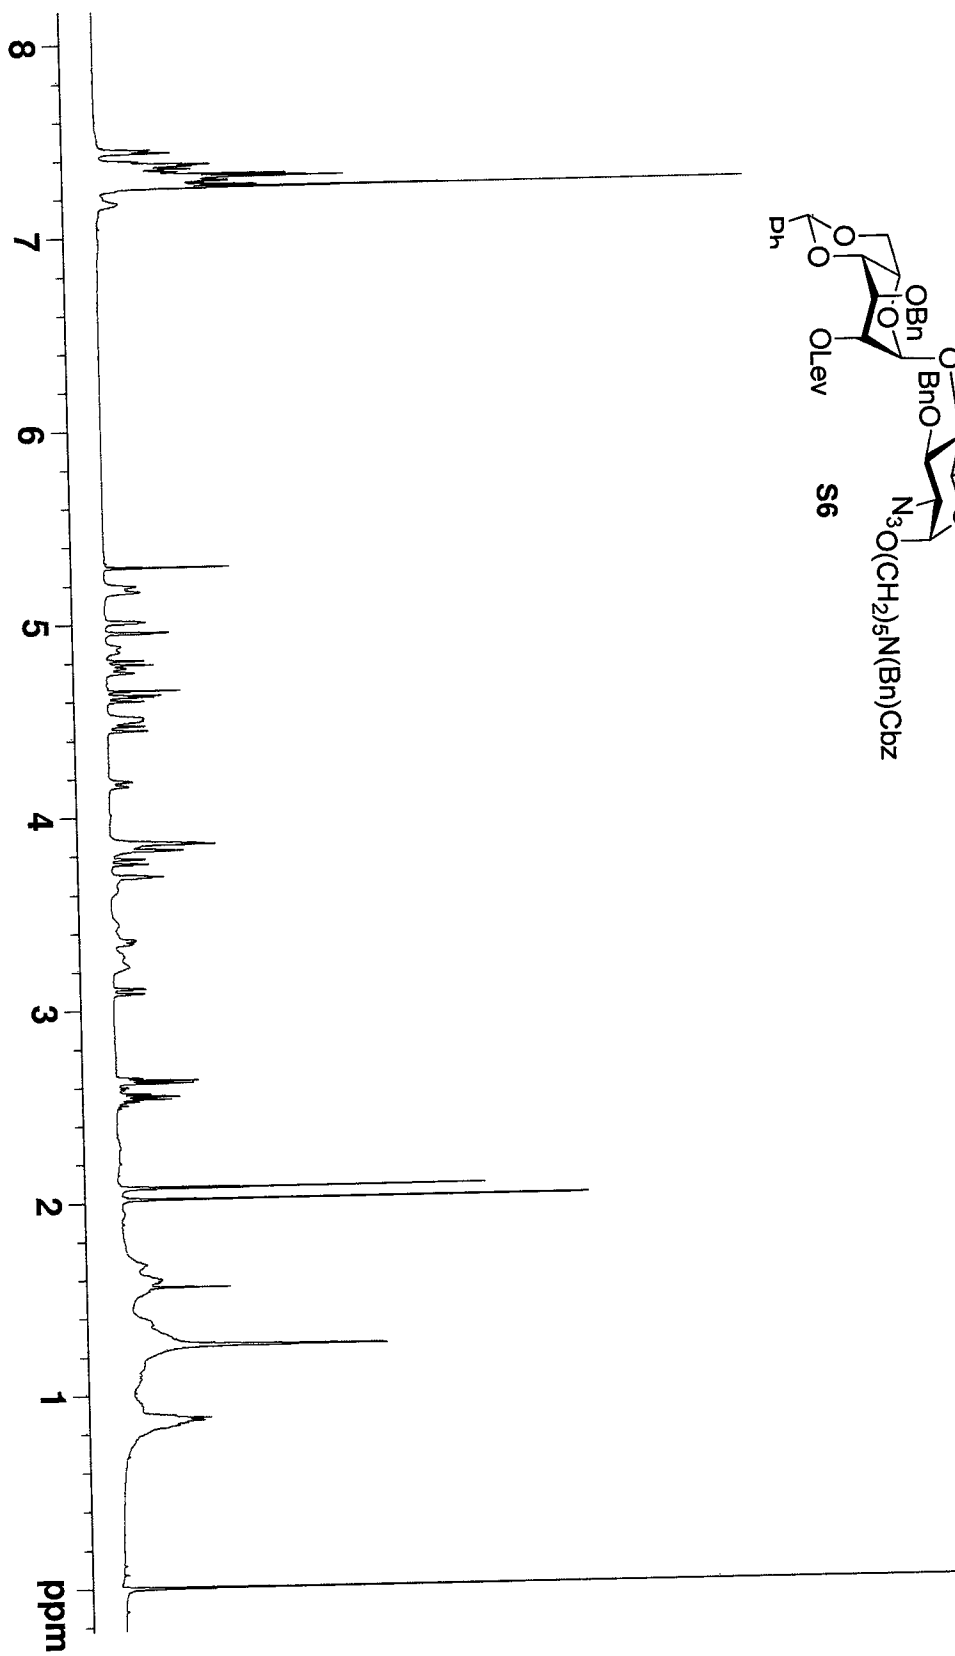



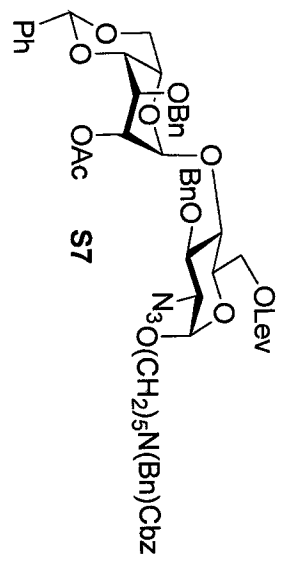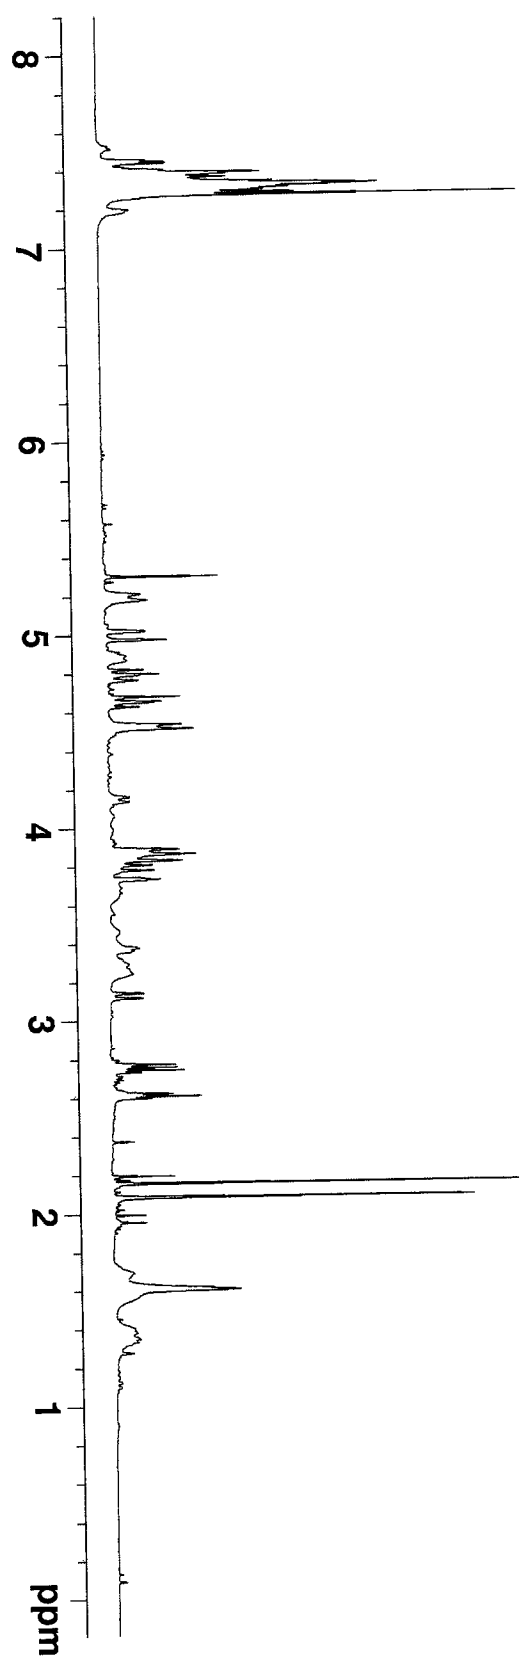

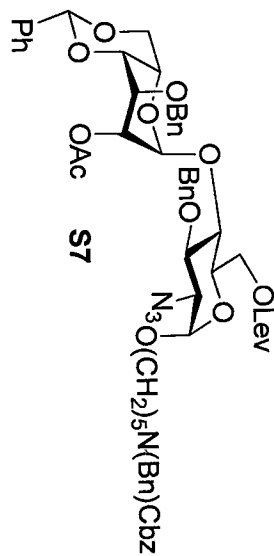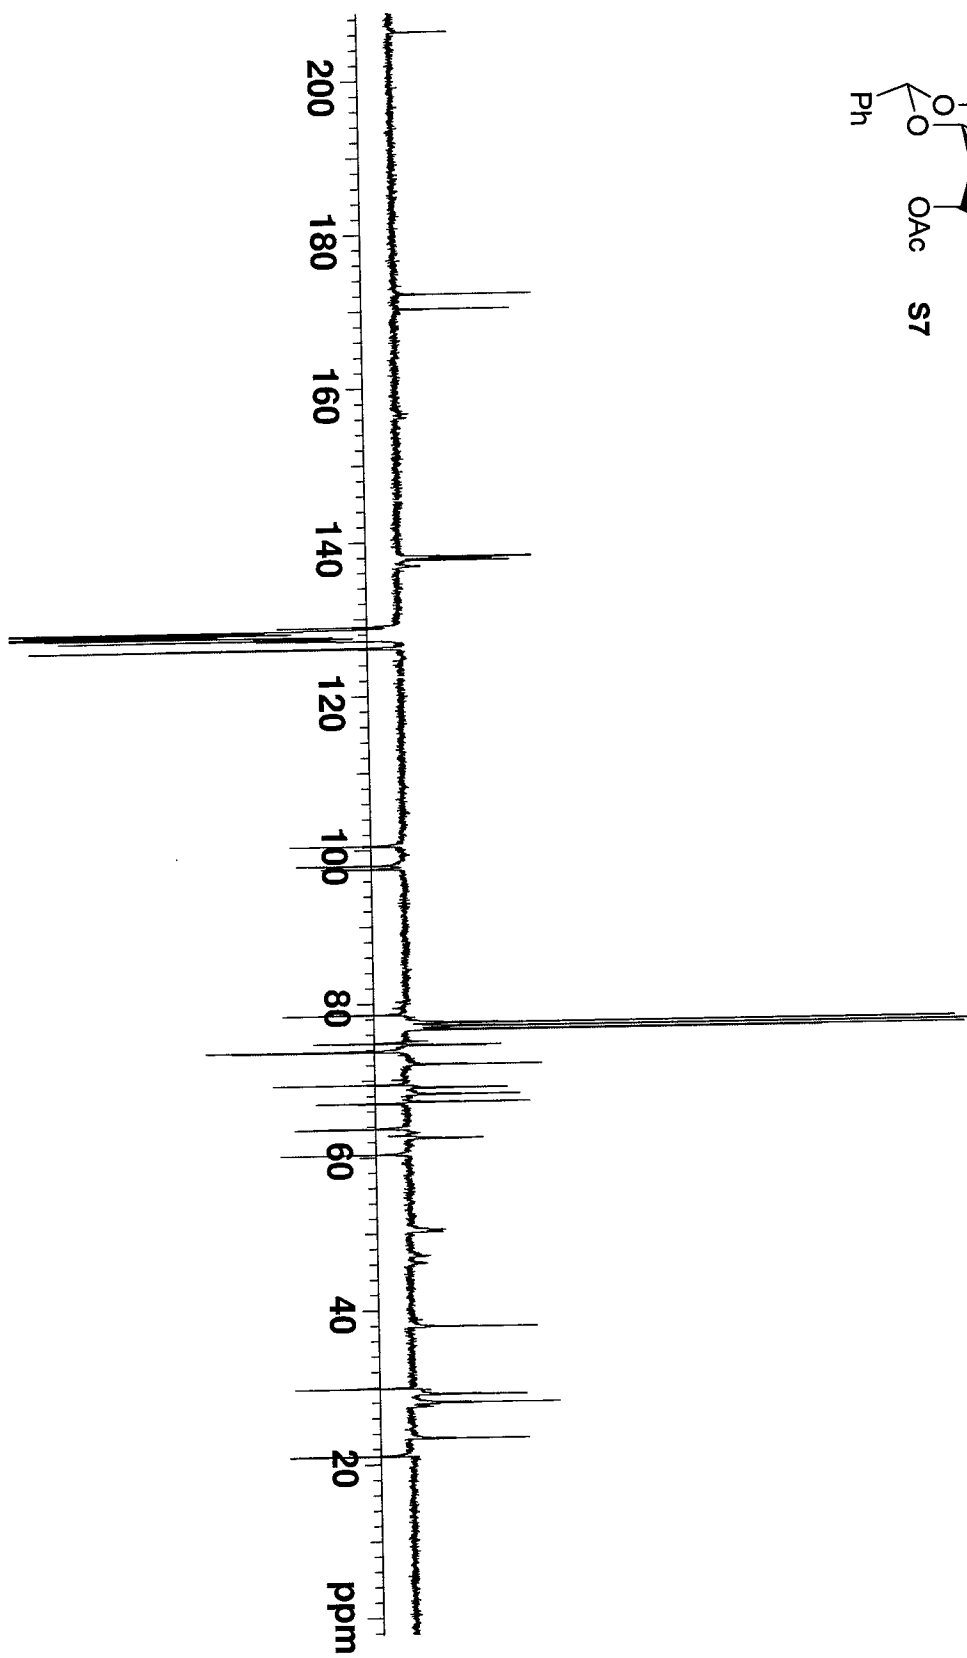



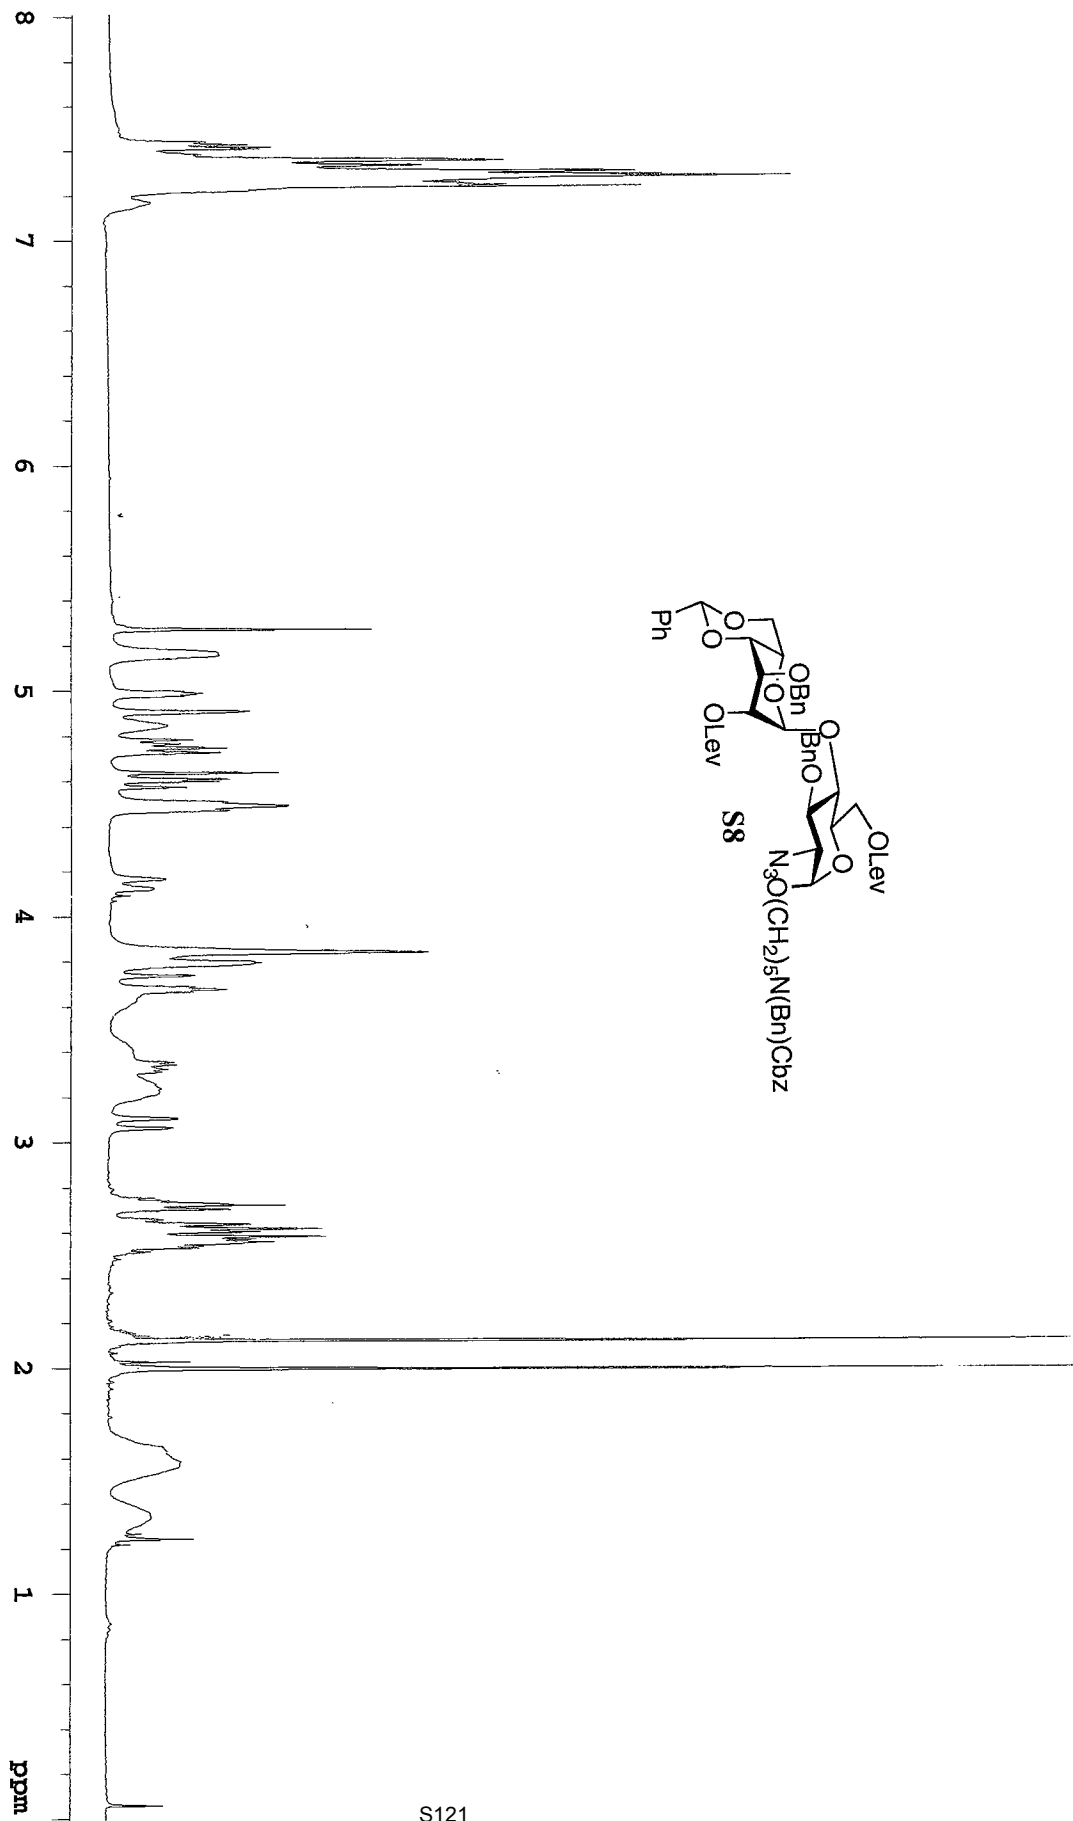

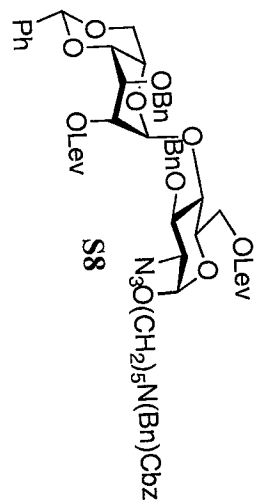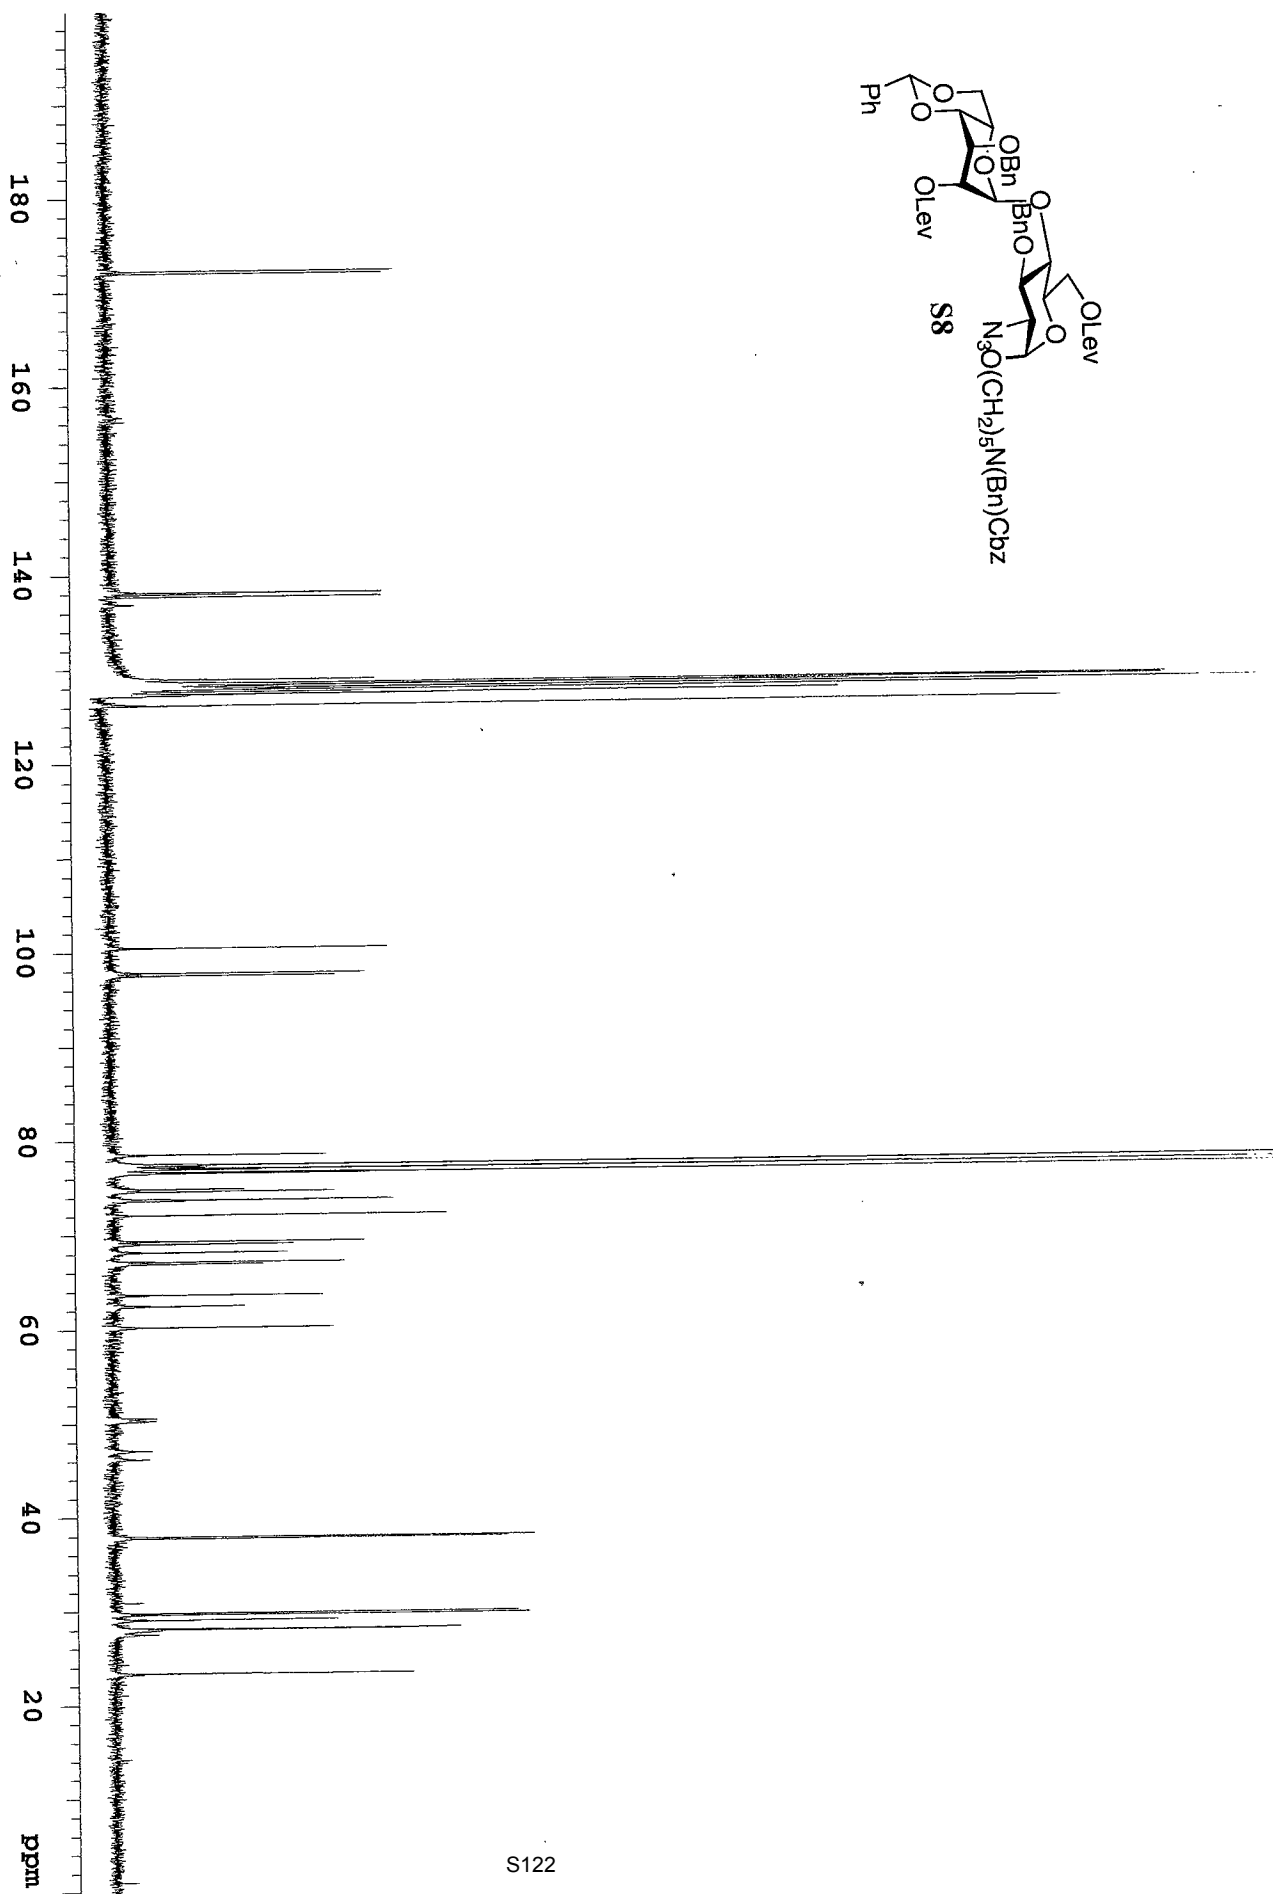

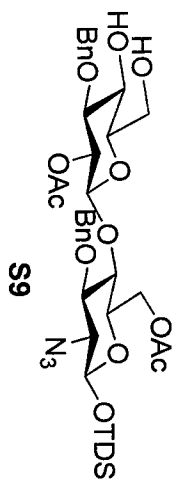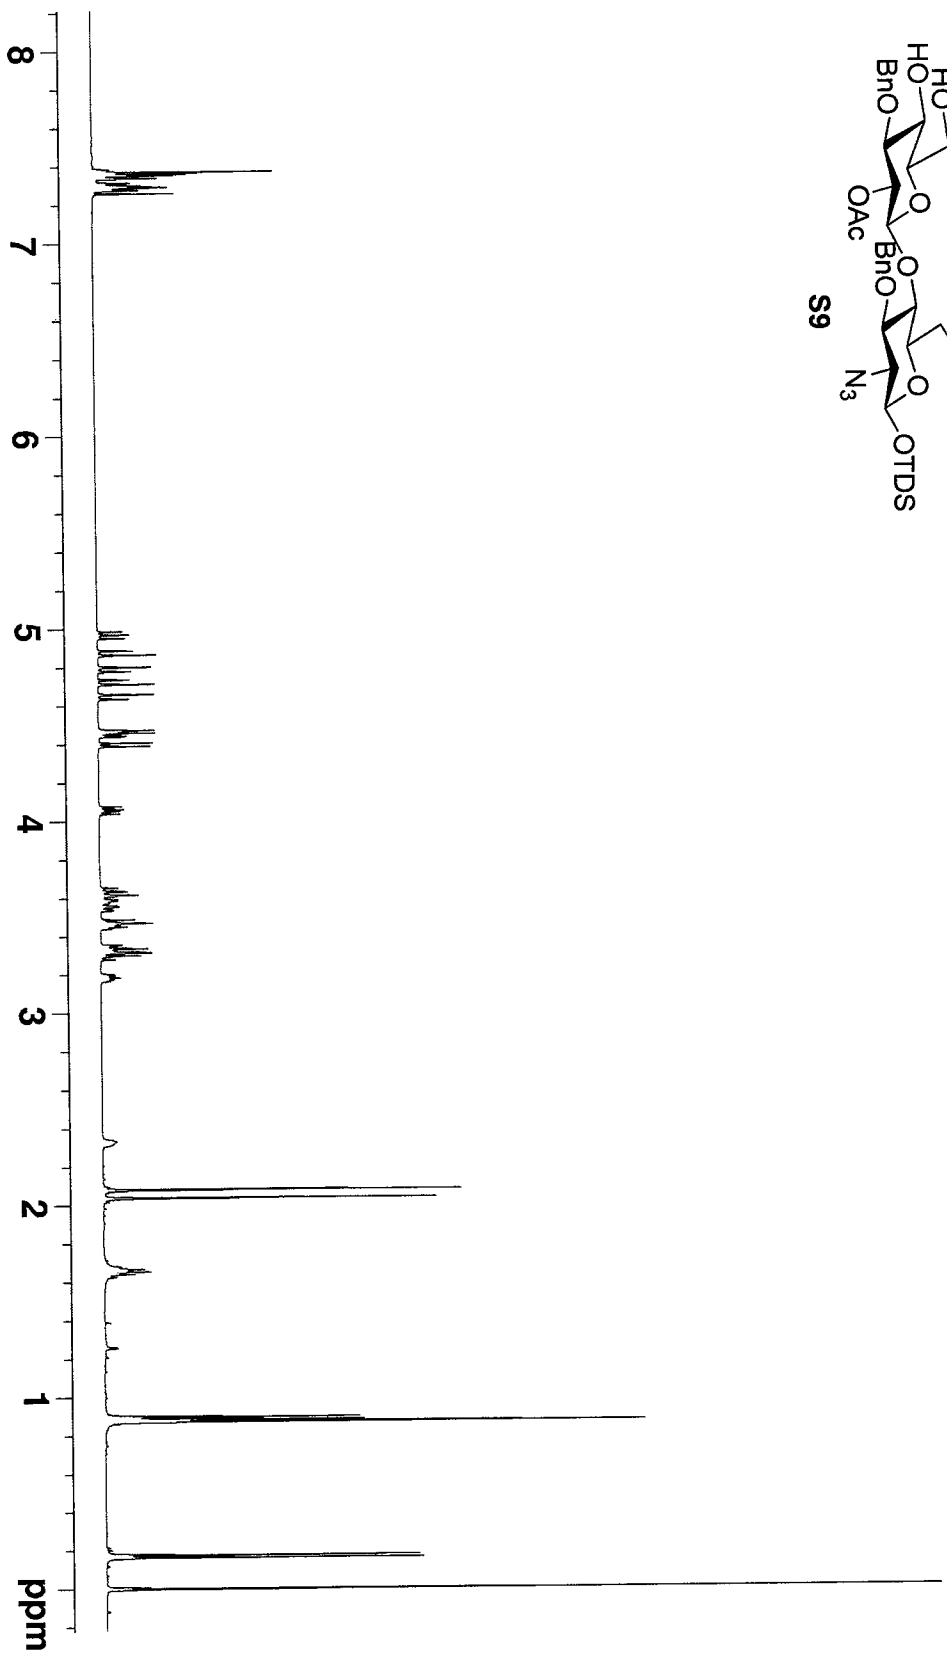

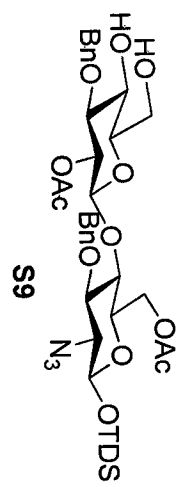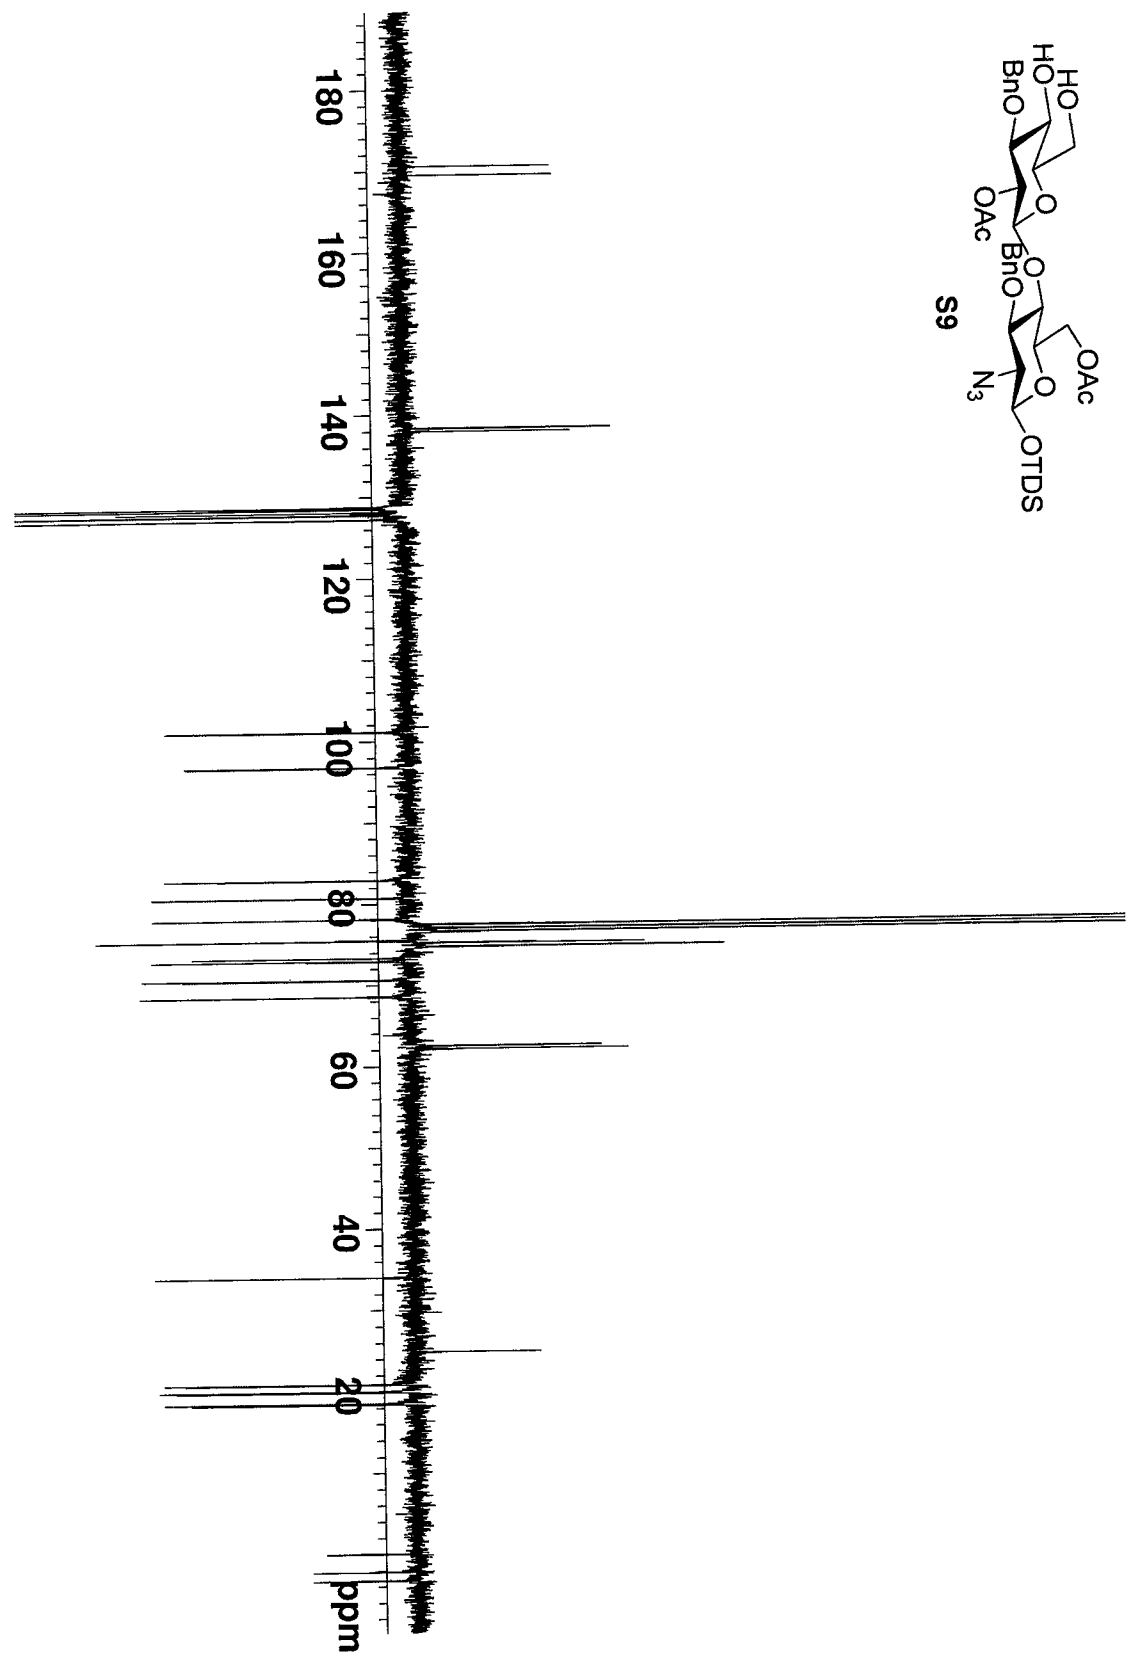

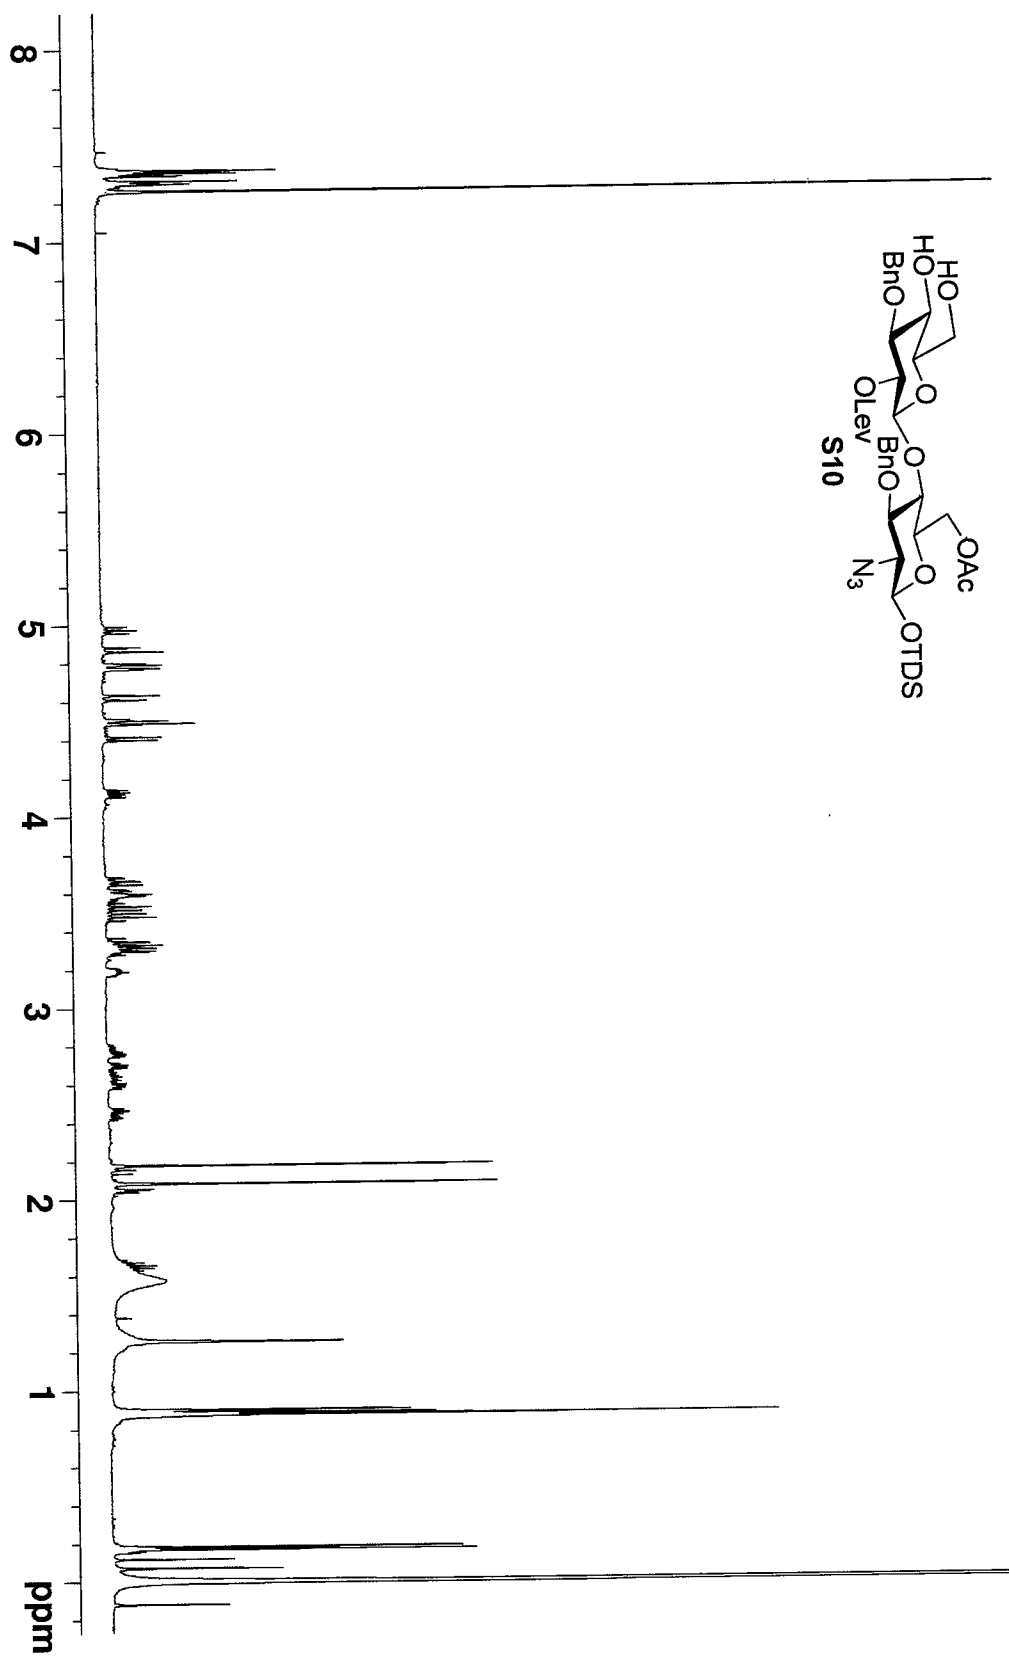

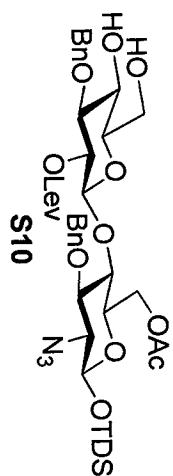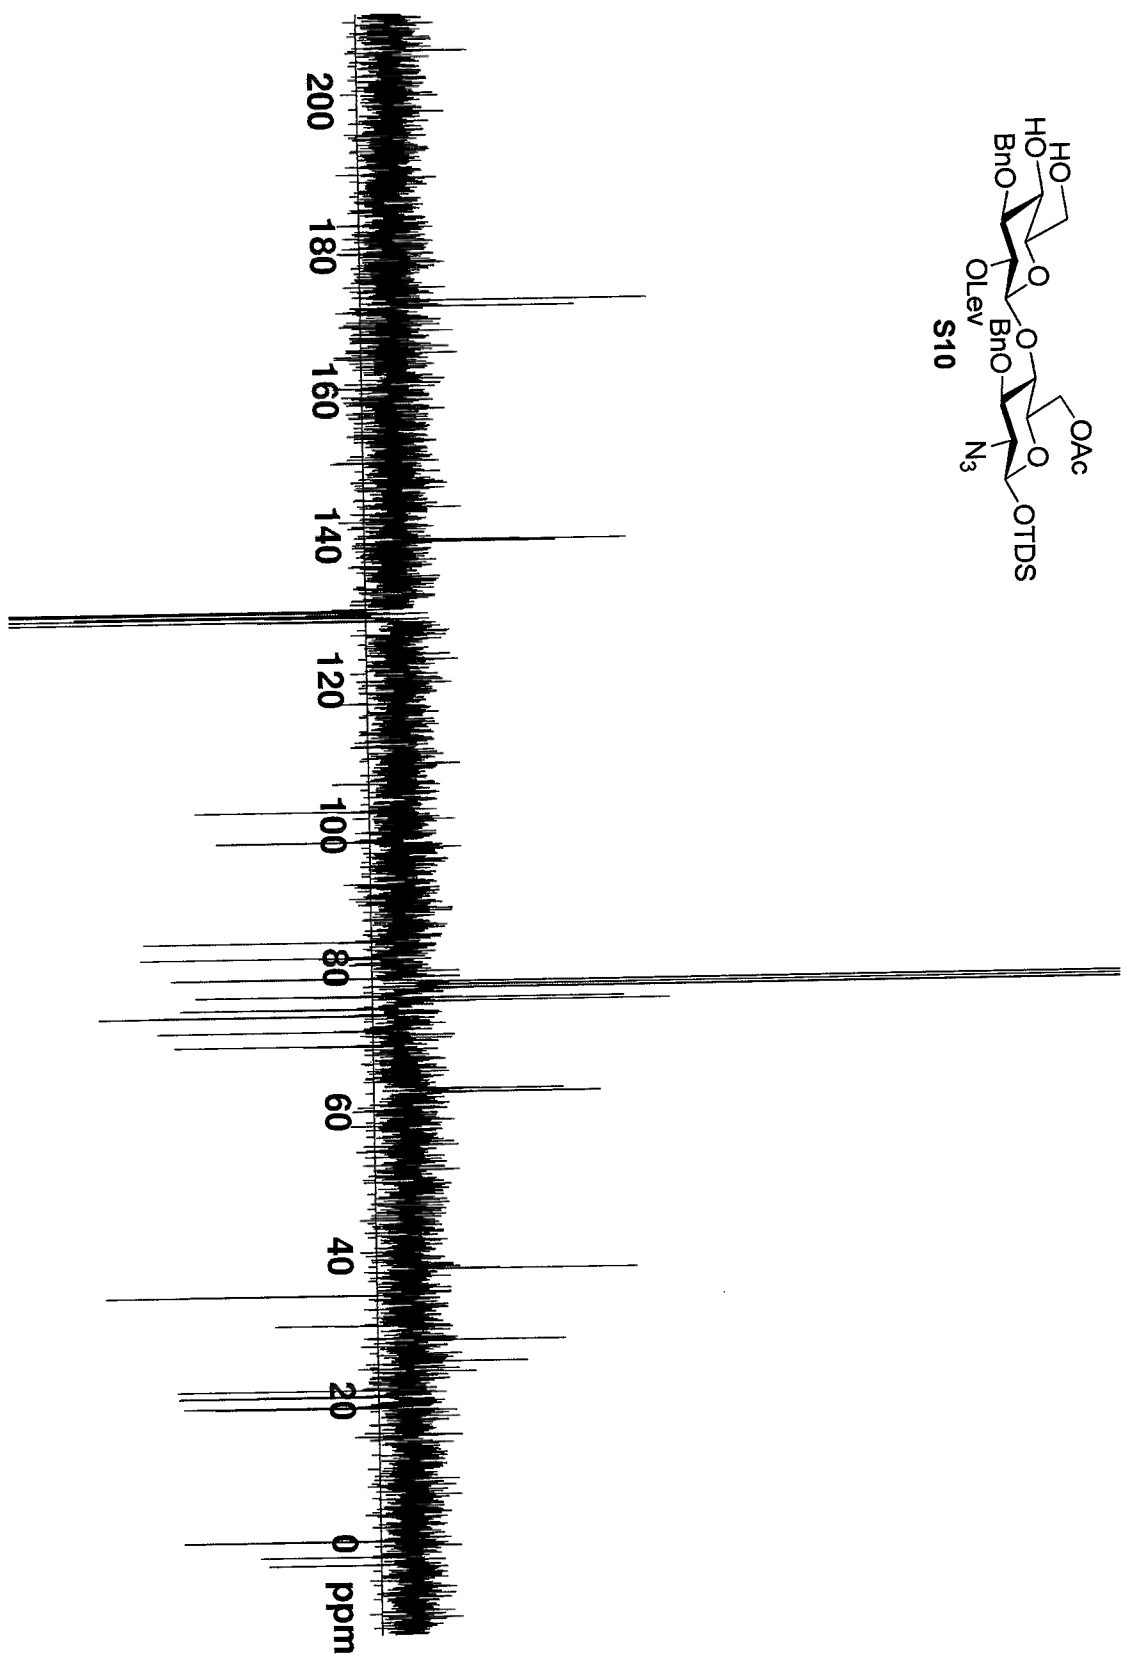

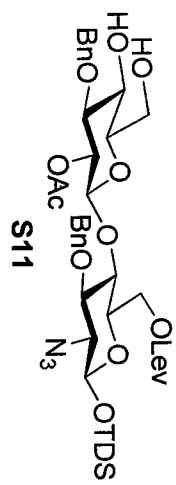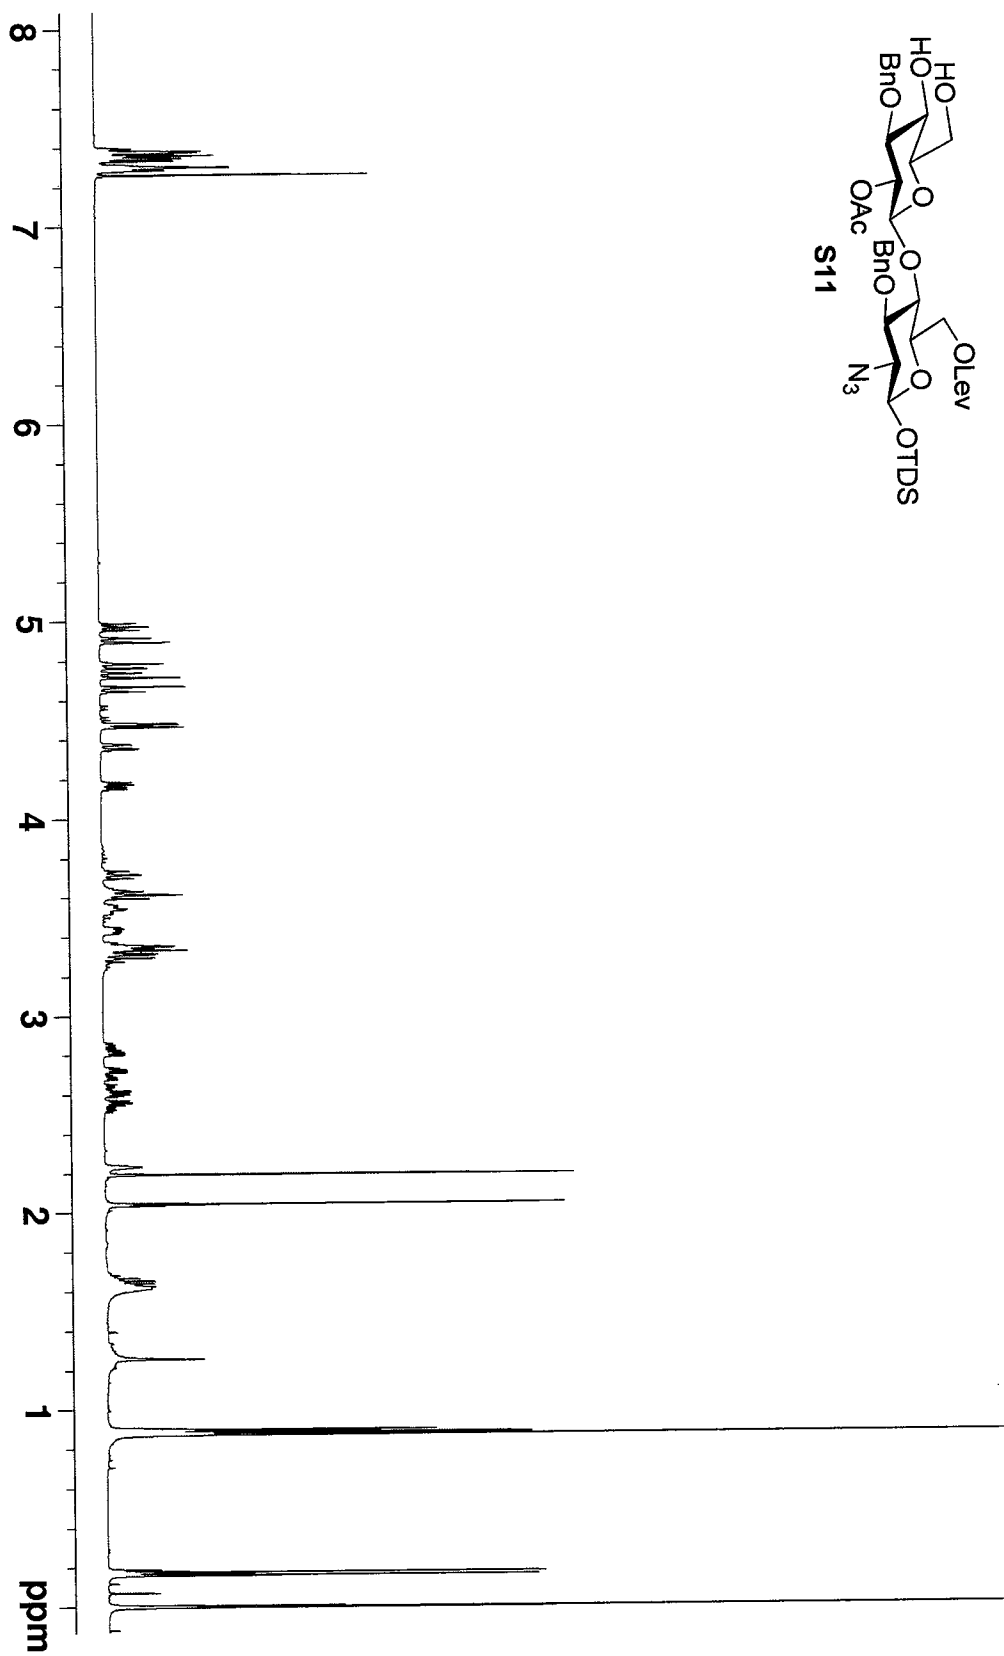

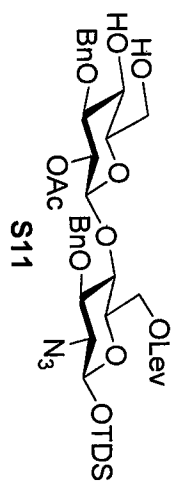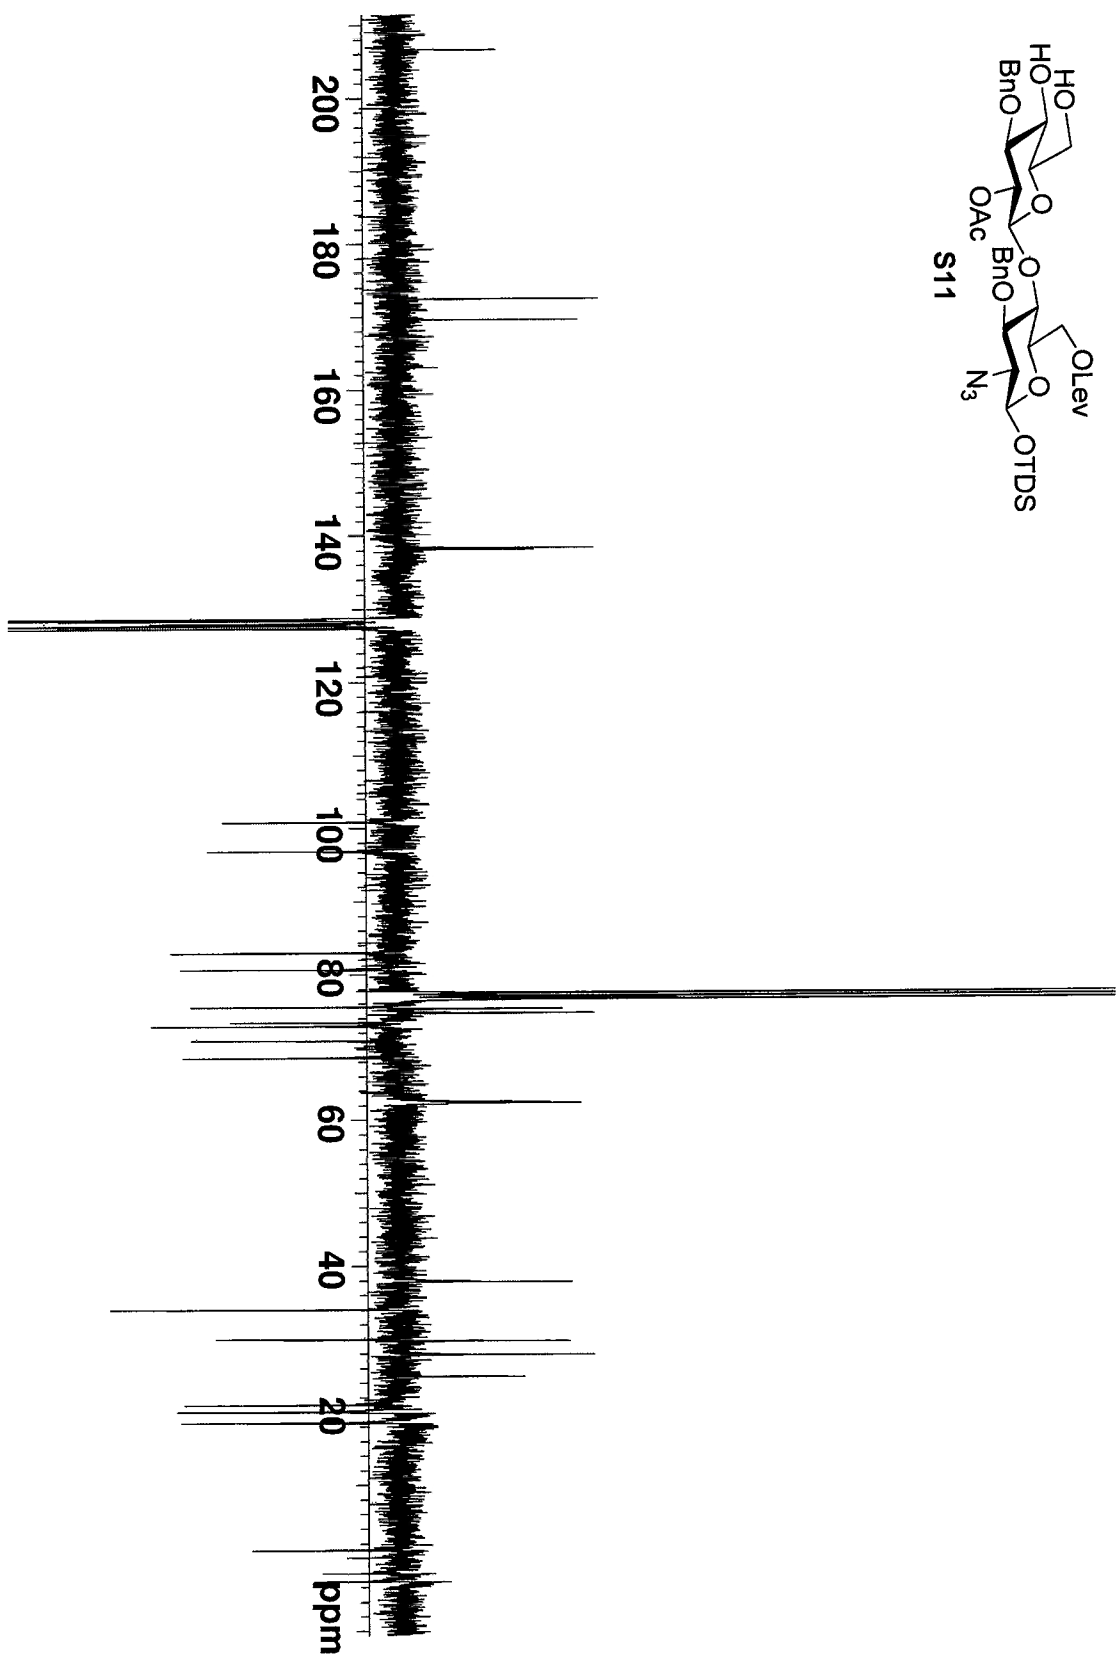



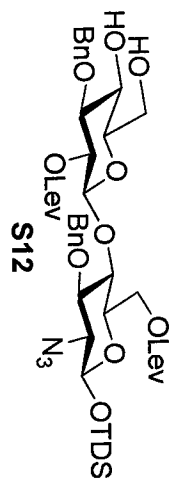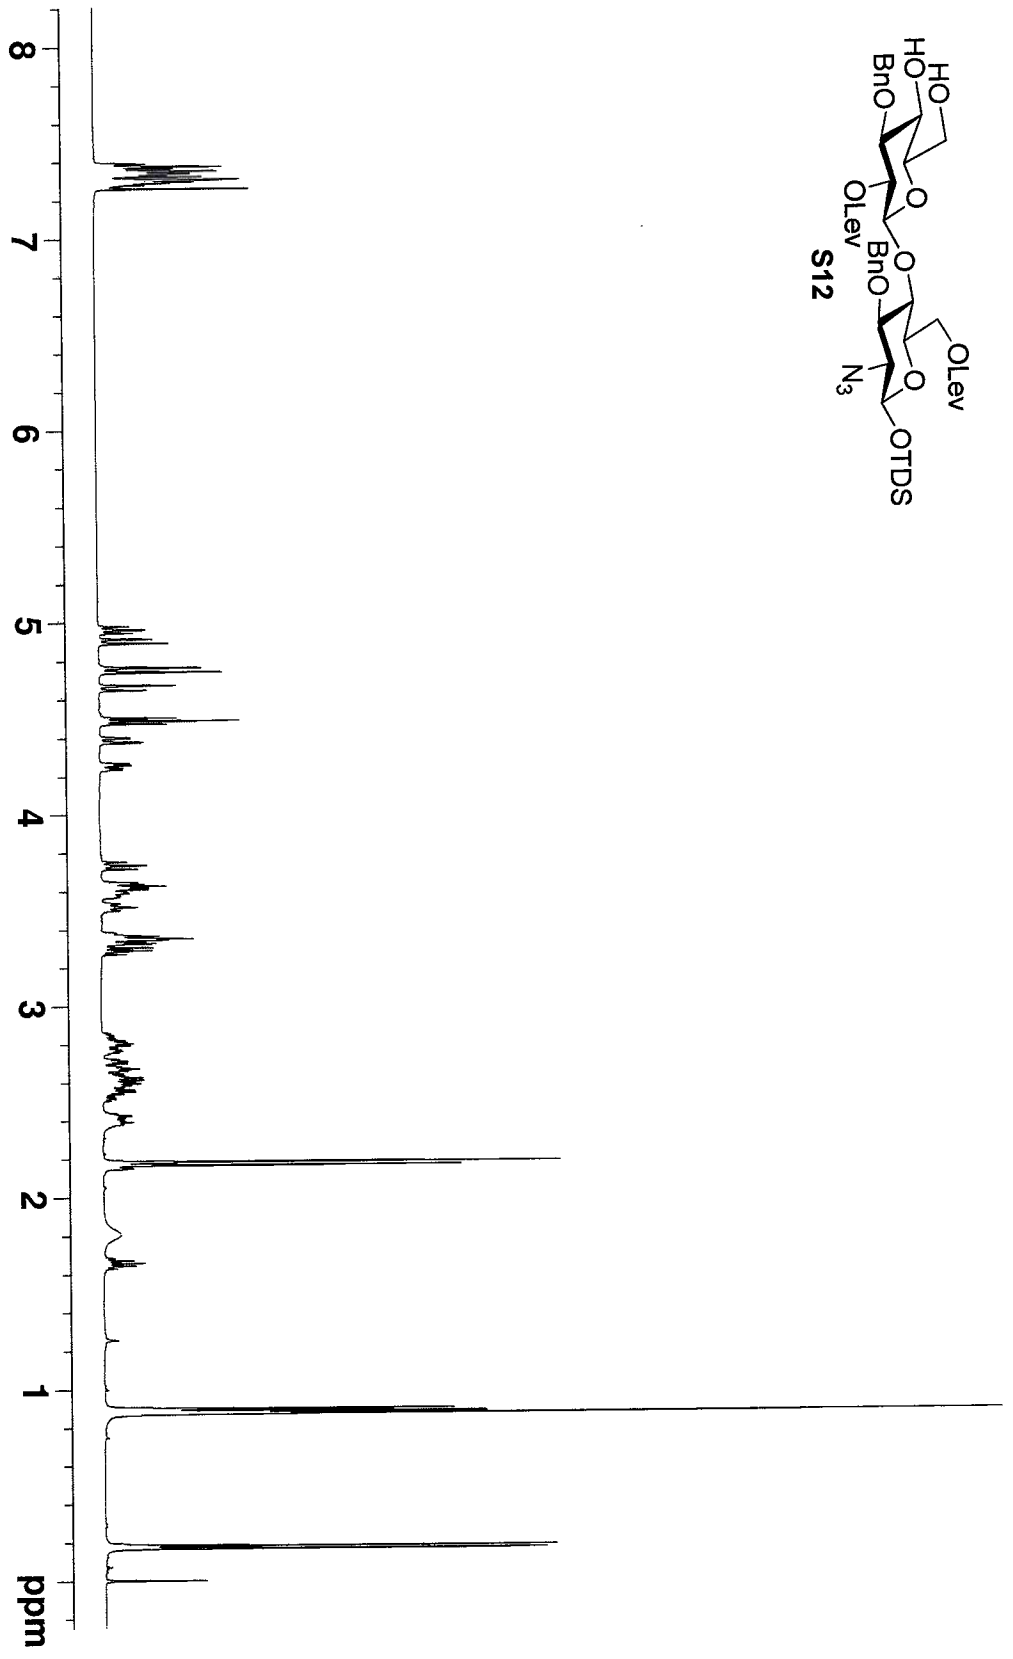

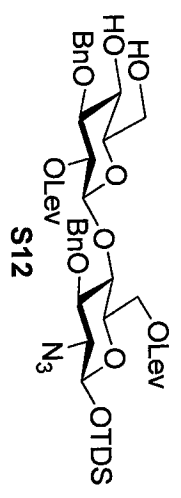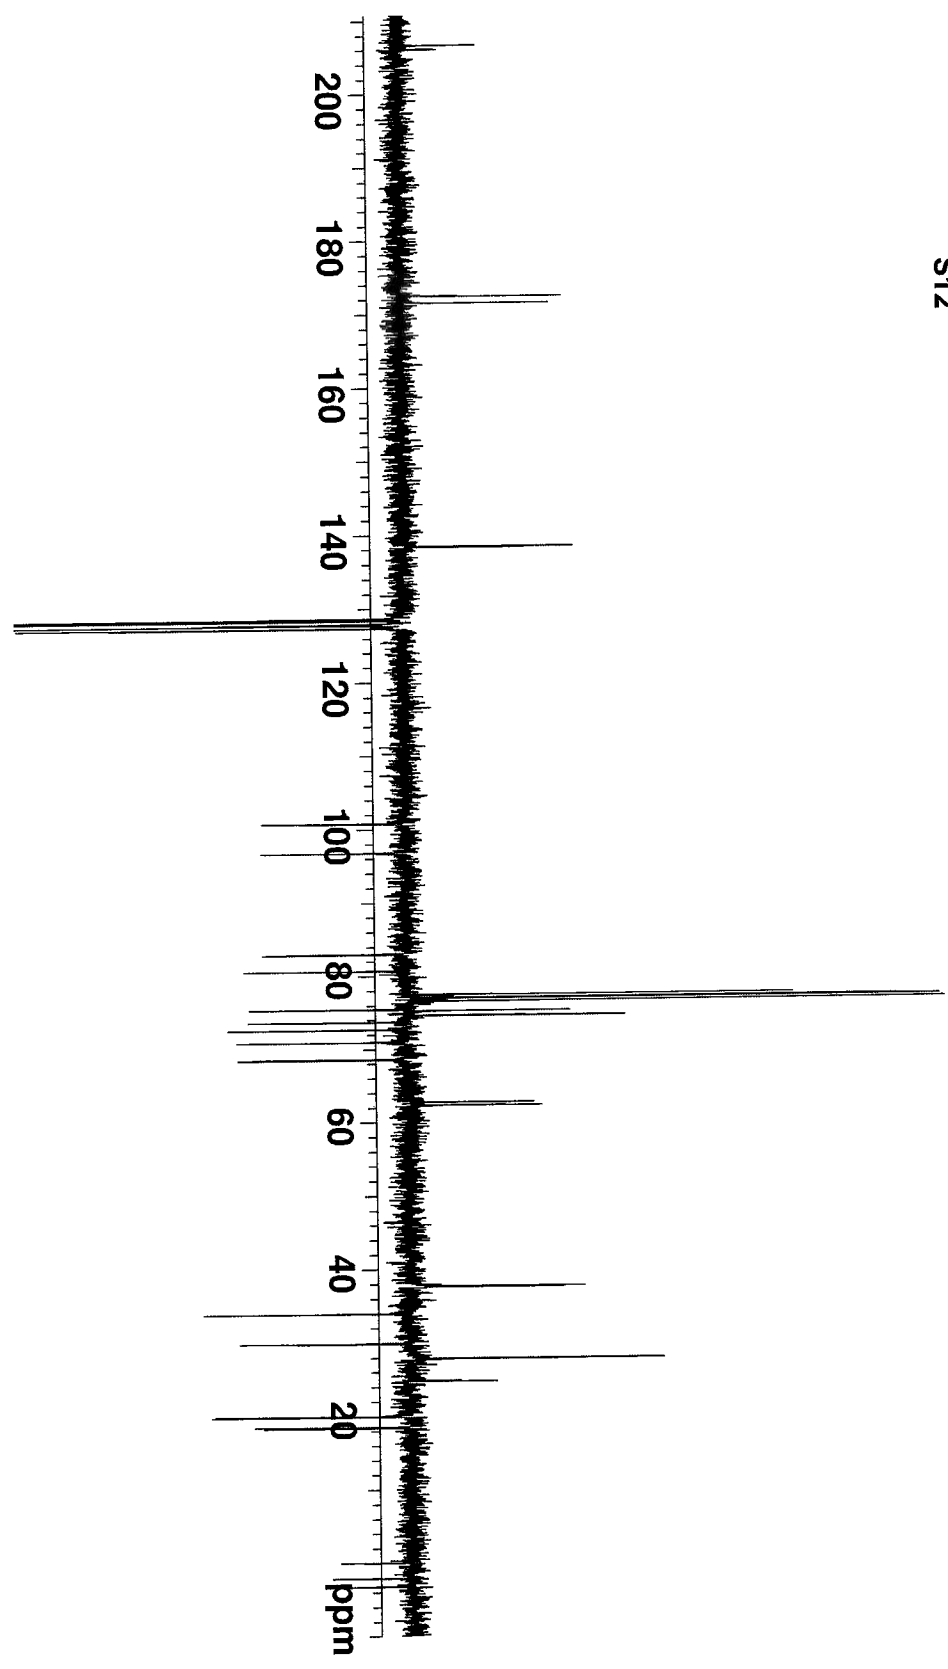

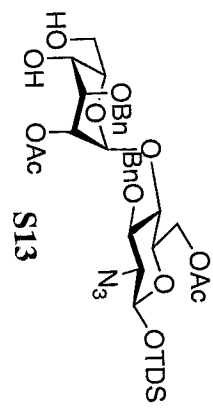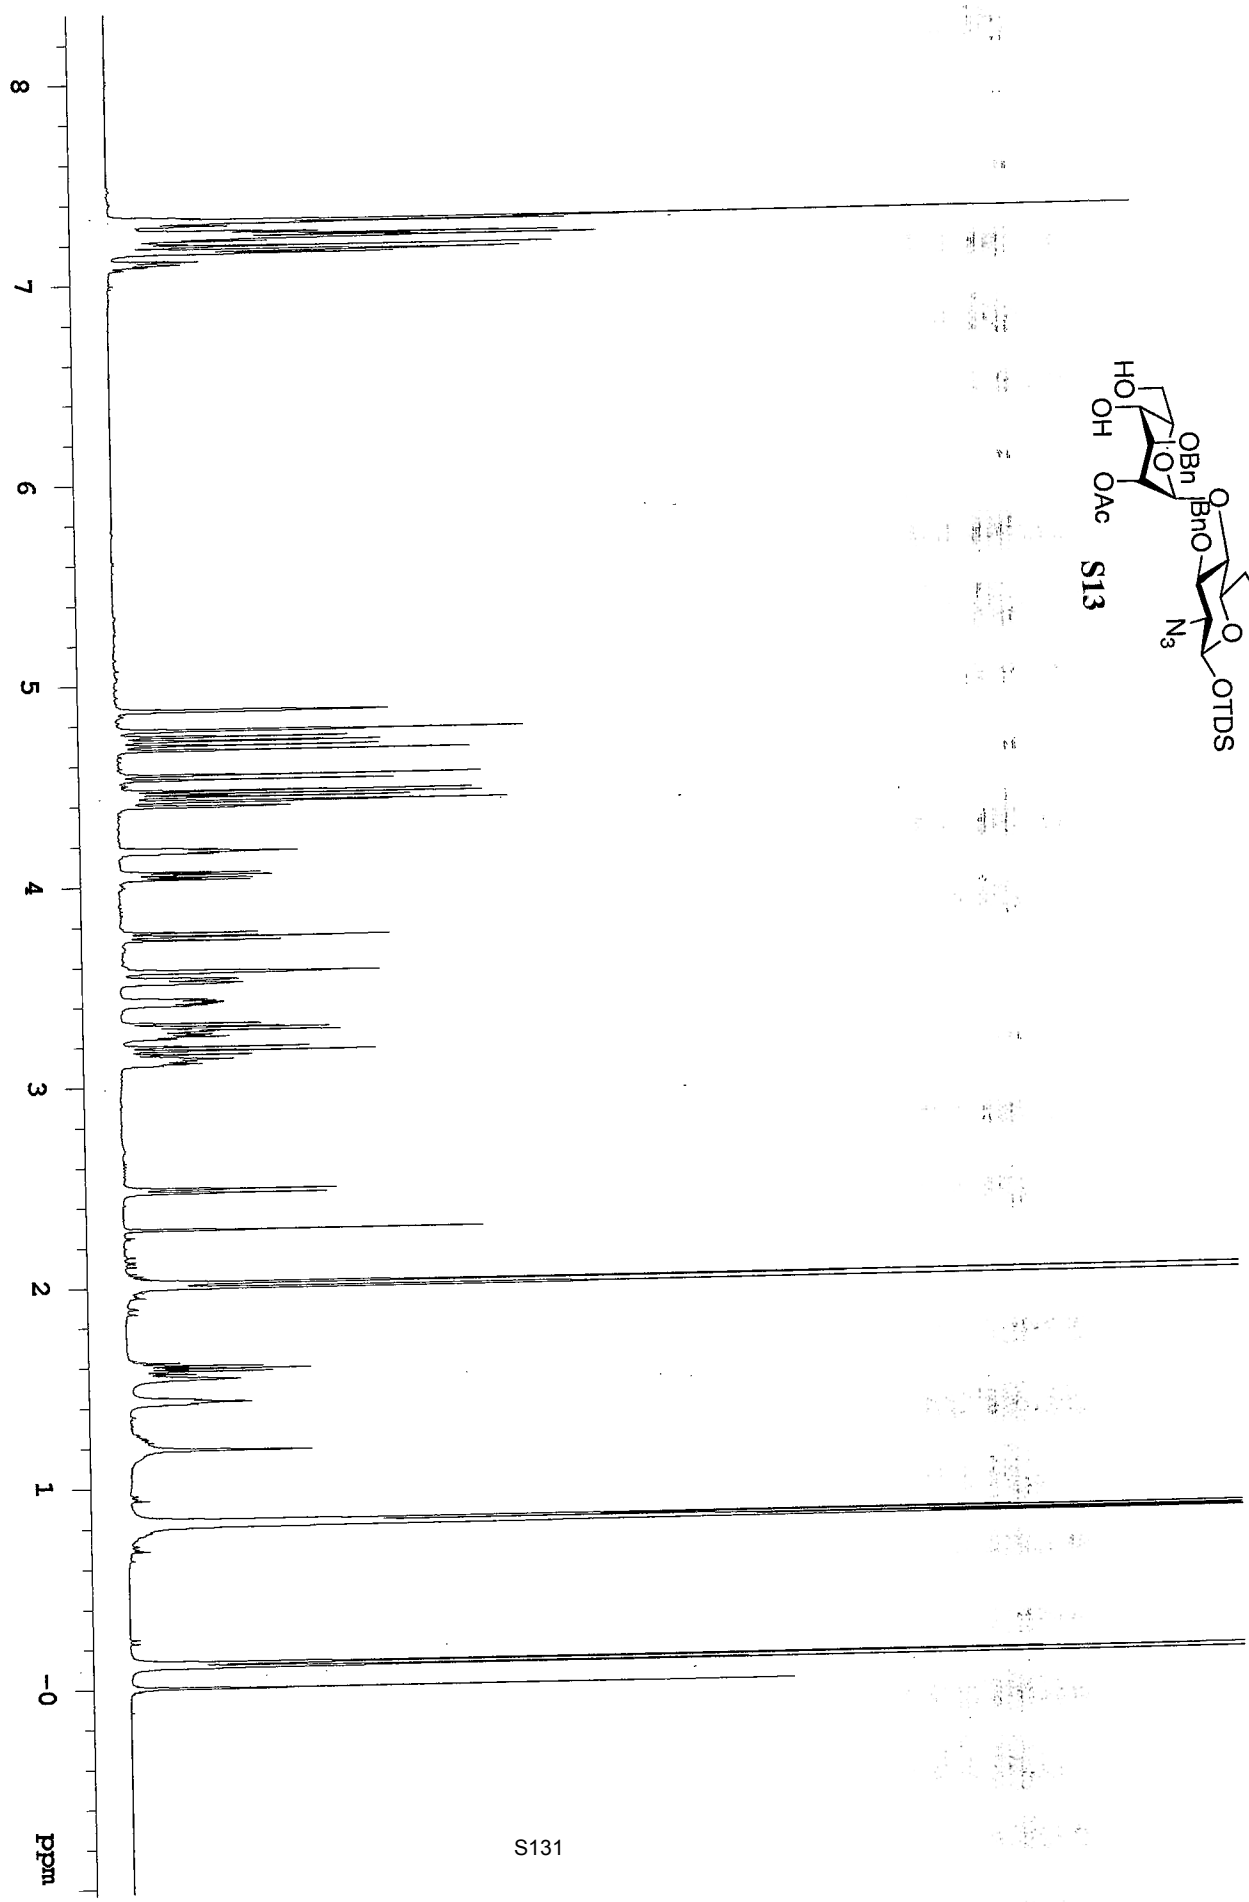

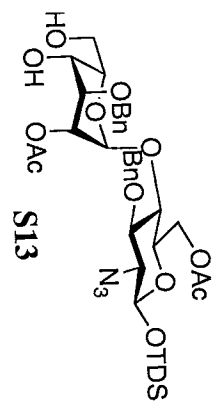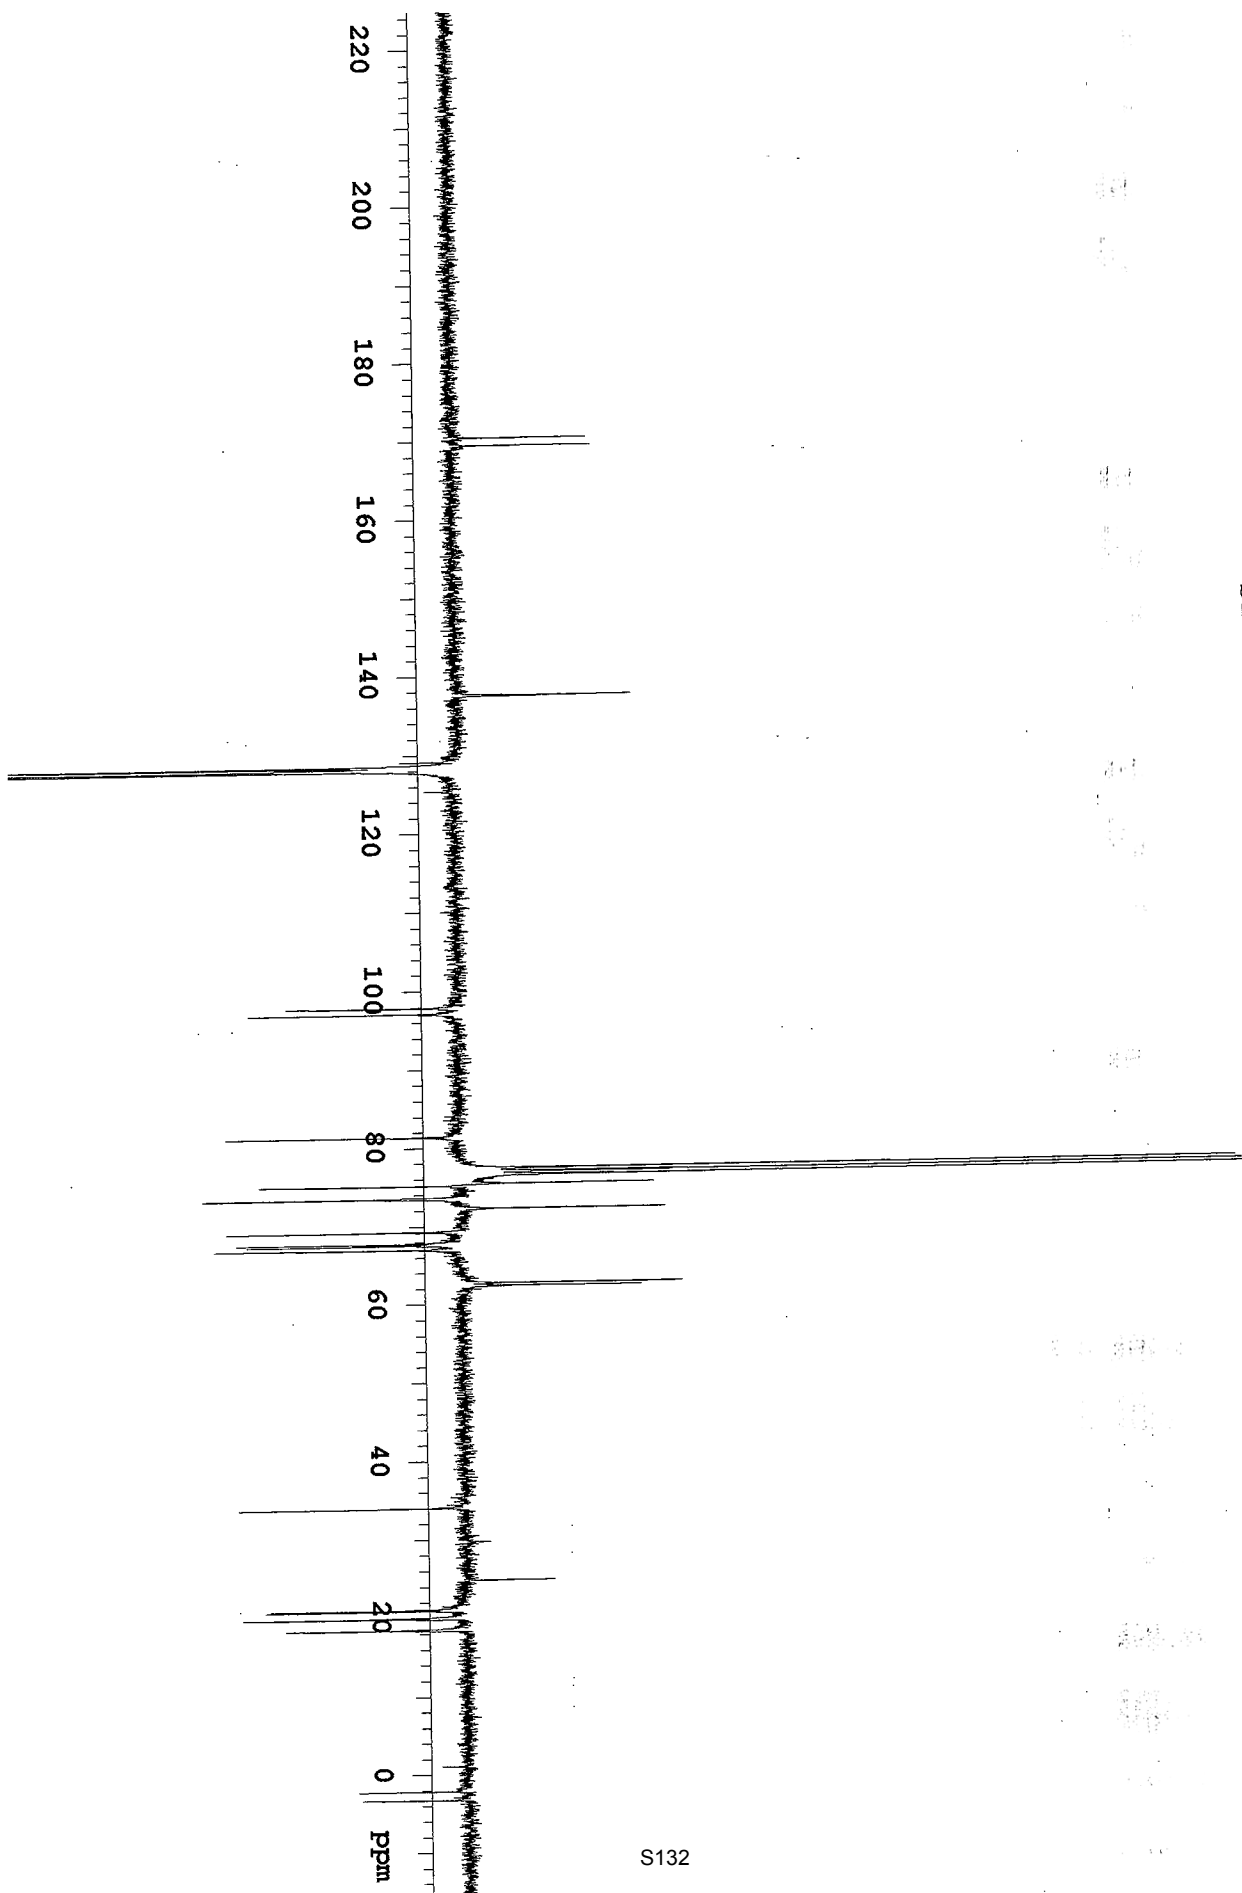

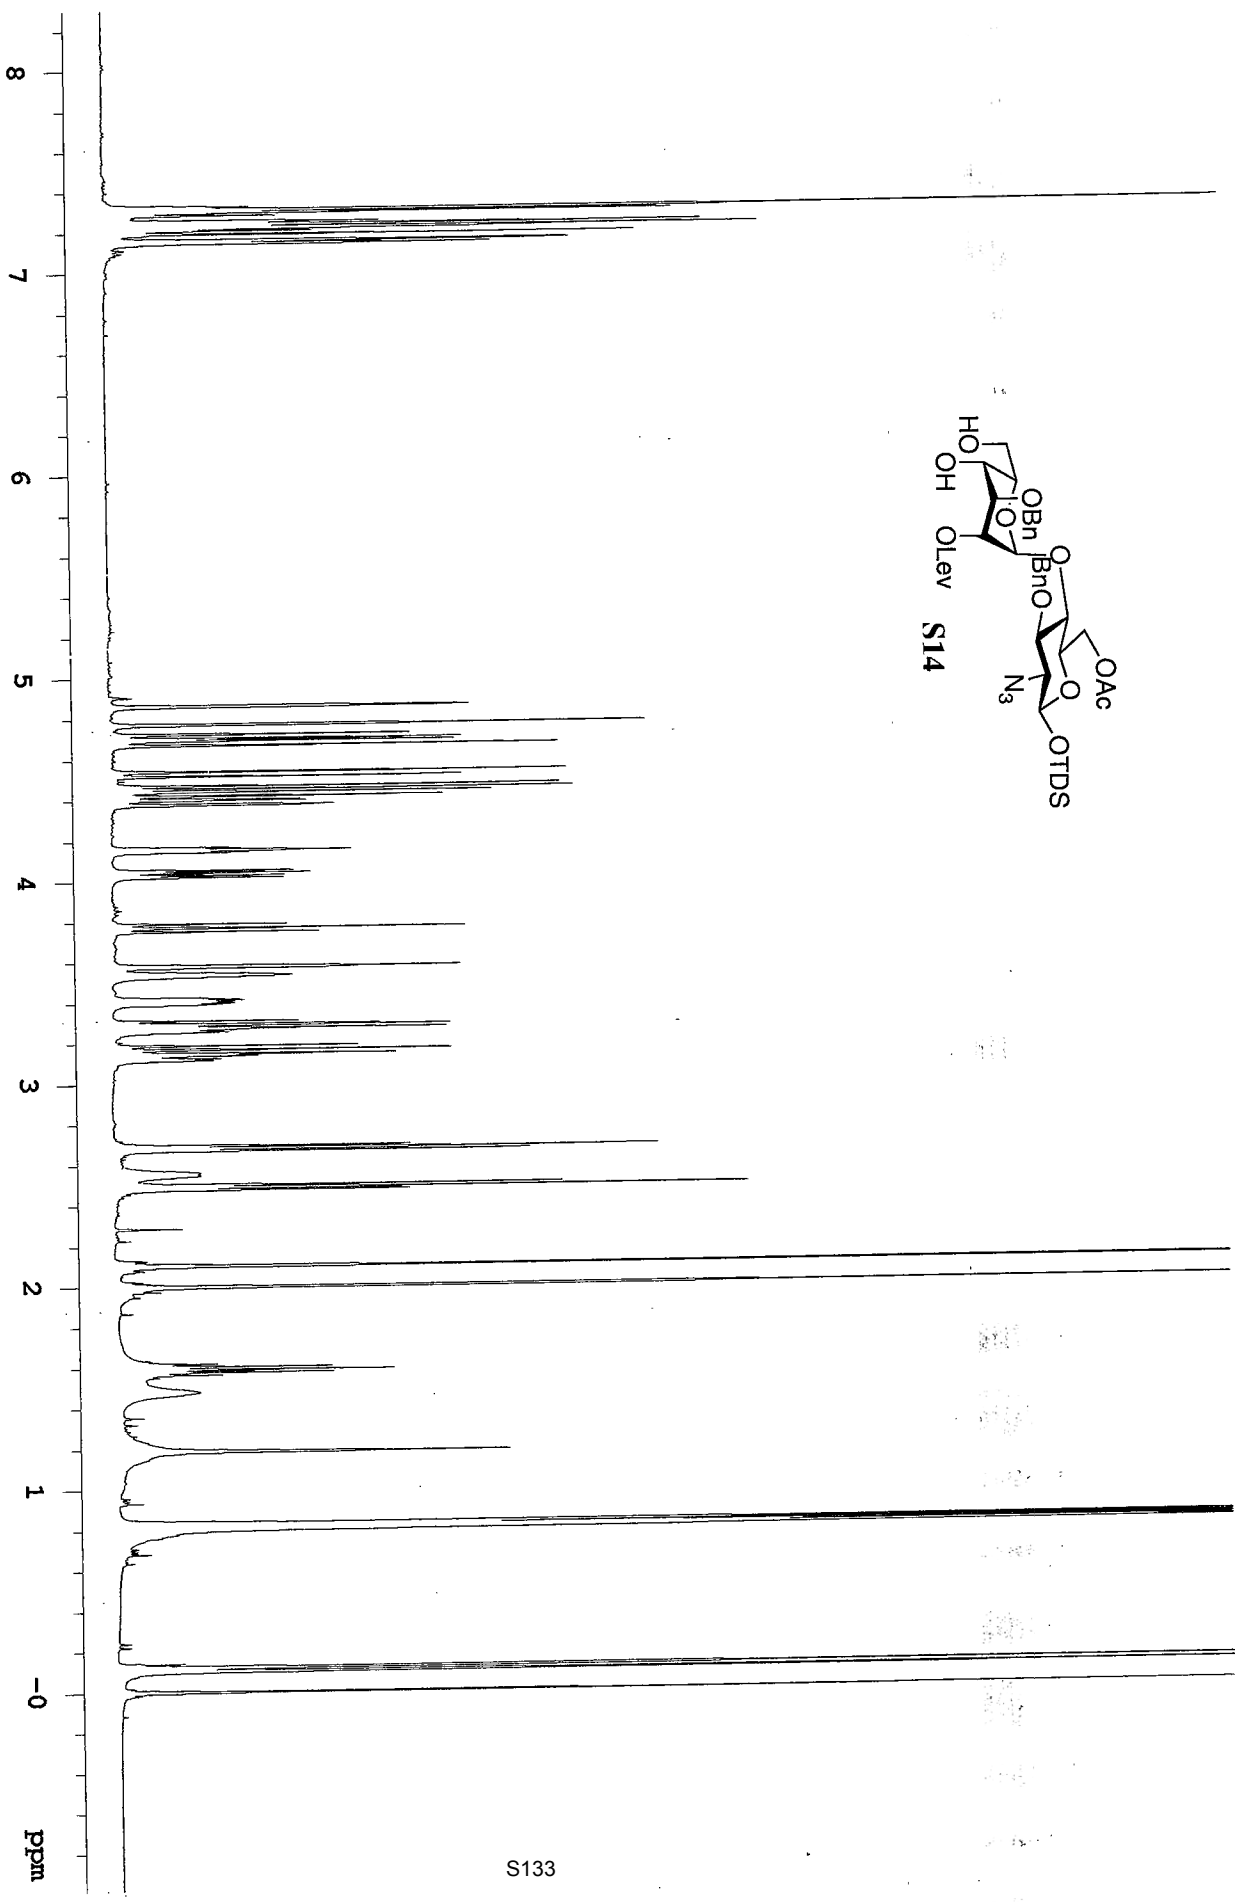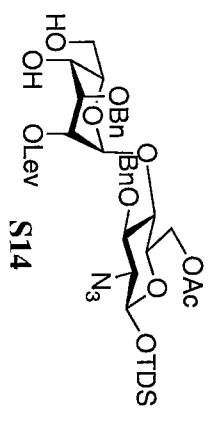

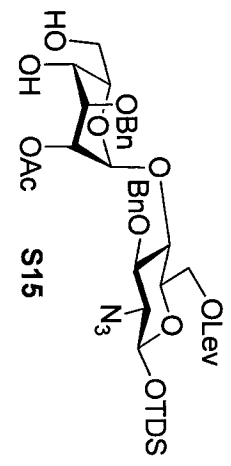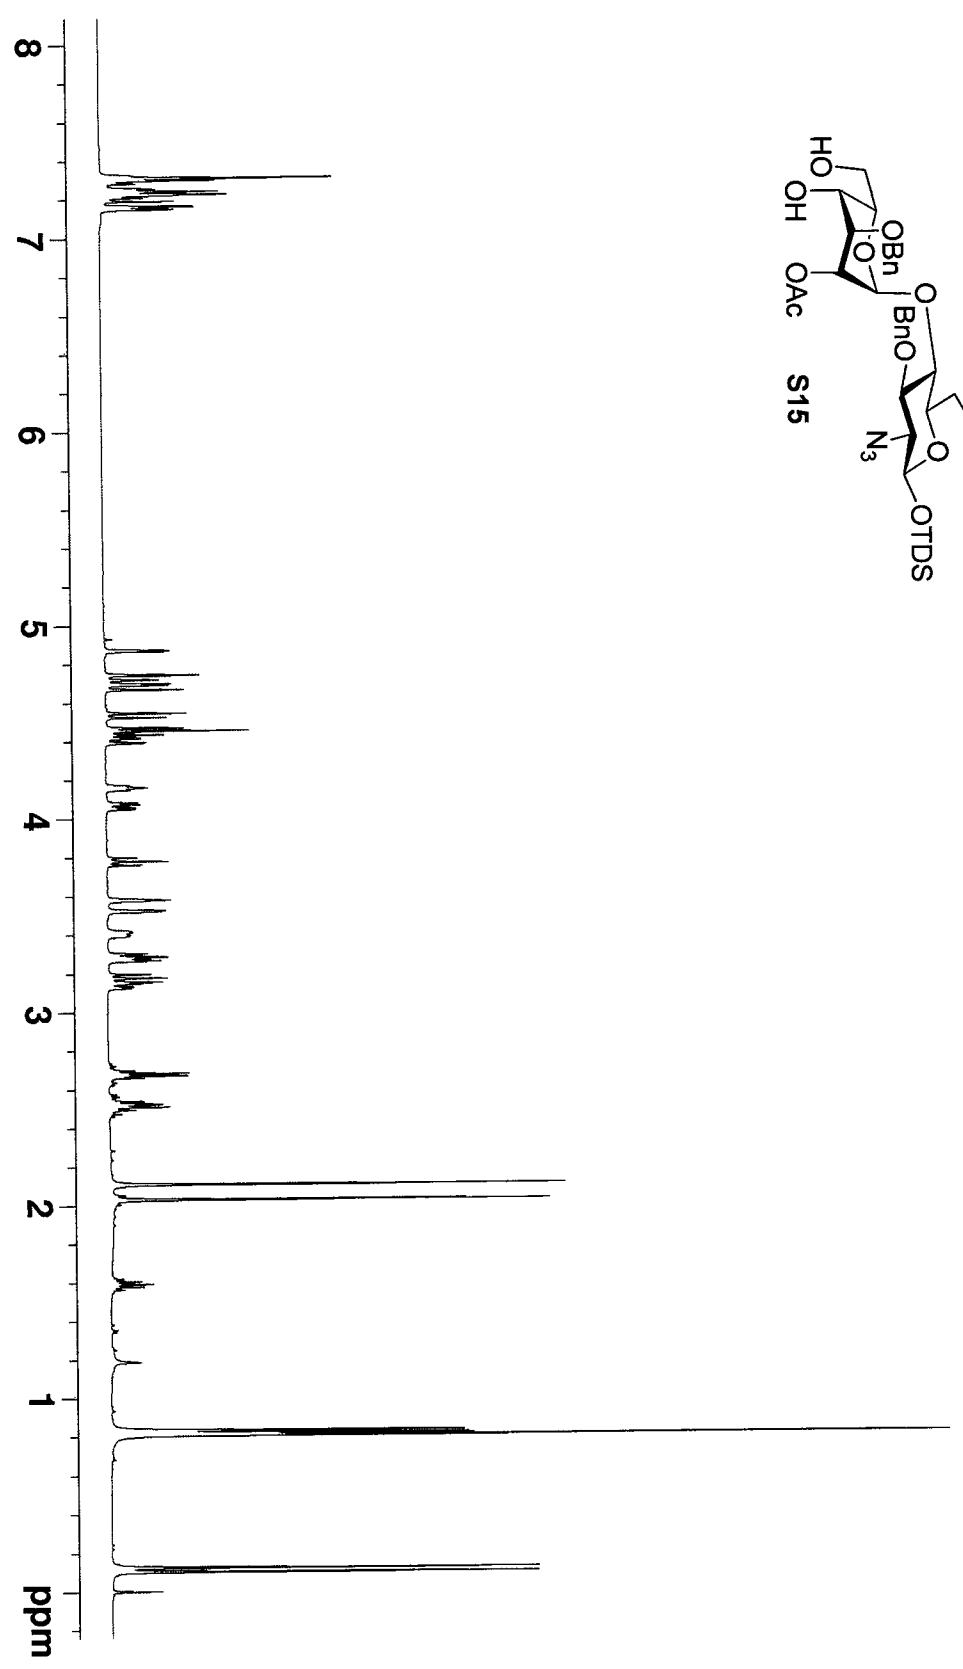

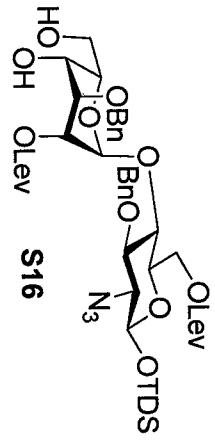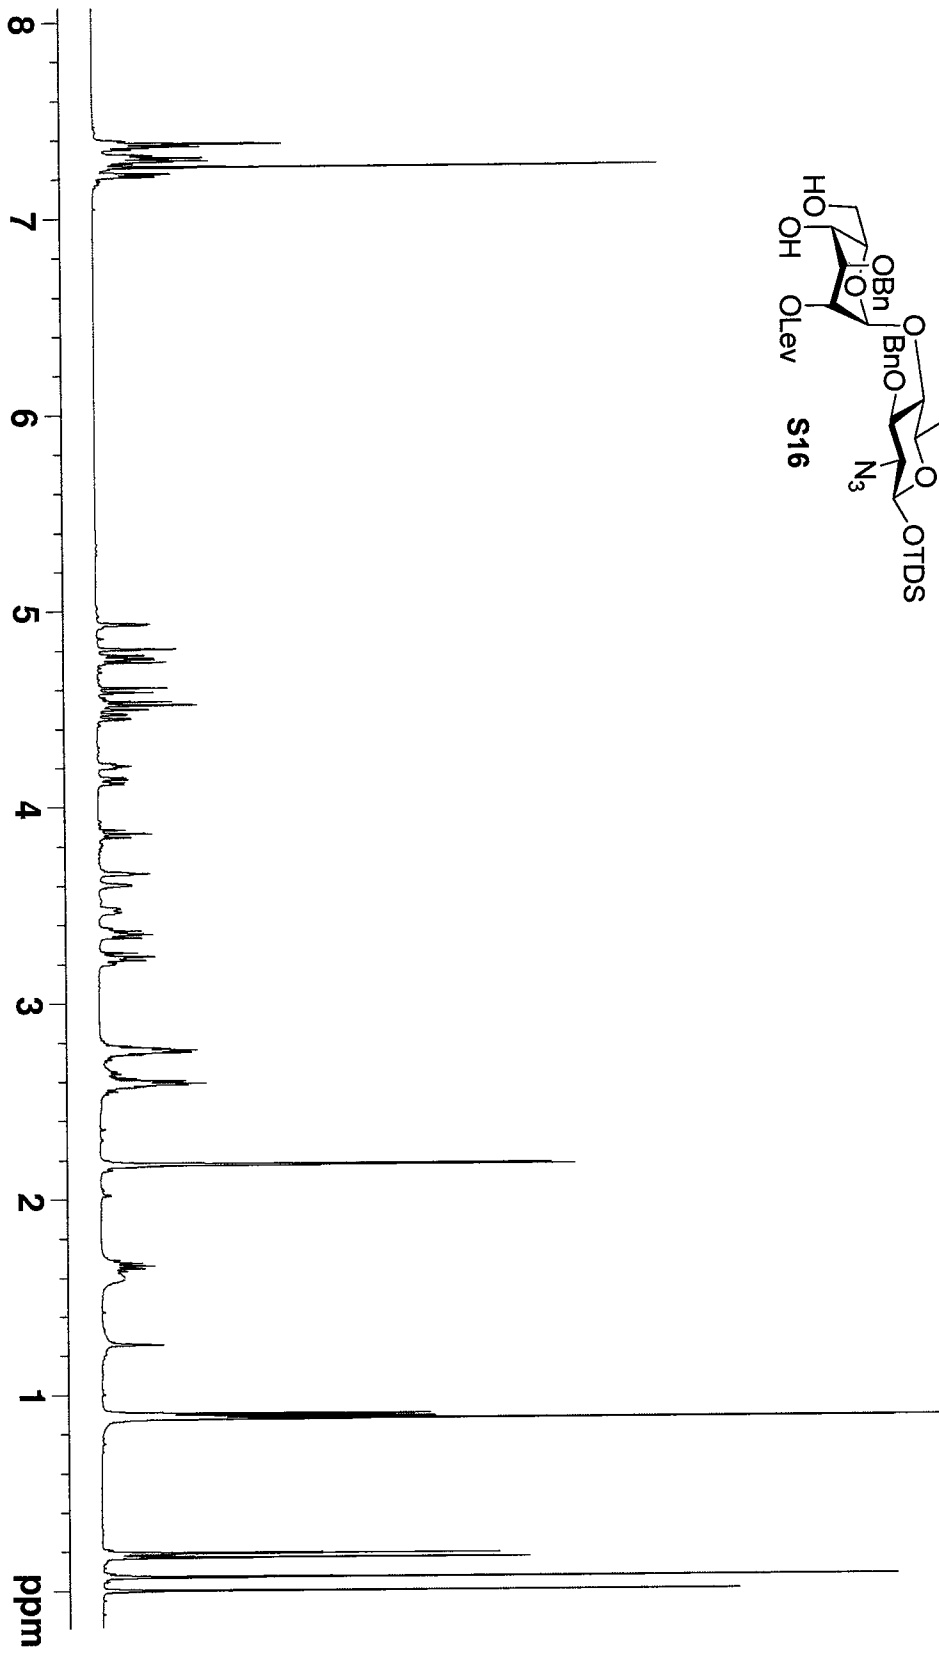

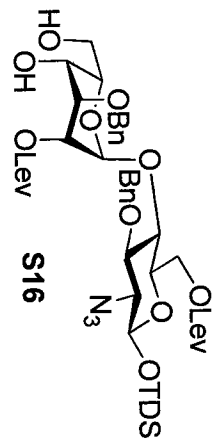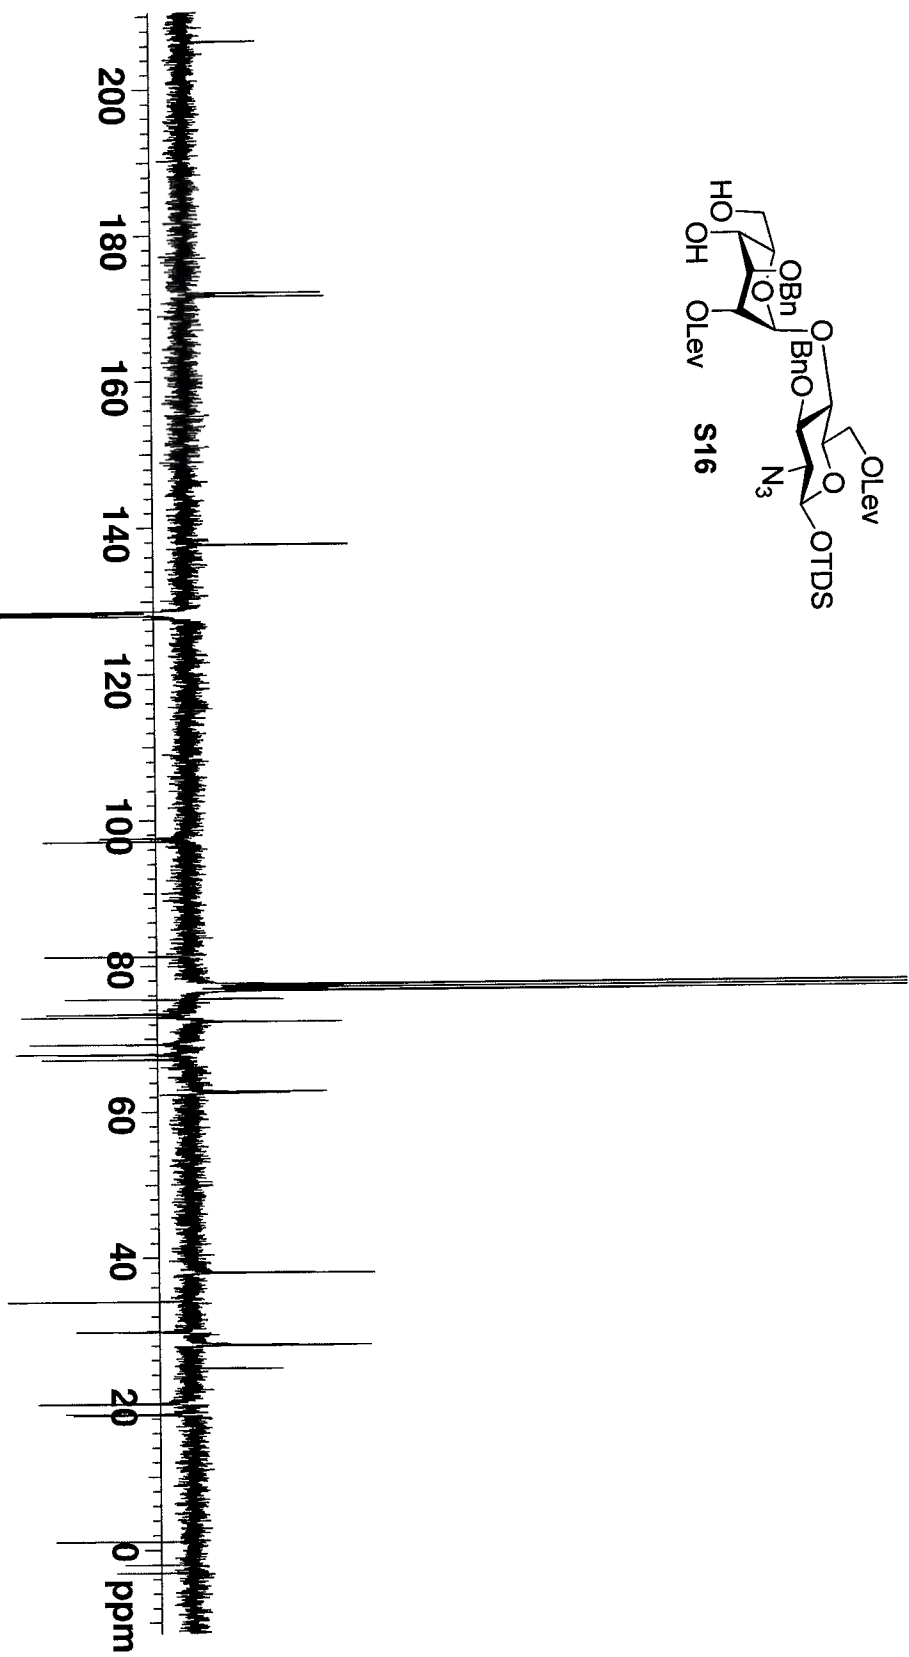



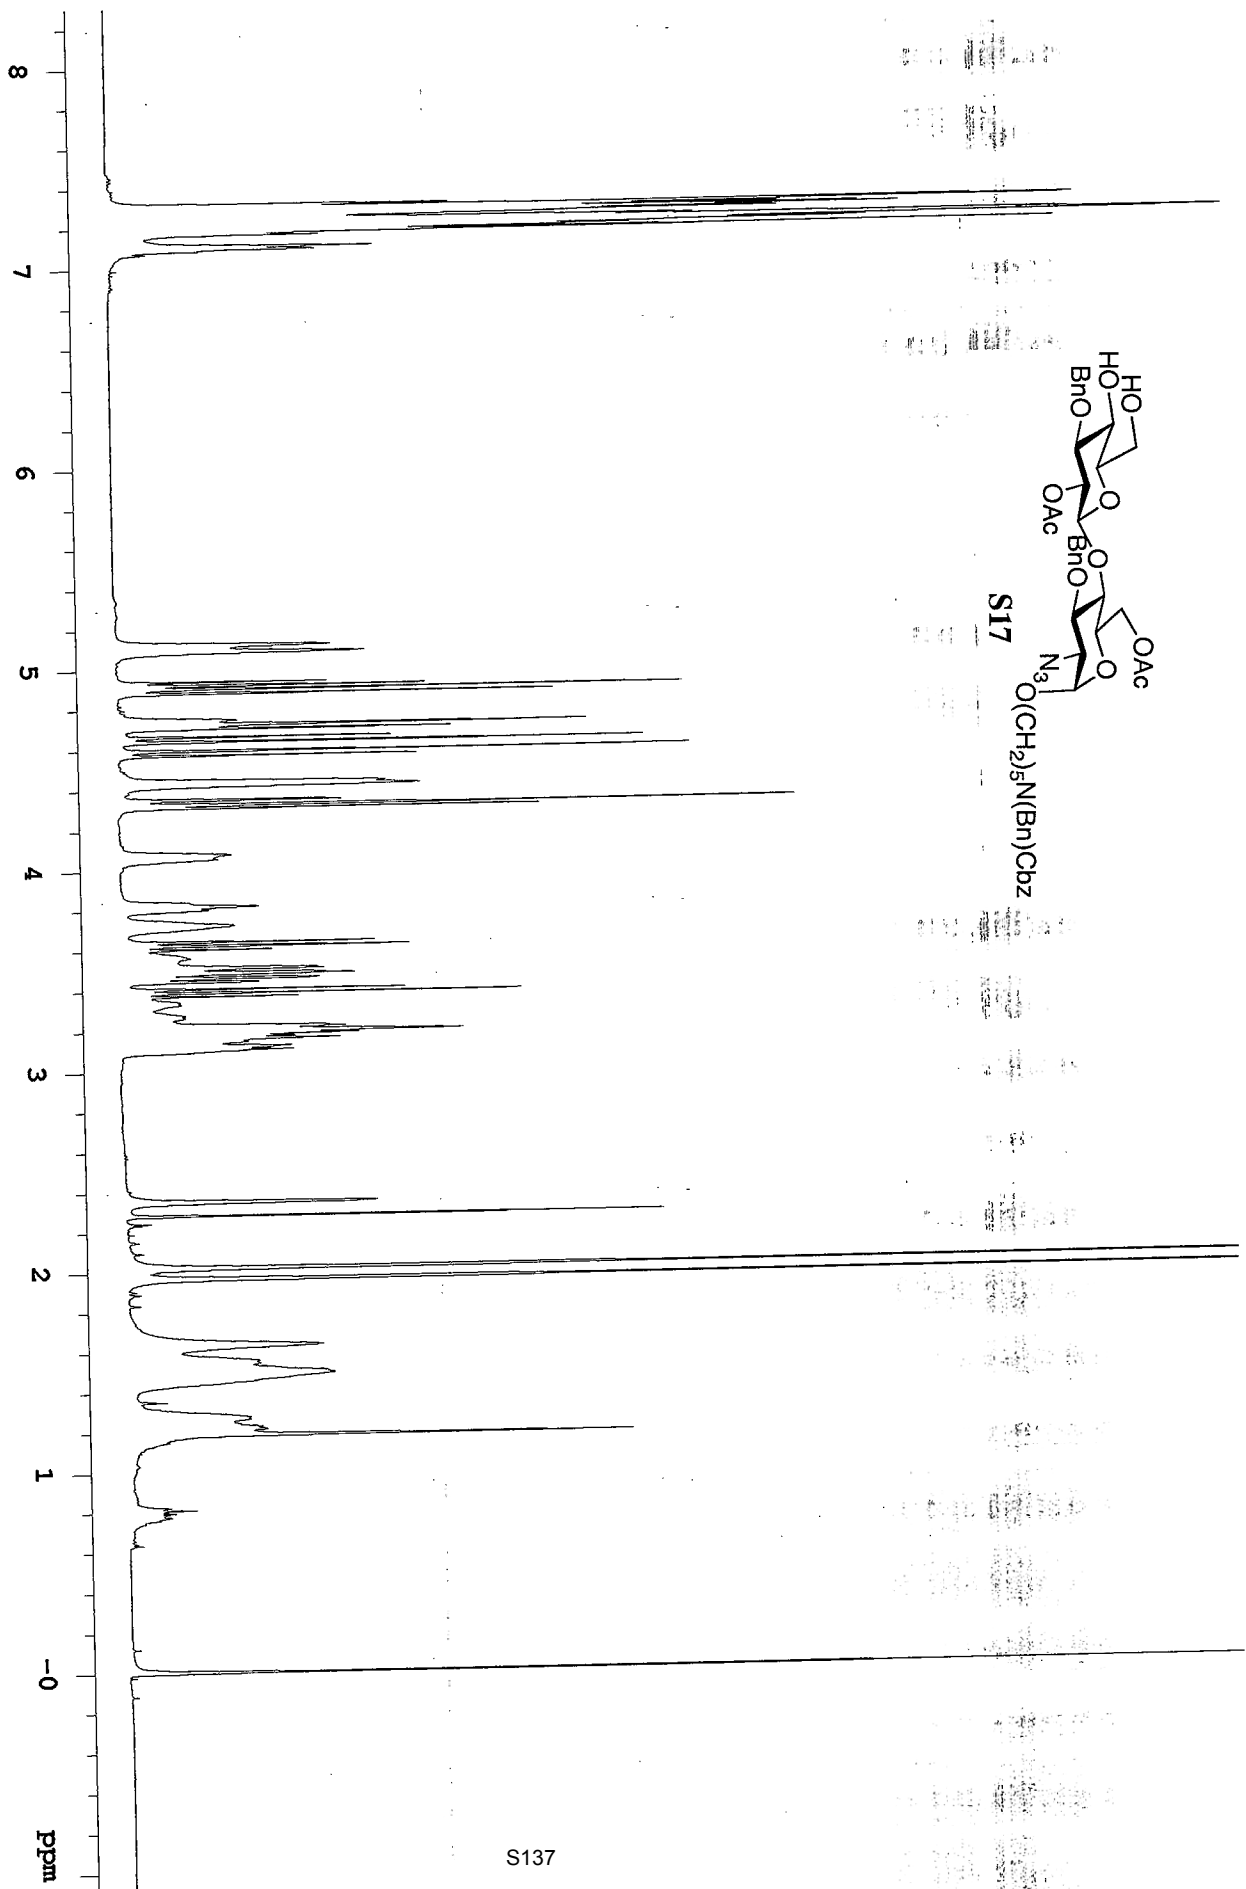

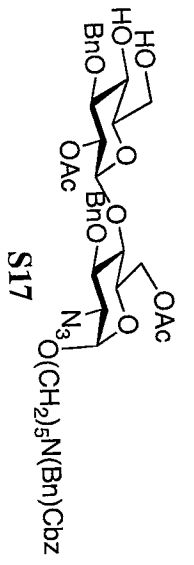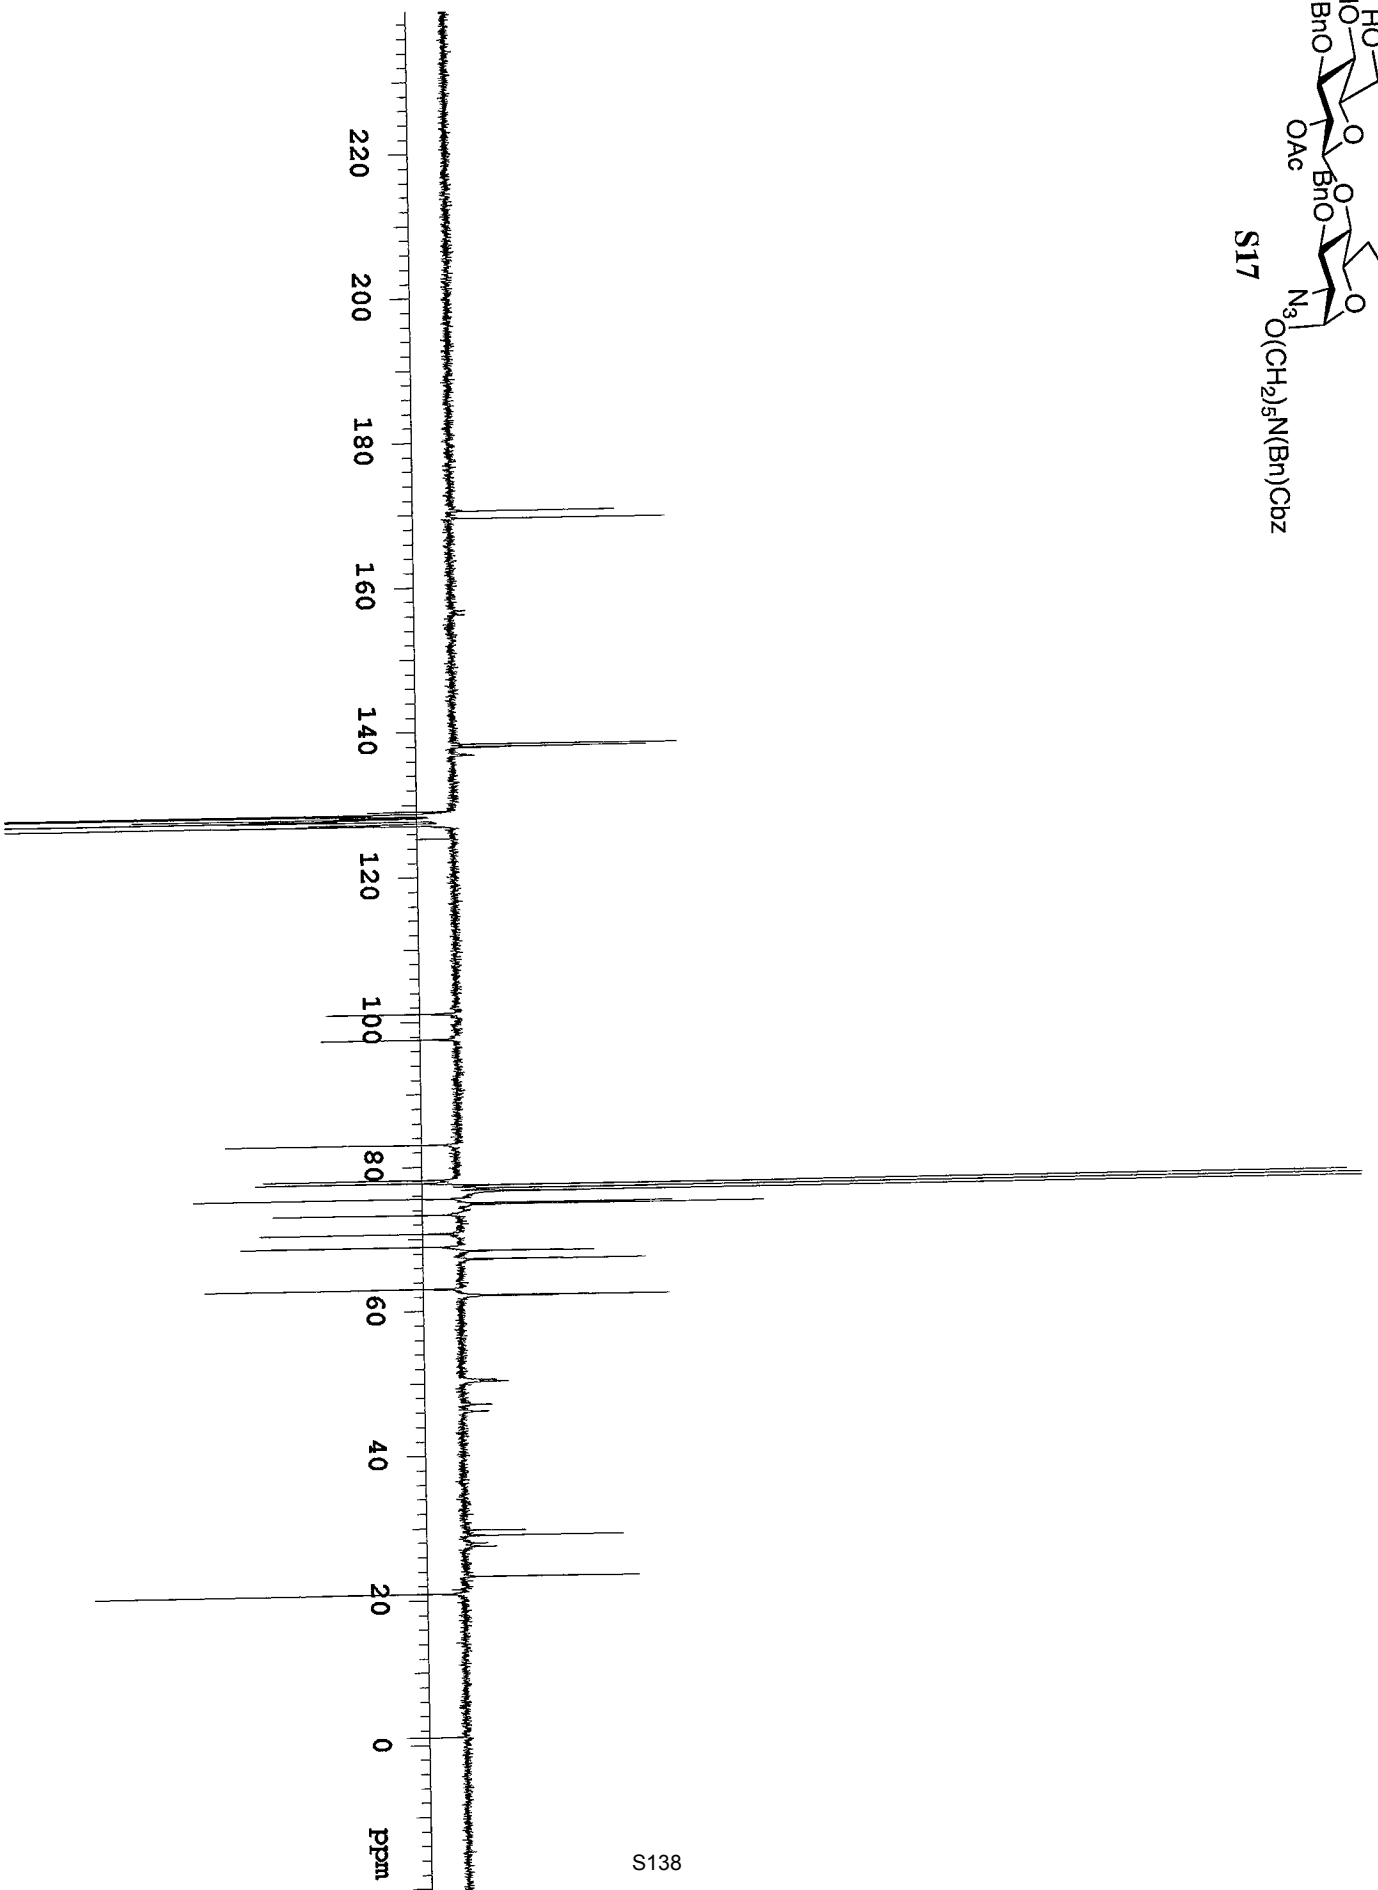

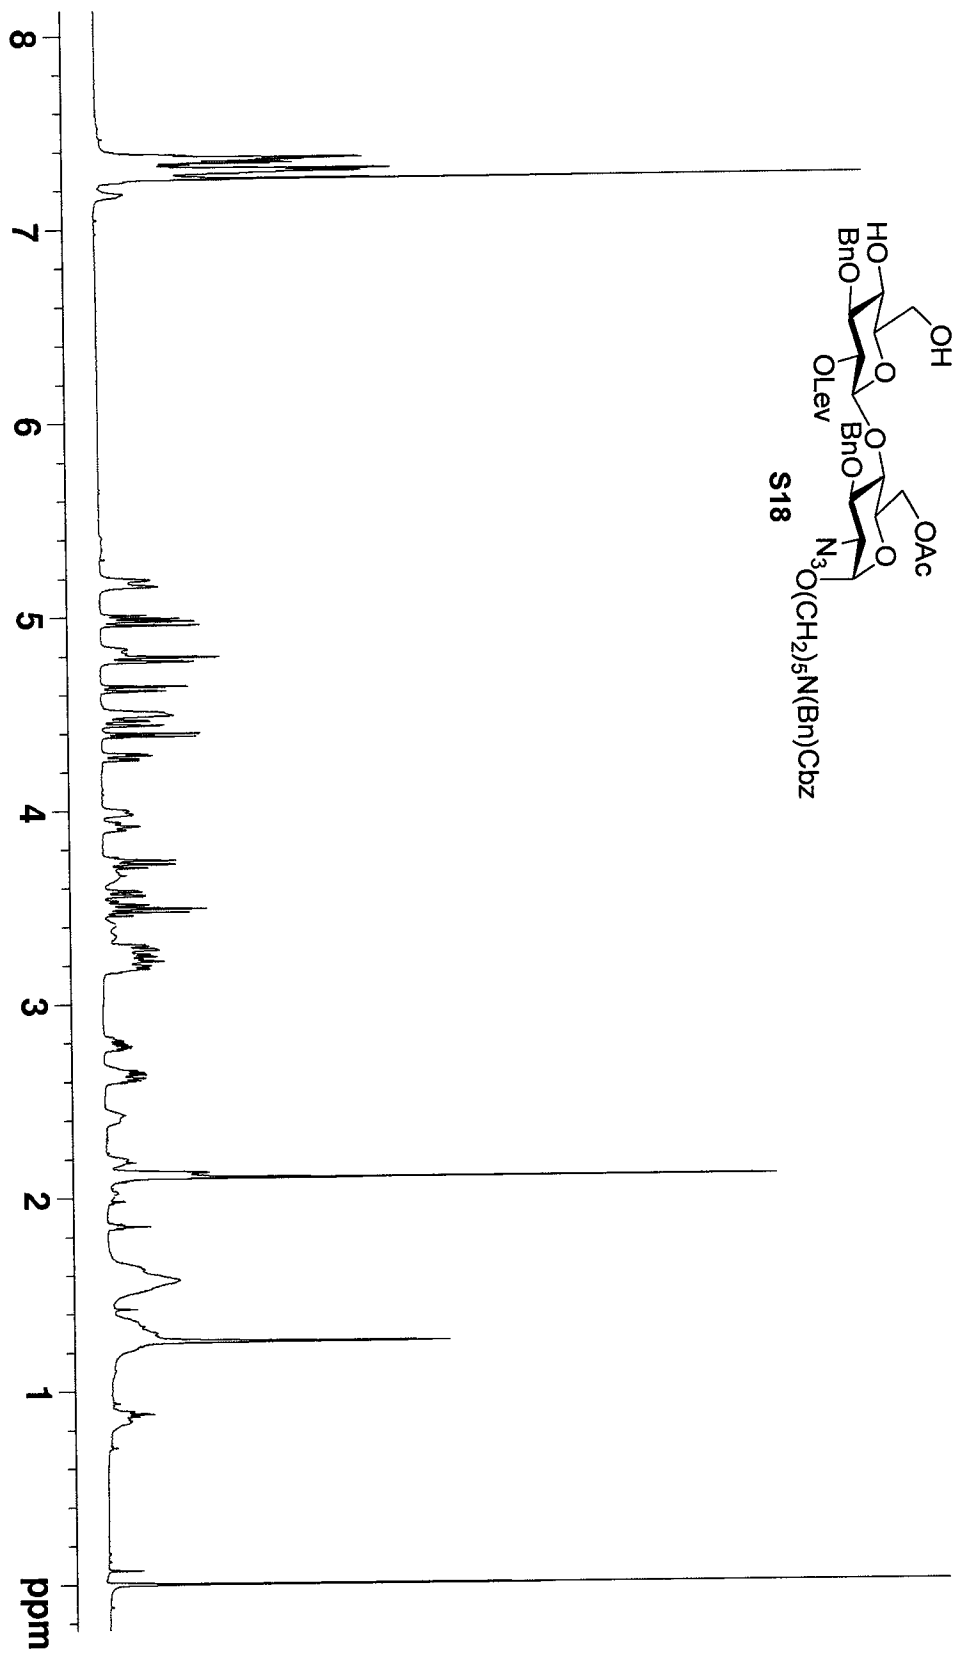

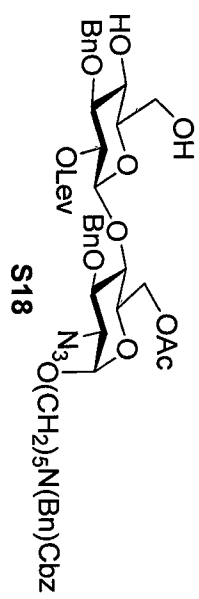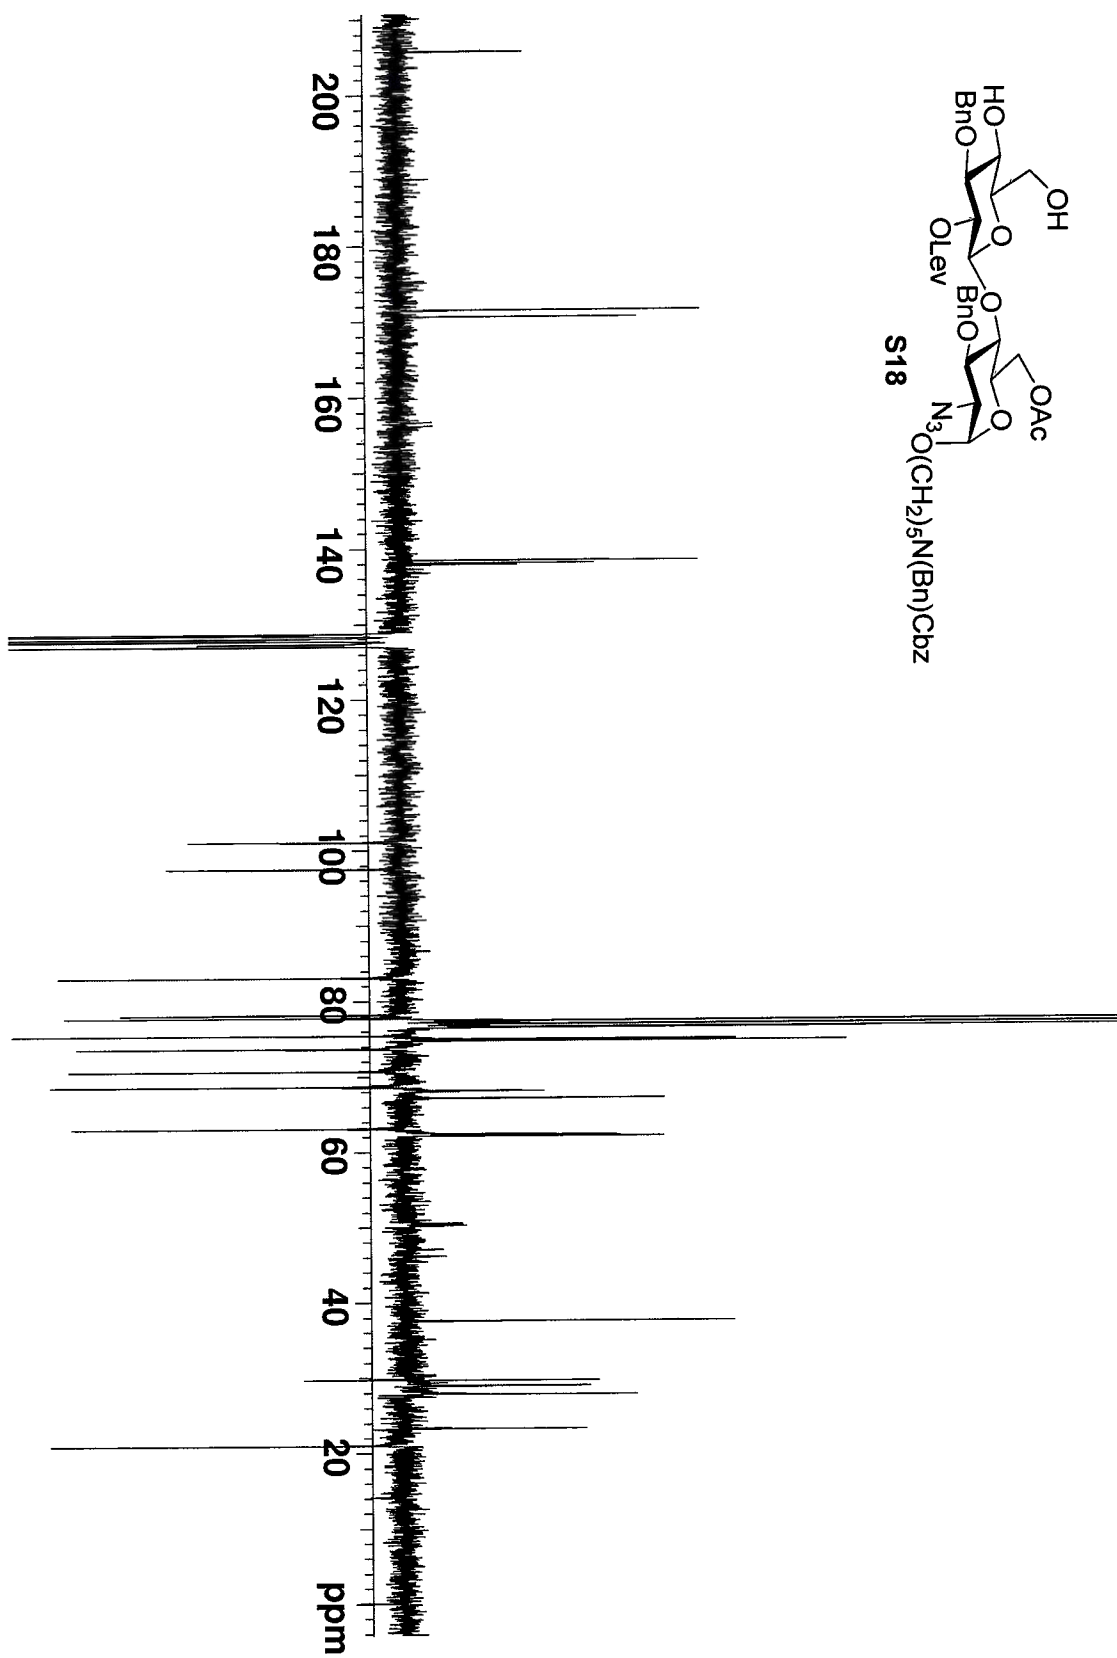

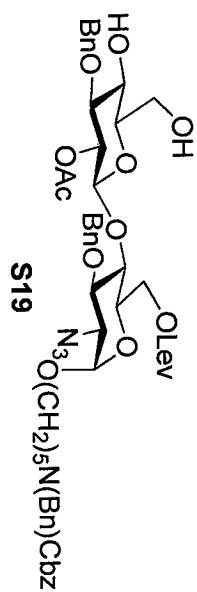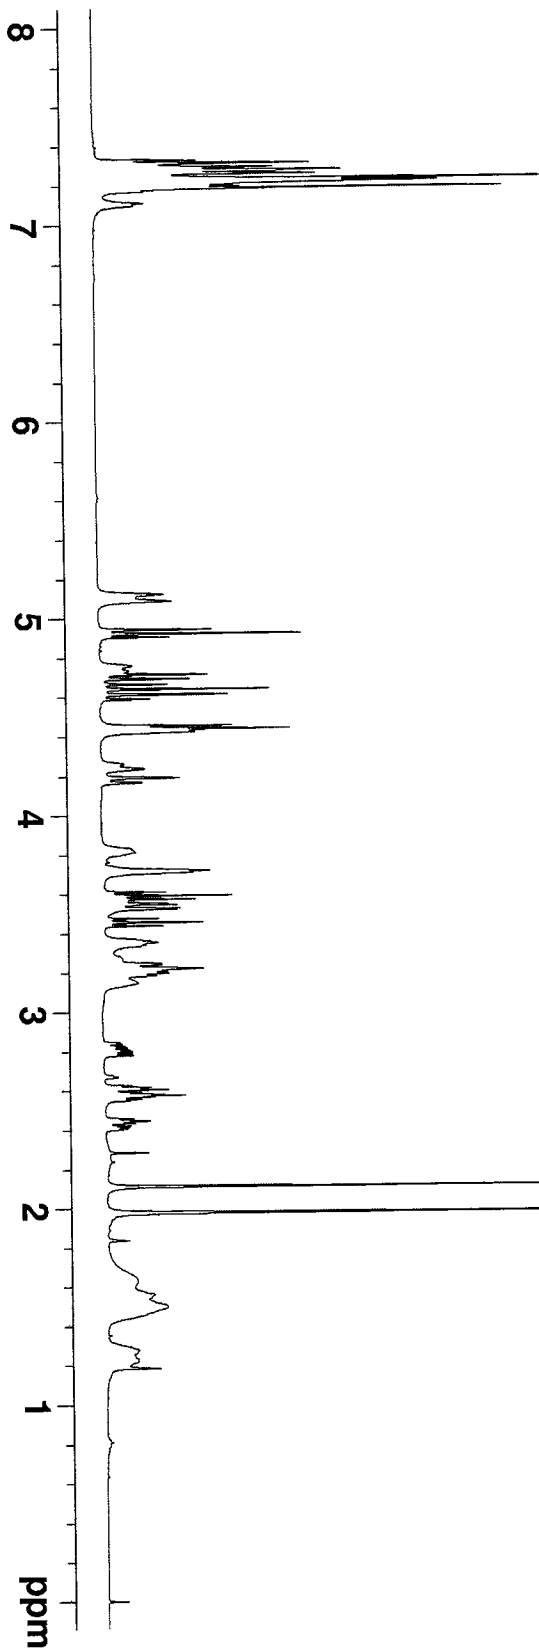

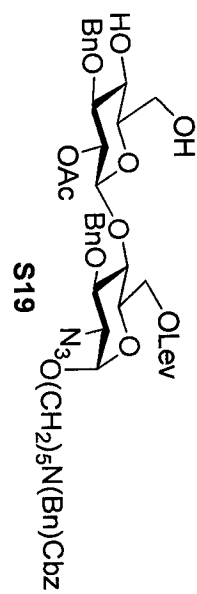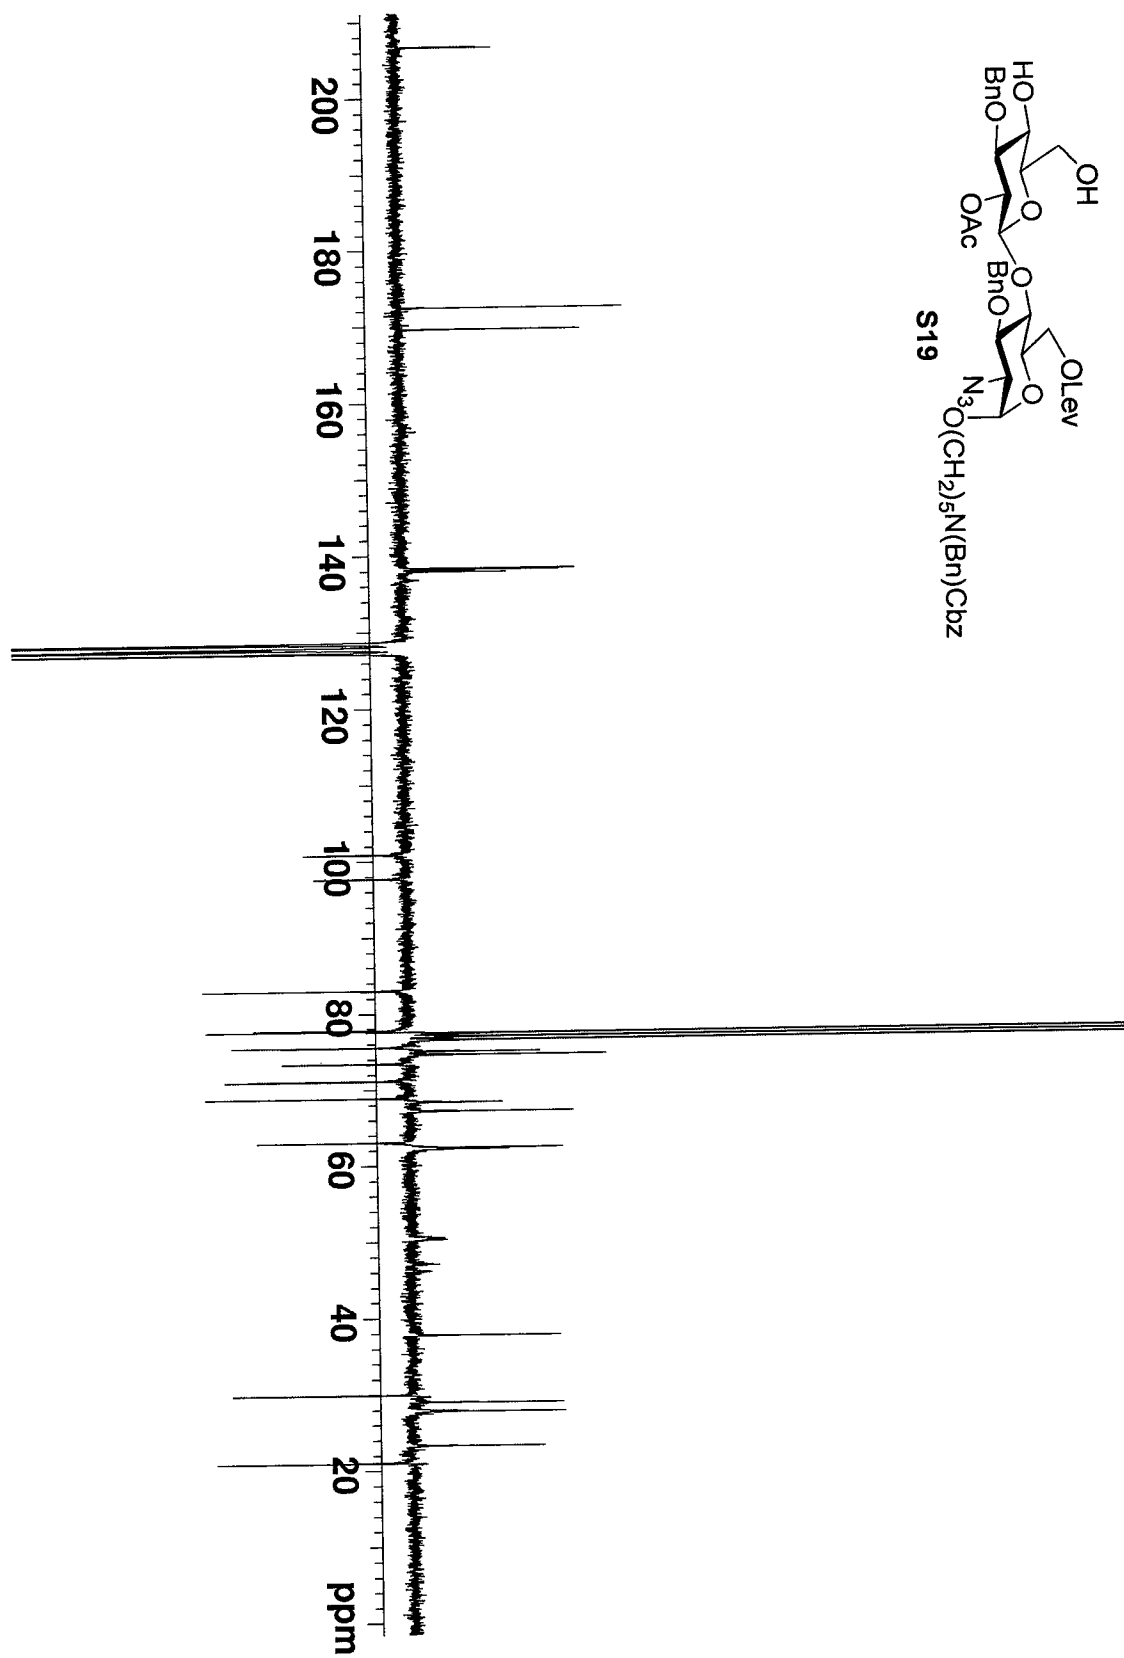

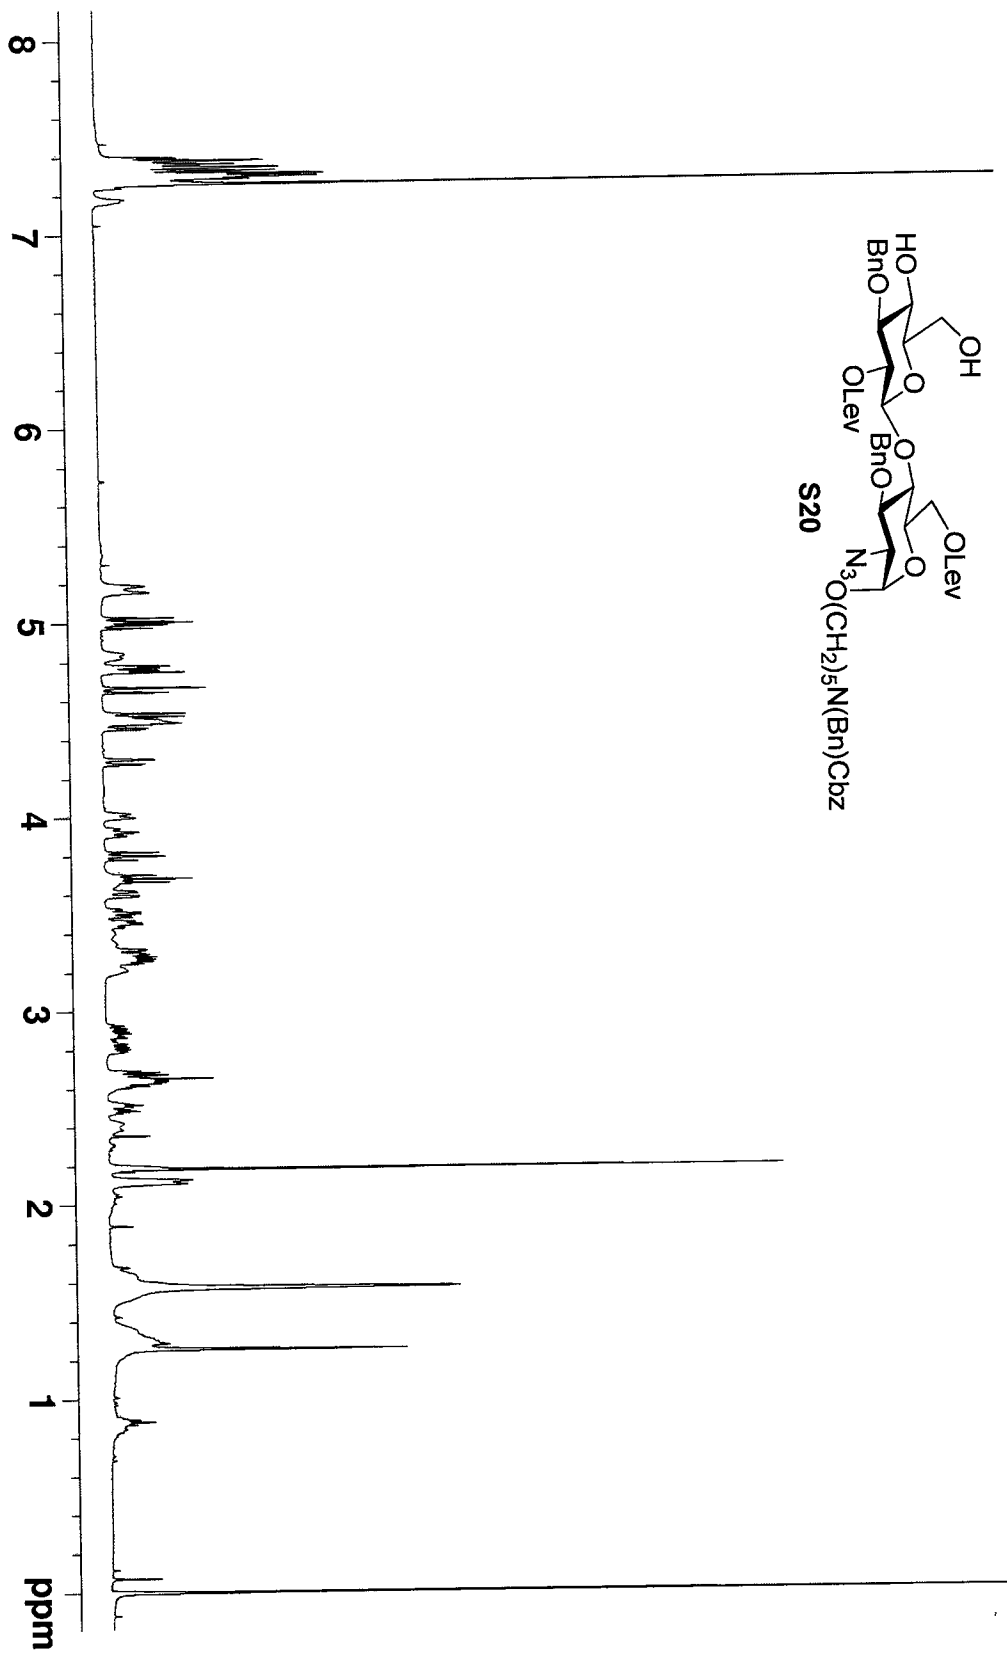

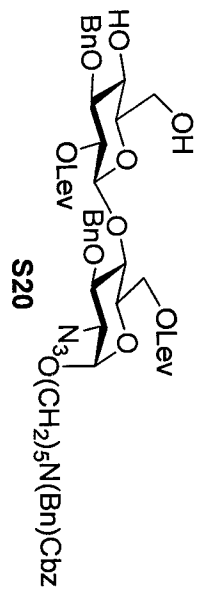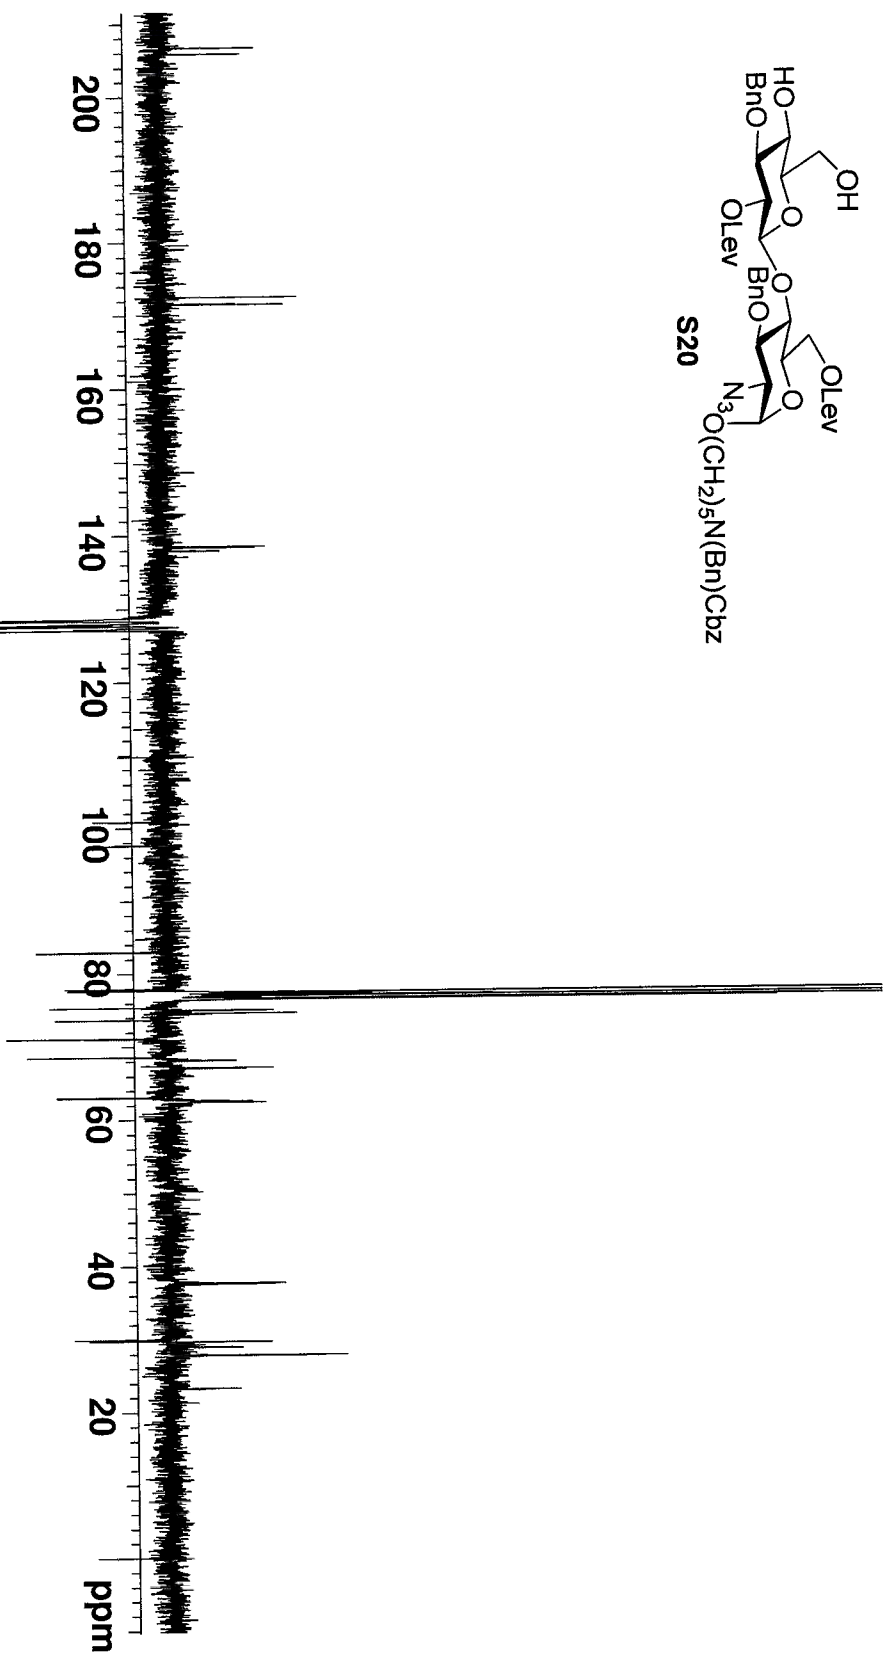



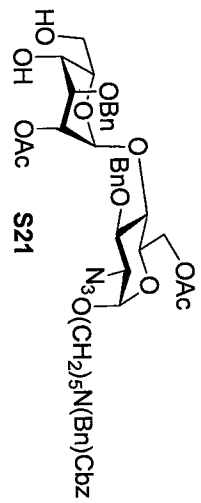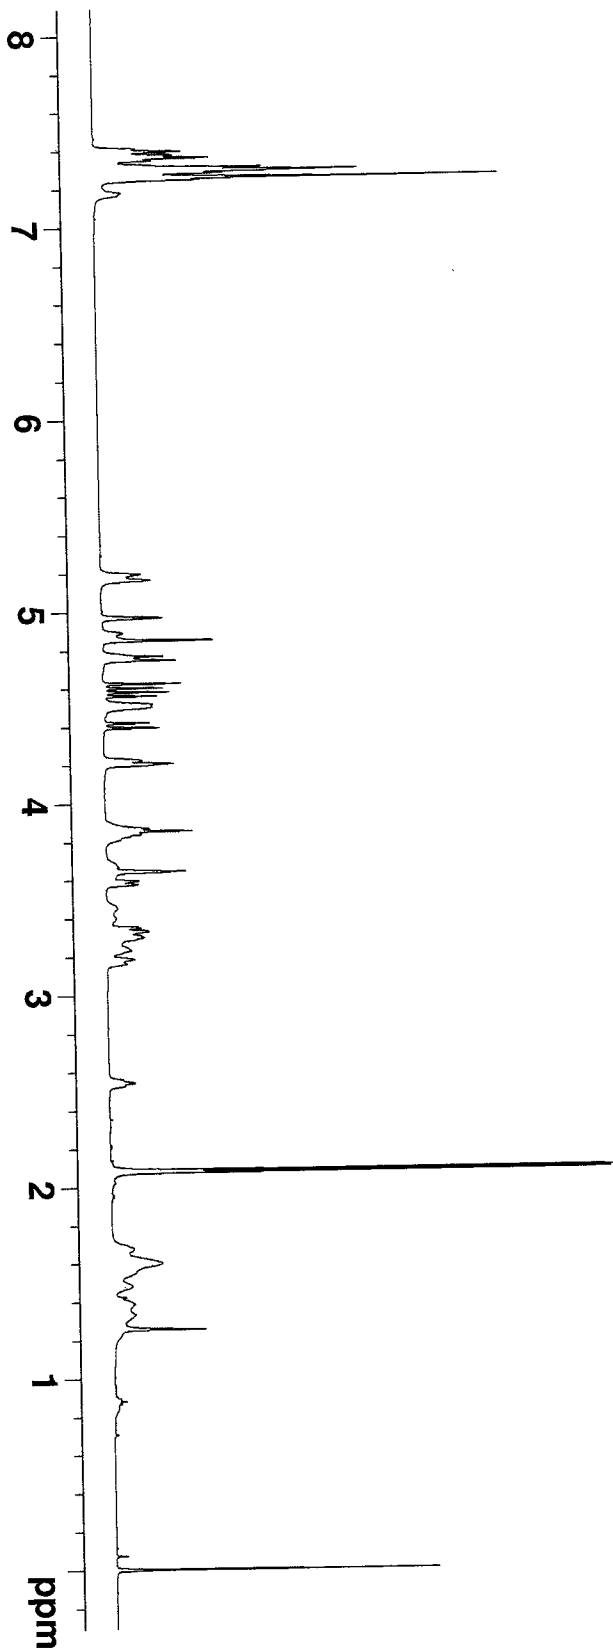

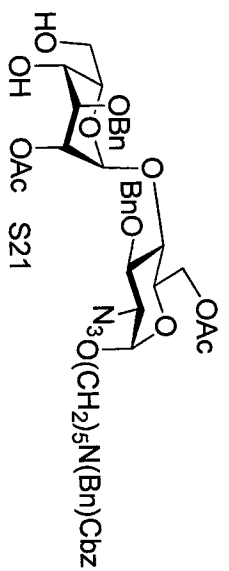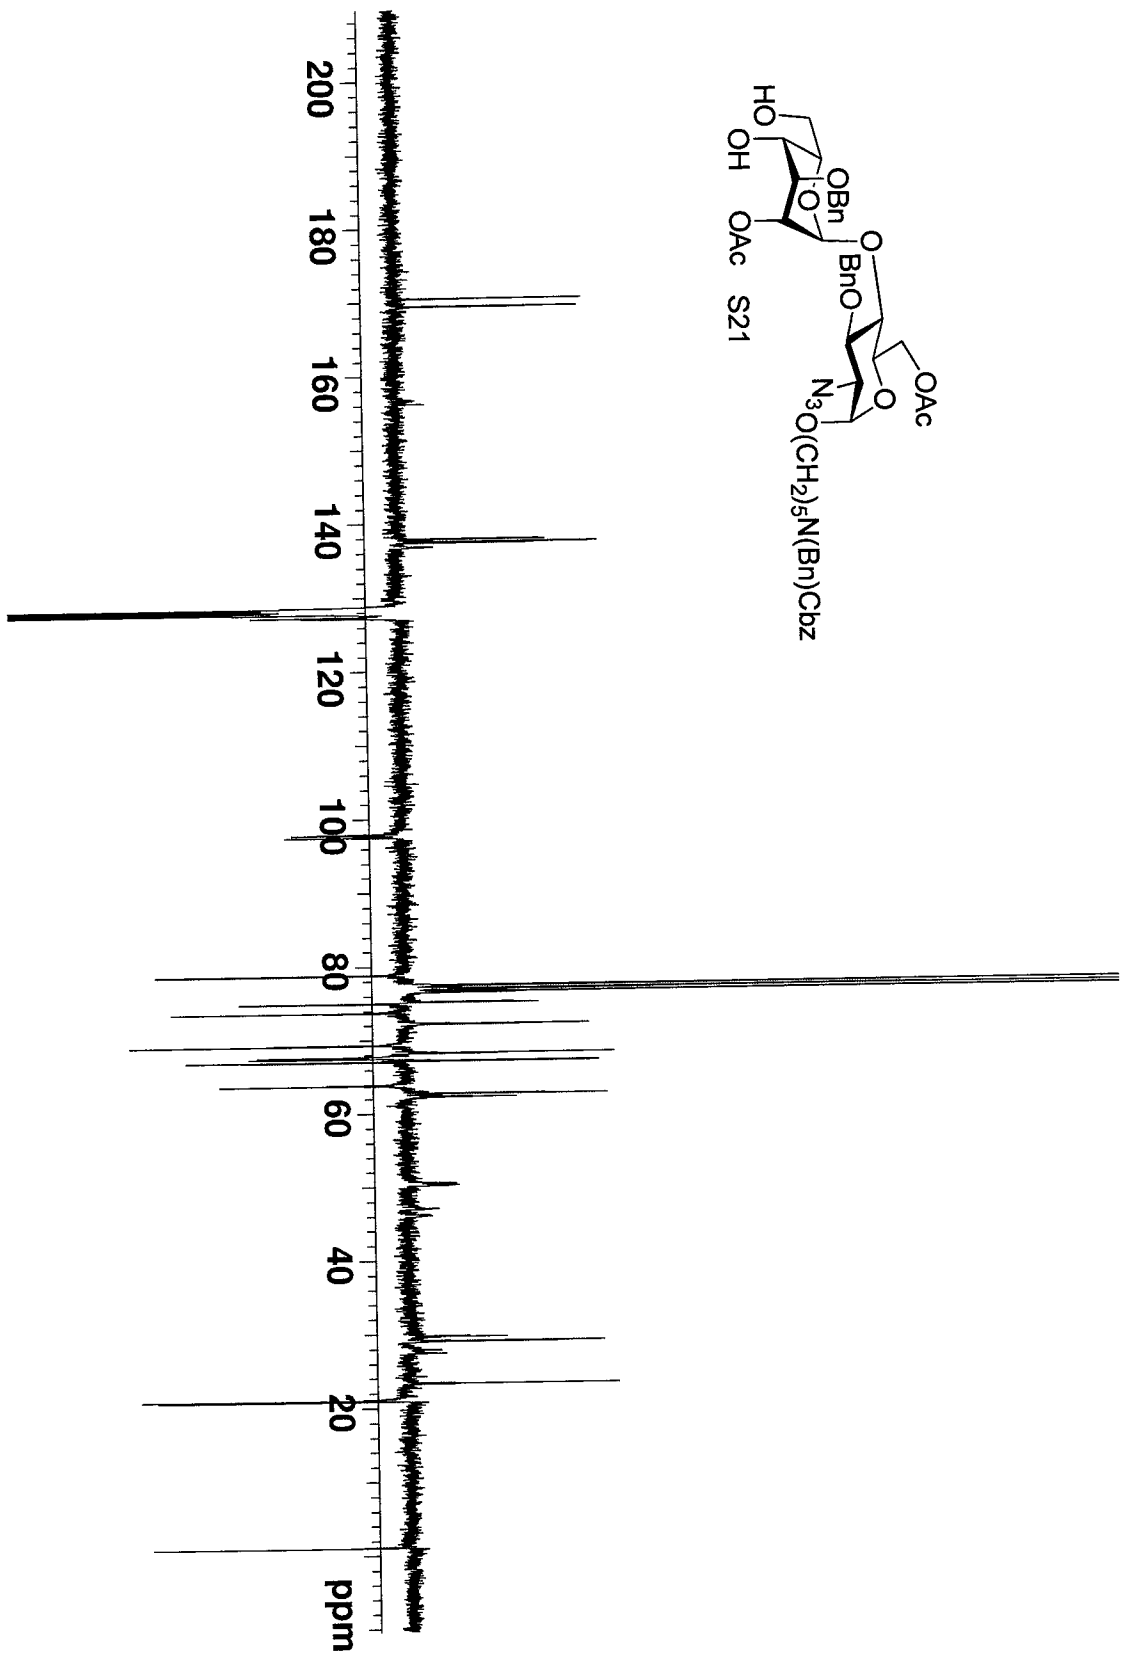

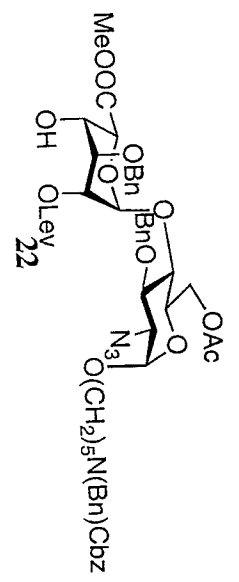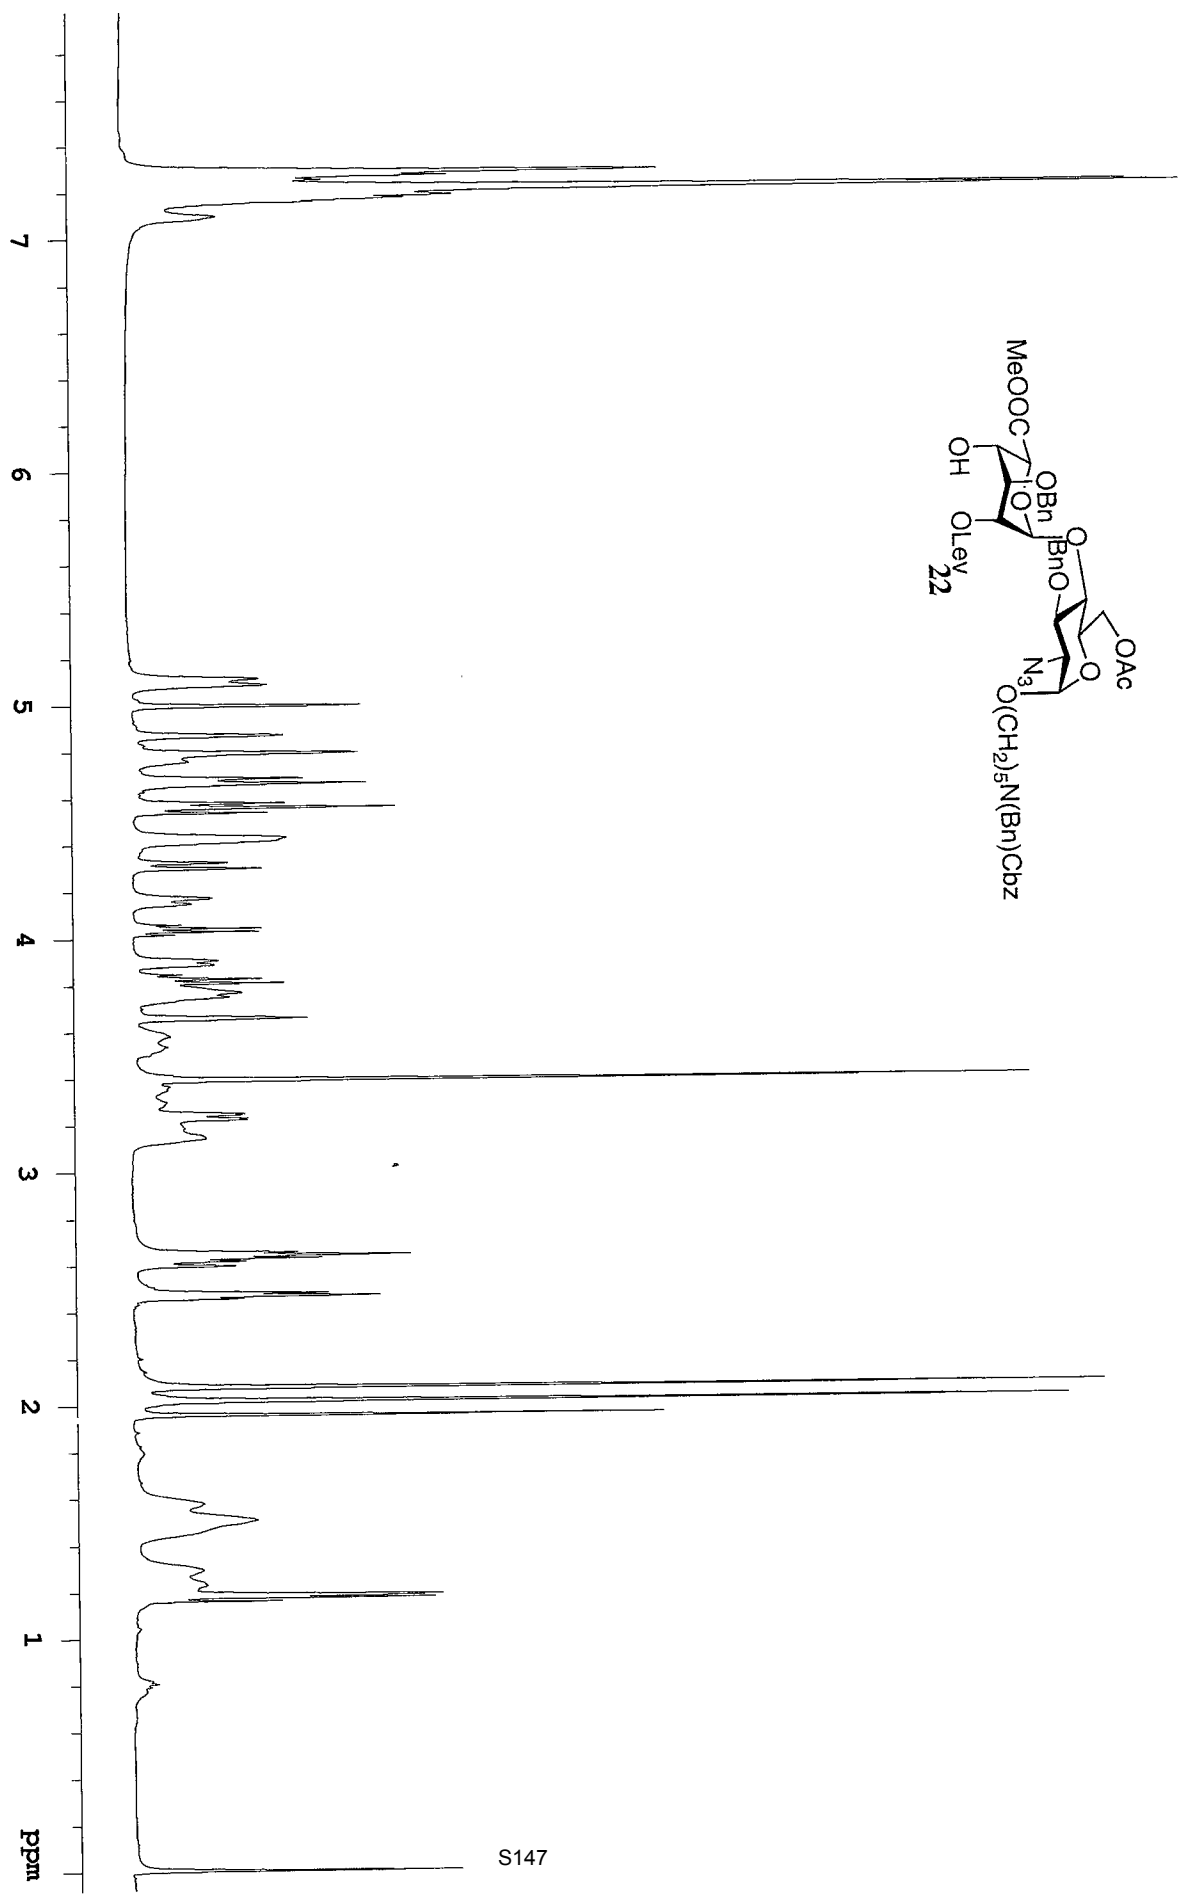



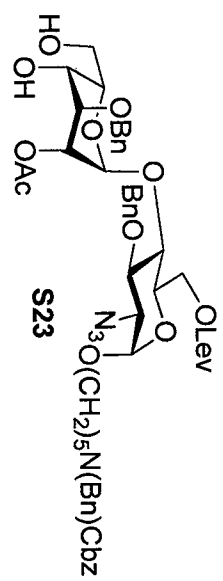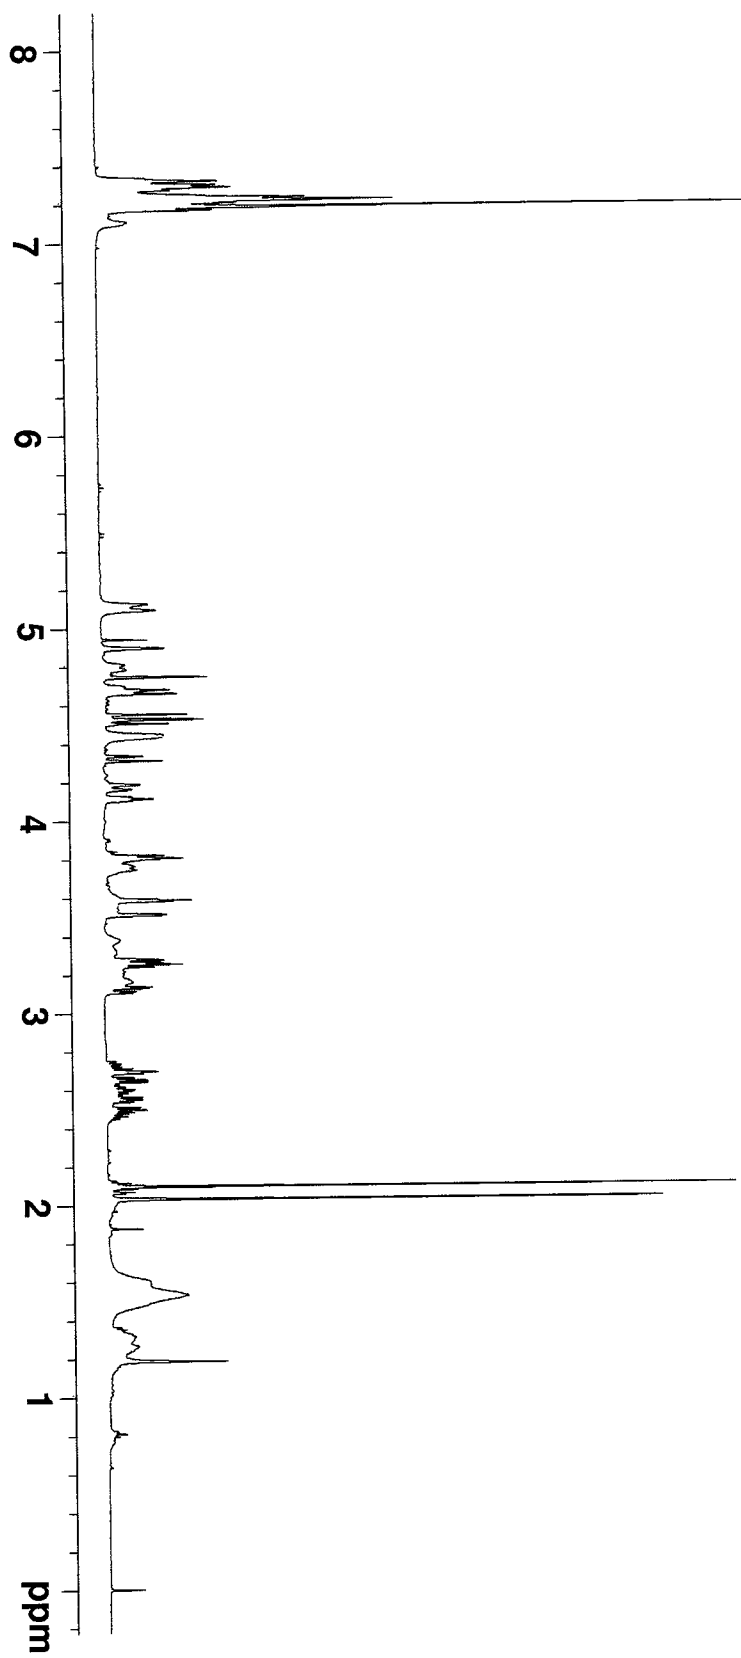

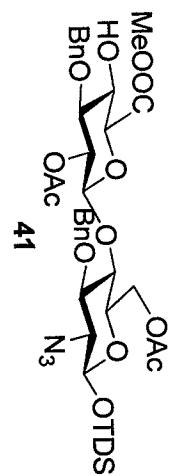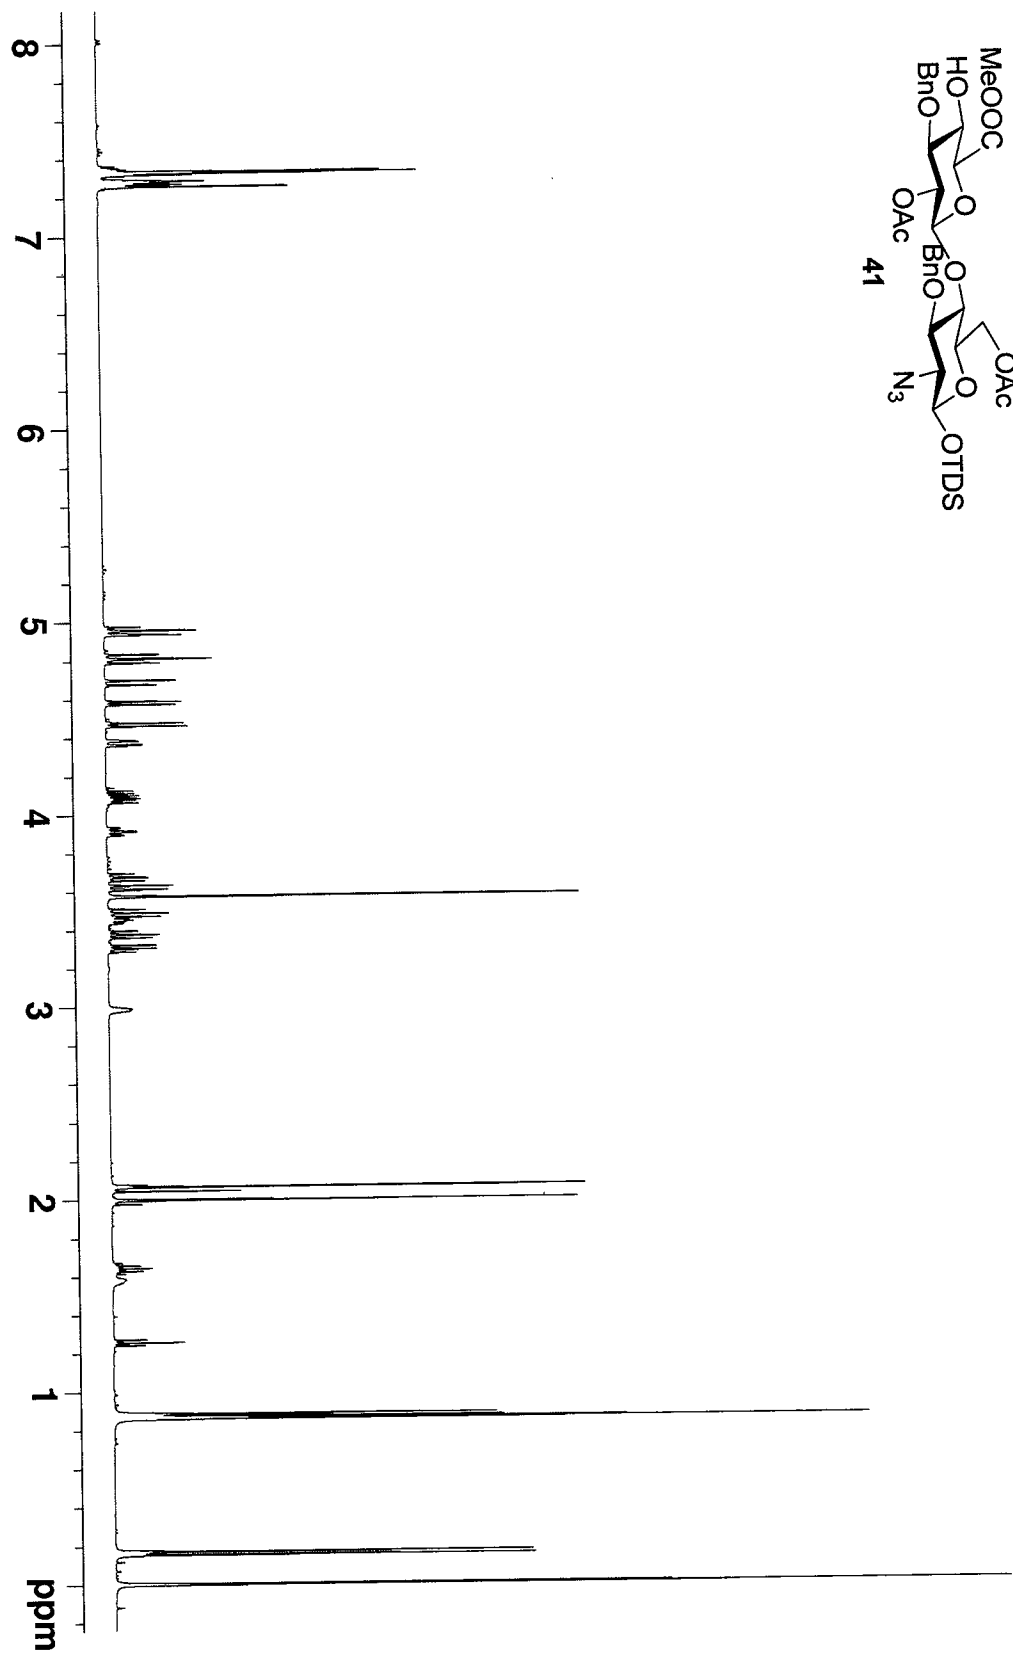

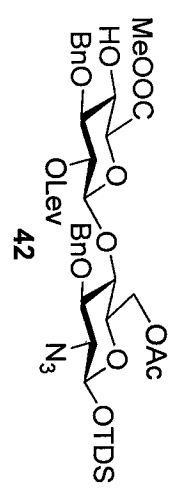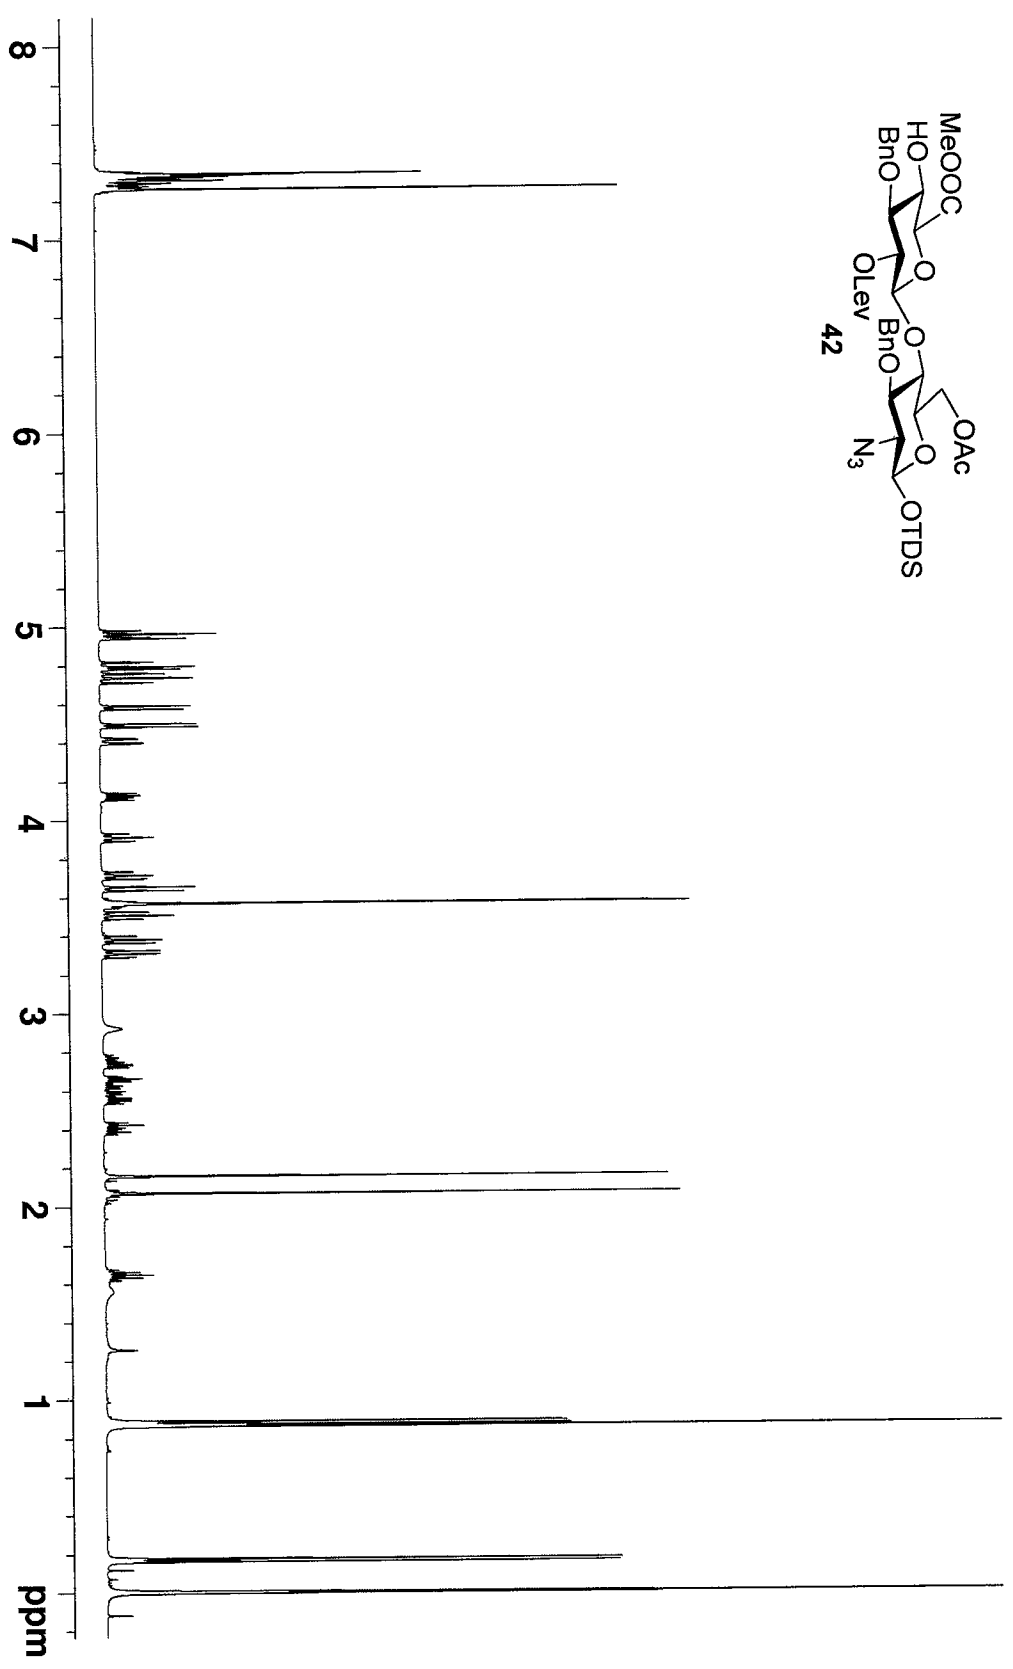

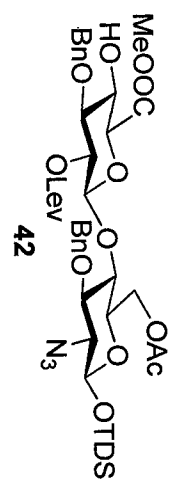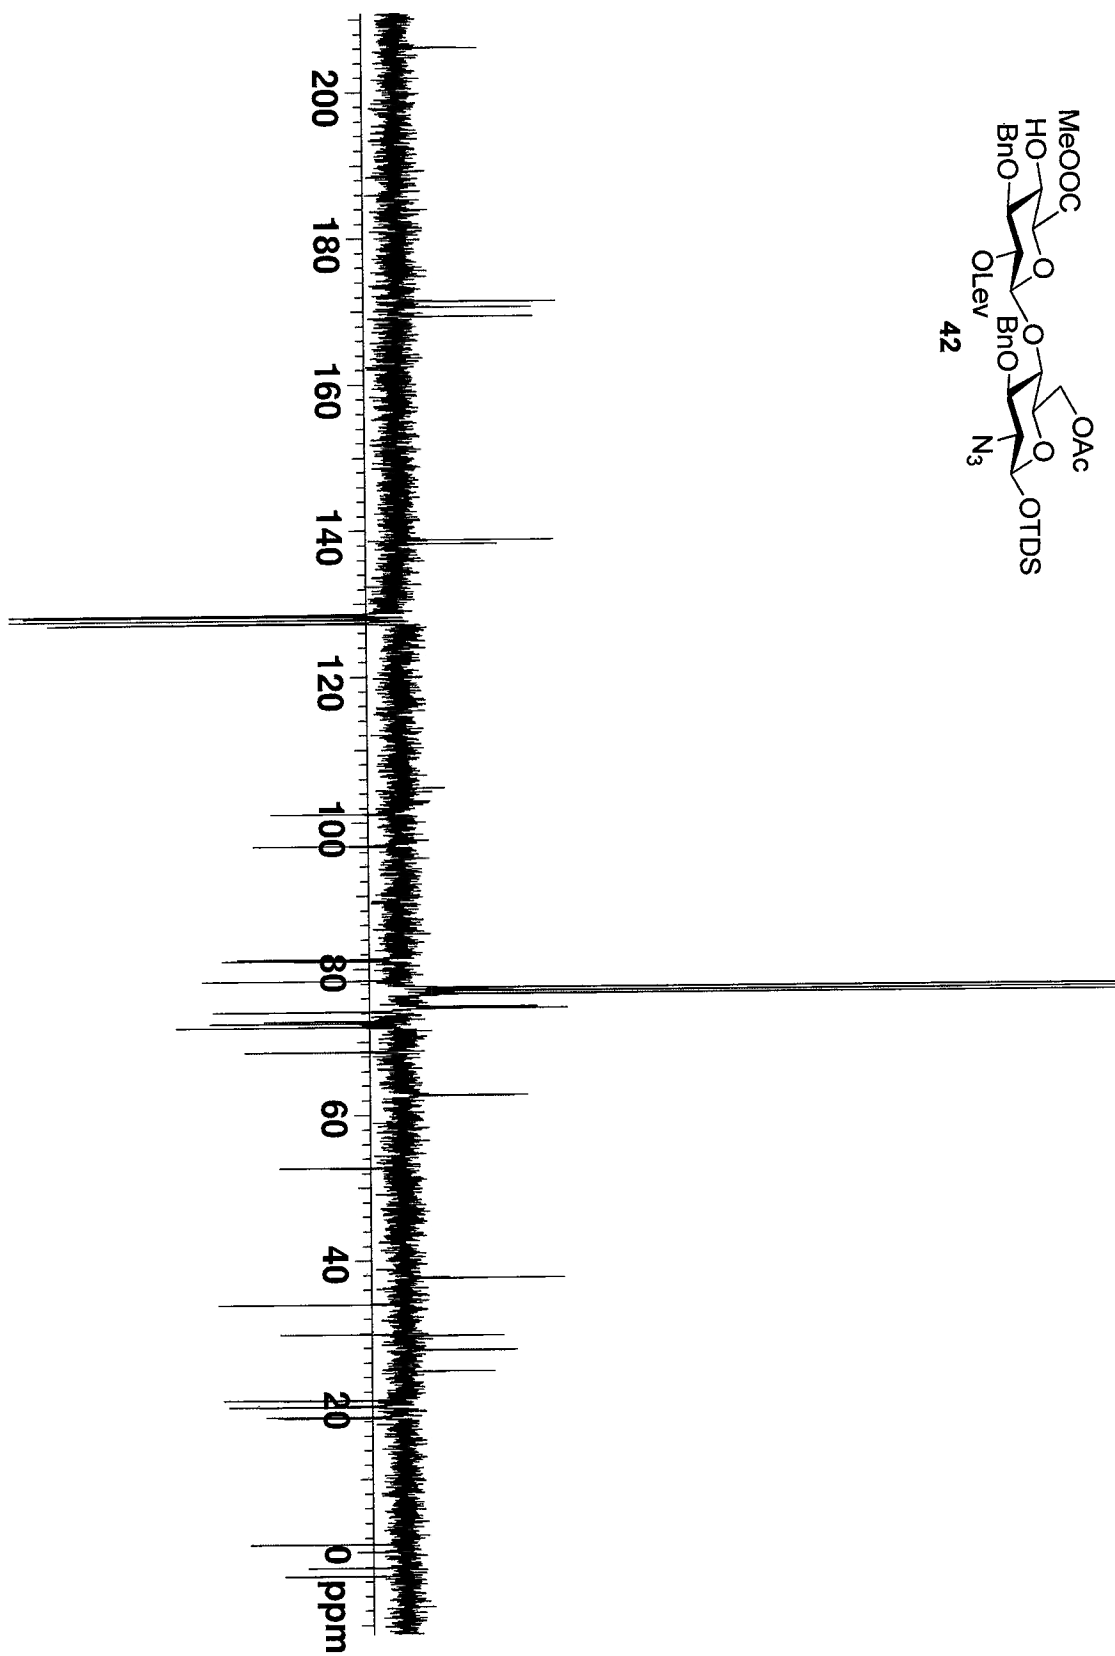



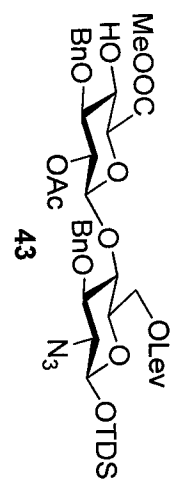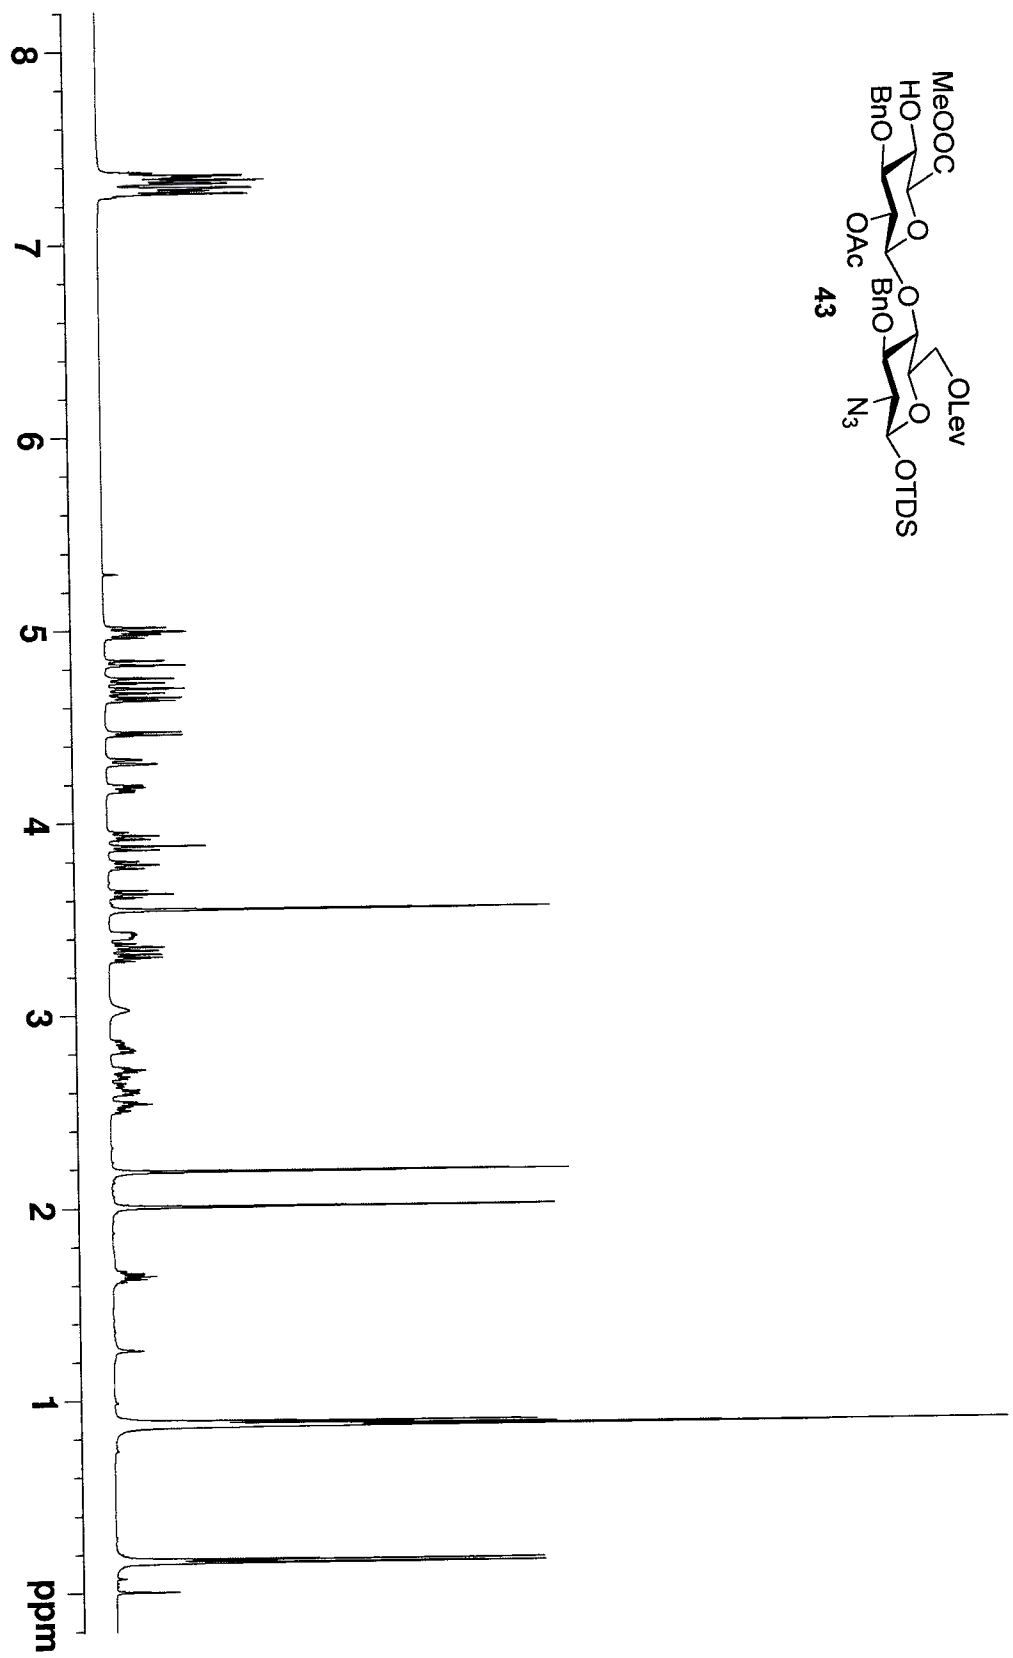

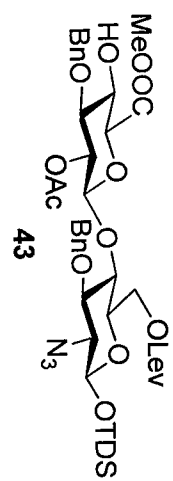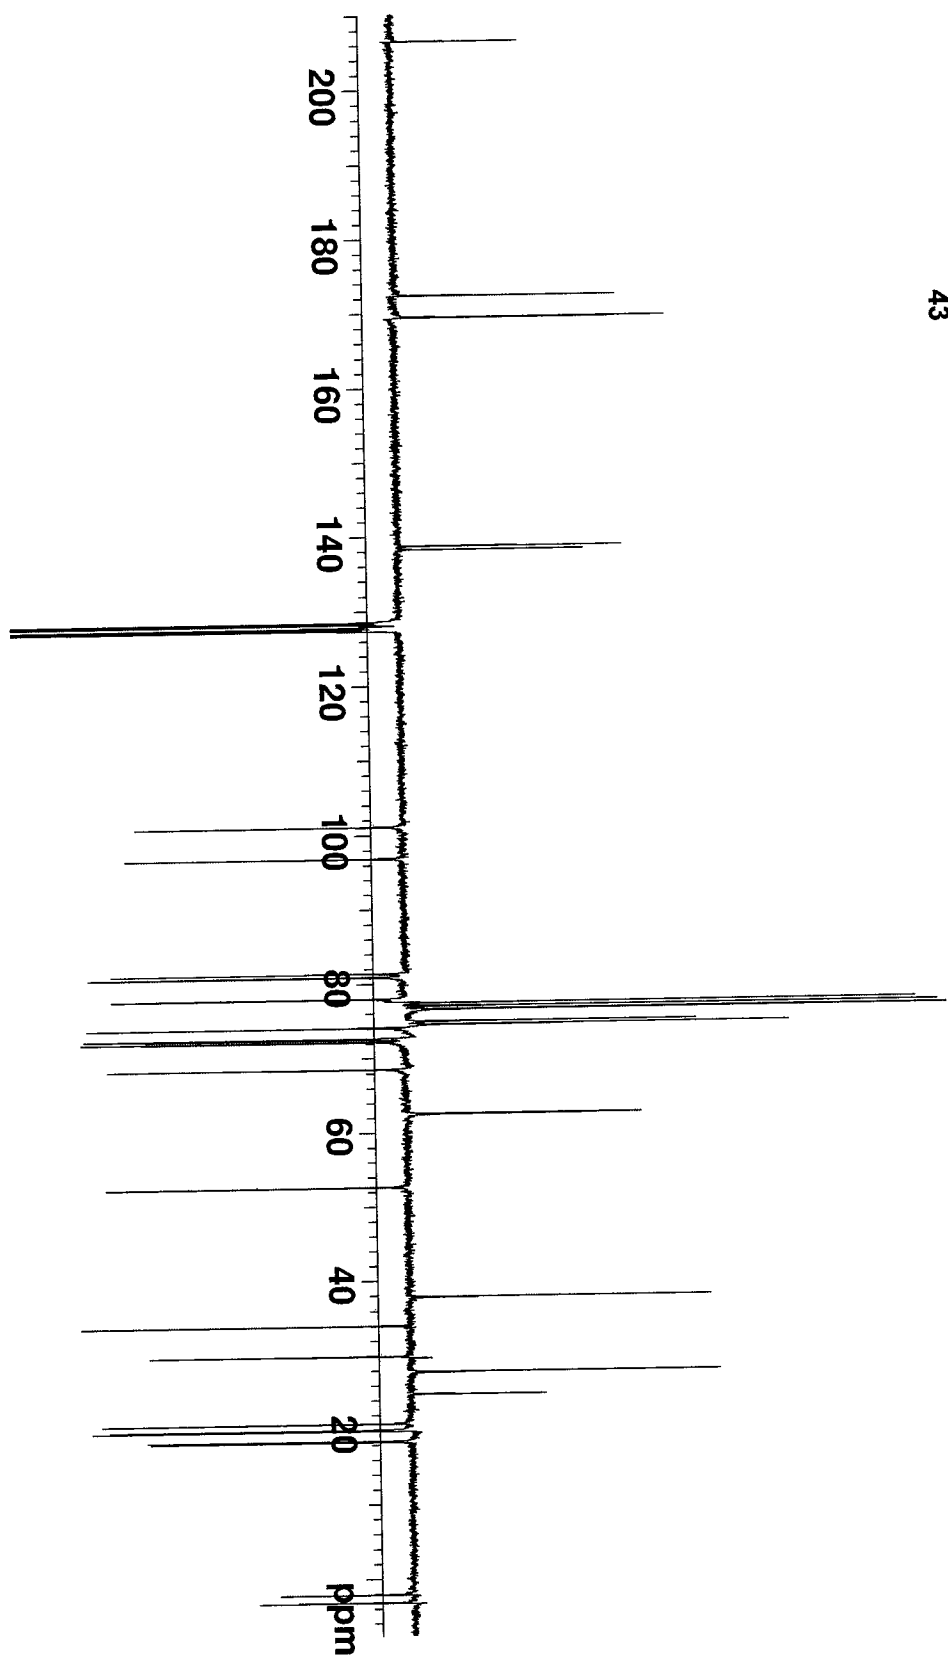

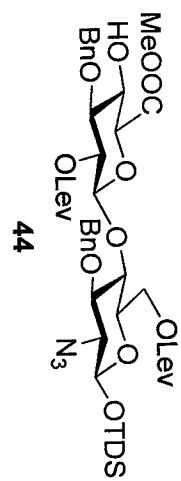

44

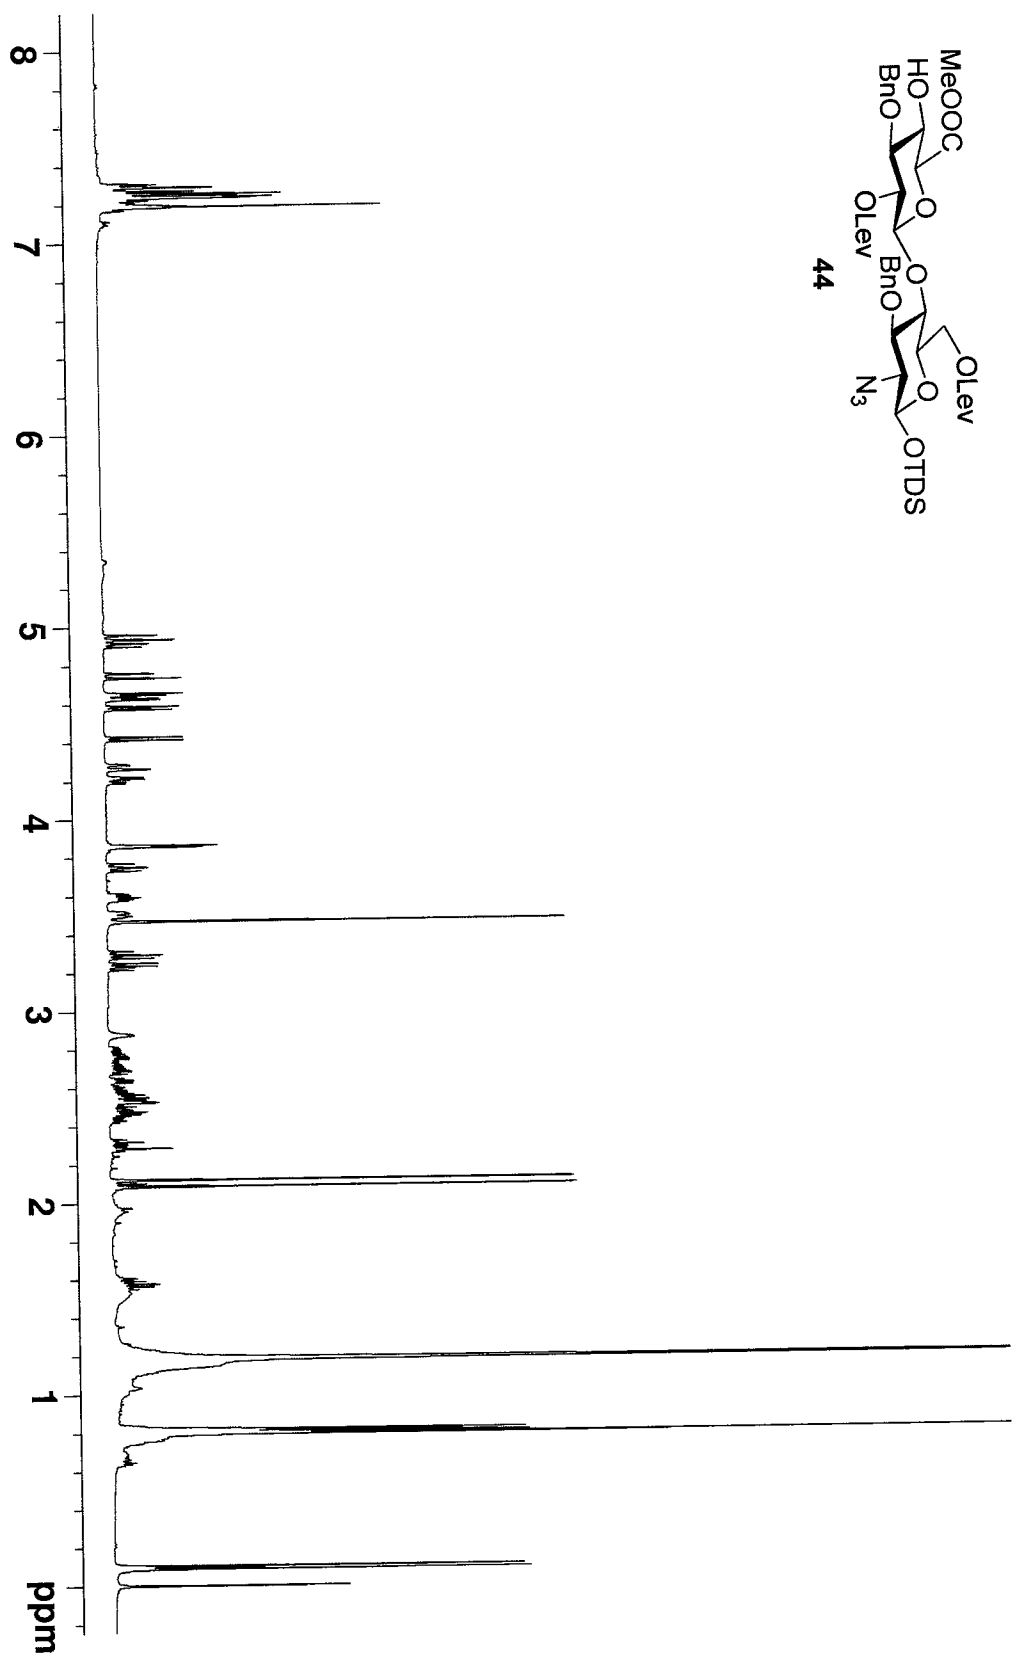

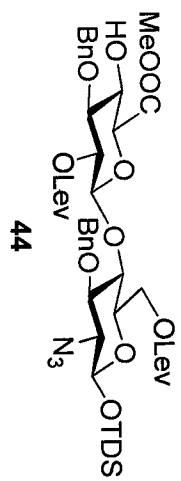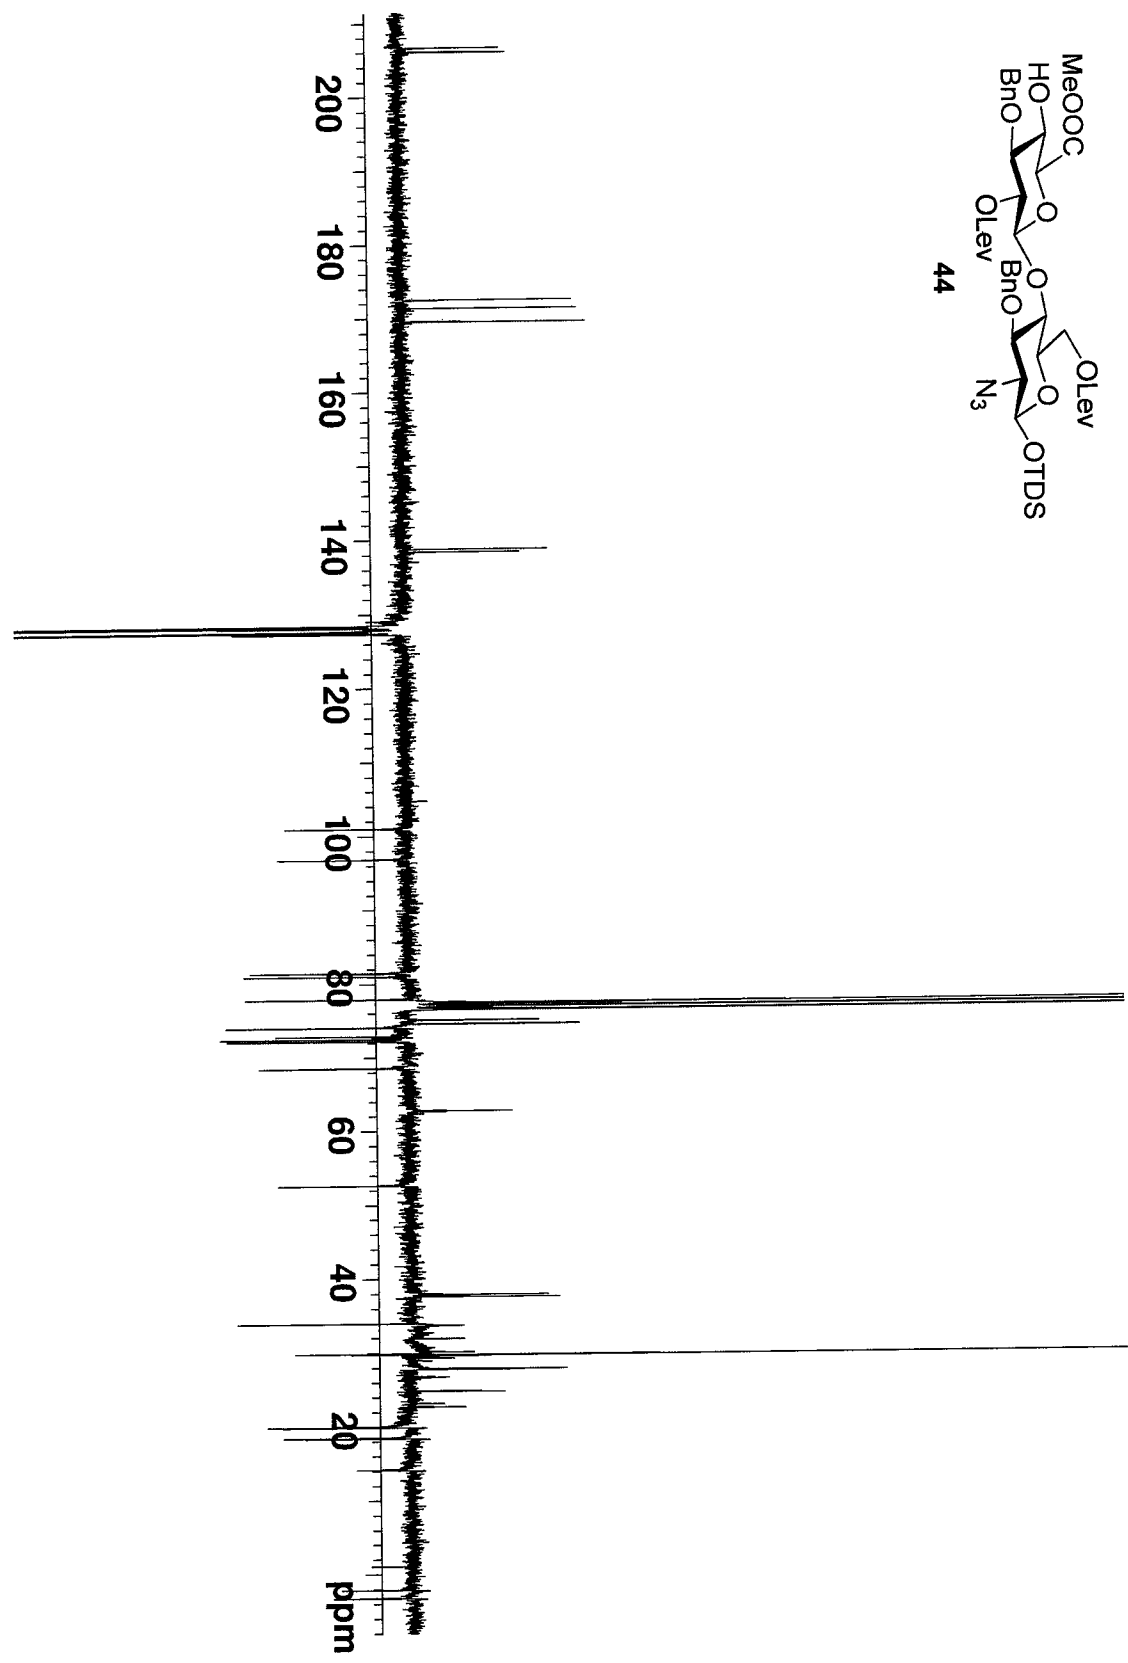

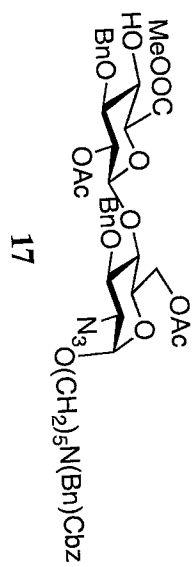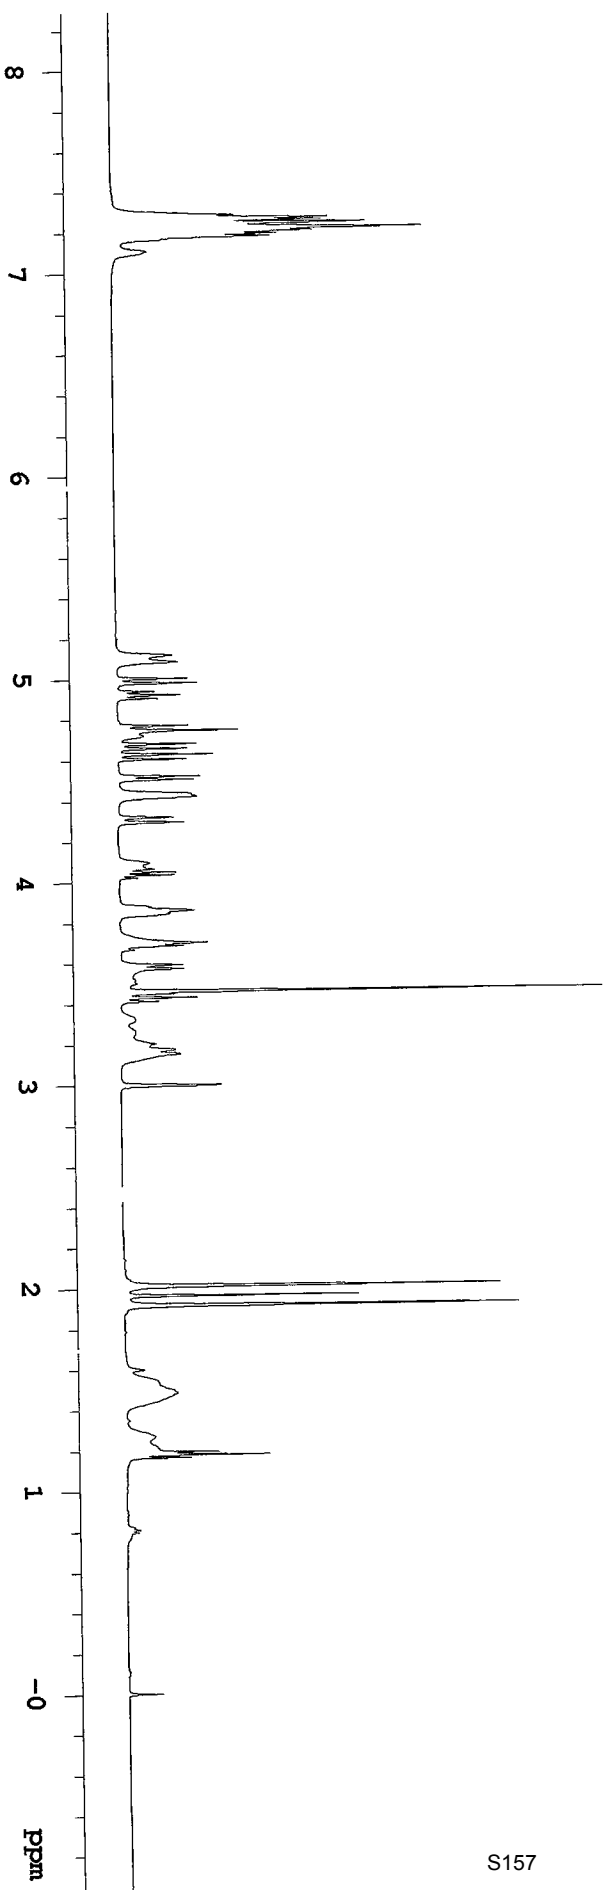



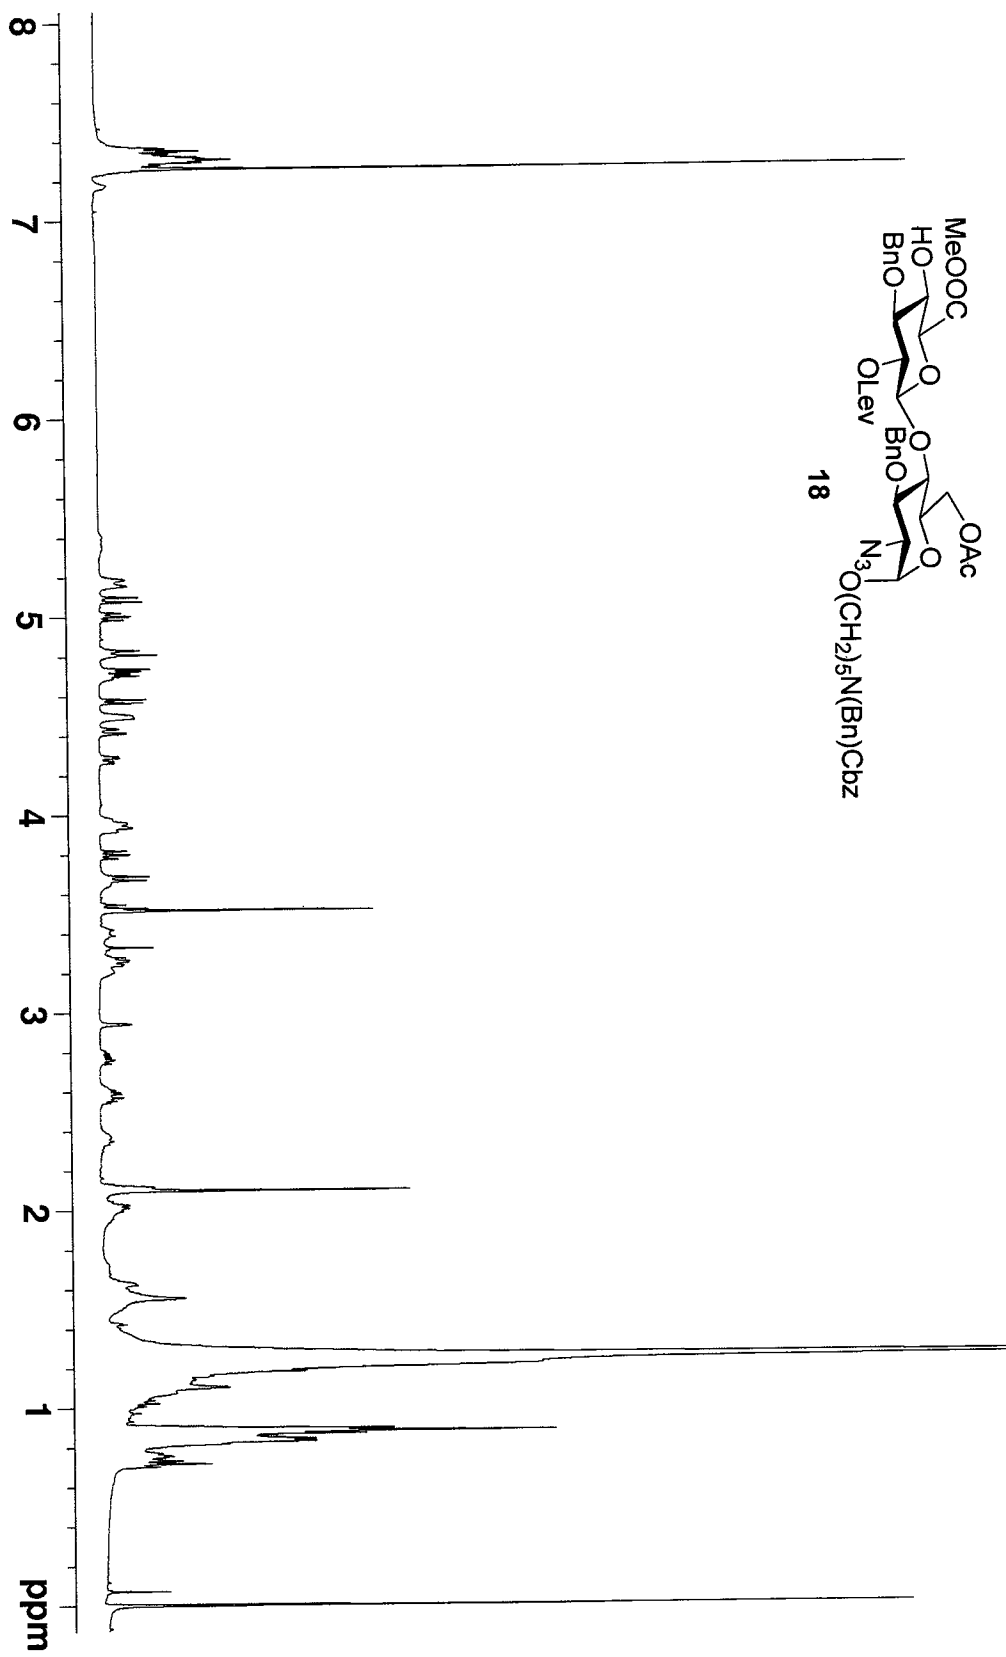

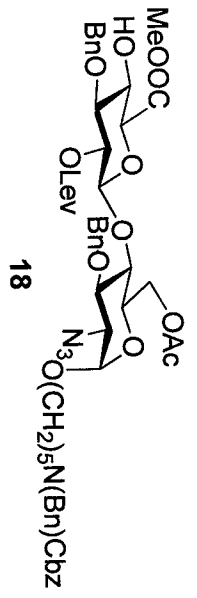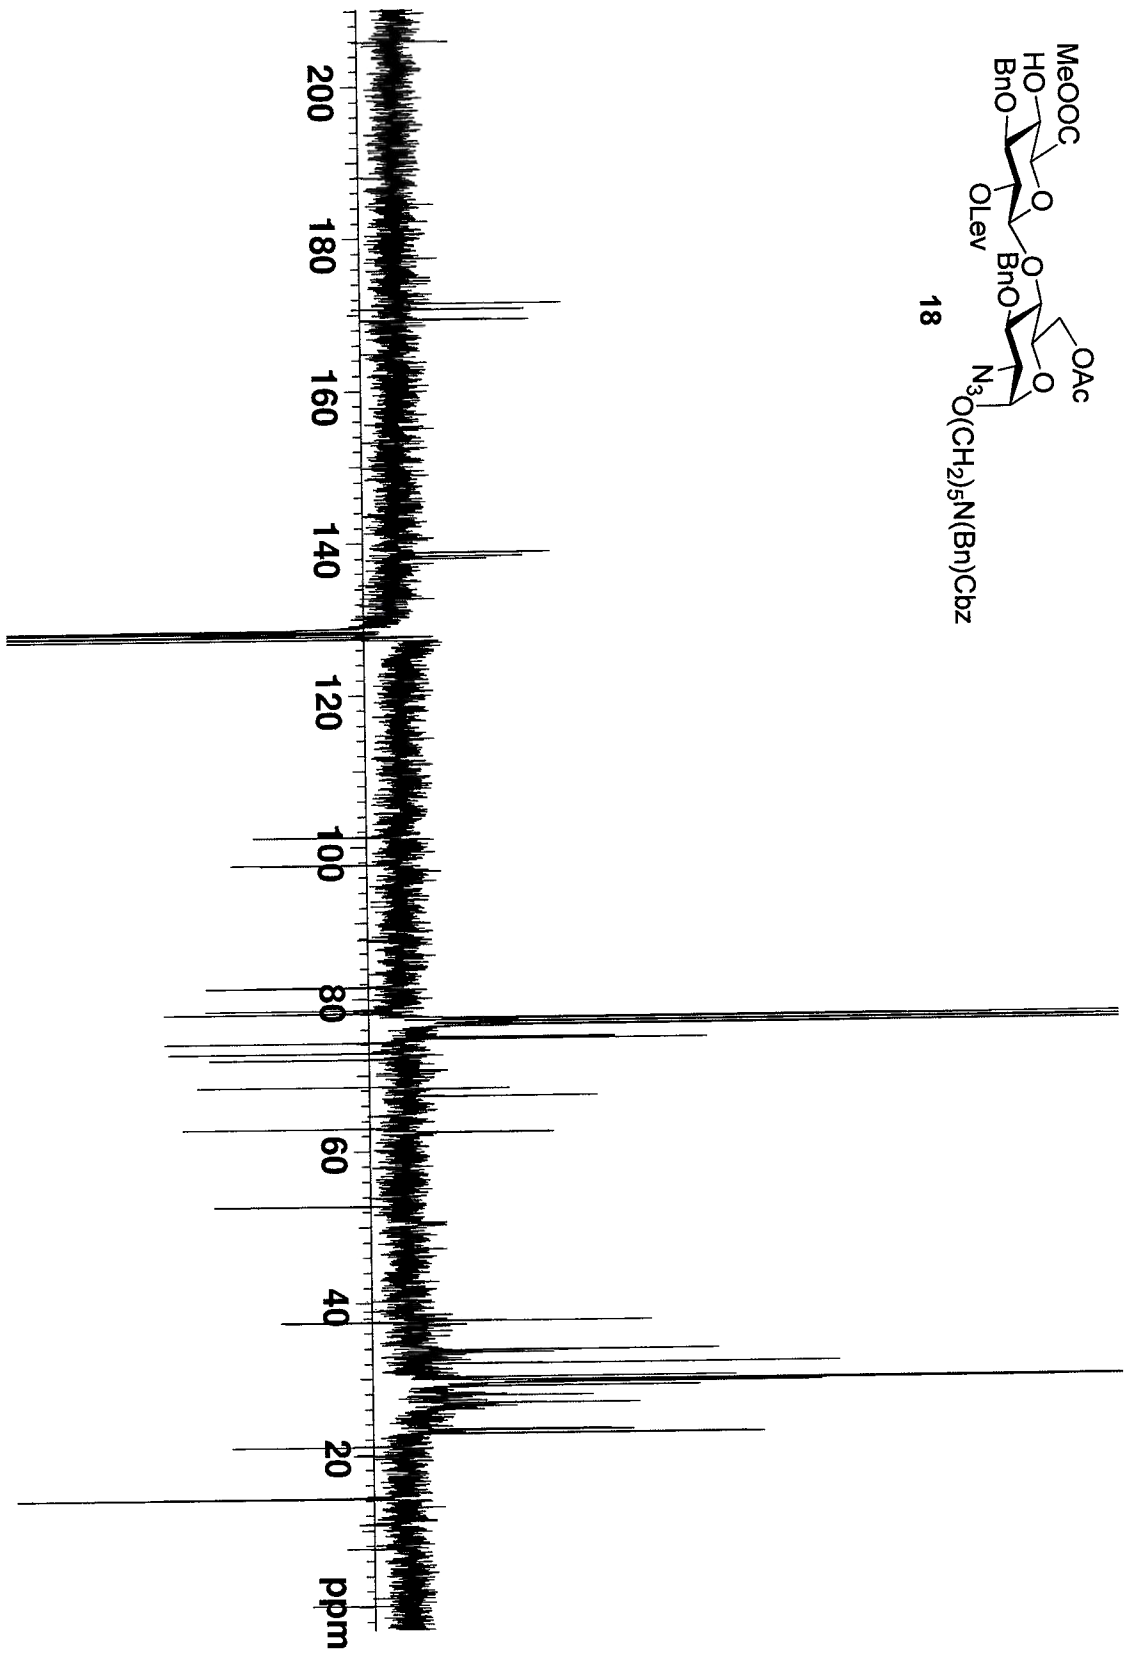



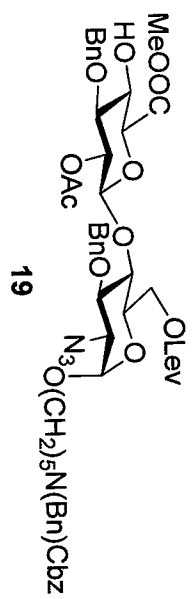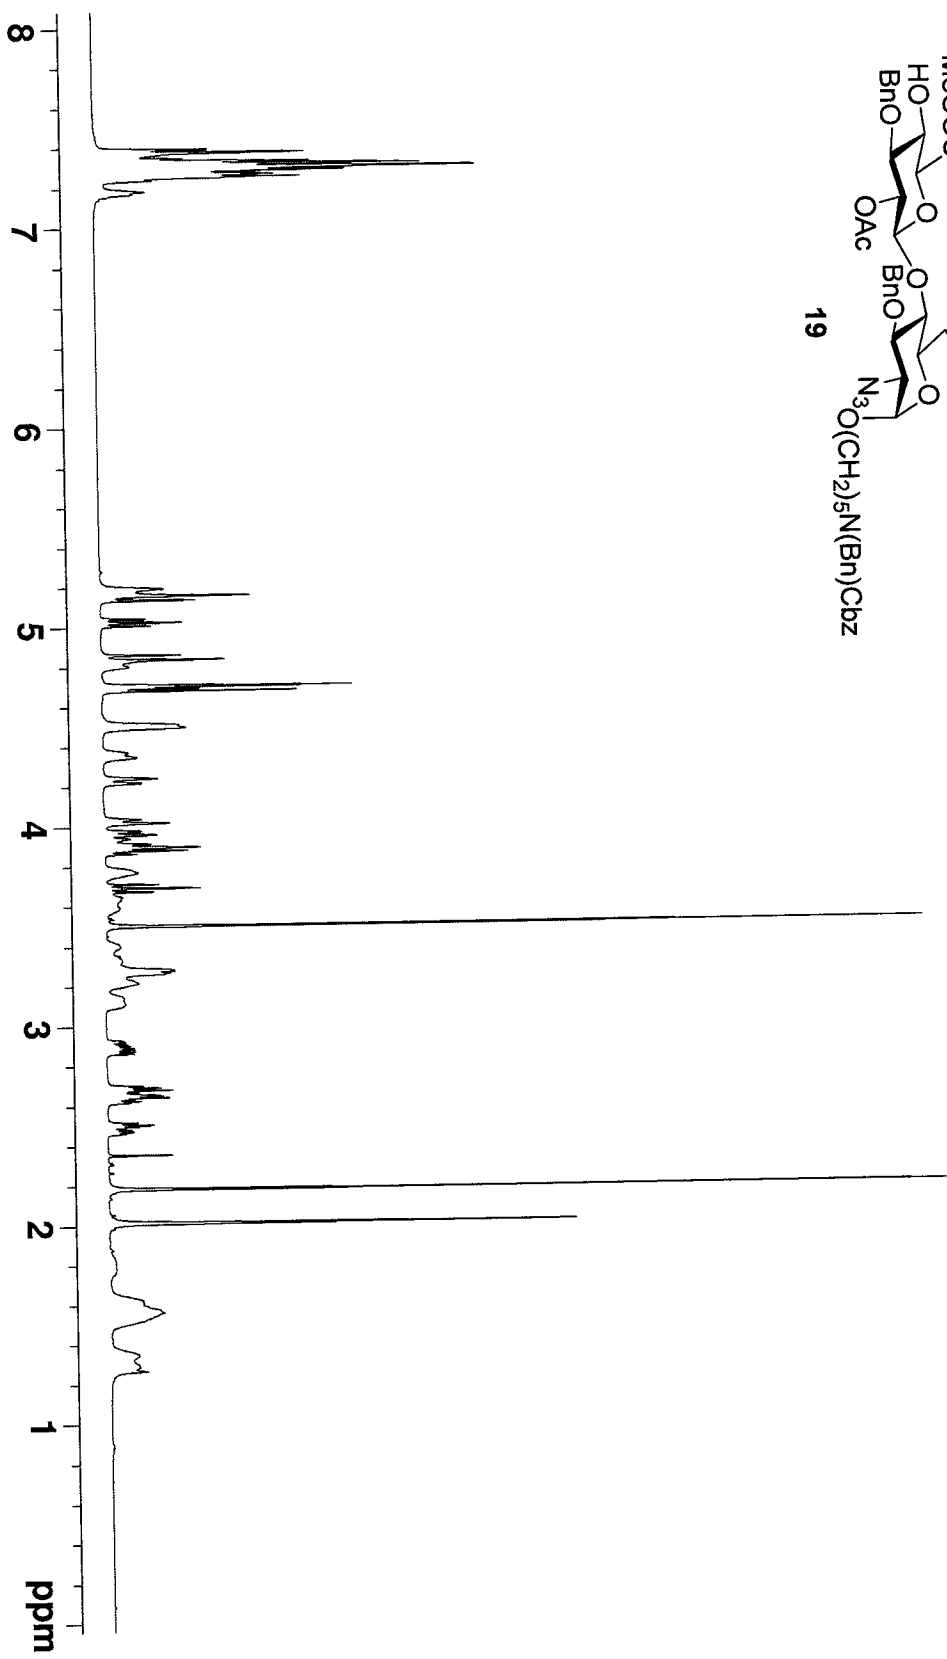

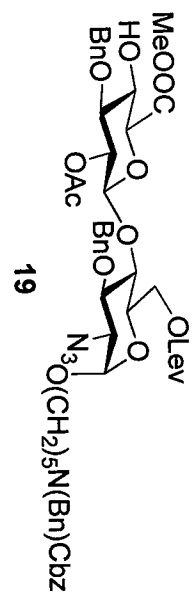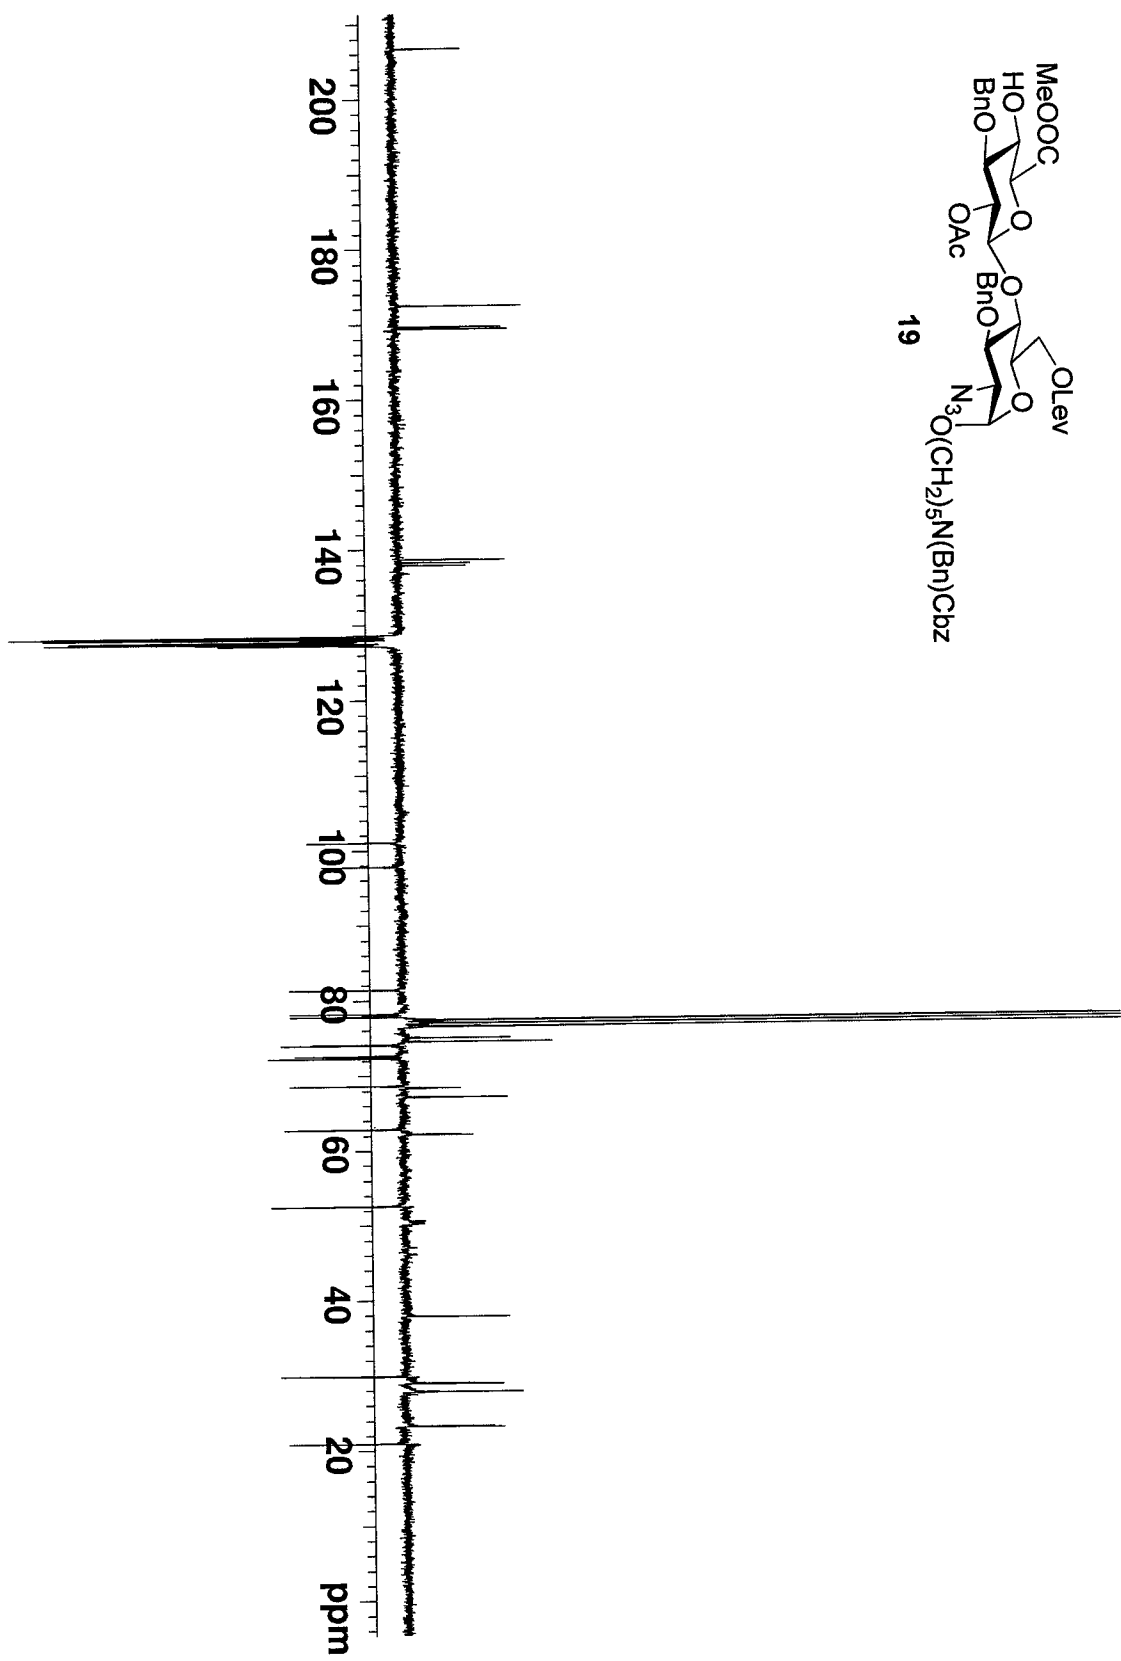

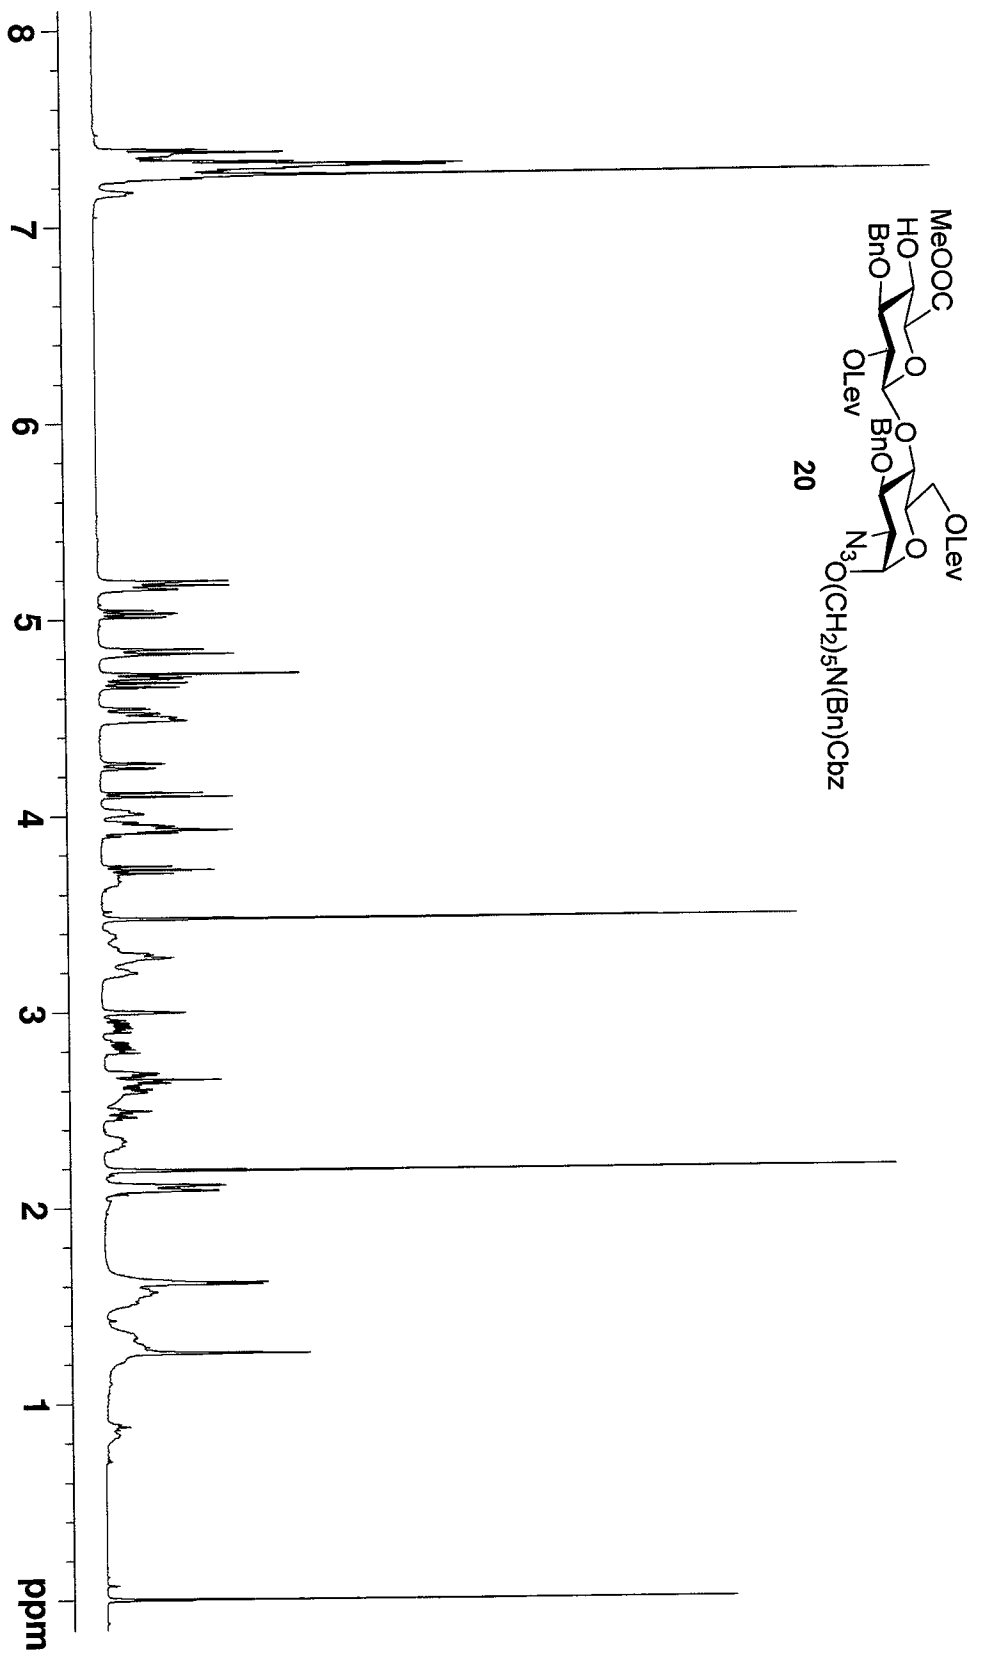

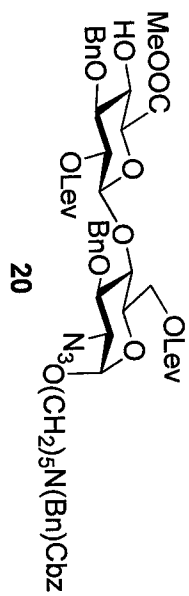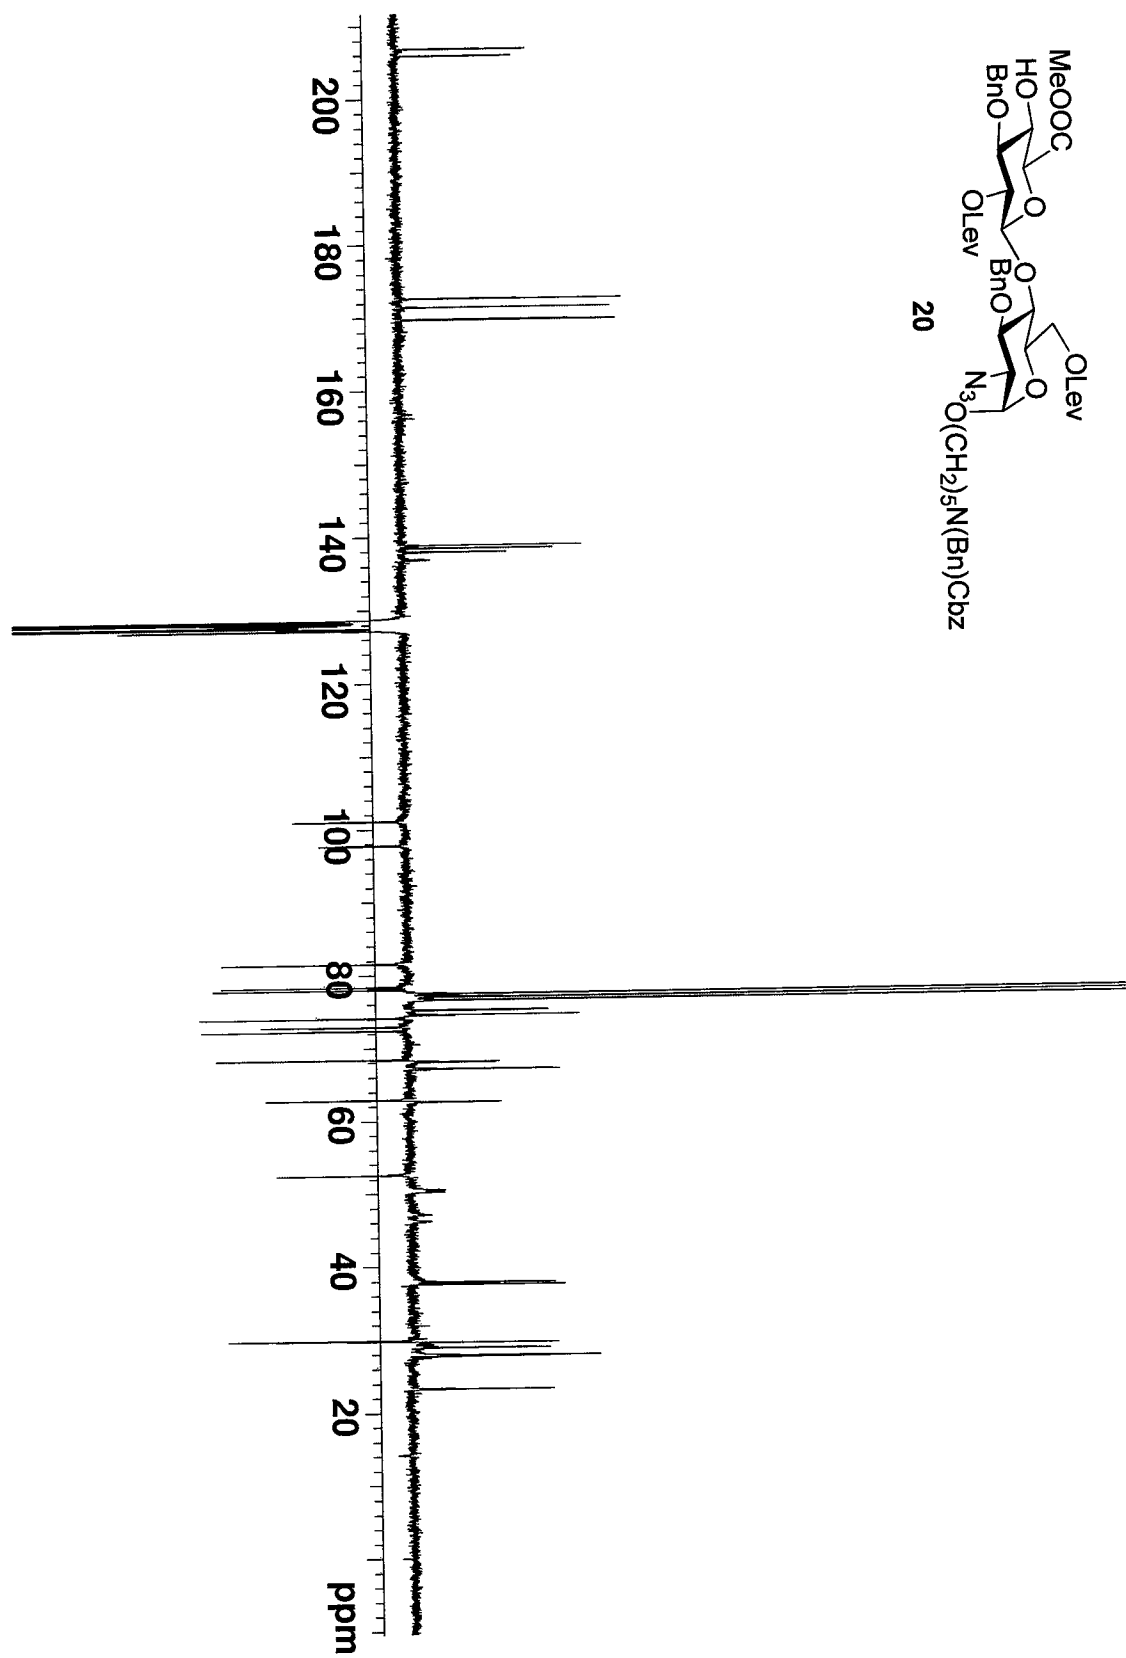

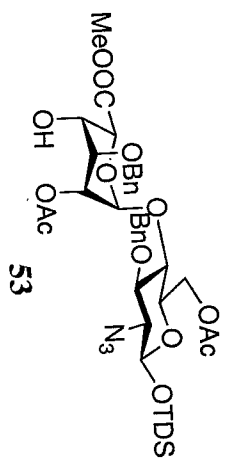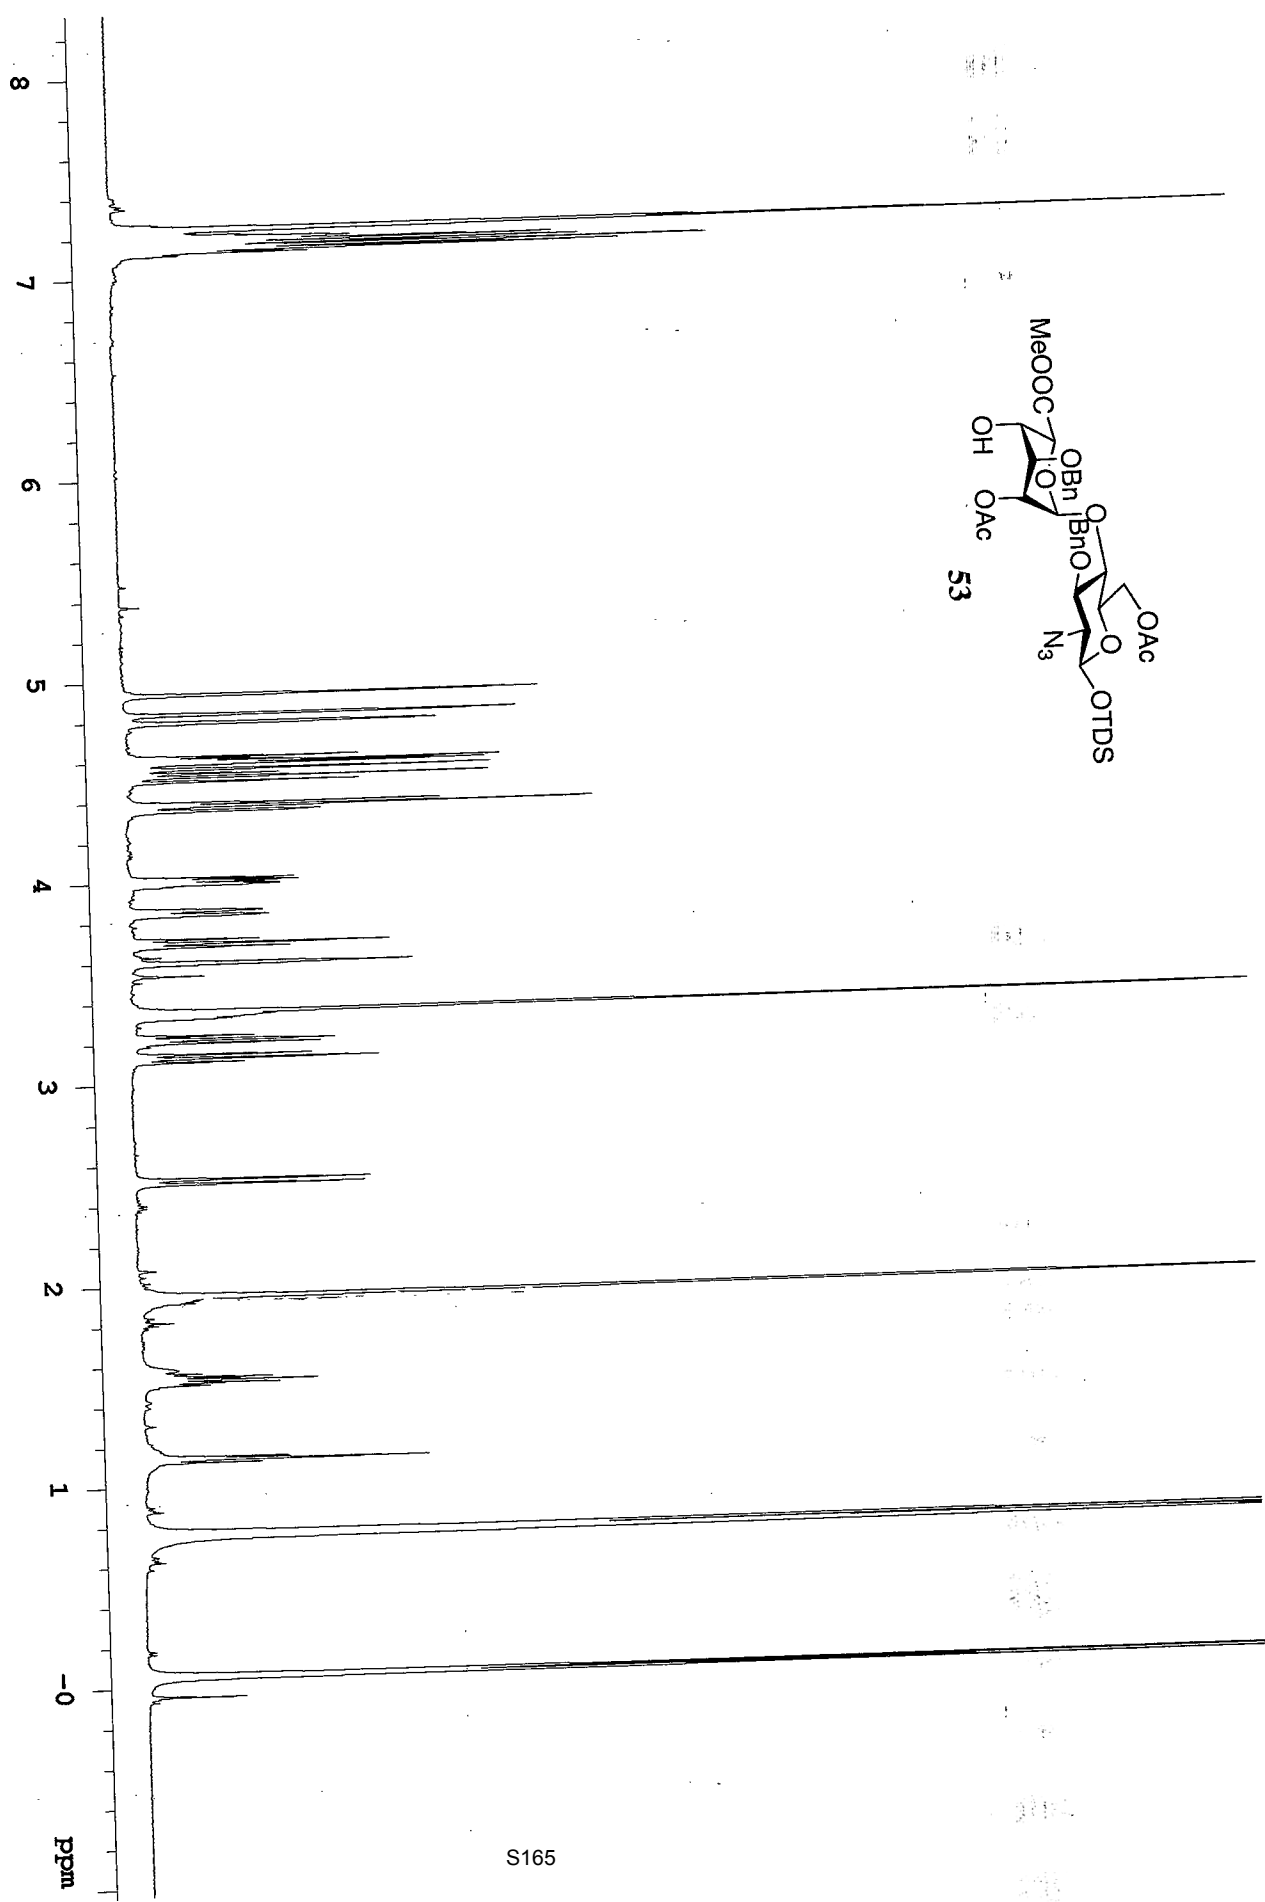

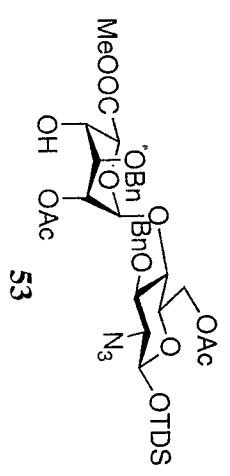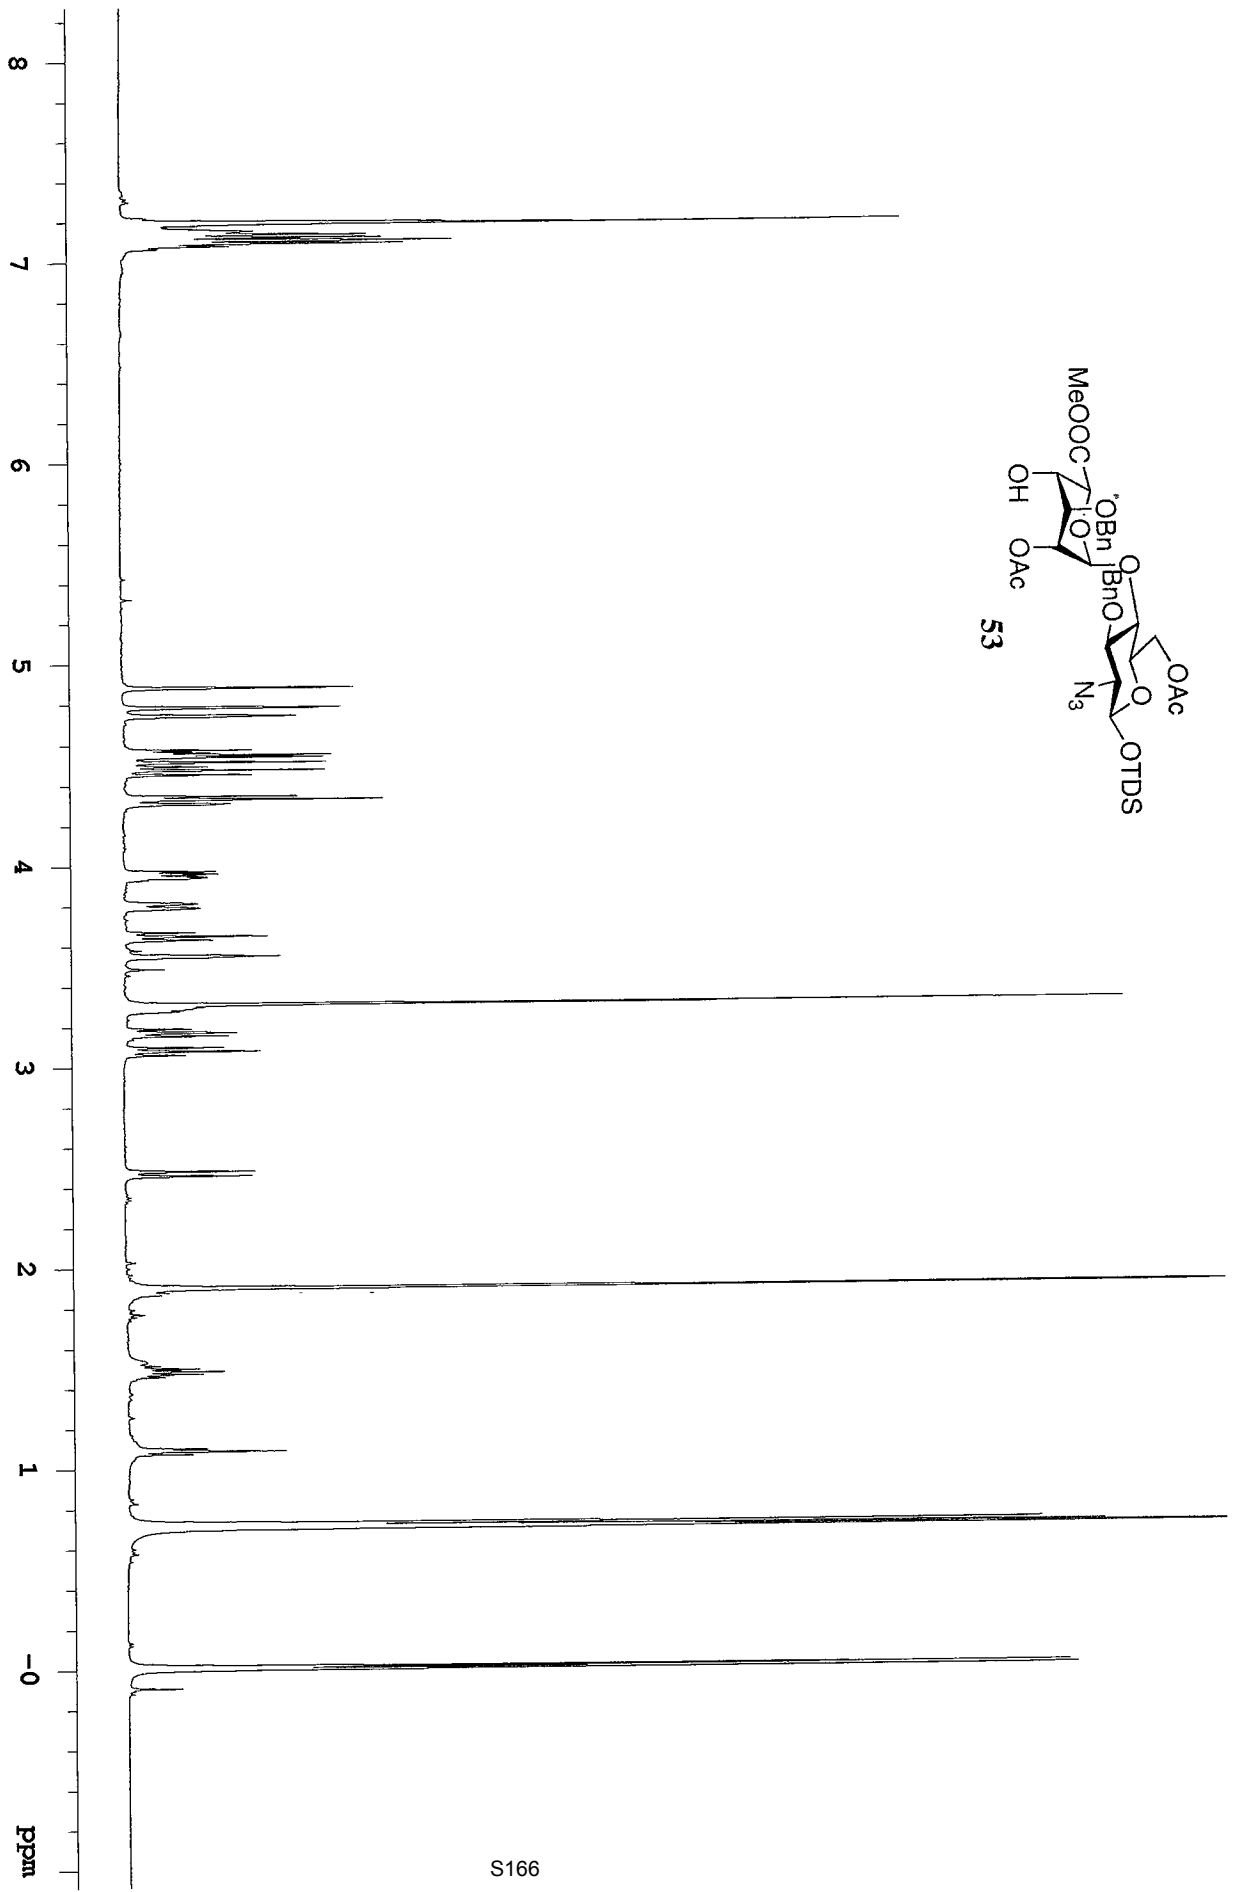

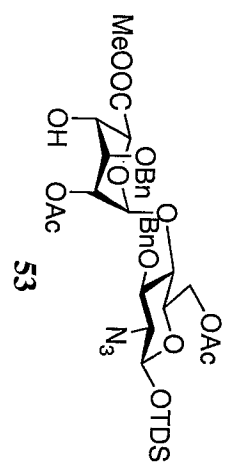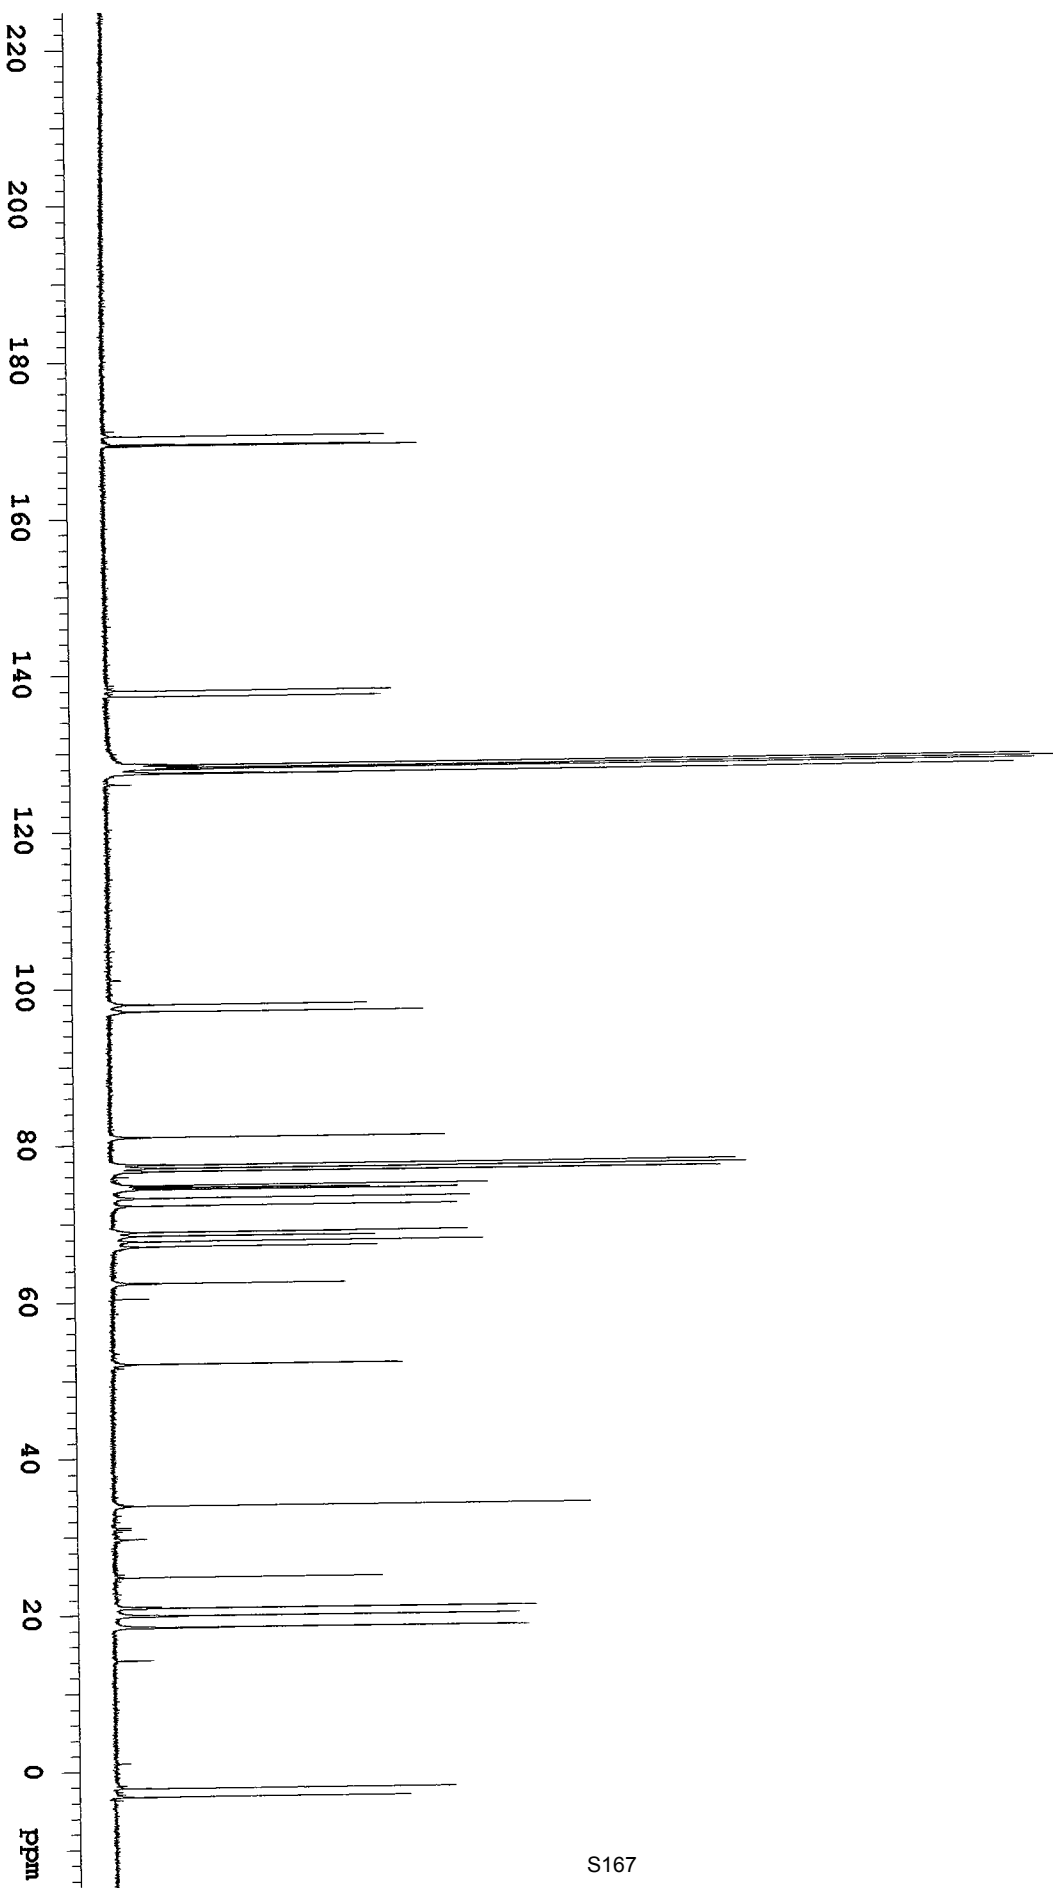

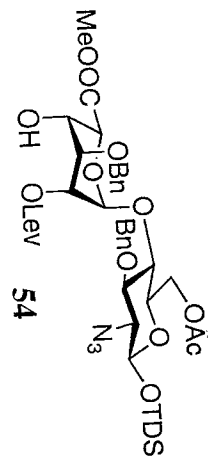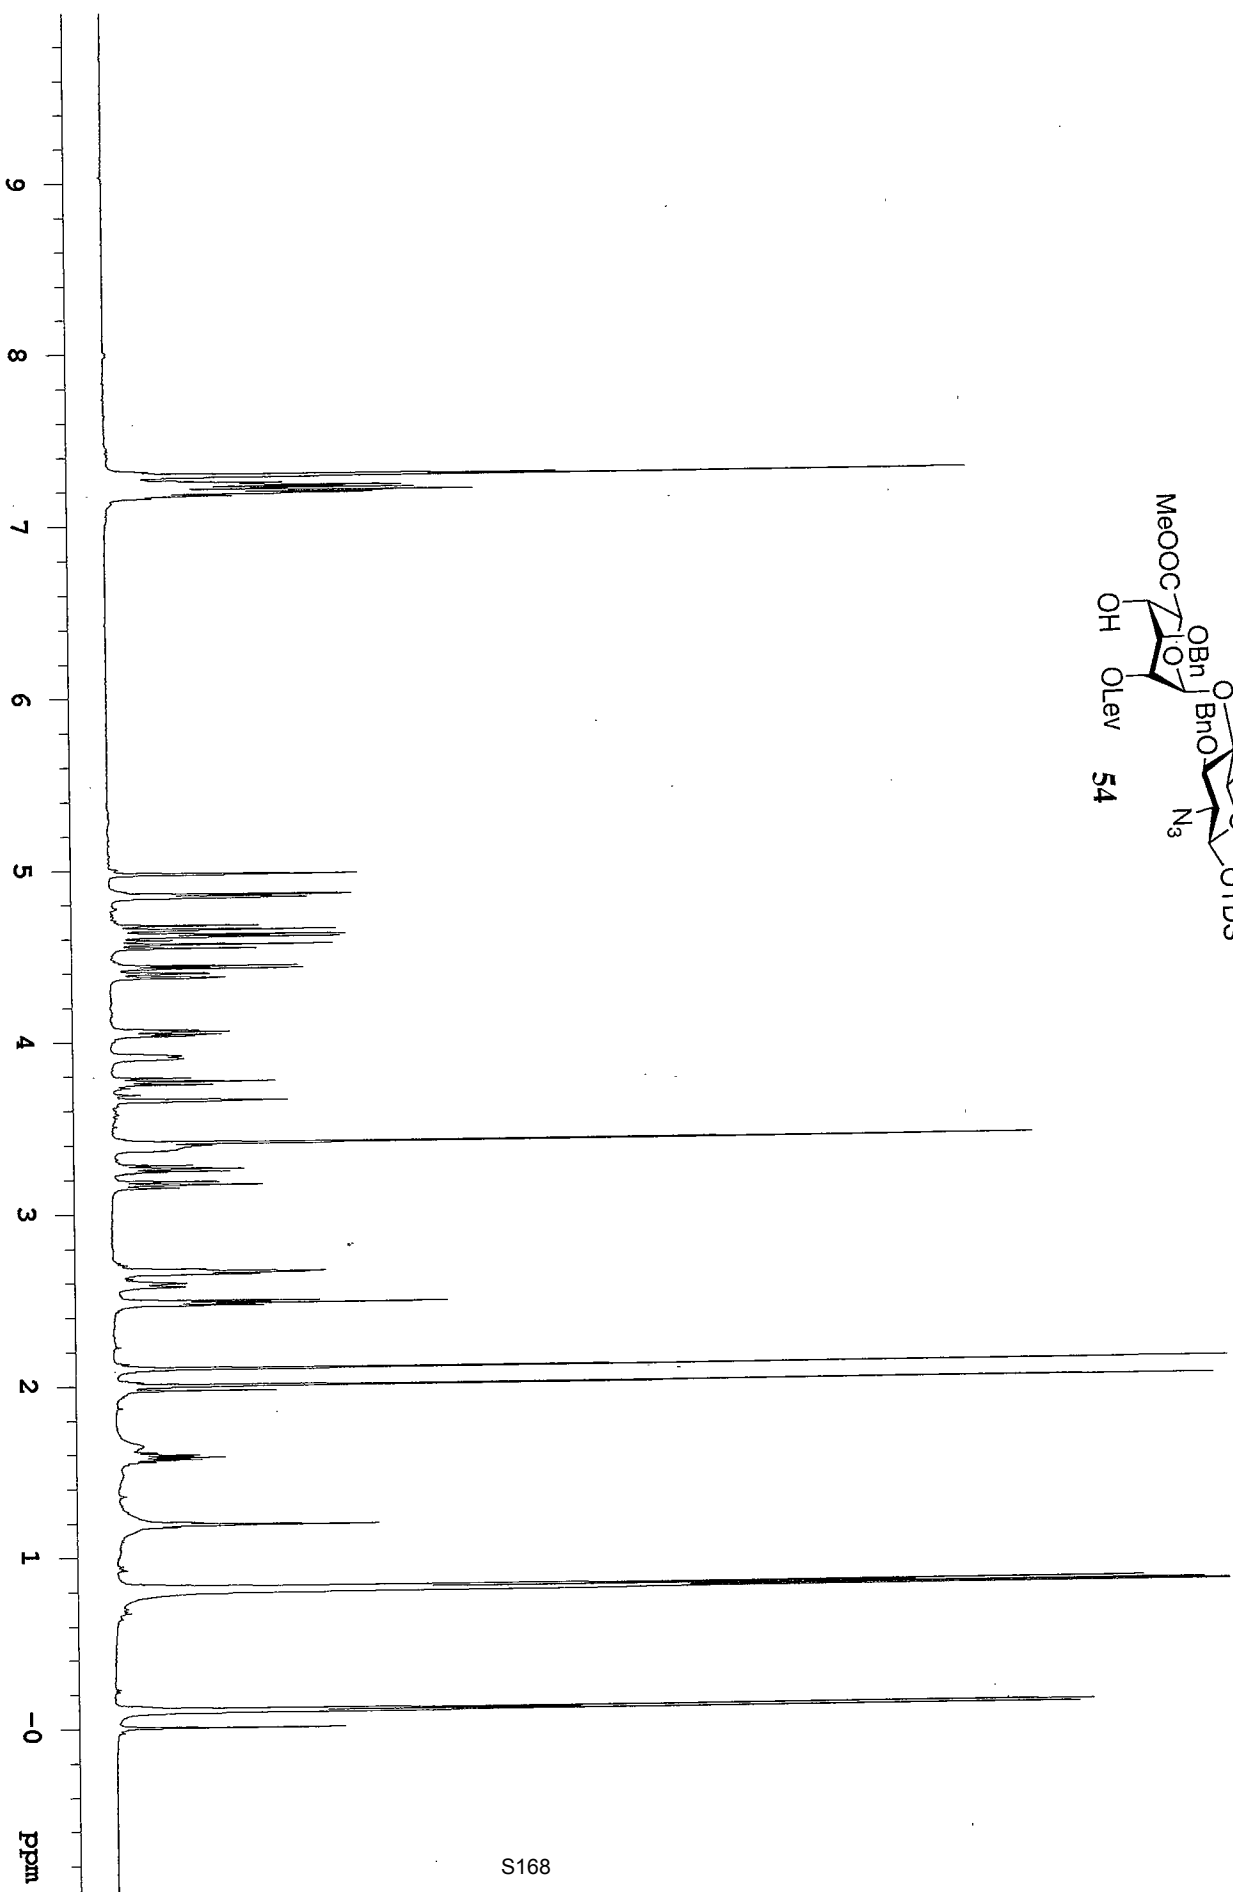



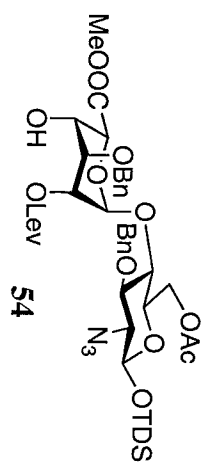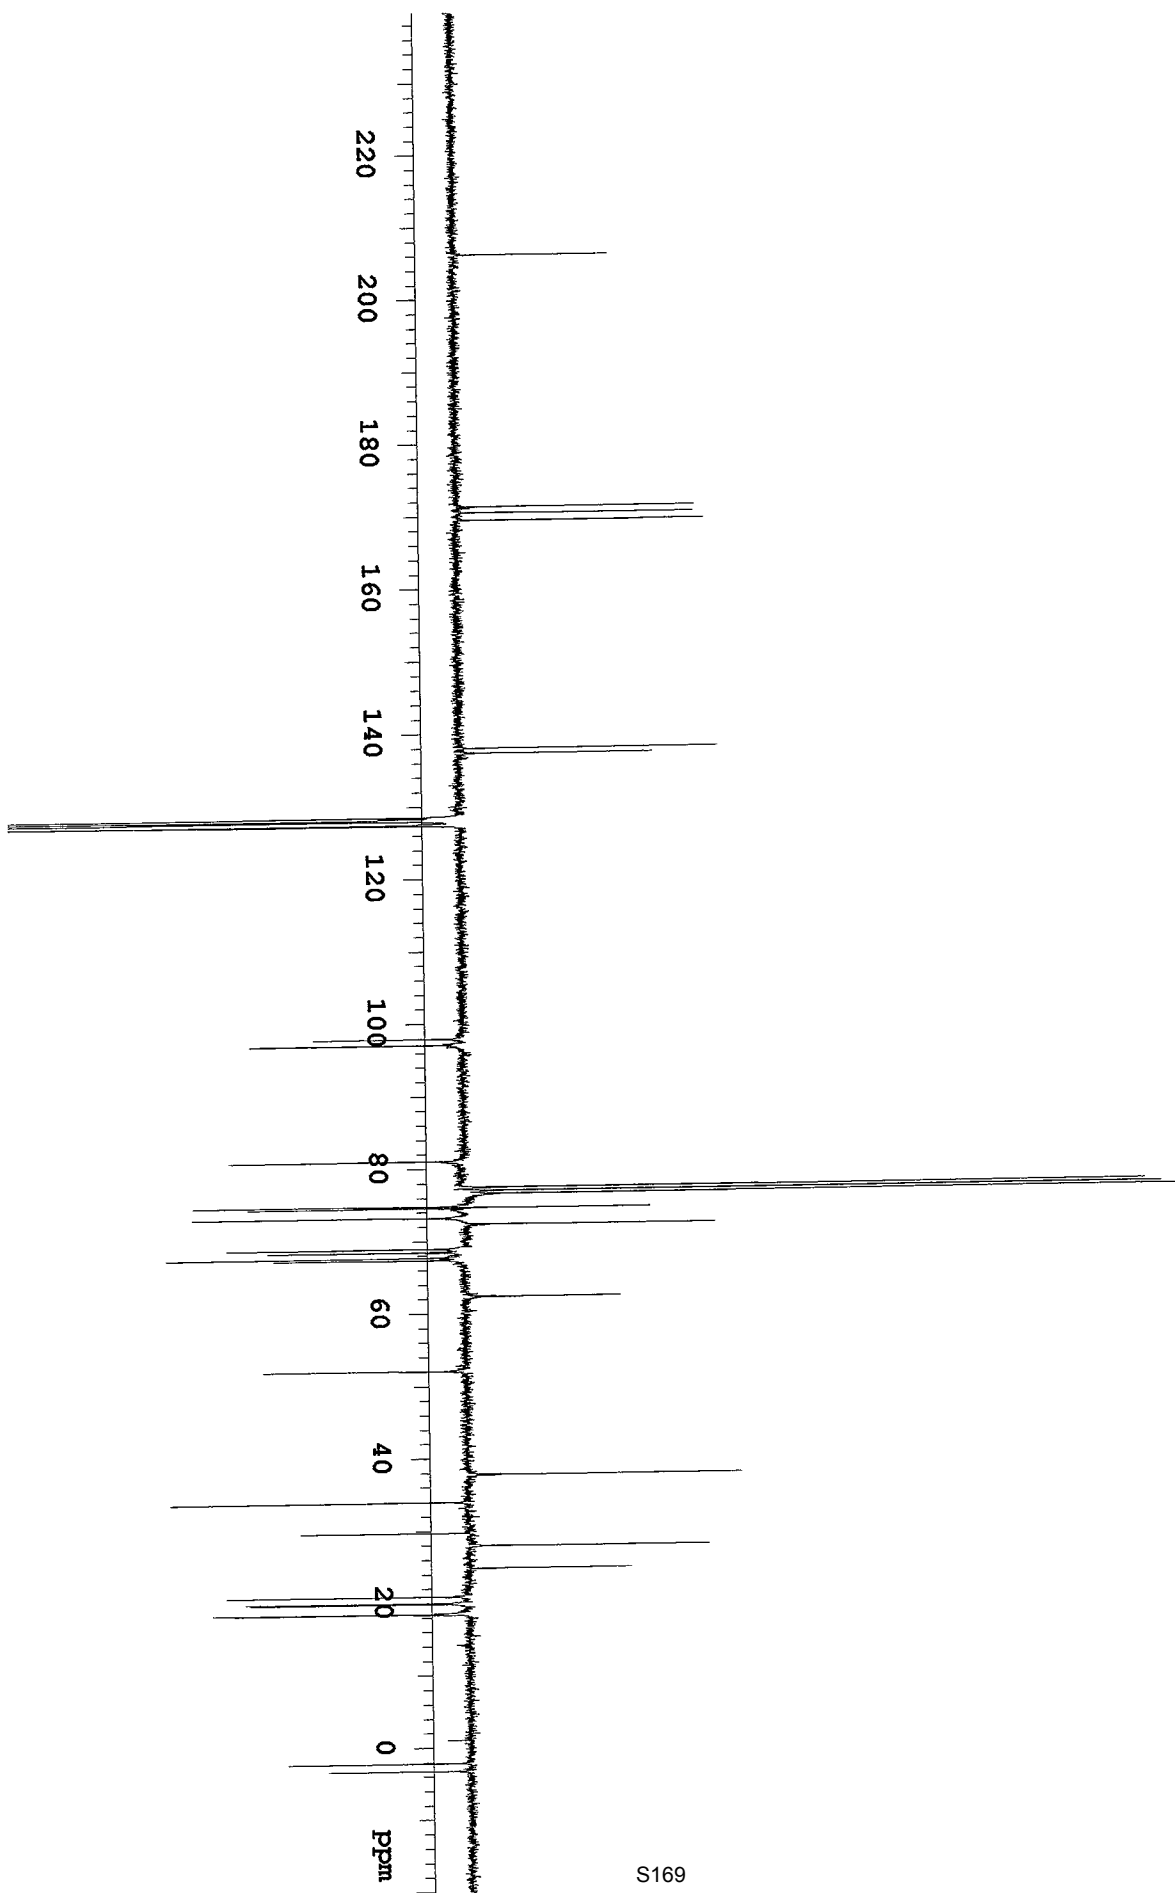

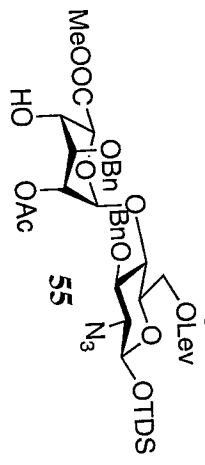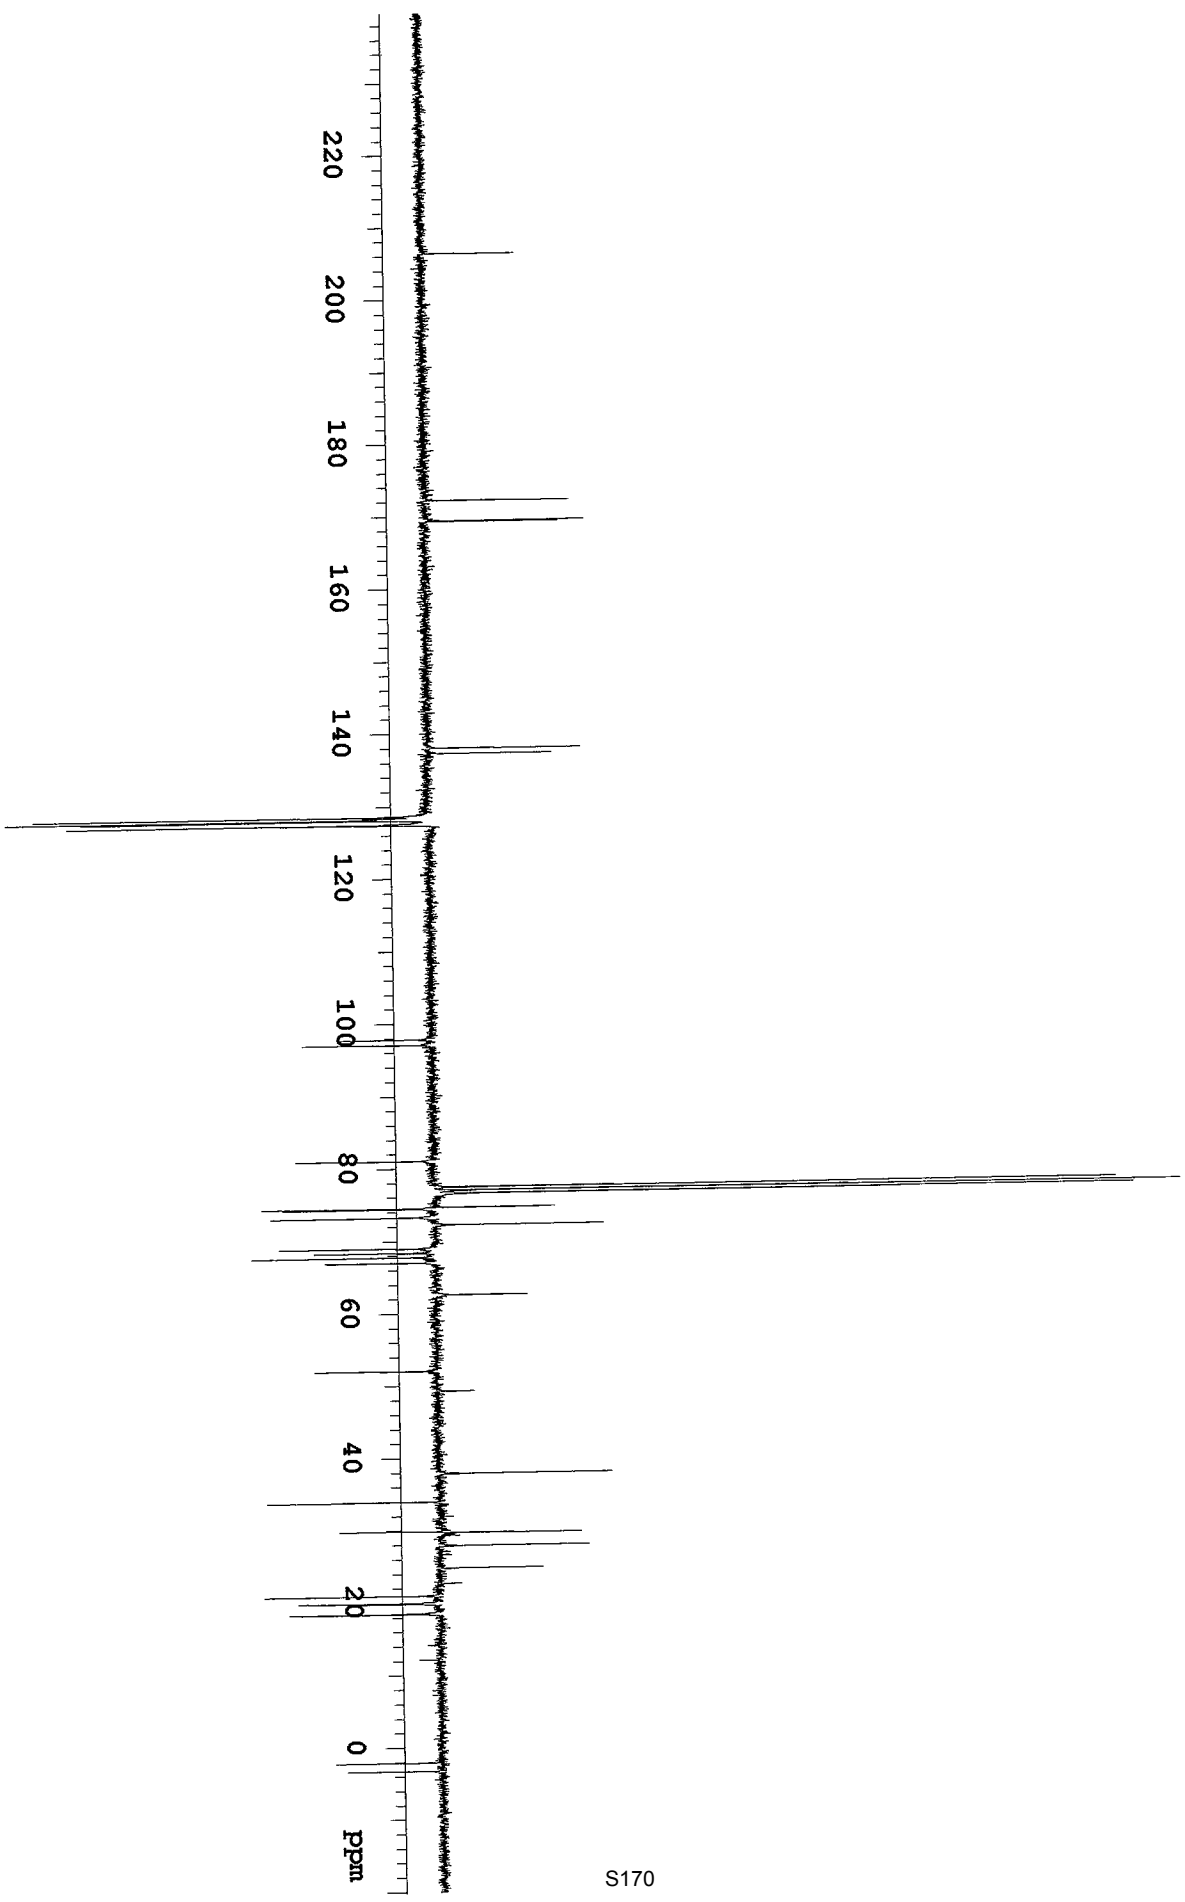

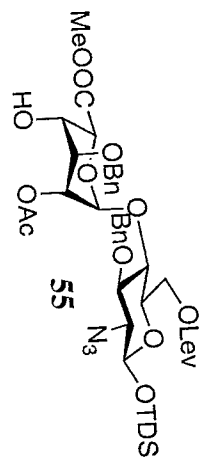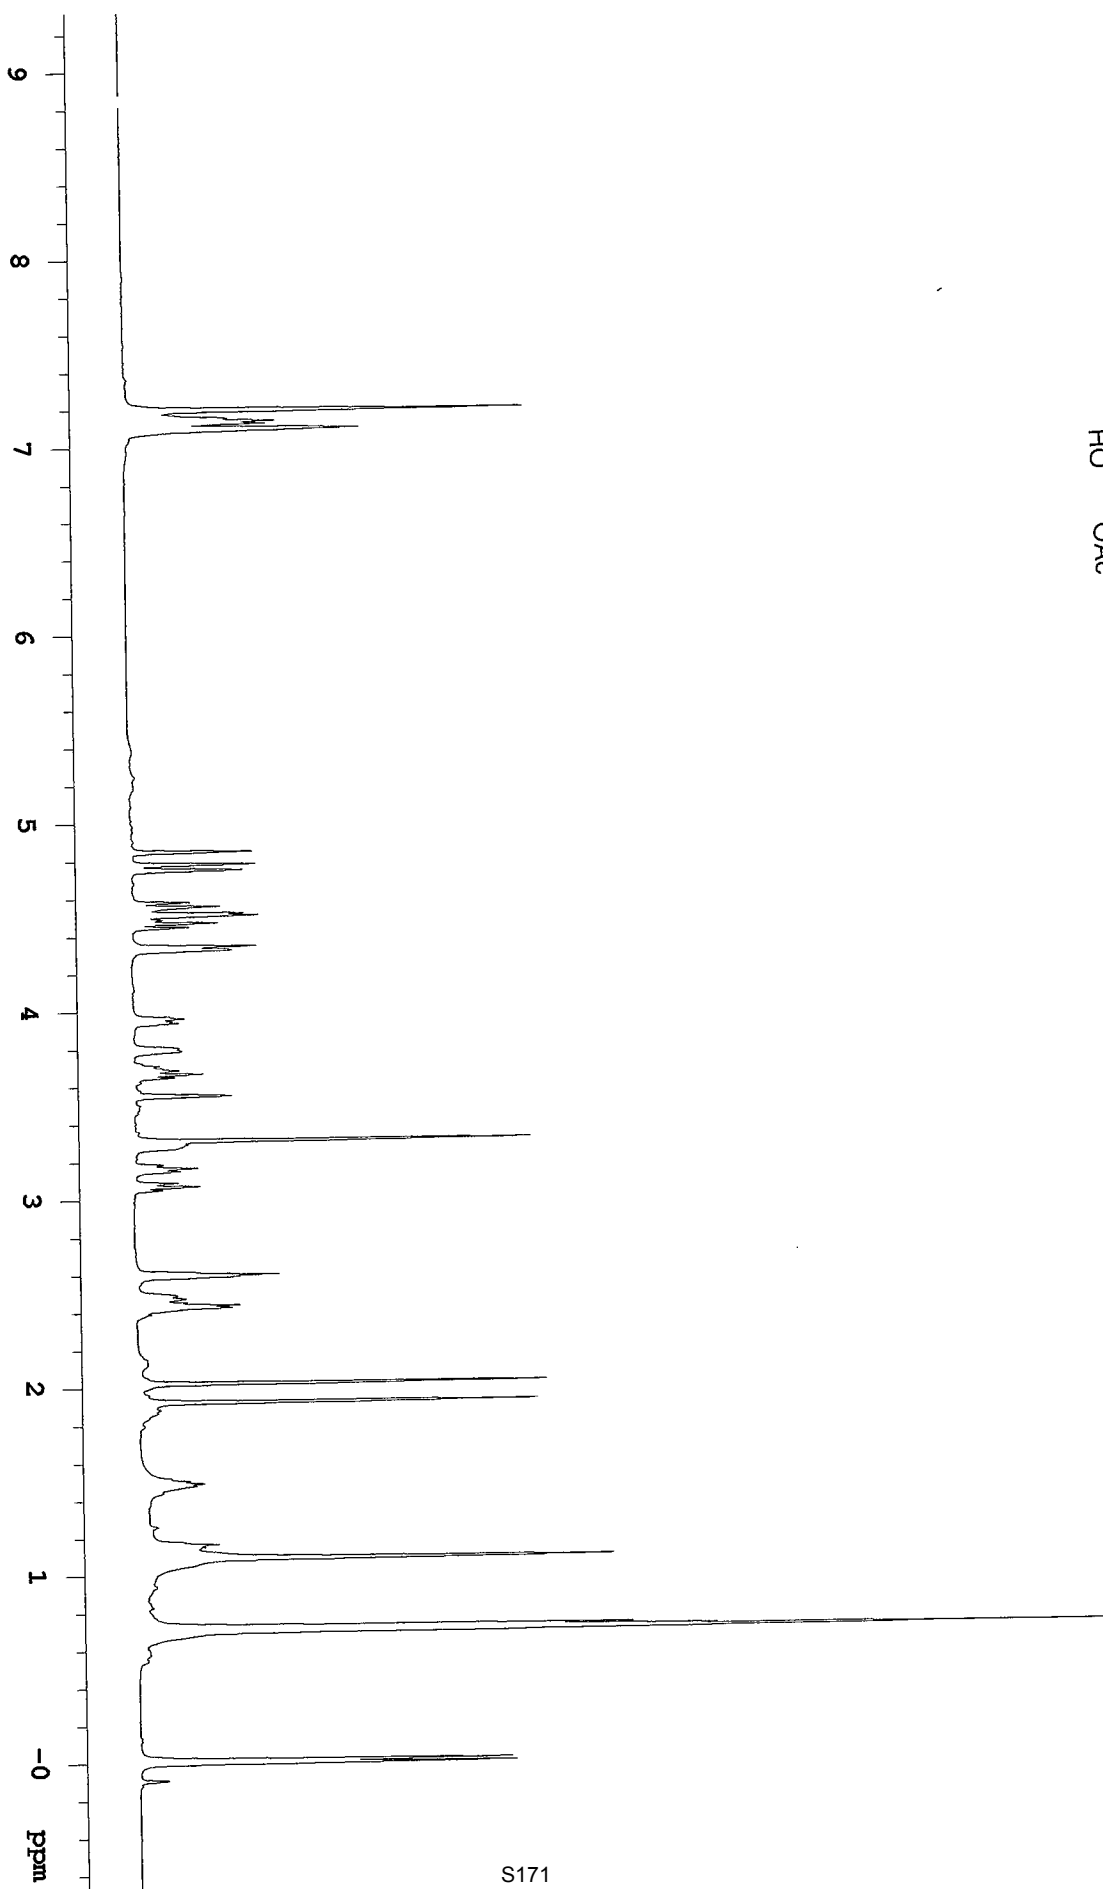

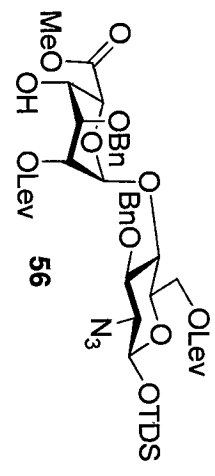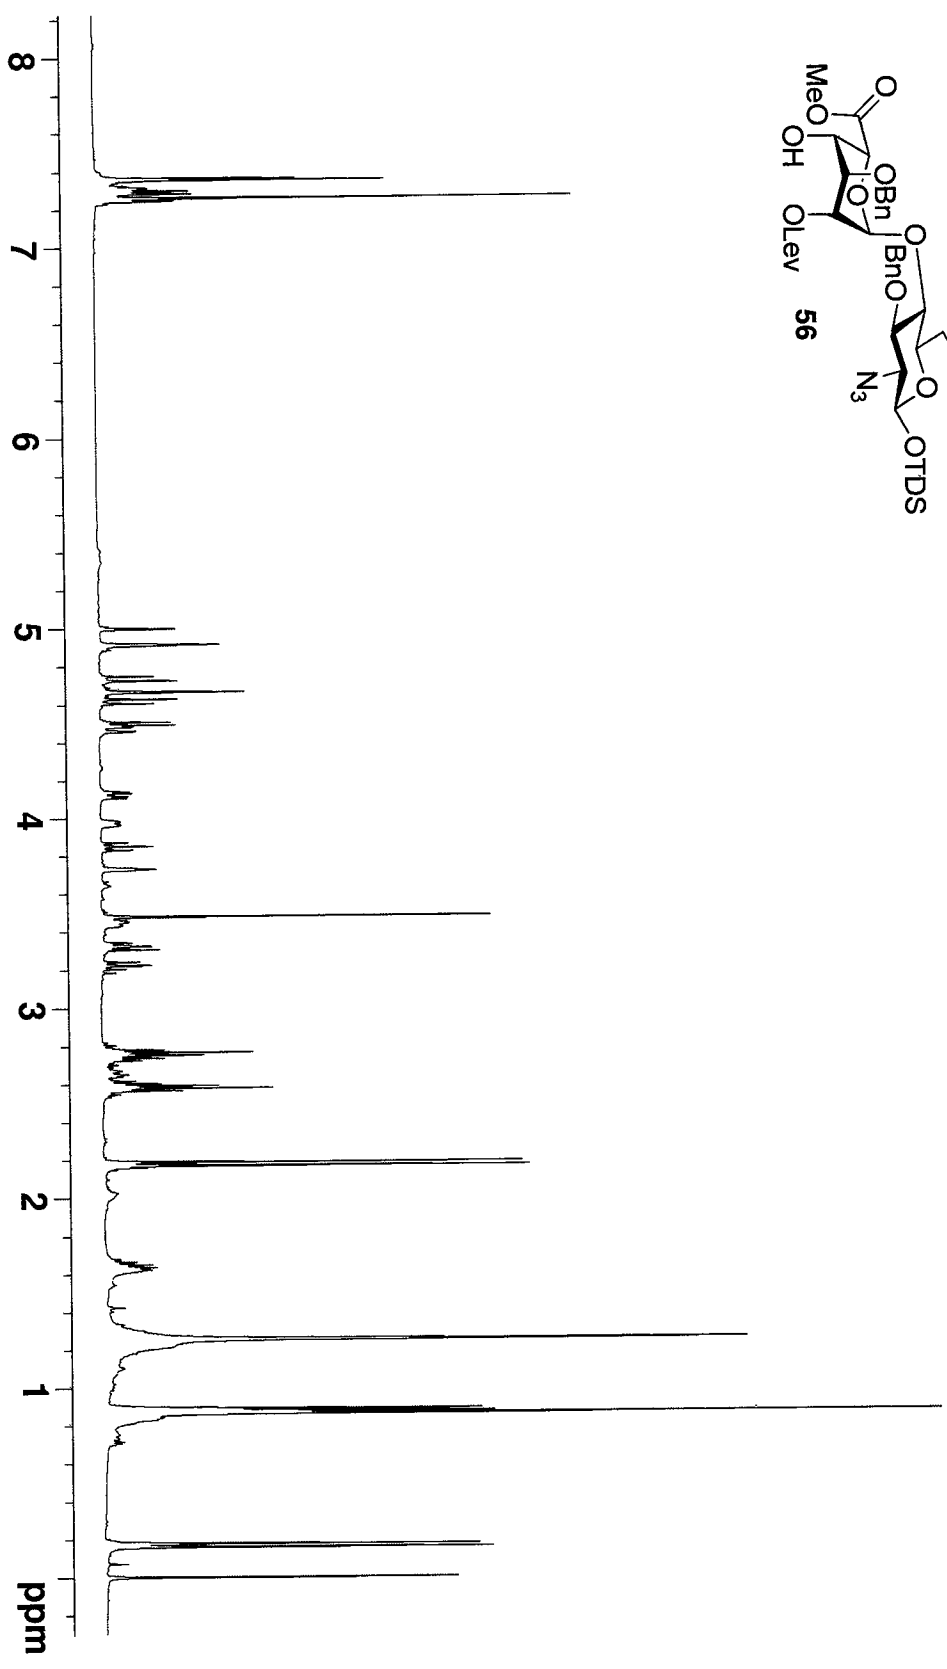

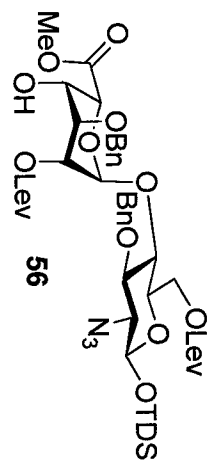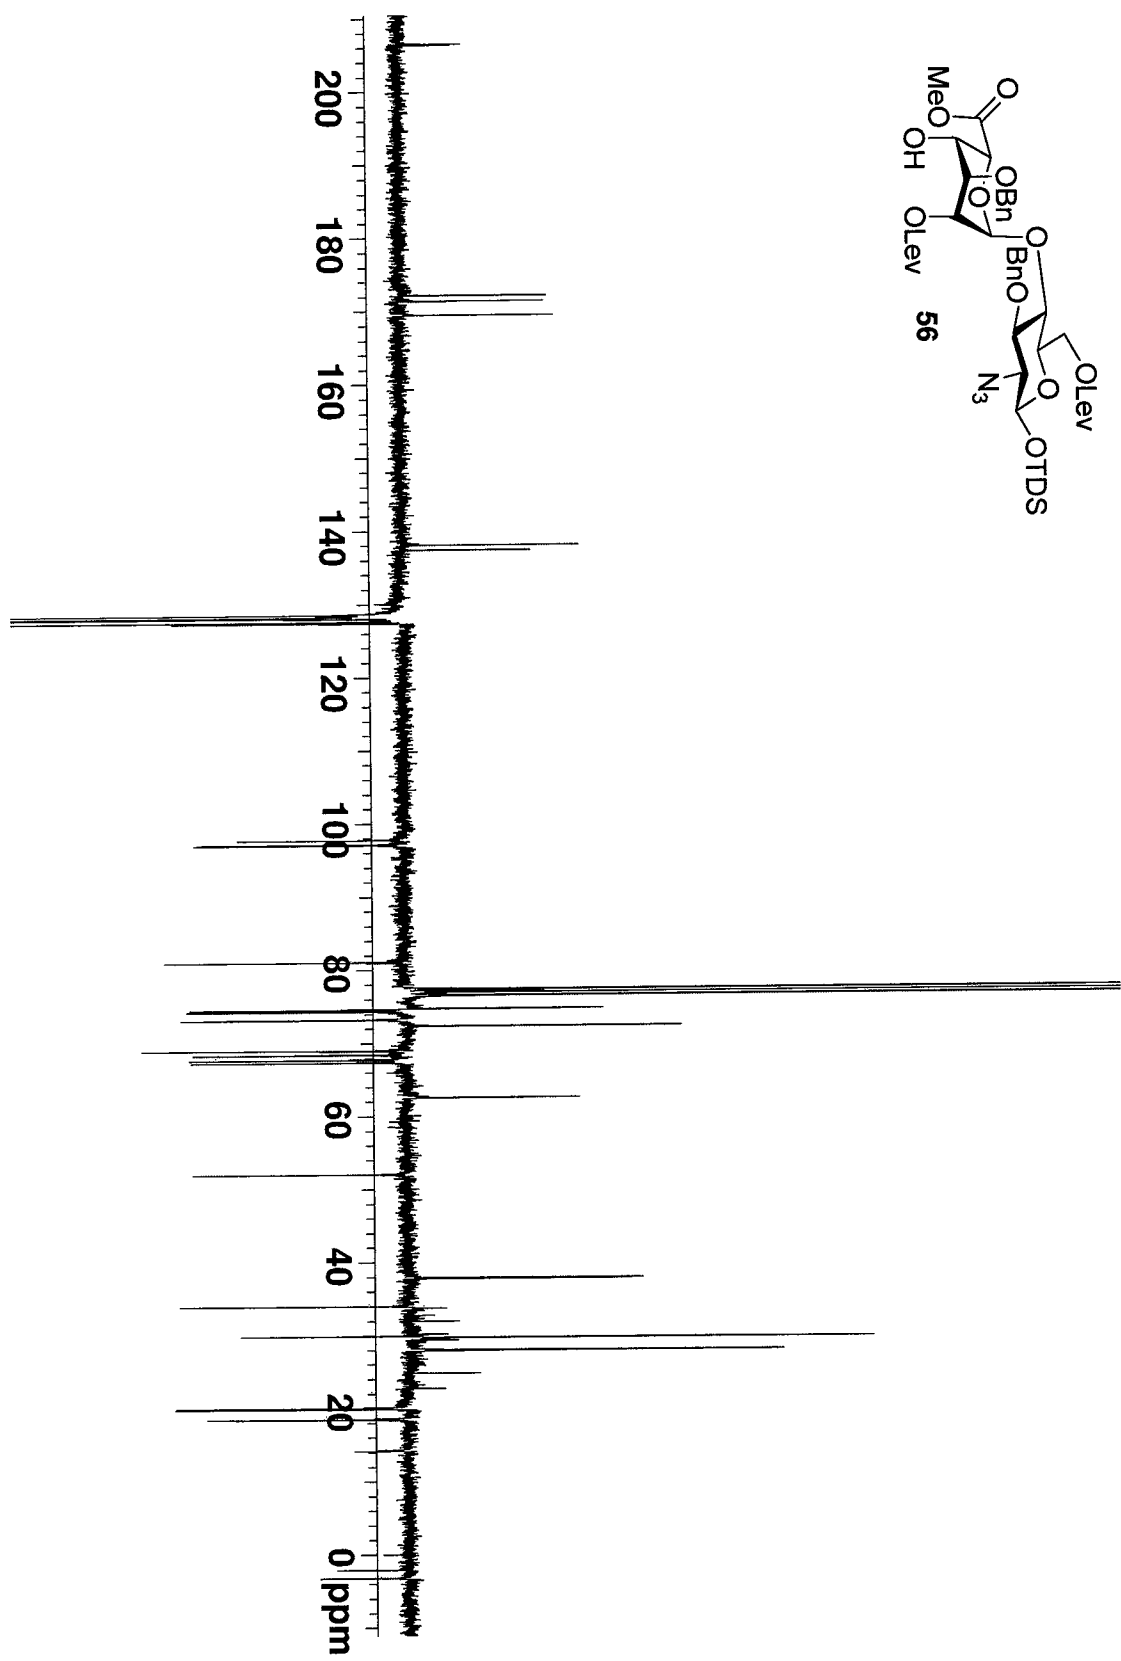

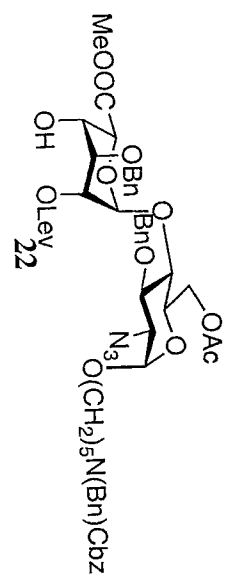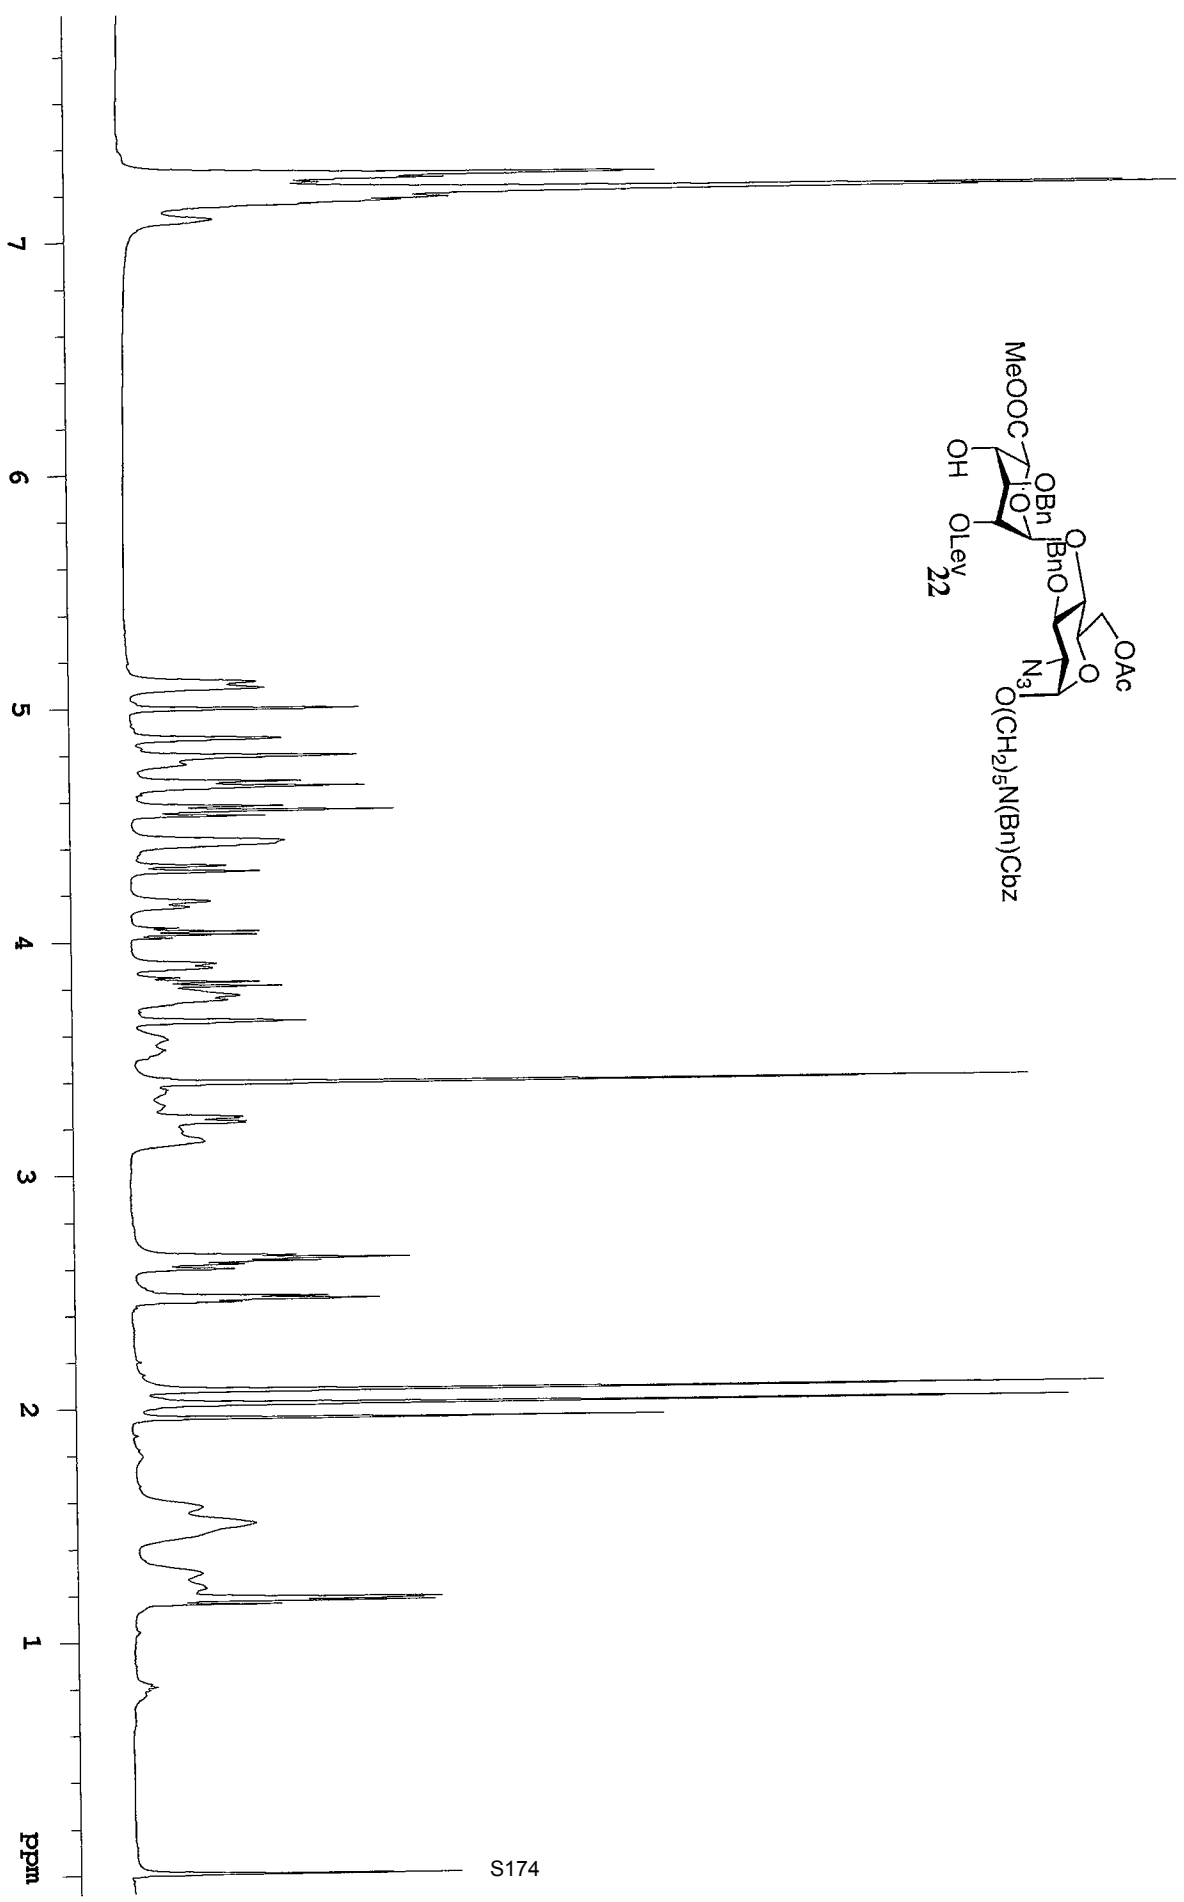

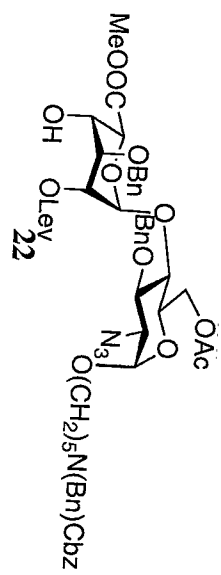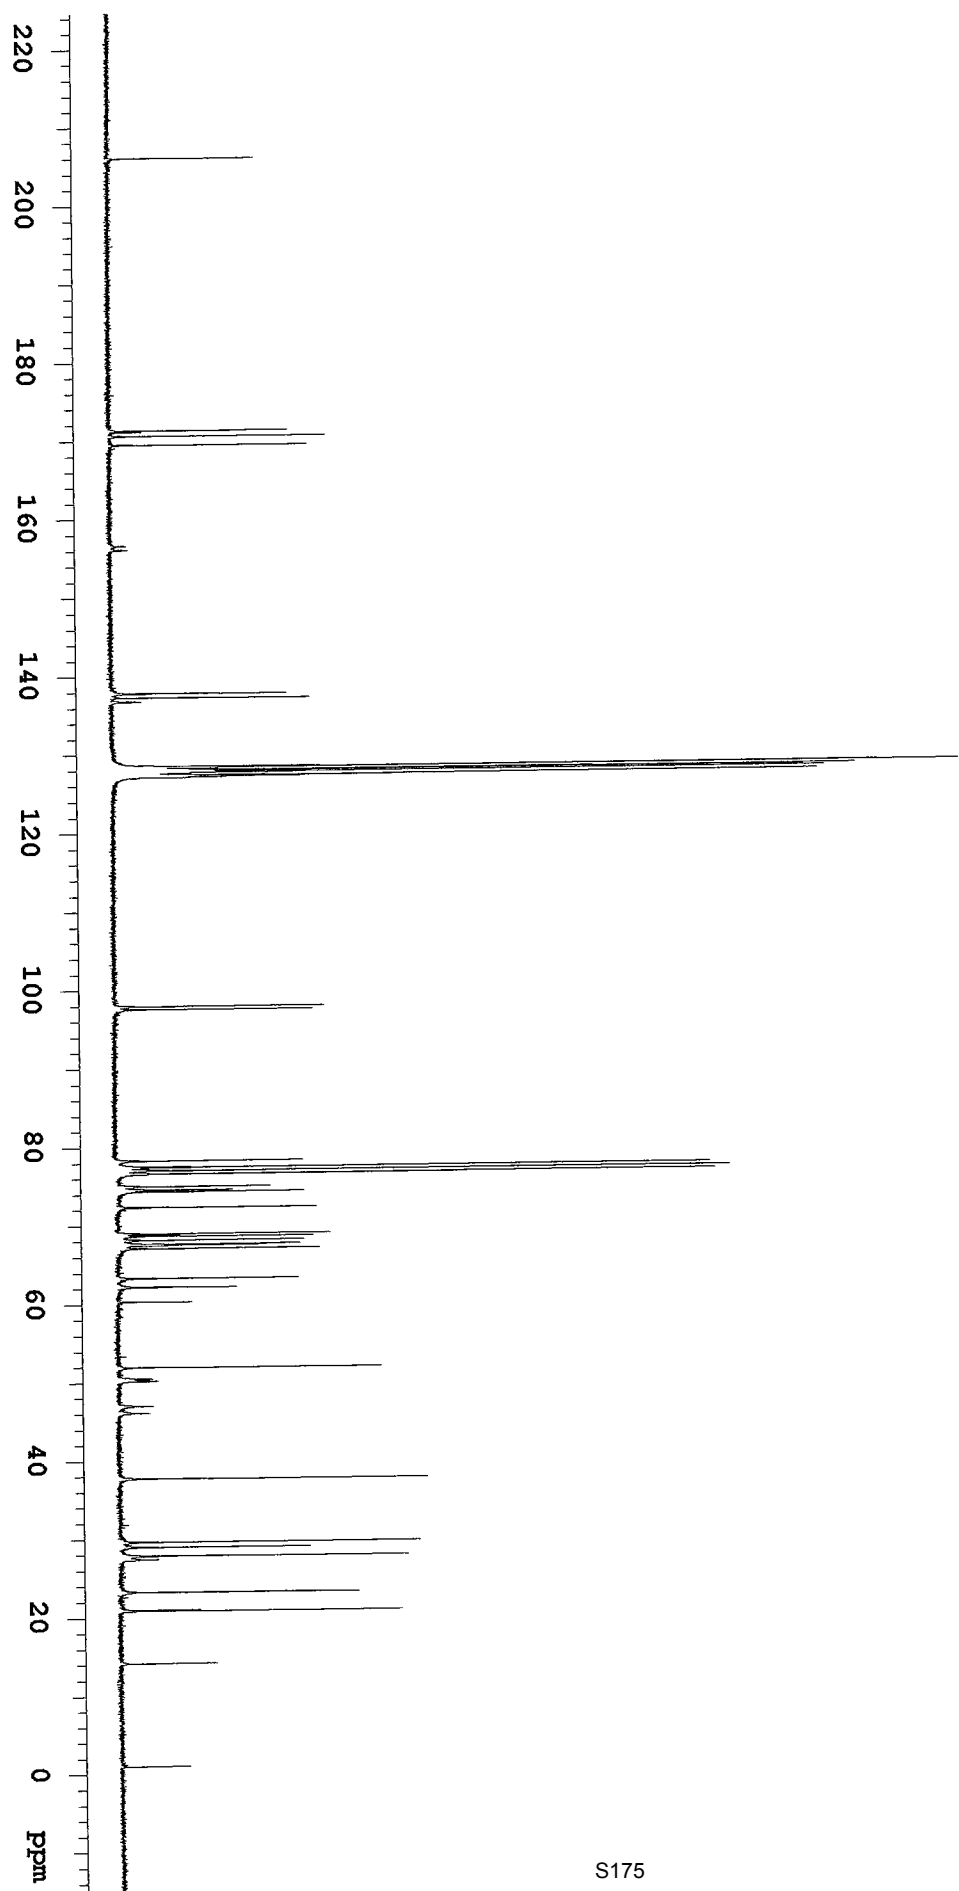

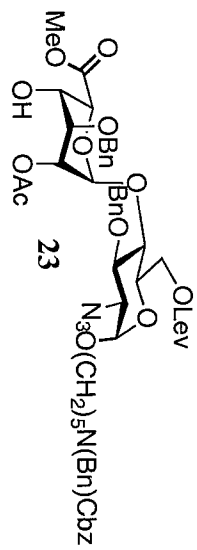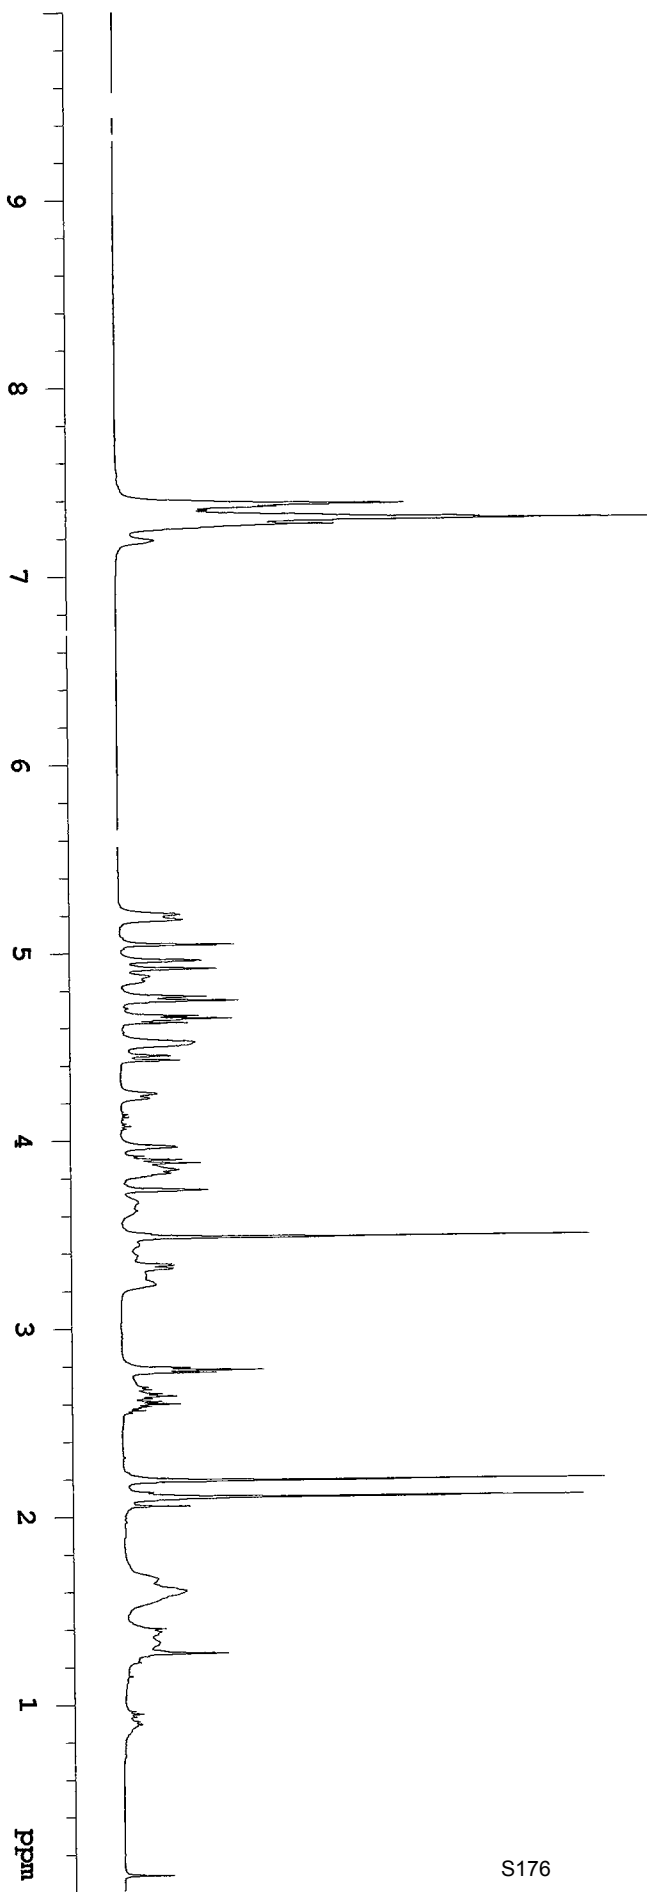



Pulse Sequence: s2pul

Solvent: cdcl3

Temp. 25.0 C / 298.1 K

Relax. delay 1.000 sec

Pulse 45.0 degrees

Acq. time 1.301 sec

Width 18115.9 Hz

20000 repetitions

OBSERVE C13, 75.4528952 MHz

DECOUPLE H1, 300.0720883 MHz

Power 37 dB

continuously on

WALTZ-16 modulated

DATA PROCESSING

Line broadening 0.5 Hz

FT size 65536

Total time 12 hr, 49 min, 46 sec

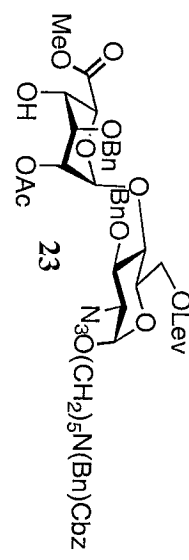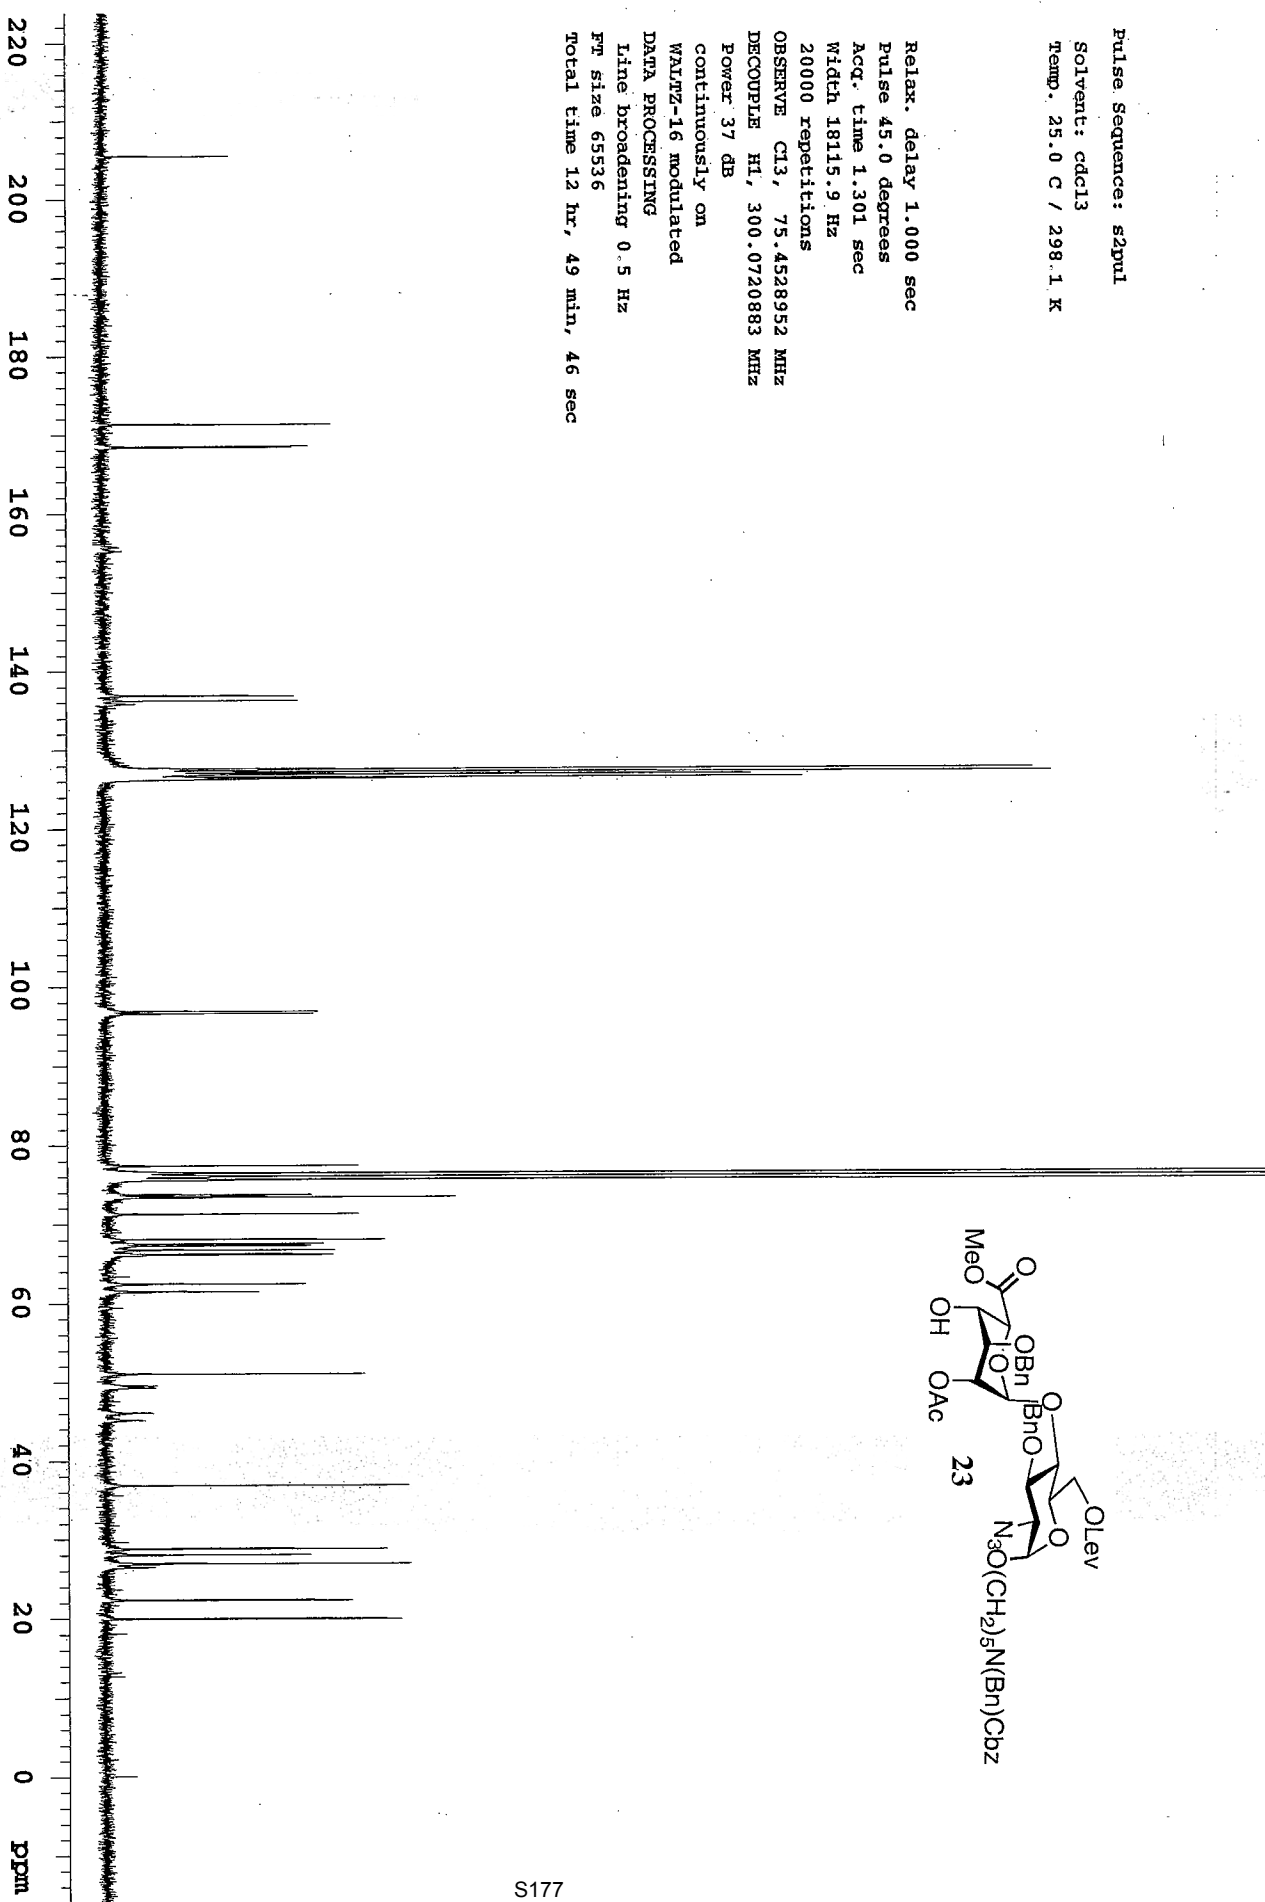

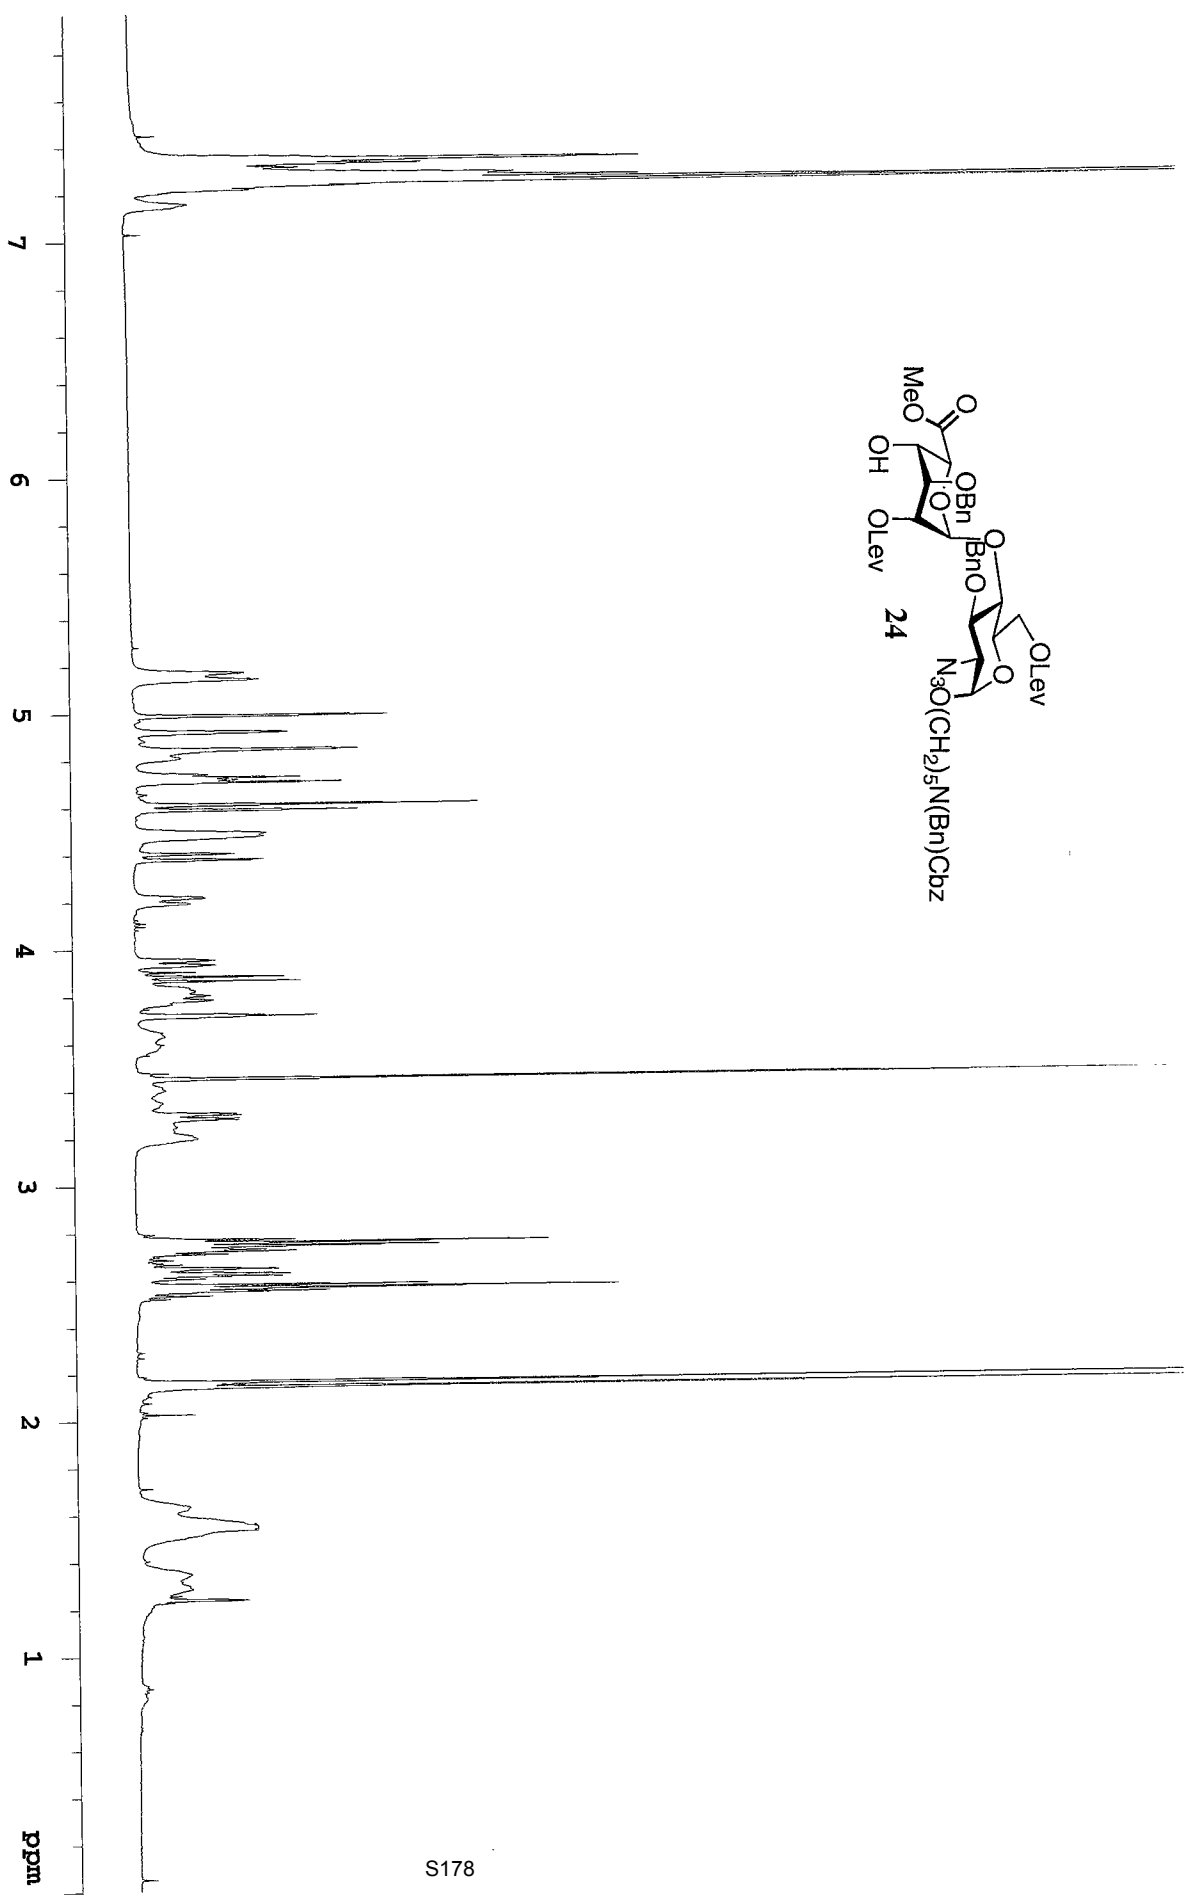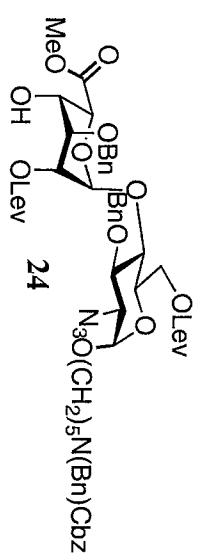

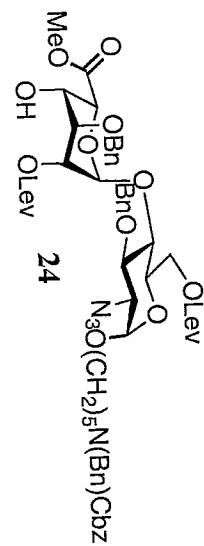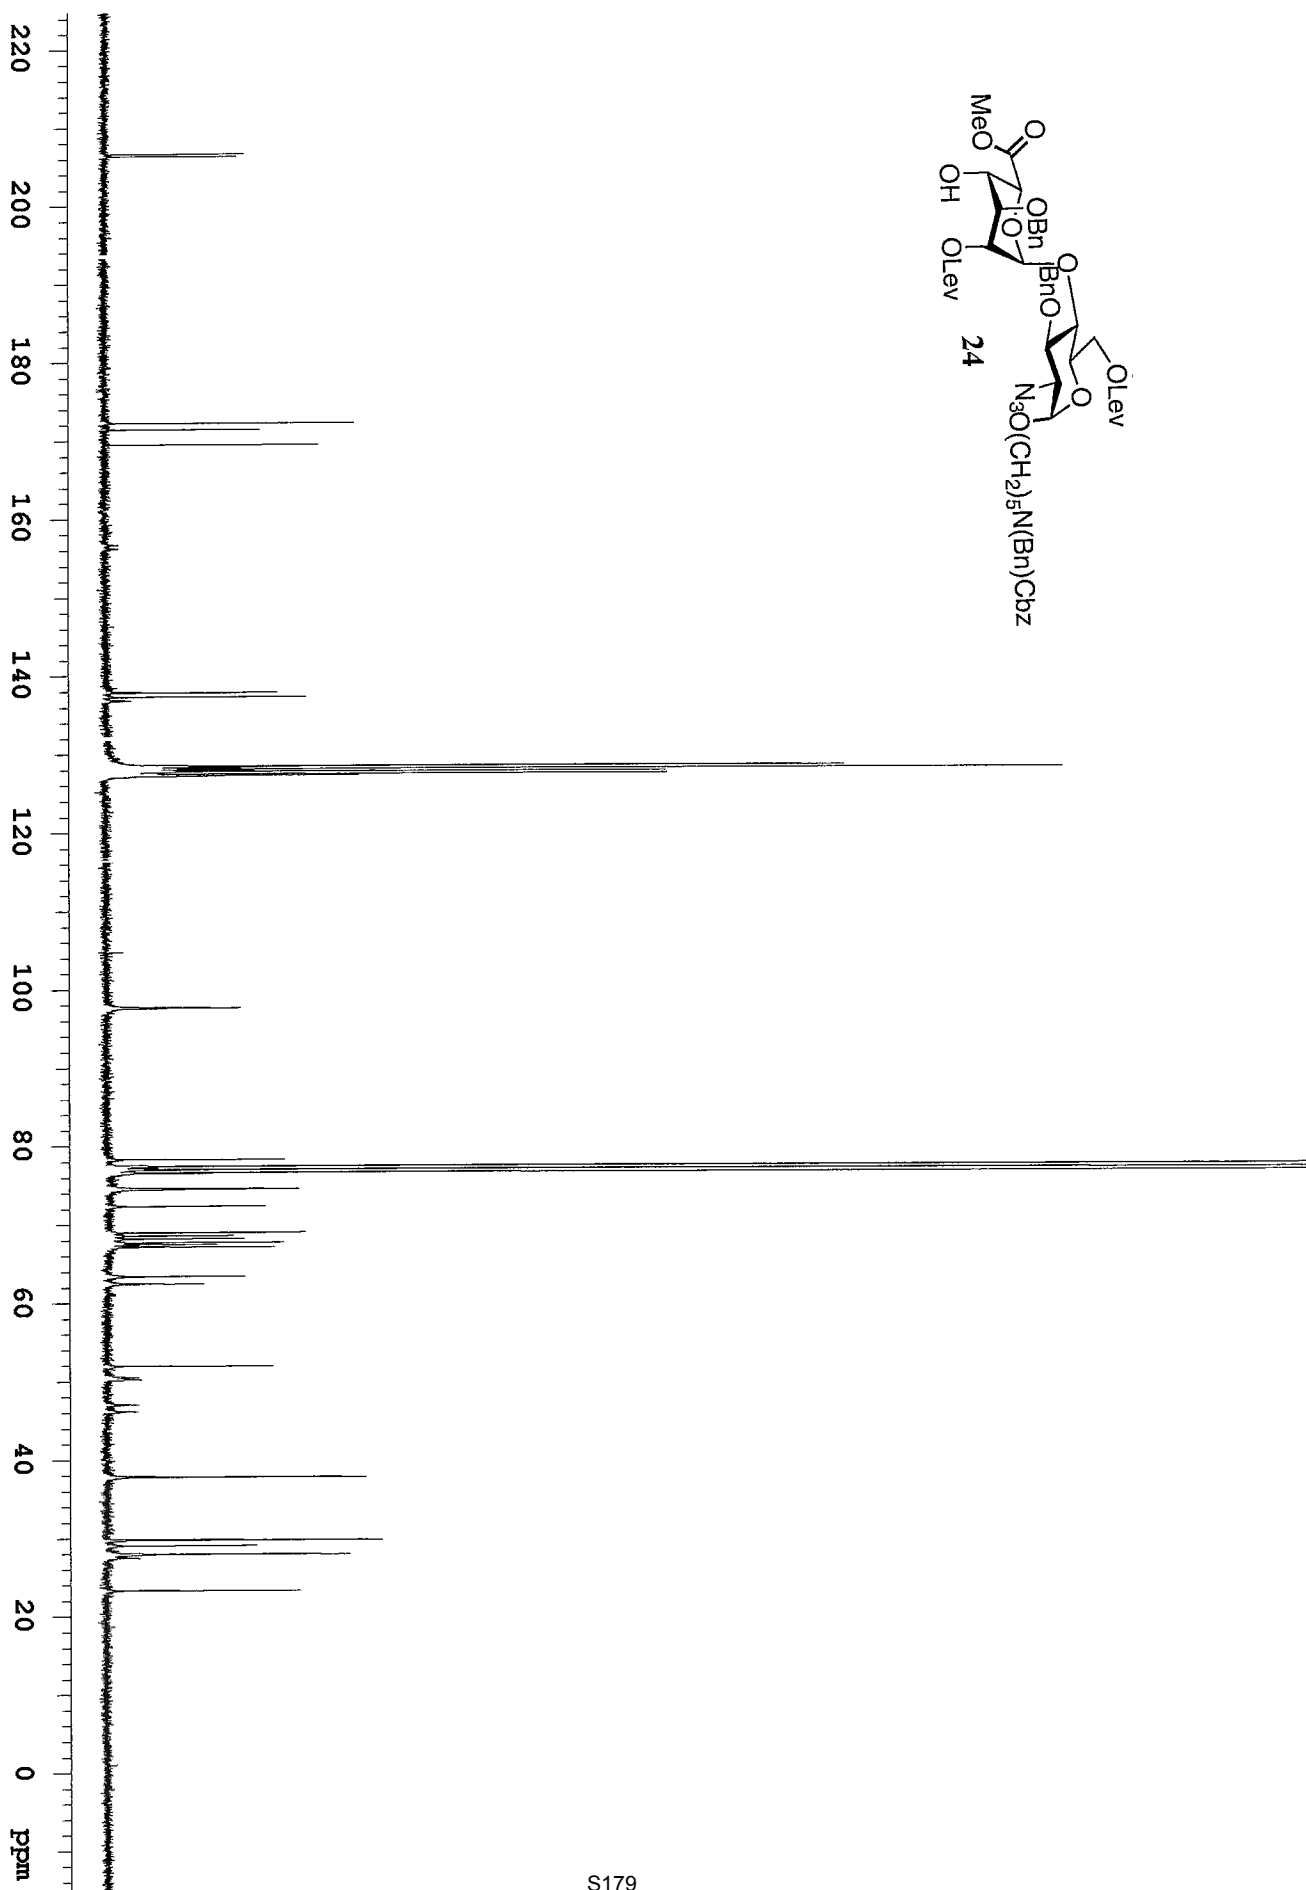

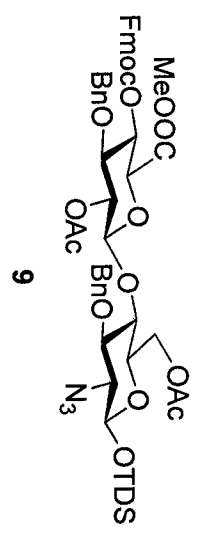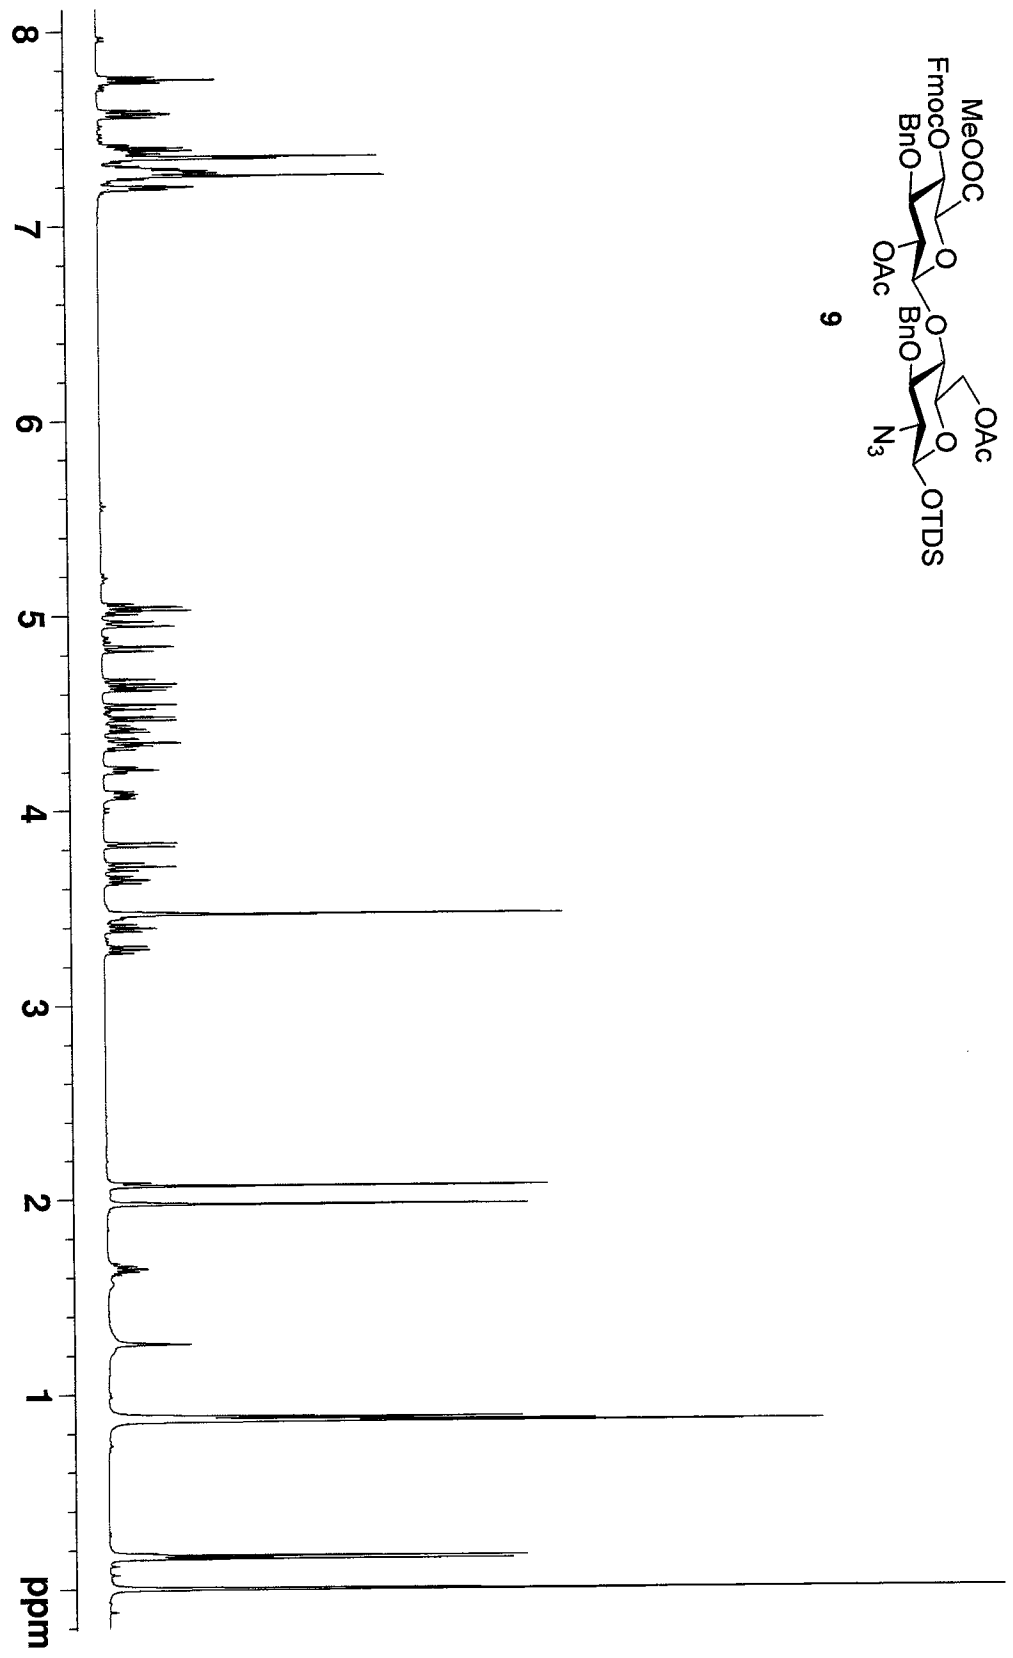

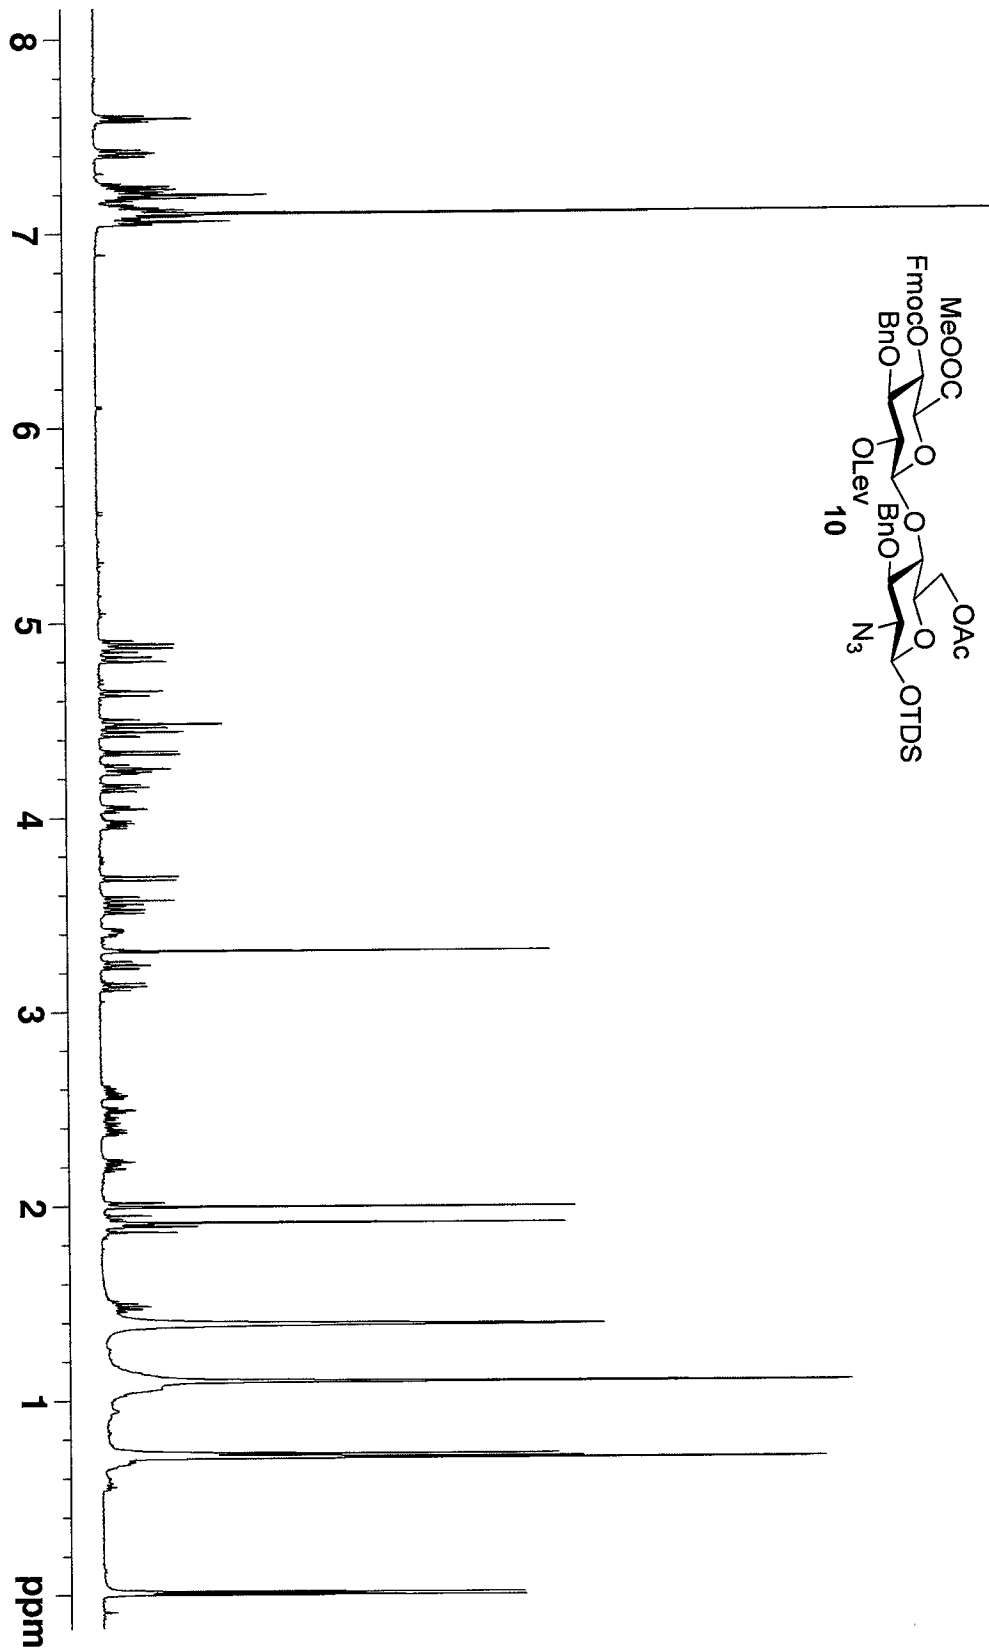

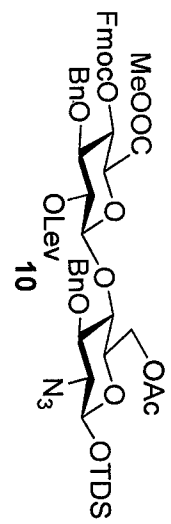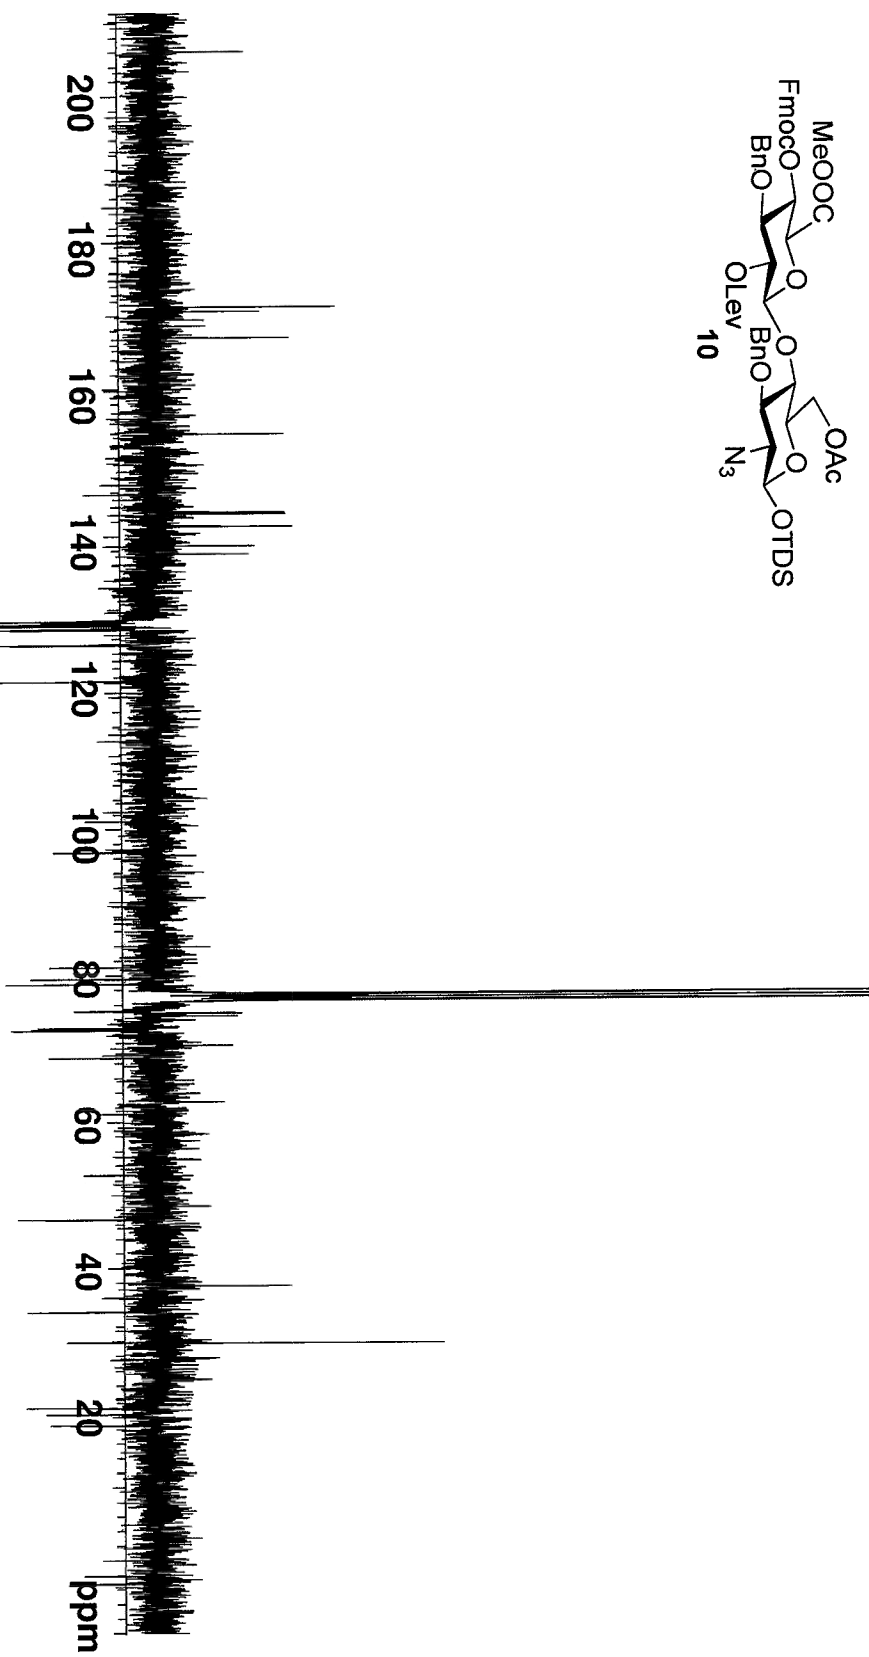

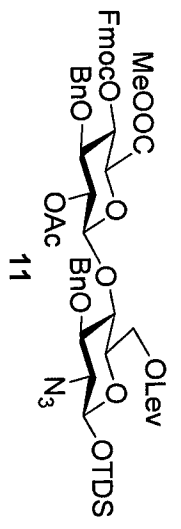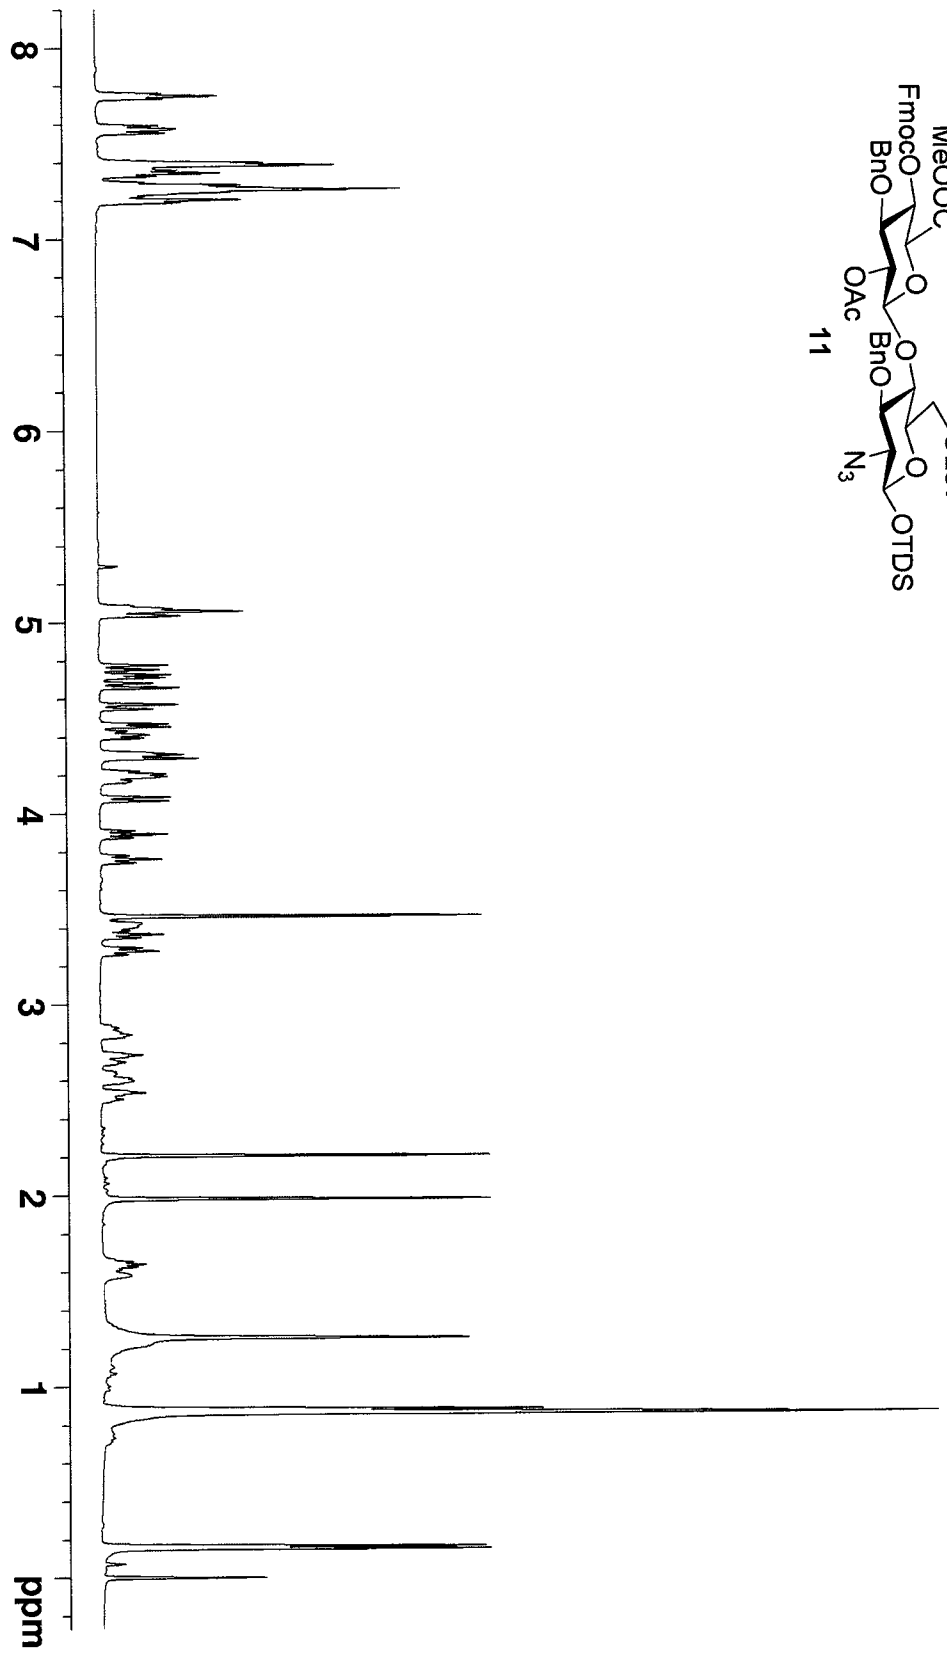

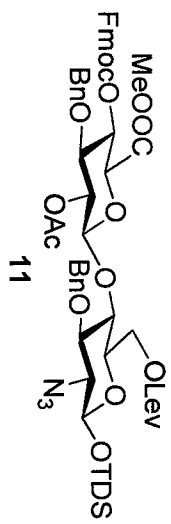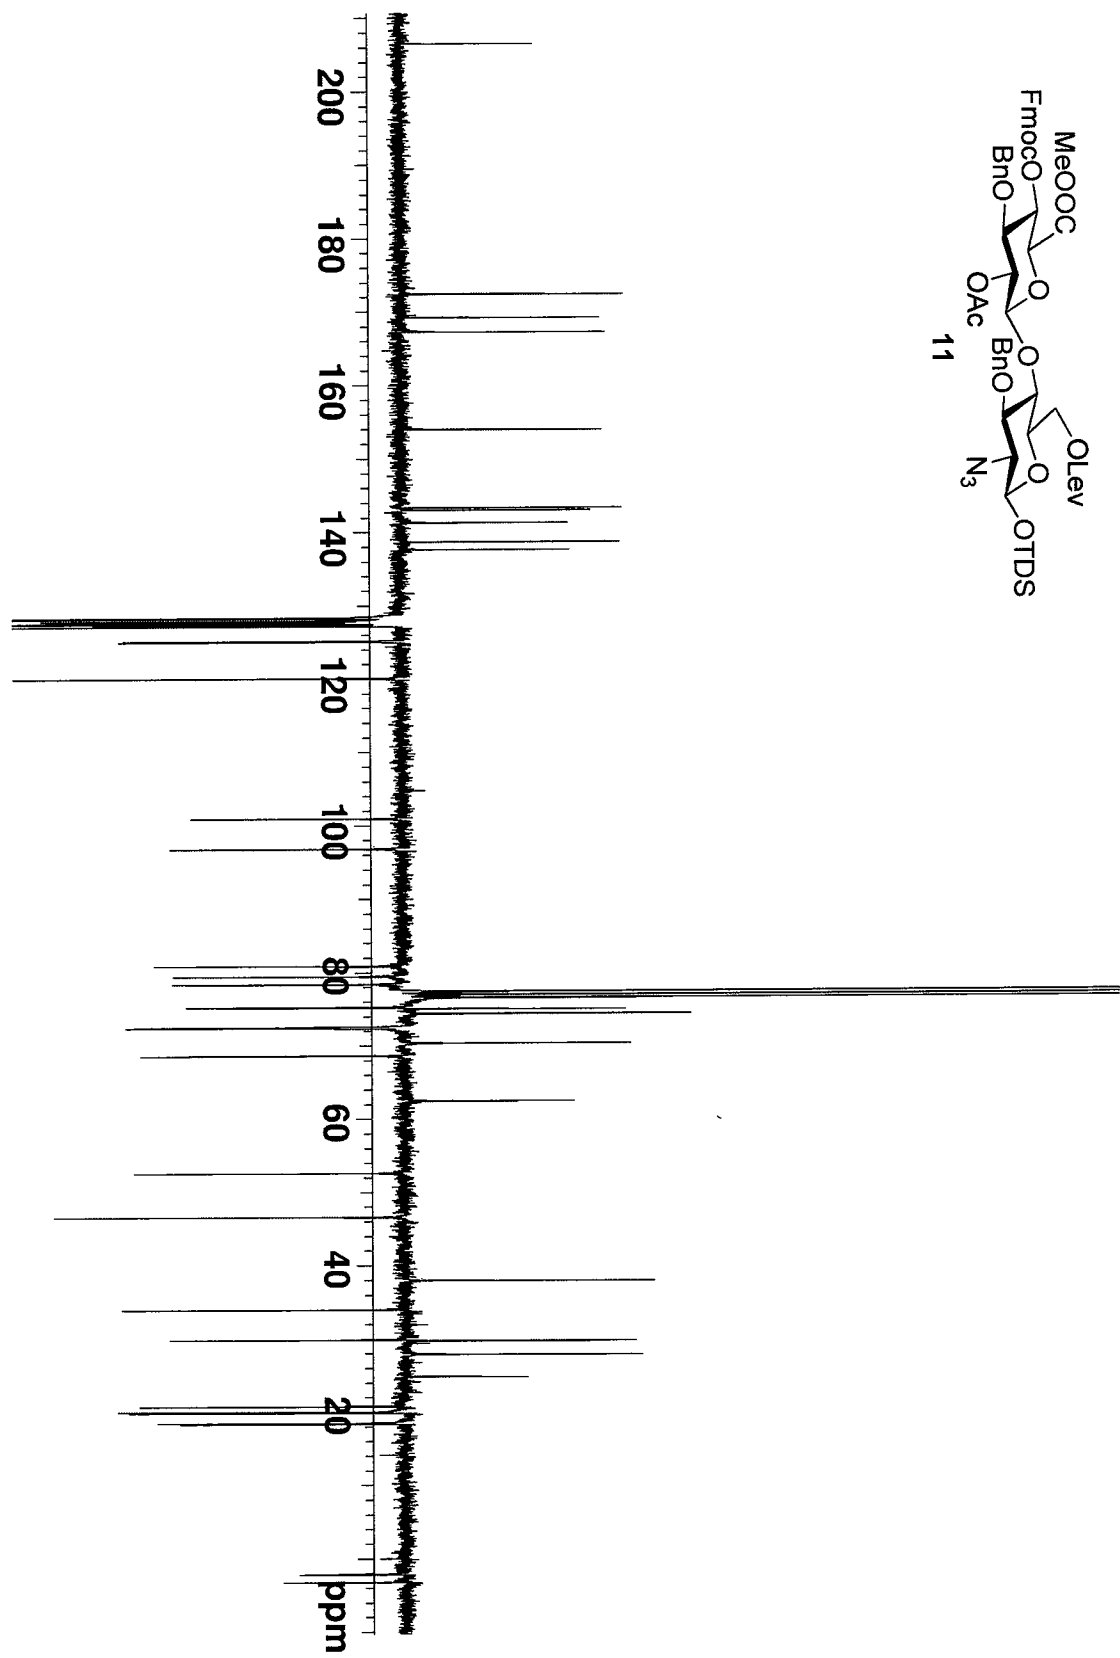



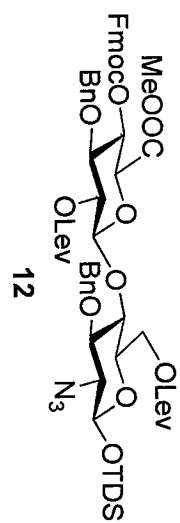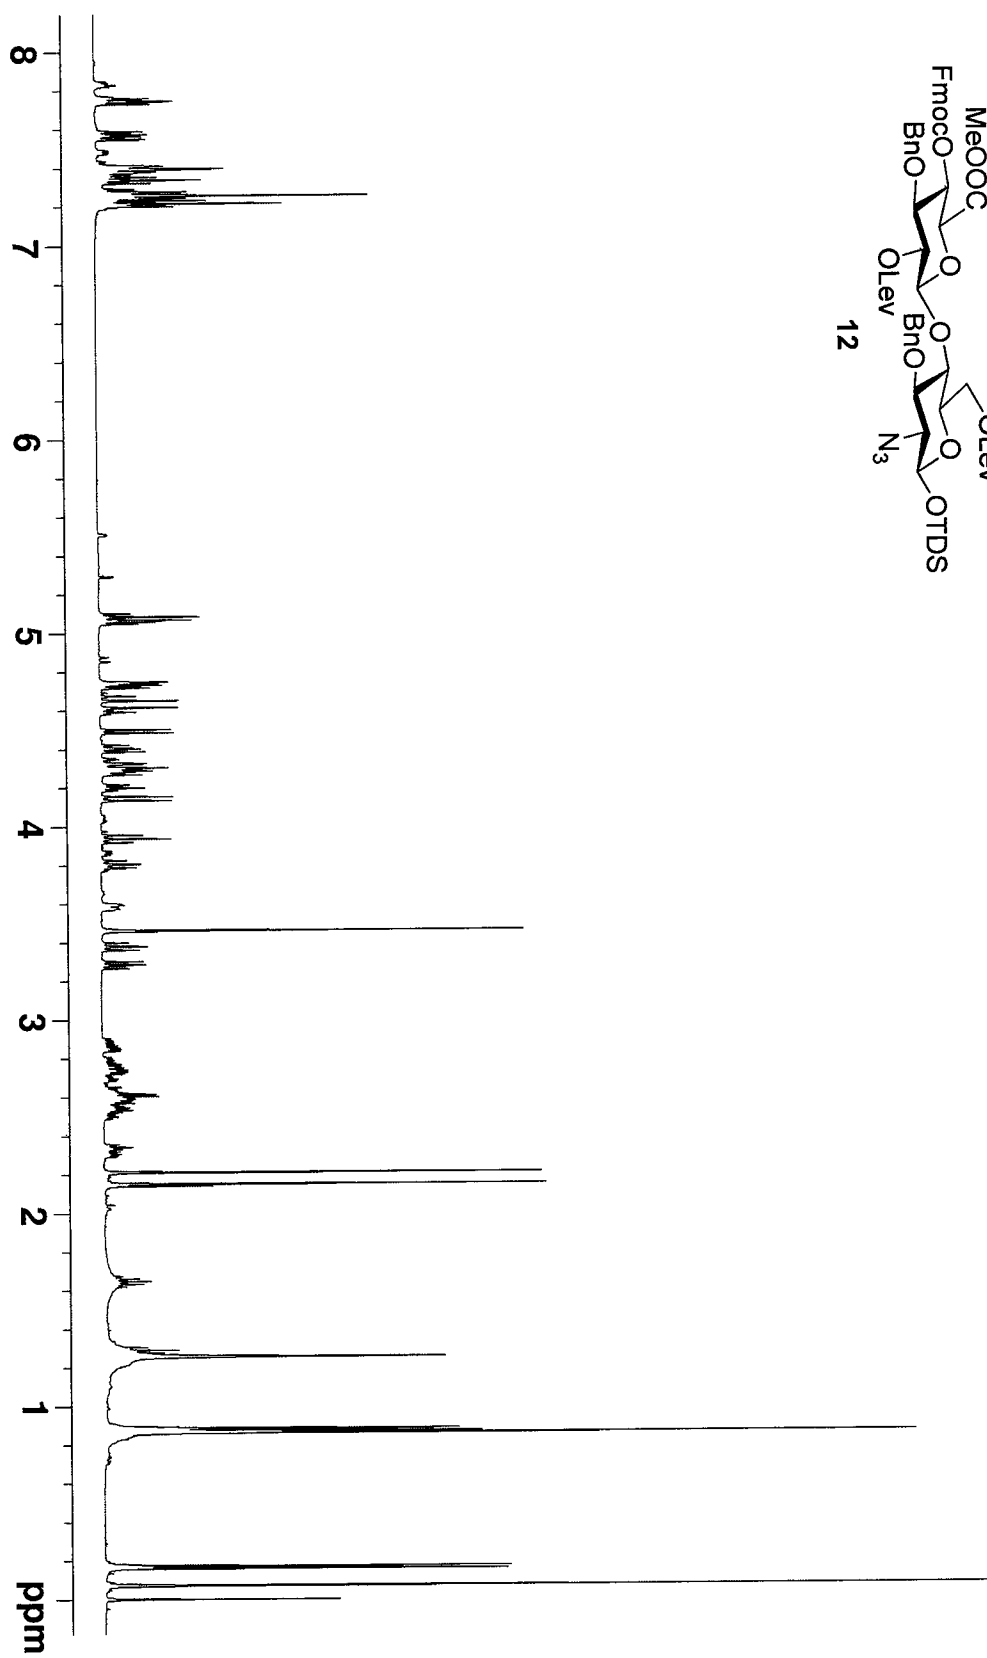

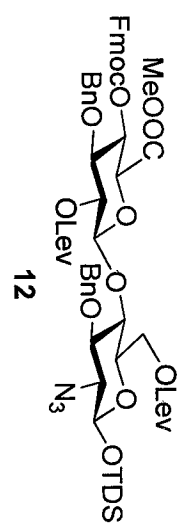

12

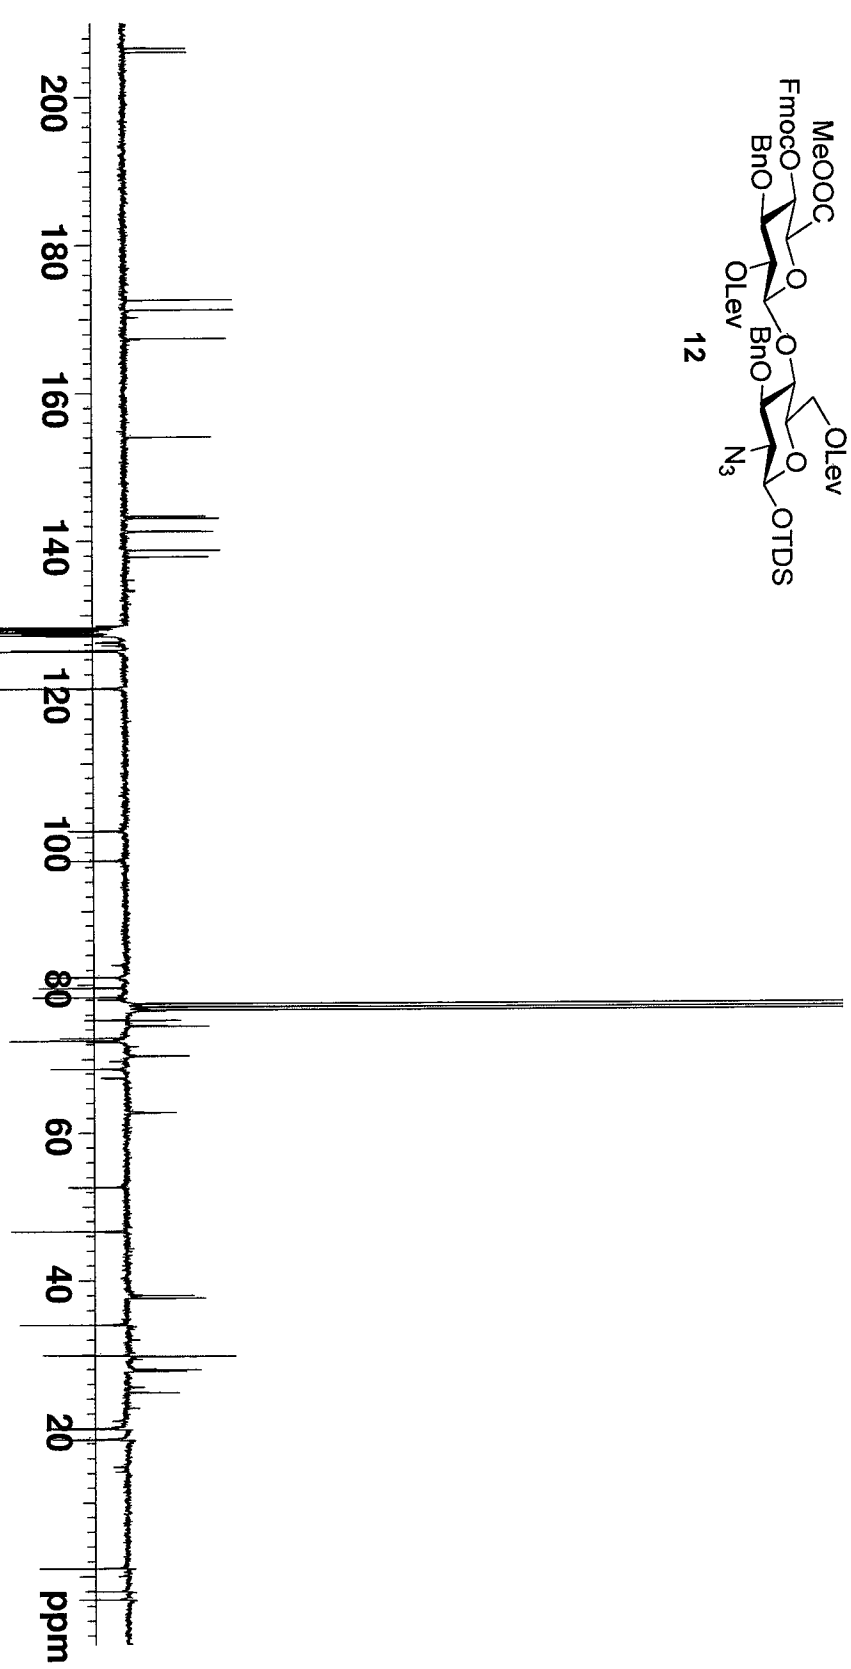

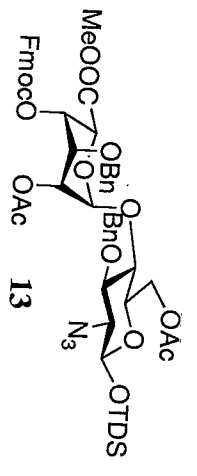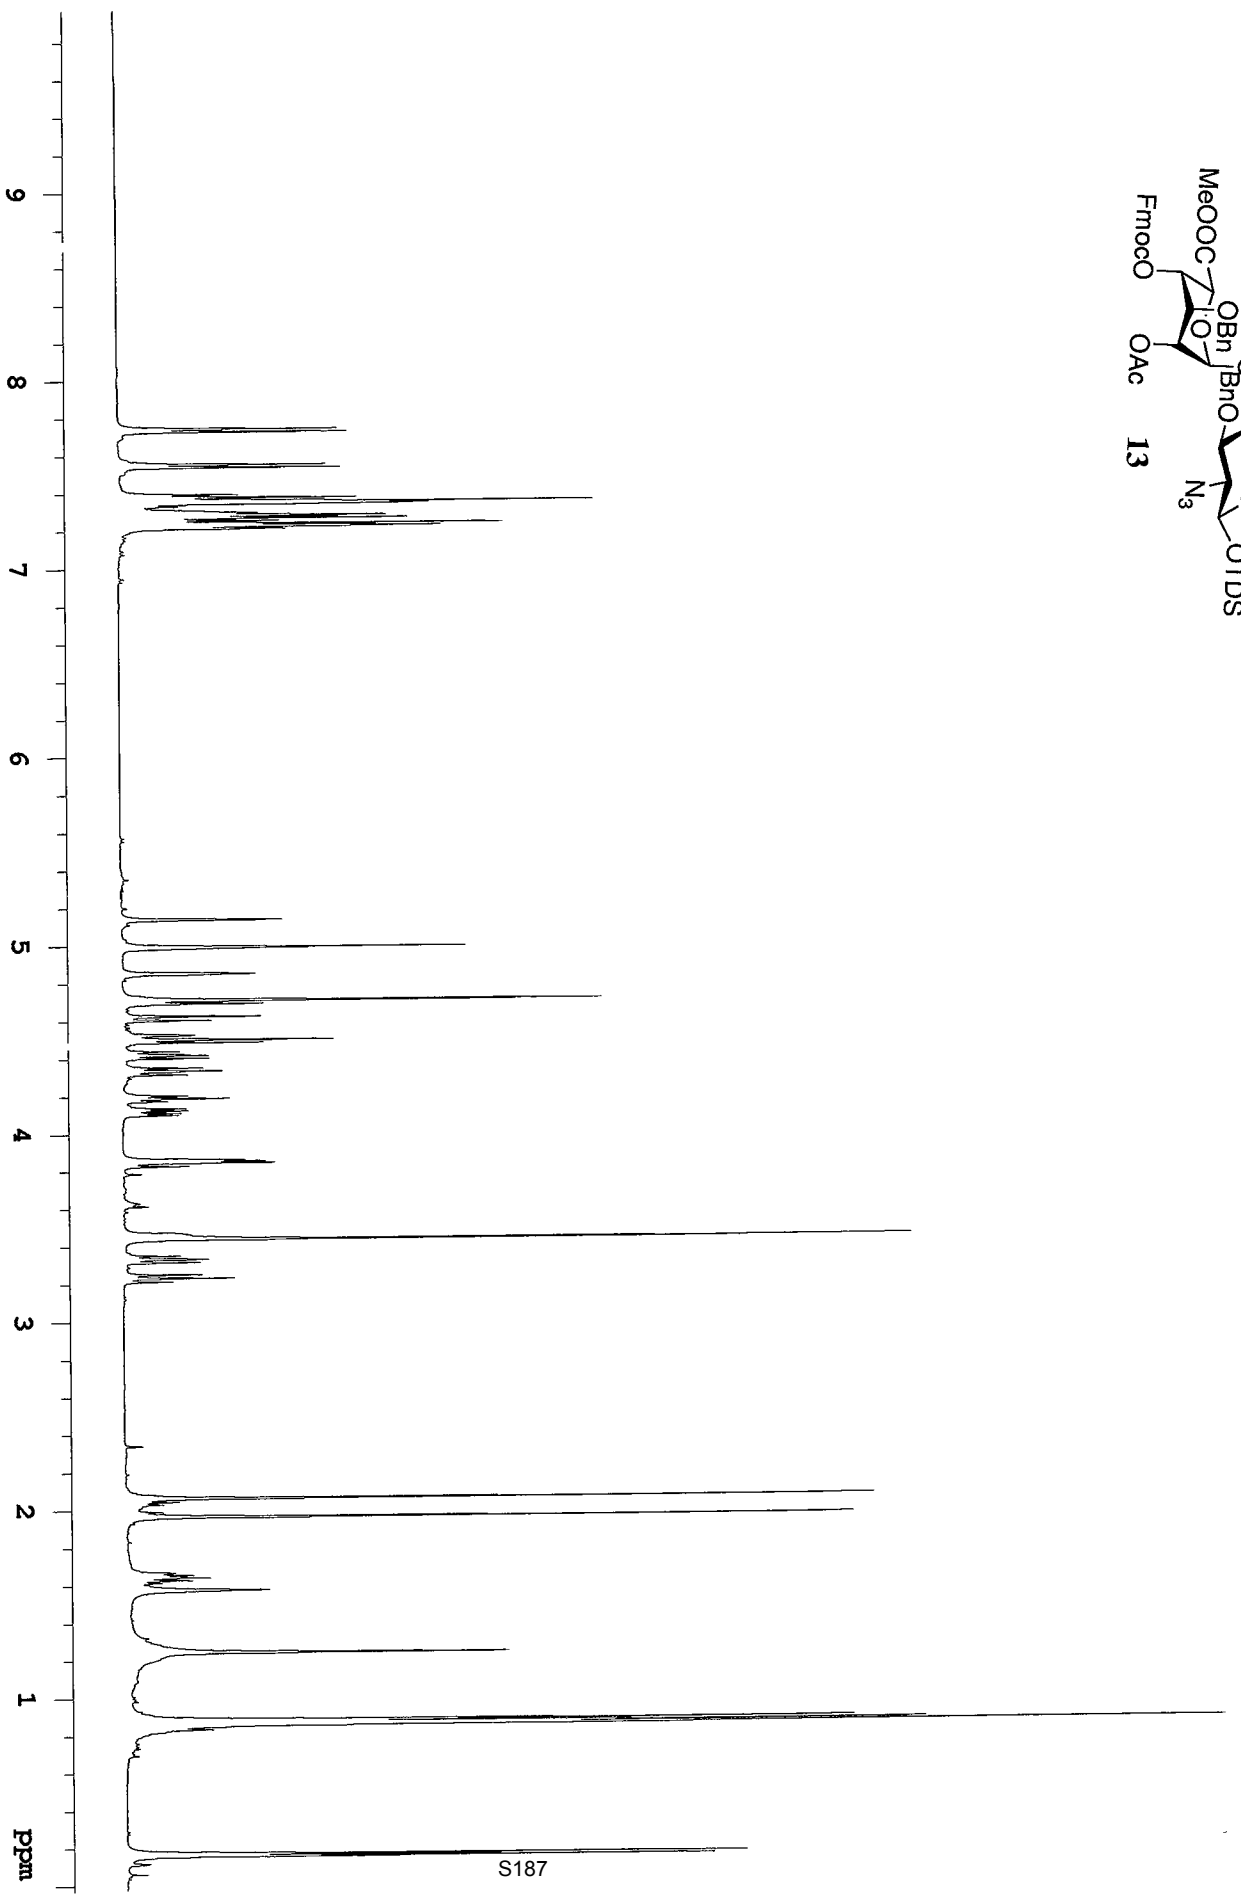

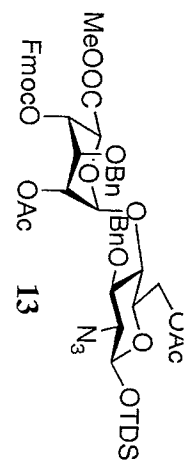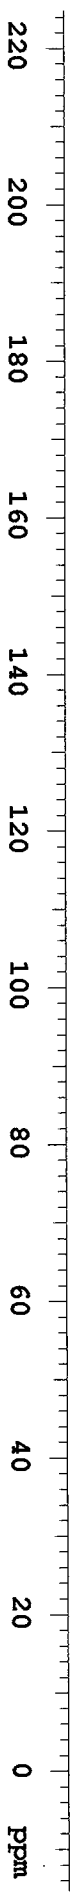

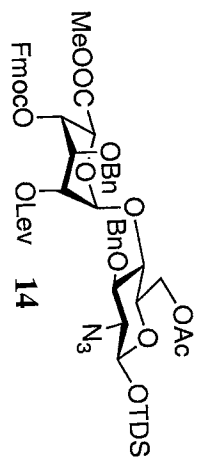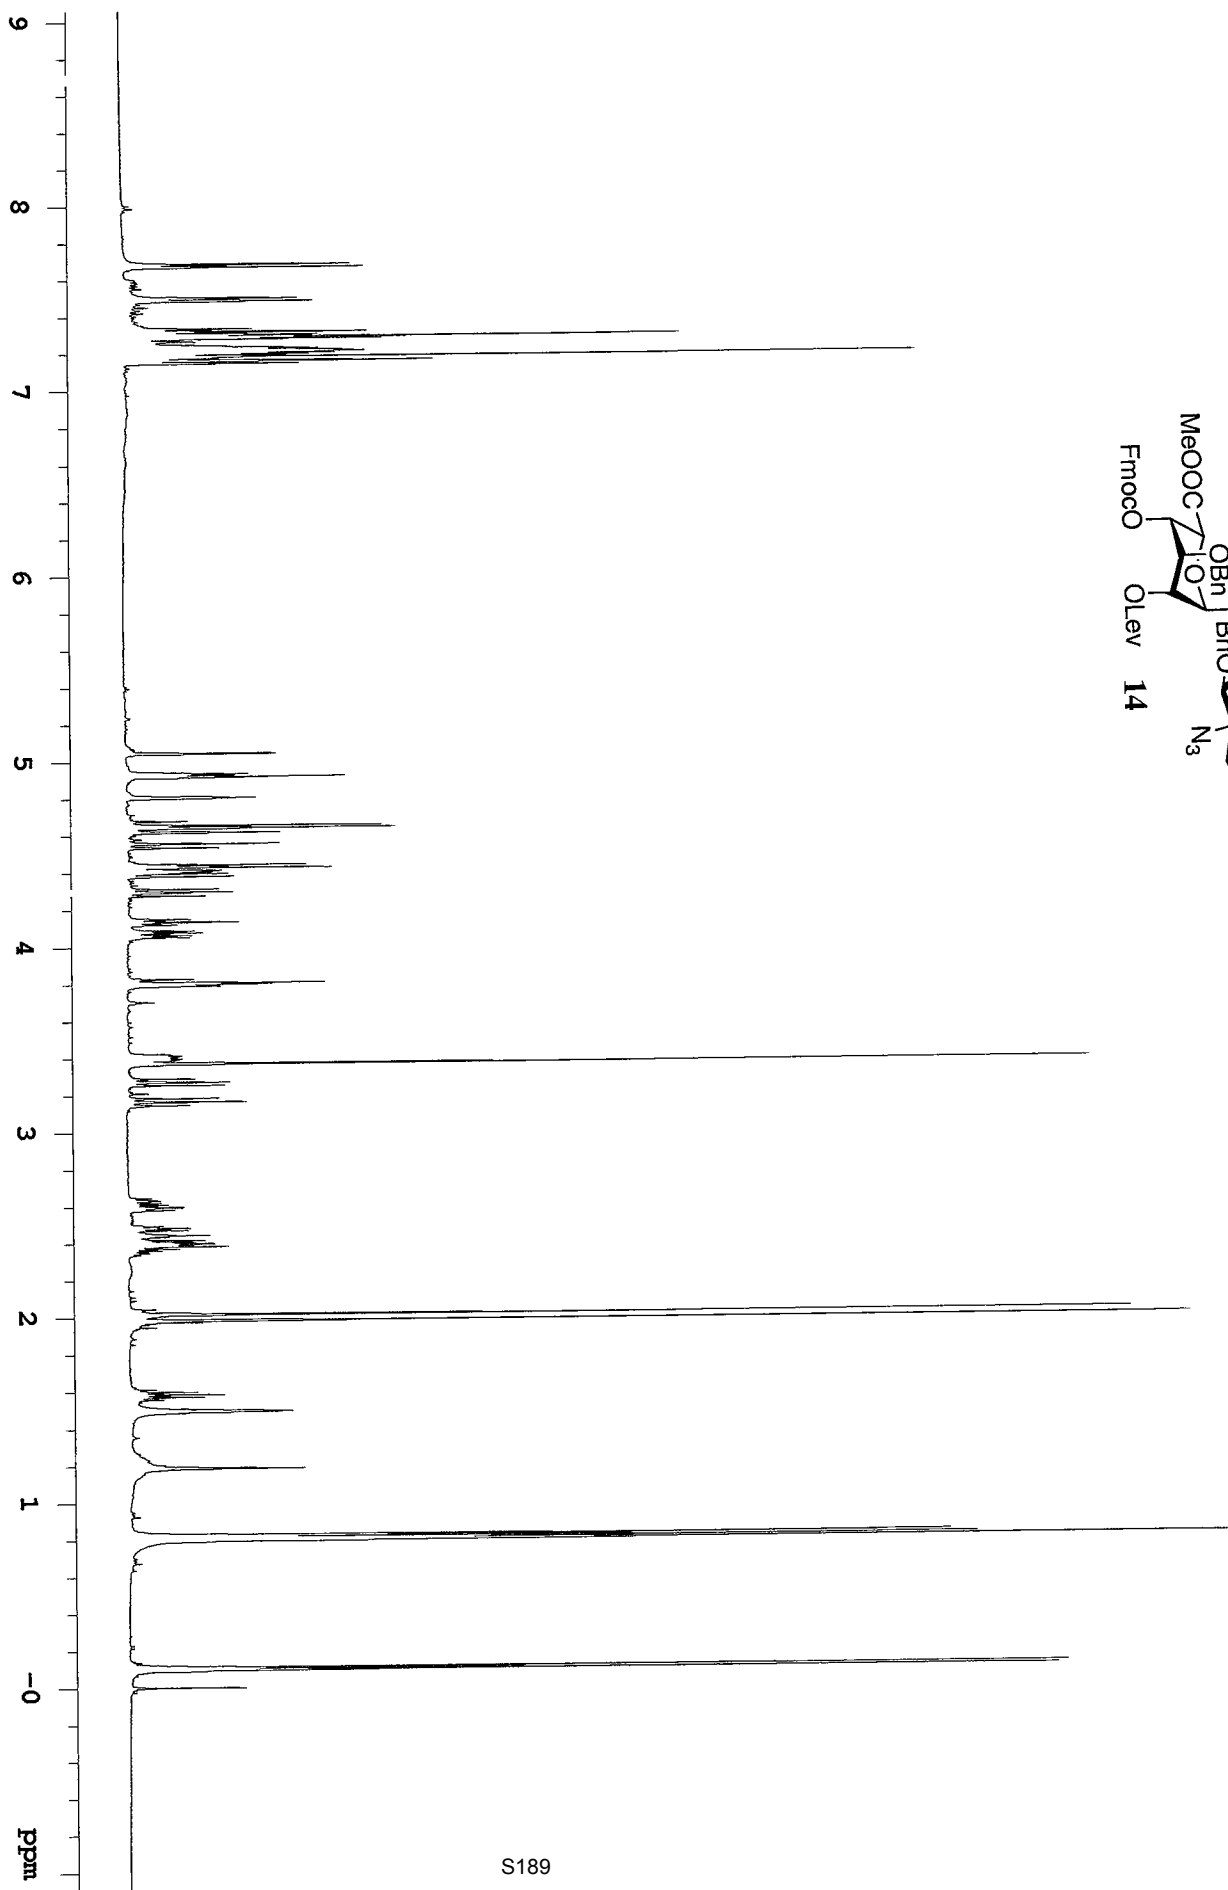

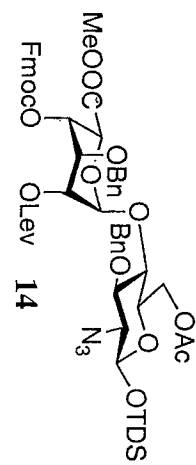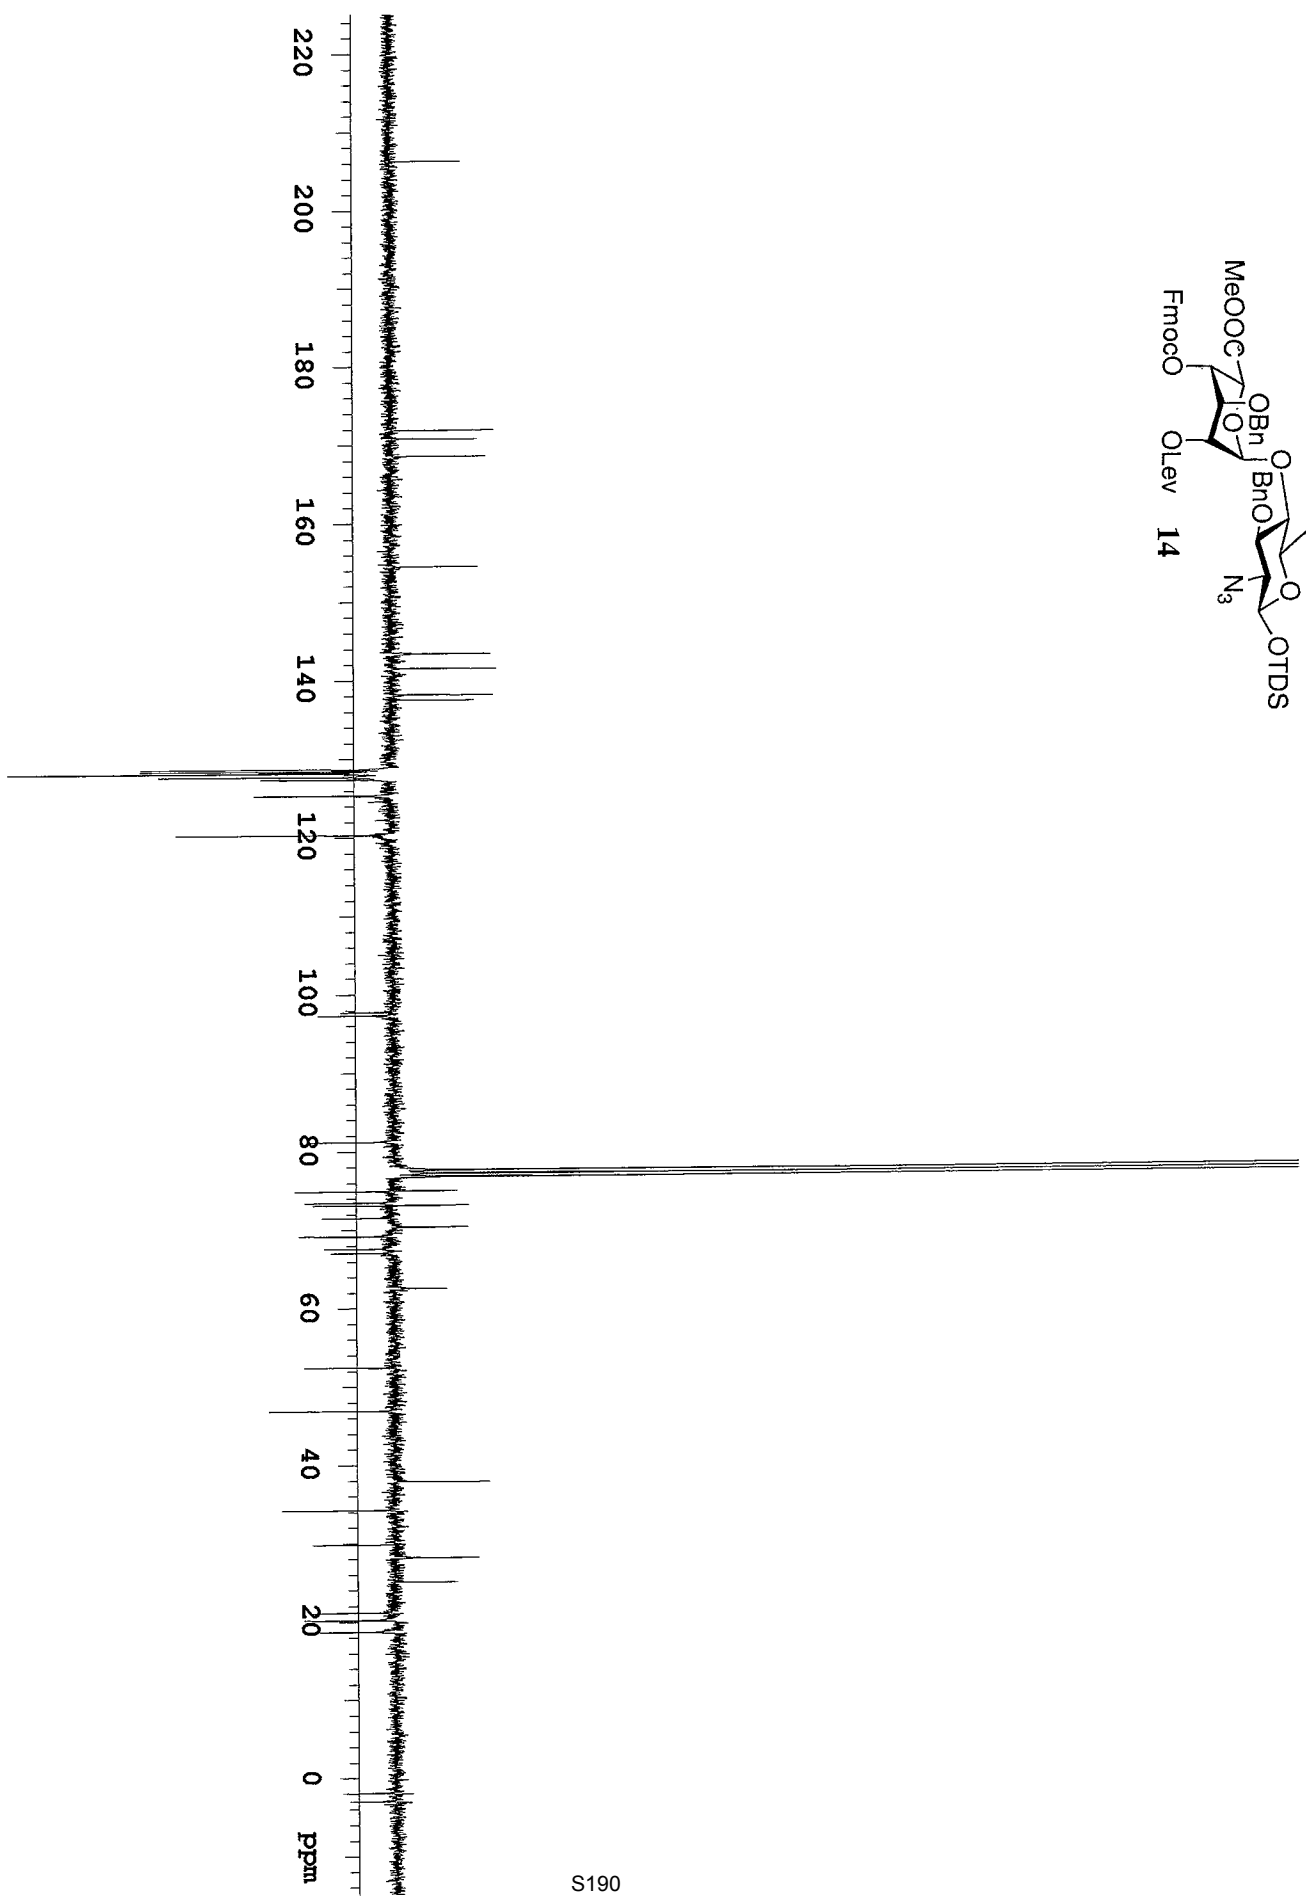

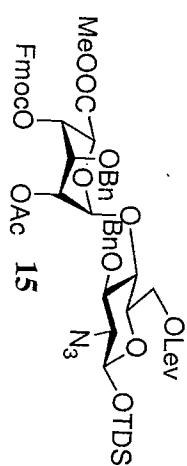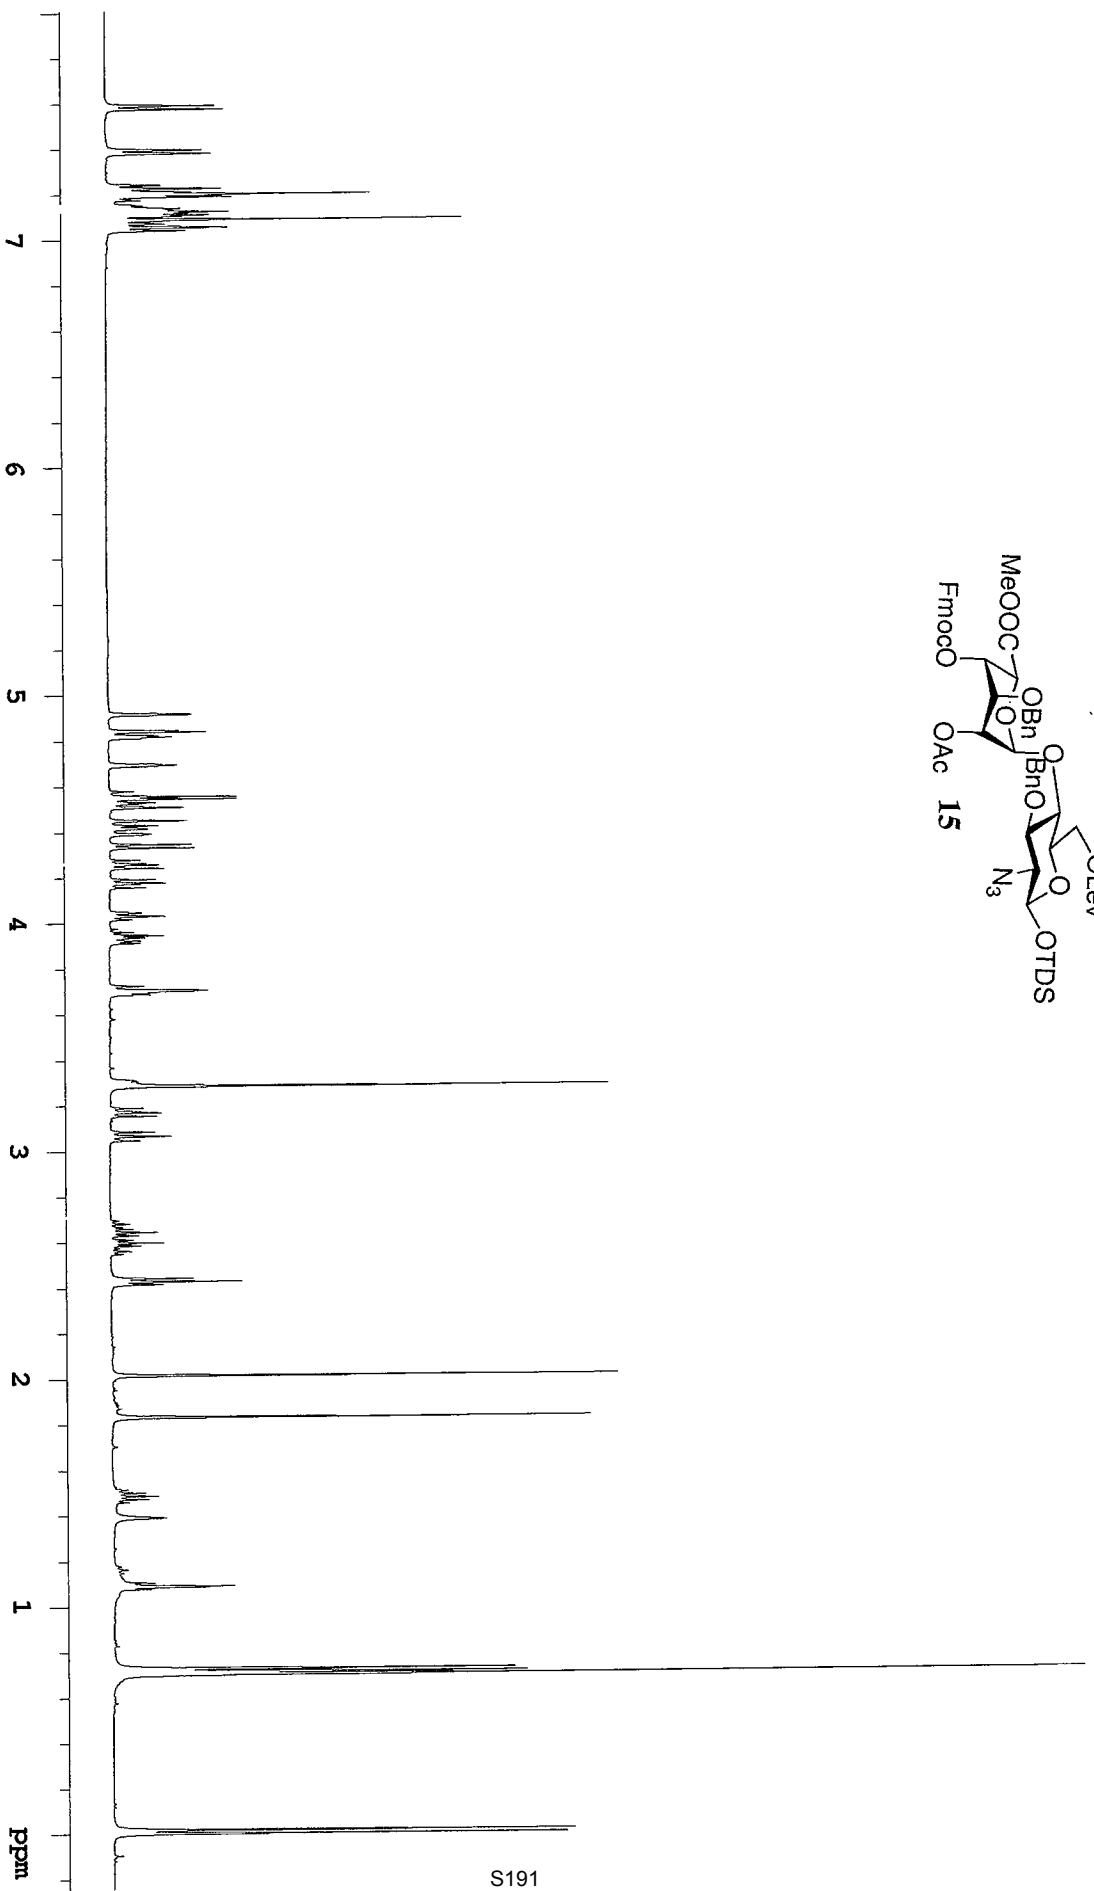

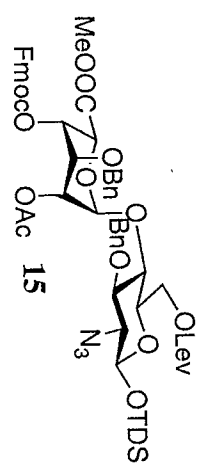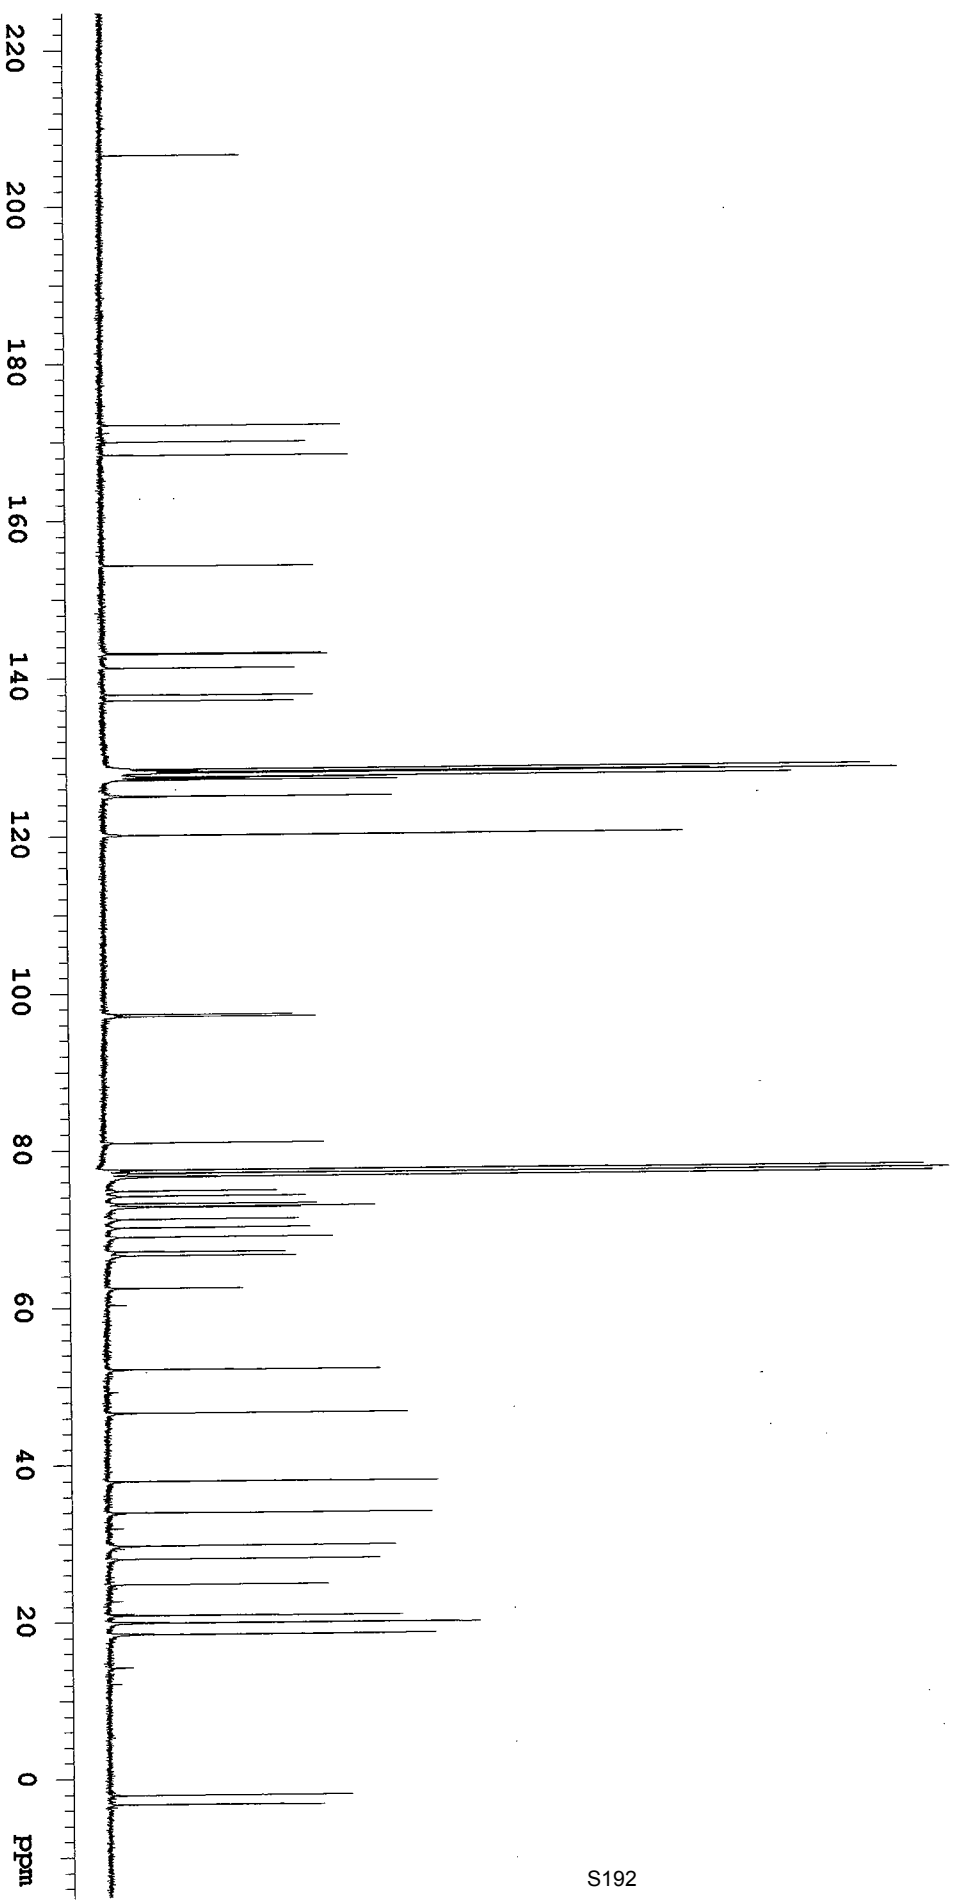



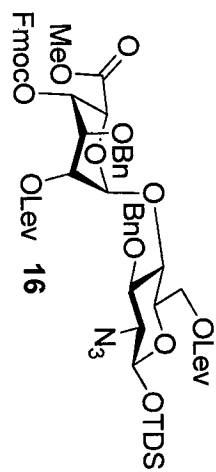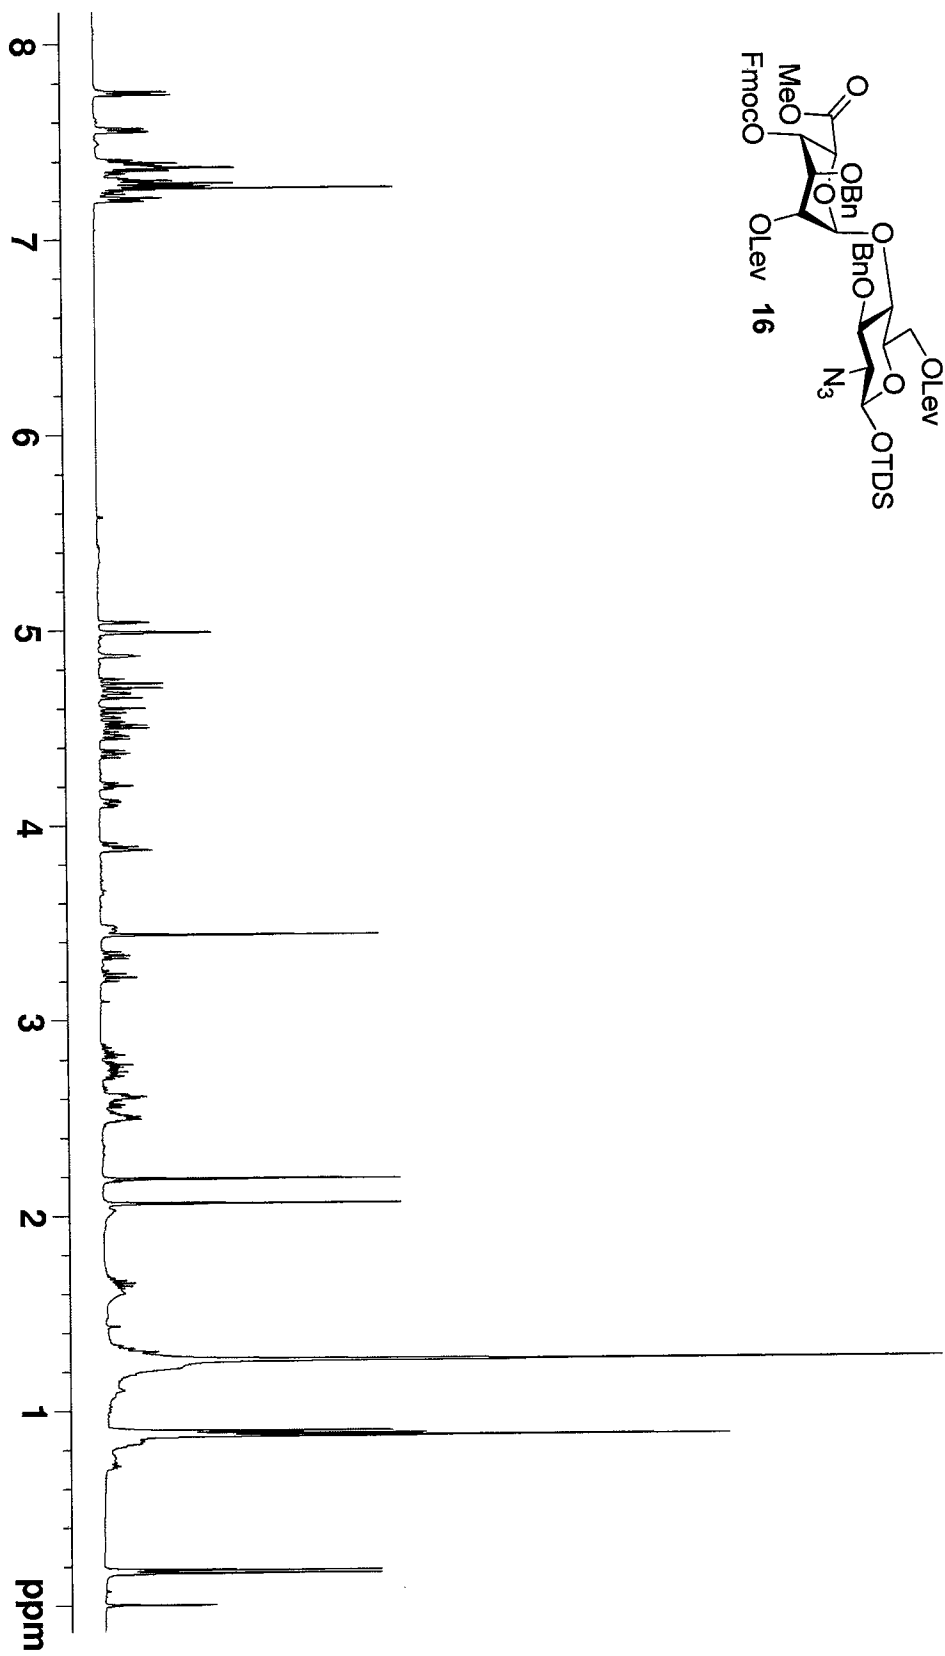

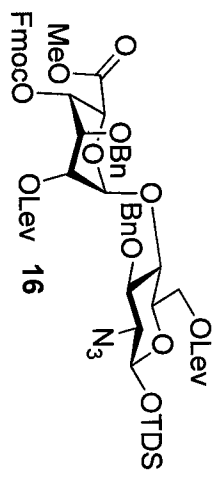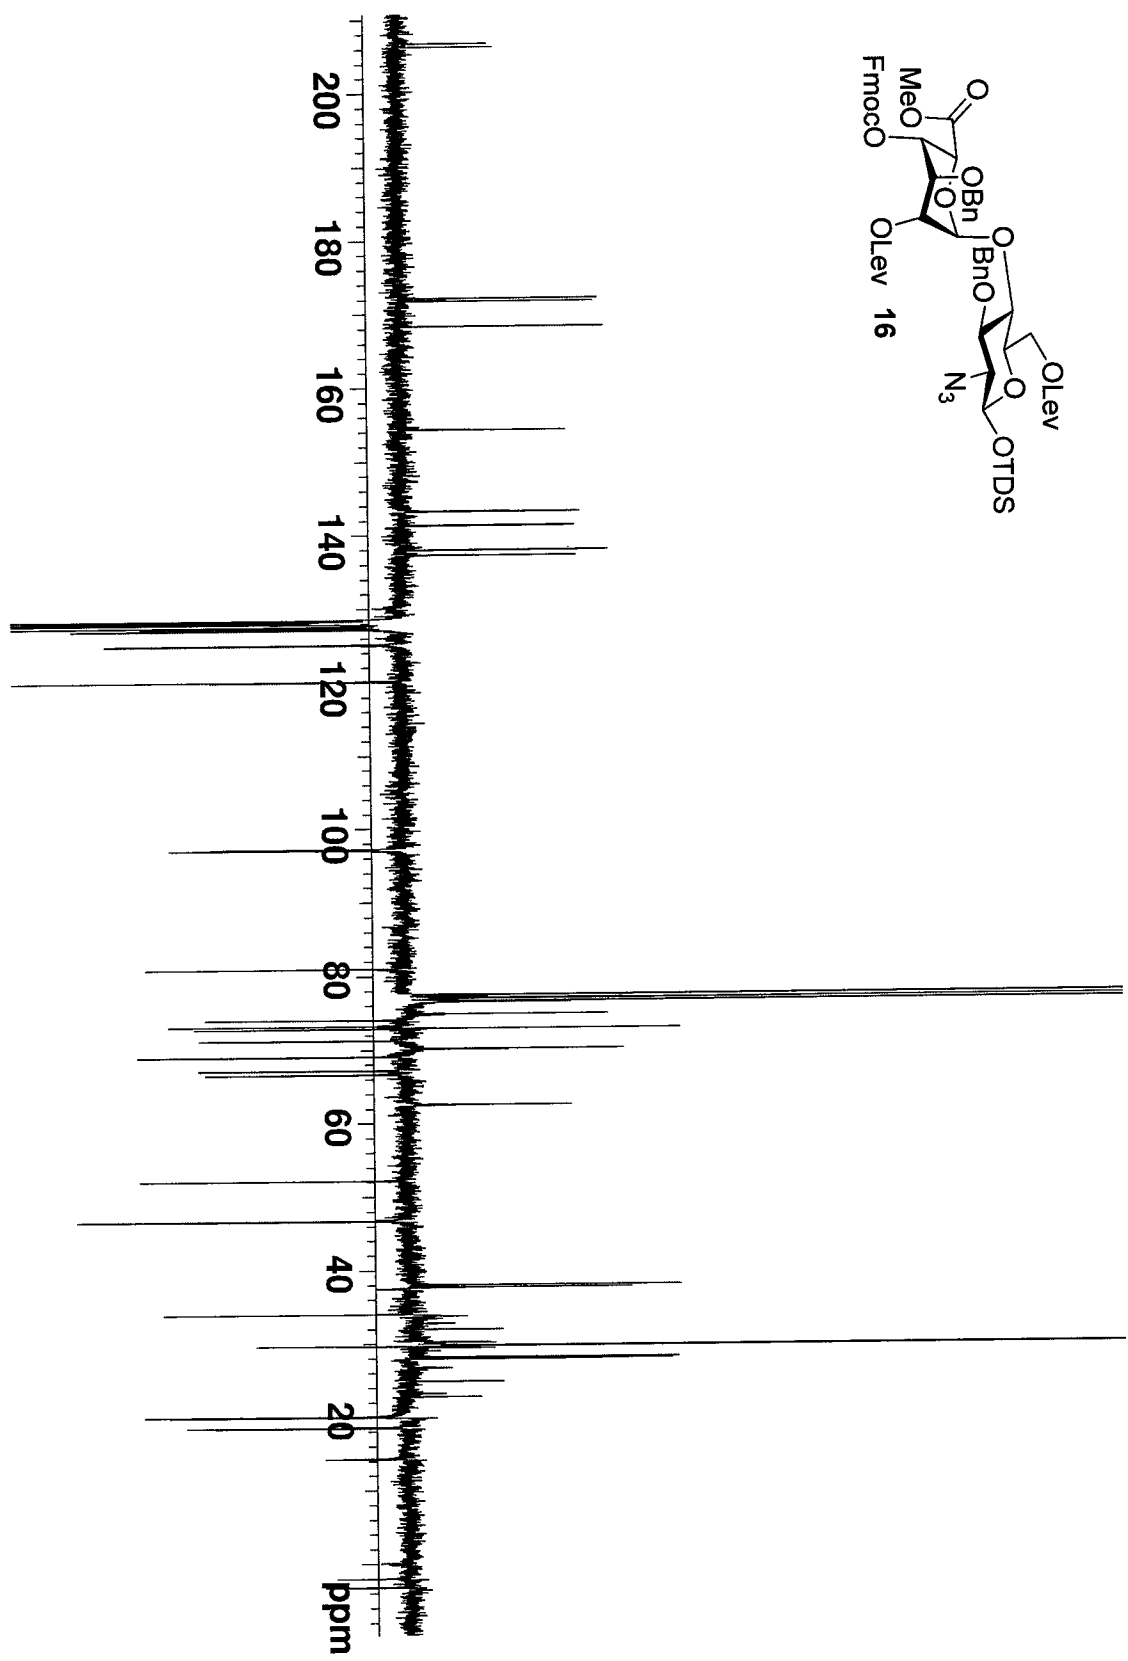



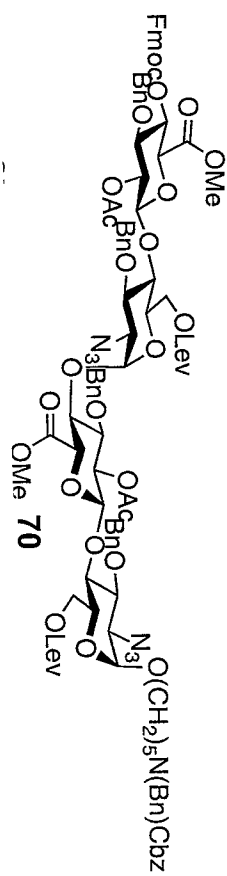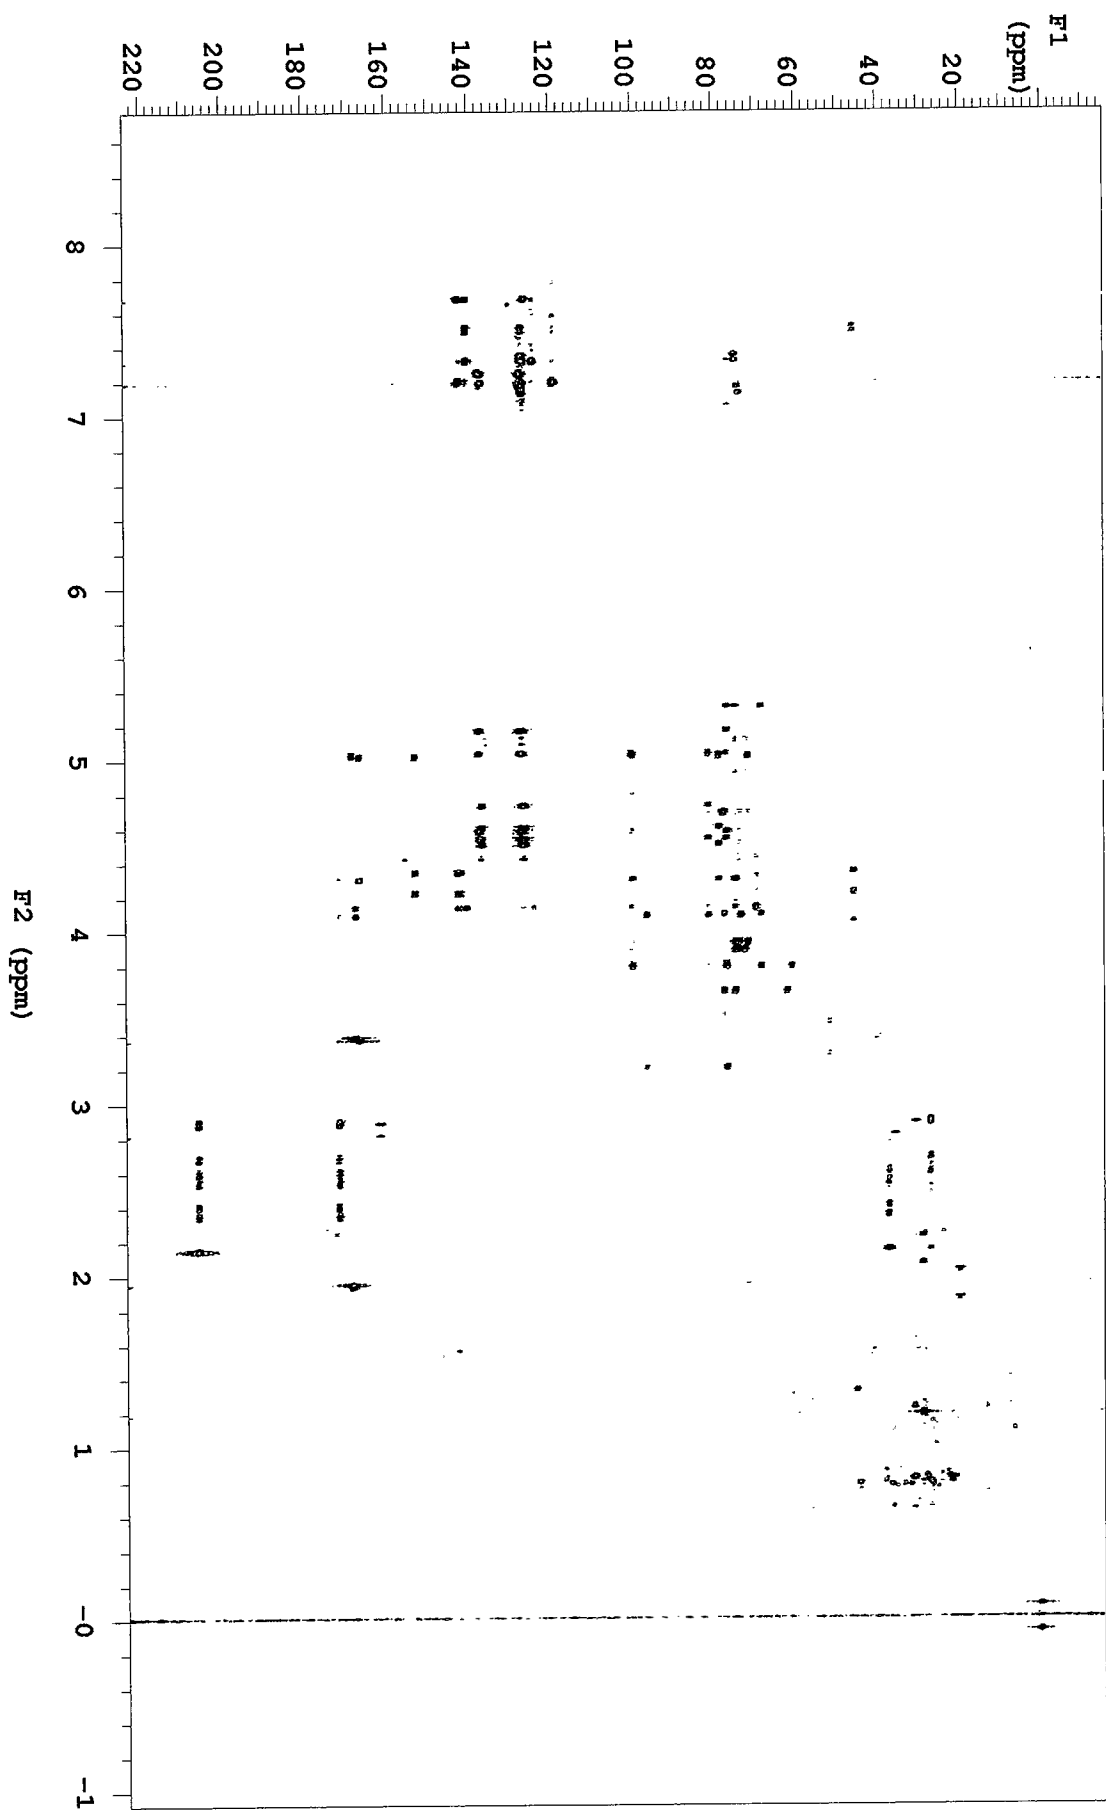

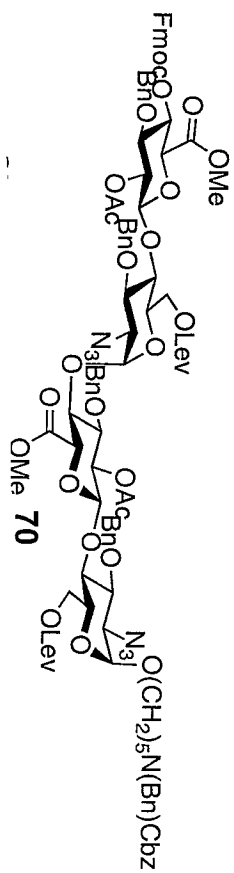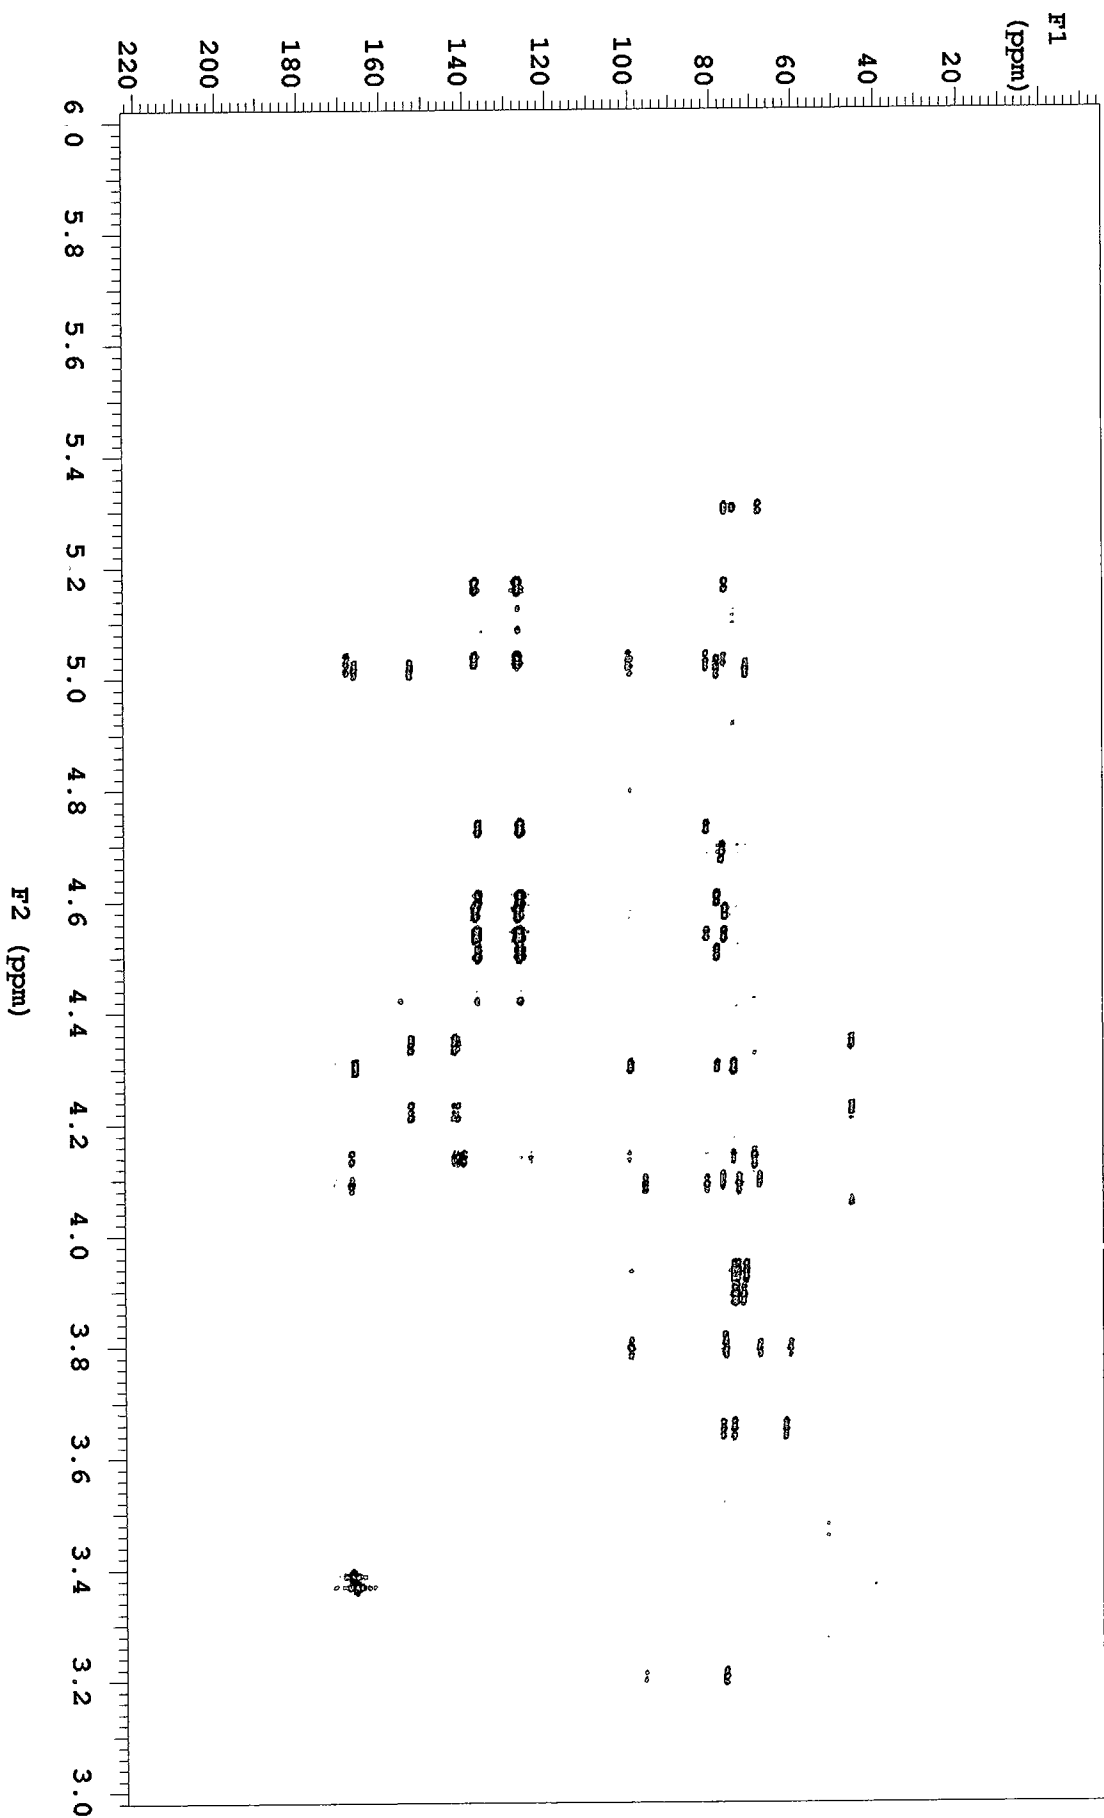

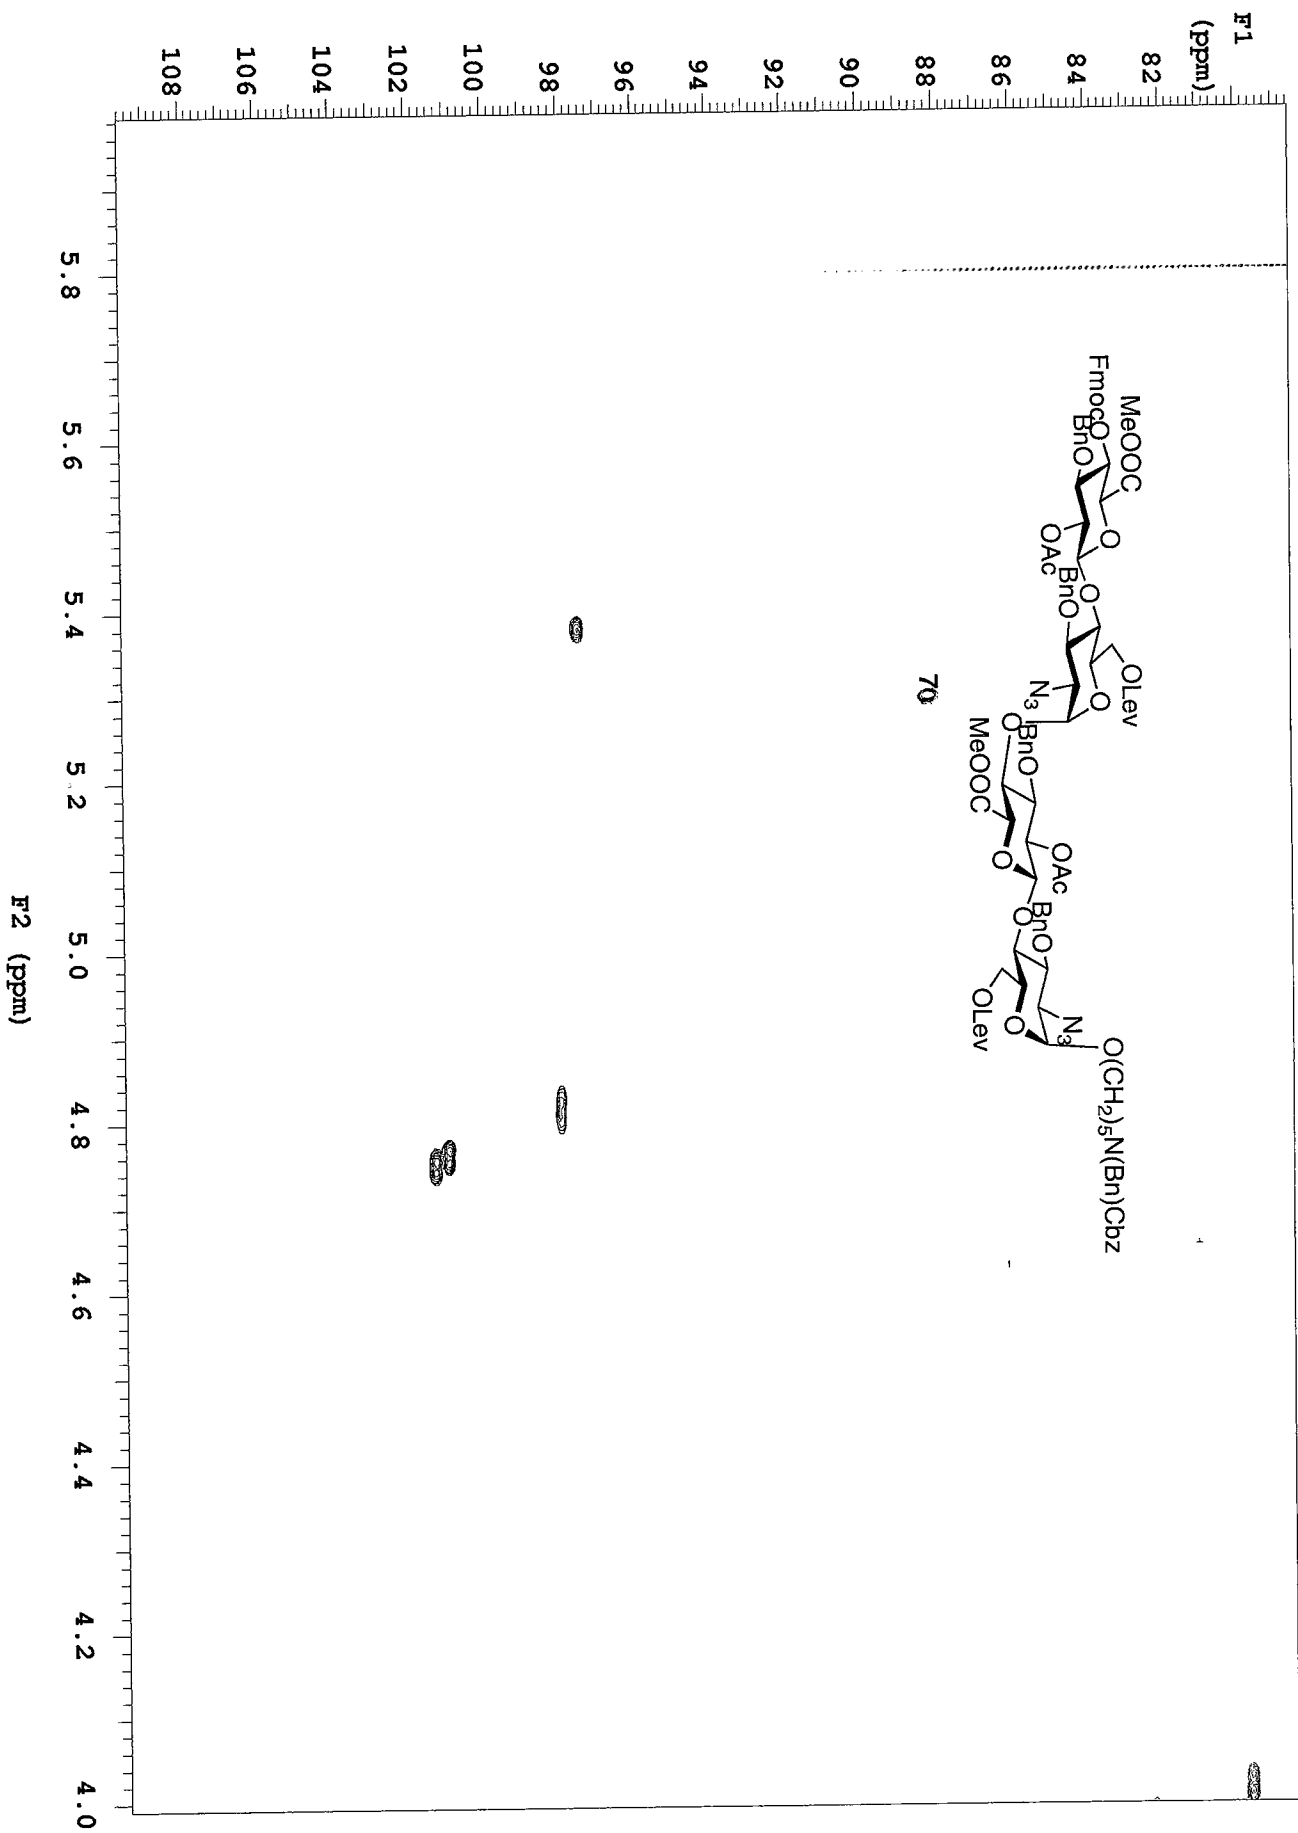

U112 111A11



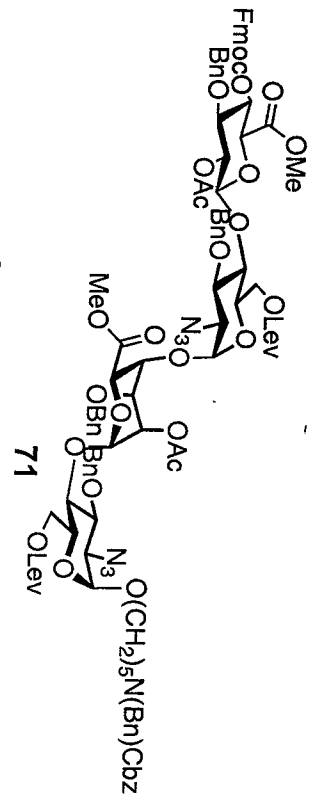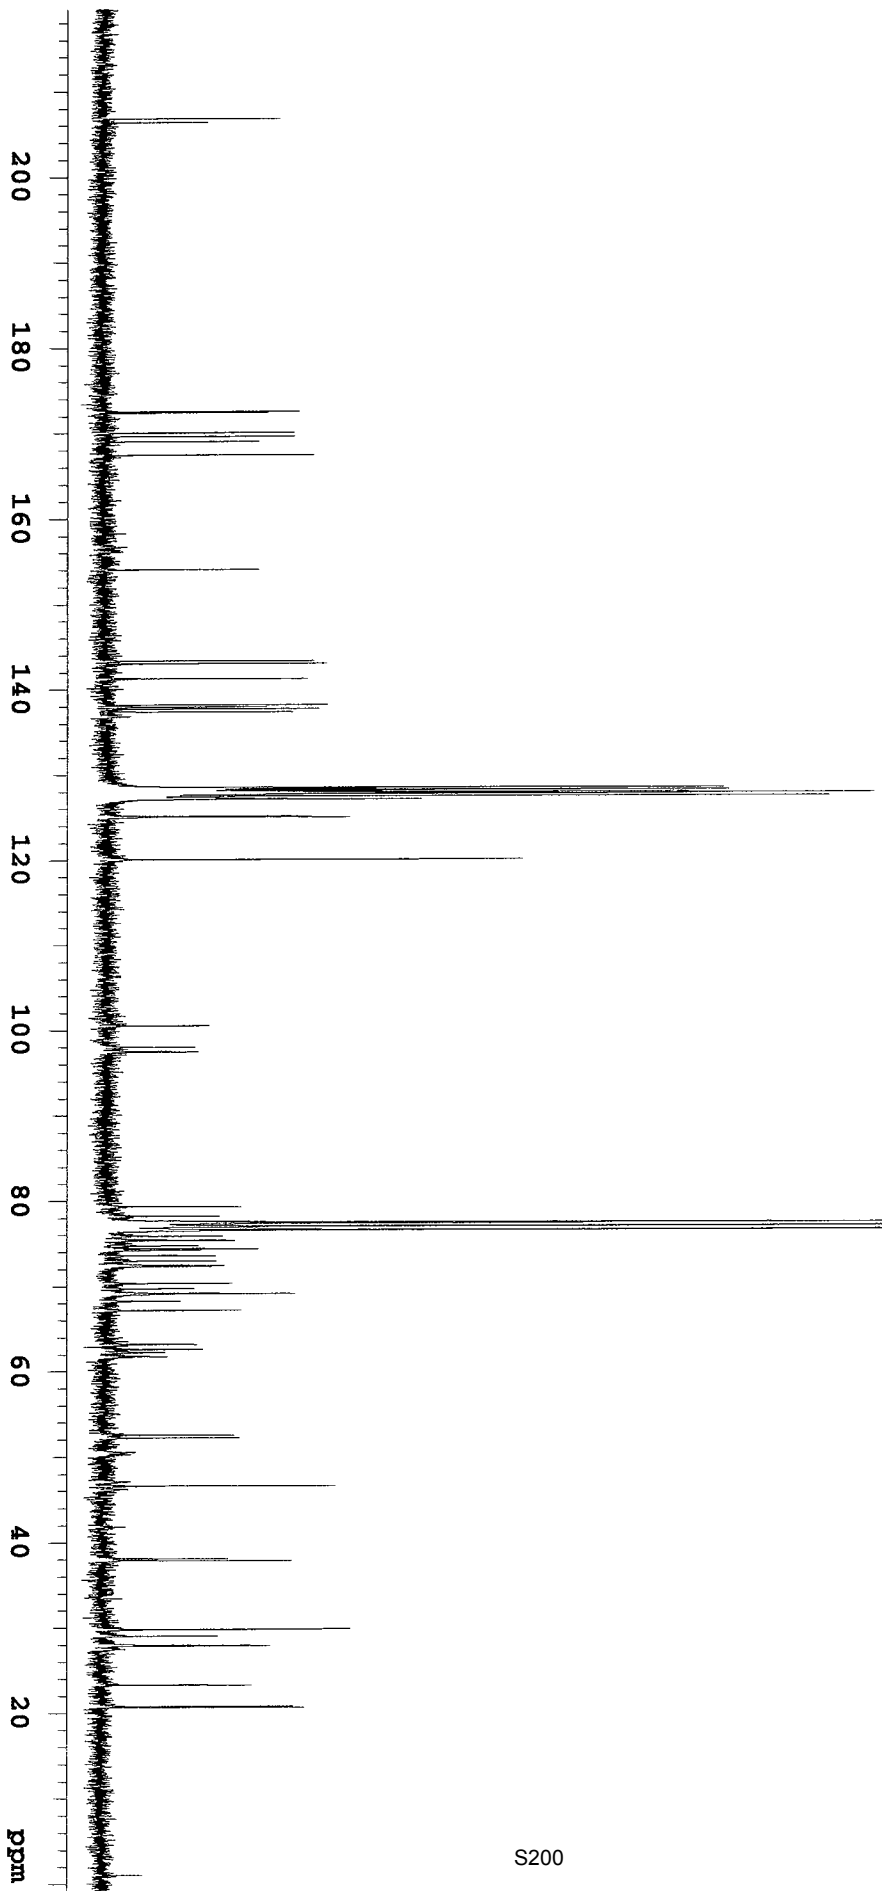





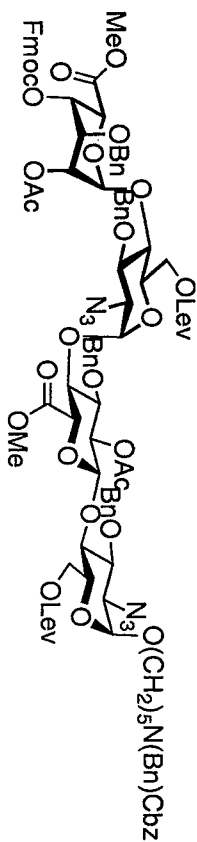

72

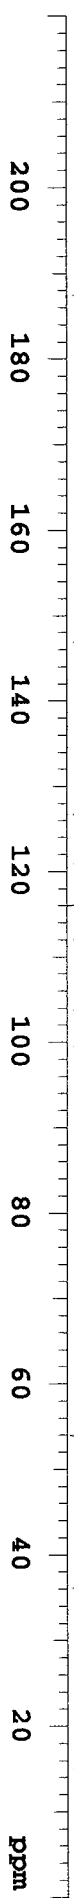

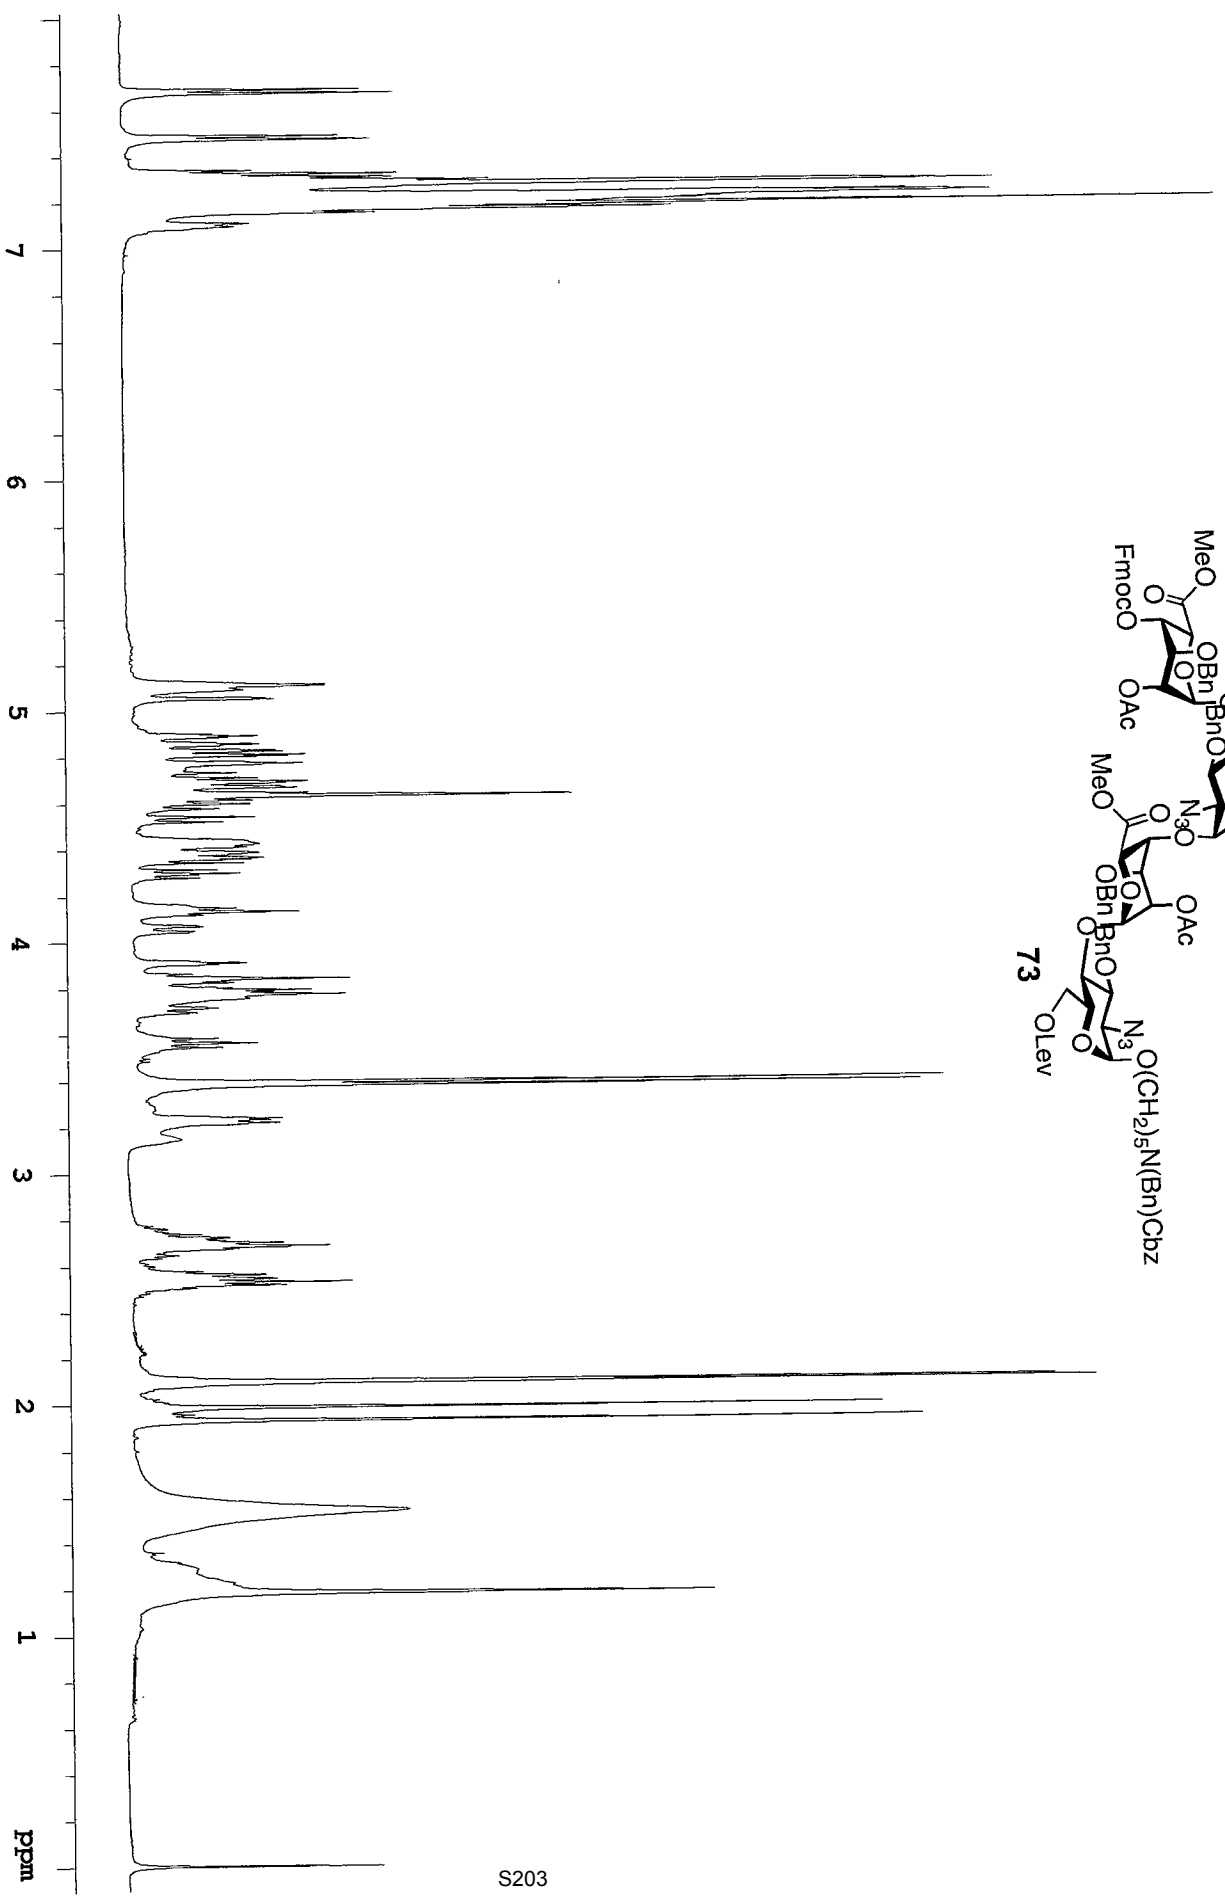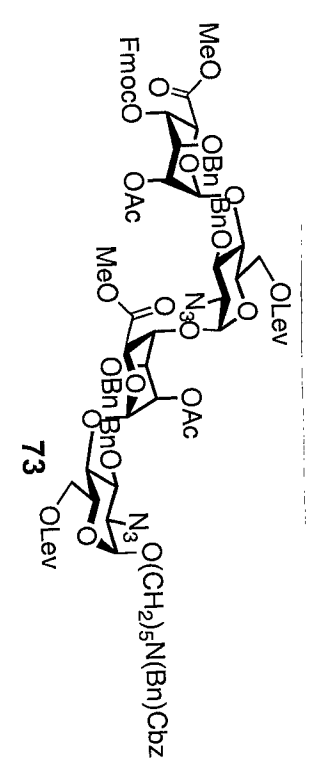

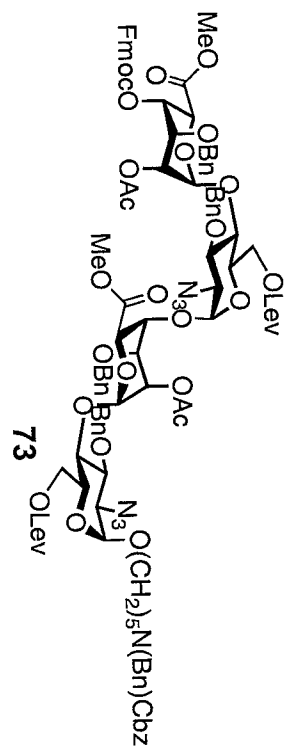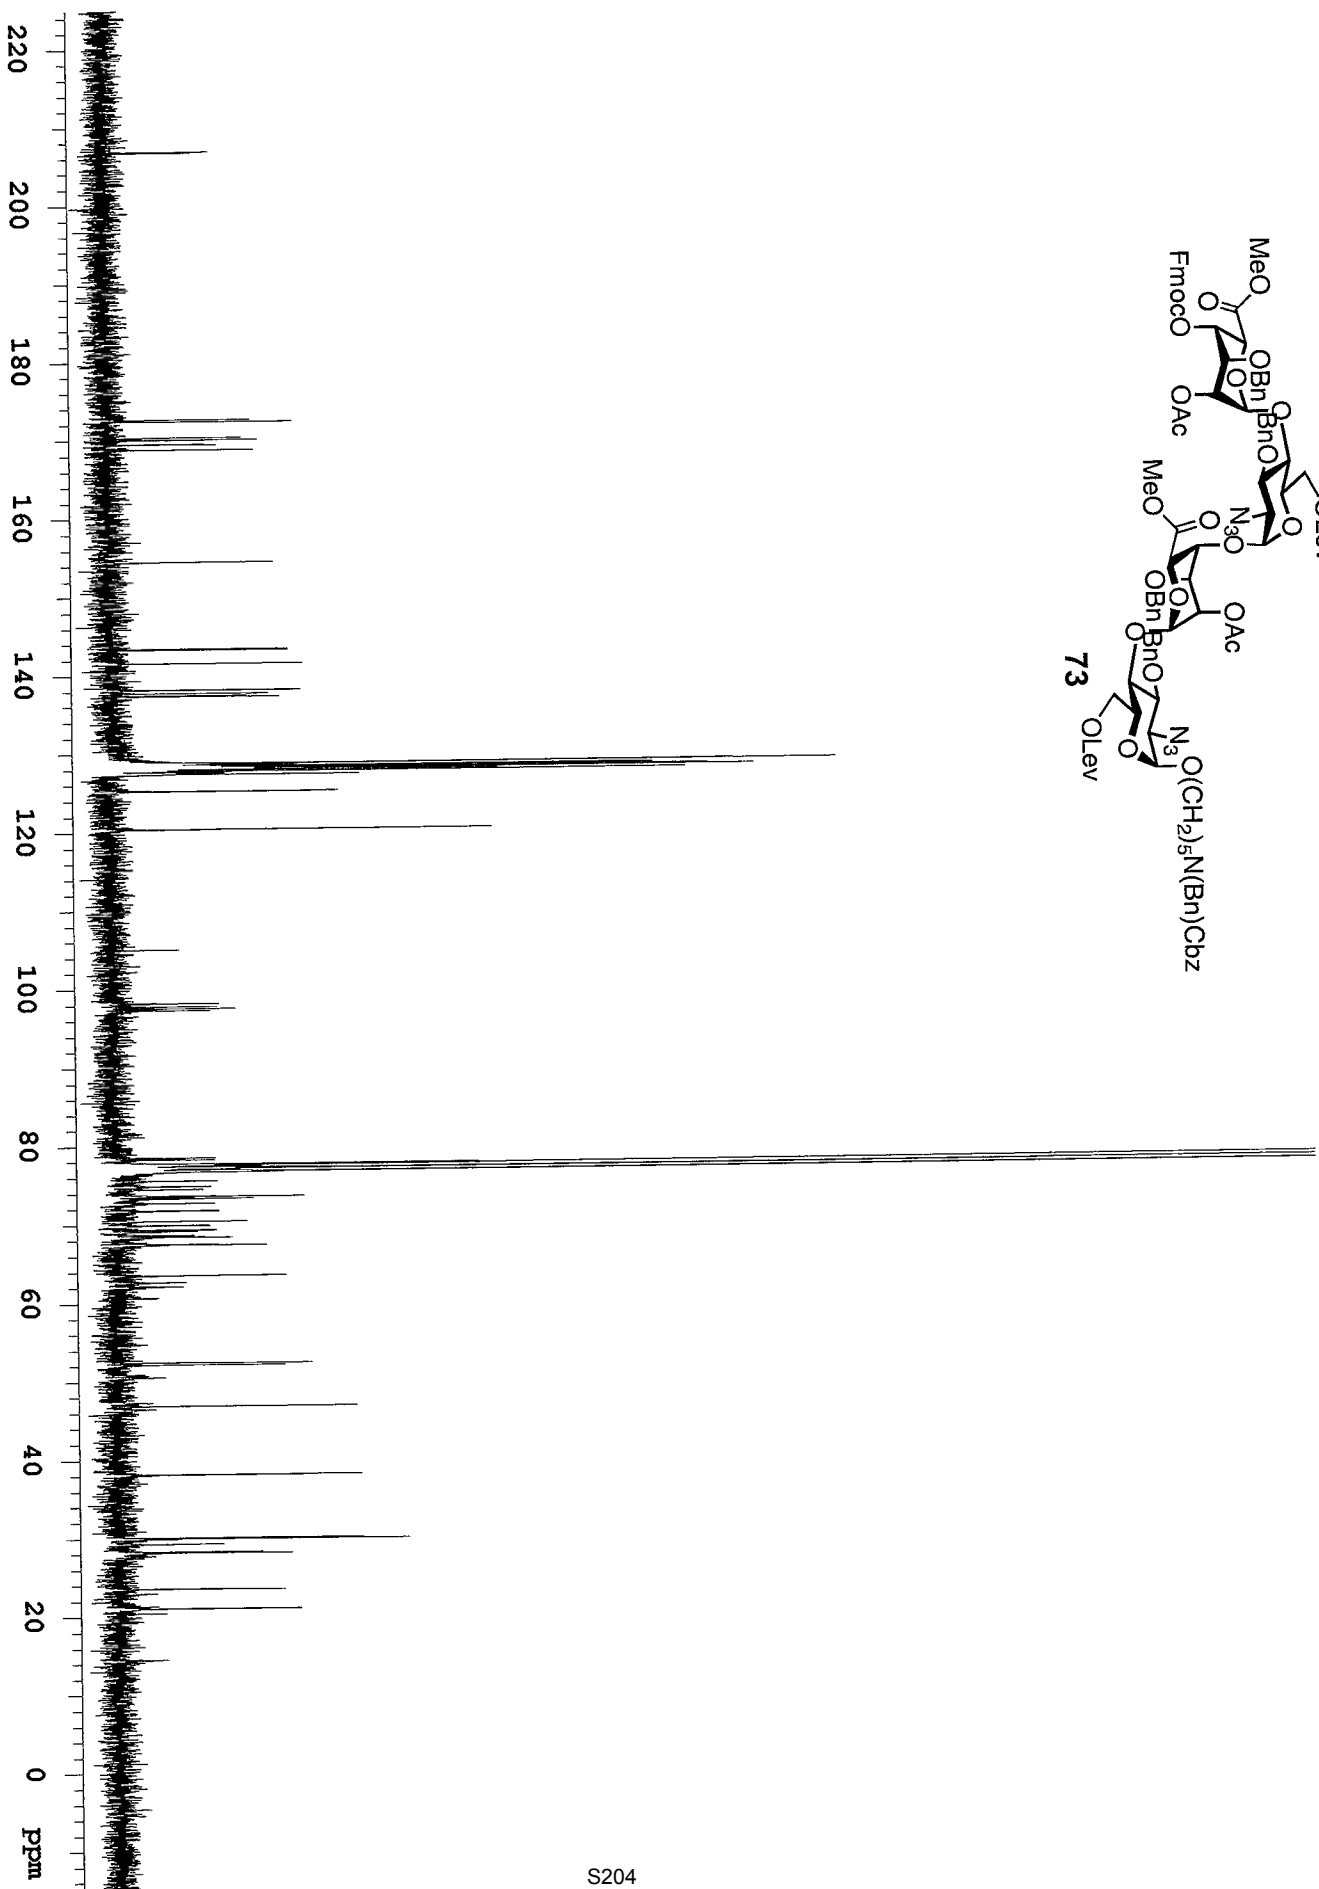

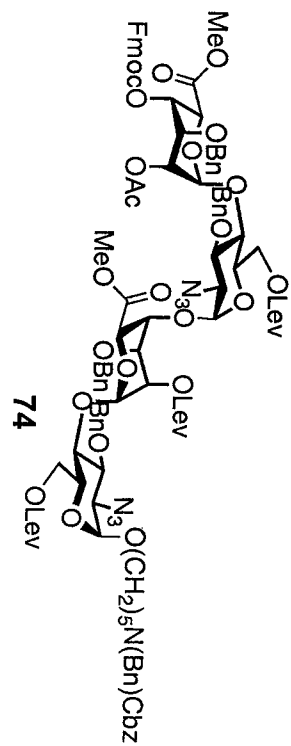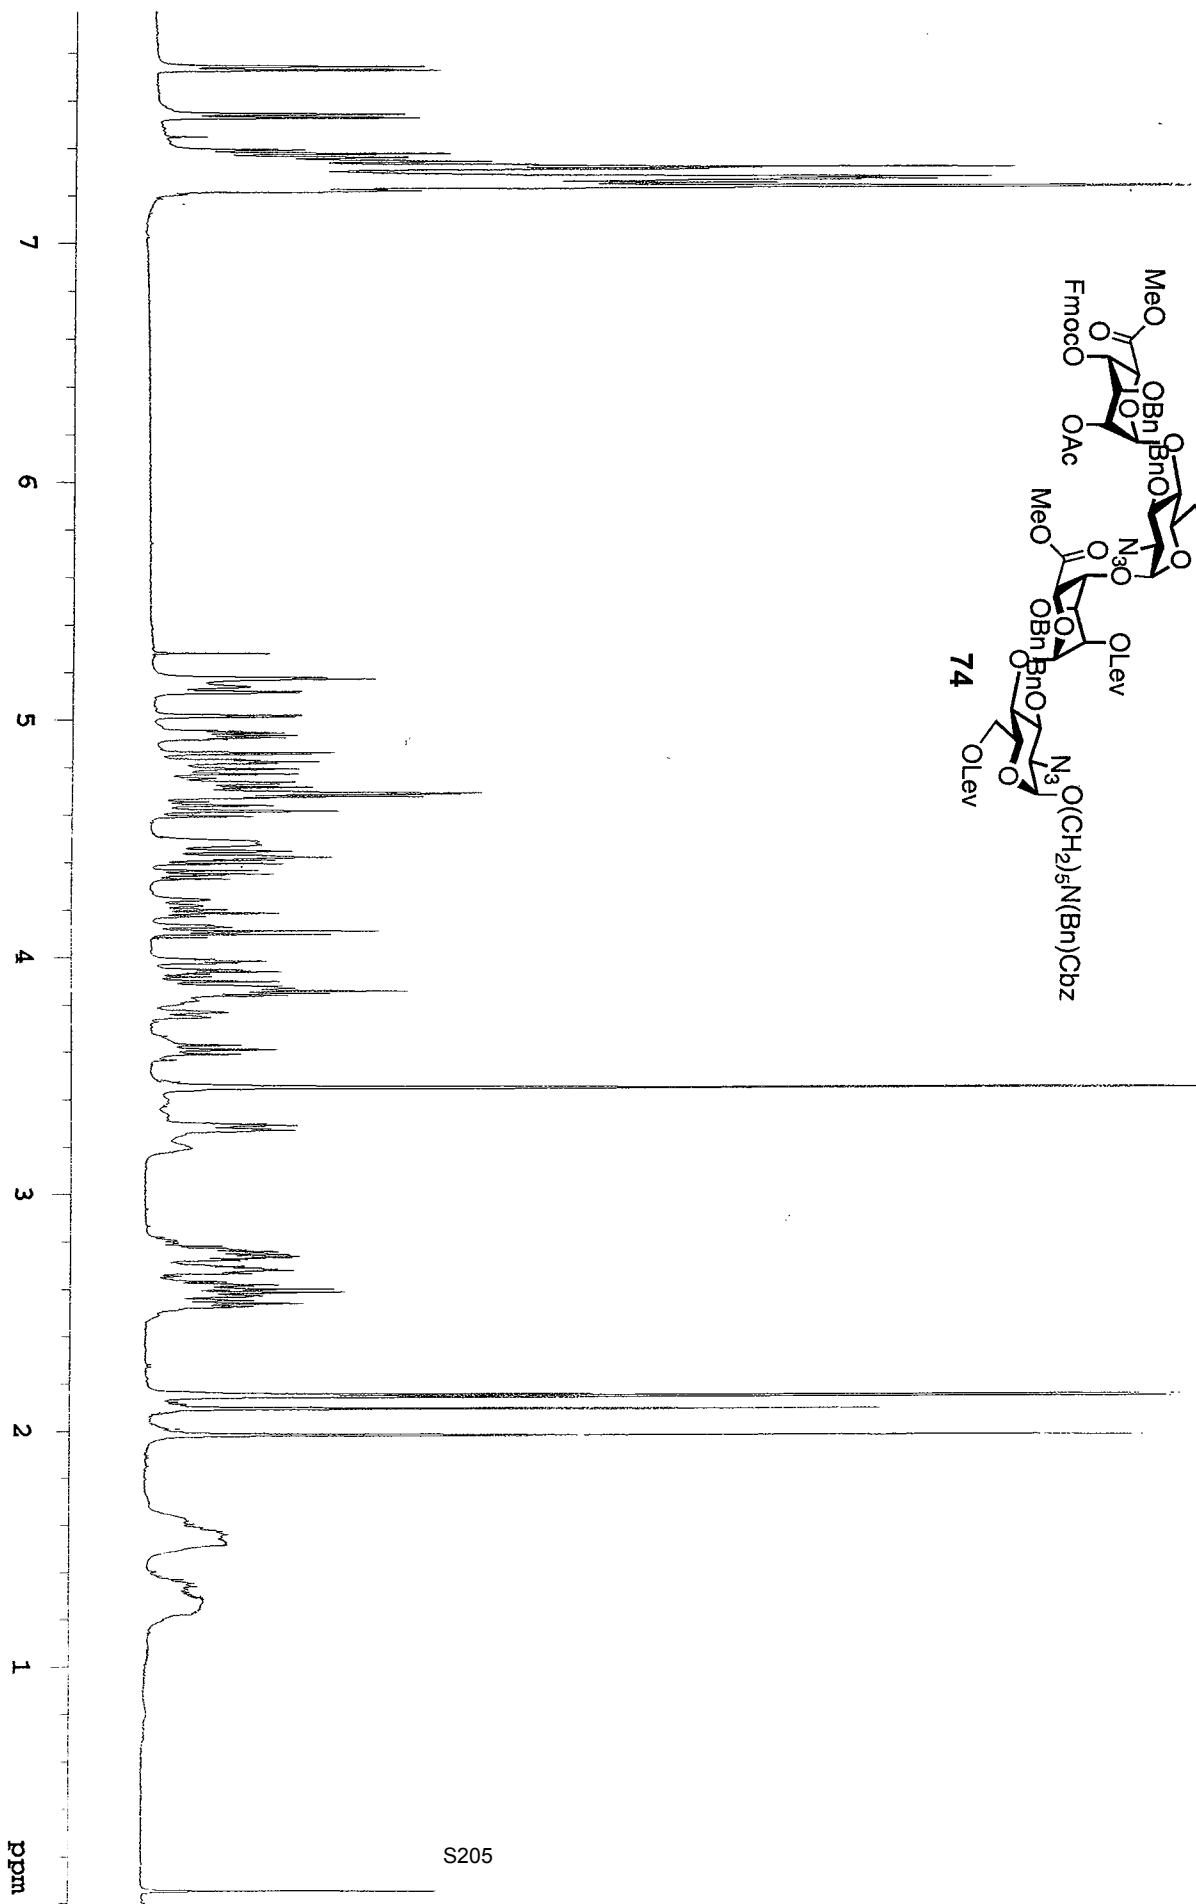



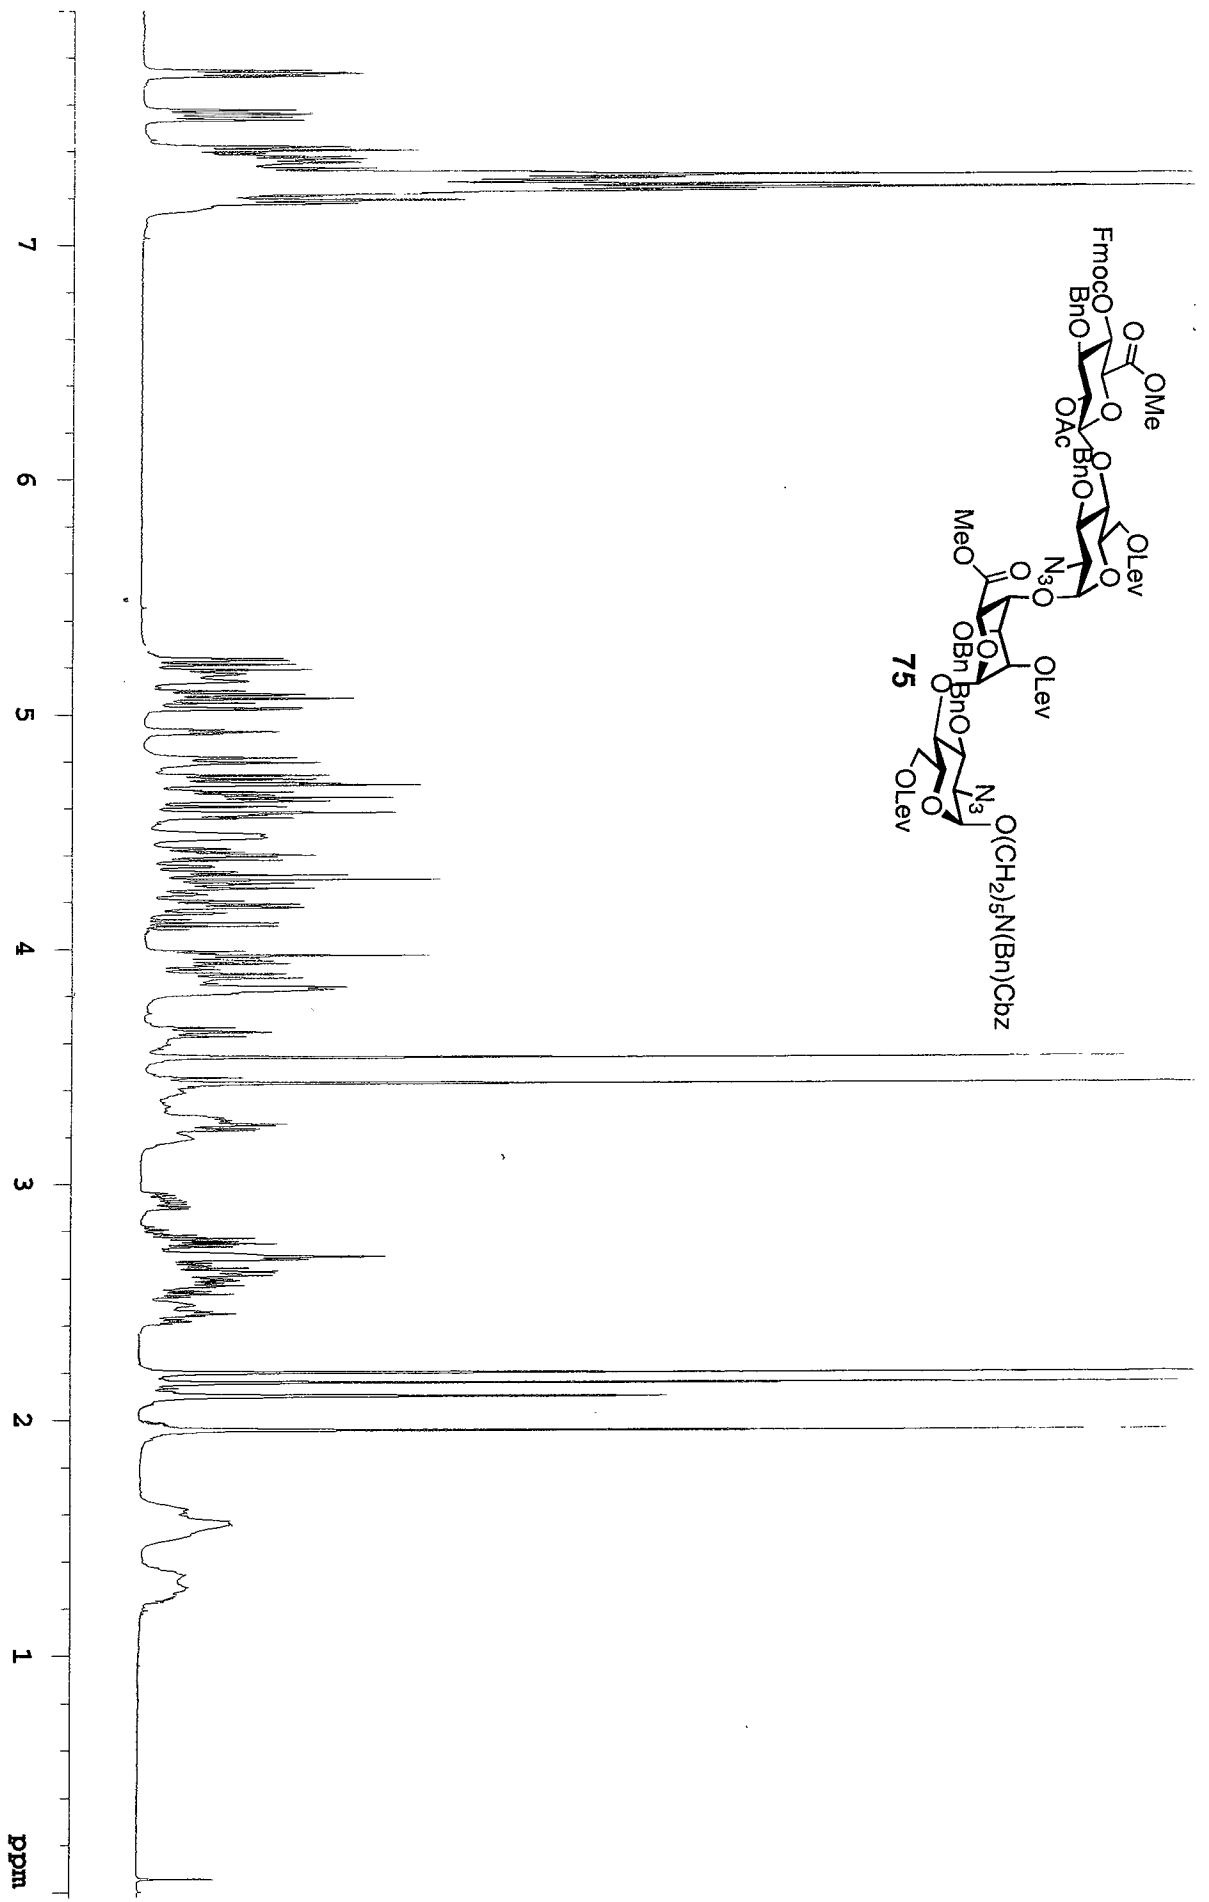

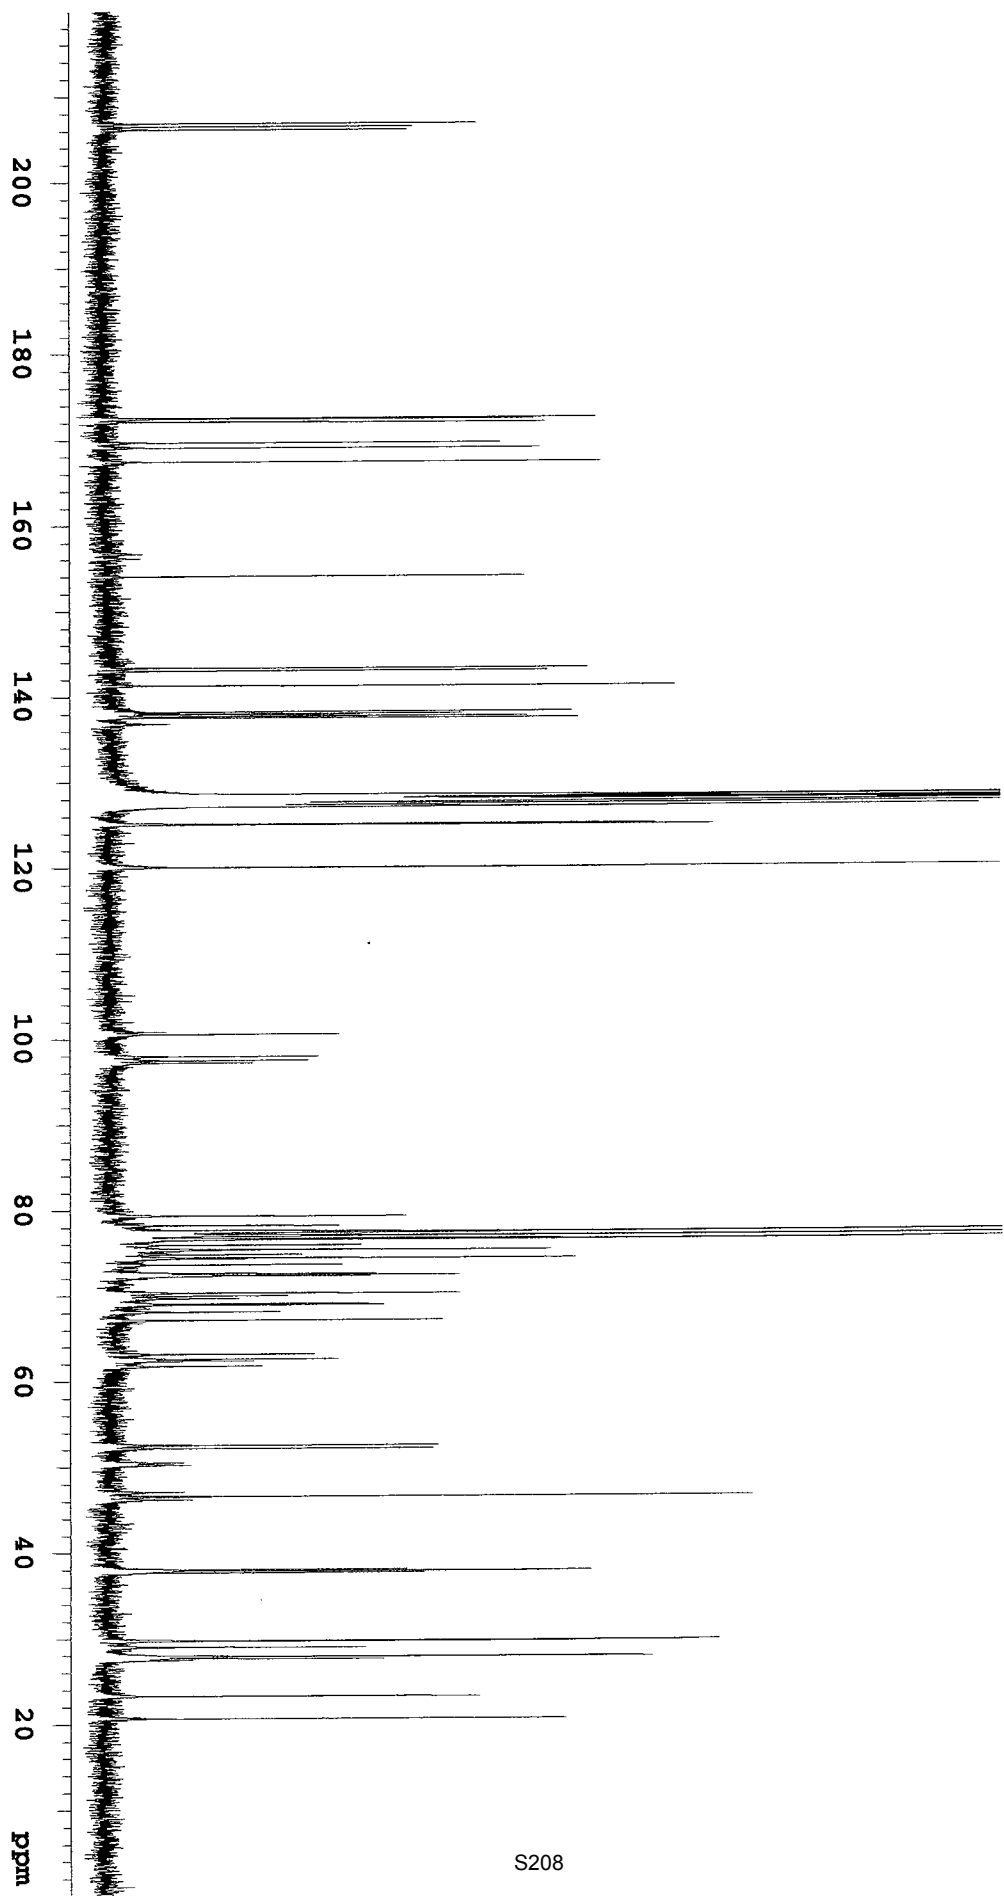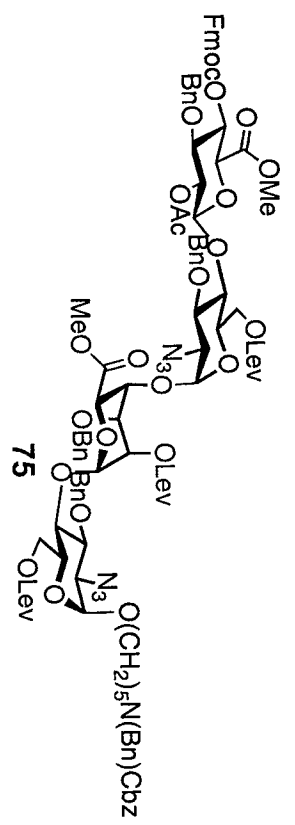



$\beta$ -D-GlcA(1-4)- $\alpha$ -D-GlcNAc(6S)(1-4)- $\beta$ -D-GlcA(1-4)- $\alpha$ -D-GlcNAc(6S)(1)-(CH<sub>2</sub>)<sub>5</sub>NH<sub>2</sub> (76)

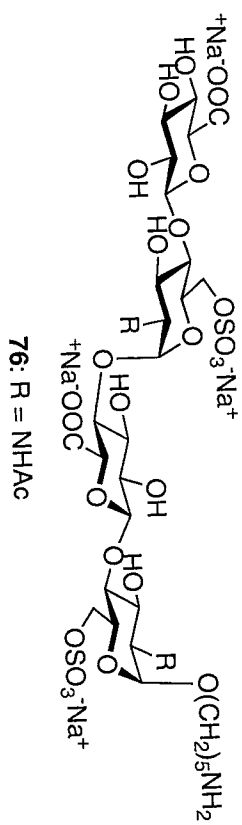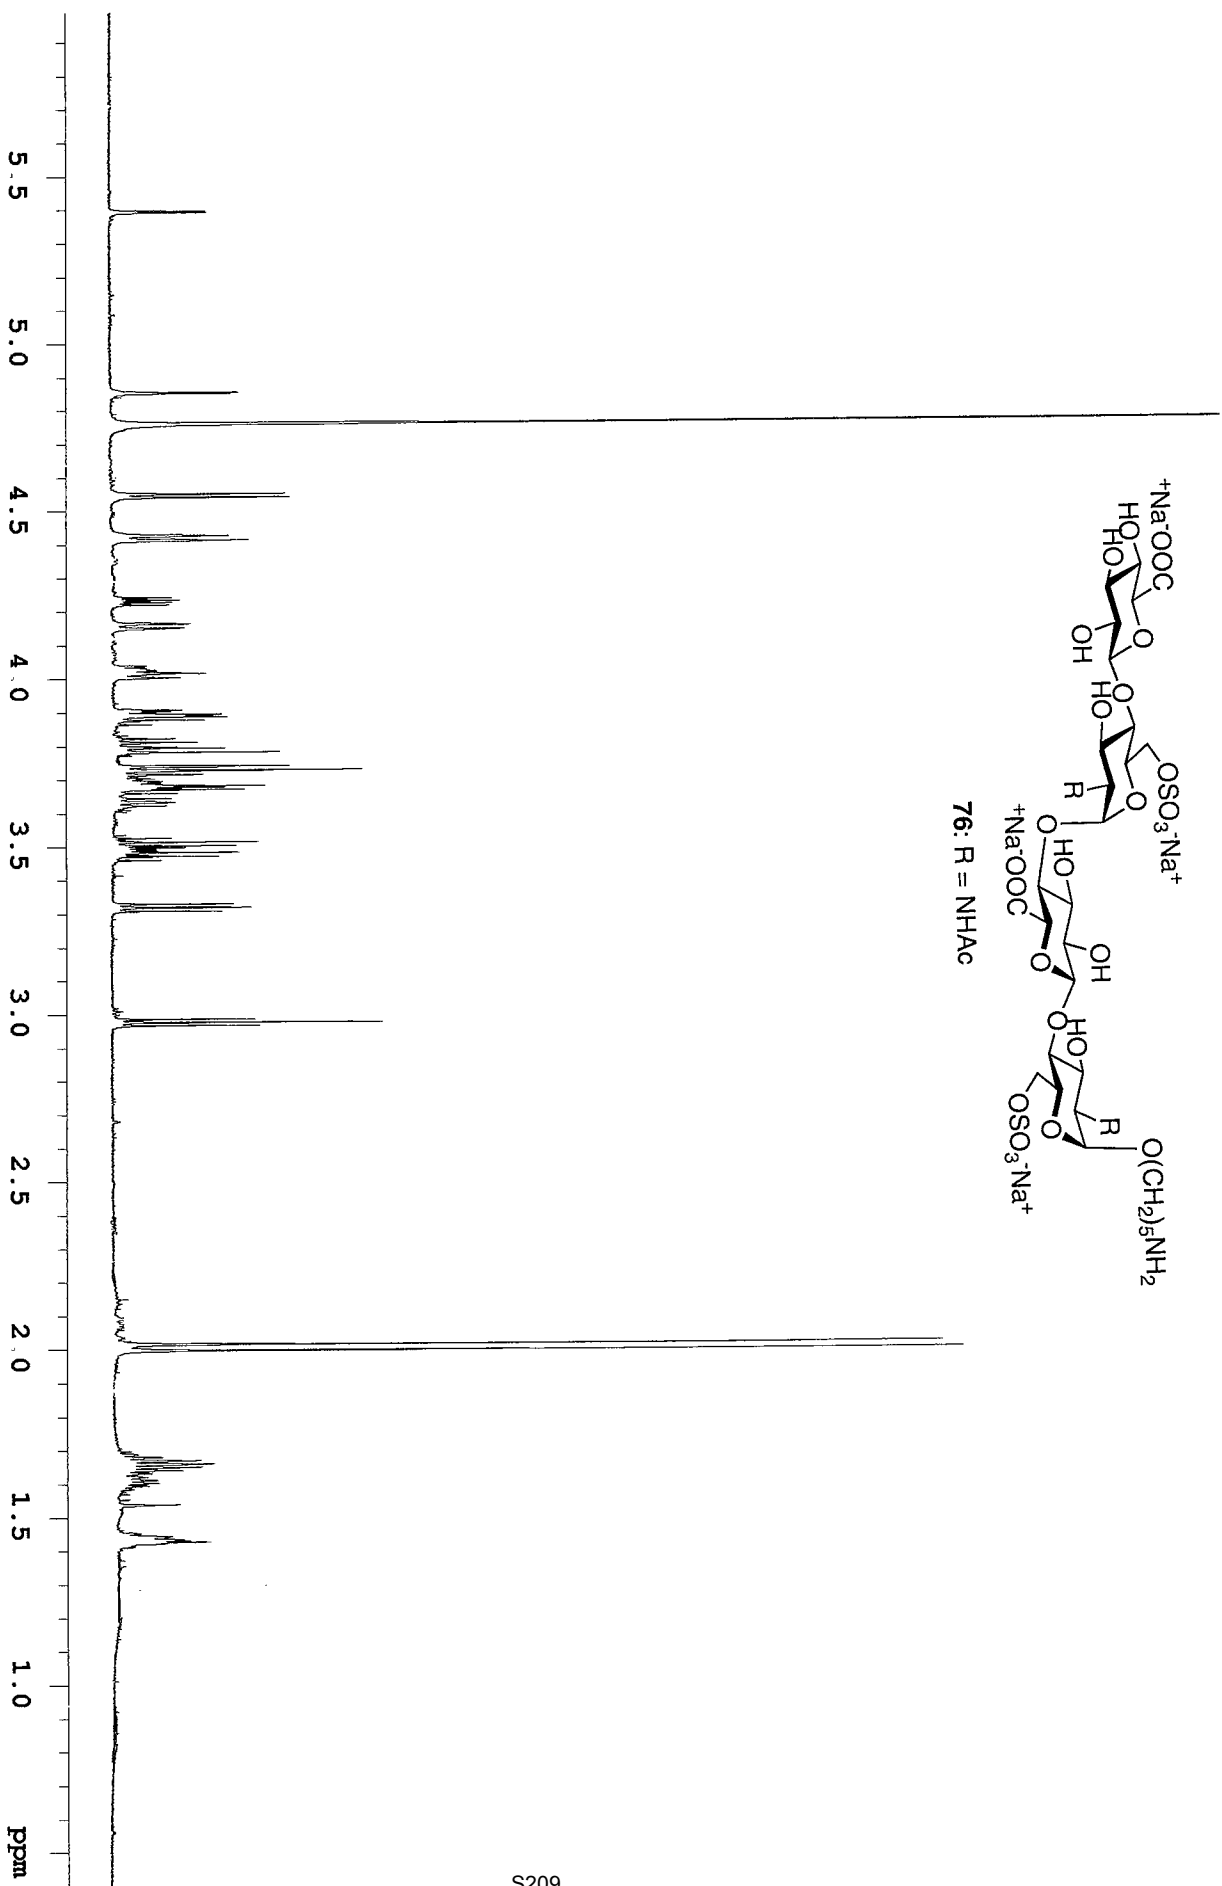

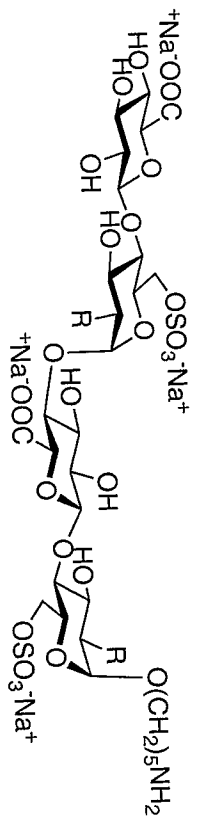

77: R =  $\text{NHSO}_3^- \text{Na}^+$

$\beta$ -D-GlcA(1-4)- $\alpha$ -D-GlcNS(6S)(1-4)- $\beta$ -D-GlcA(1-4)- $\alpha$ -D-GlcNS(6S)(1)-(CH<sub>2</sub>)<sub>5</sub>NH<sub>2</sub> (77)

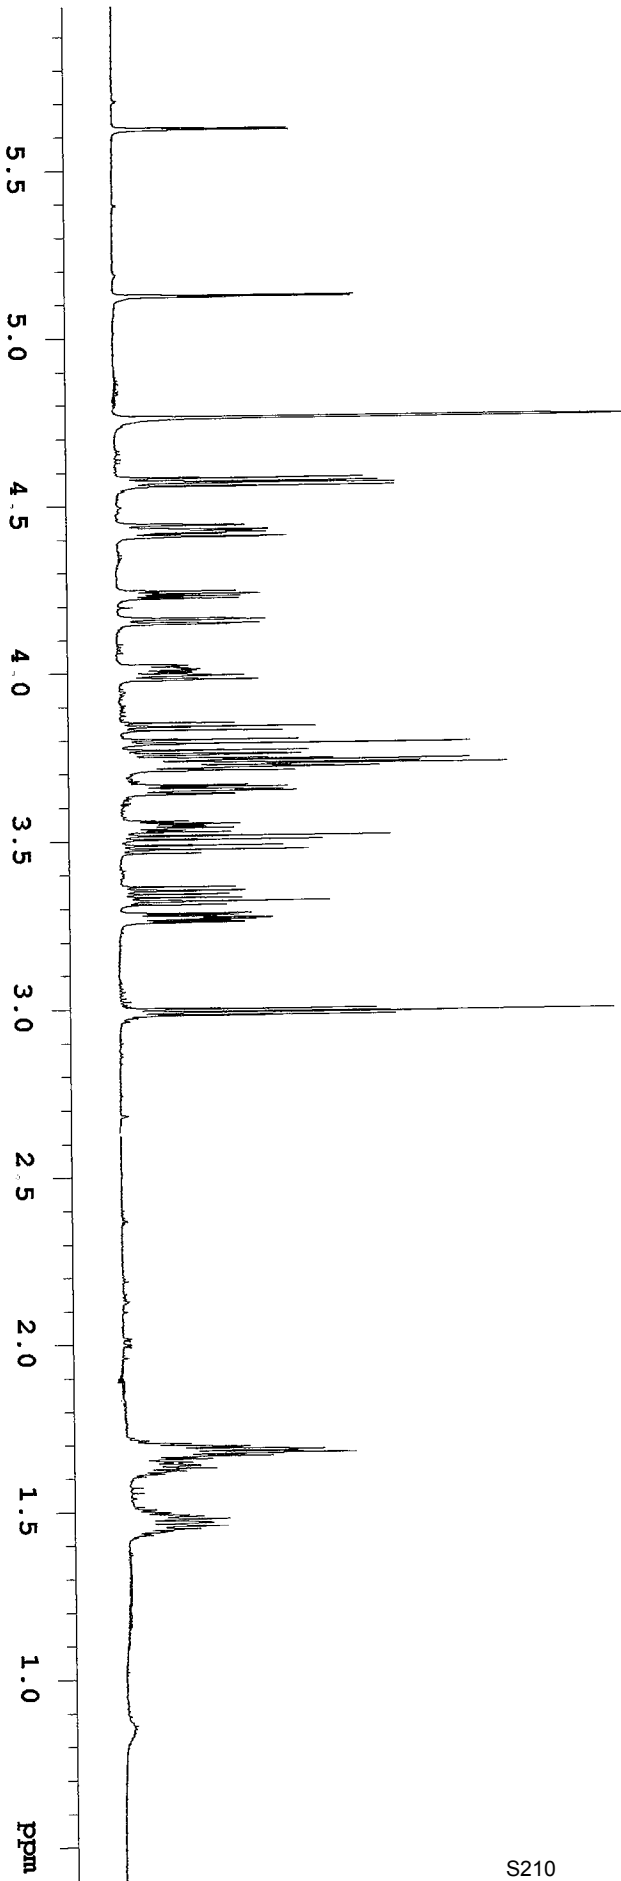

$\beta$ -D-GlcA(1-4)- $\alpha$ -D-GlcNAc(6S)(1-4)- $\alpha$ -L-IdoA(1-4)- $\alpha$ -D-GlcNAc(6S)(1)-(CH<sub>2</sub>)<sub>5</sub>NH<sub>2</sub> (78)

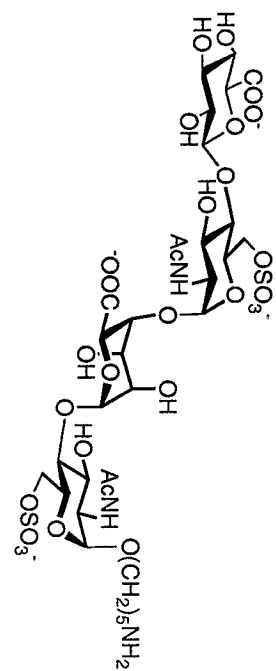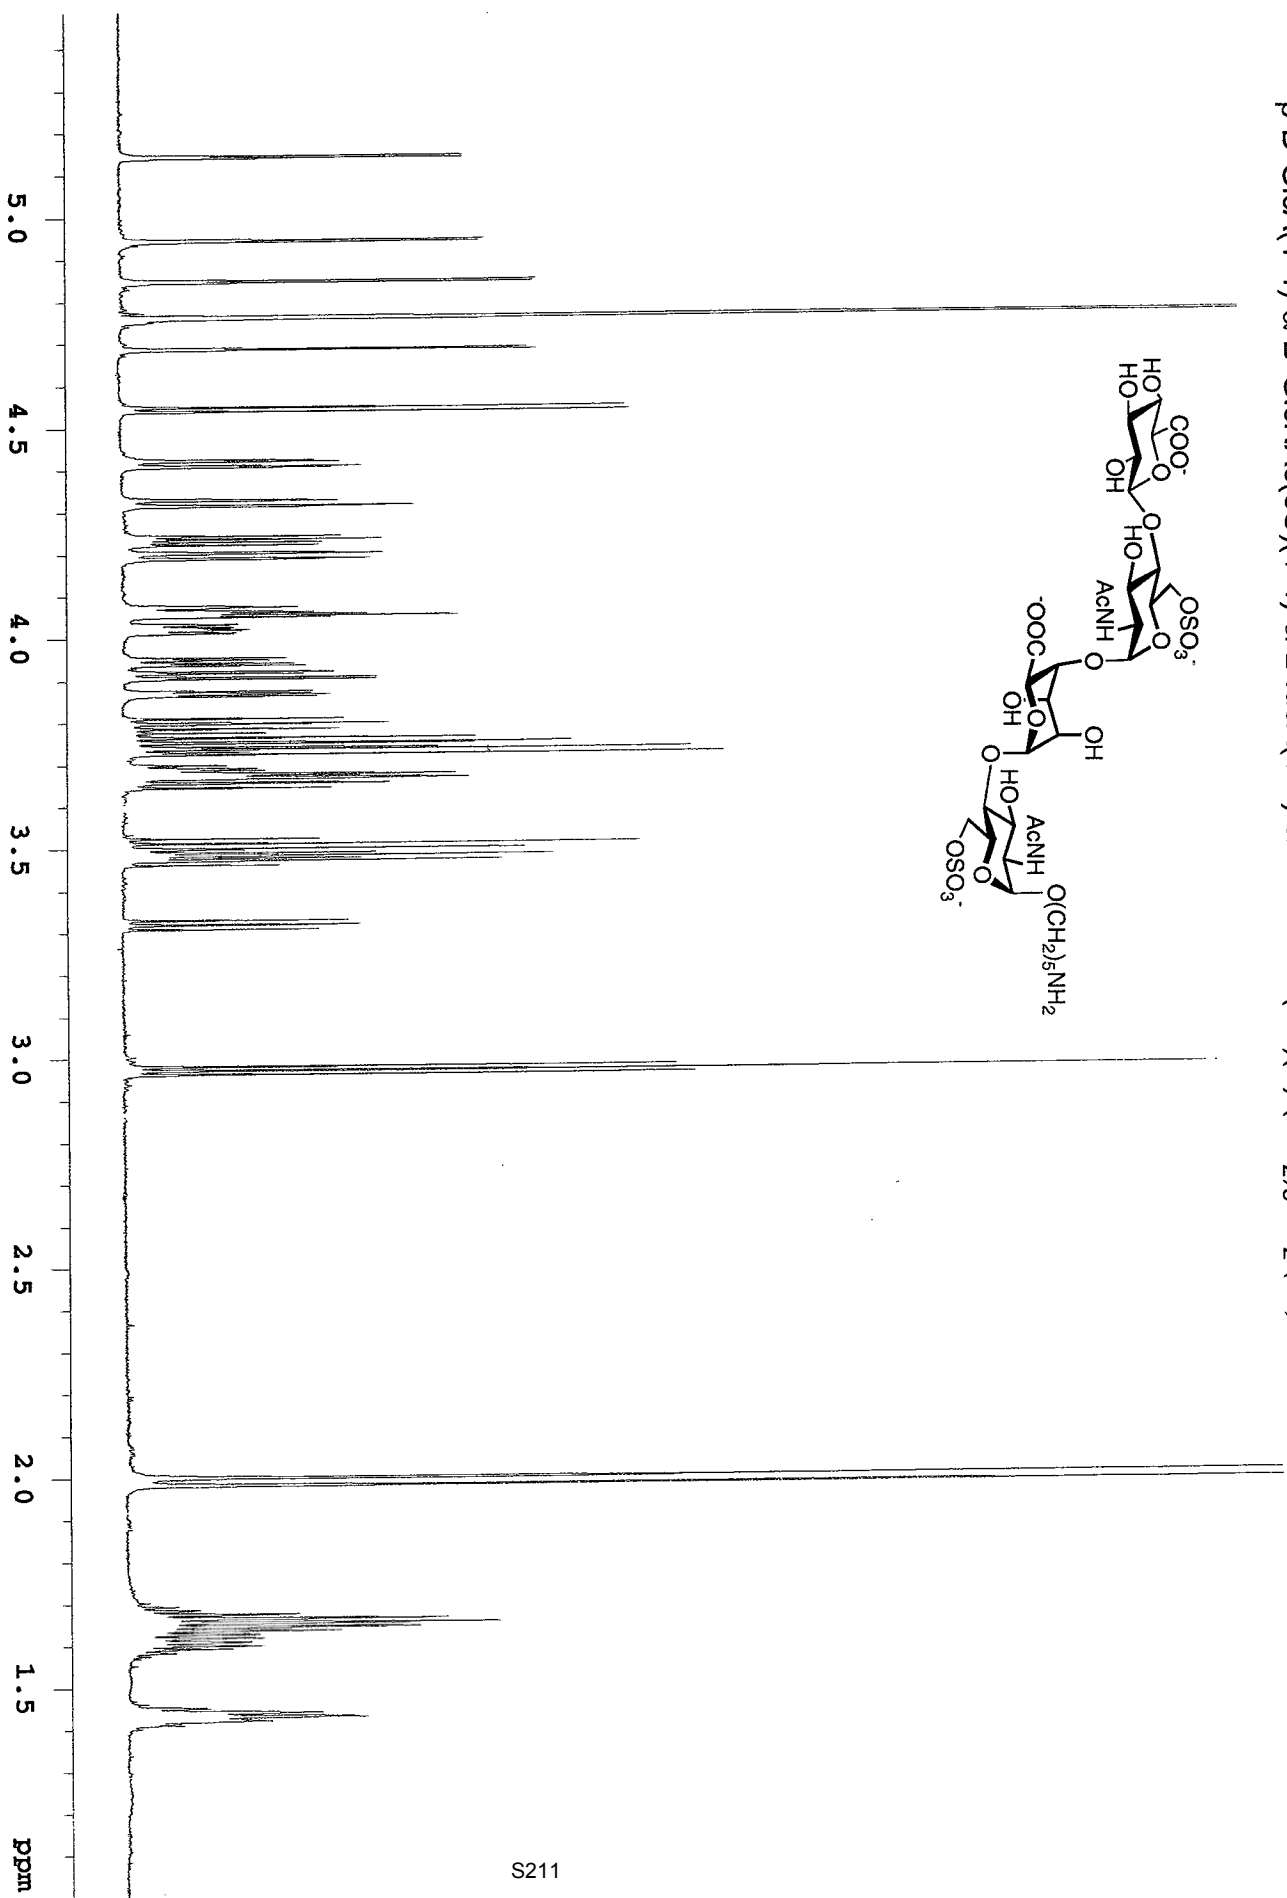

$\beta$ -D-GlcA(1-4)- $\alpha$ -D-GlcNS(6S)(1-4)- $\alpha$ -L-IdoA(1-4)- $\alpha$ -D-GlcNS(6S)(1)-(CH<sub>2</sub>)<sub>5</sub>NH<sub>2</sub> (79)

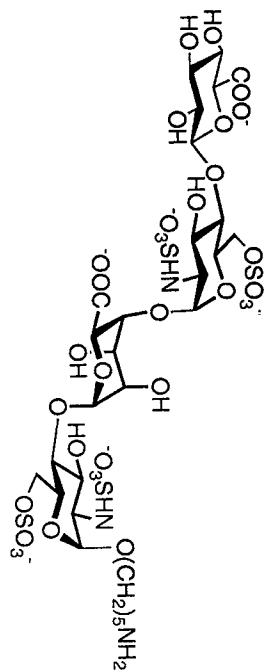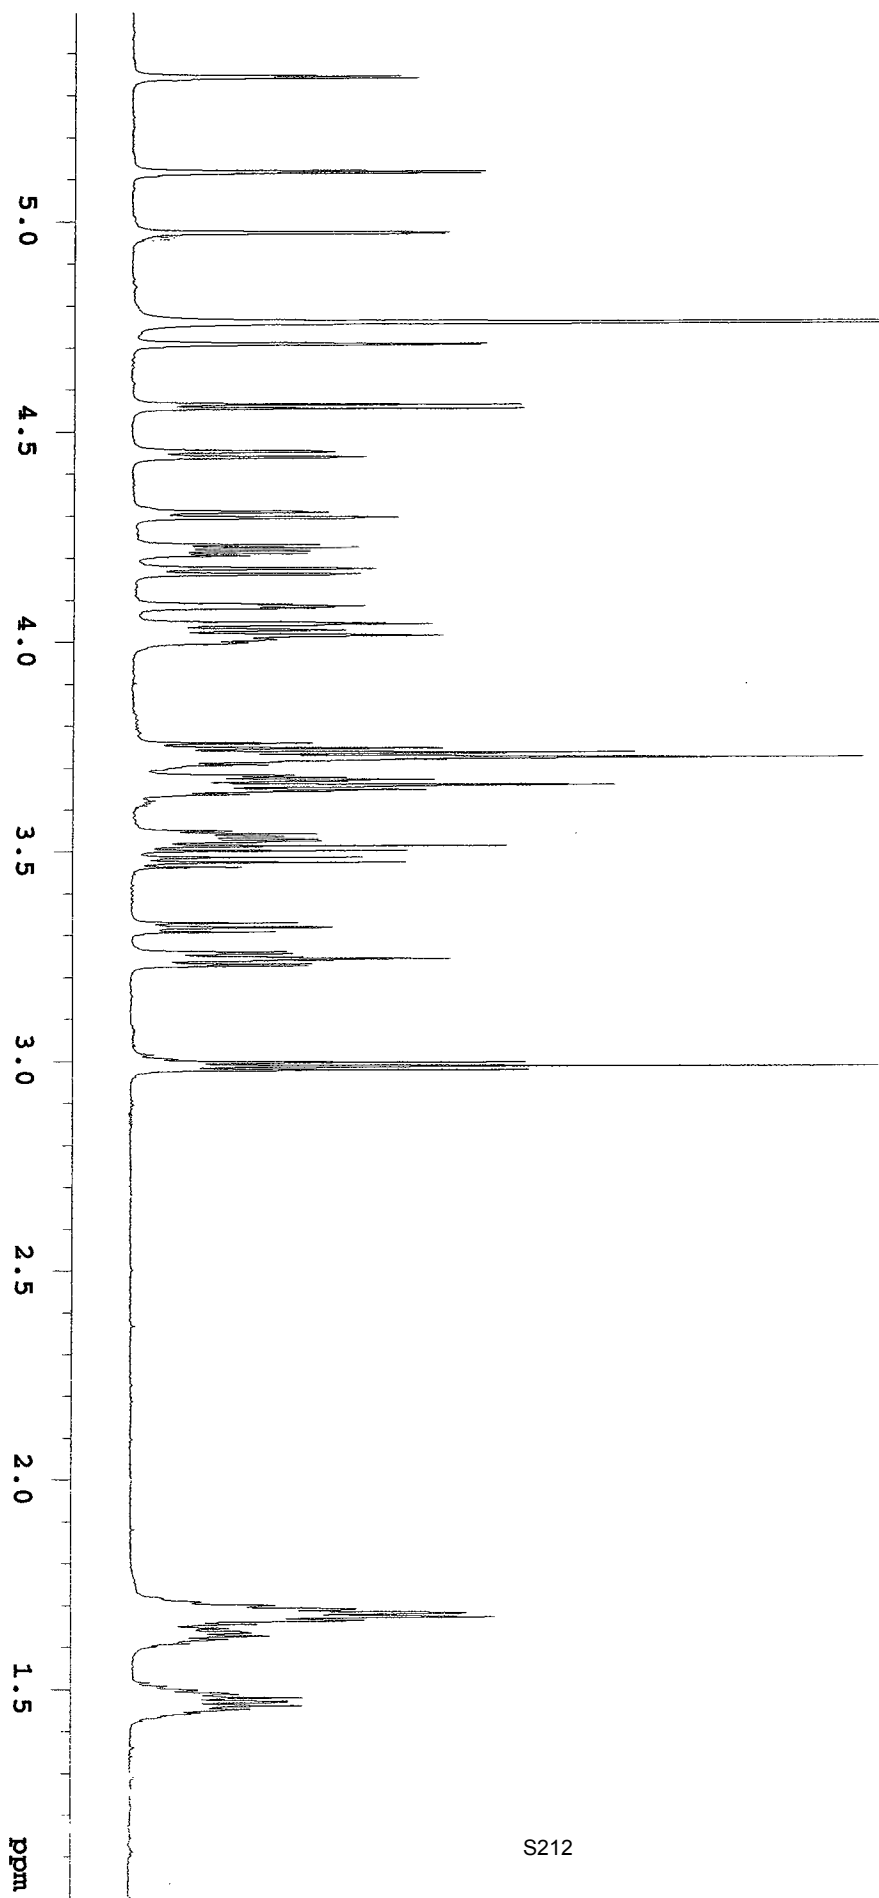

$\alpha$ -L-IdoA(1-4)- $\alpha$ -D-GlcNAc(6S)(1-4)- $\beta$ -D-GlcA(1-4)- $\alpha$ -D-GlcNAc(6S)(1)-(CH<sub>2</sub>)<sub>5</sub>NH<sub>2</sub> (80)

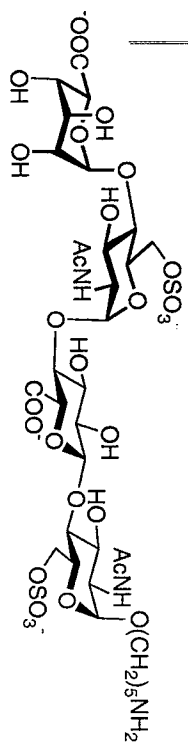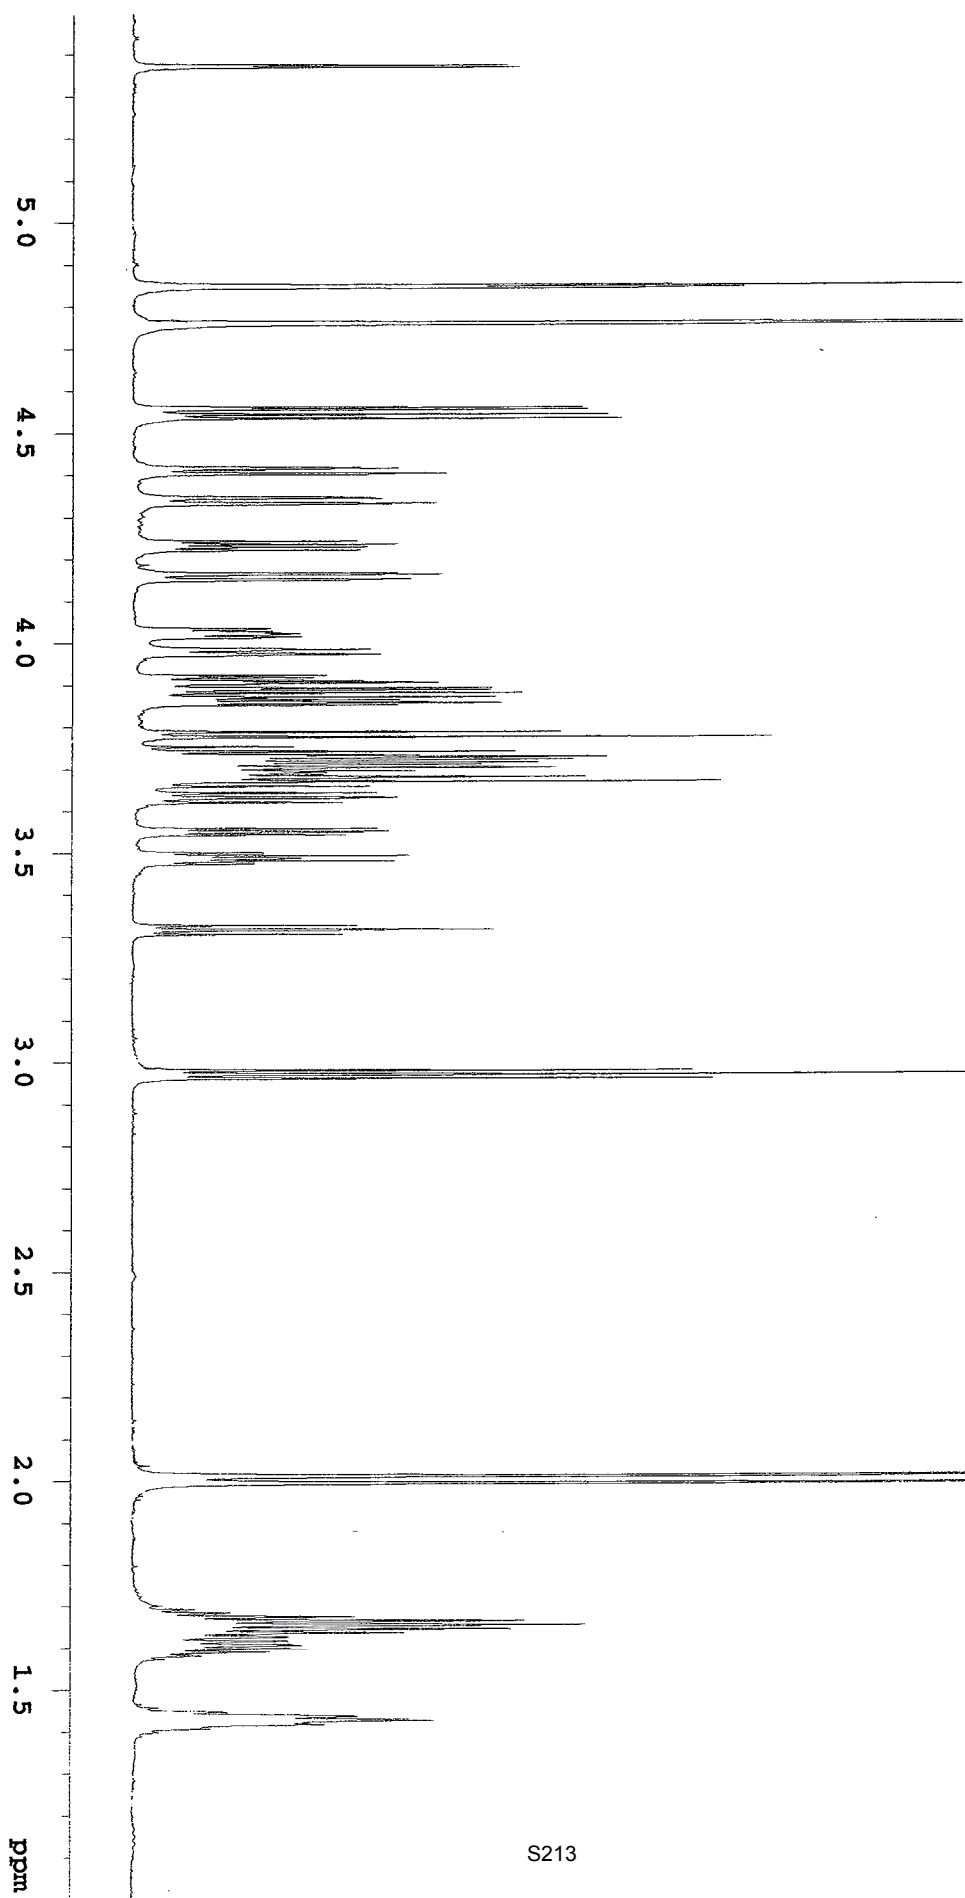

$\alpha$ -L-IdoA(1-4)- $\alpha$ -D-GlcNS(6S)(1-4)- $\beta$ -D-GlcA(1-4)- $\alpha$ -D-GlcNS(6S)(1)-(CH<sub>2</sub>)<sub>5</sub>NH<sub>2</sub> (81)

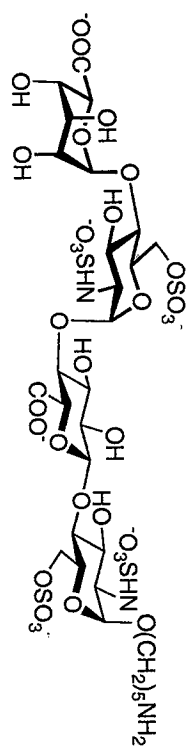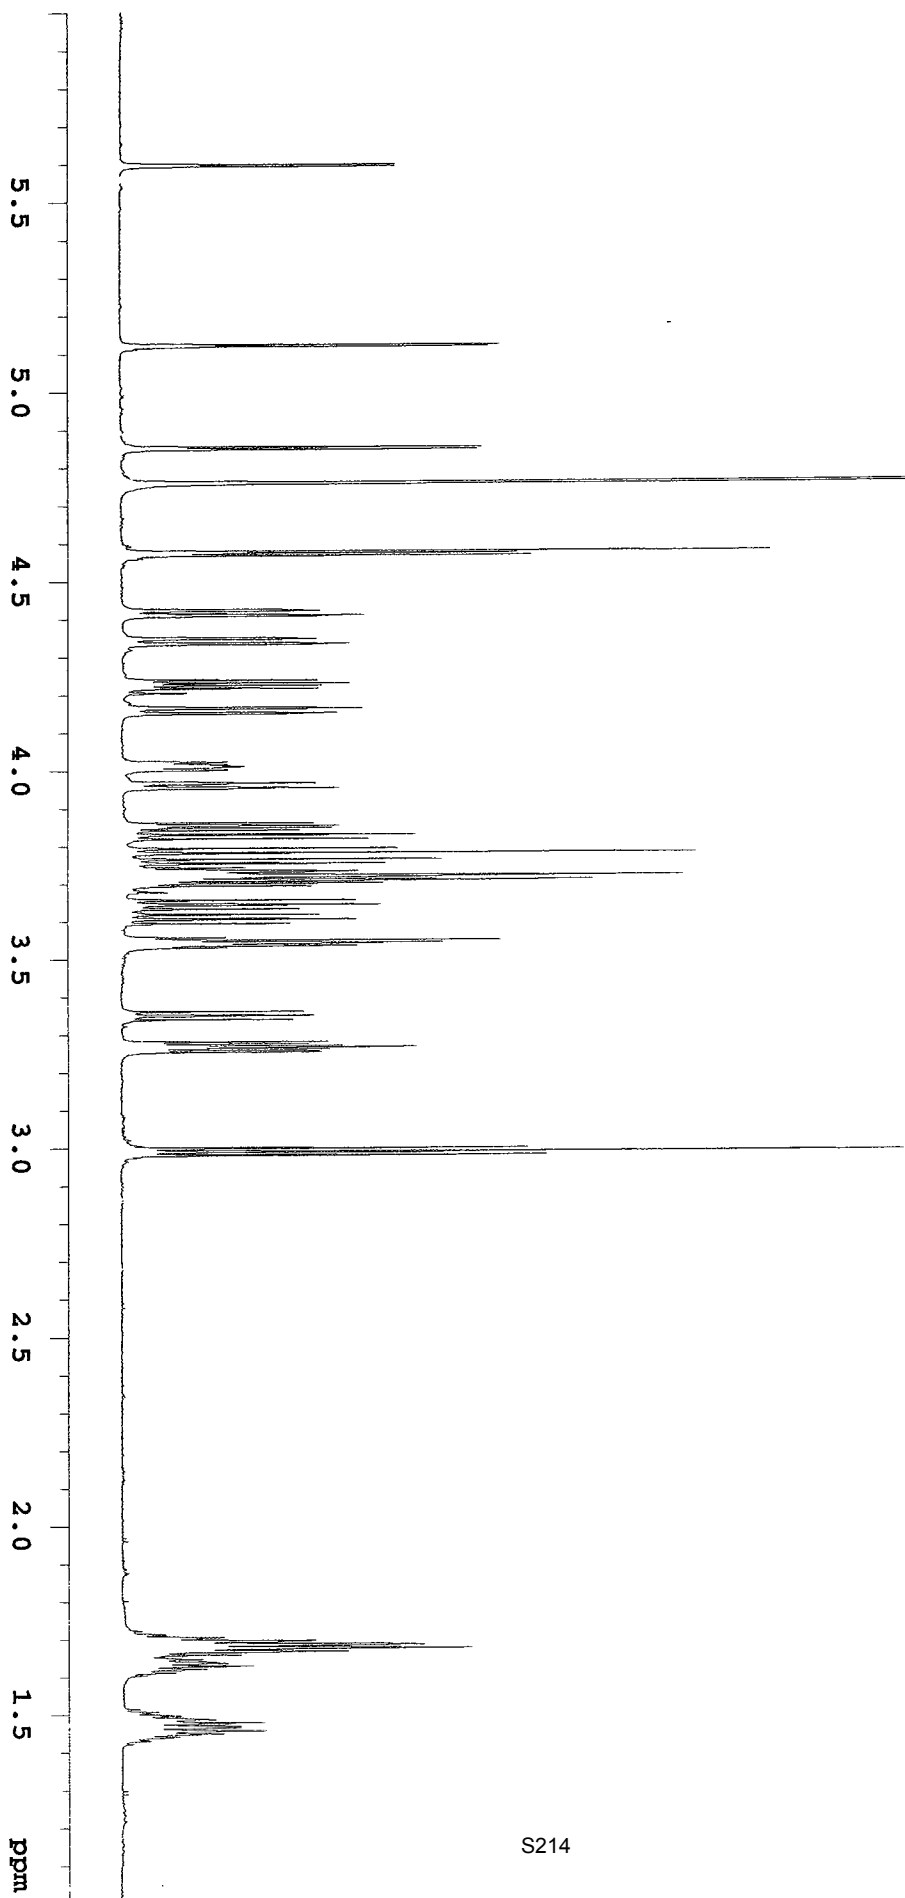

$\alpha$ -L-IdoA(1-4)- $\alpha$ -D-GlcNAc(6S)(1-4)- $\alpha$ -L-IdoA(1-4)- $\alpha$ -D-GlcNAc(6S)(1)-(CH<sub>2</sub>)<sub>5</sub>NH<sub>2</sub> (82)

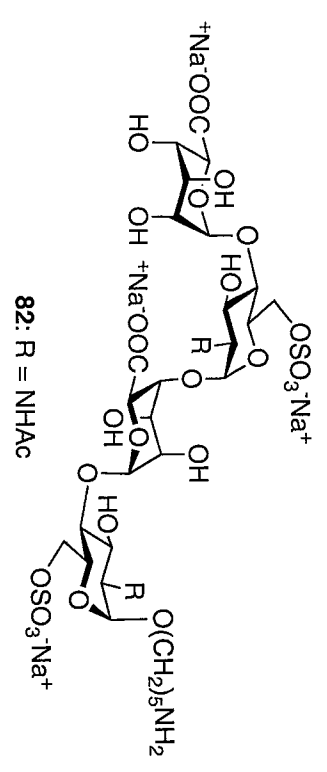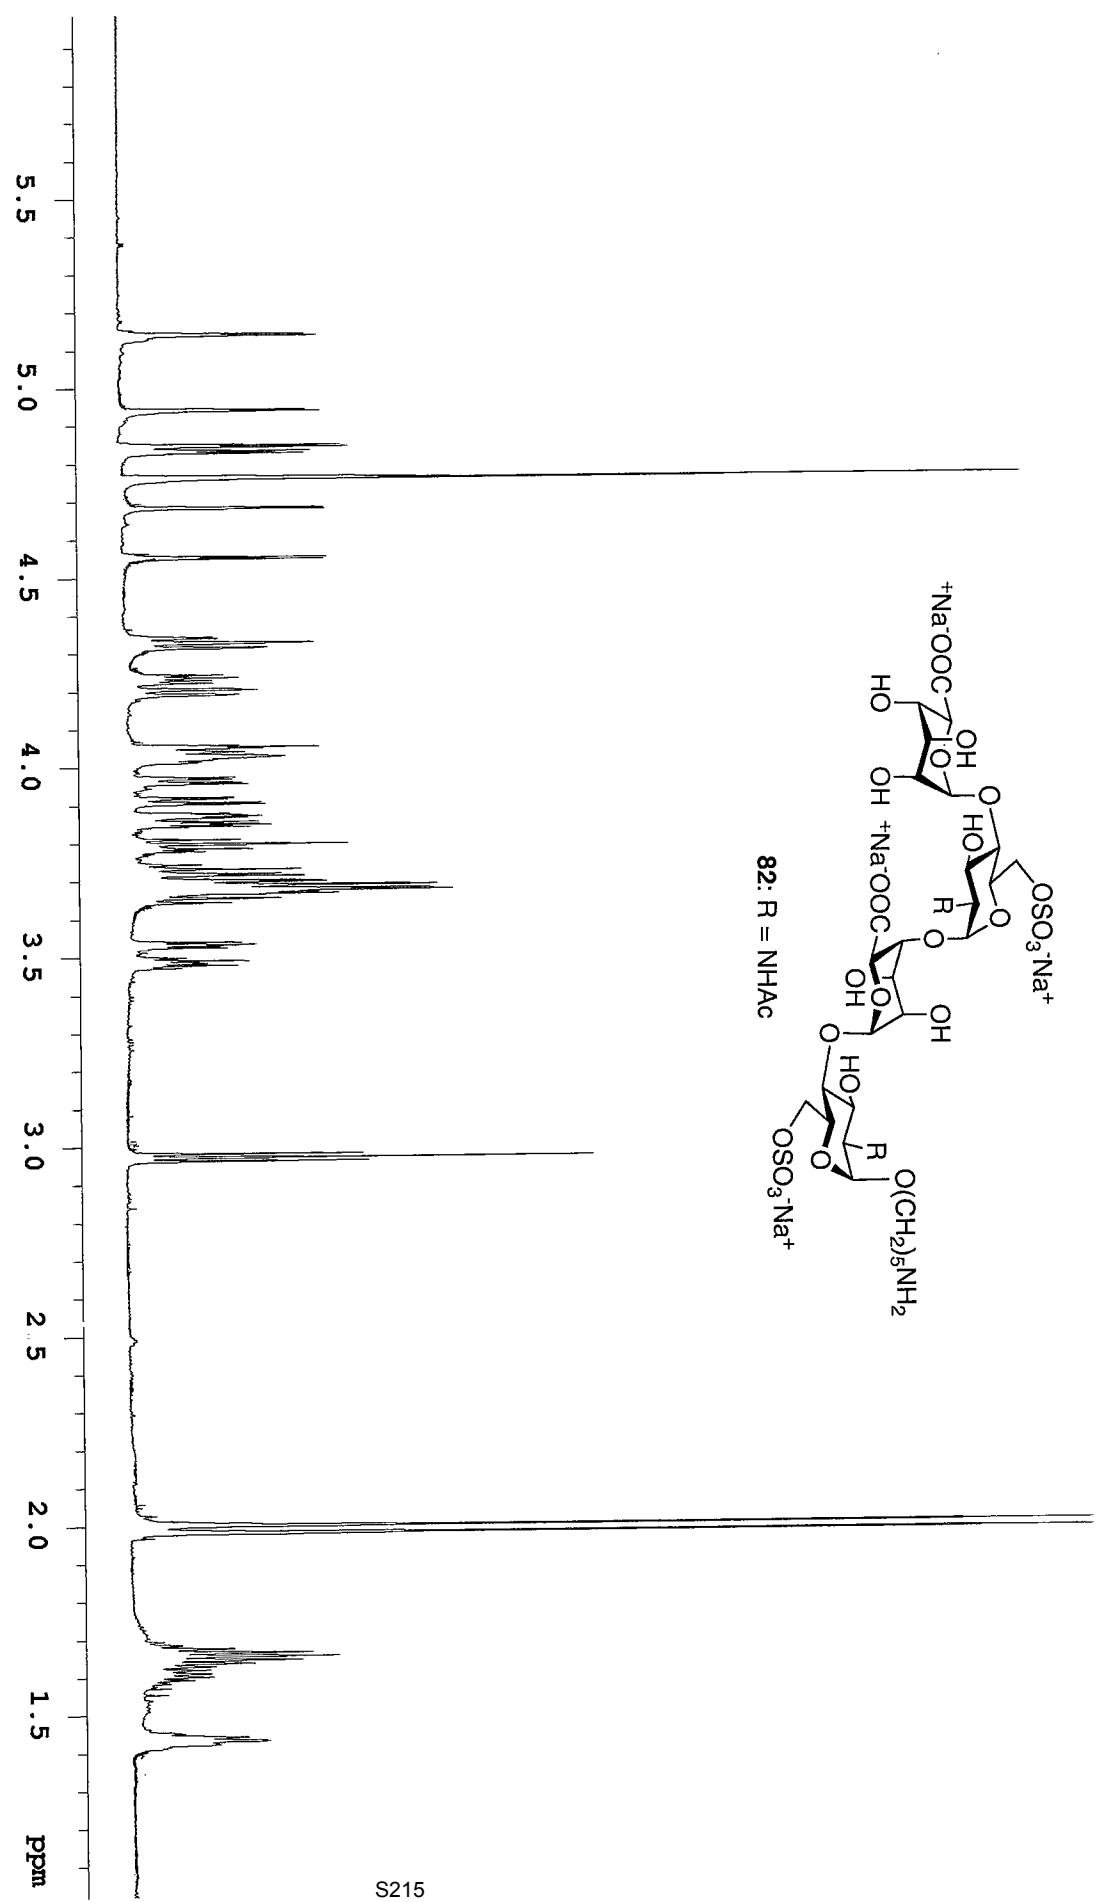

$\alpha$ -L-IdoA(1-4)- $\alpha$ -D-GlcNS(6S)(1-4)- $\alpha$ -L-IdoA(1-4)- $\alpha$ -D-GlcNS(6S)(1)-(CH<sub>2</sub>)<sub>5</sub>NH<sub>2</sub>, . . .

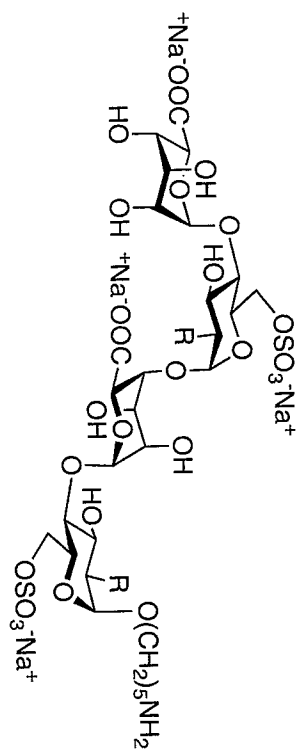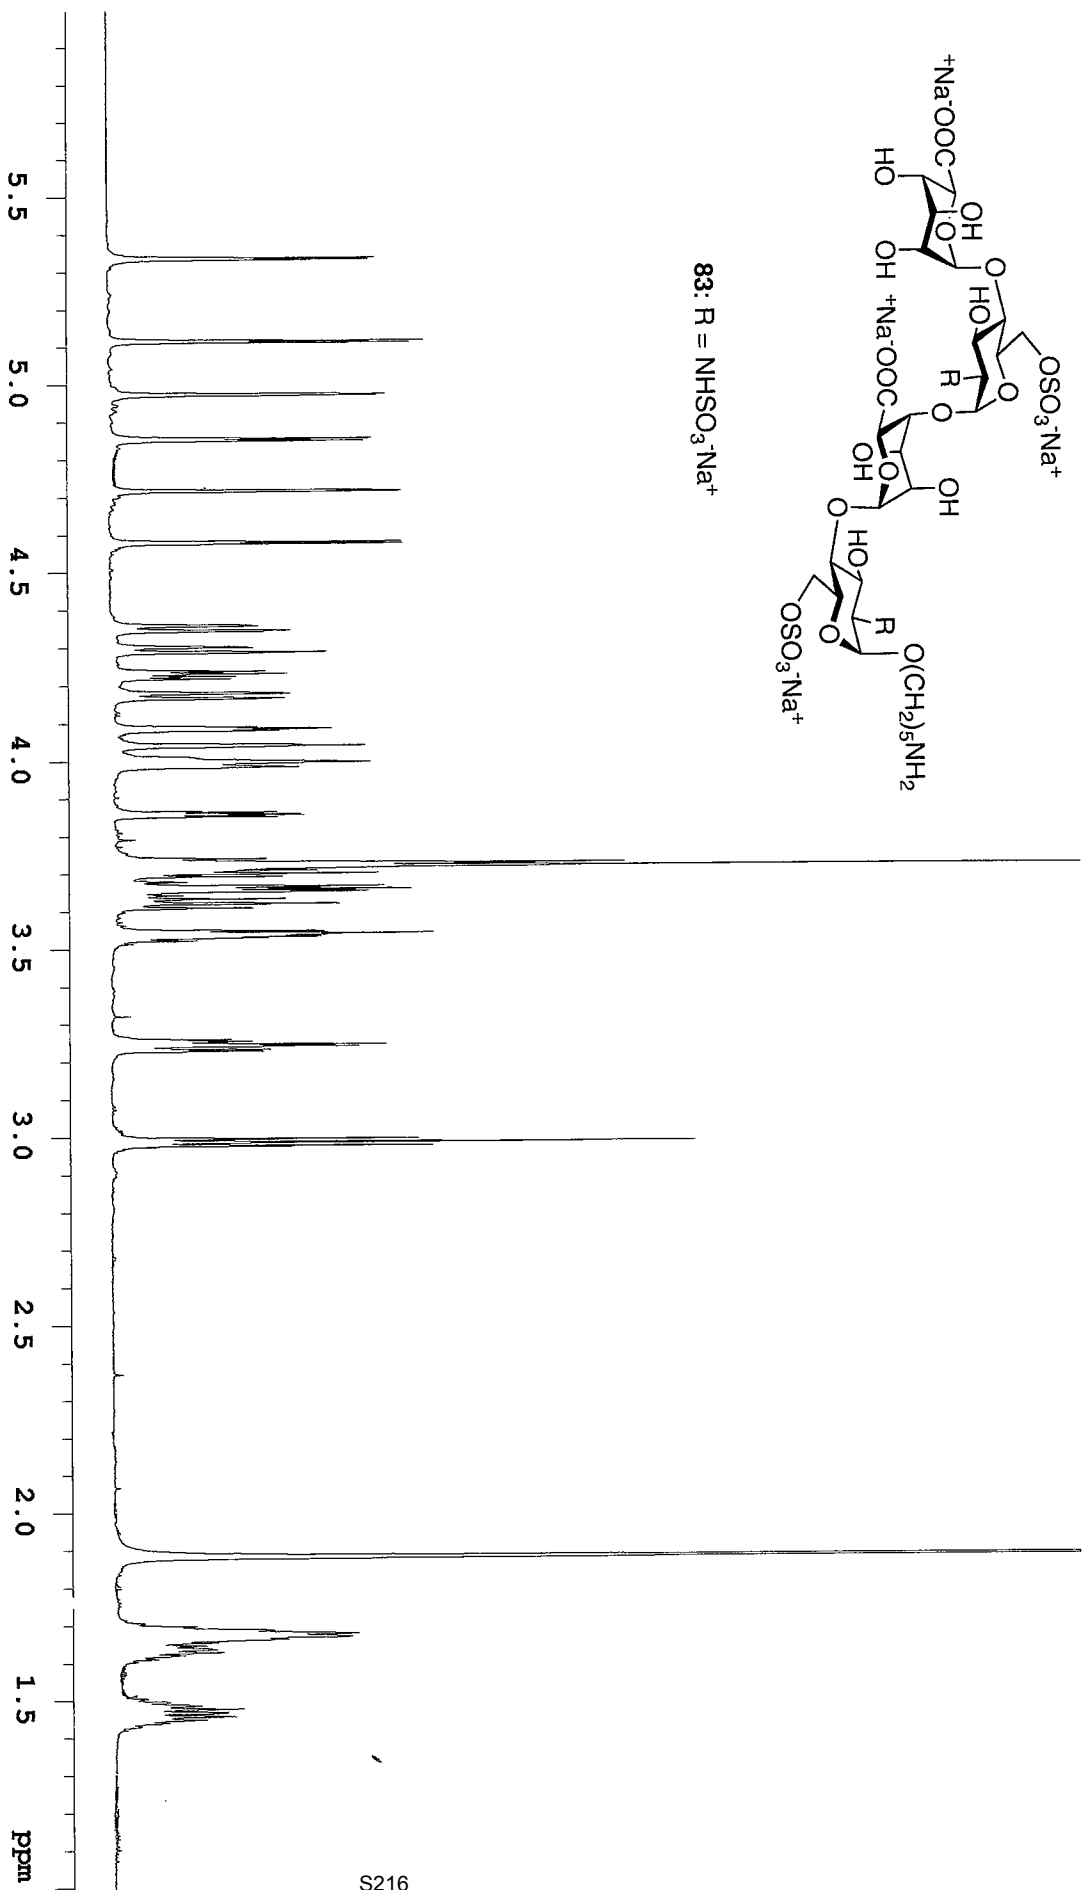



$\alpha$ -L-IdoA(1-4)- $\alpha$ -D-GlcNAc(6S)(1-4)- $\alpha$ -L-IdoA(2S)(1-4)- $\alpha$ -D-GlcNAc(6S)(1)-(CH<sub>2</sub>)<sub>5</sub>NH<sub>2</sub> (84)

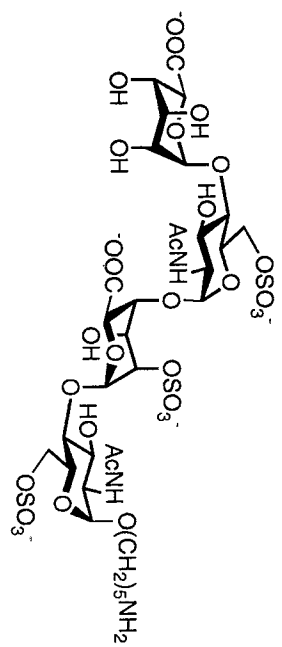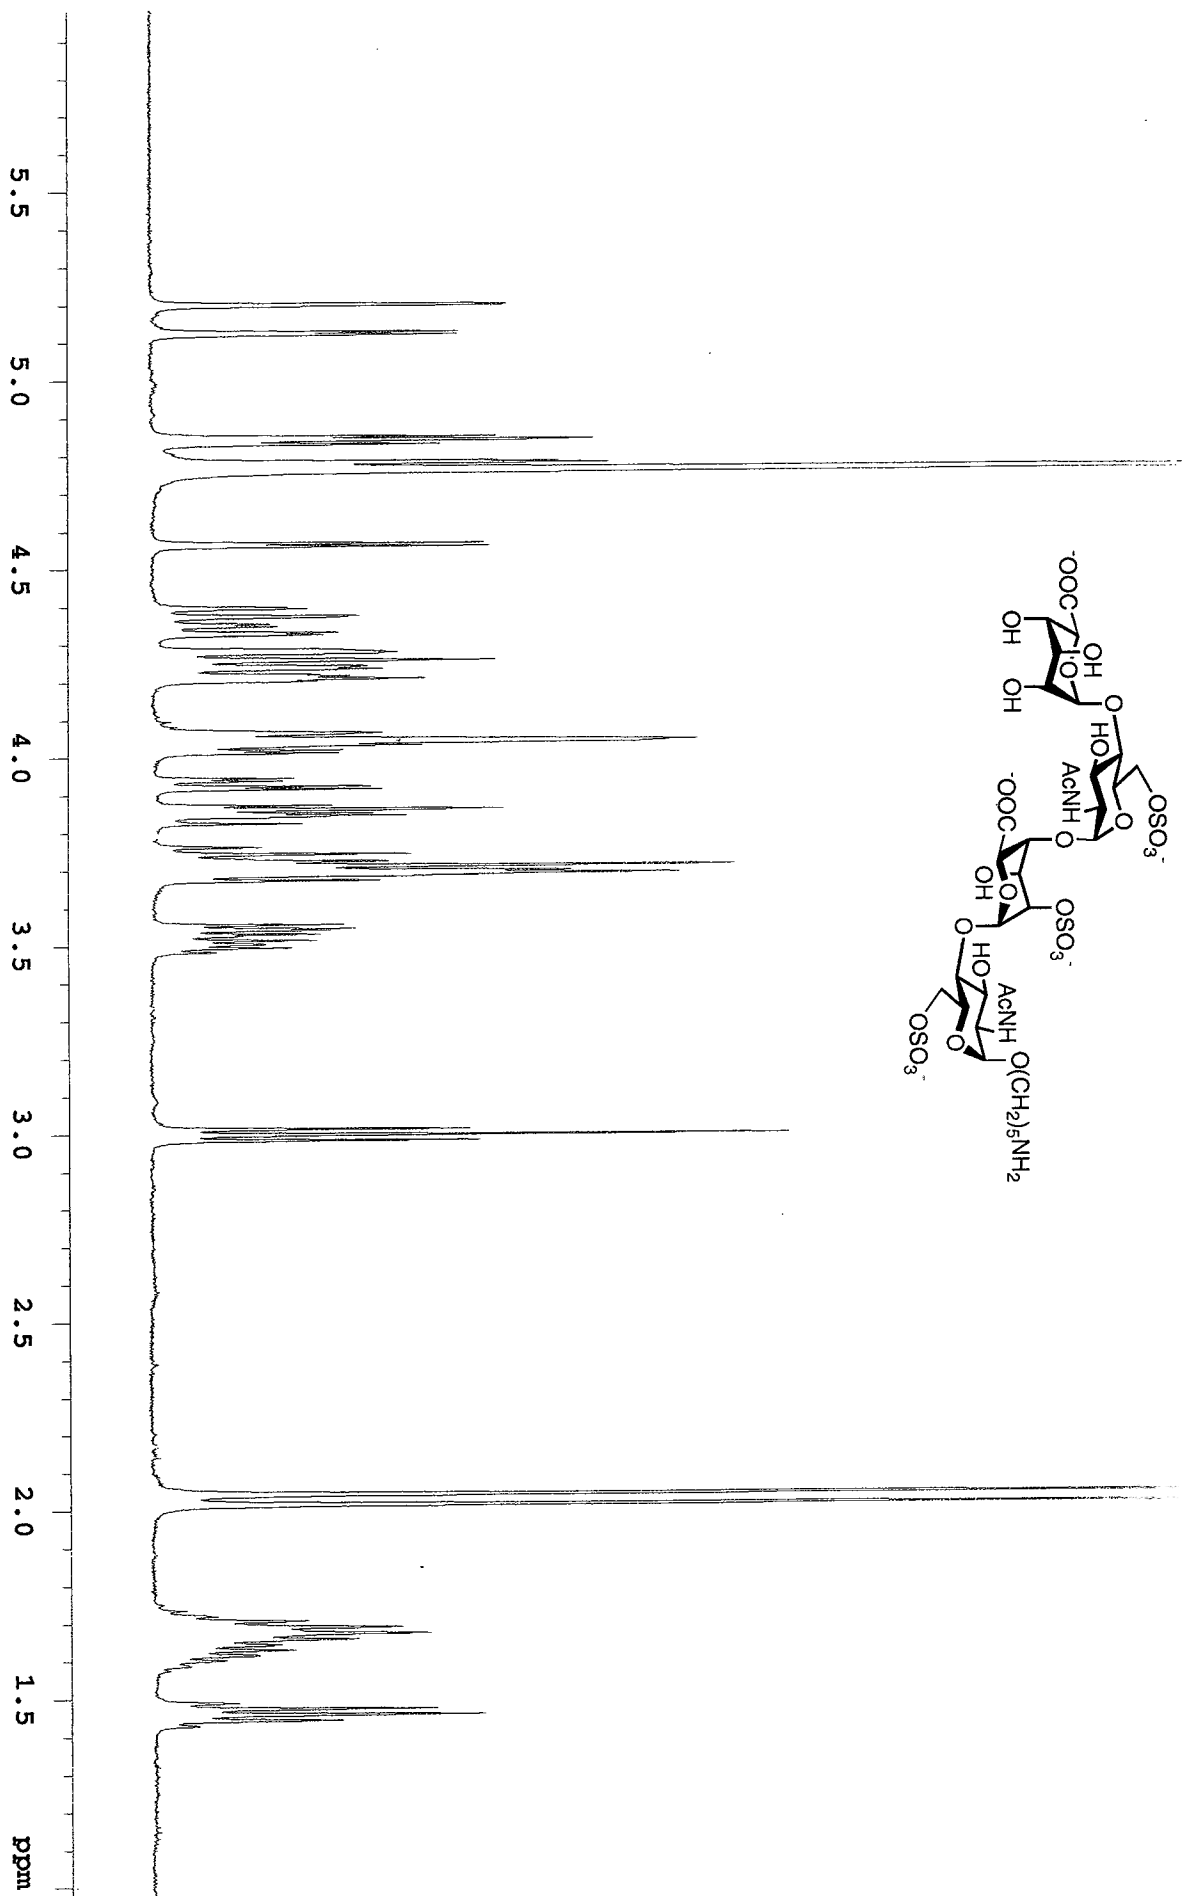

$\beta$ -D-GlucA(1-4)- $\alpha$ -D-GlcNAc(6S)(1-4)- $\alpha$ -L-IdoA(2S)(1-4)- $\alpha$ -D-GlcNAc(6S)(1)-(CH<sub>2</sub>)<sub>5</sub>NH<sub>2</sub> (85)

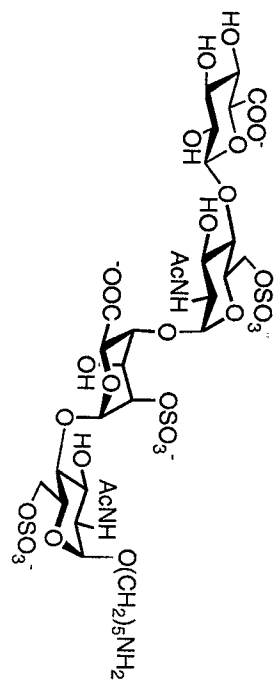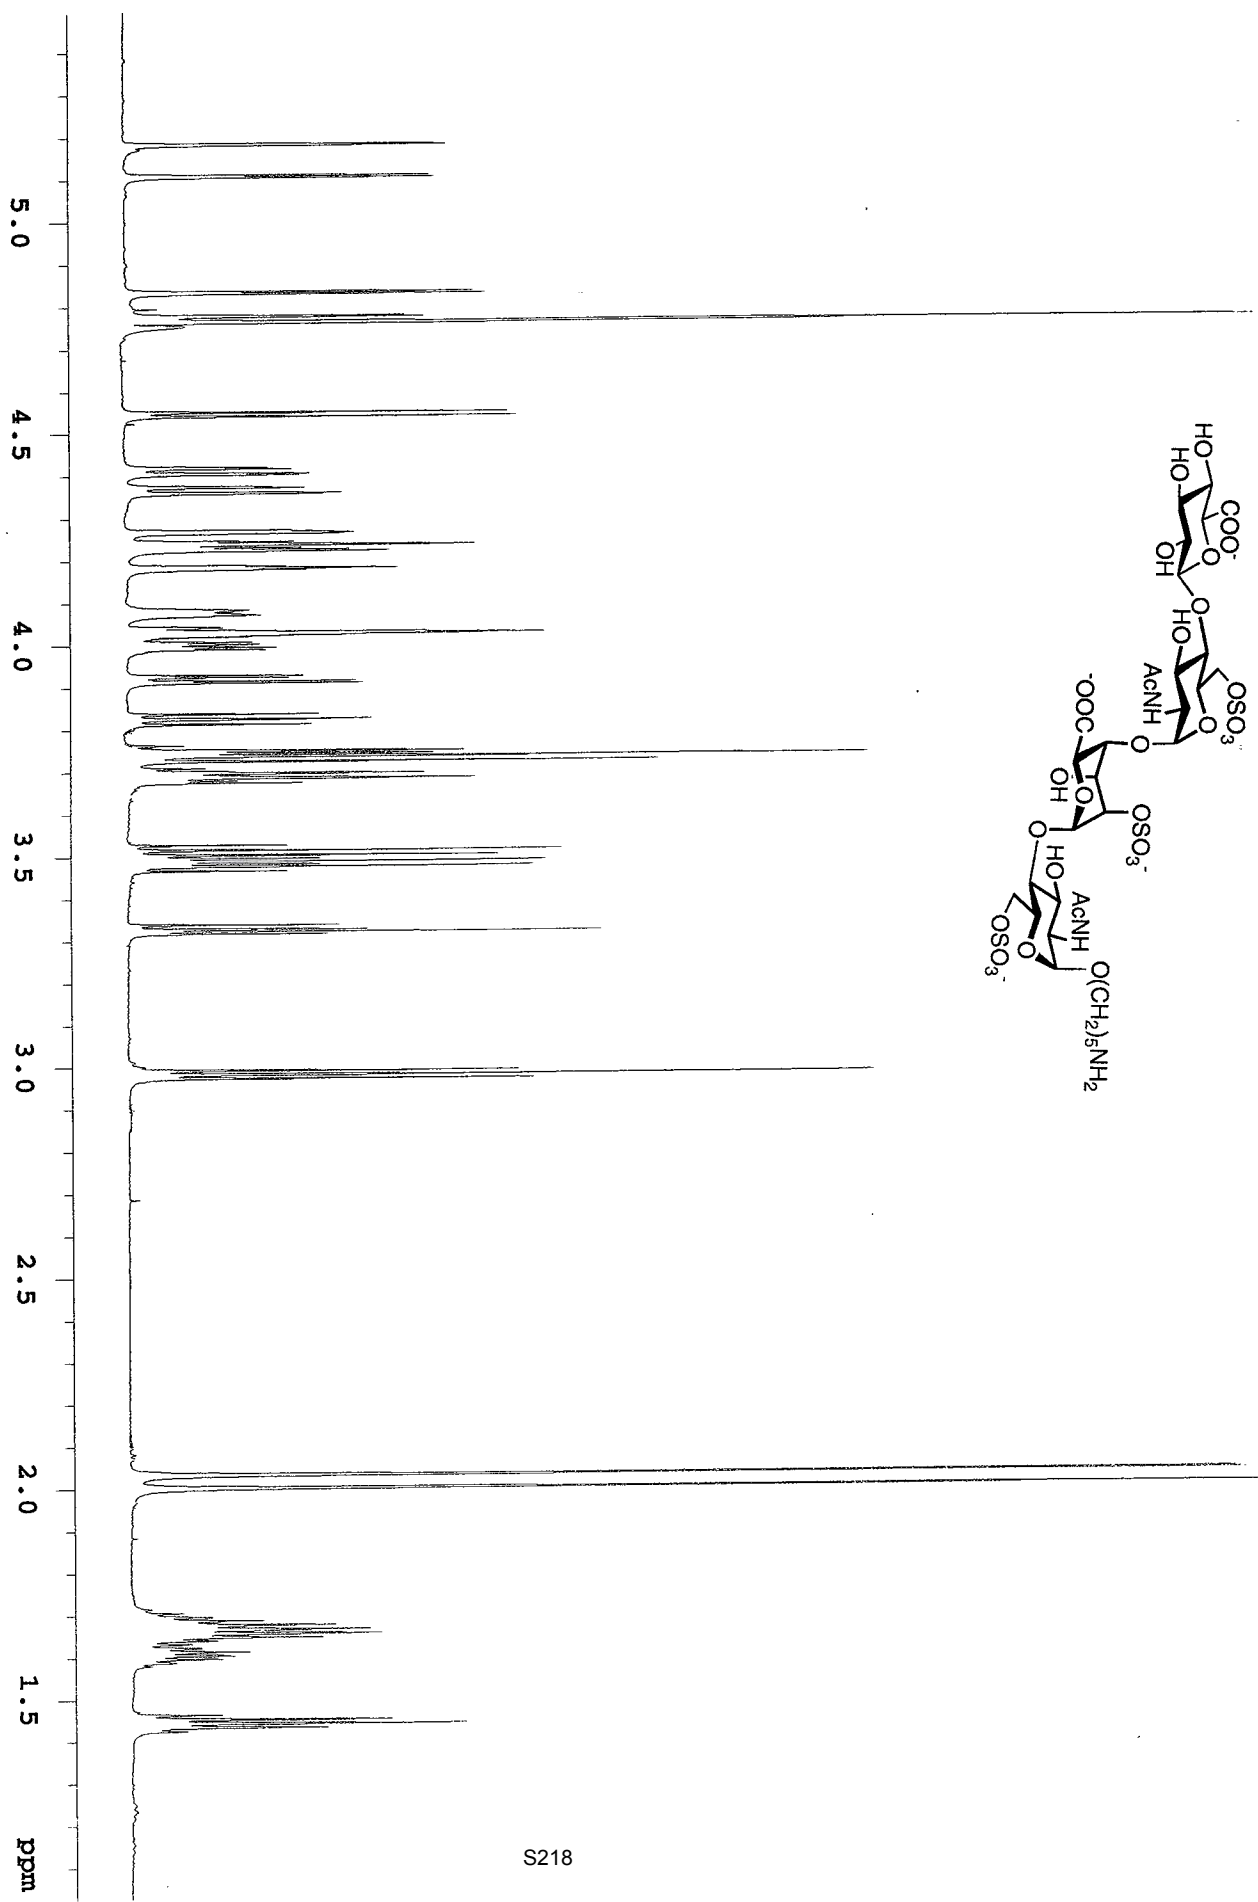

$\beta$ -D-GlcA(1-4)- $\alpha$ -D-GlcNS(6S)(1-4)- $\alpha$ -L-IdoA(2S)(1-4)- $\alpha$ -D-GlcNS(6S)(1)-(CH<sub>2</sub>)<sub>5</sub>NH<sub>2</sub> (86)

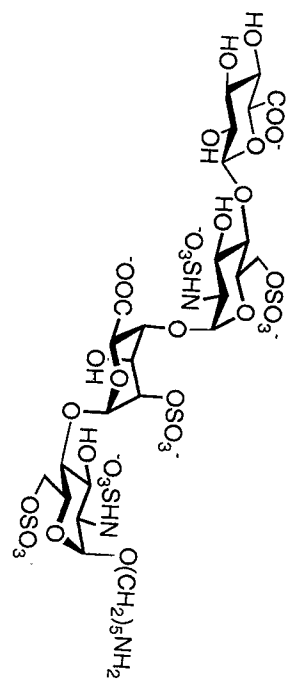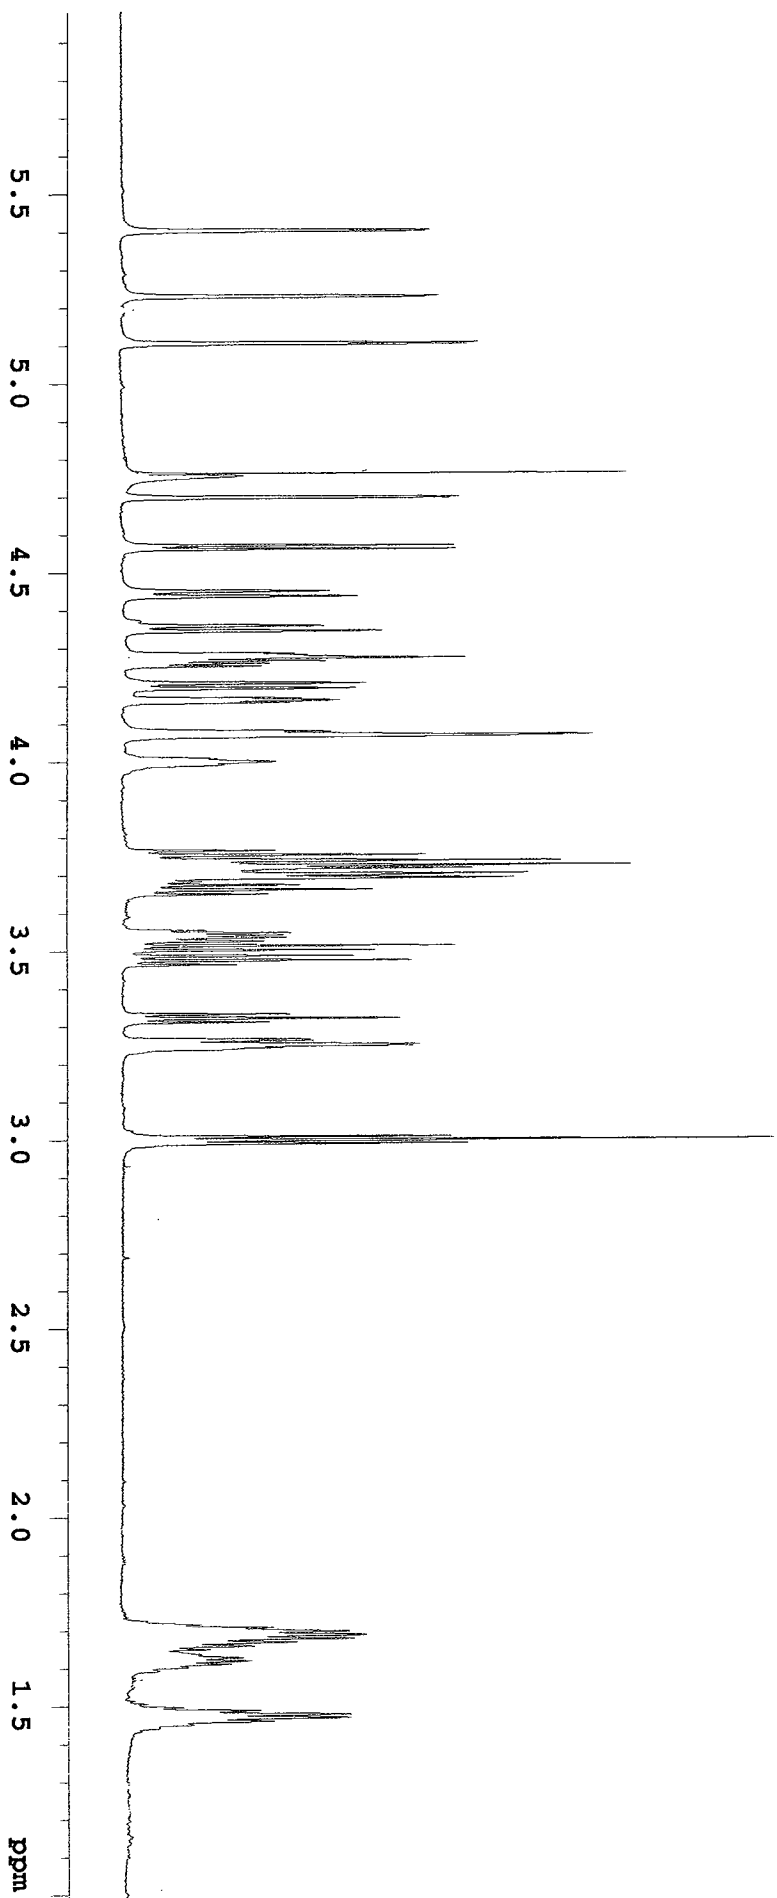

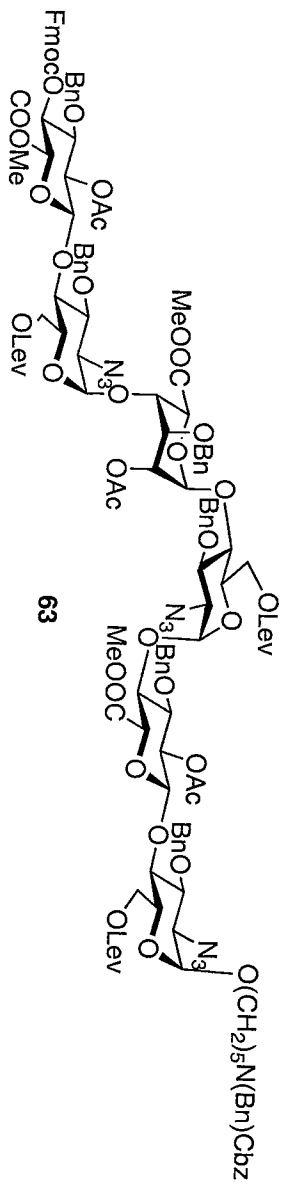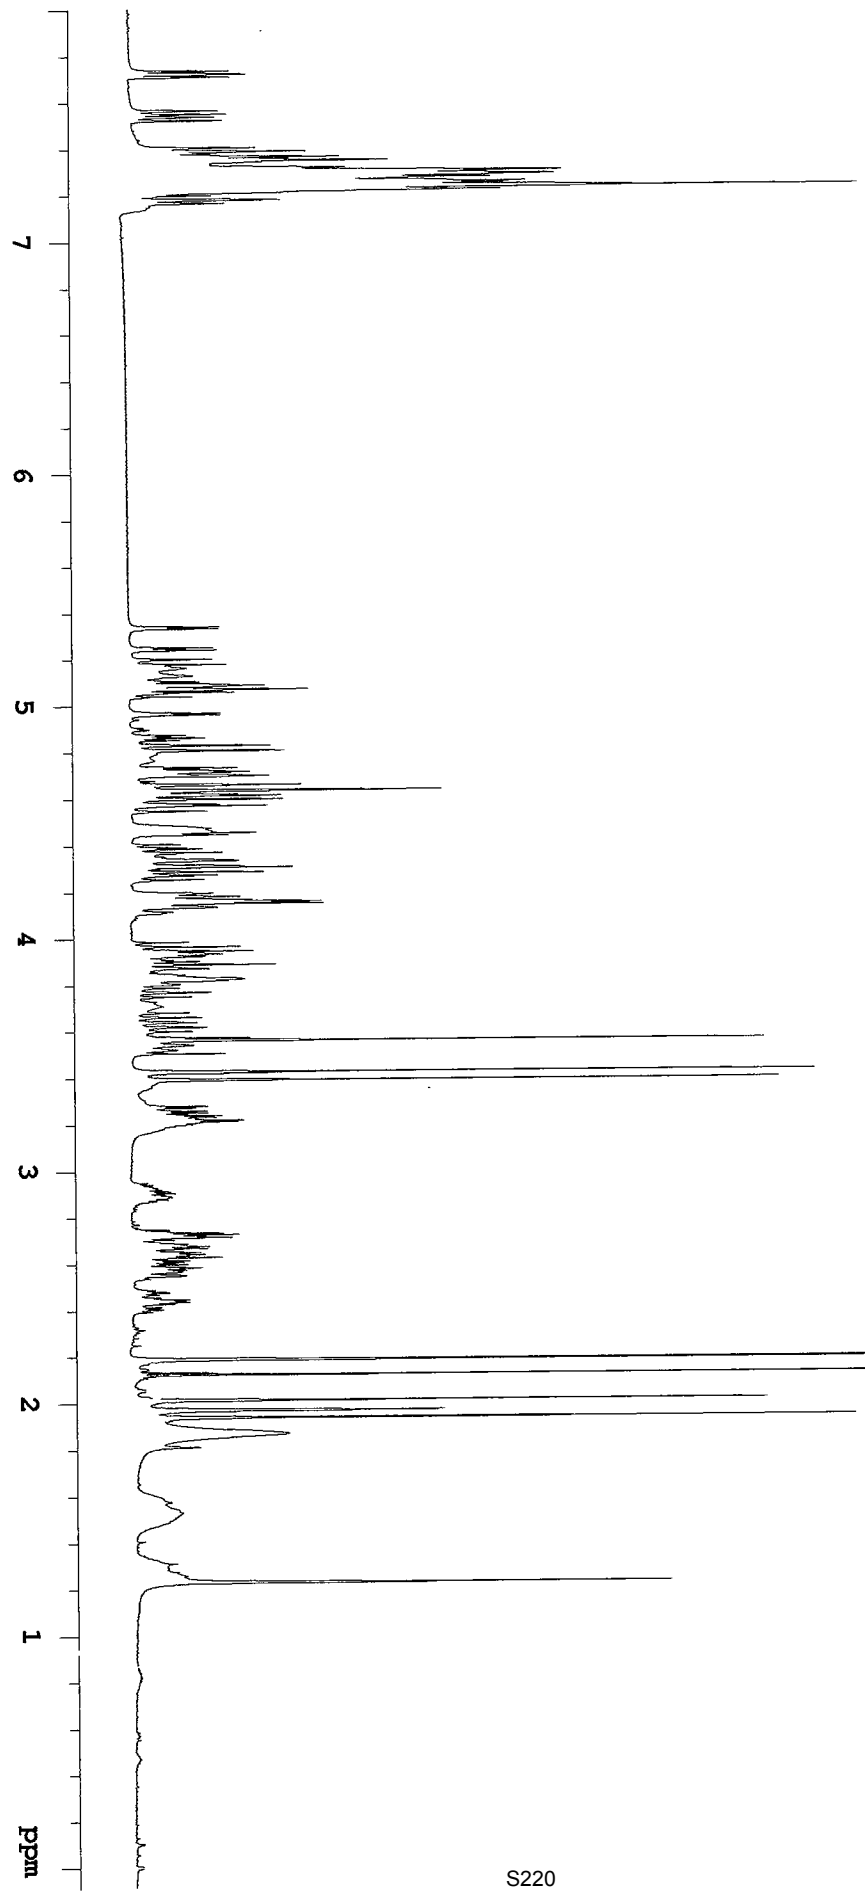

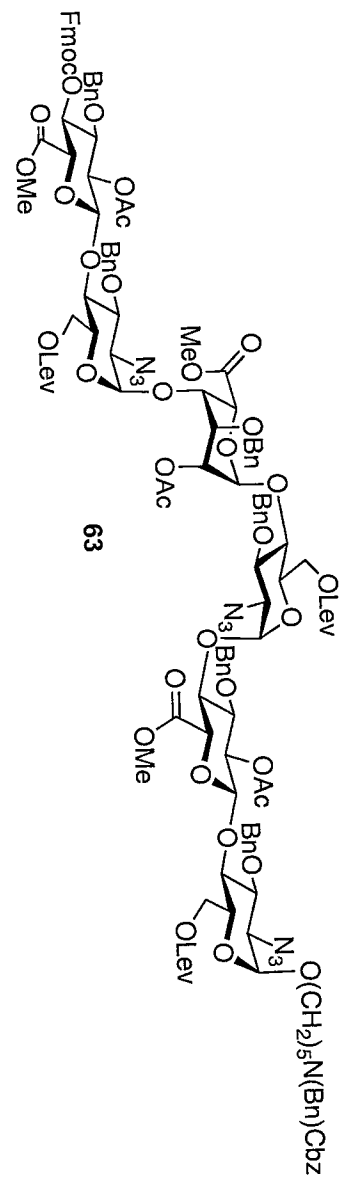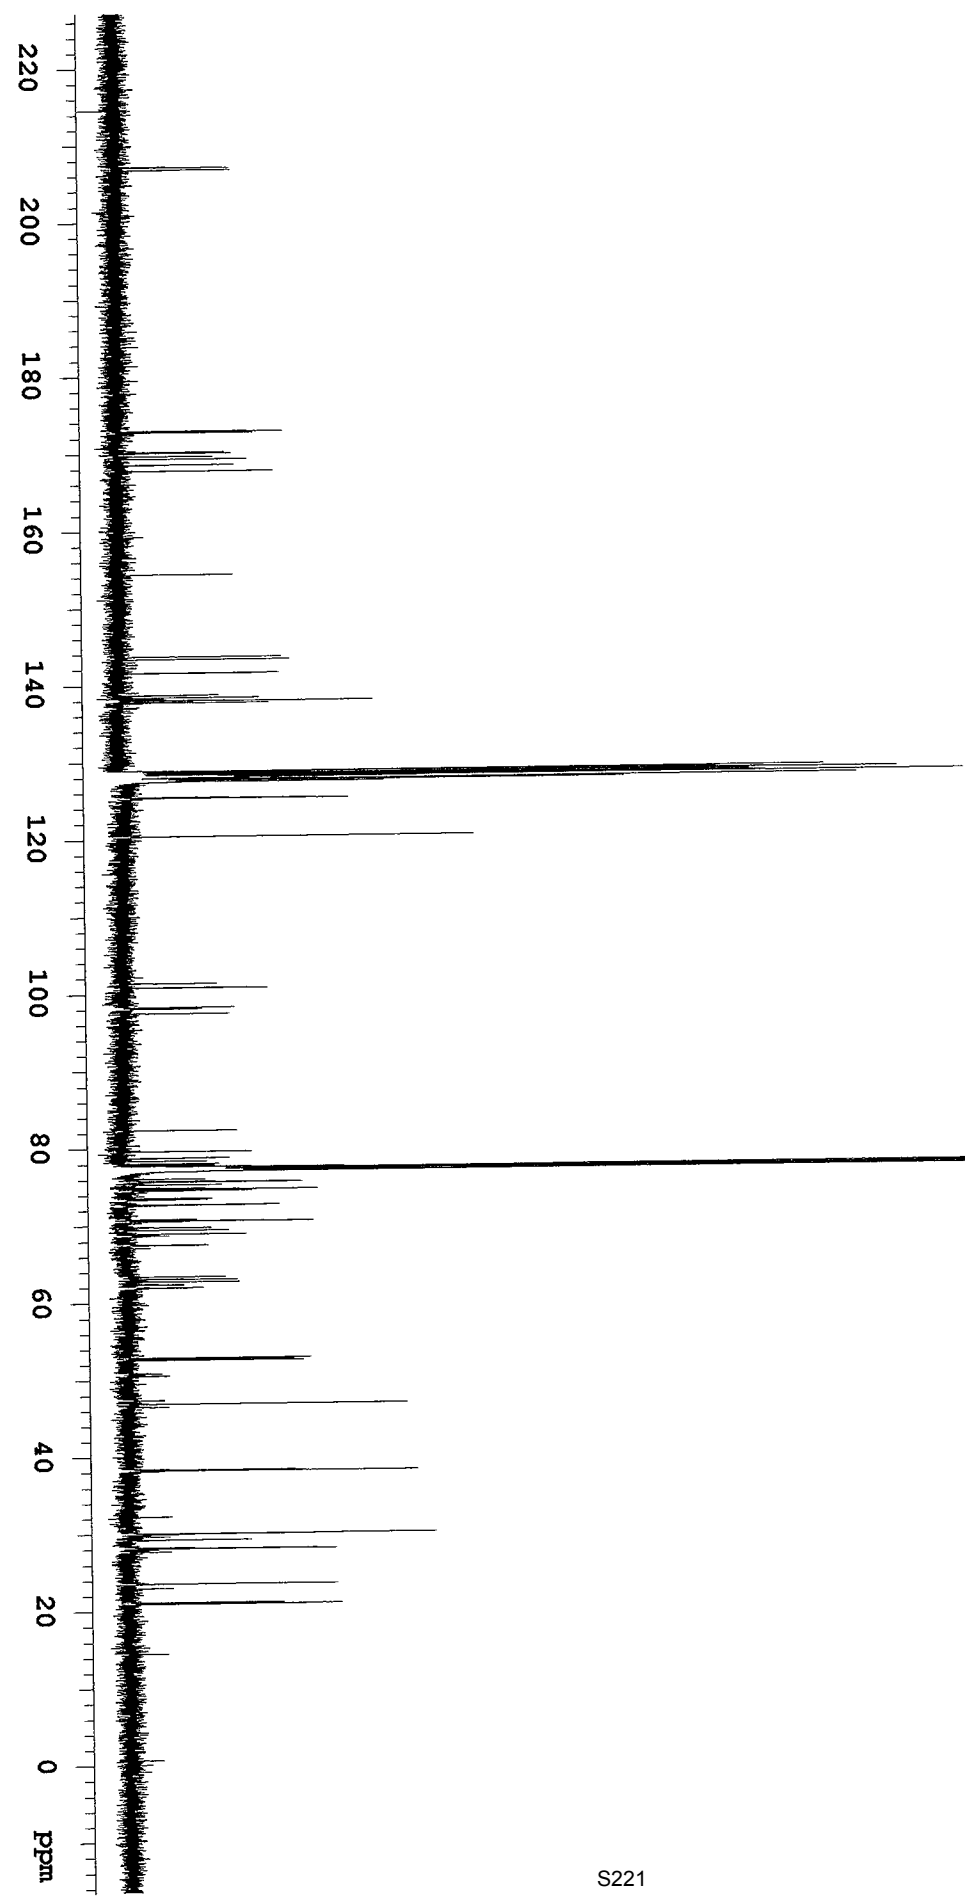

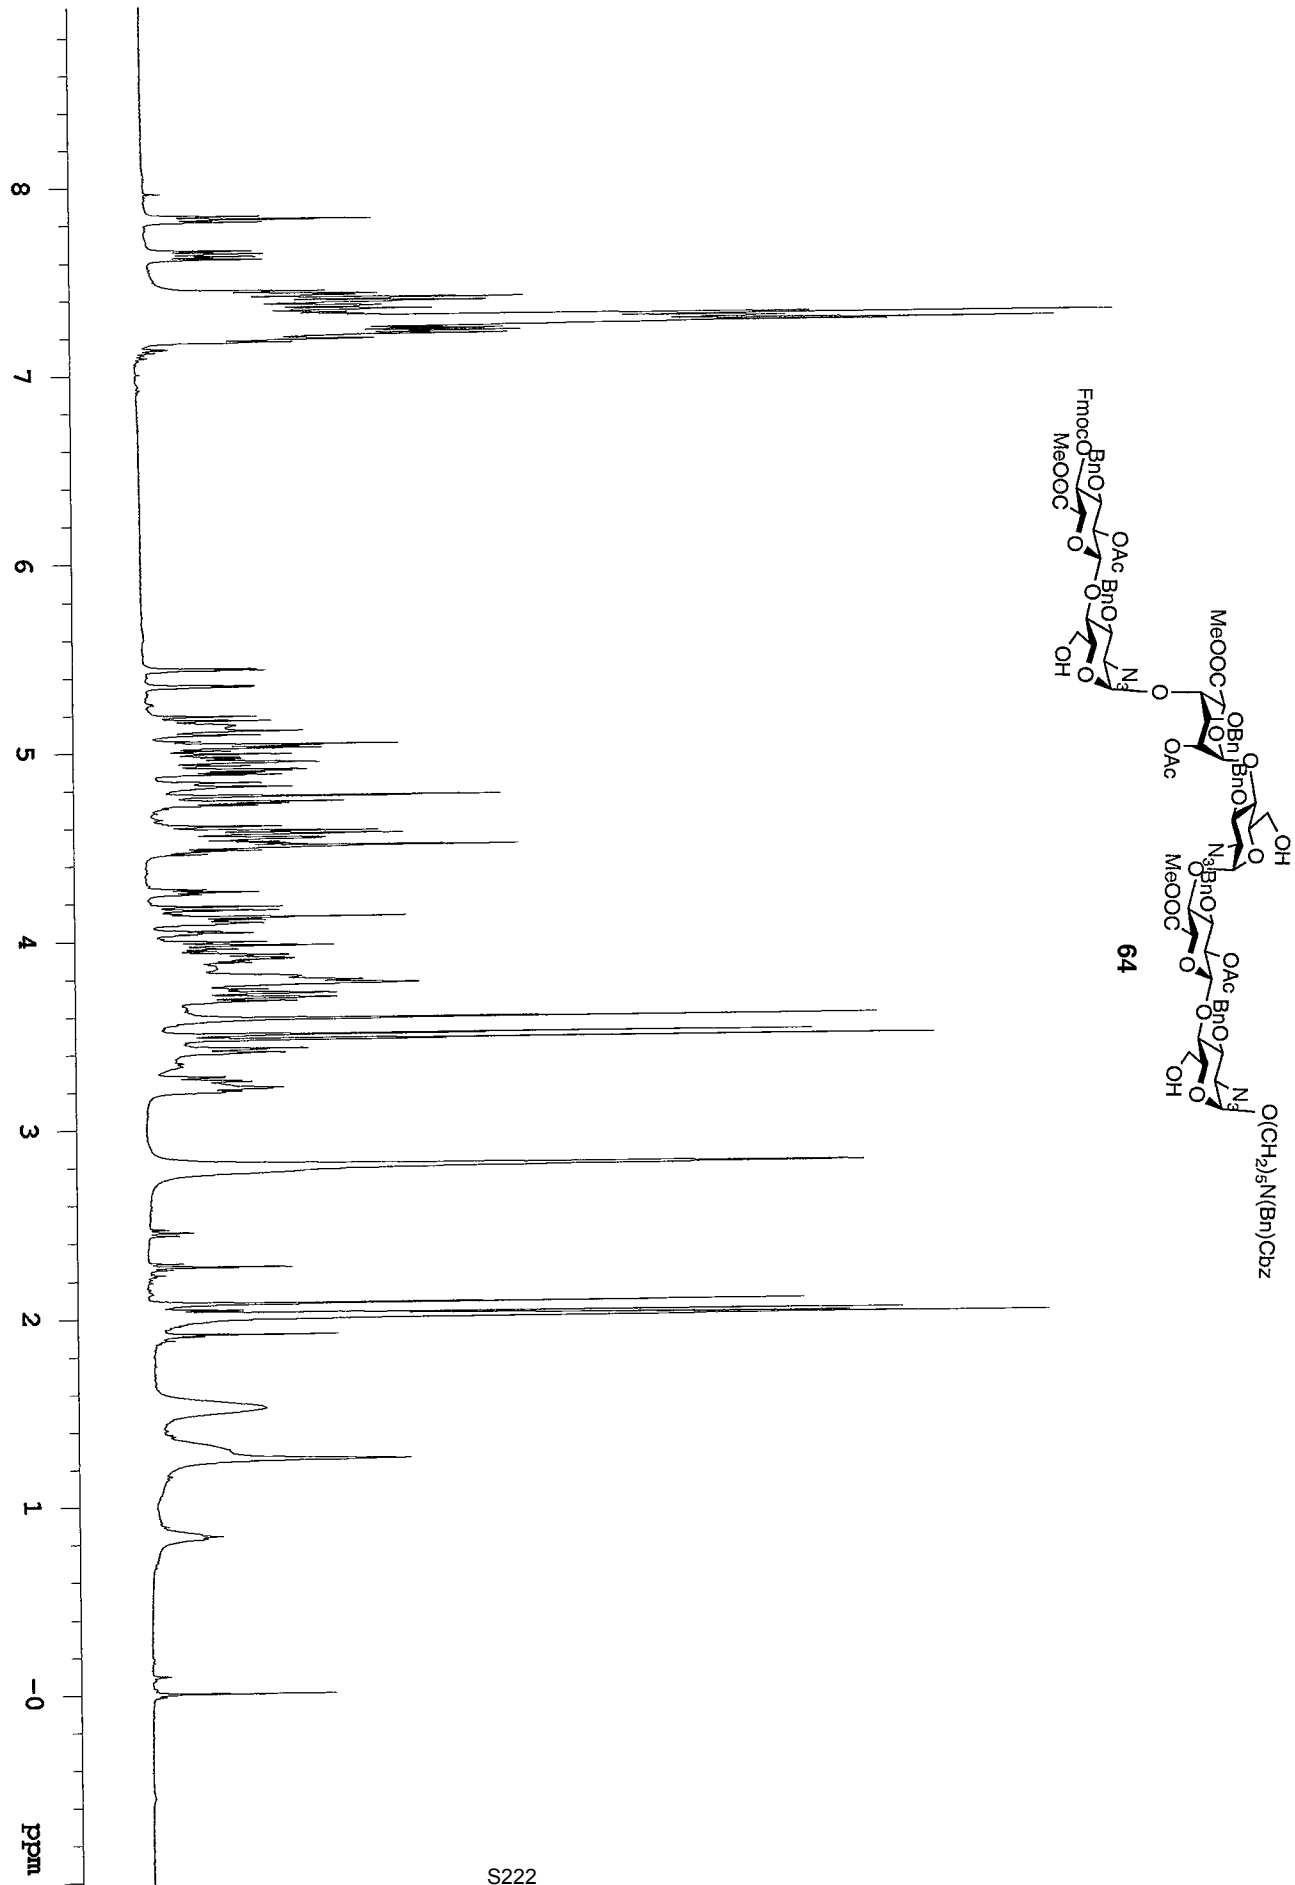

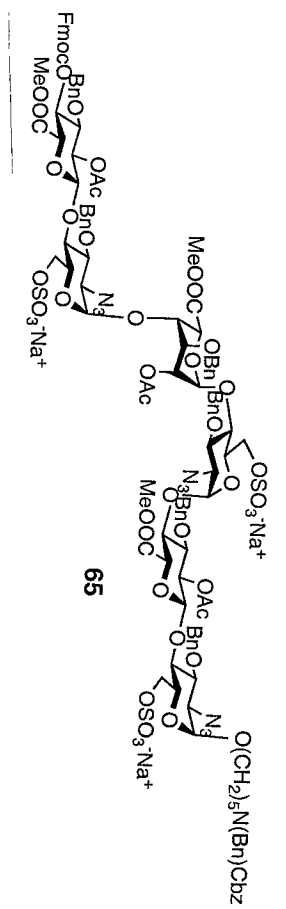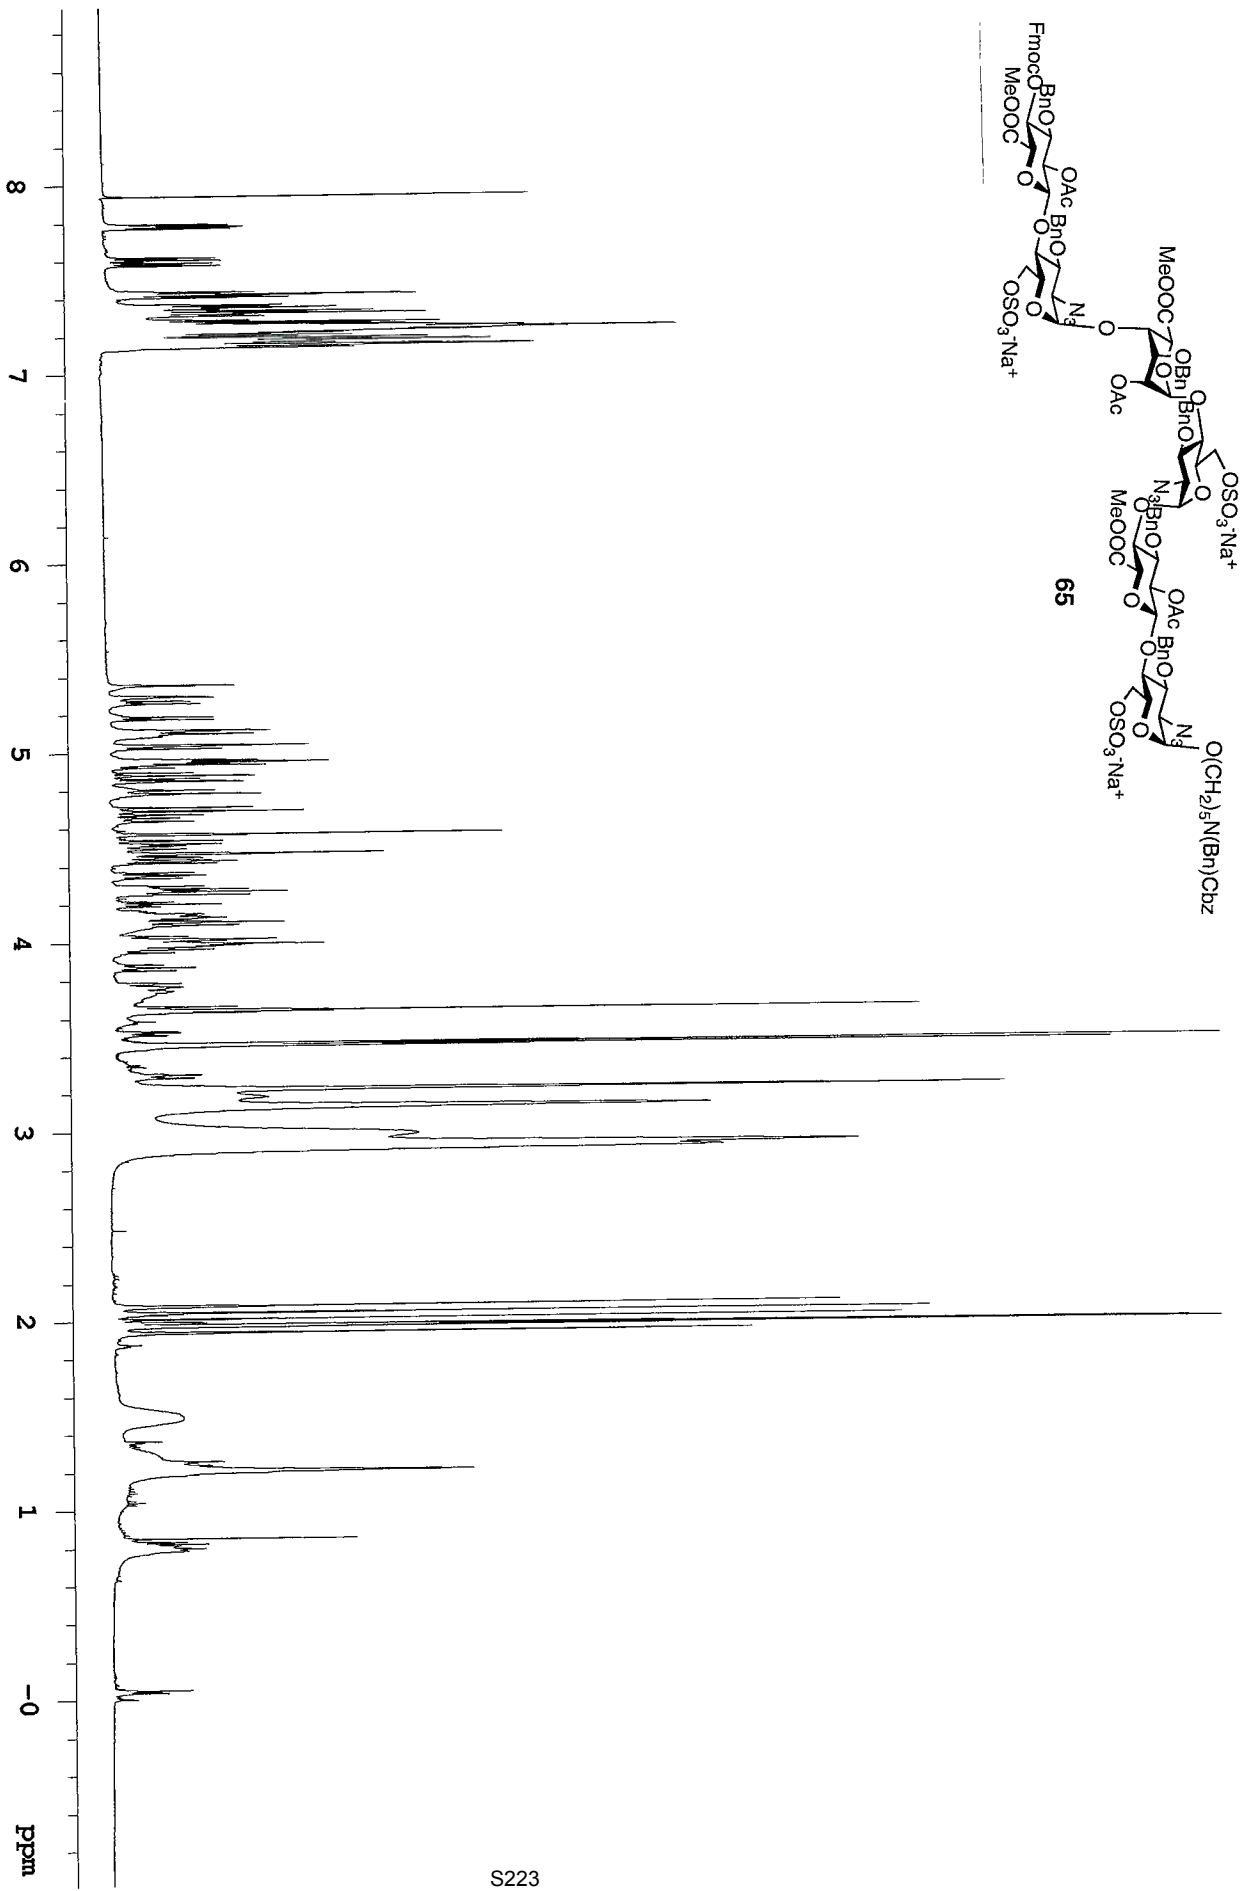

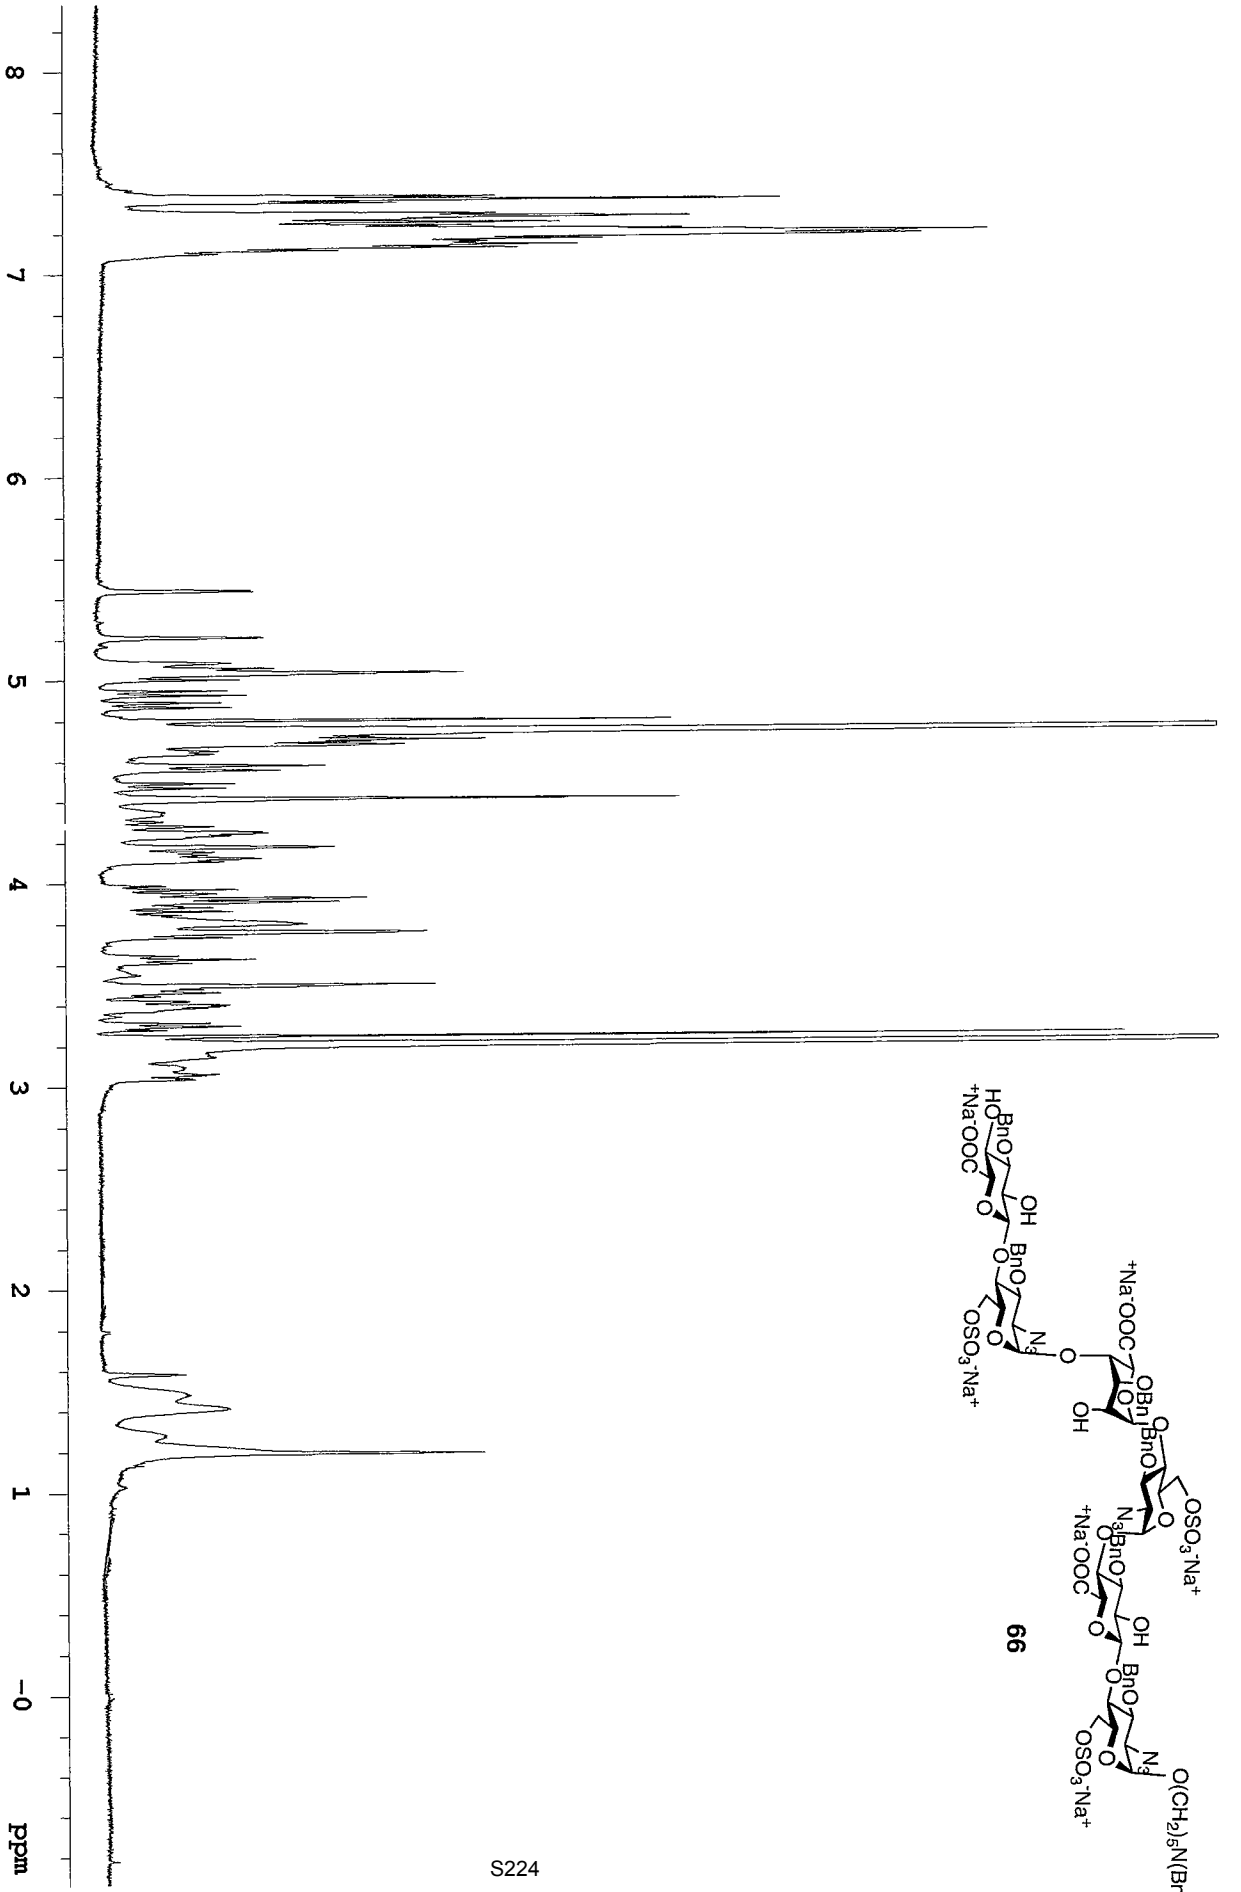





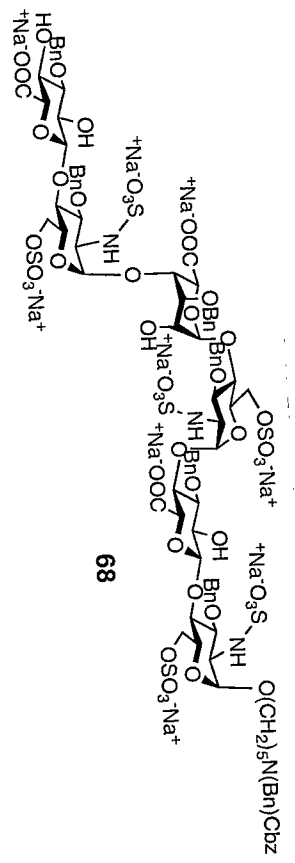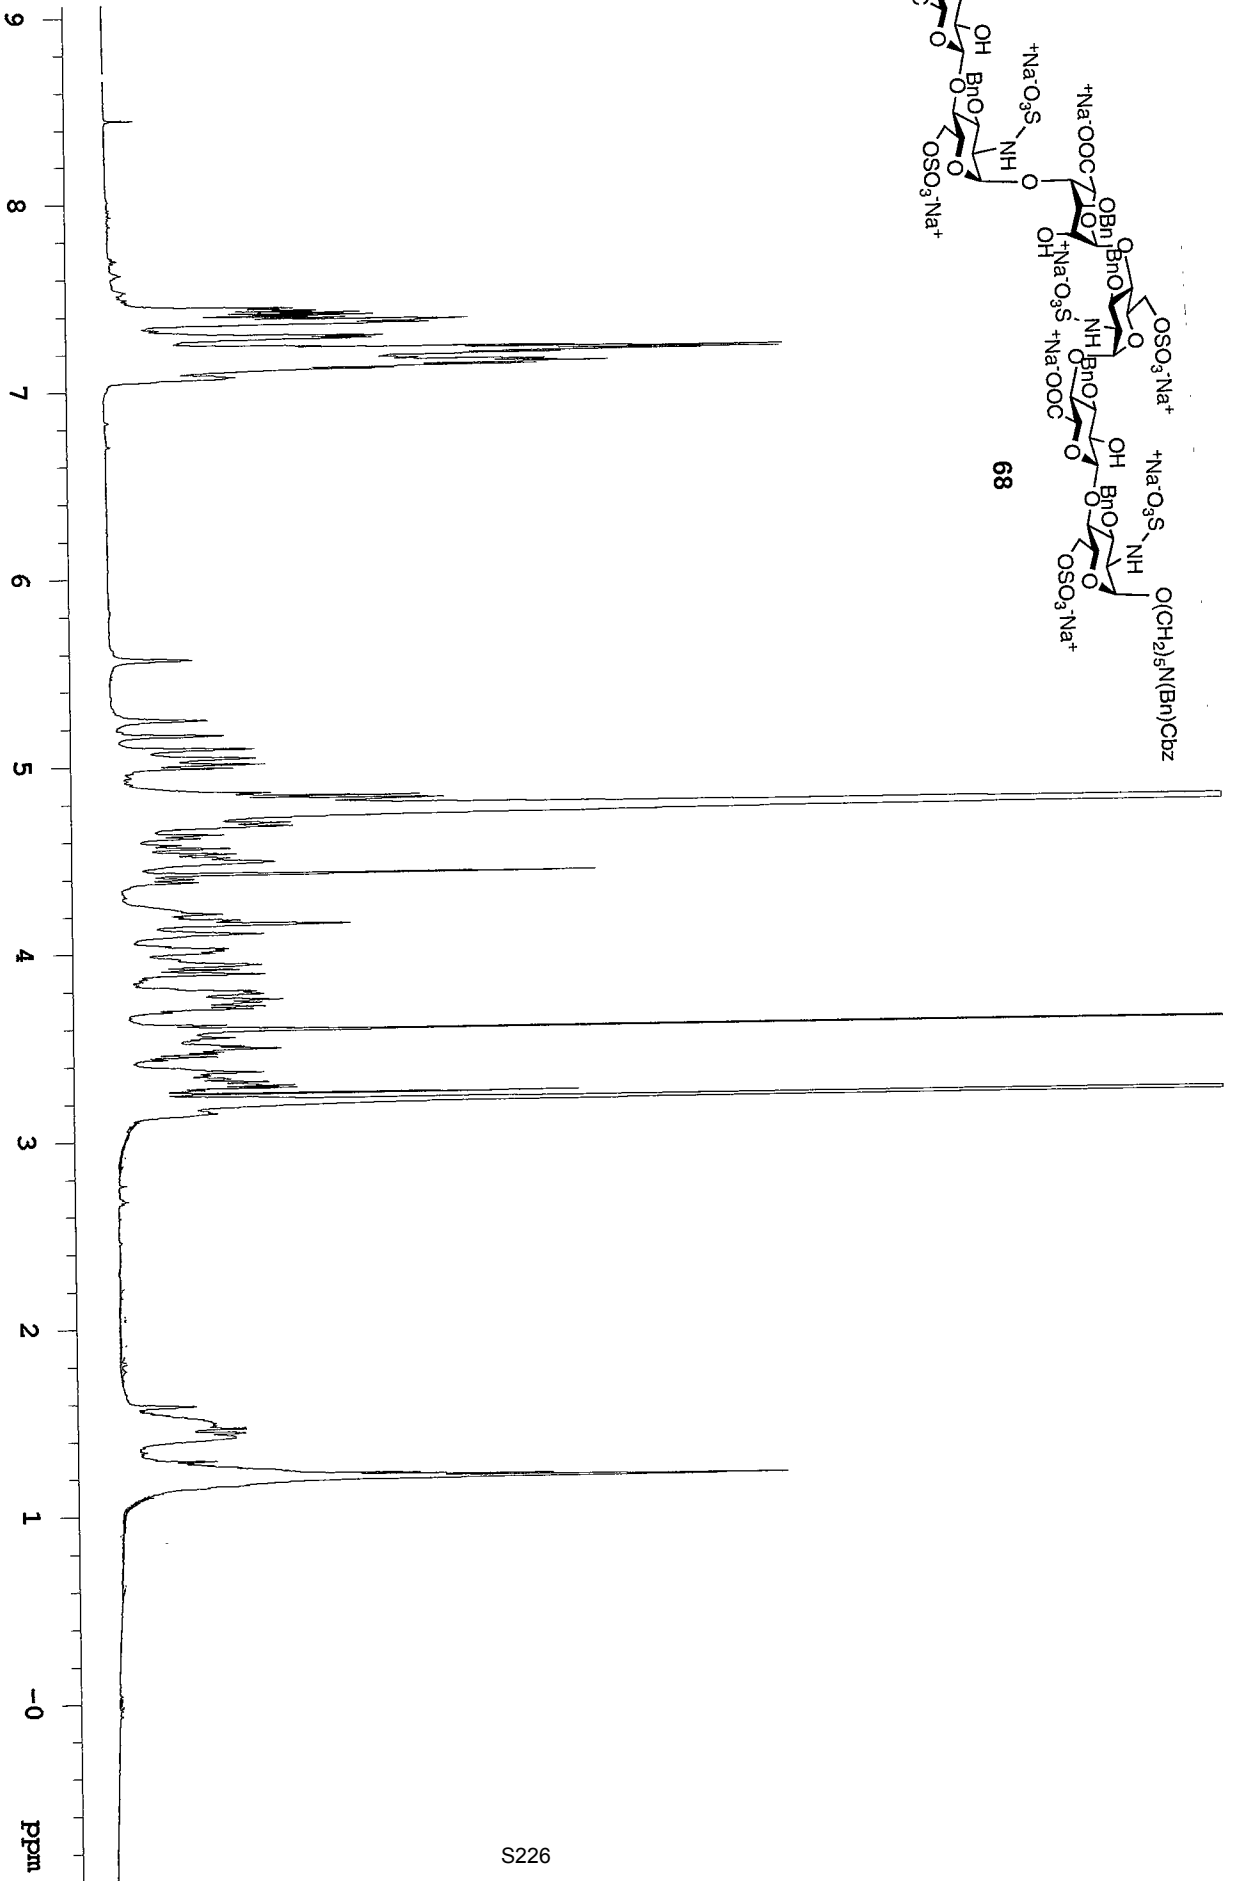

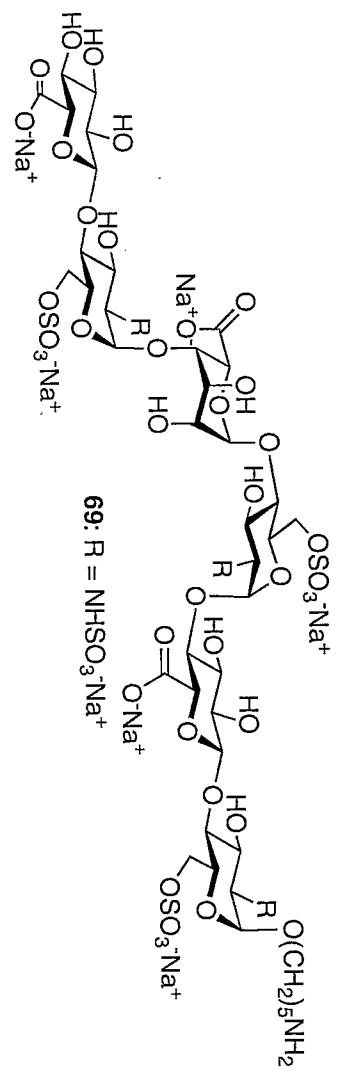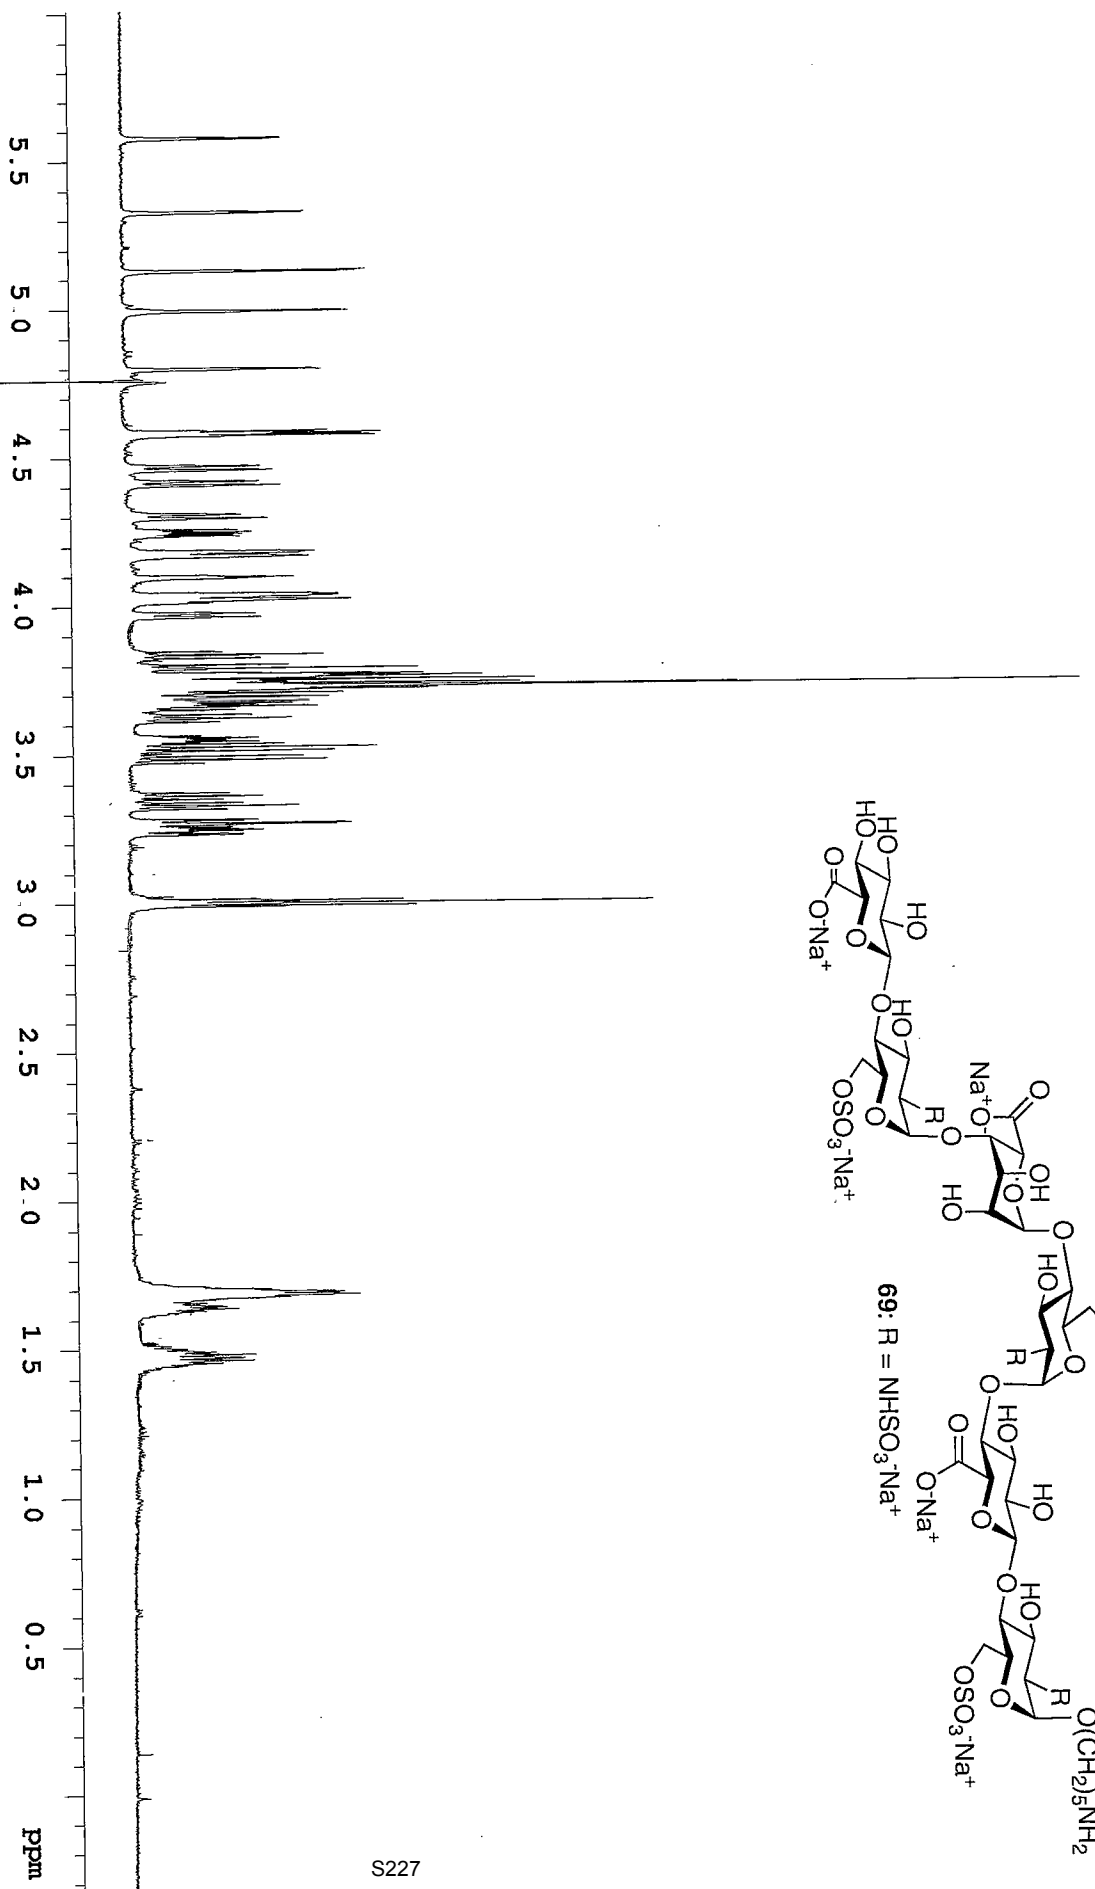

# 76

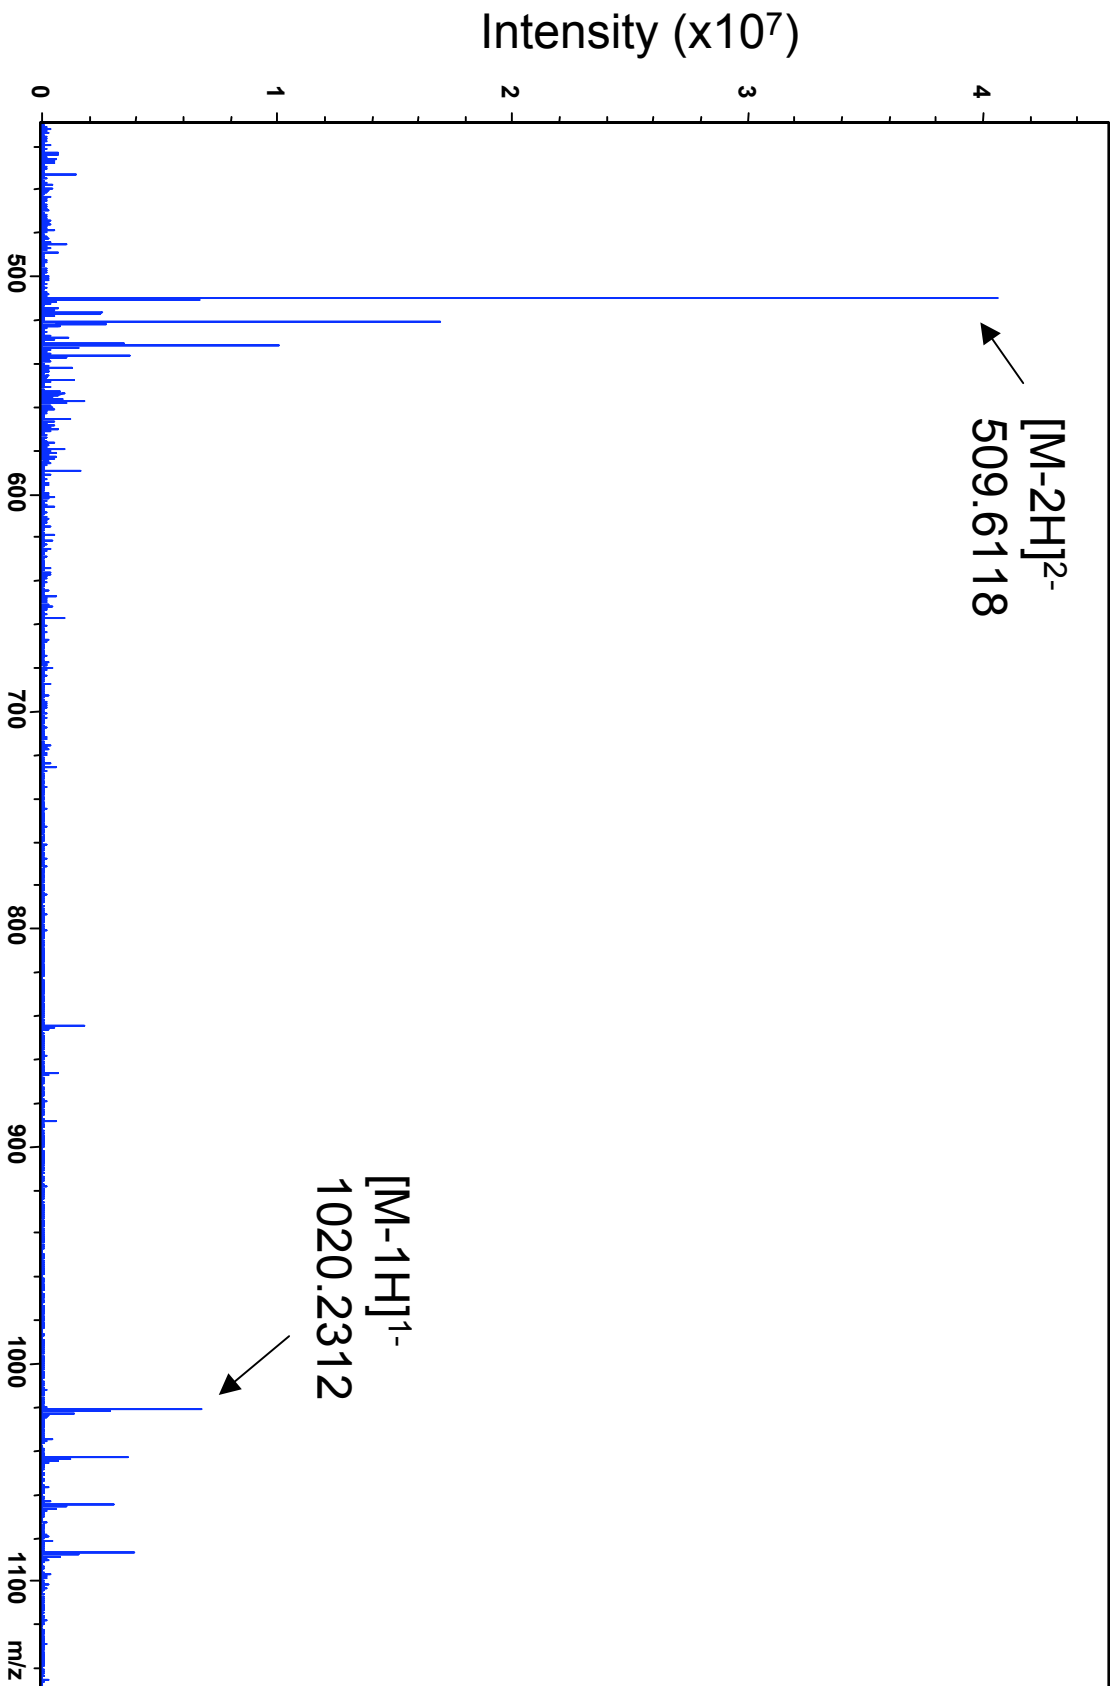

77

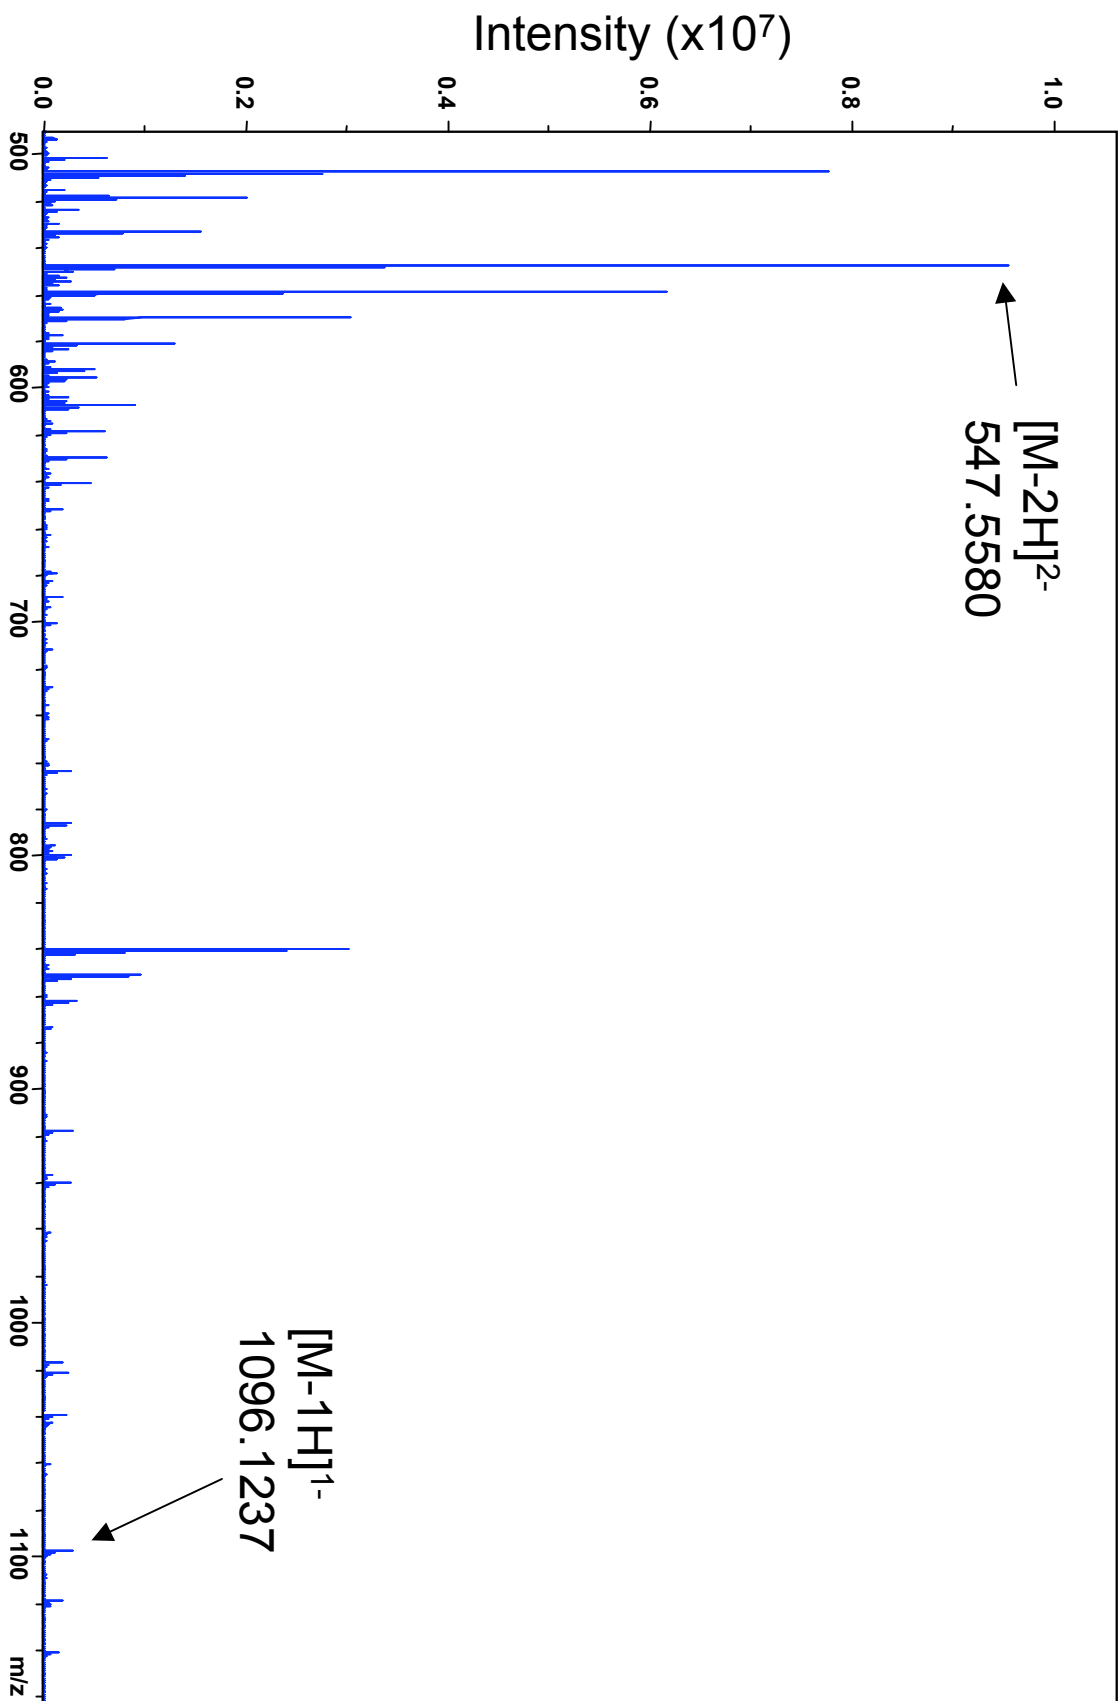

# 78

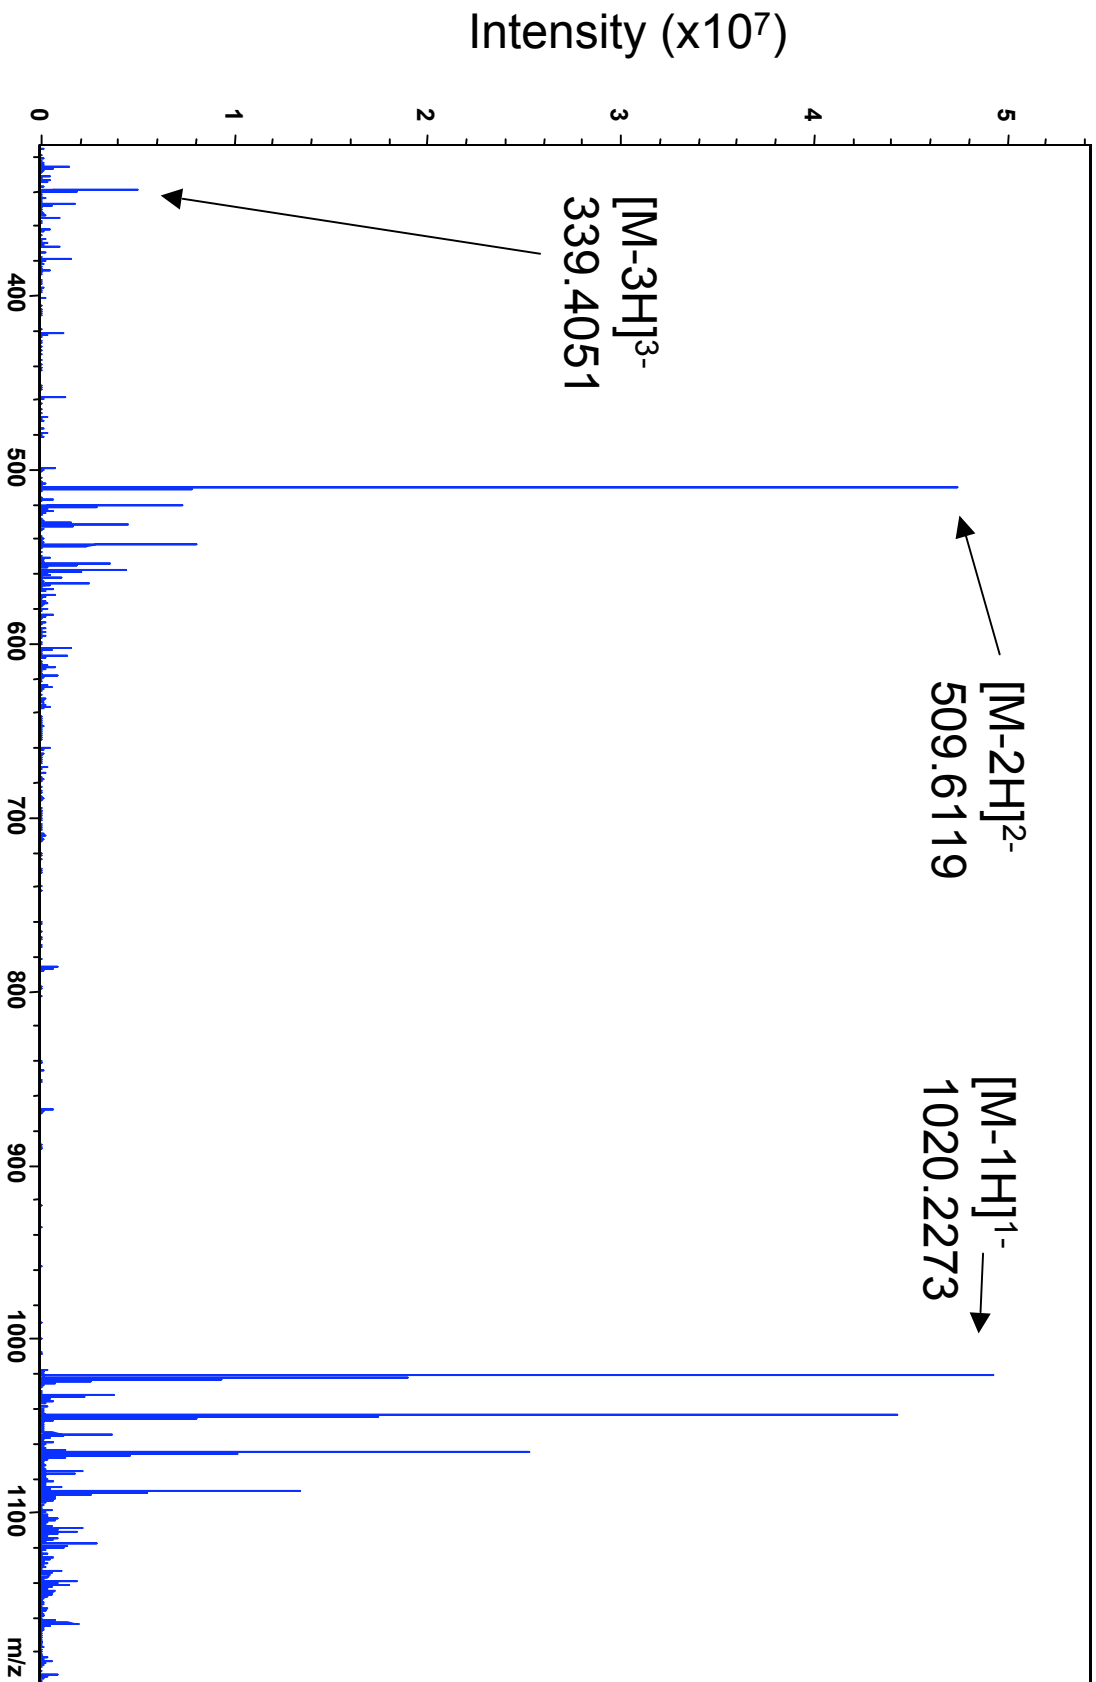

# 79

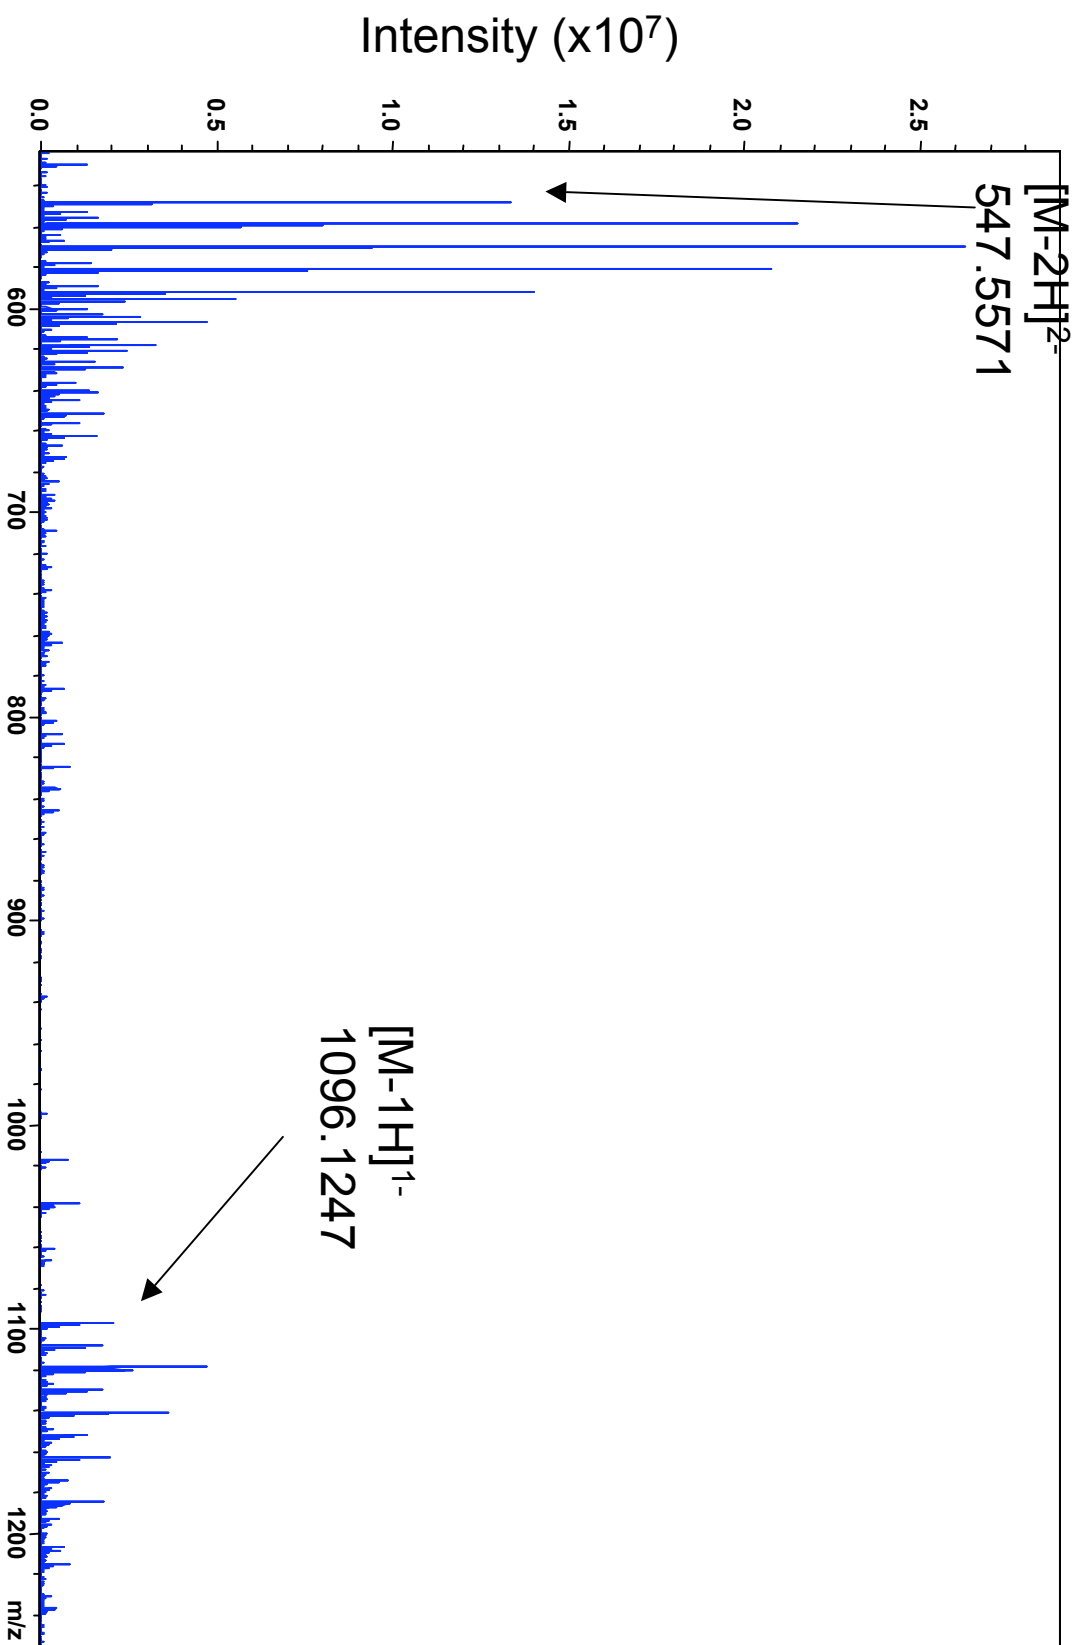

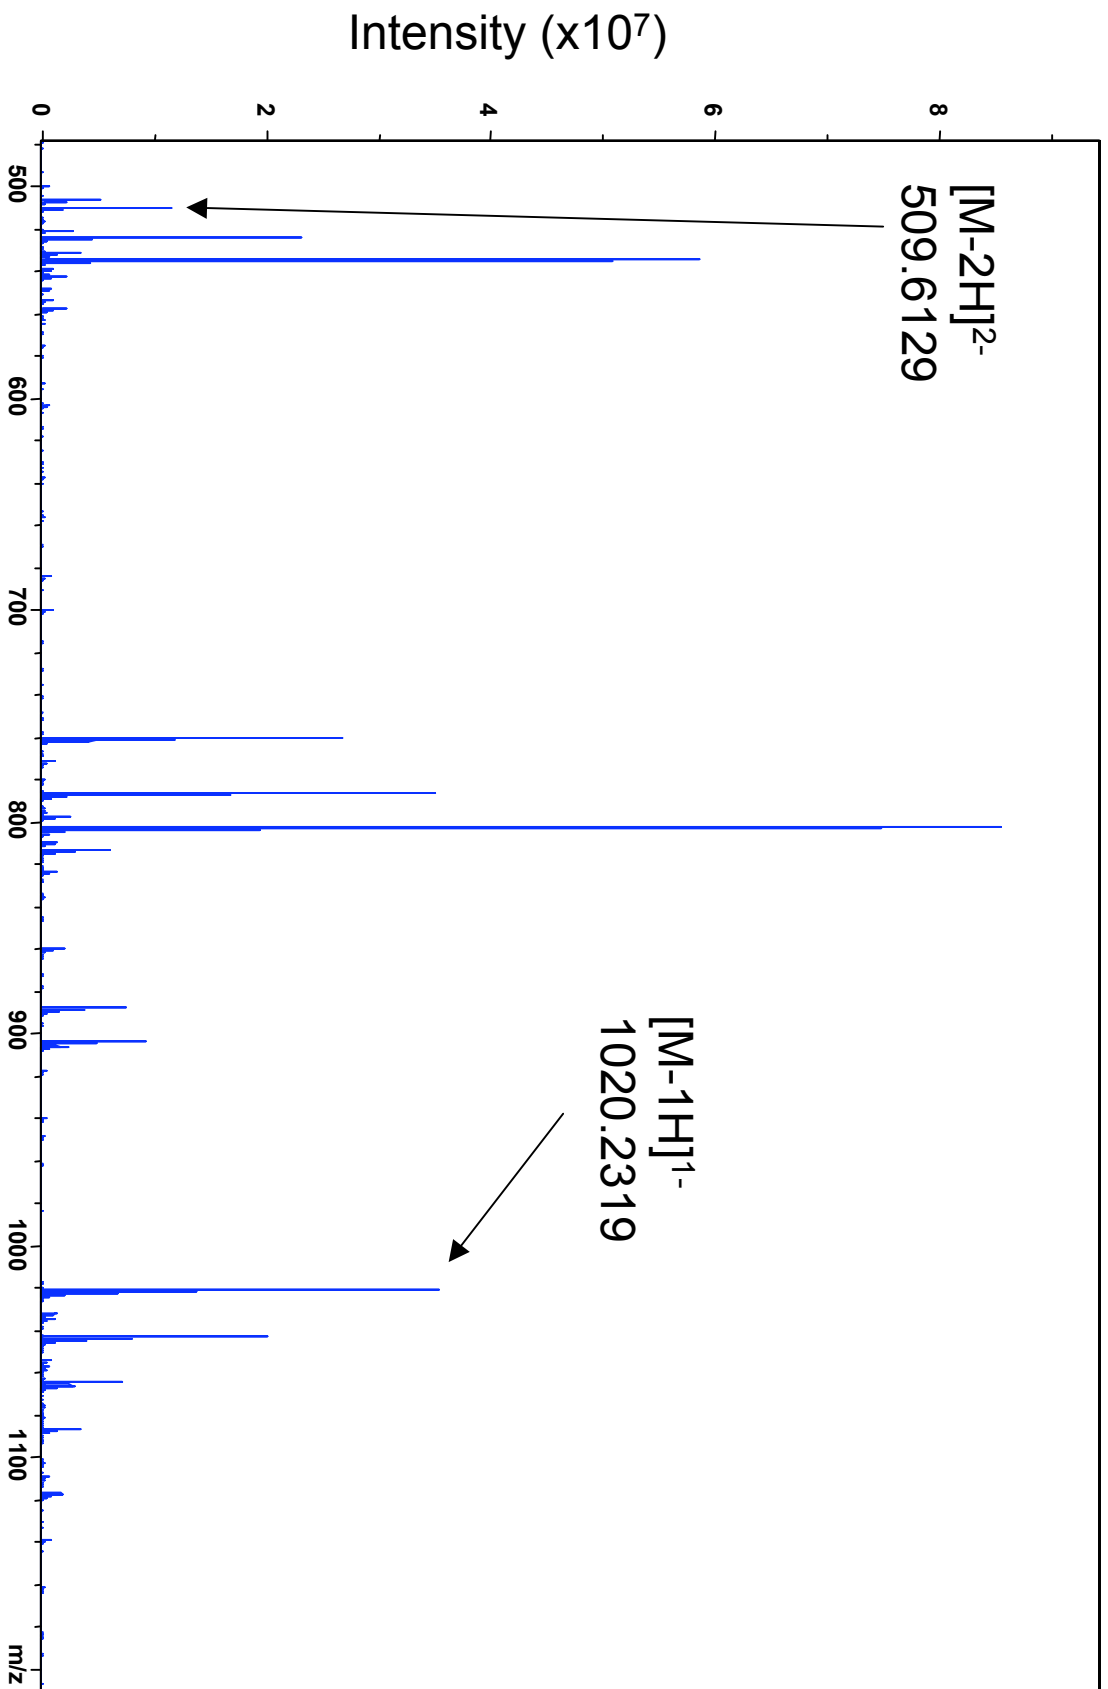



# 81

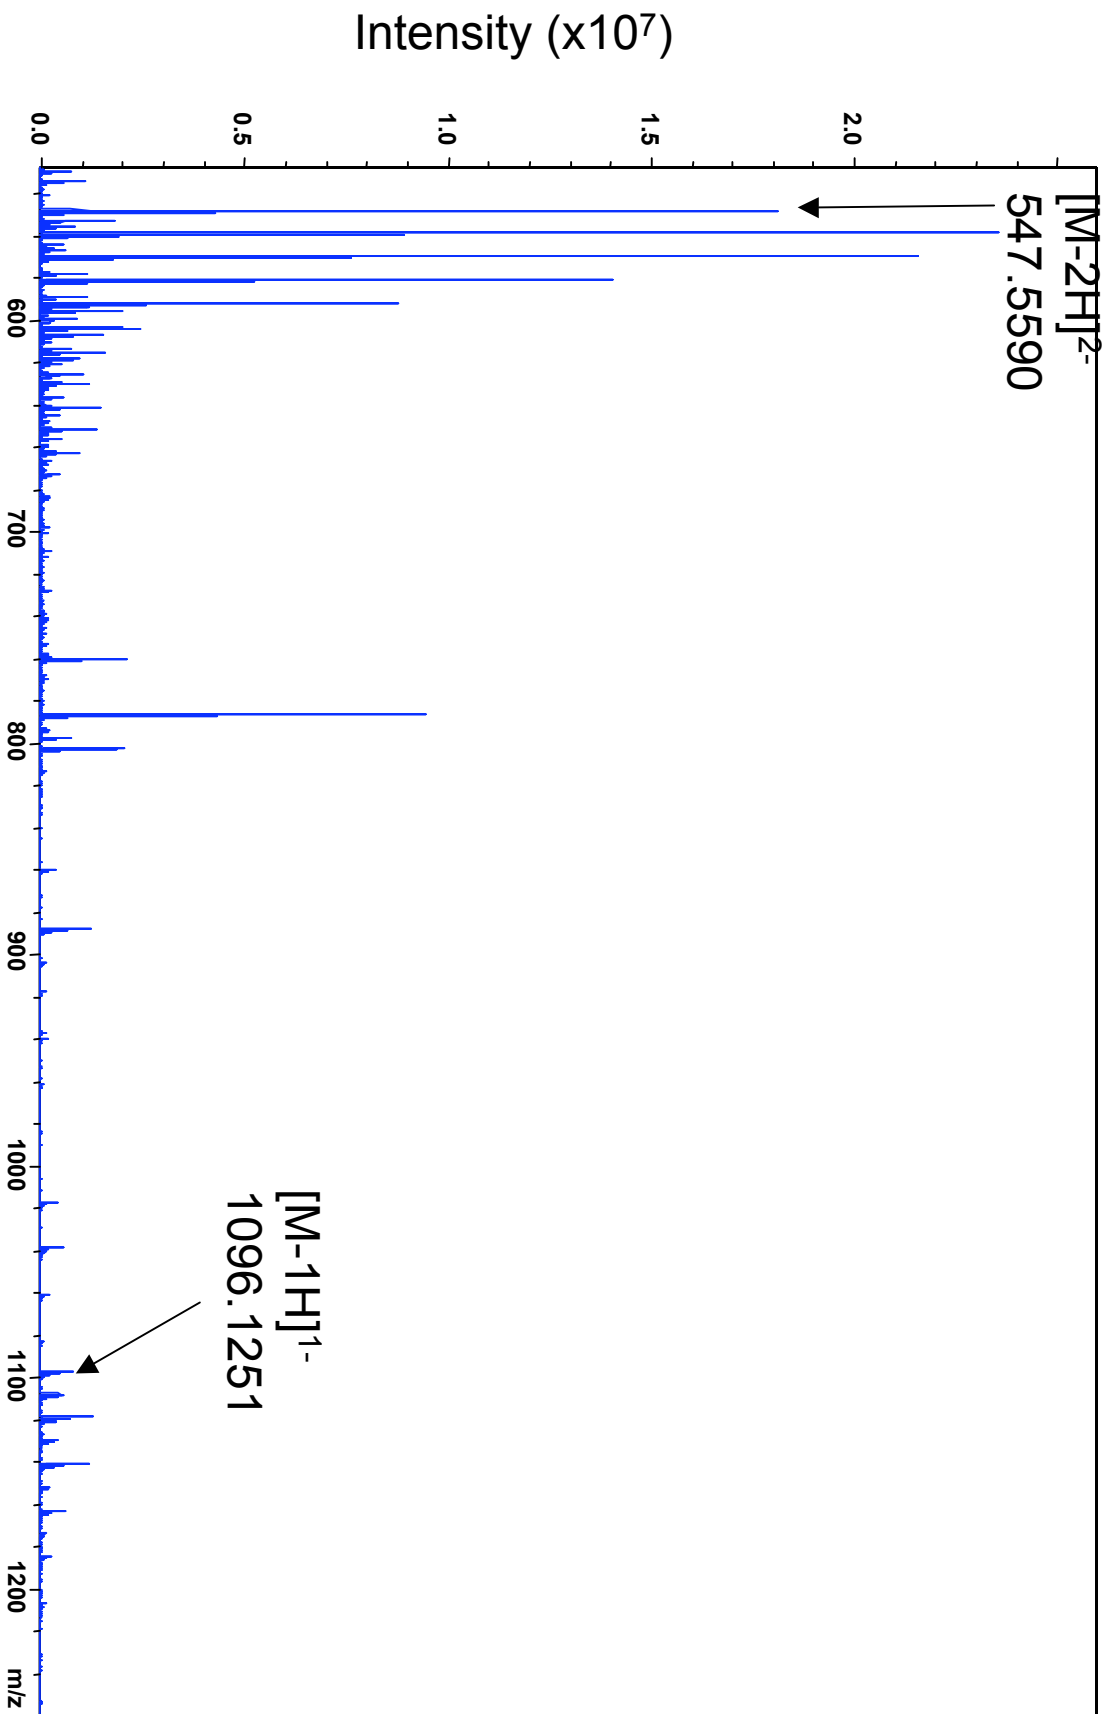

# 82

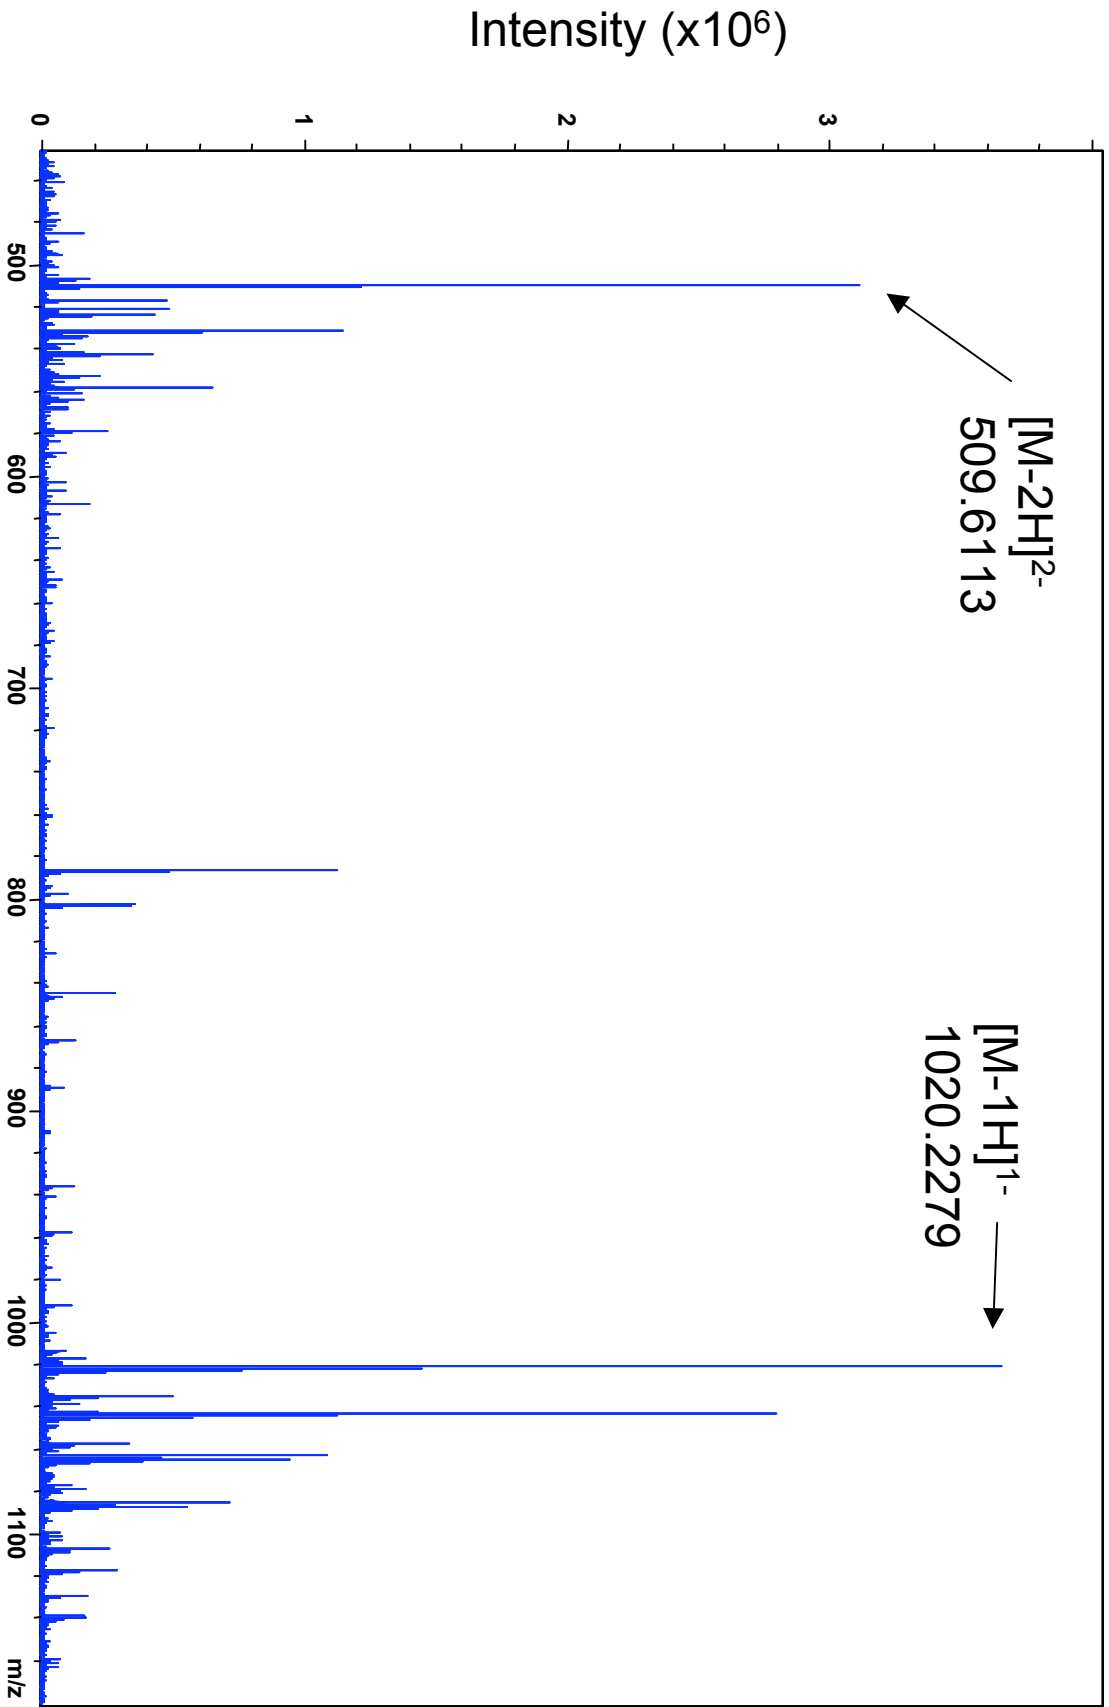

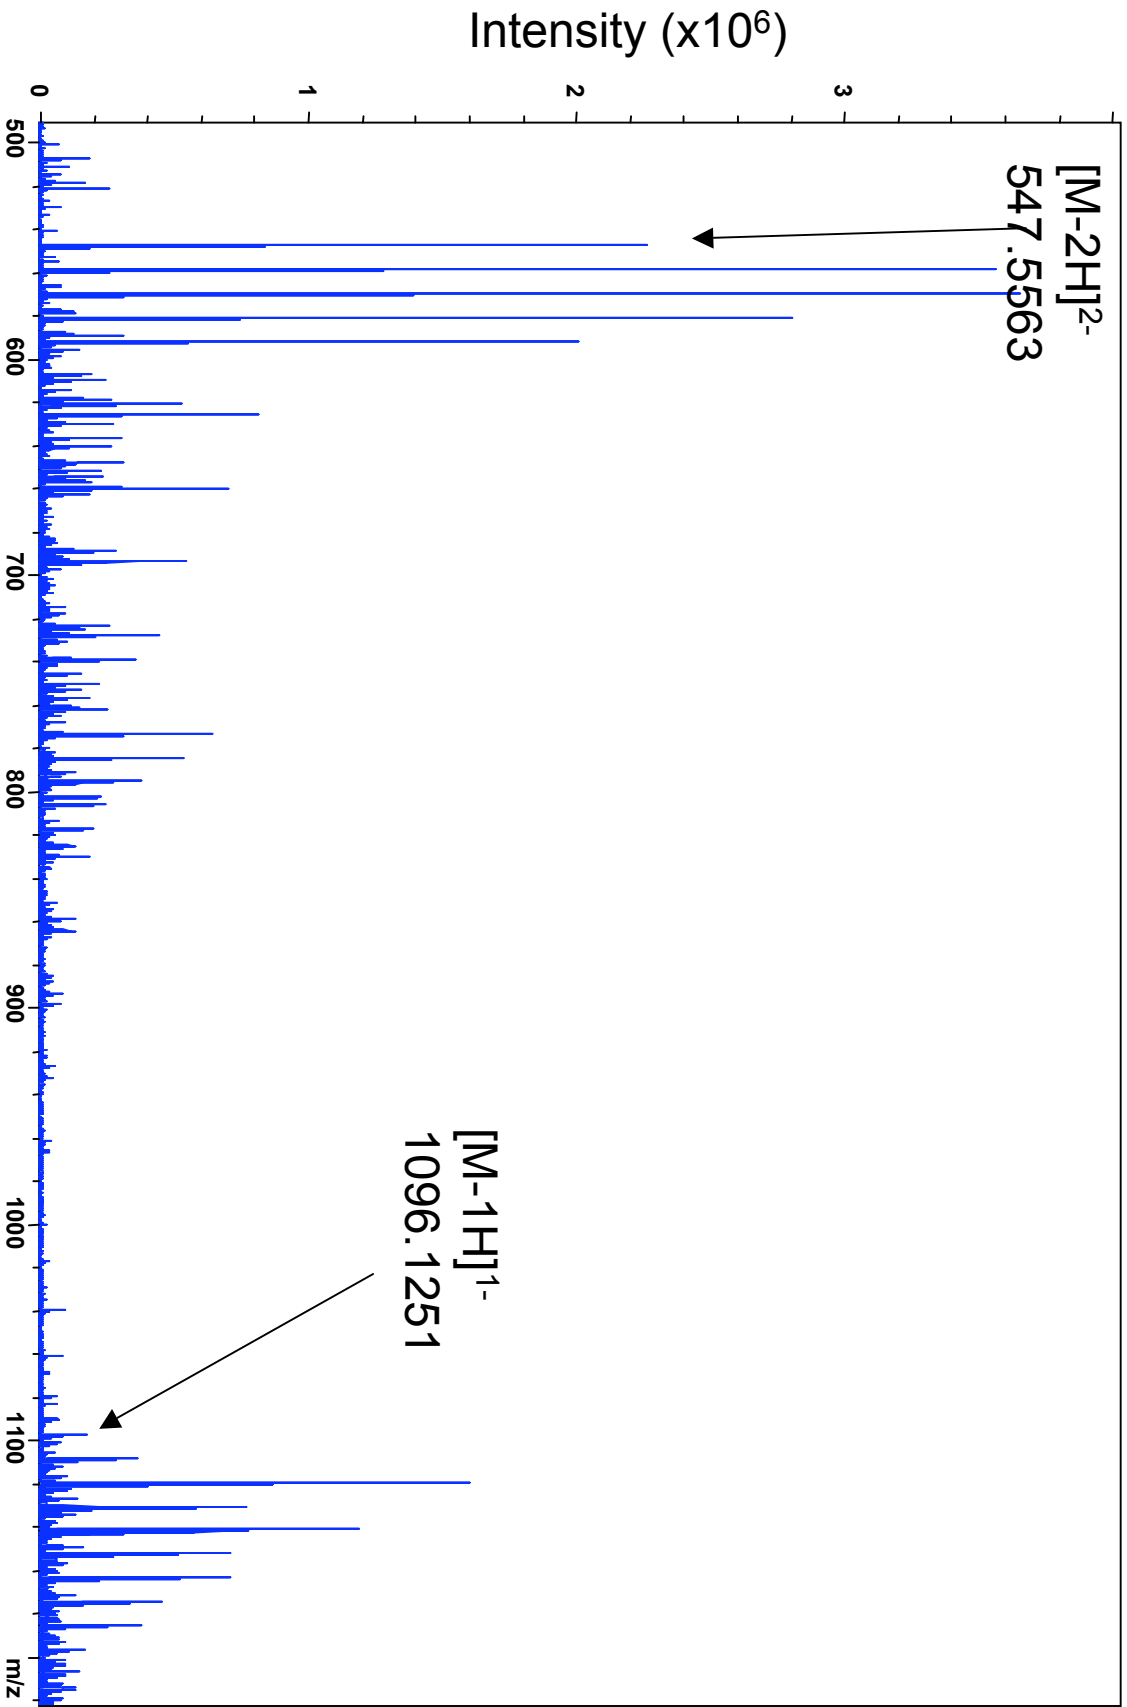

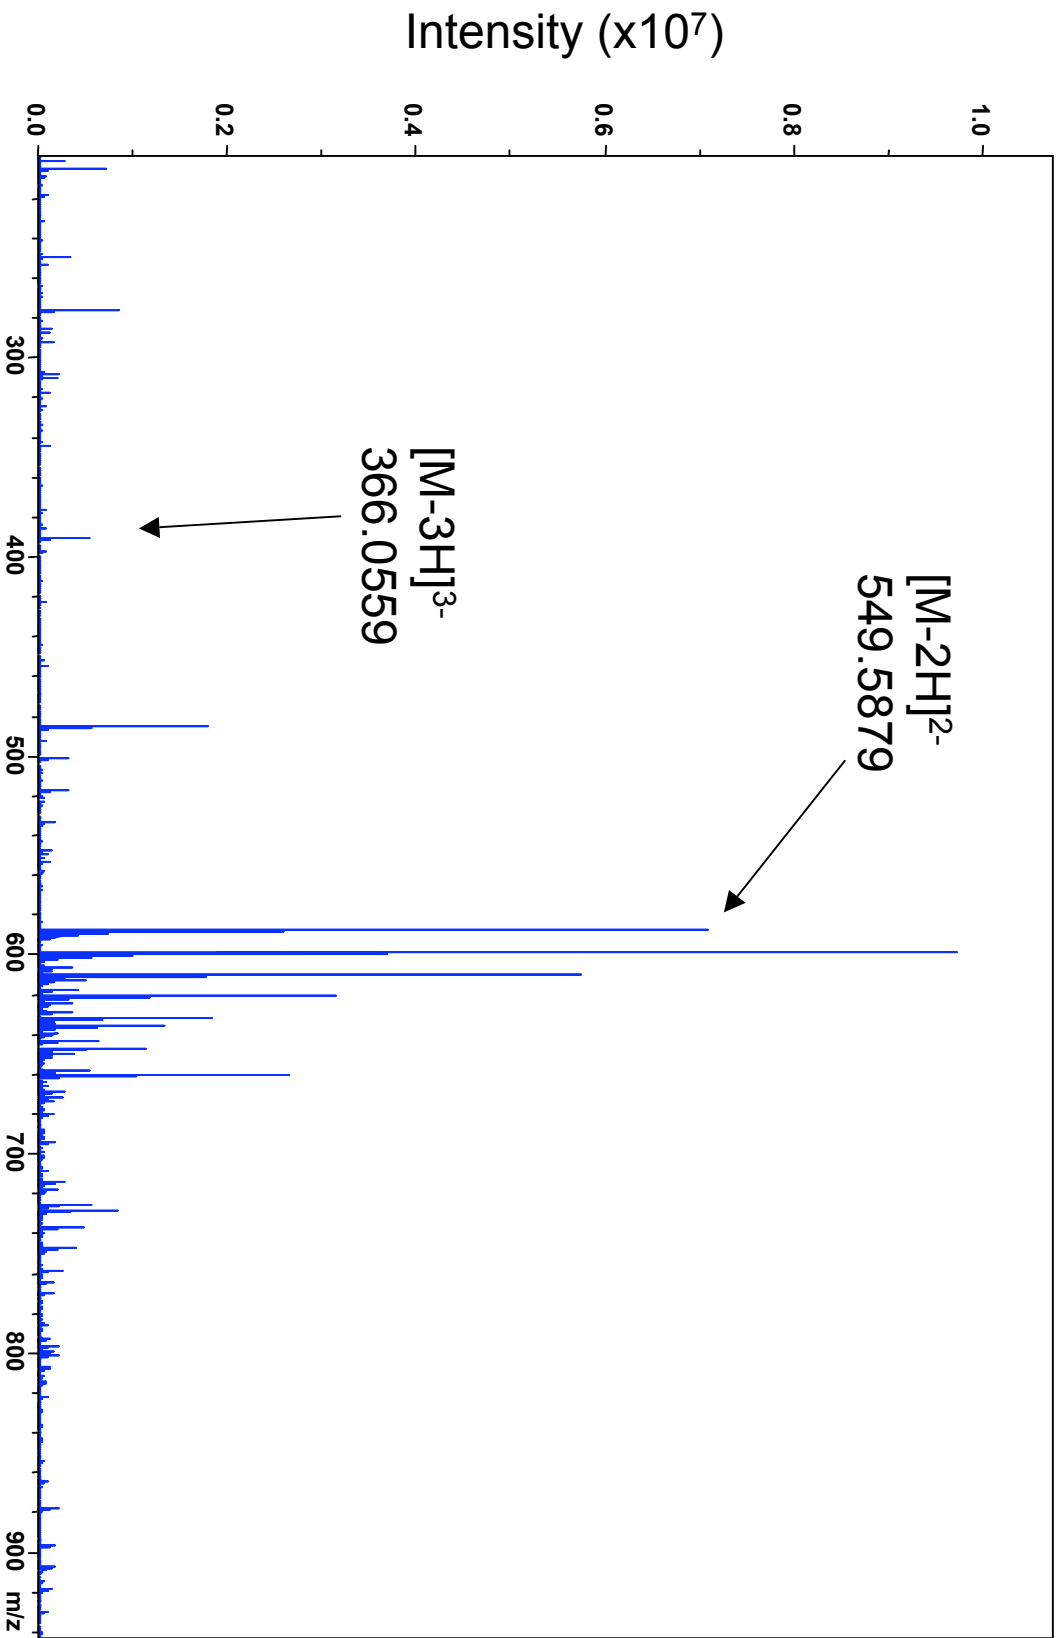

# 86

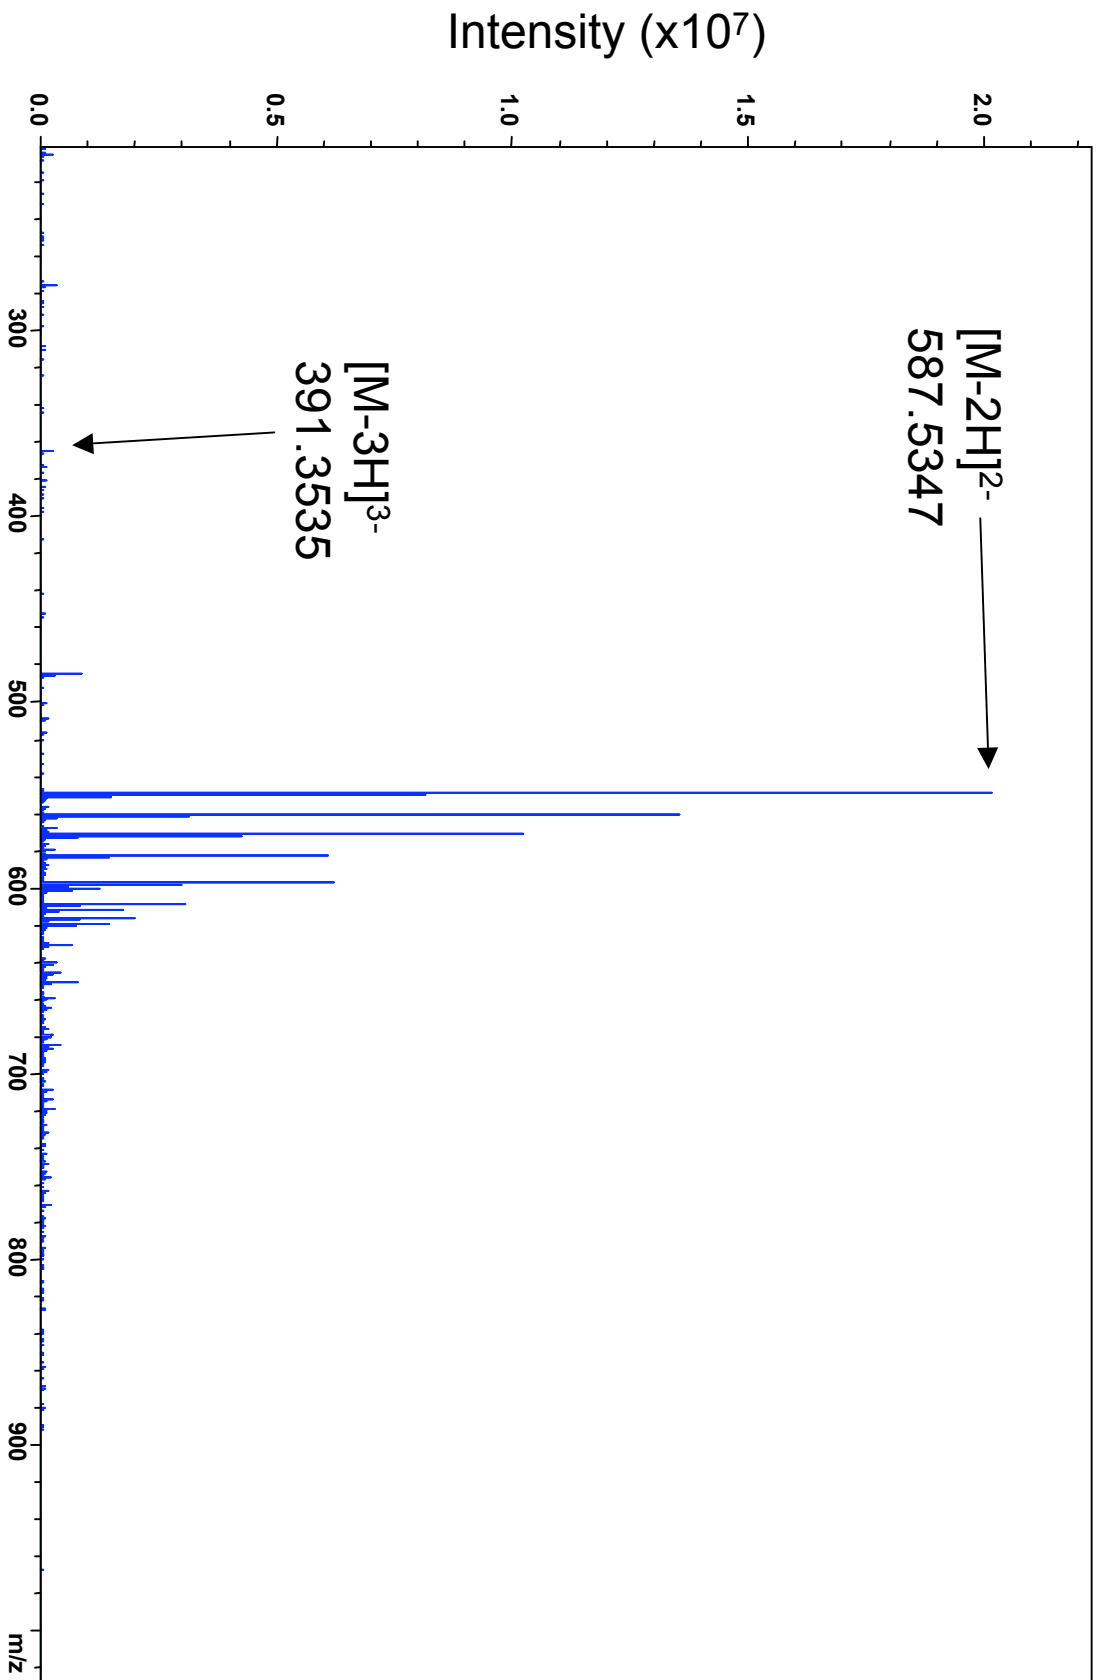

# 69

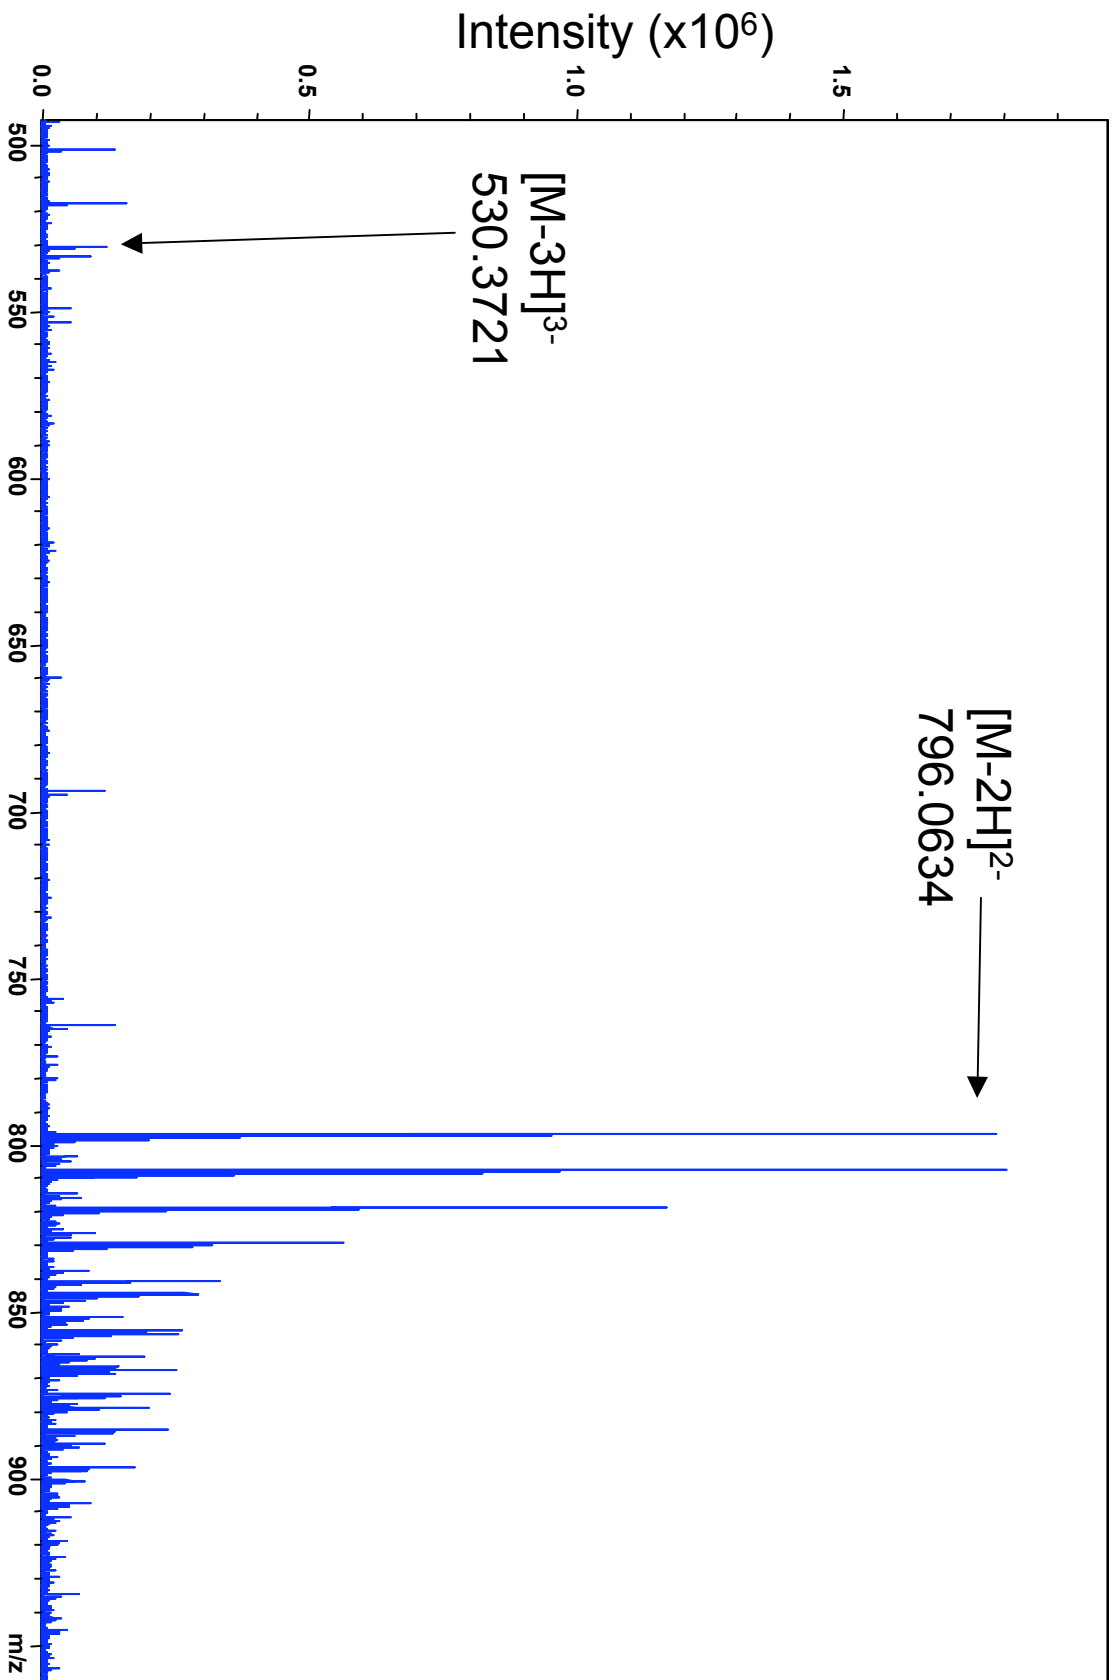

Supplement: NIHMS160487-supplement-Suppl_Info.pdf [file NIHMS160487-supplement-Suppl_Info.pdf]
